# Supplementary material for: The Proteomic Landscape of Resting and Activated CD4+ T Cells Reveal Insights into Cell Differentiation and Function
Source: Int J Mol Sci. 2020 Dec 29;22(1):275. doi: 10.3390/ijms22010275 (PMC7795831; doi:10.3390/ijms22010275)
Supplement: Supplementary file 1 [file ijms-22-00275-s001.zip]

Archive with 13 entries (13 files):
- Supplementary_figure_1.eps
- Supplementary_figure_2.eps
- Supplementary_figure_3.eps
- Supplementary_figure_4.eps
- Supplementary_figure_5.eps
- Supplementary_table_1.xlsx
- Supplementary_table_2.xlsx
- Supplementary_table_3.xlsx
- Supplementary_table_4.xlsx
- Supplementary_table_5.xlsx
- Supplementary_table_6.xlsx
- Supplementary_table_7.xlsx
- Supplementary_data_Legends.pdf
