# Supplementary material for: The Proteomic Landscape of Resting and Activated CD4+ T Cells Reveal Insights into Cell Differentiation and Function
Source: Int J Mol Sci. 2020 Dec 29;22(1):275. doi: 10.3390/ijms22010275 (PMC7795831; doi:10.3390/ijms22010275)
Supplement: Supplementary file 1 [file ijms-22-00275-s001.zip › Supplementary_table_1.xlsx]

## Sheet: Table1
Supplementary Table 1. Proteins identified from Activated and Resting CD4+ T-cells using MaxQuant and significantly changing proteins in Activated and Resting CD4+ T-cells in Donor 1 and 2
Significant_D1	-Log(P-value)_D1	log2FC_D1	Significant_D2	-Log(P-value)_D2	log2FC_D2	Protein IDs	Majority protein IDs	Uniprot_Accession	Protein_name	Gene_symbol	Gene name	eggNOG	EC	GOBP name	GOMF name	GOCC name	KEGG name	GSEA	GOBP	GOMF	GOCC	Reactome	SMART	Peptides	Razor + unique peptides	Unique peptides	Sequence coverage [%]	Unique + razor sequence coverage [%]	Unique sequence coverage [%]	Mol. weight [kDa]	Q-value	Score	Intensity	MS/MS count	Intensity Naive_D1_R1	Intensity Naive_D1_R2	Intensity Naive_D1_R3	Intensity Naive_D2_R1	Intensity Naive_D2_R2	Intensity Naive_D2_R3	Intensity Activated_D1_R1	Intensity Activated_D1_R2	Intensity Activated_D1_R3	Intensity Activated_D2_R1	Intensity Activated_D2_R2	Intensity Activated_D2_R3
	0.997631	16.0102	+	5.73166	21.8788	MARH5_HUMAN	MARH5_HUMANE3ubiquitin-proteinligaseMARCH5	Q9NX47	MARH5_HUMAN E3 ubiquitin-protein ligase MARCH5	MARCH5	MARCH5	NOG242263	6.3.2.-	biological regulation;cellular localization;cellular macromolecule localization;cellular macromolecule metabolic process;cellular metabolic process;cellular process;cellular protein localization;cellular protein metabolic process;localization;macromolecule localization;macromolecule metabolic process;macromolecule modification;metabolic process;negative regulation of biological process;negative r…	acid-amino acid ligase activity;binding;catalytic activity;cation binding;enzyme binding;GTPase binding;ion binding;ligase activity;ligase activity, forming carbon-nitrogen bonds;metal ion binding;protein binding;small conjugating protein ligase activity;transition metal ion binding;ubiquitin-protein ligase activity;zinc ion binding	cell part;cytoplasmic part;endoplasmic reticulum;endoplasmic reticulum membrane;endoplasmic reticulum part;integral to membrane;intracellular membrane-bounded organelle;intracellular organelle;intracellular organelle part;intracellular part;intrinsic to membrane;membrane;membrane part;membrane-bounded organelle;mitochondrial membrane;mitochondrial outer membrane;mitochondrial part;organelle;organ…		AAAYWAACM_V$HFH4_01;ACTAYRNNNCCCR_UNKNOWN;ACTGCCT,MIR-34B;CACTGCC,MIR-34A,MIR-34C,MIR-449;CAGCTG_V$AP4_Q5;CAGGTG_V$E12_Q6;CAIRO_LIVER_DEVELOPMENT_DN;chr10q23;FOSTER_TOLERANT_MACROPHAGE_DN;FOSTER_TOLERANT_MACROPHAGE_UP;GATTGGY_V$NFY_Q6_01;GCAAAAA,MIR-129;GRAESSMANN_APOPTOSIS_BY_SERUM_DEPRIVATION_UP;GSE10239_MEMORY_VS_DAY4.5_EFF_CD8_TCELL_DN;GSE10239_MEMORY_VS_KLRG1HIGH_EFF_CD8_TCELL_DN;GSE10239_ME…	GO:0000209;GO:0006464;GO:0008104;GO:0008152;GO:0009987;GO:0010638;GO:0010821;GO:0010822;GO:0016567;GO:0019538;GO:0022603;GO:0032446;GO:0033036;GO:0033043;GO:0033365;GO:0034613;GO:0043170;GO:0043412;GO:0044237;GO:0044238;GO:0044260;GO:0044267;GO:0048518;GO:0048519;GO:0048522;GO:0048523;GO:0050789;GO:0050793;GO:0050794;GO:0051093;GO:0051094;GO:0051128;GO:0051130;GO:0051179;GO:0051641;GO:0051865;GO:…	GO:0003824;GO:0004842;GO:0005488;GO:0005515;GO:0008270;GO:0016874;GO:0016879;GO:0016881;GO:0019787;GO:0019899;GO:0043167;GO:0043169;GO:0046872;GO:0046914;GO:0051020	GO:0005741;GO:0005783;GO:0005789;GO:0016020;GO:0016021;GO:0019867;GO:0031090;GO:0031224;GO:0031966;GO:0031968;GO:0043226;GO:0043227;GO:0043229;GO:0043231;GO:0044422;GO:0044424;GO:0044425;GO:0044429;GO:0044432;GO:0044444;GO:0044446;GO:0044464		SM00744	2	2	2	9.7	9.7	9.7	31.231	0.00043384	3.9151	61467000	4	0.001	22.4954	0.001	0.001	0.001	0.001	24.3275	22.2028	23.9977	22.3993	20.8471	22.3931
	0.345372	0.774333		3.492	1.81993	A0A1B0GUL7_HUMAN	A0A1B0GUL7_HUMANUncharacterizedprotein	A0A1B0GUL7	A0A1B0GUL7_HUMAN Uncharacterized protein															8	1	1	18.3	3.2	3.2	45.208	0.0010309	2.8182	172660000	0	23.768	23.8891	24.1398	0.001	0.001	0.001	26.4725	23.3601	24.2873	0.001	0.001	0.001
	3.2563	0.715335		0.807157	1.20929	A0A096LPI6_HUMAN	A0A096LPI6_HUMANUncharacterizedprotein(Fragment)	A0A096LPI6	A0A096LPI6_HUMAN Uncharacterized protein (Fragment)															17	17	0	69.2	69.2	0	30.376	0	280.94	9542000000	357	29.6147	29.5767	29.751	29.1391	27.6301	27.1246	30.4114	30.2673	30.4096	29.8303	28.9831	28.7082
	1.41496	0.602041		0	0	H3BN98_HUMAN;AR6P1_HUMAN	H3BN98_HUMANUncharacterizedprotein(Fragment)	H3BN98	H3BN98_HUMAN Uncharacterized protein (Fragment)					biosynthetic process;cellular biosynthetic process;cellular macromolecule biosynthetic process;cellular macromolecule metabolic process;cellular metabolic process;cellular process;cellular protein metabolic process;macromolecule biosynthetic process;macromolecule metabolic process;metabolic process;primary metabolic process;protein metabolic process;translation	structural constituent of ribosome;structural molecule activity	cell part;cytoplasmic part;intracellular non-membrane-bounded organelle;intracellular organelle;intracellular part;macromolecular complex;non-membrane-bounded organelle;organelle;ribonucleoprotein complex;ribosome			GO:0006412;GO:0008152;GO:0009058;GO:0009059;GO:0009987;GO:0019538;GO:0034645;GO:0043170;GO:0044237;GO:0044238;GO:0044249;GO:0044260;GO:0044267	GO:0003735;GO:0005198	GO:0005840;GO:0030529;GO:0032991;GO:0043226;GO:0043228;GO:0043229;GO:0043232;GO:0044424;GO:0044444;GO:0044464			9	4	4	43.5	23.6	23.6	27.168	0	11.019	626050000	50	25.3173	25.6284	25.8368	24.0978	24.1907	23.9004	26.4164	25.9718	26.2005	25.6543	26.1132	25.8812
	0.0410589	0.0982068		0.964188	-1.04361	K7EQG2_HUMAN	K7EQG2_HUMANUncharacterizedprotein(Fragment)	K7EQG2	K7EQG2_HUMAN Uncharacterized protein (Fragment)															2	2	2	42	42	42	16.448	0	56.181	351200000	35	25.2967	25.102	25.2453	23.6063	22.6171	22.9186	26.9286	24.3648	24.6452	0.001	23.7544	24.0474
	1.9293	-0.430022		0.373962	-7.11307	YJ005_HUMAN	YJ005_HUMANUncharacterizedproteinFLJ45252	Q6ZSR9	YJ005_HUMAN Uncharacterized protein FLJ45252			NOG43111												14	14	14	67.6	67.6	67.6	37.976	0	56.664	1191300000	125	27.4231	27.3013	27.1257	26.8615	25.982	25.3368	26.7718	26.8564	26.9319	25.0611	24.5657	25.4227
	0.654306	-11.214		0.49832	-8.99713	A0A0J9YYD9_HUMAN	A0A0J9YYD9_HUMANUncharacterizedprotein(Fragment)	A0A0J9YYD9	A0A0J9YYD9_HUMAN Uncharacterized protein (Fragment)															8	6	5	44.8	37.6	34.5	30.278	0	59.721	483610000	59	26.557	26.8866	26.5652	26.2588	24.1103	23.6623	22.0803	0.001	24.2855	0.001	23.1246	23.9144
	0.672498	1.24543	+	3.90717	4.63586	AAAS_HUMAN	AAAS_HUMANAladin	Q9NRG9	AAAS_HUMAN Aladin	AAAS	AAAS	NOG314927		behavior;biological regulation;biosynthetic process;carbohydrate metabolic process;carbohydrate transport;cell cycle;cell cycle process;cell surface receptor linked signaling pathway;cellular biosynthetic process;cellular component disassembly;cellular component disassembly at cellular level;cellular component organization;cellular component organization at cellular level;cellular component organ…		cell part;centrosome;cytoplasm;cytoplasmic part;cytoskeletal part;envelope;intracellular membrane-bounded organelle;intracellular non-membrane-bounded organelle;intracellular organelle;intracellular organelle part;intracellular part;macromolecular complex;membrane;membrane part;membrane-bounded organelle;microtubule organizing center;non-membrane-bounded organelle;nuclear envelope;nuclear membran…	RNA transport	ALCALA_APOPTOSIS;BONOME_OVARIAN_CANCER_SURVIVAL_SUBOPTIMAL_DEBULKING;CAMP_UP.V1_UP;chr12q13;ENDOMEMBRANE_SYSTEM;ENVELOPE;GARY_CD5_TARGETS_UP;GCM_BCL2L1;GCM_DENR;GCM_GSPT1;GCM_MLL;GCM_NF2;GCM_RAN;GCM_UBE2N;GOBERT_OLIGODENDROCYTE_DIFFERENTIATION_UP;GSE11924_TH1_VS_TH2_CD4_TCELL_UP;GSE14308_TH17_VS_NATURAL_TREG_UP;GSE15767_MED_VS_SCS_MAC_LN_DN;GSE17721_0.5H_VS_24H_LPS_BMDM_UP;GSE17721_0.5H_VS_24H_PO…	GO:0000278;GO:0003008;GO:0005975;GO:0006139;GO:0006464;GO:0006807;GO:0006810;GO:0006913;GO:0006950;GO:0006998;GO:0007049;GO:0007077;GO:0007165;GO:0007166;GO:0007610;GO:0007611;GO:0007612;GO:0008152;GO:0008643;GO:0008645;GO:0009058;GO:0009266;GO:0009408;GO:0009566;GO:0009628;GO:0009987;GO:0010033;GO:0010467;GO:0010827;GO:0015031;GO:0015749;GO:0015758;GO:0015931;GO:0016032;GO:0016043;GO:0016044;GO:…		GO:0005634;GO:0005635;GO:0005643;GO:0005654;GO:0005737;GO:0005813;GO:0005815;GO:0016020;GO:0031090;GO:0031965;GO:0031967;GO:0031975;GO:0032991;GO:0043226;GO:0043227;GO:0043228;GO:0043229;GO:0043231;GO:0043232;GO:0043234;GO:0044422;GO:0044424;GO:0044425;GO:0044428;GO:0044430;GO:0044444;GO:0044446;GO:0044464;GO:0046930	REACT_115831;REACT_163931;REACT_264487;REACT_268530;REACT_355174;REACT_6190;REACT_6354;REACT_6804;REACT_7991;REACT_9395	SM00320	11	11	11	31.5	31.5	31.5	59.573	0	19.557	305870000	27	24.1366	23.7907	23.6392	20.8616	19.9479	20.6759	26.4258	23.5792	25.2979	25.2636	25.2905	24.8388
	1.06359	-0.604947		1.25136	-0.909896	AAK1_HUMAN;BMP2K_HUMAN	AAK1_HUMANAP2-associatedproteinkinase1	Q2M2I8	AAK1_HUMAN AP2-associated protein kinase 1	AAK1	AAK1	COG0515	2.7.11.1	biological regulation;cellular component organization;cellular component organization or biogenesis;cellular macromolecule metabolic process;cellular membrane organization;cellular metabolic process;cellular process;cellular protein metabolic process;endocytosis;establishment of localization;macromolecule metabolic process;macromolecule modification;membrane invagination;membrane organization;met…	adenyl nucleotide binding;adenyl ribonucleotide binding;AP-2 adaptor complex binding;ATP binding;binding;catalytic activity;kinase activity;Notch binding;nucleotide binding;phosphotransferase activity, alcohol group as acceptor;protein binding;protein complex binding;protein kinase activity;protein serine/threonine kinase activity;purine nucleotide binding;purine ribonucleoside triphosphate bindi…	axon part;cell leading edge;cell part;cell projection part;clathrin-coated vesicle;coated pit;coated vesicle;cytoplasmic membrane-bounded vesicle;cytoplasmic part;cytoplasmic vesicle;extrinsic to membrane;extrinsic to plasma membrane;intracellular membrane-bounded organelle;intracellular organelle;intracellular part;membrane part;membrane-bounded organelle;membrane-bounded vesicle;organelle;plasm…		AACTTT_UNKNOWN;ACTAYRNNNCCCR_UNKNOWN;ADDYA_ERYTHROID_DIFFERENTIATION_BY_HEMIN;ASTON_MAJOR_DEPRESSIVE_DISORDER_DN;BURTON_ADIPOGENESIS_11;CAGCTG_V$AP4_Q5;CAGGTG_V$E12_Q6;CASORELLI_ACUTE_PROMYELOCYTIC_LEUKEMIA_UP;CHARAFE_BREAST_CANCER_LUMINAL_VS_MESENCHYMAL_DN;CHEN_METABOLIC_SYNDROM_NETWORK;CHICAS_RB1_TARGETS_LOW_SERUM;chr2p14;chr2p24;CTACCTC,LET-7A,LET-7B,LET-7C,LET-7D,LET-7E,LET-7F,MIR-98,LET-7G,L…	GO:0006464;GO:0006468;GO:0006793;GO:0006796;GO:0006810;GO:0006897;GO:0008152;GO:0008593;GO:0009966;GO:0009967;GO:0009987;GO:0010324;GO:0010468;GO:0010608;GO:0010646;GO:0010647;GO:0016043;GO:0016044;GO:0016192;GO:0016310;GO:0019222;GO:0019538;GO:0023051;GO:0023056;GO:0030100;GO:0031647;GO:0032879;GO:0032880;GO:0043170;GO:0043412;GO:0044237;GO:0044238;GO:0044260;GO:0044267;GO:0045747;GO:0046777;GO:…	GO:0000166;GO:0003824;GO:0004672;GO:0004674;GO:0005102;GO:0005112;GO:0005488;GO:0005515;GO:0005524;GO:0016301;GO:0016740;GO:0016772;GO:0016773;GO:0017076;GO:0030554;GO:0032403;GO:0032553;GO:0032555;GO:0032559;GO:0035612;GO:0035639	GO:0005905;GO:0016023;GO:0019897;GO:0019898;GO:0030135;GO:0030136;GO:0031252;GO:0031410;GO:0031982;GO:0031988;GO:0033267;GO:0043195;GO:0043226;GO:0043227;GO:0043229;GO:0043231;GO:0044424;GO:0044425;GO:0044444;GO:0044456;GO:0044459;GO:0044463;GO:0044464			29	29	29	42.9	42.9	42.9	103.88	0	206.05	2964100000	362	28.7516	28.635	28.6963	27.8467	27.0518	26.945	28.1293	27.6114	28.5274	26.7475	26.1577	26.2085
	3.53217	3.32167		2.3694	1.53667	AAMP_HUMAN	AAMP_HUMANAngio-associatedmigratorycellprotein	Q13685	AAMP_HUMAN Angio-associated migratory cell protein	AAMP	AAMP	COG2319		anatomical structure formation involved in morphogenesis;angiogenesis;biological regulation;cell differentiation;cell migration;cell motility;cellular component movement;cellular developmental process;cellular process;developmental process;locomotion;muscle cell migration;positive regulation of biological process;positive regulation of cell migration;positive regulation of cell motility;positive …	binding;carbohydrate binding;glycosaminoglycan binding;heparin binding;pattern binding;polysaccharide binding	cell part;cell surface;cytoplasm;intracellular part;membrane;plasma membrane		AACWWCAANK_UNKNOWN;AACYNNNNTTCCS_UNKNOWN;ACTAYRNNNCCCR_UNKNOWN;CAIRO_HEPATOBLASTOMA_CLASSES_UP;CARBOHYDRATE_BINDING;CCCNNGGGAR_V$OLF1_01;chr2q;CTGCAGY_UNKNOWN;DACOSTA_UV_RESPONSE_VIA_ERCC3_TTD_UP;DACOSTA_UV_RESPONSE_VIA_ERCC3_UP;GATTGGY_V$NFY_Q6_01;GCM_BECN1;GCM_BNIP1;GCM_DPF2;GCM_FANCC;GCM_FCGR2B;GCM_RING1;GCM_SMARCD1;GCM_SUPT4H1;GGGAGGRR_V$MAZ_Q6;GGGTGGRR_V$PAX4_03;GLYCOSAMINOGLYCAN_BINDING;GOL…	GO:0001525;GO:0006928;GO:0009987;GO:0010594;GO:0010595;GO:0014812;GO:0014909;GO:0016477;GO:0030154;GO:0030334;GO:0030335;GO:0032502;GO:0032879;GO:0040011;GO:0040012;GO:0040017;GO:0048518;GO:0048522;GO:0048646;GO:0048869;GO:0048870;GO:0050789;GO:0050794;GO:0051270;GO:0051272;GO:0065007;GO:2000145;GO:2000147	GO:0001871;GO:0005488;GO:0005539;GO:0008201;GO:0030246;GO:0030247	GO:0005737;GO:0005886;GO:0009986;GO:0016020;GO:0044424;GO:0044464		SM00320	7	7	7	22.8	22.8	22.8	46.75	0	23.177	371050000	58	22.9329	23.001	23.1986	22.5358	23.0332	22.3084	25.8492	26.4905	26.7579	23.8817	24.199	24.4067
	2.70595	2.33761	+	2.00897	5.91927	AAR2_HUMAN	AAR2_HUMANProteinAAR2homolog	Q9Y312	AAR2_HUMAN Protein AAR2 homolog	AAR2	AAR2	NOG319701												6	6	6	23.7	23.7	23.7	43.472	0	9.4552	143330000	8	21.08	20.4795	21.524	21.1674	17.7267	17.7671	23.134	23.5118	23.4505	25.6042	23.6847	25.1301
	3.48338	2.19714		2.6953	2.30191	SYAC_HUMAN	SYAC_HUMANAlanine--tRNAligase,cytoplasmic	P49588	SYAC_HUMAN Alanine--tRNA ligase, cytoplasmic	AARS	AARS	COG0013	6.1.1.7	alanyl-tRNA aminoacylation;amine metabolic process;amino acid activation;anatomical structure development;biological regulation;carboxylic acid metabolic process;cellular amine metabolic process;cellular amino acid metabolic process;cellular ketone metabolic process;cellular macromolecule metabolic process;cellular metabolic process;cellular nitrogen compound metabolic process;cellular process;ce…	adenyl nucleotide binding;adenyl ribonucleotide binding;alanine-tRNA ligase activity;amine binding;amino acid binding;aminoacyl-tRNA editing activity;aminoacyl-tRNA ligase activity;ATP binding;binding;carboxylic acid binding;carboxylic ester hydrolase activity;catalytic activity;cation binding;hydrolase activity;hydrolase activity, acting on ester bonds;ion binding;ligase activity;ligase activity…	cell part;cytoplasm;cytoplasmic part;cytosol;extracellular membrane-bounded organelle;extracellular organelle;extracellular region part;extracellular vesicular exosome;intracellular part;membrane;membrane-bounded organelle;membrane-bounded vesicle;organelle;vesicle	Aminoacyl-tRNA biosynthesis	ACEVEDO_NORMAL_TISSUE_ADJACENT_TO_LIVER_TUMOR_DN;AMINE_METABOLIC_PROCESS;AMINO_ACID_AND_DERIVATIVE_METABOLIC_PROCESS;AMINO_ACID_METABOLIC_PROCESS;BAE_BRCA1_TARGETS_UP;BHATI_G2M_ARREST_BY_2METHOXYESTRADIOL_DN;BIOPOLYMER_METABOLIC_PROCESS;BIOSYNTHETIC_PROCESS;BLUM_RESPONSE_TO_SALIRASIB_UP;BUYTAERT_PHOTODYNAMIC_THERAPY_STRESS_UP;CAIRO_HEPATOBLASTOMA_CLASSES_UP;CAMP_UP.V1_UP;CARBOXYLIC_ACID_METABOLIC…	GO:0001101;GO:0001942;GO:0003008;GO:0006082;GO:0006139;GO:0006396;GO:0006399;GO:0006400;GO:0006418;GO:0006419;GO:0006457;GO:0006520;GO:0006807;GO:0006950;GO:0006984;GO:0006986;GO:0007165;GO:0008033;GO:0008152;GO:0008544;GO:0009308;GO:0009451;GO:0009719;GO:0009888;GO:0009987;GO:0010033;GO:0010243;GO:0010467;GO:0010941;GO:0014075;GO:0016070;GO:0019538;GO:0019752;GO:0021680;GO:0022404;GO:0022405;GO:…	GO:0000049;GO:0000166;GO:0002161;GO:0003676;GO:0003723;GO:0003824;GO:0004812;GO:0004813;GO:0005488;GO:0005524;GO:0008270;GO:0016597;GO:0016787;GO:0016788;GO:0016874;GO:0016875;GO:0016876;GO:0017076;GO:0030554;GO:0031406;GO:0032553;GO:0032555;GO:0032559;GO:0035639;GO:0043167;GO:0043169;GO:0043176;GO:0046872;GO:0046914;GO:0052689	GO:0005737;GO:0005829;GO:0016020;GO:0031982;GO:0031988;GO:0043226;GO:0043227;GO:0043230;GO:0044421;GO:0044424;GO:0044444;GO:0044464;GO:0065010;GO:0070062	REACT_15306	SM00863	49	49	49	58.8	58.8	58.8	106.81	0	323.31	9806800000	637	28.7639	28.5477	28.5789	27.7495	27.1152	26.698	31.1556	30.5392	30.7871	29.6895	29.3891	29.3899
	1.48123	5.31284		0.784332	0.819075	SYAM_HUMAN	SYAM_HUMANAlanine--tRNAligase,mitochondrial	Q5JTZ9	SYAM_HUMAN Alanine--tRNA ligase, mitochondrial	AARS2	AARS2	COG0013	6.1.1.7	alanyl-tRNA aminoacylation;amine metabolic process;amino acid activation;carboxylic acid metabolic process;cellular amine metabolic process;cellular amino acid metabolic process;cellular component assembly;cellular component assembly at cellular level;cellular component organization;cellular component organization at cellular level;cellular component organization or biogenesis;cellular component …	adenyl nucleotide binding;adenyl ribonucleotide binding;alanine-tRNA ligase activity;aminoacyl-tRNA ligase activity;ATP binding;binding;catalytic activity;cation binding;ion binding;ligase activity;ligase activity, forming aminoacyl-tRNA and related compounds;ligase activity, forming carbon-oxygen bonds;metal ion binding;nucleic acid binding;nucleotide binding;purine nucleotide binding;purine rib…	cell part;cytoplasmic part;intracellular membrane-bounded organelle;intracellular organelle;intracellular part;membrane-bounded organelle;mitochondrion;organelle	Aminoacyl-tRNA biosynthesis	ACEVEDO_LIVER_TUMOR_VS_NORMAL_ADJACENT_TISSUE_UP;chr6p21;CTTTGA_V$LEF1_Q2;GAUSSMANN_MLL_AF4_FUSION_TARGETS_A_DN;GCANCTGNY_V$MYOD_Q6;GCM_GSPT1;GCM_MLL;GCM_NF2;GCM_SUFU;GRADE_COLON_CANCER_UP;GSE11924_TH1_VS_TH2_CD4_TCELL_UP;GSE25087_TREG_VS_TCONV_ADULT_DN;GSE2706_UNSTIM_VS_8H_LPS_DC_UP;GSE30083_SP1_VS_SP4_THYMOCYTE_UP;GSE32423_CTRL_VS_IL7_IL4_MEMORY_CD8_TCELL_DN;KEGG_AMINOACYL_TRNA_BIOSYNTHESIS;REA…	GO:0000959;GO:0006082;GO:0006139;GO:0006399;GO:0006418;GO:0006419;GO:0006461;GO:0006520;GO:0006807;GO:0008152;GO:0009308;GO:0009987;GO:0010467;GO:0016043;GO:0016070;GO:0019752;GO:0022607;GO:0033108;GO:0034621;GO:0034622;GO:0034641;GO:0034660;GO:0042180;GO:0043038;GO:0043039;GO:0043170;GO:0043436;GO:0043623;GO:0043933;GO:0044106;GO:0044237;GO:0044238;GO:0044260;GO:0044281;GO:0065003;GO:0070127;GO:…	GO:0000049;GO:0000166;GO:0003676;GO:0003723;GO:0003824;GO:0004812;GO:0004813;GO:0005488;GO:0005524;GO:0008270;GO:0016874;GO:0016875;GO:0016876;GO:0017076;GO:0030554;GO:0032553;GO:0032555;GO:0032559;GO:0035639;GO:0043167;GO:0043169;GO:0046872;GO:0046914	GO:0005739;GO:0043226;GO:0043227;GO:0043229;GO:0043231;GO:0044424;GO:0044444;GO:0044464	REACT_15302	SM00863	10	10	10	14	14	14	107.34	0	15.058	574020000	28	23.5626	22.9996	18.6354	23.3974	22.741	22.1155	28.1451	26.8247	26.1663	24.1871	23.266	23.258
	1.46826	3.41063	+	1.05604	13.0866	AASD1_HUMAN	AASD1_HUMANAlanyl-tRNAeditingproteinAarsd1	Q9BTE6	AASD1_HUMAN Alanyl-tRNA editing protein Aarsd1	AARSD1	AARSD1	COG2872		alanyl-tRNA aminoacylation;amine metabolic process;amino acid activation;carboxylic acid metabolic process;cellular amine metabolic process;cellular amino acid metabolic process;cellular ketone metabolic process;cellular macromolecule metabolic process;cellular metabolic process;cellular nitrogen compound metabolic process;cellular process;macromolecule metabolic process;metabolic process;ncRNA m…	adenyl nucleotide binding;adenyl ribonucleotide binding;alanine-tRNA ligase activity;aminoacyl-tRNA ligase activity;ATP binding;binding;catalytic activity;cation binding;ion binding;ligase activity;ligase activity, forming aminoacyl-tRNA and related compounds;ligase activity, forming carbon-oxygen bonds;metal ion binding;nucleic acid binding;nucleotide binding;purine nucleotide binding;purine rib…	cell part;cytoplasm;intracellular membrane-bounded organelle;intracellular organelle;intracellular part;membrane-bounded organelle;nucleus;organelle		AGUIRRE_PANCREATIC_CANCER_COPY_NUMBER_UP;BRUINS_UVC_RESPONSE_LATE;CAGCTG_V$AP4_Q5;CAIRO_HEPATOBLASTOMA_CLASSES_UP;CASORELLI_ACUTE_PROMYELOCYTIC_LEUKEMIA_DN;CCAWWNAAGG_V$SRF_Q4;chr17q21;GCANCTGNY_V$MYOD_Q6;GGGCGGR_V$SP1_Q6;GRAESSMANN_APOPTOSIS_BY_DOXORUBICIN_DN;GSE10239_KLRG1INT_VS_KLRG1HIGH_EFF_CD8_TCELL_UP;GSE10463_CD40L_AND_VA347_VS_CD40L_IN_DC_DN;GSE10856_CTRL_VS_TNFRSF6B_IN_MACROPHAGE_DN;GSE1…	GO:0006082;GO:0006139;GO:0006399;GO:0006418;GO:0006419;GO:0006520;GO:0006807;GO:0008152;GO:0009308;GO:0009987;GO:0016070;GO:0019752;GO:0034641;GO:0034660;GO:0042180;GO:0043038;GO:0043039;GO:0043170;GO:0043436;GO:0044106;GO:0044237;GO:0044238;GO:0044260;GO:0044281;GO:0090304	GO:0000166;GO:0003676;GO:0003824;GO:0004812;GO:0004813;GO:0005488;GO:0005524;GO:0016874;GO:0016875;GO:0016876;GO:0017076;GO:0030554;GO:0032553;GO:0032555;GO:0032559;GO:0035639;GO:0043167;GO:0043169;GO:0046872	GO:0005634;GO:0005737;GO:0043226;GO:0043227;GO:0043229;GO:0043231;GO:0044424;GO:0044464		SM00863	5	5	5	25.7	25.7	25.7	45.479	0	25.491	246760000	27	23.6711	22.2037	20.1607	18.0313	16.8183	0.001	25.9951	25.4959	24.7764	24.4428	25.1536	24.514
	0.731644	-1.42782		0.539788	1.21727	ADPPT_HUMAN	ADPPT_HUMANL-aminoadipate-semialdehydedehydrogenase-phosphopantetheinyltransferase	Q9NRN7	ADPPT_HUMAN L-aminoadipate-semialdehyde dehydrogenase-phosphopantetheinyl transferase	AASDHPPT	AASDHPPT	COG2091	2.7.8.-	amine metabolic process;carboxylic acid metabolic process;cellular amine metabolic process;cellular amino acid metabolic process;cellular ketone metabolic process;cellular metabolic process;cellular modified amino acid metabolic process;cellular nitrogen compound metabolic process;cellular process;coenzyme metabolic process;cofactor metabolic process;metabolic process;nitrogen compound metabolic …	binding;catalytic activity;cation binding;holo-[acyl-carrier-protein] synthase activity;ion binding;magnesium ion binding;metal ion binding;phosphotransferase activity, for other substituted phosphate groups;transferase activity;transferase activity, transferring phosphorus-containing groups	cell part;cytoplasmic part;cytosol;extracellular membrane-bounded organelle;extracellular organelle;extracellular region part;extracellular vesicular exosome;intracellular part;membrane-bounded organelle;membrane-bounded vesicle;organelle;vesicle	Pantothenate and CoA biosynthesis	ACEVEDO_LIVER_CANCER_UP;BAELDE_DIABETIC_NEPHROPATHY_DN;BLALOCK_ALZHEIMERS_DISEASE_DN;BROWN_MYELOID_CELL_DEVELOPMENT_DN;chr11q22;DIAZ_CHRONIC_MEYLOGENOUS_LEUKEMIA_UP;ENK_UV_RESPONSE_KERATINOCYTE_DN;ERB2_UP.V1_DN;FEVR_CTNNB1_TARGETS_DN;FLECHNER_PBL_KIDNEY_TRANSPLANT_OK_VS_DONOR_UP;FORTSCHEGGER_PHF8_TARGETS_DN;GATTGGY_V$NFY_Q6_01;GEORGES_TARGETS_OF_MIR192_AND_MIR215;GGGCGGR_V$SP1_Q6;GGGTGGRR_V$PAX4_…	GO:0006082;GO:0006520;GO:0006575;GO:0006732;GO:0006766;GO:0006767;GO:0006807;GO:0008152;GO:0009308;GO:0009987;GO:0015939;GO:0019752;GO:0034641;GO:0042180;GO:0043436;GO:0044106;GO:0044237;GO:0044238;GO:0044281;GO:0051186	GO:0000287;GO:0003824;GO:0005488;GO:0008897;GO:0016740;GO:0016772;GO:0016780;GO:0043167;GO:0043169;GO:0046872	GO:0005829;GO:0031982;GO:0031988;GO:0043226;GO:0043227;GO:0043230;GO:0044421;GO:0044424;GO:0044444;GO:0044464;GO:0065010;GO:0070062	REACT_11172		7	7	7	27.5	27.5	27.5	35.776	0	17.668	496550000	53	26.2705	25.738	25.6753	25.9768	22.763	23.5572	25.2976	25.3831	22.7197	25.4633	24.8493	25.6362
	2.11367	1.92352		1.67877	3.21811	AATF_HUMAN	AATF_HUMANProteinAATF	Q9NY61	AATF_HUMAN Protein AATF	AATF	AATF	NOG270454		biological adhesion;biological regulation;cell adhesion;cell division;cell surface receptor linked signaling pathway;cellular component biogenesis;cellular component biogenesis at cellular level;cellular component organization or biogenesis;cellular component organization or biogenesis at cellular level;cellular process;cellular response to stimulus;cellular response to stress;embryonic cleavage;…	binding;leucine zipper domain binding;LRR domain binding;nucleic acid binding transcription factor activity;protein binding;protein domain specific binding;sequence-specific DNA binding transcription factor activity	adherens junction;anchoring junction;cell junction;cell part;cell-substrate adherens junction;cell-substrate junction;centrosome;cytoplasm;cytoplasmic part;cytoskeletal part;focal adhesion;Golgi apparatus;intracellular membrane-bounded organelle;intracellular non-membrane-bounded organelle;intracellular organelle;intracellular organelle part;intracellular part;membrane-bounded organelle;microtubu…		ACOSTA_PROLIFERATION_INDEPENDENT_MYC_TARGETS_UP;ALFANO_MYC_TARGETS;ANTI_APOPTOSIS;APOPTOSIS_GO;BENPORATH_EED_TARGETS;BENPORATH_ES_WITH_H3K27ME3;BHAT_ESR1_TARGETS_VIA_AKT1_UP;BRUINS_UVC_RESPONSE_LATE;CACGTG_V$MYC_Q2;CAIRO_HEPATOBLASTOMA_CLASSES_UP;CAMP_UP.V1_UP;CASORELLI_ACUTE_PROMYELOCYTIC_LEUKEMIA_DN;CELL_DEVELOPMENT;CHEOK_RESPONSE_TO_MERCAPTOPURINE_AND_HD_MTX_DN;chr17q11;DNA_BINDING;DODD_NASOPH…	GO:0006355;GO:0006357;GO:0006950;GO:0006974;GO:0007155;GO:0007165;GO:0007166;GO:0007167;GO:0007169;GO:0007346;GO:0009889;GO:0009890;GO:0009891;GO:0009892;GO:0009893;GO:0009987;GO:0010468;GO:0010556;GO:0010557;GO:0010558;GO:0010559;GO:0010561;GO:0010604;GO:0010605;GO:0010628;GO:0010941;GO:0010942;GO:0019219;GO:0019222;GO:0022610;GO:0022613;GO:0031323;GO:0031324;GO:0031325;GO:0031326;GO:0031327;GO:…	GO:0001071;GO:0003700;GO:0005488;GO:0005515;GO:0019904;GO:0030275;GO:0043522	GO:0005634;GO:0005730;GO:0005737;GO:0005794;GO:0005813;GO:0005815;GO:0005912;GO:0005924;GO:0005925;GO:0030054;GO:0030055;GO:0043226;GO:0043227;GO:0043228;GO:0043229;GO:0043231;GO:0043232;GO:0044422;GO:0044424;GO:0044428;GO:0044430;GO:0044444;GO:0044446;GO:0044464;GO:0070161	REACT_13638		11	11	11	33	33	33	63.132	0	38.367	530500000	43	24.7517	24.5824	24.7648	23.4344	20.7177	21.1467	26.759	25.902	27.2084	24.6023	24.9888	25.362
	0.345324	-0.62258		0.923494	13.987	GABT_HUMAN	GABT_HUMAN4-aminobutyrateaminotransferase,mitochondrial	P80404	GABT_HUMAN 4-aminobutyrate aminotransferase, mitochondrial	ABAT	ABAT	COG0160	2.6.1.19;2.6.1.22	adult behavior;amine catabolic process;amine metabolic process;behavior;behavioral response to cocaine;biological regulation;carboxylic acid catabolic process;carboxylic acid metabolic process;catabolic process;cell communication;cell-cell signaling;cellular amine metabolic process;cellular amino acid catabolic process;cellular amino acid metabolic process;cellular catabolic process;cellular keto…	(S)-3-amino-2-methylpropionate transaminase activity;4-aminobutyrate transaminase activity;binding;catalytic activity;cation binding;cofactor binding;enzyme binding;identical protein binding;ion binding;iron-sulfur cluster binding;metal cluster binding;metal ion binding;protein binding;protein dimerization activity;protein homodimerization activity;pyridoxal phosphate binding;succinate-semialdehy…	4-aminobutyrate transaminase complex;cell part;cell projection;cytoplasmic part;extracellular membrane-bounded organelle;extracellular organelle;extracellular region part;extracellular vesicular exosome;intracellular membrane-bounded organelle;intracellular organelle;intracellular organelle lumen;intracellular organelle part;intracellular part;macromolecular complex;membrane-bounded organelle;mem…	Alanine, aspartate and glutamate metabolism;beta-Alanine metabolism;Butanoate metabolism;Propanoate metabolism;Valine, leucine and isoleucine degradation	AFFAR_YY1_TARGETS_UP;BEHAVIOR;BLALOCK_ALZHEIMERS_DISEASE_DN;BROWNE_HCMV_INFECTION_18HR_UP;BROWNE_HCMV_INFECTION_20HR_UP;BROWNE_HCMV_INFECTION_24HR_UP;BROWNE_HCMV_INFECTION_4HR_UP;CAIRO_HEPATOBLASTOMA_DN;CHARAFE_BREAST_CANCER_LUMINAL_VS_MESENCHYMAL_UP;CHIANG_LIVER_CANCER_SUBCLASS_PROLIFERATION_DN;CHICAS_RB1_TARGETS_CONFLUENT;chr16p13;COFACTOR_BINDING;CREIGHTON_ENDOCRINE_THERAPY_RESISTANCE_1;CREIGH…	GO:0001505;GO:0001666;GO:0006082;GO:0006520;GO:0006807;GO:0006810;GO:0006836;GO:0006950;GO:0007154;GO:0007267;GO:0007268;GO:0007269;GO:0007610;GO:0007618;GO:0007620;GO:0007626;GO:0008152;GO:0008217;GO:0009056;GO:0009063;GO:0009308;GO:0009310;GO:0009448;GO:0009450;GO:0009987;GO:0010033;GO:0010035;GO:0010038;GO:0010039;GO:0014070;GO:0014073;GO:0016054;GO:0019752;GO:0022414;GO:0023052;GO:0023061;GO:…	GO:0003824;GO:0003867;GO:0005488;GO:0005515;GO:0008483;GO:0016740;GO:0016769;GO:0019842;GO:0019899;GO:0030170;GO:0032145;GO:0042802;GO:0042803;GO:0043167;GO:0043169;GO:0046872;GO:0046983;GO:0047298;GO:0048037;GO:0051536;GO:0051540;GO:0070279	GO:0005739;GO:0005759;GO:0031974;GO:0031982;GO:0031988;GO:0032144;GO:0032991;GO:0042995;GO:0043005;GO:0043226;GO:0043227;GO:0043229;GO:0043230;GO:0043231;GO:0043233;GO:0043234;GO:0044421;GO:0044422;GO:0044424;GO:0044429;GO:0044444;GO:0044446;GO:0044464;GO:0065010;GO:0070013;GO:0070062	REACT_23964		4	4	4	13.6	13.6	13.6	56.438	0.00043328	3.8602	41202000	14	23.0966	22.0493	22.4312	0.001	0.001	0.001	22.5363	20.5411	22.6319	19.1126	22.8503	0.001
	1.18446	0.885873		0.687166	-0.921129	ABCB7_HUMAN	ABCB7_HUMANATP-bindingcassettesub-familyBmember7,mitochondrial	O75027	ABCB7_HUMAN ATP-binding cassette sub-family B member 7, mitochondrial	ABCB7	ABCB7	COG5265		biological regulation;cation homeostasis;cellular cation homeostasis;cellular chemical homeostasis;cellular homeostasis;cellular ion homeostasis;cellular iron ion homeostasis;cellular metal ion homeostasis;cellular process;chemical homeostasis;cofactor transport;establishment of localization;heme transport;homeostatic process;ion homeostasis;iron ion homeostasis;metabolic process;metal ion homeos…	active transmembrane transporter activity;adenyl nucleotide binding;adenyl ribonucleotide binding;ATP binding;ATPase activity;ATPase activity, coupled;ATPase activity, coupled to movement of substances;ATPase activity, coupled to transmembrane movement of substances;binding;catalytic activity;cofactor transporter activity;heme transporter activity;hydrolase activity;hydrolase activity, acting on …	cell part;cytoplasmic part;integral to membrane;intracellular membrane-bounded organelle;intracellular organelle;intracellular organelle part;intracellular part;intrinsic to membrane;membrane;membrane part;membrane-bounded organelle;mitochondrial inner membrane;mitochondrial membrane;mitochondrial part;mitochondrion;organelle;organelle inner membrane;organelle membrane;organelle part	ABC transporters	ACATTCC,MIR-1,MIR-206;ACEVEDO_LIVER_TUMOR_VS_NORMAL_ADJACENT_TISSUE_DN;ACTIVE_TRANSMEMBRANE_TRANSPORTER_ACTIVITY;ADENYL_NUCLEOTIDE_BINDING;ADENYL_RIBONUCLEOTIDE_BINDING;ATP_BINDING;ATPASE_ACTIVITY;ATPASE_ACTIVITY_COUPLED;ATPASE_ACTIVITY_COUPLED_TO_MOVEMENT_OF_SUBSTANCES;BENPORATH_NANOG_TARGETS;BENPORATH_SOX2_TARGETS;BROWNE_HCMV_INFECTION_48HR_UP;CAGGTG_V$E12_Q6;chrxq12;COFACTOR_TRANSPORTER_ACTIVI…	GO:0006810;GO:0006873;GO:0006875;GO:0006879;GO:0008152;GO:0009987;GO:0015886;GO:0019725;GO:0030003;GO:0042592;GO:0044281;GO:0048878;GO:0050801;GO:0051181;GO:0051234;GO:0055065;GO:0055072;GO:0055080;GO:0055082;GO:0055085;GO:0065007;GO:0065008	GO:0000166;GO:0003824;GO:0005215;GO:0005488;GO:0005524;GO:0015232;GO:0015399;GO:0015405;GO:0016462;GO:0016787;GO:0016817;GO:0016818;GO:0016820;GO:0016887;GO:0017076;GO:0017111;GO:0022804;GO:0022857;GO:0030554;GO:0032553;GO:0032555;GO:0032559;GO:0035639;GO:0042623;GO:0042626;GO:0043492;GO:0051184	GO:0005739;GO:0005743;GO:0016020;GO:0016021;GO:0019866;GO:0031090;GO:0031224;GO:0031966;GO:0043226;GO:0043227;GO:0043229;GO:0043231;GO:0044422;GO:0044424;GO:0044425;GO:0044429;GO:0044444;GO:0044446;GO:0044464	REACT_111108;REACT_160176	SM00382	7	7	7	13.8	13.8	13.8	82.64	0	10.878	686220000	45	25.8222	25.1052	26.3048	25.3611	25.4778	24.9168	26.7124	26.5505	26.6269	25.3899	23.3687	24.2337
	1.80782	2.50139		0.533234	2.37253	MRP1_HUMAN	MRP1_HUMANMultidrugresistance-associatedprotein1	P33527	MRP1_HUMAN Multidrug resistance-associated protein 1	ABCC1	ABCC1	COG1132		arachidonic acid metabolic process;carboxylic acid metabolic process;cellular alkene metabolic process;cellular ketone metabolic process;cellular lipid metabolic process;cellular metabolic process;cellular process;cobalamin metabolic process;cofactor metabolic process;establishment of localization;fatty acid metabolic process;heterocycle metabolic process;icosanoid metabolic process;leukotriene m…	active transmembrane transporter activity;adenyl nucleotide binding;adenyl ribonucleotide binding;ATP binding;ATPase activity;ATPase activity, coupled;ATPase activity, coupled to movement of substances;ATPase activity, coupled to transmembrane movement of substances;binding;catalytic activity;hydrolase activity;hydrolase activity, acting on acid anhydrides;hydrolase activity, acting on acid anhyd…	basolateral plasma membrane;cell part;extracellular membrane-bounded organelle;extracellular organelle;extracellular region part;extracellular vesicular exosome;integral to membrane;integral to plasma membrane;intrinsic to membrane;intrinsic to plasma membrane;membrane;membrane part;membrane-bounded organelle;membrane-bounded vesicle;organelle;plasma membrane;plasma membrane part;vesicle	ABC transporters;Vitamin digestion and absorption	ACTGCCT,MIR-34B;ACTIVE_TRANSMEMBRANE_TRANSPORTER_ACTIVITY;ADENYL_NUCLEOTIDE_BINDING;ADENYL_RIBONUCLEOTIDE_BINDING;ATP_BINDING;ATPASE_ACTIVITY;ATPASE_ACTIVITY_COUPLED;ATPASE_ACTIVITY_COUPLED_TO_MOVEMENT_OF_SUBSTANCES;BROWNE_HCMV_INFECTION_14HR_DN;BROWNE_HCMV_INFECTION_24HR_DN;BROWNE_HCMV_INFECTION_2HR_DN;BRUINS_UVC_RESPONSE_VIA_TP53_GROUP_A;CELL_FRACTION;CHIANG_LIVER_CANCER_SUBCLASS_PROLIFERATION_…	GO:0000038;GO:0006082;GO:0006629;GO:0006631;GO:0006690;GO:0006691;GO:0006766;GO:0006767;GO:0006778;GO:0006807;GO:0006810;GO:0008152;GO:0009235;GO:0009987;GO:0019369;GO:0019752;GO:0032787;GO:0033013;GO:0033559;GO:0042180;GO:0042221;GO:0042493;GO:0043436;GO:0043449;GO:0044237;GO:0044238;GO:0044255;GO:0044281;GO:0046483;GO:0050896;GO:0051186;GO:0051234;GO:0055085	GO:0000166;GO:0003824;GO:0005215;GO:0005488;GO:0005524;GO:0015399;GO:0015405;GO:0016462;GO:0016787;GO:0016817;GO:0016818;GO:0016820;GO:0016887;GO:0017076;GO:0017111;GO:0022804;GO:0022857;GO:0030554;GO:0032553;GO:0032555;GO:0032559;GO:0035639;GO:0042623;GO:0042626;GO:0043492	GO:0005886;GO:0005887;GO:0016020;GO:0016021;GO:0016323;GO:0031224;GO:0031226;GO:0031982;GO:0031988;GO:0043226;GO:0043227;GO:0043230;GO:0044421;GO:0044425;GO:0044459;GO:0044464;GO:0065010;GO:0070062	REACT_150420;REACT_15480;REACT_163862	SM00382	8	8	8	8.6	8.6	8.6	171.59	0	9.864	1788400000	28	27.034	25.0663	26.7791	22.799	18.2698	24.7675	28.8266	28.7283	28.8286	24.8994	23.602	24.4526
	0.964988	17.7123		2.04738	4.01306	ABCD3_HUMAN	ABCD3_HUMANATP-bindingcassettesub-familyDmember3	P28288	ABCD3_HUMAN ATP-binding cassette sub-family D member 3	ABCD3	ABCD3	COG4178		carboxylic acid catabolic process;carboxylic acid metabolic process;catabolic process;cellular catabolic process;cellular component organization;cellular component organization at cellular level;cellular component organization or biogenesis;cellular component organization or biogenesis at cellular level;cellular ketone metabolic process;cellular lipid catabolic process;cellular lipid metabolic pr…	active transmembrane transporter activity;adenyl nucleotide binding;adenyl ribonucleotide binding;ATP binding;ATPase activity;ATPase activity, coupled;ATPase activity, coupled to movement of substances;ATPase activity, coupled to transmembrane movement of substances;binding;catalytic activity;hydrolase activity;hydrolase activity, acting on acid anhydrides;hydrolase activity, acting on acid anhyd…	cell part;cytoplasmic part;cytosol;integral to membrane;intracellular membrane-bounded organelle;intracellular organelle;intracellular organelle lumen;intracellular organelle part;intracellular part;intrinsic to membrane;membrane;membrane part;membrane-bounded organelle;membrane-enclosed lumen;microbody;microbody lumen;microbody membrane;microbody part;mitochondrial inner membrane;mitochondrial m…	ABC transporters;Peroxisome	ACTIVE_TRANSMEMBRANE_TRANSPORTER_ACTIVITY;AGTCAGC,MIR-345;ATPASE_ACTIVITY;ATPASE_ACTIVITY_COUPLED;ATPASE_ACTIVITY_COUPLED_TO_MOVEMENT_OF_SUBSTANCES;BLUM_RESPONSE_TO_SALIRASIB_DN;BRUINS_UVC_RESPONSE_EARLY_LATE;CHARAFE_BREAST_CANCER_LUMINAL_VS_BASAL_DN;chr1p22;CYTOPLASM;CYTOPLASMIC_PART;DIAZ_CHRONIC_MEYLOGENOUS_LEUKEMIA_UP;ENK_UV_RESPONSE_EPIDERMIS_DN;ESTABLISHMENT_OF_LOCALIZATION;FLECHNER_BIOPSY_K…	GO:0000038;GO:0006082;GO:0006629;GO:0006631;GO:0006635;GO:0006810;GO:0006996;GO:0007031;GO:0008152;GO:0009056;GO:0009062;GO:0009987;GO:0016042;GO:0016043;GO:0016054;GO:0019395;GO:0019752;GO:0030258;GO:0032787;GO:0034440;GO:0042180;GO:0042760;GO:0043436;GO:0044237;GO:0044238;GO:0044242;GO:0044248;GO:0044255;GO:0044281;GO:0044282;GO:0046395;GO:0051234;GO:0055085;GO:0055114;GO:0071840;GO:0071841;GO:…	GO:0000166;GO:0003824;GO:0005215;GO:0005488;GO:0005515;GO:0005524;GO:0015399;GO:0015405;GO:0016462;GO:0016787;GO:0016817;GO:0016818;GO:0016820;GO:0016887;GO:0017076;GO:0017111;GO:0022804;GO:0022857;GO:0030554;GO:0032553;GO:0032555;GO:0032559;GO:0035639;GO:0042623;GO:0042626;GO:0042802;GO:0042803;GO:0043492;GO:0046983	GO:0005743;GO:0005777;GO:0005778;GO:0005782;GO:0005829;GO:0016020;GO:0016021;GO:0019866;GO:0031090;GO:0031224;GO:0031903;GO:0031907;GO:0031966;GO:0031974;GO:0042579;GO:0043226;GO:0043227;GO:0043229;GO:0043231;GO:0043233;GO:0044422;GO:0044424;GO:0044425;GO:0044429;GO:0044438;GO:0044439;GO:0044444;GO:0044446;GO:0044464;GO:0070013	REACT_111158	SM00382	7	7	7	13.8	13.8	13.8	75.475	0	13.046	719390000	16	0.001	0.001	25.5534	23.4907	20.9436	21.5377	24.457	28.4162	25.819	26.3363	25.3064	26.3685
	2.77607	1.05597		1.11597	1.36916	ABCE1_HUMAN	ABCE1_HUMANATP-bindingcassettesub-familyEmember1	P61221	ABCE1_HUMAN ATP-binding cassette sub-family E member 1	ABCE1	ABCE1	COG1245		biological regulation;catabolic process;cellular catabolic process;cellular macromolecule catabolic process;cellular macromolecule metabolic process;cellular metabolic process;cellular nitrogen compound metabolic process;cellular process;establishment of localization;macromolecule catabolic process;macromolecule metabolic process;metabolic process;multi-organism process;negative regulation of cat…	adenyl nucleotide binding;adenyl ribonucleotide binding;ATP binding;ATPase activity;binding;catalytic activity;enzyme inhibitor activity;enzyme regulator activity;hydrolase activity;hydrolase activity, acting on acid anhydrides;hydrolase activity, acting on acid anhydrides, in phosphorus-containing anhydrides;iron-sulfur cluster binding;metal cluster binding;nucleoside-triphosphatase activity;nuc…	cell part;cytoplasm;cytoplasmic part;intracellular membrane-bounded organelle;intracellular organelle;intracellular organelle lumen;intracellular organelle part;intracellular part;membrane;membrane-bounded organelle;membrane-enclosed lumen;mitochondrial matrix;mitochondrial part;mitochondrion;organelle;organelle lumen;organelle part		AAGCCAT,MIR-135A,MIR-135B;BENPORATH_ES_1;BENPORATH_MYC_MAX_TARGETS;BERENJENO_TRANSFORMED_BY_RHOA_UP;BIOPOLYMER_CATABOLIC_PROCESS;BIOPOLYMER_METABOLIC_PROCESS;BLALOCK_ALZHEIMERS_DISEASE_DN;CAGCTG_V$AP4_Q5;CATABOLIC_PROCESS;CATTTCA,MIR-203;CCCACAT,MIR-299-3P;CELLULAR_CATABOLIC_PROCESS;CELLULAR_MACROMOLECULE_CATABOLIC_PROCESS;chr4q31;CTCTGGA,MIR-520A,MIR-525;CYTOPLASM;CYTOPLASMIC_PART;DACOSTA_UV_RES…	GO:0006139;GO:0006401;GO:0006807;GO:0006810;GO:0008152;GO:0009056;GO:0009057;GO:0009607;GO:0009615;GO:0009987;GO:0016032;GO:0016070;GO:0019222;GO:0034641;GO:0043086;GO:0043170;GO:0044092;GO:0044237;GO:0044238;GO:0044248;GO:0044260;GO:0044265;GO:0050789;GO:0050790;GO:0050896;GO:0051234;GO:0051704;GO:0051707;GO:0055085;GO:0065007;GO:0065009;GO:0090304	GO:0000166;GO:0003824;GO:0004857;GO:0005488;GO:0005524;GO:0008428;GO:0016462;GO:0016787;GO:0016817;GO:0016818;GO:0016887;GO:0017076;GO:0017111;GO:0030234;GO:0030554;GO:0032553;GO:0032555;GO:0032559;GO:0035639;GO:0051536;GO:0051540	GO:0005737;GO:0005739;GO:0005759;GO:0016020;GO:0031974;GO:0043226;GO:0043227;GO:0043229;GO:0043231;GO:0043233;GO:0044422;GO:0044424;GO:0044429;GO:0044444;GO:0044446;GO:0044464;GO:0070013	REACT_15480	SM00382	23	23	23	49.1	49.1	49.1	67.314	0	95.672	5932900000	312	28.6824	28.685	28.7124	28.4494	26.9536	26.5625	30.0275	29.5814	29.6388	28.7565	28.5976	28.7189
	1.45714	1.19512		1.03595	1.14084	ABCF1_HUMAN	ABCF1_HUMANATP-bindingcassettesub-familyFmember1	Q8NE71	ABCF1_HUMAN ATP-binding cassette sub-family F member 1	ABCF1	ABCF1	COG0488		biological regulation;biosynthetic process;cellular biosynthetic process;cellular macromolecule biosynthetic process;cellular macromolecule metabolic process;cellular metabolic process;cellular process;cellular protein metabolic process;defense response;establishment of localization;inflammatory response;macromolecule biosynthetic process;macromolecule metabolic process;metabolic process;positive…	adenyl nucleotide binding;adenyl ribonucleotide binding;ATP binding;ATPase activity;binding;catalytic activity;hydrolase activity;hydrolase activity, acting on acid anhydrides;hydrolase activity, acting on acid anhydrides, in phosphorus-containing anhydrides;nucleic acid binding;nucleoside-triphosphatase activity;nucleotide binding;purine nucleotide binding;purine ribonucleoside triphosphate bind…	cell part;cytoplasm;cytoplasmic part;cytosol;envelope;intracellular non-membrane-bounded organelle;intracellular organelle;intracellular organelle part;intracellular part;macromolecular complex;membrane;non-membrane-bounded organelle;nuclear envelope;nuclear part;nucleoplasm;organelle;organelle envelope;organelle part;polysomal ribosome;ribonucleoprotein complex;ribosome		ACTIVE_TRANSMEMBRANE_TRANSPORTER_ACTIVITY;ADENYL_NUCLEOTIDE_BINDING;ADENYL_RIBONUCLEOTIDE_BINDING;ATP_BINDING;ATPASE_ACTIVITY;ATPASE_ACTIVITY_COUPLED;ATPASE_ACTIVITY_COUPLED_TO_MOVEMENT_OF_SUBSTANCES;BIOSYNTHETIC_PROCESS;BURTON_ADIPOGENESIS_PEAK_AT_16HR;BYSTRYKH_HEMATOPOIESIS_STEM_CELL_QTL_TRANS;CELLULAR_BIOSYNTHETIC_PROCESS;CELLULAR_MACROMOLECULE_METABOLIC_PROCESS;CELLULAR_PROTEIN_METABOLIC_PROC…	GO:0006412;GO:0006413;GO:0006417;GO:0006810;GO:0006950;GO:0006952;GO:0006954;GO:0008152;GO:0009058;GO:0009059;GO:0009611;GO:0009889;GO:0009891;GO:0009893;GO:0009987;GO:0010468;GO:0010556;GO:0010557;GO:0010604;GO:0010608;GO:0019222;GO:0019538;GO:0031323;GO:0031325;GO:0031326;GO:0031328;GO:0032268;GO:0032270;GO:0034645;GO:0043170;GO:0044237;GO:0044238;GO:0044249;GO:0044260;GO:0044267;GO:0045727;GO:…	GO:0000166;GO:0003676;GO:0003723;GO:0003824;GO:0005488;GO:0005524;GO:0008135;GO:0008494;GO:0016462;GO:0016787;GO:0016817;GO:0016818;GO:0016887;GO:0017076;GO:0017111;GO:0030554;GO:0032553;GO:0032555;GO:0032559;GO:0035639;GO:0043021;GO:0043022;GO:0045182;GO:0090079	GO:0005635;GO:0005654;GO:0005737;GO:0005829;GO:0005840;GO:0016020;GO:0030529;GO:0031967;GO:0031975;GO:0032991;GO:0042788;GO:0043226;GO:0043228;GO:0043229;GO:0043232;GO:0044422;GO:0044424;GO:0044428;GO:0044444;GO:0044446;GO:0044464	REACT_15480	SM00382	37	37	36	47.6	47.6	46.2	95.925	0	323.31	5273400000	441	28.0594	28.5602	28.2853	28.3639	26.7494	27.2558	30.0977	28.8781	29.5144	28.3634	28.4318	28.9964
	3.34981	3.54963		2.49136	3.98191	ABCF2_HUMAN	ABCF2_HUMANATP-bindingcassettesub-familyFmember2	Q9UG63	ABCF2_HUMAN ATP-binding cassette sub-family F member 2	ABCF2	ABCF2	COG0488		establishment of localization;transport	adenyl nucleotide binding;adenyl ribonucleotide binding;ATP binding;ATPase activity;binding;catalytic activity;hydrolase activity;hydrolase activity, acting on acid anhydrides;hydrolase activity, acting on acid anhydrides, in phosphorus-containing anhydrides;nucleoside-triphosphatase activity;nucleotide binding;purine nucleotide binding;purine ribonucleoside triphosphate binding;purine ribonucleo…	ATP-binding cassette (ABC) transporter complex;cell part;cytoplasmic part;envelope;intracellular organelle part;intracellular part;macromolecular complex;membrane;membrane part;mitochondrial envelope;mitochondrial part;organelle envelope;organelle part;protein complex		AACTTT_UNKNOWN;ADENYL_NUCLEOTIDE_BINDING;ADENYL_RIBONUCLEOTIDE_BINDING;ALFANO_MYC_TARGETS;ATP_BINDING;BENPORATH_NANOG_TARGETS;BENPORATH_SOX2_TARGETS;BERENJENO_TRANSFORMED_BY_RHOA_UP;BURTON_ADIPOGENESIS_4;BURTON_ADIPOGENESIS_PEAK_AT_16HR;CAIRO_HEPATOBLASTOMA_CLASSES_UP;CASORELLI_ACUTE_PROMYELOCYTIC_LEUKEMIA_DN;CATTGTYY_V$SOX9_B1;chr7q35;CTTTGA_V$LEF1_Q2;CYTOPLASM;CYTOPLASMIC_PART;DIAZ_CHRONIC_MEYL…	GO:0006810;GO:0051234	GO:0000166;GO:0003824;GO:0005215;GO:0005488;GO:0005524;GO:0016462;GO:0016787;GO:0016817;GO:0016818;GO:0016887;GO:0017076;GO:0017111;GO:0030554;GO:0032553;GO:0032555;GO:0032559;GO:0035639	GO:0005740;GO:0016020;GO:0031967;GO:0031975;GO:0032991;GO:0043190;GO:0043234;GO:0044422;GO:0044424;GO:0044425;GO:0044429;GO:0044444;GO:0044446;GO:0044464		SM00382	24	24	24	40.6	40.6	40.6	71.289	0	53.369	4260200000	223	26.0611	26.4912	25.5453	25.9318	24.9004	23.8157	29.2137	29.8652	29.6676	29.1022	28.565	28.9264
	1.9949	2.10316		2.47982	3.55144	ABCF3_HUMAN	ABCF3_HUMANATP-bindingcassettesub-familyFmember3	Q9NUQ8	ABCF3_HUMAN ATP-binding cassette sub-family F member 3	ABCF3	ABCF3	COG0488		defense response;defense response to virus;immune effector process;immune system process;multi-organism process;response to biotic stimulus;response to other organism;response to stimulus;response to stress;response to virus	adenyl nucleotide binding;adenyl ribonucleotide binding;ATP binding;ATPase activity;binding;catalytic activity;hydrolase activity;hydrolase activity, acting on acid anhydrides;hydrolase activity, acting on acid anhydrides, in phosphorus-containing anhydrides;nucleoside-triphosphatase activity;nucleotide binding;purine nucleotide binding;purine ribonucleoside triphosphate binding;purine ribonucleo…	cell part;membrane		AMUNDSON_GENOTOXIC_SIGNATURE;BROWNE_HCMV_INFECTION_20HR_UP;CACTGCC,MIR-34A,MIR-34C,MIR-449;chr3q25;DACOSTA_UV_RESPONSE_VIA_ERCC3_UP;GATAAGR_V$GATA_C;GINESTIER_BREAST_CANCER_ZNF217_AMPLIFIED_DN;GSE13306_RA_VS_UNTREATED_TCONV_UP;GSE13484_UNSTIM_VS_12H_YF17D_VACCINE_STIM_PBMC_UP;GSE17721_12H_VS_24H_POLYIC_BMDM_DN;GSE17721_POLYIC_VS_CPG_1H_BMDM_DN;GSE20715_0H_VS_6H_OZONE_TLR4_KO_LUNG_DN;GSE22886_NAIV…	GO:0002252;GO:0002376;GO:0006950;GO:0006952;GO:0009607;GO:0009615;GO:0050896;GO:0051607;GO:0051704;GO:0051707	GO:0000166;GO:0003824;GO:0005488;GO:0005524;GO:0016462;GO:0016787;GO:0016817;GO:0016818;GO:0016887;GO:0017076;GO:0017111;GO:0030554;GO:0032553;GO:0032555;GO:0032559;GO:0035639	GO:0016020;GO:0044464		SM00382	16	16	16	31.5	31.5	31.5	79.744	0	58.372	1257300000	39	25.3447	25.6613	25.2698	24.5901	23.3705	22.7437	27.6172	26.7217	28.2464	26.79	27.2496	27.319
	0.35569	0.150712		0.0698586	0.0950623	ABHDA_HUMAN	ABHDA_HUMANMycophenolicacidacyl-glucuronideesterase,mitochondrial	Q9NUJ1	ABHDA_HUMAN Mycophenolic acid acyl-glucuronide esterase, mitochondrial	ABHD10	ABHD10	COG0596	3.1.1.93	carbohydrate catabolic process;carbohydrate metabolic process;catabolic process;cellular carbohydrate catabolic process;cellular carbohydrate metabolic process;cellular metabolic process;cellular process;glucuronoside catabolic process;glucuronoside metabolic process;metabolic process;primary metabolic process	catalytic activity;hydrolase activity;hydrolase activity, acting on glycosyl bonds;hydrolase activity, hydrolyzing O-glycosyl compounds	cell part;cytoplasmic part;cytosol;intracellular membrane-bounded organelle;intracellular organelle;intracellular part;membrane-bounded organelle;mitochondrion;organelle		ACEVEDO_LIVER_CANCER_DN;ACEVEDO_NORMAL_TISSUE_ADJACENT_TO_LIVER_TUMOR_DN;BENPORATH_CYCLING_GENES;chr3q13;GARGALOVIC_RESPONSE_TO_OXIDIZED_PHOSPHOLIPIDS_BLACK_DN;GOBERT_OLIGODENDROCYTE_DIFFERENTIATION_DN;GSE12845_IGD_POS_BLOOD_VS_NAIVE_TONSIL_BCELL_UP;GSE12845_IGD_POS_BLOOD_VS_PRE_GC_TONSIL_BCELL_UP;GSE13485_DAY1_VS_DAY21_YF17D_VACCINE_PBMC_DN;GSE14000_UNSTIM_VS_16H_LPS_DC_UP;GSE1460_INTRATHYMIC_T_…	GO:0005975;GO:0008152;GO:0009056;GO:0009987;GO:0016052;GO:0019389;GO:0019391;GO:0044237;GO:0044238;GO:0044262;GO:0044275	GO:0003824;GO:0004553;GO:0016787;GO:0016798	GO:0005739;GO:0005829;GO:0043226;GO:0043227;GO:0043229;GO:0043231;GO:0044424;GO:0044444;GO:0044464			16	16	16	56.9	56.9	56.9	33.932	0	118.92	2166100000	207	27.9714	27.7777	28.2598	26.8824	25.9786	25.2487	28.3474	27.9775	28.1362	26.0535	26.0994	26.2419
+	5.58104	-22.2844		0.0404465	1.17274	ABHDB_HUMAN	ABHDB_HUMANProteinABHD11	Q8NFV4	ABHDB_HUMAN Protein ABHD11	ABHD11	ABHD11	COG0596	3.-.-.-		catalytic activity;hydrolase activity	cell part;cytoplasmic part;intracellular membrane-bounded organelle;intracellular organelle;intracellular part;membrane-bounded organelle;mitochondrion;organelle		BENPORATH_NANOG_TARGETS;BENPORATH_SOX2_TARGETS;CHARAFE_BREAST_CANCER_LUMINAL_VS_BASAL_UP;CHARAFE_BREAST_CANCER_LUMINAL_VS_MESENCHYMAL_UP;CHEMNITZ_RESPONSE_TO_PROSTAGLANDIN_E2_DN;chr7q11;COLINA_TARGETS_OF_4EBP1_AND_4EBP2;CUI_TCF21_TARGETS_2_UP;FARMER_BREAST_CANCER_APOCRINE_VS_BASAL;GGATTA_V$PITX2_Q2;GGGCGGR_V$SP1_Q6;GRADE_COLON_CANCER_UP;GSE13484_12H_UNSTIM_VS_YF17D_VACCINE_STIM_PBMC_UP;GSE13738_T…		GO:0003824;GO:0016787	GO:0005739;GO:0043226;GO:0043227;GO:0043229;GO:0043231;GO:0044424;GO:0044444;GO:0044464			3	3	3	16.2	16.2	16.2	34.69	0.00043659	4.0572	24582000	5	22.5541	21.1851	23.1172	0.001	19.0879	0.001	0.001	0.001	0.001	22.6061	0.001	0.001
	0.532314	-0.581475	+	6.92672	-21.0299	ABD12_HUMAN	ABD12_HUMANLysophosphatidylserinelipaseABHD12	Q8N2K0	ABD12_HUMAN Lysophosphatidylserine lipase ABHD12	ABHD12	ABHD12	COG1073	3.1.1.23	acylglycerol catabolic process;acylglycerol metabolic process;adult behavior;adult locomotory behavior;adult walking behavior;behavior;catabolic process;cellular catabolic process;cellular lipid catabolic process;cellular lipid metabolic process;cellular metabolic process;cellular process;glycerol ether catabolic process;glycerol ether metabolic process;glycerolipid catabolic process;glycerolipid…	acylglycerol lipase activity;carboxylic ester hydrolase activity;catalytic activity;hydrolase activity;hydrolase activity, acting on ester bonds;lipase activity	alpha-amino-3-hydroxy-5-methyl-4-isoxazolepropionic acid selective glutamate receptor complex;cell part;integral to membrane;intrinsic to membrane;ionotropic glutamate receptor complex;macromolecular complex;membrane part;plasma membrane part;protein complex;receptor complex		CHARAFE_BREAST_CANCER_LUMINAL_VS_BASAL_UP;CHEN_METABOLIC_SYNDROM_NETWORK;CHICAS_RB1_TARGETS_CONFLUENT;chr20p11;GOBERT_OLIGODENDROCYTE_DIFFERENTIATION_DN;GSE10463_CD40L_AND_VA347_VS_CD40L_IN_DC_UP;GSE11924_TFH_VS_TH17_CD4_TCELL_UP;GSE12366_GC_BCELL_VS_PLASMA_CELL_DN;GSE12366_PLASMA_CELL_VS_MEMORY_BCELL_UP;GSE15750_WT_VS_TRAF6KO_DAY6_EFF_CD8_TCELL_UP;GSE2706_2H_VS_8H_R848_AND_LPS_STIM_DC_UP;GSE2778…	GO:0006629;GO:0006638;GO:0006639;GO:0006644;GO:0006650;GO:0006658;GO:0006660;GO:0006662;GO:0007610;GO:0007626;GO:0007628;GO:0008152;GO:0008344;GO:0009056;GO:0009395;GO:0009605;GO:0009612;GO:0009628;GO:0009987;GO:0010996;GO:0016042;GO:0018904;GO:0019637;GO:0030534;GO:0032501;GO:0044237;GO:0044238;GO:0044242;GO:0044248;GO:0044255;GO:0044269;GO:0044281;GO:0046461;GO:0046464;GO:0046475;GO:0046486;GO:…	GO:0003824;GO:0016298;GO:0016787;GO:0016788;GO:0047372;GO:0052689	GO:0008328;GO:0016021;GO:0031224;GO:0032281;GO:0032991;GO:0043234;GO:0043235;GO:0044425;GO:0044459;GO:0044464			5	5	5	19.8	19.8	19.8	45.096	0	11.726	68810000	16	22.9472	23.4934	24.0264	20.5597	21.1252	21.4077	23.5913	22.7963	22.335	0.001	0.001	0.001
	1.99874	0.627186		0.130868	0.271042	ABHEB_HUMAN	ABHEB_HUMANProteinABHD14B	Q96IU4	ABHEB_HUMAN Protein ABHD14B	ABHD14B	ABHD14B	COG0596	3.-.-.-	biological regulation;metabolic process;positive regulation of biological process;positive regulation of biosynthetic process;positive regulation of cellular biosynthetic process;positive regulation of cellular metabolic process;positive regulation of cellular process;positive regulation of gene expression;positive regulation of macromolecule biosynthetic process;positive regulation of macromolec…	catalytic activity;hydrolase activity	cell part;cytoplasm;cytoplasmic part;cytosol;extracellular membrane-bounded organelle;extracellular organelle;extracellular region part;extracellular vesicular exosome;intracellular membrane-bounded organelle;intracellular non-membrane-bounded organelle;intracellular organelle;intracellular organelle part;intracellular part;membrane-bounded organelle;membrane-bounded vesicle;non-membrane-bounded …		ACEVEDO_NORMAL_TISSUE_ADJACENT_TO_LIVER_TUMOR_DN;BHATI_G2M_ARREST_BY_2METHOXYESTRADIOL_DN;chr3p21;DARWICHE_PAPILLOMA_PROGRESSION_RISK;DARWICHE_PAPILLOMA_RISK_HIGH_DN;DARWICHE_PAPILLOMA_RISK_LOW_DN;DARWICHE_SKIN_TUMOR_PROMOTER_DN;DARWICHE_SQUAMOUS_CELL_CARCINOMA_DN;DODD_NASOPHARYNGEAL_CARCINOMA_UP;GSE11864_UNTREATED_VS_CSF1_IFNG_PAM3CYS_IN_MAC_UP;GSE11864_UNTREATED_VS_CSF1_IN_MAC_UP;GSE14000_4H_VS…	GO:0006355;GO:0006357;GO:0008152;GO:0009889;GO:0009891;GO:0009893;GO:0010468;GO:0010556;GO:0010557;GO:0010604;GO:0010628;GO:0019219;GO:0019222;GO:0031323;GO:0031325;GO:0031326;GO:0031328;GO:0045893;GO:0045935;GO:0045944;GO:0048518;GO:0048522;GO:0050789;GO:0050794;GO:0051171;GO:0051173;GO:0051252;GO:0051254;GO:0060255;GO:0065007;GO:0080090;GO:2000112	GO:0003824;GO:0016787	GO:0005634;GO:0005730;GO:0005737;GO:0005829;GO:0031982;GO:0031988;GO:0043226;GO:0043227;GO:0043228;GO:0043229;GO:0043230;GO:0043231;GO:0043232;GO:0044421;GO:0044422;GO:0044424;GO:0044428;GO:0044444;GO:0044446;GO:0044464;GO:0065010;GO:0070062			9	9	9	60	60	60	22.345	0	139.23	12492000000	427	30.129	30.2363	30.2366	29.9438	28.0882	27.6582	31.0081	30.5717	30.9036	29.2437	29.0014	28.2581
	0	0		0.931751	-14.5774	ABHGA_HUMAN	ABHGA_HUMANPhosphatidylserinelipaseABHD16A	O95870	ABHGA_HUMAN Phosphatidylserine lipase ABHD16A	ABHD16A	ABHD16A	COG1073	3.-.-.-		catalytic activity;hydrolase activity	cell part;integral to membrane;intrinsic to membrane;membrane part		ACEVEDO_LIVER_CANCER_UP;ACEVEDO_LIVER_TUMOR_VS_NORMAL_ADJACENT_TISSUE_UP;CACGTTT,MIR-302A;CAGCTG_V$AP4_Q5;chr6p21;CUI_TCF21_TARGETS_2_UP;GCM_CHUK;GCM_DENR;GCM_GSPT1;GCM_ING1;GCM_MLL;GCM_NF2;GCM_NUMA1;GCM_TINF2;GCM_UBE2N;GGGCGGR_V$SP1_Q6;GSE14350_IL2RB_KO_VS_WT_TEFF_DN;GSE16522_ANTI_CD3CD28_STIM_VS_UNSTIM_MEMORY_CD8_TCELL_DN;GSE17721_CTRL_VS_CPG_24H_BMDM_UP;GSE17721_LPS_VS_GARDIQUIMOD_16H_BMDM_UP;…		GO:0003824;GO:0016787	GO:0016021;GO:0031224;GO:0044425;GO:0044464			2	2	2	4.7	4.7	4.7	63.243	0.0091586	1.8055	9729700	0	0.001	0.001	0.001	22.908	20.8262	0.001	0.001	0.001	0.001	0.001	0.001	0.001
	0.222419	0.103103		0.920329	-1.50292	ABI1_HUMAN	ABI1_HUMANAblinteractor1	Q8IZP0	ABI1_HUMAN Abl interactor 1	ABI1	ABI1	NOG262939		actin cytoskeleton organization;actin filament organization;actin filament-based process;actin polymerization or depolymerization;anatomical structure development;anatomical structure formation involved in morphogenesis;anatomical structure morphogenesis;anterior/posterior pattern specification;biological regulation;cell development;cell part morphogenesis;cell projection morphogenesis;cell proje…	binding;cytoskeletal protein binding;enzyme activator activity;enzyme regulator activity;kinase activator activity;kinase regulator activity;protein binding;protein complex binding;protein kinase activator activity;protein kinase regulator activity;protein tyrosine kinase activator activity	cell junction;cell part;cell projection;cell projection part;cytoplasmic part;cytoskeletal part;cytoskeleton;cytosol;endoplasmic reticulum;extracellular membrane-bounded organelle;extracellular organelle;extracellular region part;extracellular vesicular exosome;filopodium;growth cone;intracellular;intracellular membrane-bounded organelle;intracellular non-membrane-bounded organelle;intracellular …		BAELDE_DIABETIC_NEPHROPATHY_DN;BIOPOLYMER_METABOLIC_PROCESS;BIOPOLYMER_MODIFICATION;BUYTAERT_PHOTODYNAMIC_THERAPY_STRESS_UP;CELL_FRACTION;CELL_PROJECTION;CELL_PROLIFERATION_GO_0008283;CELL_SURFACE_RECEPTOR_LINKED_SIGNAL_TRANSDUCTION_GO_0007166;CELLULAR_MACROMOLECULE_METABOLIC_PROCESS;CELLULAR_PROTEIN_METABOLIC_PROCESS;CHANG_POU5F1_TARGETS_UP;chr10p11;CTGYNNCTYTAA_UNKNOWN;CTTTGT_V$LEF1_Q2;CYTOPLAS…	GO:0001756;GO:0002376;GO:0003002;GO:0006464;GO:0006468;GO:0006793;GO:0006796;GO:0006928;GO:0006950;GO:0006952;GO:0006955;GO:0006996;GO:0007010;GO:0007015;GO:0007165;GO:0007166;GO:0007167;GO:0007169;GO:0007264;GO:0007389;GO:0008152;GO:0008154;GO:0008285;GO:0009653;GO:0009952;GO:0009987;GO:0010033;GO:0016032;GO:0016043;GO:0016310;GO:0018108;GO:0018193;GO:0018212;GO:0019538;GO:0030029;GO:0030030;GO:…	GO:0005488;GO:0005515;GO:0008047;GO:0008092;GO:0019207;GO:0019209;GO:0019887;GO:0030234;GO:0030295;GO:0030296;GO:0032403	GO:0005622;GO:0005634;GO:0005783;GO:0005829;GO:0005856;GO:0014069;GO:0016020;GO:0030027;GO:0030054;GO:0030175;GO:0030426;GO:0030427;GO:0031209;GO:0031982;GO:0031988;GO:0032991;GO:0042995;GO:0043226;GO:0043227;GO:0043228;GO:0043229;GO:0043230;GO:0043231;GO:0043232;GO:0043234;GO:0044421;GO:0044422;GO:0044424;GO:0044430;GO:0044444;GO:0044446;GO:0044456;GO:0044463;GO:0044464;GO:0045211;GO:0065010;GO:…	REACT_160086;REACT_264464;REACT_355372	SM00326	14	14	9	26.2	26.2	20.5	55.08	0	50.738	1433000000	93	27.4994	27.5333	27.3639	26.9093	25.2464	25.1384	27.8598	27.5861	27.2601	24.3493	23.3495	25.0866
	0.490068	-1.33436		0.907827	1.67538	ABI3_HUMAN	ABI3_HUMANABIgenefamilymember3	Q9P2A4	ABI3_HUMAN ABI gene family member 3	ABI3	ABI3	NOG328966		biological regulation;cellular component movement;cellular process;regulation of biological process;regulation of cell migration;regulation of cell motility;regulation of cellular component movement;regulation of cellular process;regulation of localization;regulation of locomotion		cell part;cell projection;cytoplasm;intracellular;intracellular part;lamellipodium;membrane		BENPORATH_MYC_MAX_TARGETS;BIOPOLYMER_METABOLIC_PROCESS;BIOPOLYMER_MODIFICATION;CCCNNGGGAR_V$OLF1_01;CELL_MIGRATION;CELL_PROJECTION;CELLULAR_MACROMOLECULE_METABOLIC_PROCESS;CELLULAR_PROTEIN_METABOLIC_PROCESS;CHEN_METABOLIC_SYNDROM_NETWORK;chr17q21;DANG_BOUND_BY_MYC;FIGUEROA_AML_METHYLATION_CLUSTER_4_DN;GATTGGY_V$NFY_Q6_01;GGGAGGRR_V$MAZ_Q6;GGGTGGRR_V$PAX4_03;GSE13306_TREG_VS_TCONV_LAMINA_PROPRIA_D…	GO:0006928;GO:0009987;GO:0030334;GO:0032879;GO:0040012;GO:0050789;GO:0050794;GO:0051270;GO:0065007;GO:2000145		GO:0005622;GO:0005737;GO:0016020;GO:0030027;GO:0042995;GO:0044424;GO:0044464		SM00326	9	9	9	29.5	29.5	29.5	39.035	0	23.273	339610000	37	25.5499	25.3095	25.0099	24.7261	22.4919	22.1799	25.8772	24.1684	21.8207	24.3309	24.6914	25.4018
	2.02588	-0.924408		2.12511	-2.63916	ABLM1_HUMAN	ABLM1_HUMANActin-bindingLIMprotein1	O14639	ABLM1_HUMAN Actin-binding LIM protein 1	ABLIM1	ABLIM1	NOG302299		anatomical structure formation involved in morphogenesis;anatomical structure morphogenesis;axon guidance;biological regulation;cell projection assembly;cell projection organization;cellular component assembly;cellular component assembly at cellular level;cellular component assembly involved in morphogenesis;cellular component organization;cellular component organization at cellular level;cellula…	actin binding;binding;cation binding;cytoskeletal protein binding;ion binding;metal ion binding;protein binding;transition metal ion binding;zinc ion binding	actin cytoskeleton;actin filament bundle;actomyosin;cell part;cell projection;cytoplasm;cytoskeletal part;cytoskeleton;intracellular non-membrane-bounded organelle;intracellular organelle;intracellular organelle part;intracellular part;lamellipodium;non-membrane-bounded organelle;organelle;organelle part;stress fiber	Axon guidance	ACTIN_BINDING;ACTIN_CYTOSKELETON;ANATOMICAL_STRUCTURE_DEVELOPMENT;ANATOMICAL_STRUCTURE_MORPHOGENESIS;BENPORATH_SOX2_TARGETS;BERENJENO_TRANSFORMED_BY_RHOA_DN;BLALOCK_ALZHEIMERS_DISEASE_UP;BRACHAT_RESPONSE_TO_CISPLATIN;BRACHAT_RESPONSE_TO_METHOTREXATE_UP;BROWNE_HCMV_INFECTION_24HR_UP;BRUECKNER_TARGETS_OF_MIRLET7A3_UP;CAGCTG_V$AP4_Q5;CAMP_UP.V1_DN;CASORELLI_ACUTE_PROMYELOCYTIC_LEUKEMIA_DN;CHEOK_RESP…	GO:0003008;GO:0006355;GO:0006357;GO:0006935;GO:0006996;GO:0007010;GO:0007411;GO:0007600;GO:0007601;GO:0009605;GO:0009653;GO:0009887;GO:0009889;GO:0009891;GO:0009893;GO:0009987;GO:0010468;GO:0010556;GO:0010557;GO:0010604;GO:0010628;GO:0010927;GO:0016043;GO:0019219;GO:0019222;GO:0022607;GO:0030030;GO:0030031;GO:0030032;GO:0031323;GO:0031325;GO:0031326;GO:0031328;GO:0032501;GO:0032502;GO:0040011;GO:…	GO:0003779;GO:0005488;GO:0005515;GO:0008092;GO:0008270;GO:0043167;GO:0043169;GO:0046872;GO:0046914	GO:0001725;GO:0005737;GO:0005856;GO:0015629;GO:0030027;GO:0032432;GO:0042641;GO:0042995;GO:0043226;GO:0043228;GO:0043229;GO:0043232;GO:0044422;GO:0044424;GO:0044430;GO:0044446;GO:0044464	REACT_22351	SM00132;SM00153	24	24	24	32.6	32.6	32.6	87.687	0	85.6	1455700000	143	27.8011	27.8941	27.9879	27.0966	25.7818	25.9144	27.2505	26.6081	27.0512	23.0449	23.6706	24.1598
	0.488022	-1.09428		0.574477	1.12009	ABR_HUMAN	ABR_HUMANActivebreakpointclusterregion-relatedprotein	Q12979	ABR_HUMAN Active breakpoint cluster region-related protein	ABR	ABR	NOG267747		actin cytoskeleton organization;actin filament-based process;anatomical structure development;anatomical structure morphogenesis;biological regulation;brain development;cell surface receptor linked signaling pathway;cellular component organization;cellular component organization at cellular level;cellular component organization or biogenesis;cellular component organization or biogenesis at cellul…	enzyme activator activity;enzyme regulator activity;GTPase activator activity;GTPase regulator activity;guanyl-nucleotide exchange factor activity;nucleoside-triphosphatase regulator activity;Ras guanyl-nucleotide exchange factor activity;Rho guanyl-nucleotide exchange factor activity;small GTPase regulator activity	cell part;cytoplasmic part;cytosol;intracellular part;membrane;plasma membrane		AACTGGA,MIR-145;AACWWCAANK_UNKNOWN;AAGCACT,MIR-520F;ACAWYAAAG_UNKNOWN;ACCTGTTG_UNKNOWN;ATGTTAA,MIR-302C;CACTGCC,MIR-34A,MIR-34C,MIR-449;CAGCAGG,MIR-370;CAGCTG_V$AP4_Q5;CAGGTG_V$E12_Q6;CCCNNGGGAR_V$OLF1_01;CHEN_METABOLIC_SYNDROM_NETWORK;chr17p13;CTCAGGG,MIR-125B,MIR-125A;CTCNANGTGNY_UNKNOWN;CTTTGA_V$LEF1_Q2;DEBIASI_APOPTOSIS_BY_REOVIRUS_INFECTION_DN;DELYS_THYROID_CANCER_UP;ENK_UV_RESPONSE_EPIDERMI…	GO:0002237;GO:0002682;GO:0002683;GO:0002694;GO:0002695;GO:0002697;GO:0002698;GO:0002703;GO:0002886;GO:0003008;GO:0006140;GO:0006996;GO:0007010;GO:0007165;GO:0007166;GO:0007167;GO:0007169;GO:0007264;GO:0007420;GO:0009607;GO:0009653;GO:0009894;GO:0009966;GO:0009987;GO:0010033;GO:0010941;GO:0010942;GO:0016043;GO:0017157;GO:0019219;GO:0019222;GO:0023051;GO:0030029;GO:0030036;GO:0030100;GO:0030334;GO:…	GO:0005083;GO:0005085;GO:0005088;GO:0005089;GO:0005096;GO:0008047;GO:0030234;GO:0030695;GO:0060589	GO:0005829;GO:0005886;GO:0016020;GO:0044424;GO:0044444;GO:0044464	REACT_11051;REACT_13638;REACT_18407	SM00233;SM00239;SM00324;SM00325	13	11	11	25.5	23.3	23.3	97.597	0	19.993	172350000	30	24.1578	23.7817	24.4874	23.2554	23.2427	21.5203	22.6842	21.6066	24.8532	23.9101	22.6148	24.8537
	1.67989	1.46493		1.68749	3.41141	ABRAL_HUMAN	ABRAL_HUMANCostarsfamilyproteinABRACL	Q9P1F3	ABRAL_HUMAN Costars family protein ABRACL	ABRACL	ABRACL	NOG239095												6	6	6	77.8	77.8	77.8	9.0564	0	159.82	23064000000	438	30.4553	30.4039	30.4255	29.0036	26.4875	26.1999	31.1967	32.568	31.9147	30.9818	30.2232	30.7203
	1.06707	-0.781219		0.216889	-0.227982	ABRX1_HUMAN	ABRX1_HUMANBRCA1-AcomplexsubunitAbraxas1	Q6UWZ7	ABRX1_HUMAN BRCA1-A complex subunit Abraxas 1	ABRAXAS1	FAM175A	NOG44678		biological regulation;cell cycle checkpoint;cellular component organization;cellular component organization at cellular level;cellular component organization or biogenesis;cellular component organization or biogenesis at cellular level;cellular macromolecule metabolic process;cellular metabolic process;cellular nitrogen compound metabolic process;cellular process;cellular response to stimulus;cel…	binding;polyubiquitin binding;protein binding;small conjugating protein binding;ubiquitin binding	BRCA1-A complex;cell part;intracellular membrane-bounded organelle;intracellular organelle;intracellular organelle part;intracellular part;macromolecular complex;membrane-bounded organelle;nuclear part;nucleus;organelle;organelle part;protein complex		ATTCTTT,MIR-186;BASAKI_YBX1_TARGETS_DN;BRUINS_UVC_RESPONSE_EARLY_LATE;chr4q21;CTTGTAT,MIR-381;CTTTAAR_UNKNOWN;GSE10239_KLRG1INT_VS_KLRG1HIGH_EFF_CD8_TCELL_DN;GSE11864_UNTREATED_VS_CSF1_IFNG_PAM3CYS_IN_MAC_UP;GSE17974_1.5H_VS_72H_IL4_AND_ANTI_IL12_ACT_CD4_TCELL_DN;GSE27786_CD8_TCELL_VS_NKTCELL_UP;GSE27786_LSK_VS_MONO_MAC_UP;GSE27786_NKCELL_VS_ERYTHROBLAST_DN;GSE27786_NKTCELL_VS_ERYTHROBLAST_DN;GSE…	GO:0000075;GO:0000077;GO:0006139;GO:0006259;GO:0006281;GO:0006282;GO:0006302;GO:0006325;GO:0006807;GO:0006950;GO:0006974;GO:0006996;GO:0008152;GO:0009314;GO:0009628;GO:0009893;GO:0009987;GO:0010212;GO:0010564;GO:0010604;GO:0016043;GO:0016568;GO:0019219;GO:0019222;GO:0031323;GO:0031325;GO:0031570;GO:0031572;GO:0031576;GO:0033554;GO:0034641;GO:0043170;GO:0044237;GO:0044238;GO:0044260;GO:0045739;GO:…	GO:0005488;GO:0005515;GO:0031593;GO:0032182;GO:0043130	GO:0005634;GO:0032991;GO:0043226;GO:0043227;GO:0043229;GO:0043231;GO:0043234;GO:0044422;GO:0044424;GO:0044428;GO:0044446;GO:0044464;GO:0070531			6	6	6	19.1	19.1	19.1	46.662	0	10.113	82872000	20	23.5862	22.9763	24.0768	22.0382	21.868	21.836	22.5858	23.0196	22.6904	20.9158	22.283	21.8594
	1.82864	0.770294		0.513734	-1.00941	ABRX2_HUMAN	ABRX2_HUMANBRISCcomplexsubunitAbraxas2	Q15018	ABRX2_HUMAN BRISC complex subunit Abraxas 2	ABRAXAS2	FAM175B	NOG44678		cellular process;cellular response to cold;cellular response to freezing;cellular response to stimulus;cellular response to stress;response to abiotic stimulus;response to cold;response to freezing;response to stimulus;response to stress;response to temperature stimulus	binding;polyubiquitin binding;protein binding;small conjugating protein binding;ubiquitin binding	BRISC complex;cell part;cytoplasm;intracellular organelle part;intracellular part;macromolecular complex;nuclear part;organelle part;protein complex		AAACCAC,MIR-140;AAAGGGA,MIR-204,MIR-211;AATGTGA,MIR-23A,MIR-23B;ACTGAAA,MIR-30A-3P,MIR-30E-3P;CCAWNWWNNNGGC_UNKNOWN;CHEOK_RESPONSE_TO_HD_MTX_DN;chr10q26;CTACTAG,MIR-325;DEBIASI_APOPTOSIS_BY_REOVIRUS_INFECTION_UP;GCM_BNIP1;GGARNTKYCCA_UNKNOWN;GGCNKCCATNK_UNKNOWN;GGGATGC,MIR-324-5P;GSE10239_KLRG1INT_VS_KLRG1HIGH_EFF_CD8_TCELL_DN;GSE11924_TFH_VS_TH2_CD4_TCELL_UP;GSE11924_TH2_VS_TH17_CD4_TCELL_UP;GSE…	GO:0006950;GO:0009266;GO:0009409;GO:0009628;GO:0009987;GO:0033554;GO:0050826;GO:0050896;GO:0051716;GO:0070417;GO:0071497	GO:0005488;GO:0005515;GO:0031593;GO:0032182;GO:0043130	GO:0005737;GO:0032991;GO:0043234;GO:0044422;GO:0044424;GO:0044428;GO:0044446;GO:0044464;GO:0070552			16	16	16	48.7	48.7	48.7	46.9	0	62.317	683680000	74	25.6367	25.9232	26.1555	26.2795	24.8152	23.4677	26.8997	26.5389	26.5878	23.8711	24.3303	23.3328
	0.144381	-0.942764		0.150436	0.367384	ABT1_HUMAN	ABT1_HUMANActivatorofbasaltranscription1	Q9ULW3	ABT1_HUMAN Activator of basal transcription 1	ABT1	ABT1	NOG332037		biological regulation;biosynthetic process;cell differentiation;cell differentiation in spinal cord;cellular biosynthetic process;cellular component assembly;cellular component assembly at cellular level;cellular component organization;cellular component organization at cellular level;cellular component organization or biogenesis;cellular component organization or biogenesis at cellular level;cel…	binding;DNA binding;nucleic acid binding;nucleotide binding;protein binding transcription factor activity;transcription coactivator activity;transcription cofactor activity;transcription factor binding transcription factor activity	cell part;intracellular membrane-bounded organelle;intracellular non-membrane-bounded organelle;intracellular organelle;intracellular organelle part;intracellular part;macromolecular complex;membrane-bounded organelle;non-membrane-bounded organelle;nuclear part;nucleolus;nucleoplasm part;nucleus;organelle;organelle part;protein complex;transcription factor complex		AAAYRNCTG_UNKNOWN;AMUNDSON_POOR_SURVIVAL_AFTER_GAMMA_RADIATION_2G;BENPORATH_MYC_MAX_TARGETS;BIOPOLYMER_METABOLIC_PROCESS;chr6p21;DANG_BOUND_BY_MYC;GARY_CD5_TARGETS_DN;GCM_MAX;GENERAL_RNA_POLYMERASE_II_TRANSCRIPTION_FACTOR_ACTIVITY;GNF2_HDAC1;GSE11864_CSF1_VS_CSF1_IFNG_IN_MAC_DN;GSE12845_PRE_GC_VS_DARKZONE_GC_TONSIL_BCELL_DN;GSE14308_TH1_VS_NATURAL_TREG_UP;GSE14308_TH17_VS_NAIVE_CD4_TCELL_UP;GSE15…	GO:0000447;GO:0000469;GO:0000472;GO:0000478;GO:0000479;GO:0000480;GO:0000966;GO:0000967;GO:0006139;GO:0006351;GO:0006355;GO:0006357;GO:0006366;GO:0006396;GO:0006807;GO:0008152;GO:0009058;GO:0009059;GO:0009889;GO:0009987;GO:0010468;GO:0010556;GO:0016043;GO:0016070;GO:0019219;GO:0019222;GO:0021515;GO:0021522;GO:0021953;GO:0022607;GO:0022618;GO:0030154;GO:0030182;GO:0031323;GO:0031326;GO:0032502;GO:…	GO:0000166;GO:0000988;GO:0000989;GO:0003676;GO:0003677;GO:0003712;GO:0003713;GO:0005488	GO:0005634;GO:0005667;GO:0005730;GO:0032991;GO:0043226;GO:0043227;GO:0043228;GO:0043229;GO:0043231;GO:0043232;GO:0043234;GO:0044422;GO:0044424;GO:0044428;GO:0044446;GO:0044451;GO:0044464			7	7	7	37.1	37.1	37.1	31.079	0	37.747	157160000	14	20.4565	25.3883	25.0903	22.4823	19.9715	22.5982	24.706	24.3408	19.06	21.7213	21.7661	22.6668
	1.37997	0.576335		0.498185	1.1931	THIK_HUMAN	THIK_HUMAN3-ketoacyl-CoAthiolase,peroxisomal	P09110	THIK_HUMAN 3-ketoacyl-CoA thiolase, peroxisomal	ACAA1	ACAA1	COG0183	2.3.1.16	bile acid metabolic process;carboxylic acid catabolic process;carboxylic acid metabolic process;catabolic process;cellular catabolic process;cellular ketone metabolic process;cellular lipid catabolic process;cellular lipid metabolic process;cellular metabolic process;cellular process;fatty acid beta-oxidation;fatty acid beta-oxidation using acyl-CoA oxidase;fatty acid catabolic process;fatty acid…	acetyl-CoA C-acyltransferase activity;acyl-CoA oxidase activity;C-acyltransferase activity;catalytic activity;oxidoreductase activity;oxidoreductase activity, acting on the CH-CH group of donors;oxidoreductase activity, acting on the CH-CH group of donors, oxygen as acceptor;palmitoyl-CoA oxidase activity;transferase activity;transferase activity, transferring acyl groups;transferase activity, tr…	cell part;cytoplasmic part;intracellular membrane-bounded organelle;intracellular organelle;intracellular organelle lumen;intracellular organelle part;intracellular part;membrane;membrane-bounded organelle;membrane-enclosed lumen;microbody;microbody lumen;microbody part;organelle;organelle lumen;organelle part;peroxisomal matrix;peroxisomal part;peroxisome	Benzoate degradation;Biosynthesis of unsaturated fatty acids;Fatty acid metabolism;Peroxisome;PPAR signaling pathway;Valine, leucine and isoleucine degradation	ACEVEDO_LIVER_CANCER_DN;ACEVEDO_LIVER_TUMOR_VS_NORMAL_ADJACENT_TISSUE_DN;BLALOCK_ALZHEIMERS_DISEASE_UP;BOCHKIS_FOXA2_TARGETS;BOYAULT_LIVER_CANCER_SUBCLASS_G123_DN;BROWNE_HCMV_INFECTION_20HR_DN;BROWNE_HCMV_INFECTION_4HR_DN;BYSTRYKH_HEMATOPOIESIS_STEM_CELL_AND_BRAIN_QTL_CIS;CAIRO_HEPATOBLASTOMA_DN;CHESLER_BRAIN_HIGHEST_GENETIC_VARIANCE;CHESLER_BRAIN_QTL_CIS;chr3p23;CREIGHTON_ENDOCRINE_THERAPY_RESIS…	GO:0000038;GO:0006082;GO:0006629;GO:0006631;GO:0006635;GO:0008152;GO:0008202;GO:0008206;GO:0009056;GO:0009062;GO:0009987;GO:0016042;GO:0016054;GO:0019395;GO:0019752;GO:0030258;GO:0032787;GO:0033540;GO:0033559;GO:0034440;GO:0042180;GO:0043436;GO:0044237;GO:0044238;GO:0044242;GO:0044248;GO:0044255;GO:0044281;GO:0044282;GO:0046395;GO:0055114;GO:0072329	GO:0003824;GO:0003988;GO:0003997;GO:0016401;GO:0016408;GO:0016491;GO:0016627;GO:0016634;GO:0016740;GO:0016746;GO:0016747	GO:0005777;GO:0005782;GO:0016020;GO:0031907;GO:0031974;GO:0042579;GO:0043226;GO:0043227;GO:0043229;GO:0043231;GO:0043233;GO:0044422;GO:0044424;GO:0044438;GO:0044439;GO:0044444;GO:0044446;GO:0044464;GO:0070013	REACT_121147;REACT_17062		11	11	11	40.1	40.1	40.1	44.292	0	57.489	757520000	101	26.3767	26.3501	25.9282	25.1305	23.1488	22.7545	26.9669	26.5399	26.8772	26.0053	23.4707	25.1372
	1.60926	1.1602		0.420918	0.412642	THIM_HUMAN	THIM_HUMAN3-ketoacyl-CoAthiolase,mitochondrial	P42765	THIM_HUMAN 3-ketoacyl-CoA thiolase, mitochondrial	ACAA2	ACAA2	COG0183	2.3.1.16	alcohol metabolic process;biosynthetic process;carboxylic acid metabolic process;cellular ketone metabolic process;cellular lipid metabolic process;cellular metabolic process;cellular process;cellular response to chemical stimulus;cellular response to hypoxia;cellular response to oxygen levels;cellular response to stimulus;cellular response to stress;cholesterol biosynthetic process;cholesterol m…	acetyl-CoA C-acyltransferase activity;C-acyltransferase activity;catalytic activity;transferase activity;transferase activity, transferring acyl groups;transferase activity, transferring acyl groups other than amino-acyl groups	cell part;cytoplasmic part;extracellular membrane-bounded organelle;extracellular organelle;extracellular region part;extracellular vesicular exosome;intracellular membrane-bounded organelle;intracellular organelle;intracellular organelle part;intracellular part;membrane;membrane-bounded organelle;membrane-bounded vesicle;mitochondrial inner membrane;mitochondrial membrane;mitochondrial part;mito…	Benzoate degradation;Fatty acid elongation in mitochondria;Fatty acid metabolism;Valine, leucine and isoleucine degradation	ABBUD_LIF_SIGNALING_1_UP;ALCALAY_AML_BY_NPM1_LOCALIZATION_DN;BECKER_TAMOXIFEN_RESISTANCE_DN;BERENJENO_ROCK_SIGNALING_NOT_VIA_RHOA_UP;BOYAULT_LIVER_CANCER_SUBCLASS_G123_DN;BROWNE_HCMV_INFECTION_16HR_DN;BURTON_ADIPOGENESIS_6;CAGGTG_V$E12_Q6;CAIRO_HEPATOBLASTOMA_DN;CAIRO_LIVER_DEVELOPMENT_DN;CHEMNITZ_RESPONSE_TO_PROSTAGLANDIN_E2_DN;chr18q21;CYCLIN_D1_UP.V1_DN;DAIRKEE_CANCER_PRONE_RESPONSE_BPA_E2;DEL…	GO:0001666;GO:0006066;GO:0006082;GO:0006629;GO:0006631;GO:0006694;GO:0006695;GO:0006950;GO:0008152;GO:0008202;GO:0008203;GO:0008610;GO:0009058;GO:0009987;GO:0016125;GO:0016126;GO:0019752;GO:0032787;GO:0033554;GO:0042180;GO:0042221;GO:0043436;GO:0044237;GO:0044238;GO:0044255;GO:0044281;GO:0050896;GO:0051716;GO:0070482;GO:0070887;GO:0071453;GO:0071456	GO:0003824;GO:0003988;GO:0016408;GO:0016740;GO:0016746;GO:0016747	GO:0005739;GO:0005743;GO:0016020;GO:0019866;GO:0031090;GO:0031966;GO:0031982;GO:0031988;GO:0043226;GO:0043227;GO:0043229;GO:0043230;GO:0043231;GO:0044421;GO:0044422;GO:0044424;GO:0044429;GO:0044444;GO:0044446;GO:0044464;GO:0065010;GO:0070062			21	21	21	72.3	72.3	72.3	41.924	0	306.1	7399400000	489	29.2699	29.0248	29.162	28.339	27.3047	26.9733	30.6284	29.6675	30.6413	28.0205	27.8029	28.0315
	0.991213	0.317115		2.73902	3.93207	ACACA_HUMAN	ACACA_HUMANAcetyl-CoAcarboxylase1	Q13085	ACACA_HUMAN Acetyl-CoA carboxylase 1	ACACA	ACACA	COG0511	6.3.4.14;6.4.1.2	acetyl-CoA metabolic process;acyl-CoA biosynthetic process;acyl-CoA metabolic process;acylglycerol biosynthetic process;acylglycerol metabolic process;amine transport;amino acid transmembrane transport;amino acid transport;anatomical structure homeostasis;betaine transport;biological regulation;biosynthetic process;biotin metabolic process;carboxylic acid biosynthetic process;carboxylic acid meta…	acetyl-CoA carboxylase activity;adenyl nucleotide binding;adenyl ribonucleotide binding;ATP binding;binding;biotin carboxylase activity;catalytic activity;cation binding;CoA carboxylase activity;ion binding;ligase activity;ligase activity, forming carbon-carbon bonds;ligase activity, forming carbon-nitrogen bonds;metal ion binding;nucleotide binding;purine nucleotide binding;purine ribonucleoside…	actin cytoskeleton;cell part;cytoplasm;cytoplasmic part;cytoskeleton;cytosol;extracellular membrane-bounded organelle;extracellular organelle;extracellular region part;extracellular vesicular exosome;intracellular membrane-bounded organelle;intracellular non-membrane-bounded organelle;intracellular organelle;intracellular organelle part;intracellular part;membrane-bounded organelle;membrane-bound…	Fatty acid biosynthesis;Insulin signaling pathway;Propanoate metabolism;Pyruvate metabolism	AAAGGAT,MIR-501;AACATTC,MIR-409-3P;AACTGGA,MIR-145;AAGGGAT,MIR-188;AAGTCCA,MIR-422B,MIR-422A;ACATTCC,MIR-1,MIR-206;ACCAAAG,MIR-9;ACTGAAA,MIR-30A-3P,MIR-30E-3P;ACTGCAG,MIR-17-3P;ACTGCCT,MIR-34B;ATF2_S_UP.V1_DN;ATF2_UP.V1_DN;ATGAAGG,MIR-205;ATGTAGC,MIR-221,MIR-222;ATGTTAA,MIR-302C;ATGTTTC,MIR-494;ATM_DN.V1_UP;BIOCARTA_CHREBP2_PATHWAY;BIOCARTA_LEPTIN_PATHWAY;BLUM_RESPONSE_TO_SALIRASIB_DN;BOYAULT_LIV…	GO:0001894;GO:0003333;GO:0006082;GO:0006084;GO:0006091;GO:0006112;GO:0006461;GO:0006629;GO:0006631;GO:0006633;GO:0006637;GO:0006638;GO:0006639;GO:0006641;GO:0006662;GO:0006732;GO:0006766;GO:0006767;GO:0006768;GO:0006790;GO:0006807;GO:0006810;GO:0006811;GO:0006812;GO:0006839;GO:0006853;GO:0006865;GO:0006869;GO:0008152;GO:0008610;GO:0009058;GO:0009108;GO:0009893;GO:0009987;GO:0015695;GO:0015697;GO:…	GO:0000166;GO:0003824;GO:0003989;GO:0004075;GO:0005488;GO:0005524;GO:0016421;GO:0016874;GO:0016879;GO:0016885;GO:0017076;GO:0030554;GO:0032553;GO:0032555;GO:0032559;GO:0035639;GO:0043167;GO:0043169;GO:0046872	GO:0005730;GO:0005737;GO:0005739;GO:0005829;GO:0005856;GO:0015629;GO:0031982;GO:0031988;GO:0043226;GO:0043227;GO:0043228;GO:0043229;GO:0043230;GO:0043231;GO:0043232;GO:0044421;GO:0044422;GO:0044424;GO:0044428;GO:0044444;GO:0044446;GO:0044464;GO:0065010;GO:0070062	REACT_11082;REACT_11153;REACT_1319;REACT_147904;REACT_169312;REACT_2122	SM00878	2	2	2	0.6	0.6	0.6	265.55	0.0089952	1.826	4258900000	84	27.7881	27.9291	28.157	26.6344	25.0617	25.0615	28.4279	28.0749	28.3228	29.6555	29.5891	29.3091
	0.197512	-0.106392		1.16955	-1.07819	ACAD8_HUMAN	ACAD8_HUMANIsobutyryl-CoAdehydrogenase,mitochondrial	Q9UKU7	ACAD8_HUMAN Isobutyryl-CoA dehydrogenase, mitochondrial	ACAD8	ACAD8	COG1960	1.3.99.-	amine catabolic process;amine metabolic process;biological regulation;biosynthetic process;branched chain family amino acid catabolic process;branched chain family amino acid metabolic process;carboxylic acid catabolic process;carboxylic acid metabolic process;catabolic process;cellular amine metabolic process;cellular amino acid catabolic process;cellular amino acid metabolic process;cellular bi…	acyl-CoA dehydrogenase activity;binding;catalytic activity;coenzyme binding;cofactor binding;flavin adenine dinucleotide binding;oxidoreductase activity;oxidoreductase activity, acting on the CH-CH group of donors	cell part;cytoplasmic part;intracellular organelle lumen;intracellular organelle part;intracellular part;membrane-enclosed lumen;mitochondrial matrix;mitochondrial part;organelle lumen;organelle part	Valine, leucine and isoleucine degradation	BCAT_GDS748_DN;BENPORATH_MYC_MAX_TARGETS;BLALOCK_ALZHEIMERS_DISEASE_DN;BLALOCK_ALZHEIMERS_DISEASE_INCIPIENT_DN;BRUINS_UVC_RESPONSE_VIA_TP53_GROUP_B;chr11q25;CREIGHTON_ENDOCRINE_THERAPY_RESISTANCE_3;DANG_BOUND_BY_MYC;DIAZ_CHRONIC_MEYLOGENOUS_LEUKEMIA_UP;FARMER_BREAST_CANCER_APOCRINE_VS_BASAL;FARMER_BREAST_CANCER_APOCRINE_VS_LUMINAL;GRAESSMANN_APOPTOSIS_BY_DOXORUBICIN_UP;GRAESSMANN_RESPONSE_TO_MC_A…	GO:0006082;GO:0006139;GO:0006351;GO:0006355;GO:0006520;GO:0006573;GO:0006574;GO:0006629;GO:0006807;GO:0008152;GO:0009056;GO:0009058;GO:0009059;GO:0009063;GO:0009081;GO:0009083;GO:0009308;GO:0009310;GO:0009889;GO:0009987;GO:0010468;GO:0010556;GO:0016054;GO:0016070;GO:0019219;GO:0019222;GO:0019752;GO:0031323;GO:0031326;GO:0032774;GO:0034641;GO:0034645;GO:0042180;GO:0043170;GO:0043436;GO:0044106;GO:…	GO:0003824;GO:0003995;GO:0005488;GO:0016491;GO:0016627;GO:0048037;GO:0050660;GO:0050662	GO:0005759;GO:0031974;GO:0043233;GO:0044422;GO:0044424;GO:0044429;GO:0044444;GO:0044446;GO:0044464;GO:0070013	REACT_197		8	8	8	26.3	26.3	26.3	45.069	0	18.786	296200000	36	25.2362	25.2572	25.4492	24.1489	23.121	22.977	25.5993	25.0152	25.0089	21.884	22.5313	22.5971
	3.34083	1.4313		1.12718	1.54231	ACAD9_HUMAN	ACAD9_HUMANAcyl-CoAdehydrogenasefamilymember9,mitochondrial	Q9H845	ACAD9_HUMAN Acyl-CoA dehydrogenase family member 9, mitochondrial	ACAD9	ACAD9	COG1960	1.3.99.-	cellular component assembly;cellular component assembly at cellular level;cellular component biogenesis;cellular component organization;cellular component organization at cellular level;cellular component organization or biogenesis;cellular component organization or biogenesis at cellular level;cellular macromolecular complex assembly;cellular macromolecular complex subunit organization;cellular …	acyl-CoA dehydrogenase activity;binding;catalytic activity;coenzyme binding;cofactor binding;flavin adenine dinucleotide binding;oxidoreductase activity;oxidoreductase activity, acting on the CH-CH group of donors	cell part;cell projection;cytoplasmic part;dendrite;intracellular membrane-bounded organelle;intracellular organelle;intracellular part;membrane-bounded organelle;mitochondrion;neuron projection;nucleus;organelle	Geraniol degradation;Naphthalene degradation	BURTON_ADIPOGENESIS_6;chr3q21;DARWICHE_PAPILLOMA_RISK_HIGH_DN;DARWICHE_PAPILLOMA_RISK_LOW_UP;DARWICHE_SKIN_TUMOR_PROMOTER_DN;DARWICHE_SQUAMOUS_CELL_CARCINOMA_DN;DOUGLAS_BMI1_TARGETS_DN;GCM_RAB10;GRAESSMANN_APOPTOSIS_BY_DOXORUBICIN_UP;GSE13485_PRE_VS_POST_YF17D_VACCINATION_PBMC_DN;GSE15930_NAIVE_VS_24H_IN_VITRO_STIM_CD8_TCELL_DN;GSE15930_NAIVE_VS_24H_IN_VITRO_STIM_IL12_CD8_TCELL_DN;GSE15930_NAIVE_…	GO:0006461;GO:0009987;GO:0010257;GO:0016043;GO:0022607;GO:0032981;GO:0033108;GO:0034621;GO:0034622;GO:0043623;GO:0043933;GO:0044085;GO:0065003;GO:0070271;GO:0071822;GO:0071840;GO:0071841;GO:0071842;GO:0071844;GO:0097031	GO:0003824;GO:0003995;GO:0005488;GO:0016491;GO:0016627;GO:0048037;GO:0050660;GO:0050662	GO:0005634;GO:0005739;GO:0030425;GO:0042995;GO:0043005;GO:0043226;GO:0043227;GO:0043229;GO:0043231;GO:0044424;GO:0044444;GO:0044464			16	16	16	37.8	37.8	37.8	68.76	0	57.472	1089300000	80	26.2747	25.8208	25.9564	25.8668	23.9633	24.1631	27.4541	27.4162	27.4755	26.5707	25.8043	26.2451
	2.01668	1.04745		0.0415021	-0.0642986	ACADM_HUMAN	ACADM_HUMANMedium-chainspecificacyl-CoAdehydrogenase,mitochondrial	P11310	ACADM_HUMAN Medium-chain specific acyl-CoA dehydrogenase, mitochondrial	ACADM	ACADM	COG1960	1.3.8.7	amine biosynthetic process;amine metabolic process;betaine biosynthetic process;betaine metabolic process;biosynthetic process;carboxylic acid biosynthetic process;carboxylic acid catabolic process;carboxylic acid metabolic process;carnitine biosynthetic process;carnitine metabolic process;carnitine metabolic process, CoA-linked;catabolic process;cellular amine metabolic process;cellular amino ac…	acyl-CoA dehydrogenase activity;binding;catalytic activity;coenzyme binding;cofactor binding;flavin adenine dinucleotide binding;identical protein binding;medium-chain-acyl-CoA dehydrogenase activity;oxidoreductase activity;oxidoreductase activity, acting on the CH-CH group of donors;protein binding	axon;cell part;cell projection;cytoplasmic part;extracellular membrane-bounded organelle;extracellular organelle;extracellular region part;extracellular vesicular exosome;intracellular membrane-bounded organelle;intracellular organelle;intracellular organelle lumen;intracellular organelle part;intracellular part;membrane-bounded organelle;membrane-bounded vesicle;membrane-enclosed lumen;mitochond…	beta-Alanine metabolism;Fatty acid metabolism;PPAR signaling pathway;Propanoate metabolism;Valine, leucine and isoleucine degradation	ALONSO_METASTASIS_UP;BAELDE_DIABETIC_NEPHROPATHY_DN;BENPORATH_MYC_TARGETS_WITH_EBOX;BENPORATH_NANOG_TARGETS;BERENJENO_TRANSFORMED_BY_RHOA_DN;BURTON_ADIPOGENESIS_5;CAIRO_HEPATOBLASTOMA_DN;CAIRO_LIVER_DEVELOPMENT_DN;CARBOXYLIC_ACID_METABOLIC_PROCESS;CASTELLANO_NRAS_TARGETS_UP;CATABOLIC_PROCESS;CELLULAR_CATABOLIC_PROCESS;CELLULAR_LIPID_CATABOLIC_PROCESS;CELLULAR_LIPID_METABOLIC_PROCESS;CHICAS_RB1_TA…	GO:0006082;GO:0006520;GO:0006577;GO:0006578;GO:0006629;GO:0006631;GO:0006635;GO:0006807;GO:0008152;GO:0008652;GO:0009056;GO:0009058;GO:0009062;GO:0009308;GO:0009309;GO:0009437;GO:0009987;GO:0016042;GO:0016053;GO:0016054;GO:0019254;GO:0019395;GO:0019752;GO:0030258;GO:0032787;GO:0033539;GO:0034440;GO:0034641;GO:0042180;GO:0043436;GO:0044106;GO:0044237;GO:0044238;GO:0044242;GO:0044248;GO:0044249;GO:…	GO:0003824;GO:0003995;GO:0005488;GO:0005515;GO:0016491;GO:0016627;GO:0042802;GO:0048037;GO:0050660;GO:0050662;GO:0070991	GO:0005634;GO:0005739;GO:0005759;GO:0030424;GO:0031974;GO:0031982;GO:0031988;GO:0042995;GO:0043005;GO:0043226;GO:0043227;GO:0043229;GO:0043230;GO:0043231;GO:0043233;GO:0044421;GO:0044422;GO:0044424;GO:0044429;GO:0044444;GO:0044446;GO:0044464;GO:0065010;GO:0070013;GO:0070062	REACT_116145;REACT_160;REACT_1697;REACT_1708		19	19	19	43.9	43.9	43.9	46.588	0	70.135	1951500000	188	26.7604	27.3925	27.2842	27.3623	25.8716	26.0723	28.2147	27.9893	28.3754	25.8812	26.5969	26.6352
	2.63307	1.17127		0.220624	-0.778008	ACADS_HUMAN	ACADS_HUMANShort-chainspecificacyl-CoAdehydrogenase,mitochondrial	P16219	ACADS_HUMAN Short-chain specific acyl-CoA dehydrogenase, mitochondrial	ACADS	ACADS	COG1960	1.3.8.1	butyrate catabolic process;butyrate metabolic process;carboxylic acid catabolic process;carboxylic acid metabolic process;catabolic process;cellular catabolic process;cellular component assembly;cellular component organization;cellular component organization or biogenesis;cellular ketone metabolic process;cellular lipid catabolic process;cellular lipid metabolic process;cellular metabolic process…	acyl-CoA dehydrogenase activity;binding;butyryl-CoA dehydrogenase activity;carboxylic acid binding;catalytic activity;coenzyme binding;cofactor binding;fatty acid binding;fatty-acyl-CoA binding;flavin adenine dinucleotide binding;lipid binding;monocarboxylic acid binding;oxidoreductase activity;oxidoreductase activity, acting on the CH-CH group of donors	cell part;cytoplasmic part;intracellular membrane-bounded organelle;intracellular organelle;intracellular organelle lumen;intracellular organelle part;intracellular part;membrane;membrane-bounded organelle;membrane-enclosed lumen;mitochondrial matrix;mitochondrial membrane;mitochondrial part;mitochondrion;nucleus;organelle;organelle lumen;organelle membrane;organelle part	Butanoate metabolism;Fatty acid metabolism;Valine, leucine and isoleucine degradation	ACEVEDO_LIVER_CANCER_DN;ACEVEDO_LIVER_TUMOR_VS_NORMAL_ADJACENT_TISSUE_DN;BIDUS_METASTASIS_DN;BLALOCK_ALZHEIMERS_DISEASE_UP;BURTON_ADIPOGENESIS_6;CAIRO_HEPATOBLASTOMA_DN;CARBOXYLIC_ACID_METABOLIC_PROCESS;CATABOLIC_PROCESS;CELLULAR_CATABOLIC_PROCESS;CELLULAR_LIPID_CATABOLIC_PROCESS;CELLULAR_LIPID_METABOLIC_PROCESS;chr12q24;CYTOPLASM;CYTOPLASMIC_PART;FATTY_ACID_BETA_OXIDATION;FATTY_ACID_METABOLIC_PR…	GO:0006082;GO:0006461;GO:0006629;GO:0006631;GO:0006635;GO:0006950;GO:0008152;GO:0009056;GO:0009062;GO:0009605;GO:0009719;GO:0009725;GO:0009987;GO:0009991;GO:0010033;GO:0016042;GO:0016043;GO:0016054;GO:0019395;GO:0019605;GO:0019626;GO:0019752;GO:0022607;GO:0030258;GO:0031667;GO:0031960;GO:0032787;GO:0033539;GO:0034440;GO:0042180;GO:0042221;GO:0042594;GO:0043436;GO:0043933;GO:0044237;GO:0044238;GO:…	GO:0000062;GO:0003824;GO:0003995;GO:0004085;GO:0005488;GO:0005504;GO:0008289;GO:0016491;GO:0016627;GO:0031406;GO:0033293;GO:0048037;GO:0050660;GO:0050662	GO:0005634;GO:0005739;GO:0005759;GO:0016020;GO:0031090;GO:0031966;GO:0031974;GO:0043226;GO:0043227;GO:0043229;GO:0043231;GO:0043233;GO:0044422;GO:0044424;GO:0044429;GO:0044444;GO:0044446;GO:0044464;GO:0070013	REACT_1887;REACT_419		13	13	13	39.6	39.6	39.6	44.297	0	63.709	1918600000	179	27.0273	27.4681	27.1606	26.7369	25.8167	24.9627	28.4143	28.1902	28.5653	25.8314	22.5689	26.7819
	0.78381	-1.40557		0.084632	0.195883	ACDSB_HUMAN	ACDSB_HUMANShort/branchedchainspecificacyl-CoAdehydrogenase,mitochondrial	P45954	ACDSB_HUMAN Short/branched chain specific acyl-CoA dehydrogenase, mitochondrial	ACADSB	ACADSB	COG1960	1.3.8.5	amine catabolic process;amine metabolic process;branched chain family amino acid catabolic process;branched chain family amino acid metabolic process;carboxylic acid catabolic process;carboxylic acid metabolic process;catabolic process;cellular amine metabolic process;cellular amino acid catabolic process;cellular amino acid metabolic process;cellular catabolic process;cellular ketone metabolic p…	acyl-CoA dehydrogenase activity;binding;catalytic activity;coenzyme binding;cofactor binding;flavin adenine dinucleotide binding;oxidoreductase activity;oxidoreductase activity, acting on the CH-CH group of donors	cell part;cytoplasmic part;extracellular membrane-bounded organelle;extracellular organelle;extracellular region part;extracellular vesicular exosome;intracellular membrane-bounded organelle;intracellular organelle;intracellular organelle lumen;intracellular organelle part;intracellular part;membrane-bounded organelle;membrane-bounded vesicle;membrane-enclosed lumen;mitochondrial matrix;mitochond…	Fatty acid metabolism;Valine, leucine and isoleucine degradation	AAAGGAT,MIR-501;ACEVEDO_LIVER_CANCER_DN;ACEVEDO_NORMAL_TISSUE_ADJACENT_TO_LIVER_TUMOR_DN;BRUINS_UVC_RESPONSE_LATE;CAGGTG_V$E12_Q6;CARBOXYLIC_ACID_METABOLIC_PROCESS;CELLULAR_LIPID_METABOLIC_PROCESS;chr10q25;CREIGHTON_ENDOCRINE_THERAPY_RESISTANCE_5;CYTOPLASM;CYTOPLASMIC_PART;DOANE_BREAST_CANCER_ESR1_UP;ENK_UV_RESPONSE_KERATINOCYTE_DN;FARMER_BREAST_CANCER_BASAL_VS_LULMINAL;FATTY_ACID_METABOLIC_PROCE…	GO:0006082;GO:0006520;GO:0006629;GO:0006631;GO:0006807;GO:0008152;GO:0009056;GO:0009063;GO:0009081;GO:0009083;GO:0009308;GO:0009310;GO:0009987;GO:0016054;GO:0019752;GO:0032787;GO:0034641;GO:0042180;GO:0043436;GO:0044106;GO:0044237;GO:0044238;GO:0044248;GO:0044255;GO:0044281;GO:0044282;GO:0046395	GO:0003824;GO:0003995;GO:0005488;GO:0016491;GO:0016627;GO:0048037;GO:0050660;GO:0050662	GO:0005739;GO:0005759;GO:0031974;GO:0031982;GO:0031988;GO:0043226;GO:0043227;GO:0043229;GO:0043230;GO:0043231;GO:0043233;GO:0044421;GO:0044422;GO:0044424;GO:0044429;GO:0044444;GO:0044446;GO:0044464;GO:0065010;GO:0070013;GO:0070062	REACT_197		13	13	13	38	38	38	47.485	0	53.811	798390000	98	27.0716	27.056	26.9085	25.409	24.3985	24.0935	26.434	23.9554	26.4301	25.8073	23.4317	25.2496
	4.25261	1.14079		2.57153	1.46037	ACADV_HUMAN	ACADV_HUMANVerylong-chainspecificacyl-CoAdehydrogenase,mitochondrial	P49748	ACADV_HUMAN Very long-chain specific acyl-CoA dehydrogenase, mitochondrial	ACADVL	ACADVL	COG1960	1.3.8.9	biological regulation;carboxylic acid catabolic process;carboxylic acid metabolic process;catabolic process;cell differentiation;cellular catabolic process;cellular developmental process;cellular ketone metabolic process;cellular lipid catabolic process;cellular lipid metabolic process;cellular macromolecule metabolic process;cellular metabolic process;cellular process;cellular protein metabolic …	acyl-CoA dehydrogenase activity;binding;catalytic activity;coenzyme binding;cofactor binding;flavin adenine dinucleotide binding;long-chain-acyl-CoA dehydrogenase activity;oxidoreductase activity;oxidoreductase activity, acting on the CH-CH group of donors	cell part;cytoplasm;cytoplasmic part;intracellular membrane-bounded organelle;intracellular non-membrane-bounded organelle;intracellular organelle;intracellular organelle lumen;intracellular organelle part;intracellular part;membrane;membrane-bounded organelle;membrane-enclosed lumen;mitochondrial inner membrane;mitochondrial matrix;mitochondrial membrane;mitochondrial nucleoid;mitochondrial part…	Fatty acid metabolism	ACEVEDO_LIVER_CANCER_DN;ACEVEDO_LIVER_TUMOR_VS_NORMAL_ADJACENT_TISSUE_DN;BOYAULT_LIVER_CANCER_SUBCLASS_G3_DN;BROWNE_HCMV_INFECTION_16HR_DN;BROWNE_HCMV_INFECTION_48HR_DN;CARBOXYLIC_ACID_METABOLIC_PROCESS;CASORELLI_ACUTE_PROMYELOCYTIC_LEUKEMIA_DN;CATABOLIC_PROCESS;CELLULAR_CATABOLIC_PROCESS;CELLULAR_LIPID_CATABOLIC_PROCESS;CELLULAR_LIPID_METABOLIC_PROCESS;chr17p13;CONCANNON_APOPTOSIS_BY_EPOXOMICIN_…	GO:0001659;GO:0006082;GO:0006091;GO:0006629;GO:0006631;GO:0006635;GO:0006950;GO:0006984;GO:0006986;GO:0007165;GO:0008152;GO:0009056;GO:0009062;GO:0009889;GO:0009890;GO:0009892;GO:0009987;GO:0010033;GO:0010565;GO:0015980;GO:0016042;GO:0016054;GO:0019216;GO:0019217;GO:0019218;GO:0019222;GO:0019395;GO:0019538;GO:0019752;GO:0030154;GO:0030258;GO:0030855;GO:0030968;GO:0031323;GO:0031324;GO:0031326;GO:…	GO:0003824;GO:0003995;GO:0004466;GO:0005488;GO:0016491;GO:0016627;GO:0048037;GO:0050660;GO:0050662	GO:0005634;GO:0005730;GO:0005737;GO:0005739;GO:0005743;GO:0005759;GO:0009295;GO:0016020;GO:0019866;GO:0031090;GO:0031966;GO:0031974;GO:0042645;GO:0043226;GO:0043227;GO:0043228;GO:0043229;GO:0043231;GO:0043232;GO:0043233;GO:0044422;GO:0044424;GO:0044428;GO:0044429;GO:0044444;GO:0044446;GO:0044464;GO:0070013	REACT_18273;REACT_2025		29	29	29	53.1	53.1	53.1	70.389	0	183.55	8157300000	446	28.9497	29.1203	29.0949	28.1563	27.4932	27.9712	30.2197	30.1278	30.2398	29.4327	29.1394	29.4297
	3.31904	0.972968		0.12117	0.144712	ACAP1_HUMAN	ACAP1_HUMANArf-GAPwithcoiled-coil,ANKrepeatandPHdomain-containingprotein1	Q15027	ACAP1_HUMAN Arf-GAP with coiled-coil, ANK repeat and PH domain-containing protein 1	ACAP1	ACAP1	COG5347		establishment of localization;establishment of protein localization;protein transport;transport	binding;cation binding;enzyme activator activity;enzyme regulator activity;GTPase activator activity;GTPase regulator activity;ion binding;metal ion binding;nucleoside-triphosphatase regulator activity;transition metal ion binding;zinc ion binding	cell part;cytoplasmic part;endosomal part;endosome membrane;intracellular organelle part;intracellular part;membrane;organelle membrane;organelle part;recycling endosome membrane	Endocytosis	BORCZUK_MALIGNANT_MESOTHELIOMA_DN;CAGGTG_V$E12_Q6;chr17p13;DODD_NASOPHARYNGEAL_CARCINOMA_UP;FEVR_CTNNB1_TARGETS_UP;GCANCTGNY_V$MYOD_Q6;GGGAGGRR_V$MAZ_Q6;GINESTIER_BREAST_CANCER_ZNF217_AMPLIFIED_DN;GNF2_ATM;GOLDRATH_NAIVE_VS_EFF_CD8_TCELL_UP;GSE10325_BCELL_VS_LUPUS_BCELL_UP;GSE10325_BCELL_VS_MYELOID_UP;GSE10325_LUPUS_CD4_TCELL_VS_LUPUS_MYELOID_UP;GSE14308_TH2_VS_TH17_DN;GSE1460_DP_THYMOCYTE_VS_THY…	GO:0006810;GO:0015031;GO:0045184;GO:0051234	GO:0005096;GO:0005488;GO:0008047;GO:0008270;GO:0030234;GO:0030695;GO:0043167;GO:0043169;GO:0046872;GO:0046914;GO:0060589	GO:0010008;GO:0016020;GO:0031090;GO:0044422;GO:0044424;GO:0044440;GO:0044444;GO:0044446;GO:0044464;GO:0055038		SM00105;SM00233;SM00248	36	36	35	58.1	58.1	57	81.535	0	323.31	7135000000	515	29.1915	29.2049	29.2944	28.589	27.253	27.4904	30.2452	30.0349	30.3296	28.1461	27.6546	27.9659
	0.534263	-0.733323		1.94027	-2.39967	ACAP2_HUMAN;ACAP3_HUMAN	ACAP2_HUMANArf-GAPwithcoiled-coil,ANKrepeatandPHdomain-containingprotein2	Q15057	ACAP2_HUMAN Arf-GAP with coiled-coil, ANK repeat and PH domain-containing protein 2	ACAP2	ACAP2	COG5347			binding;cation binding;enzyme activator activity;enzyme regulator activity;GTPase activator activity;GTPase regulator activity;ion binding;metal ion binding;nucleoside-triphosphatase regulator activity;transition metal ion binding;zinc ion binding	cell part;cytoplasmic part;endosomal part;endosome membrane;intracellular organelle part;intracellular part;membrane;organelle membrane;organelle part	Endocytosis	ACATTCC,MIR-1,MIR-206;ACCATTT,MIR-522;AMUNDSON_RESPONSE_TO_ARSENITE;ATGTACA,MIR-493;BILBAN_B_CLL_LPL_DN;BLALOCK_ALZHEIMERS_DISEASE_UP;BORCZUK_MALIGNANT_MESOTHELIOMA_UP;BOYLAN_MULTIPLE_MYELOMA_C_D_UP;chr3q29;CTTTGA_V$LEF1_Q2;CUI_TCF21_TARGETS_2_DN;DACOSTA_UV_RESPONSE_VIA_ERCC3_DN;DACOSTA_UV_RESPONSE_VIA_ERCC3_TTD_DN;DACOSTA_UV_RESPONSE_VIA_ERCC3_XPCS_DN;DAIRKEE_TERT_TARGETS_DN;DASU_IL6_SIGNALING_S…		GO:0005096;GO:0005488;GO:0008047;GO:0008270;GO:0030234;GO:0030695;GO:0043167;GO:0043169;GO:0046872;GO:0046914;GO:0060589	GO:0010008;GO:0016020;GO:0031090;GO:0044422;GO:0044424;GO:0044440;GO:0044444;GO:0044446;GO:0044464		SM00105;SM00233;SM00248	25	24	24	40.9	39.8	39.8	88.028	0	65.475	796310000	113	26.9272	26.9997	26.323	26.5566	25.4393	25.0451	25.6347	25.2851	27.1301	22.7488	23.3104	23.7828
	1.25338	1.11384		1.36002	1.78422	THIL_HUMAN	THIL_HUMANAcetyl-CoAacetyltransferase,mitochondrial	P24752	THIL_HUMAN Acetyl-CoA acetyltransferase, mitochondrial	ACAT1	ACAT1	COG0183	2.3.1.9	adipose tissue development;amine catabolic process;amine metabolic process;anatomical structure development;biosynthetic process;brain development;branched chain family amino acid catabolic process;branched chain family amino acid metabolic process;carboxylic acid catabolic process;carboxylic acid metabolic process;catabolic process;cellular amine metabolic process;cellular amino acid catabolic p…	acetyl-CoA C-acetyltransferase activity;acetyl-CoA C-acyltransferase activity;acetyltransferase activity;binding;C-acetyltransferase activity;C-acyltransferase activity;catalytic activity;cation binding;coenzyme binding;cofactor binding;ion binding;metal ion binding;transferase activity;transferase activity, transferring acyl groups;transferase activity, transferring acyl groups other than amino-…	cell part;cytoplasmic part;extracellular membrane-bounded organelle;extracellular organelle;extracellular region part;extracellular vesicular exosome;intracellular membrane-bounded organelle;intracellular organelle;intracellular organelle lumen;intracellular organelle part;intracellular part;membrane;membrane-bounded organelle;membrane-bounded vesicle;membrane-enclosed lumen;mitochondrial inner m…	Benzoate degradation;Butanoate metabolism;Carbon fixation pathways in prokaryotes;Fatty acid metabolism;Glyoxylate and dicarboxylate metabolism;Lysine degradation;Propanoate metabolism;Pyruvate metabolism;Synthesis and degradation of ketone bodies;Terpenoid backbone biosynthesis;Tryptophan metabolism;Two-component system;Valine, leucine and isoleucine degradation	ACETYLTRANSFERASE_ACTIVITY;ACEVEDO_LIVER_CANCER_DN;ALCALAY_AML_BY_NPM1_LOCALIZATION_DN;BLALOCK_ALZHEIMERS_DISEASE_DN;BOYAULT_LIVER_CANCER_SUBCLASS_G3_DN;CAIRO_HEPATOBLASTOMA_DN;CASORELLI_ACUTE_PROMYELOCYTIC_LEUKEMIA_DN;chr11q22;CYTOPLASM;CYTOPLASMIC_PART;DEURIG_T_CELL_PROLYMPHOCYTIC_LEUKEMIA_DN;DIAZ_CHRONIC_MEYLOGENOUS_LEUKEMIA_UP;DURCHDEWALD_SKIN_CARCINOGENESIS_UP;ENK_UV_RESPONSE_EPIDERMIS_DN;FL…	GO:0001889;GO:0006082;GO:0006461;GO:0006520;GO:0006629;GO:0006807;GO:0006950;GO:0007420;GO:0008152;GO:0009056;GO:0009058;GO:0009063;GO:0009081;GO:0009083;GO:0009308;GO:0009310;GO:0009605;GO:0009719;GO:0009725;GO:0009888;GO:0009987;GO:0009991;GO:0010033;GO:0014070;GO:0016043;GO:0016054;GO:0019752;GO:0022607;GO:0031667;GO:0032502;GO:0034641;GO:0042180;GO:0042221;GO:0042594;GO:0043436;GO:0043933;GO:…	GO:0003824;GO:0003985;GO:0003988;GO:0005488;GO:0016407;GO:0016408;GO:0016453;GO:0016740;GO:0016746;GO:0016747;GO:0043167;GO:0043169;GO:0046872;GO:0048037;GO:0050662	GO:0005739;GO:0005743;GO:0005759;GO:0016020;GO:0019866;GO:0031090;GO:0031966;GO:0031974;GO:0031982;GO:0031988;GO:0043226;GO:0043227;GO:0043229;GO:0043230;GO:0043231;GO:0043233;GO:0044421;GO:0044422;GO:0044424;GO:0044429;GO:0044444;GO:0044446;GO:0044464;GO:0065010;GO:0070013;GO:0070062	REACT_1464;REACT_197;REACT_59		20	20	20	54.3	54.3	54.3	45.199	0	323.31	7822500000	348	28.9088	28.5684	29.0302	28.6717	27.1263	27.1715	30.406	29.166	30.2769	30.1232	29.0327	29.1662
	3.18294	2.10501		2.5673	2.48574	THIC_HUMAN	THIC_HUMANAcetyl-CoAacetyltransferase,cytosolic	Q9BWD1	THIC_HUMAN Acetyl-CoA acetyltransferase, cytosolic	ACAT2	ACAT2	COG0183	2.3.1.9	lipid metabolic process;metabolic process;primary metabolic process	acetyl-CoA C-acetyltransferase activity;acetyl-CoA C-acyltransferase activity;acetyltransferase activity;C-acetyltransferase activity;C-acyltransferase activity;catalytic activity;transferase activity;transferase activity, transferring acyl groups;transferase activity, transferring acyl groups other than amino-acyl groups	cell part;cytoplasm;extracellular membrane-bounded organelle;extracellular organelle;extracellular region part;extracellular vesicular exosome;intracellular membrane-bounded organelle;intracellular non-membrane-bounded organelle;intracellular organelle;intracellular organelle part;intracellular part;membrane-bounded organelle;membrane-bounded vesicle;non-membrane-bounded organelle;nuclear part;nu…	Benzoate degradation;Butanoate metabolism;Carbon fixation pathways in prokaryotes;Fatty acid metabolism;Glyoxylate and dicarboxylate metabolism;Lysine degradation;Propanoate metabolism;Pyruvate metabolism;Synthesis and degradation of ketone bodies;Terpenoid backbone biosynthesis;Tryptophan metabolism;Two-component system;Valine, leucine and isoleucine degradation	ACEVEDO_LIVER_CANCER_DN;ACEVEDO_NORMAL_TISSUE_ADJACENT_TO_LIVER_TUMOR_DN;AFFAR_YY1_TARGETS_DN;BENPORATH_NANOG_TARGETS;BROWNE_HCMV_INFECTION_14HR_DN;CAMP_UP.V1_DN;CASORELLI_ACUTE_PROMYELOCYTIC_LEUKEMIA_DN;chr6q25;CYTOPLASM;DAVICIONI_RHABDOMYOSARCOMA_PAX_FOXO1_FUSION_UP;DAVICIONI_TARGETS_OF_PAX_FOXO1_FUSIONS_UP;FEVR_CTNNB1_TARGETS_DN;FORTSCHEGGER_PHF8_TARGETS_DN;GGGCGGR_V$SP1_Q6;GSE11057_CD4_EFF_ME…	GO:0006629;GO:0008152;GO:0044238	GO:0003824;GO:0003985;GO:0003988;GO:0016407;GO:0016408;GO:0016453;GO:0016740;GO:0016746;GO:0016747	GO:0005634;GO:0005654;GO:0005730;GO:0005737;GO:0031982;GO:0031988;GO:0043226;GO:0043227;GO:0043228;GO:0043229;GO:0043230;GO:0043231;GO:0043232;GO:0044421;GO:0044422;GO:0044424;GO:0044428;GO:0044446;GO:0044464;GO:0065010;GO:0070062			17	17	17	68.3	68.3	68.3	41.35	0	265.86	7530900000	348	28.5247	28.3676	28.2995	27.1583	26.1346	25.9884	30.5326	30.1266	30.8477	29.007	28.7624	28.969
	1.38188	1.57592		0.223251	0.613395	GCP60_HUMAN	GCP60_HUMANGolgiresidentproteinGCP60	Q9H3P7	GCP60_HUMAN Golgi resident protein GCP60	ACBD3	ACBD3	NOG287879		biosynthetic process;establishment of localization;lipid biosynthetic process;lipid metabolic process;metabolic process;primary metabolic process;steroid biosynthetic process;steroid metabolic process;transport	binding;carboxylic acid binding;coenzyme binding;cofactor binding;fatty acid binding;fatty-acyl-CoA binding;lipid binding;monocarboxylic acid binding	cell part;cytoplasmic part;Golgi apparatus;Golgi apparatus part;Golgi membrane;integral to membrane;intracellular membrane-bounded organelle;intracellular organelle;intracellular organelle part;intracellular part;intrinsic to membrane;membrane;membrane part;membrane-bounded organelle;mitochondrion;organelle;organelle membrane;organelle part		AACTGGA,MIR-145;AACTTT_UNKNOWN;ACEVEDO_LIVER_CANCER_UP;ACEVEDO_LIVER_TUMOR_VS_NORMAL_ADJACENT_TISSUE_UP;ATACTGT,MIR-144;ATGTTAA,MIR-302C;BAELDE_DIABETIC_NEPHROPATHY_DN;BLUM_RESPONSE_TO_SALIRASIB_UP;BORCZUK_MALIGNANT_MESOTHELIOMA_UP;BUYTAERT_PHOTODYNAMIC_THERAPY_STRESS_UP;CACTGCC,MIR-34A,MIR-34C,MIR-449;CHICAS_RB1_TARGETS_SENESCENT;chr1q41;CREIGHTON_ENDOCRINE_THERAPY_RESISTANCE_3;CYTAGCAAY_UNKNOWN…	GO:0006629;GO:0006694;GO:0006810;GO:0008152;GO:0008202;GO:0008610;GO:0009058;GO:0044238;GO:0051234	GO:0000062;GO:0005488;GO:0005504;GO:0008289;GO:0031406;GO:0033293;GO:0048037;GO:0050662	GO:0000139;GO:0005739;GO:0005794;GO:0016020;GO:0016021;GO:0031090;GO:0031224;GO:0043226;GO:0043227;GO:0043229;GO:0043231;GO:0044422;GO:0044424;GO:0044425;GO:0044431;GO:0044444;GO:0044446;GO:0044464			7	7	7	24.1	24.1	24.1	60.593	0	36.82	406000000	50	25.1053	24.9626	23.4456	24.7412	23.2593	22.3131	26.0495	26.1496	26.0422	25.4244	24.1	22.6294
+	7.41592	26.6193	+	8.44301	-22.996	ACD_HUMAN	ACD_HUMANAdrenocorticaldysplasiaproteinhomolog	Q96AP0	ACD_HUMAN Adrenocortical dysplasia protein homolog	ACD	ACD	NOG81452		anatomical structure development;anatomical structure homeostasis;anatomical structure morphogenesis;appendage morphogenesis;biological regulation;cellular component assembly;cellular component assembly at cellular level;cellular component organization;cellular component organization at cellular level;cellular component organization or biogenesis;cellular component organization or biogenesis at c…	binding;DNA binding;DNA polymerase binding;enzyme binding;nucleic acid binding;protein binding	cell part;chromosomal part;chromosome, telomeric region;cytoplasm;intracellular membrane-bounded organelle;intracellular organelle;intracellular organelle part;intracellular part;macromolecular complex;membrane-bounded organelle;nuclear chromosome part;nuclear part;nuclear telomere cap complex;nucleoplasm;nucleus;organelle;organelle part;protein-DNA complex;telomere cap complex		ASTON_MAJOR_DEPRESSIVE_DISORDER_UP;BENPORATH_CYCLING_GENES;BENPORATH_OCT4_TARGETS;BIOPOLYMER_METABOLIC_PROCESS;chr16q22;CHROMOSOMAL_PART;CHROMOSOME;CHROMOSOME_ORGANIZATION_AND_BIOGENESIS;DNA_METABOLIC_PROCESS;GSE11924_TFH_VS_TH17_CD4_TCELL_UP;GSE14000_TRANSLATED_RNA_VS_MRNA_DC_UP;GSE16522_MEMORY_VS_NAIVE_ANTI_CD3CD28_STIM_CD8_TCELL_UP;GSE17721_CTRL_VS_POLYIC_1H_BMDM_UP;GSE17721_LPS_VS_CPG_24H_BMD…	GO:0000723;GO:0001501;GO:0001655;GO:0003002;GO:0006139;GO:0006259;GO:0006275;GO:0006807;GO:0006810;GO:0006886;GO:0006950;GO:0006974;GO:0006996;GO:0007389;GO:0008104;GO:0008152;GO:0008156;GO:0009653;GO:0009889;GO:0009890;GO:0009892;GO:0009987;GO:0010556;GO:0010558;GO:0010605;GO:0010639;GO:0015031;GO:0016043;GO:0016233;GO:0019219;GO:0019222;GO:0022607;GO:0030326;GO:0031323;GO:0031324;GO:0031326;GO:…	GO:0003676;GO:0003677;GO:0005488;GO:0005515;GO:0019899;GO:0070182	GO:0000781;GO:0000782;GO:0000783;GO:0005634;GO:0005654;GO:0005737;GO:0032991;GO:0032993;GO:0043226;GO:0043227;GO:0043229;GO:0043231;GO:0044422;GO:0044424;GO:0044427;GO:0044428;GO:0044446;GO:0044454;GO:0044464	REACT_169185;REACT_75792;REACT_7963		3	3	3	13.2	13.2	13.2	57.733	0	11.913	343100000	7	0.001	0.001	0.001	23.0204	23.1815	22.7891	27.0072	26.1865	26.6672	0.001	0.001	0.001
	2.16434	0.559729		0.41796	0.48133	ACINU_HUMAN	ACINU_HUMANApoptoticchromatincondensationinducerinthenucleus	Q9UKV3	ACINU_HUMAN Apoptotic chromatin condensation inducer in the nucleus	ACIN1	ACIN1	NOG291715		apoptosis;apoptotic chromosome condensation;biological regulation;cell death;cell differentiation;cellular component disassembly;cellular component disassembly at cellular level;cellular component disassembly involved in apoptosis;cellular component organization;cellular component organization at cellular level;cellular component organization or biogenesis;cellular component organization or bioge…	ATPase activity;binding;catalytic activity;enzyme binding;hydrolase activity;hydrolase activity, acting on acid anhydrides;hydrolase activity, acting on acid anhydrides, in phosphorus-containing anhydrides;nucleic acid binding;nucleoside-triphosphatase activity;nucleotide binding;protein binding;pyrophosphatase activity	cell part;cytoplasm;cytoplasmic part;cytosol;intracellular membrane-bounded organelle;intracellular non-membrane-bounded organelle;intracellular organelle;intracellular organelle part;intracellular part;membrane;membrane-bounded organelle;non-membrane-bounded organelle;nuclear body;nuclear part;nuclear speck;nucleolus;nucleoplasm;nucleoplasm part;nucleus;organelle;organelle part;plasma membrane	mRNA surveillance pathway;RNA transport;Spliceosome	ACTTTAT,MIR-142-5P;ANATOMICAL_STRUCTURE_DEVELOPMENT;APOPTOSIS_GO;APOPTOTIC_NUCLEAR_CHANGES;APOPTOTIC_PROGRAM;BENPORATH_SOX2_TARGETS;BHAT_ESR1_TARGETS_NOT_VIA_AKT1_UP;BHAT_ESR1_TARGETS_VIA_AKT1_UP;CASORELLI_ACUTE_PROMYELOCYTIC_LEUKEMIA_DN;CCTGAGT,MIR-510;CELL_DEVELOPMENT;CHANG_CORE_SERUM_RESPONSE_DN;chr14q11;CHROMOSOME_CONDENSATION;CHROMOSOME_ORGANIZATION_AND_BIOGENESIS;CRGAARNNNNCGA_UNKNOWN;CTGCA…	GO:0002230;GO:0002682;GO:0002697;GO:0002761;GO:0002763;GO:0002831;GO:0006139;GO:0006259;GO:0006323;GO:0006396;GO:0006397;GO:0006807;GO:0006915;GO:0006921;GO:0006996;GO:0008152;GO:0008219;GO:0008380;GO:0009892;GO:0009894;GO:0009987;GO:0010468;GO:0010506;GO:0010605;GO:0010941;GO:0010942;GO:0012501;GO:0016043;GO:0016070;GO:0016071;GO:0016265;GO:0019219;GO:0019222;GO:0022411;GO:0030099;GO:0030154;GO:…	GO:0000166;GO:0003676;GO:0003824;GO:0005488;GO:0005515;GO:0016462;GO:0016787;GO:0016817;GO:0016818;GO:0016887;GO:0017111;GO:0019899	GO:0005634;GO:0005654;GO:0005730;GO:0005737;GO:0005829;GO:0005886;GO:0016020;GO:0016604;GO:0016607;GO:0043226;GO:0043227;GO:0043228;GO:0043229;GO:0043231;GO:0043232;GO:0044422;GO:0044424;GO:0044428;GO:0044444;GO:0044446;GO:0044451;GO:0044464	REACT_107	SM00360;SM00513	46	46	46	39.4	39.4	39.4	151.86	0	308.11	8160000000	689	29.4307	29.6427	29.6528	29.0554	27.8357	27.4583	30.25	29.9771	30.1783	28.7289	28.4225	28.642
	1.85462	2.01569		2.91657	2.57599	ACLY_HUMAN	ACLY_HUMANATP-citratesynthase	P53396	ACLY_HUMAN ATP-citrate synthase	ACLY	ACLY	COG0372	2.3.3.8	acyl-CoA biosynthetic process;acyl-CoA metabolic process;acylglycerol biosynthetic process;acylglycerol metabolic process;biological regulation;biosynthetic process;carbohydrate metabolic process;carboxylic acid metabolic process;cellular biosynthetic process;cellular carbohydrate metabolic process;cellular ketone metabolic process;cellular lipid metabolic process;cellular metabolic process;cellu…	acid-thiol ligase activity;adenyl nucleotide binding;adenyl ribonucleotide binding;ATP binding;ATP citrate synthase activity;binding;catalytic activity;cation binding;CoA-ligase activity;cofactor binding;ion binding;ligase activity;ligase activity, forming carbon-sulfur bonds;metal ion binding;nucleotide binding;purine nucleotide binding;purine ribonucleoside triphosphate binding;purine ribonucle…	cell part;citrate lyase complex;cytoplasm;cytoplasmic part;cytosol;extracellular membrane-bounded organelle;extracellular organelle;extracellular region part;extracellular vesicular exosome;intracellular membrane-bounded organelle;intracellular organelle;intracellular organelle part;intracellular part;macromolecular complex;membrane;membrane-bounded organelle;membrane-bounded vesicle;mitochondrio…	Carbon fixation pathways in prokaryotes;Citrate cycle (TCA cycle)	ACEVEDO_LIVER_CANCER_UP;ACEVEDO_LIVER_TUMOR_VS_NORMAL_ADJACENT_TISSUE_UP;AGUIRRE_PANCREATIC_CANCER_COPY_NUMBER_UP;AKL_HTLV1_INFECTION_UP;BILD_SRC_ONCOGENIC_SIGNATURE;BLUM_RESPONSE_TO_SALIRASIB_DN;BOQUEST_STEM_CELL_CULTURED_VS_FRESH_UP;BOYAULT_LIVER_CANCER_SUBCLASS_G123_UP;CACGTG_V$MYC_Q2;CAGGTG_V$E12_Q6;CAIRO_HEPATOBLASTOMA_CLASSES_UP;CAIRO_HEPATOBLASTOMA_UP;CARBOHYDRATE_METABOLIC_PROCESS;CARBOXY…	GO:0005975;GO:0006082;GO:0006091;GO:0006101;GO:0006112;GO:0006139;GO:0006629;GO:0006637;GO:0006638;GO:0006639;GO:0006641;GO:0006662;GO:0006732;GO:0006753;GO:0006807;GO:0008152;GO:0008610;GO:0009058;GO:0009108;GO:0009116;GO:0009117;GO:0009119;GO:0009893;GO:0009987;GO:0015936;GO:0015980;GO:0018904;GO:0019222;GO:0019432;GO:0019752;GO:0031323;GO:0031325;GO:0033865;GO:0034641;GO:0035336;GO:0035337;GO:…	GO:0000166;GO:0003824;GO:0003878;GO:0004774;GO:0004775;GO:0005488;GO:0005524;GO:0016405;GO:0016740;GO:0016746;GO:0016874;GO:0016877;GO:0016878;GO:0017076;GO:0030554;GO:0032553;GO:0032555;GO:0032559;GO:0035639;GO:0043167;GO:0043169;GO:0046872;GO:0046912;GO:0048037	GO:0005654;GO:0005737;GO:0005739;GO:0005829;GO:0005886;GO:0009346;GO:0016020;GO:0031982;GO:0031988;GO:0032991;GO:0043226;GO:0043227;GO:0043229;GO:0043230;GO:0043231;GO:0043234;GO:0044421;GO:0044422;GO:0044424;GO:0044428;GO:0044444;GO:0044446;GO:0044464;GO:0065010;GO:0070062	REACT_1319;REACT_2122		43	43	43	45	45	45	120.84	0	182.73	11214000000	569	28.937	28.6731	28.7117	27.8973	27.2397	26.8995	31.6914	30.0758	30.6017	30.0597	29.6933	30.0116
	0.0357465	0.0436026		0.392186	-0.75349	ACOC_HUMAN	ACOC_HUMANCytoplasmicaconitatehydratase	P21399	ACOC_HUMAN Cytoplasmic aconitate hydratase	ACO1	ACO1	COG1048	4.2.1.3	acetyl-CoA catabolic process;acetyl-CoA metabolic process;biological regulation;carboxylic acid metabolic process;catabolic process;cation homeostasis;cellular catabolic process;cellular cation homeostasis;cellular chemical homeostasis;cellular homeostasis;cellular ion homeostasis;cellular iron ion homeostasis;cellular ketone metabolic process;cellular metabolic process;cellular metal ion homeost…	4 iron, 4 sulfur cluster binding;aconitate hydratase activity;binding;carbon-oxygen lyase activity;catalytic activity;cation binding;hydro-lyase activity;ion binding;iron-responsive element binding;iron-sulfur cluster binding;lyase activity;metal cluster binding;metal ion binding;mRNA binding;nucleic acid binding;RNA binding	cell part;cytoplasm;cytoplasmic part;cytosol;endoplasmic reticulum;extracellular membrane-bounded organelle;extracellular organelle;extracellular region part;extracellular vesicular exosome;Golgi apparatus;intracellular membrane-bounded organelle;intracellular organelle;intracellular part;membrane-bounded organelle;membrane-bounded vesicle;mitochondrion;organelle;vesicle	Carbon fixation pathways in prokaryotes;Citrate cycle (TCA cycle);Glyoxylate and dicarboxylate metabolism	BONOME_OVARIAN_CANCER_SURVIVAL_SUBOPTIMAL_DEBULKING;BOYAULT_LIVER_CANCER_SUBCLASS_G23_DN;BROWNE_HCMV_INFECTION_20HR_DN;CARBOHYDRATE_METABOLIC_PROCESS;CARBON_OXYGEN_LYASE_ACTIVITY;CARBOXYLIC_ACID_METABOLIC_PROCESS;CELLULAR_CARBOHYDRATE_METABOLIC_PROCESS;CHENG_RESPONSE_TO_NICKEL_ACETATE;chr9p21;CYTOPLASM;CYTOPLASMIC_PART;CYTOSOL;DAVICIONI_MOLECULAR_ARMS_VS_ERMS_UP;DIAZ_CHRONIC_MEYLOGENOUS_LEUKEMIA_…	GO:0003008;GO:0006082;GO:0006084;GO:0006099;GO:0006101;GO:0006417;GO:0006732;GO:0006873;GO:0006875;GO:0006879;GO:0008152;GO:0009056;GO:0009109;GO:0009791;GO:0009889;GO:0009987;GO:0010035;GO:0010038;GO:0010039;GO:0010040;GO:0010468;GO:0010556;GO:0010608;GO:0019222;GO:0019725;GO:0019752;GO:0022600;GO:0030003;GO:0031323;GO:0031326;GO:0032268;GO:0032501;GO:0032502;GO:0042180;GO:0042221;GO:0042592;GO:…	GO:0003676;GO:0003723;GO:0003729;GO:0003824;GO:0003994;GO:0005488;GO:0016829;GO:0016835;GO:0016836;GO:0030350;GO:0043167;GO:0043169;GO:0046872;GO:0051536;GO:0051539;GO:0051540	GO:0005737;GO:0005739;GO:0005783;GO:0005794;GO:0005829;GO:0031982;GO:0031988;GO:0043226;GO:0043227;GO:0043229;GO:0043230;GO:0043231;GO:0044421;GO:0044424;GO:0044444;GO:0044464;GO:0065010;GO:0070062			20	20	20	35	35	35	98.398	0	77.31	1304000000	139	27.2507	27.0436	27.4536	27.019	24.8453	24.8073	27.1224	26.7091	28.0473	24.3458	24.5724	25.493
	1.5426	0.759677		0.183582	-0.244893	ACON_HUMAN	ACON_HUMANAconitatehydratase,mitochondrial	Q99798	ACON_HUMAN Aconitate hydratase, mitochondrial	ACO2	ACO2	COG1048	4.2.1.3	acetyl-CoA catabolic process;acetyl-CoA metabolic process;carboxylic acid metabolic process;catabolic process;cellular catabolic process;cellular ketone metabolic process;cellular metabolic process;cellular process;citrate metabolic process;coenzyme catabolic process;coenzyme metabolic process;cofactor catabolic process;cofactor metabolic process;generation of precursor metabolites and energy;iso…	3 iron, 4 sulfur cluster binding;4 iron, 4 sulfur cluster binding;aconitate hydratase activity;binding;carbon-oxygen lyase activity;catalytic activity;cation binding;hydro-lyase activity;ion binding;iron ion binding;iron-sulfur cluster binding;lyase activity;metal cluster binding;metal ion binding;transition metal ion binding	cell part;cytoplasmic part;intracellular membrane-bounded organelle;intracellular organelle;intracellular organelle lumen;intracellular organelle part;intracellular part;membrane-bounded organelle;membrane-enclosed lumen;mitochondrial matrix;mitochondrial part;mitochondrion;nucleus;organelle;organelle lumen;organelle part	Carbon fixation pathways in prokaryotes;Citrate cycle (TCA cycle);Glyoxylate and dicarboxylate metabolism	AEROBIC_RESPIRATION;BENPORATH_MYC_TARGETS_WITH_EBOX;BENPORATH_NANOG_TARGETS;BENPORATH_SOX2_TARGETS;BIOCARTA_KREB_PATHWAY;BLALOCK_ALZHEIMERS_DISEASE_DN;BURTON_ADIPOGENESIS_5;CAMP_UP.V1_UP;CARBOHYDRATE_METABOLIC_PROCESS;CARBOXYLIC_ACID_METABOLIC_PROCESS;CATABOLIC_PROCESS;CATION_BINDING;CATTTCA,MIR-203;CELLULAR_CARBOHYDRATE_METABOLIC_PROCESS;CELLULAR_CATABOLIC_PROCESS;CELLULAR_RESPIRATION;chr22q13;C…	GO:0006082;GO:0006084;GO:0006091;GO:0006099;GO:0006101;GO:0006102;GO:0006732;GO:0008152;GO:0009056;GO:0009109;GO:0009987;GO:0019752;GO:0042180;GO:0043436;GO:0044237;GO:0044248;GO:0044281;GO:0046356;GO:0051186;GO:0051187;GO:0072350	GO:0003824;GO:0003994;GO:0005488;GO:0005506;GO:0016829;GO:0016835;GO:0016836;GO:0043167;GO:0043169;GO:0046872;GO:0046914;GO:0051536;GO:0051538;GO:0051539;GO:0051540	GO:0005634;GO:0005739;GO:0005759;GO:0031974;GO:0043226;GO:0043227;GO:0043229;GO:0043231;GO:0043233;GO:0044422;GO:0044424;GO:0044429;GO:0044444;GO:0044446;GO:0044464;GO:0070013	REACT_118595;REACT_1785		46	46	46	62.8	62.8	62.8	85.424	0	323.31	24445000000	1247	31.0806	31.1303	31.0872	30.7525	29.4402	29.2053	31.6902	31.5794	32.3075	29.8819	29.3781	29.4034
	0.571462	-0.31699		0.123996	-0.230064	ACOT1_HUMAN	ACOT1_HUMANAcyl-coenzymeAthioesterase1	Q86TX2	ACOT1_HUMAN Acyl-coenzyme A thioesterase 1	ACOT1	ACOT1	COG1073	3.1.2.2	acyl-CoA metabolic process;carboxylic acid metabolic process;cellular ketone metabolic process;cellular lipid metabolic process;cellular metabolic process;cellular process;coenzyme metabolic process;cofactor metabolic process;fatty acid metabolic process;lipid metabolic process;long-chain fatty acid metabolic process;metabolic process;monocarboxylic acid metabolic process;organic acid metabolic p…	acyl-CoA hydrolase activity;acyl-CoA thioesterase activity;carboxylic ester hydrolase activity;catalytic activity;CoA hydrolase activity;hydrolase activity;hydrolase activity, acting on ester bonds;palmitoyl-CoA hydrolase activity;thiolester hydrolase activity	cell part;cytoplasmic part;cytosol;intracellular part	Biosynthesis of unsaturated fatty acids	CAMPS_COLON_CANCER_COPY_NUMBER_DN;CARBOXYLIC_ACID_METABOLIC_PROCESS;CELLULAR_LIPID_METABOLIC_PROCESS;chr14q24;COENZYME_METABOLIC_PROCESS;COFACTOR_METABOLIC_PROCESS;CYTOPLASM;CYTOPLASMIC_PART;CYTOSOL;FATTY_ACID_METABOLIC_PROCESS;FUJIWARA_PARK2_HEPATOCYTE_PROLIFERATION_DN;GCNP_SHH_UP_LATE.V1_DN;GSE17721_CPG_VS_GARDIQUIMOD_0.5H_BMDM_UP;GSE17721_CTRL_VS_CPG_4H_BMDM_UP;GSE17721_CTRL_VS_PAM3CSK4_2H_BMD…	GO:0000038;GO:0001676;GO:0006082;GO:0006629;GO:0006631;GO:0006637;GO:0006732;GO:0008152;GO:0009987;GO:0019752;GO:0032787;GO:0035383;GO:0042180;GO:0043436;GO:0044237;GO:0044238;GO:0044255;GO:0044281;GO:0051186	GO:0003824;GO:0016289;GO:0016290;GO:0016291;GO:0016787;GO:0016788;GO:0016790;GO:0047617;GO:0052689	GO:0005829;GO:0044424;GO:0044444;GO:0044464			17	17	2	46.3	46.3	5.7	46.277	0	44.97	1014300000	110	26.8638	26.8393	27.072	26.3435	25.5768	24.9295	26.472	26.2857	27.0665	25.8692	24.3051	25.9852
	0.465305	0.178989		0.805058	0.463146	ACO13_HUMAN	ACO13_HUMANAcyl-coenzymeAthioesterase13	Q9NPJ3	ACO13_HUMAN Acyl-coenzyme A thioesterase 13	ACOT13	ACOT13	COG2050	3.1.2.-	cellular component assembly;cellular component organization;cellular component organization or biogenesis;macromolecular complex assembly;macromolecular complex subunit organization;metabolic process;protein complex assembly;protein complex subunit organization;protein homooligomerization;protein homotetramerization;protein oligomerization;protein tetramerization	acyl-CoA hydrolase activity;catalytic activity;CoA hydrolase activity;hydrolase activity;hydrolase activity, acting on ester bonds;thiolester hydrolase activity	cell part;cytoplasmic part;cytoskeletal part;cytosol;extracellular membrane-bounded organelle;extracellular organelle;extracellular region part;extracellular vesicular exosome;intracellular membrane-bounded organelle;intracellular non-membrane-bounded organelle;intracellular organelle;intracellular organelle part;intracellular part;membrane-bounded organelle;membrane-bounded vesicle;mitochondrion…		BLALOCK_ALZHEIMERS_DISEASE_DN;BONOME_OVARIAN_CANCER_SURVIVAL_OPTIMAL_DEBULKING;BRUINS_UVC_RESPONSE_LATE;BUYTAERT_PHOTODYNAMIC_THERAPY_STRESS_DN;chr6p22;FLECHNER_BIOPSY_KIDNEY_TRANSPLANT_OK_VS_DONOR_UP;FLECHNER_BIOPSY_KIDNEY_TRANSPLANT_REJECTED_VS_OK_DN;GSE13306_TREG_VS_TCONV_DN;GSE1432_6H_VS_24H_IFNG_MICROGLIA_DN;GSE14769_UNSTIM_VS_20MIN_LPS_BMDM_UP;GSE14769_UNSTIM_VS_60MIN_LPS_BMDM_UP;GSE14769_U…	GO:0006461;GO:0008152;GO:0016043;GO:0022607;GO:0043933;GO:0051259;GO:0051260;GO:0051262;GO:0051289;GO:0065003;GO:0071822;GO:0071840	GO:0003824;GO:0016289;GO:0016787;GO:0016788;GO:0016790;GO:0047617	GO:0005634;GO:0005739;GO:0005819;GO:0005829;GO:0031982;GO:0031988;GO:0043226;GO:0043227;GO:0043228;GO:0043229;GO:0043230;GO:0043231;GO:0043232;GO:0044421;GO:0044422;GO:0044424;GO:0044430;GO:0044444;GO:0044446;GO:0044464;GO:0065010;GO:0070062			3	3	3	21.4	21.4	21.4	14.96	0	6.1657	881400000	80	26.6608	26.2178	26.6108	25.2656	25.3418	24.8648	26.7932	26.4993	26.734	25.4261	25.3738	26.0617
	0.919497	14.74		0	0	ACOT2_HUMAN	ACOT2_HUMANAcyl-coenzymeAthioesterase2,mitochondrial	P49753	ACOT2_HUMAN Acyl-coenzyme A thioesterase 2, mitochondrial	ACOT2	ACOT2		3.1.2.2	acyl-CoA metabolic process;carboxylic acid metabolic process;cellular ketone metabolic process;cellular lipid metabolic process;cellular metabolic process;cellular process;coenzyme metabolic process;cofactor metabolic process;fatty acid metabolic process;lipid metabolic process;long-chain fatty acid metabolic process;metabolic process;monocarboxylic acid metabolic process;organic acid metabolic p…	acyl-CoA hydrolase activity;acyl-CoA thioesterase activity;binding;carboxylic ester hydrolase activity;catalytic activity;CoA hydrolase activity;hydrolase activity;hydrolase activity, acting on ester bonds;palmitoyl-CoA hydrolase activity;protein binding;receptor binding;thiolester hydrolase activity	cell part;cytoplasmic part;extracellular membrane-bounded organelle;extracellular organelle;extracellular region part;extracellular vesicular exosome;intracellular membrane-bounded organelle;intracellular organelle;intracellular part;membrane-bounded organelle;membrane-bounded vesicle;mitochondrion;organelle;vesicle	Biosynthesis of unsaturated fatty acids	ACEVEDO_FGFR1_TARGETS_IN_PROSTATE_CANCER_MODEL_DN;CARBOXYLIC_ACID_METABOLIC_PROCESS;CELLULAR_LIPID_METABOLIC_PROCESS;chr14q24;COENZYME_METABOLIC_PROCESS;COFACTOR_METABOLIC_PROCESS;CYTOPLASM;CYTOPLASMIC_PART;DACOSTA_UV_RESPONSE_VIA_ERCC3_COMMON_UP;FATTY_ACID_METABOLIC_PROCESS;GAUSSMANN_MLL_AF4_FUSION_TARGETS_A_DN;GSE14769_UNSTIM_VS_80MIN_LPS_BMDM_UP;GSE17721_PAM3CSK4_VS_CPG_2H_BMDM_DN;GSE17721_POL…	GO:0000038;GO:0001676;GO:0006082;GO:0006629;GO:0006631;GO:0006637;GO:0006732;GO:0008152;GO:0009987;GO:0019752;GO:0032787;GO:0035383;GO:0042180;GO:0043436;GO:0044237;GO:0044238;GO:0044255;GO:0044281;GO:0051186	GO:0003824;GO:0005102;GO:0005488;GO:0005515;GO:0016289;GO:0016290;GO:0016291;GO:0016787;GO:0016788;GO:0016790;GO:0047617;GO:0052689	GO:0005739;GO:0031982;GO:0031988;GO:0043226;GO:0043227;GO:0043229;GO:0043230;GO:0043231;GO:0044421;GO:0044424;GO:0044444;GO:0044464;GO:0065010;GO:0070062			16	1	1	40.4	5	5	53.218	0.00043103	3.6853	23079000	2	0.001	0.001	0.001	0.001	0.001	0.001	24.4009	19.821	0.001	0.001	0.001	0.001
+	3.10822	6.00273	+	2.0301	5.66184	BACH_HUMAN	BACH_HUMANCytosolicacylcoenzymeAthioesterhydrolase	O00154	BACH_HUMAN Cytosolic acyl coenzyme A thioester hydrolase	ACOT7	ACOT7	COG1607	3.1.2.2	biosynthetic process;carboxylic acid biosynthetic process;carboxylic acid catabolic process;carboxylic acid metabolic process;catabolic process;cellular biosynthetic process;cellular catabolic process;cellular ketone metabolic process;cellular lipid catabolic process;cellular lipid metabolic process;cellular metabolic process;cellular nitrogen compound metabolic process;cellular process;coenzyme …	acyl-CoA thioesterase activity;binding;carboxylic acid binding;carboxylic ester hydrolase activity;catalytic activity;CoA hydrolase activity;coenzyme binding;cofactor binding;fatty acid binding;fatty-acyl-CoA binding;hydrolase activity;hydrolase activity, acting on ester bonds;identical protein binding;lipid binding;monocarboxylic acid binding;palmitoyl-CoA hydrolase activity;protein binding;prot…	cell body;cell part;cell projection;cytoplasm;cytoplasmic part;cytosol;extracellular membrane-bounded organelle;extracellular organelle;extracellular region part;extracellular vesicular exosome;intracellular membrane-bounded organelle;intracellular organelle;intracellular organelle part;intracellular part;membrane-bounded organelle;membrane-bounded vesicle;mitochondrion;neuron projection;nuclear …	Biosynthesis of unsaturated fatty acids	ACCAAAG,MIR-9;ATGAAGG,MIR-205;BERENJENO_TRANSFORMED_BY_RHOA_UP;BILD_HRAS_ONCOGENIC_SIGNATURE;BLALOCK_ALZHEIMERS_DISEASE_DN;BONOME_OVARIAN_CANCER_POOR_SURVIVAL_DN;BONOME_OVARIAN_CANCER_SURVIVAL_SUBOPTIMAL_DEBULKING;CAGTGTT,MIR-141,MIR-200A;CHIARADONNA_NEOPLASTIC_TRANSFORMATION_CDC25_DN;CHIARADONNA_NEOPLASTIC_TRANSFORMATION_KRAS_CDC25_UP;CHICAS_RB1_TARGETS_CONFLUENT;CHICAS_RB1_TARGETS_SENESCENT;chr…	GO:0006082;GO:0006139;GO:0006629;GO:0006631;GO:0006633;GO:0006732;GO:0006753;GO:0006807;GO:0008152;GO:0008610;GO:0009056;GO:0009058;GO:0009062;GO:0009108;GO:0009116;GO:0009117;GO:0009119;GO:0009987;GO:0015936;GO:0015937;GO:0016042;GO:0016053;GO:0016054;GO:0019752;GO:0032787;GO:0033865;GO:0034641;GO:0042180;GO:0042278;GO:0043436;GO:0044237;GO:0044238;GO:0044242;GO:0044248;GO:0044249;GO:0044255;GO:…	GO:0000062;GO:0003824;GO:0005488;GO:0005504;GO:0005515;GO:0008289;GO:0016289;GO:0016290;GO:0016291;GO:0016787;GO:0016788;GO:0016790;GO:0031406;GO:0033293;GO:0042802;GO:0042803;GO:0046983;GO:0048037;GO:0050662;GO:0052689	GO:0005654;GO:0005737;GO:0005739;GO:0005829;GO:0031982;GO:0031988;GO:0042995;GO:0043005;GO:0043226;GO:0043227;GO:0043229;GO:0043230;GO:0043231;GO:0044297;GO:0044421;GO:0044422;GO:0044424;GO:0044428;GO:0044444;GO:0044446;GO:0044464;GO:0065010;GO:0070062			11	11	11	30	30	30	41.796	0	40.557	1503000000	86	21.115	23.2366	22.7513	23.6248	20.9469	19.5591	28.3457	28.1717	28.5936	27.3363	26.7419	27.0381
	0.934902	-14.4067		0	0	ACOT8_HUMAN	ACOT8_HUMANAcyl-coenzymeAthioesterase8	O14734	ACOT8_HUMAN Acyl-coenzyme A thioesterase 8	ACOT8	ACOT8	COG1946	3.1.2.27	acyl-CoA metabolic process;bile acid biosynthetic process;bile acid metabolic process;biosynthetic process;carboxylic acid biosynthetic process;carboxylic acid catabolic process;carboxylic acid metabolic process;catabolic process;cellular biosynthetic process;cellular catabolic process;cellular component organization;cellular component organization at cellular level;cellular component organizatio…	acyl-CoA hydrolase activity;acyl-CoA thioesterase activity;binding;carboxylic ester hydrolase activity;catalytic activity;choloyl-CoA hydrolase activity;CoA hydrolase activity;hydrolase activity;hydrolase activity, acting on ester bonds;palmitoyl-CoA hydrolase activity;protein binding;receptor binding;thiolester hydrolase activity	cell part;cytoplasmic part;intracellular membrane-bounded organelle;intracellular organelle;intracellular organelle lumen;intracellular organelle part;intracellular part;membrane-bounded organelle;membrane-enclosed lumen;microbody lumen;microbody part;mitochondrion;organelle;organelle lumen;organelle part;peroxisomal matrix;peroxisomal part	Peroxisome	BENPORATH_NANOG_TARGETS;BENPORATH_SOX2_TARGETS;CHIARETTI_ACUTE_LYMPHOBLASTIC_LEUKEMIA_ZAP70;chr20q13;CYTOPLASM;CYTOPLASMIC_PART;DODD_NASOPHARYNGEAL_CARCINOMA_UP;ESC_V6.5_UP_LATE.V1_DN;FOSTER_KDM1A_TARGETS_DN;GATTGGY_V$NFY_Q6_01;GCM_CHUK;GCM_DENR;GGGTGGRR_V$PAX4_03;GSE12845_IGD_NEG_BLOOD_VS_PRE_GC_TONSIL_BCELL_UP;GSE13484_12H_VS_3H_YF17D_VACCINE_STIM_PBMC_UP;GSE13484_UNSTIM_VS_3H_YF17D_VACCINE_STI…	GO:0006082;GO:0006629;GO:0006631;GO:0006635;GO:0006637;GO:0006694;GO:0006699;GO:0006732;GO:0006996;GO:0008152;GO:0008202;GO:0008206;GO:0008610;GO:0009056;GO:0009058;GO:0009062;GO:0009987;GO:0016032;GO:0016042;GO:0016043;GO:0016053;GO:0016054;GO:0016559;GO:0019395;GO:0019752;GO:0030258;GO:0032787;GO:0033540;GO:0033559;GO:0034440;GO:0035383;GO:0042180;GO:0043436;GO:0043648;GO:0043649;GO:0044237;GO:…	GO:0003824;GO:0005102;GO:0005488;GO:0005515;GO:0016289;GO:0016290;GO:0016291;GO:0016787;GO:0016788;GO:0016790;GO:0033882;GO:0047617;GO:0052689	GO:0005739;GO:0005782;GO:0031907;GO:0031974;GO:0043226;GO:0043227;GO:0043229;GO:0043231;GO:0043233;GO:0044422;GO:0044424;GO:0044438;GO:0044439;GO:0044444;GO:0044446;GO:0044464;GO:0070013	REACT_11041;REACT_121147;REACT_17017;REACT_17062		2	2	2	9.4	9.4	9.4	35.914	0.008836	1.8694	6505500	3	21.3579	21.8643	0.001	0.001	0.001	0.001	0.001	0.001	0.001	0.001	0.001	0.001
	1.58214	1.18876		0.513367	0.835244	ACOT9_HUMAN	ACOT9_HUMANAcyl-coenzymeAthioesterase9,mitochondrial	Q9Y305	ACOT9_HUMAN Acyl-coenzyme A thioesterase 9, mitochondrial	ACOT9	ACOT9	NOG269414	3.1.2.-	acyl-CoA metabolic process;cellular metabolic process;cellular process;coenzyme metabolic process;cofactor metabolic process;metabolic process;thioester metabolic process	acetyl-CoA hydrolase activity;carboxylic ester hydrolase activity;catalytic activity;CoA hydrolase activity;hydrolase activity;hydrolase activity, acting on ester bonds;thiolester hydrolase activity	cell part;cytoplasmic part;intracellular membrane-bounded organelle;intracellular organelle;intracellular part;membrane-bounded organelle;mitochondrion;organelle		ACEVEDO_LIVER_TUMOR_VS_NORMAL_ADJACENT_TISSUE_UP;AKT_UP.V1_UP;BERENJENO_TRANSFORMED_BY_RHOA_UP;BRUINS_UVC_RESPONSE_LATE;BRUINS_UVC_RESPONSE_VIA_TP53_GROUP_A;CARBOXYLIC_ACID_METABOLIC_PROCESS;CASORELLI_ACUTE_PROMYELOCYTIC_LEUKEMIA_DN;CELLULAR_LIPID_METABOLIC_PROCESS;CHEN_METABOLIC_SYNDROM_NETWORK;chrxp22;COENZYME_METABOLIC_PROCESS;COFACTOR_METABOLIC_PROCESS;CYTOPLASM;CYTOPLASMIC_PART;DAVICIONI_MOL…	GO:0006637;GO:0006732;GO:0008152;GO:0009987;GO:0035383;GO:0044237;GO:0051186	GO:0003824;GO:0003986;GO:0016289;GO:0016787;GO:0016788;GO:0016790;GO:0052689	GO:0005739;GO:0043226;GO:0043227;GO:0043229;GO:0043231;GO:0044424;GO:0044444;GO:0044464			19	19	19	54.4	54.4	54.4	49.901	0	67.562	1905500000	193	27.3263	26.8023	26.8008	27.1158	25.4866	24.9484	28.6732	27.6431	28.1794	26.1608	26.7325	27.1634
	2.34404	3.63498	+	1.11185	15.8825	ACOX1_HUMAN	ACOX1_HUMANPeroxisomalacyl-coenzymeAoxidase1	Q15067	ACOX1_HUMAN Peroxisomal acyl-coenzyme A oxidase 1	ACOX1	ACOX1	COG1960	1.3.3.6	biological regulation;carboxylic acid catabolic process;carboxylic acid metabolic process;catabolic process;cellular catabolic process;cellular component organization;cellular component organization at cellular level;cellular component organization or biogenesis;cellular component organization or biogenesis at cellular level;cellular ketone metabolic process;cellular lipid catabolic process;cellu…	acyl-CoA dehydrogenase activity;acyl-CoA oxidase activity;binding;carboxylic acid binding;catalytic activity;coenzyme binding;cofactor binding;FAD binding;fatty acid binding;flavin adenine dinucleotide binding;lipid binding;monocarboxylic acid binding;oxidoreductase activity;oxidoreductase activity, acting on the CH-CH group of donors;oxidoreductase activity, acting on the CH-CH group of donors, …	cell part;cytoplasmic part;intracellular membrane-bounded organelle;intracellular non-membrane-bounded organelle;intracellular organelle;intracellular organelle lumen;intracellular organelle part;intracellular part;membrane;membrane-bounded organelle;membrane-enclosed lumen;microbody;microbody lumen;microbody membrane;microbody part;mitochondrion;non-membrane-bounded organelle;nuclear part;nucleo…	alpha-Linolenic acid metabolism;Biosynthesis of unsaturated fatty acids;Fatty acid metabolism;Peroxisome;PPAR signaling pathway	AFFAR_YY1_TARGETS_UP;BENPORATH_MYC_TARGETS_WITH_EBOX;BENPORATH_SOX2_TARGETS;BIOCARTA_PPARA_PATHWAY;BOGNI_TREATMENT_RELATED_MYELOID_LEUKEMIA_DN;BROWNE_HCMV_INFECTION_14HR_DN;BROWNE_HCMV_INFECTION_24HR_DN;BROWNE_HCMV_INFECTION_6HR_DN;BYSTRYKH_HEMATOPOIESIS_STEM_CELL_QTL_TRANS;CHIANG_LIVER_CANCER_SUBCLASS_INTERFERON_DN;CHIANG_LIVER_CANCER_SUBCLASS_UNANNOTATED_UP;chr17q24;CREIGHTON_ENDOCRINE_THERAPY_…	GO:0000038;GO:0006082;GO:0006091;GO:0006629;GO:0006631;GO:0006635;GO:0006690;GO:0006692;GO:0006693;GO:0006996;GO:0007276;GO:0007283;GO:0008152;GO:0009056;GO:0009062;GO:0009987;GO:0016042;GO:0016043;GO:0016054;GO:0016559;GO:0019395;GO:0019752;GO:0022414;GO:0030258;GO:0032501;GO:0032787;GO:0032844;GO:0032846;GO:0033540;GO:0033559;GO:0034440;GO:0042180;GO:0042592;GO:0043436;GO:0044237;GO:0044238;GO:…	GO:0003824;GO:0003995;GO:0003997;GO:0005102;GO:0005488;GO:0005504;GO:0005515;GO:0008289;GO:0016401;GO:0016491;GO:0016627;GO:0016634;GO:0019904;GO:0030165;GO:0031406;GO:0033293;GO:0047485;GO:0048037;GO:0050660;GO:0050662;GO:0071949	GO:0005634;GO:0005654;GO:0005730;GO:0005739;GO:0005777;GO:0005778;GO:0005782;GO:0005886;GO:0016020;GO:0031090;GO:0031903;GO:0031907;GO:0031974;GO:0042579;GO:0043226;GO:0043227;GO:0043228;GO:0043229;GO:0043231;GO:0043232;GO:0043233;GO:0044422;GO:0044424;GO:0044428;GO:0044438;GO:0044439;GO:0044444;GO:0044446;GO:0044464;GO:0070013	REACT_116145;REACT_121147;REACT_17062		8	8	8	23.6	23.6	23.6	74.423	0	66.133	420130000	28	22.0335	23.3745	23.9977	0.001	19.6532	0.001	26.3151	26.8107	27.1849	24.3588	19.5076	23.4363
	1.33115	2.62166	+	4.78724	-24.3651	ACOX3_HUMAN	ACOX3_HUMANPeroxisomalacyl-coenzymeAoxidase3	O15254	ACOX3_HUMAN Peroxisomal acyl-coenzyme A oxidase 3	ACOX3	ACOX3	COG1960	1.3.3.6	carboxylic acid catabolic process;carboxylic acid metabolic process;catabolic process;cellular catabolic process;cellular ketone metabolic process;cellular lipid catabolic process;cellular lipid metabolic process;cellular metabolic process;cellular process;fatty acid beta-oxidation;fatty acid beta-oxidation using acyl-CoA oxidase;fatty acid catabolic process;fatty acid metabolic process;fatty aci…	acyl-CoA dehydrogenase activity;acyl-CoA oxidase activity;binding;catalytic activity;coenzyme binding;cofactor binding;flavin adenine dinucleotide binding;oxidoreductase activity;oxidoreductase activity, acting on the CH-CH group of donors;oxidoreductase activity, acting on the CH-CH group of donors, oxygen as acceptor;pristanoyl-CoA oxidase activity;protein binding;receptor binding	cell part;cytoplasmic part;intracellular membrane-bounded organelle;intracellular organelle;intracellular organelle lumen;intracellular organelle part;intracellular part;membrane;membrane-bounded organelle;membrane-enclosed lumen;microbody;microbody lumen;microbody part;mitochondrion;organelle;organelle lumen;organelle part;peroxisomal matrix;peroxisomal part;peroxisome	alpha-Linolenic acid metabolism;Biosynthesis of unsaturated fatty acids;Fatty acid metabolism;Peroxisome;PPAR signaling pathway	ACEVEDO_LIVER_CANCER_DN;ACEVEDO_LIVER_TUMOR_VS_NORMAL_ADJACENT_TISSUE_DN;BENPORATH_MYC_MAX_TARGETS;BILE_ACID_METABOLIC_PROCESS;BLALOCK_ALZHEIMERS_DISEASE_UP;CAGGTG_V$E12_Q6;CARBOXYLIC_ACID_METABOLIC_PROCESS;CELLULAR_LIPID_METABOLIC_PROCESS;chr4p15;CYTOPLASM;CYTOPLASMIC_PART;DANG_BOUND_BY_MYC;DUTERTRE_ESTRADIOL_RESPONSE_24HR_DN;FATTY_ACID_METABOLIC_PROCESS;FIGUEROA_AML_METHYLATION_CLUSTER_6_UP;GRA…	GO:0006082;GO:0006629;GO:0006631;GO:0006635;GO:0008152;GO:0009056;GO:0009062;GO:0009987;GO:0016042;GO:0016054;GO:0019395;GO:0019752;GO:0030258;GO:0032787;GO:0033540;GO:0034440;GO:0042180;GO:0043436;GO:0044237;GO:0044238;GO:0044242;GO:0044248;GO:0044255;GO:0044281;GO:0044282;GO:0046395;GO:0055114;GO:0072329	GO:0003824;GO:0003995;GO:0003997;GO:0005102;GO:0005488;GO:0005515;GO:0016402;GO:0016491;GO:0016627;GO:0016634;GO:0048037;GO:0050660;GO:0050662	GO:0005739;GO:0005777;GO:0005782;GO:0016020;GO:0031907;GO:0031974;GO:0042579;GO:0043226;GO:0043227;GO:0043229;GO:0043231;GO:0043233;GO:0044422;GO:0044424;GO:0044438;GO:0044439;GO:0044444;GO:0044446;GO:0044464;GO:0070013	REACT_17017		8	8	8	18.7	18.7	18.7	77.628	0	8.825	397300000	15	23.9375	24.2405	22.1514	26.3458	23.2572	23.4952	26.5448	24.7756	26.8741	0.001	0.001	0.001
	0.615822	-0.23722		0.149244	0.214073	PPAC_HUMAN	PPAC_HUMANLowmolecularweightphosphotyrosineproteinphosphatase	P24666	PPAC_HUMAN Low molecular weight phosphotyrosine protein phosphatase	ACP1	ACP1	COG0394	3.1.3.2;3.1.3.48		acid phosphatase activity;catalytic activity;hydrolase activity;hydrolase activity, acting on ester bonds;non-membrane spanning protein tyrosine phosphatase activity;phosphatase activity;phosphoprotein phosphatase activity;phosphoric ester hydrolase activity;protein tyrosine phosphatase activity	cell part;cytoplasm;extracellular membrane-bounded organelle;extracellular organelle;extracellular region part;extracellular vesicular exosome;internal side of plasma membrane;intracellular part;membrane part;membrane-bounded organelle;membrane-bounded vesicle;organelle;plasma membrane part;vesicle	Riboflavin metabolism	AAGCAAT,MIR-137;ACEVEDO_LIVER_CANCER_UP;ACEVEDO_LIVER_TUMOR_VS_NORMAL_ADJACENT_TISSUE_UP;BLALOCK_ALZHEIMERS_DISEASE_DN;CAIRO_HEPATOBLASTOMA_CLASSES_UP;CASORELLI_ACUTE_PROMYELOCYTIC_LEUKEMIA_DN;CELL_FRACTION;CHEN_NEUROBLASTOMA_COPY_NUMBER_GAINS;chr2p25;CHYLA_CBFA2T3_TARGETS_DN;DIAZ_CHRONIC_MEYLOGENOUS_LEUKEMIA_UP;FEVR_CTNNB1_TARGETS_DN;FUKUSHIMA_TNFSF11_TARGETS;GROSS_HYPOXIA_VIA_ELK3_AND_HIF1A_DN;…		GO:0003824;GO:0003993;GO:0004721;GO:0004725;GO:0004726;GO:0016787;GO:0016788;GO:0016791;GO:0042578	GO:0005737;GO:0009898;GO:0031982;GO:0031988;GO:0043226;GO:0043227;GO:0043230;GO:0044421;GO:0044424;GO:0044425;GO:0044459;GO:0044464;GO:0065010;GO:0070062		SM00226	9	9	9	56.3	56.3	56.3	18.042	0	192.56	2781400000	231	28.3028	28.2796	28.4591	27.8978	26.3505	26.4729	28.381	27.8158	28.1332	27.5011	26.8395	27.0227
	3.49543	-1.98075		0.0363622	1.02871	ACSF2_HUMAN	ACSF2_HUMANAcyl-CoAsynthetasefamilymember2,mitochondrial	Q96CM8	ACSF2_HUMAN Acyl-CoA synthetase family member 2, mitochondrial	ACSF2	ACSF2	COG0318	6.2.1.-	carboxylic acid metabolic process;cellular ketone metabolic process;cellular lipid metabolic process;cellular metabolic process;cellular process;fatty acid metabolic process;lipid metabolic process;metabolic process;monocarboxylic acid metabolic process;organic acid metabolic process;oxoacid metabolic process;primary metabolic process;small molecule metabolic process	adenyl nucleotide binding;adenyl ribonucleotide binding;ATP binding;binding;catalytic activity;ligase activity;nucleotide binding;purine nucleotide binding;purine ribonucleoside triphosphate binding;purine ribonucleotide binding;ribonucleotide binding	cell part;cytoplasmic part;intracellular membrane-bounded organelle;intracellular organelle;intracellular part;membrane-bounded organelle;mitochondrion;organelle		AACTTT_UNKNOWN;AGUIRRE_PANCREATIC_CANCER_COPY_NUMBER_UP;chr17q21;DELYS_THYROID_CANCER_DN;GOZGIT_ESR1_TARGETS_UP;GSE12845_IGD_NEG_BLOOD_VS_PRE_GC_TONSIL_BCELL_UP;GSE12845_IGD_POS_VS_NEG_BLOOD_BCELL_DN;GSE13229_IMM_VS_INTMATURE_NKCELL_UP;GSE14308_TH2_VS_NATURAL_TREG_DN;GSE17721_0.5H_VS_12H_PAM3CSK4_BMDM_UP;GSE17721_12H_VS_24H_PAM3CSK4_BMDM_DN;GSE17721_CTRL_VS_CPG_2H_BMDM_DN;GSE17721_CTRL_VS_PAM3CSK…	GO:0006082;GO:0006629;GO:0006631;GO:0008152;GO:0009987;GO:0019752;GO:0032787;GO:0042180;GO:0043436;GO:0044237;GO:0044238;GO:0044255;GO:0044281	GO:0000166;GO:0003824;GO:0005488;GO:0005524;GO:0016874;GO:0017076;GO:0030554;GO:0032553;GO:0032555;GO:0032559;GO:0035639	GO:0005739;GO:0043226;GO:0043227;GO:0043229;GO:0043231;GO:0044424;GO:0044444;GO:0044464			4	4	4	10.9	10.9	10.9	68.124	0	7.8354	35387000	8	22.854	22.6155	23.0384	21.3222	17.4751	0.001	21.067	20.6521	20.8465	0.001	21.3967	20.4868
	0.052606	-0.0347004		0.494626	-0.760921	ACSF3_HUMAN	ACSF3_HUMANAcyl-CoAsynthetasefamilymember3,mitochondrial	Q4G176	ACSF3_HUMAN Acyl-CoA synthetase family member 3, mitochondrial	ACSF3	ACSF3	COG0318	6.2.1.-	biosynthetic process;carboxylic acid biosynthetic process;carboxylic acid catabolic process;carboxylic acid metabolic process;catabolic process;cellular biosynthetic process;cellular catabolic process;cellular ketone metabolic process;cellular lipid metabolic process;cellular metabolic process;cellular process;dicarboxylic acid catabolic process;dicarboxylic acid metabolic process;fatty acid bios…	acid-thiol ligase activity;adenyl nucleotide binding;adenyl ribonucleotide binding;ATP binding;binding;catalytic activity;ligase activity;ligase activity, forming carbon-sulfur bonds;malonyl-CoA synthetase activity;nucleotide binding;purine nucleotide binding;purine ribonucleoside triphosphate binding;purine ribonucleotide binding;ribonucleotide binding	cell part;cytoplasmic part;intracellular membrane-bounded organelle;intracellular organelle;intracellular part;membrane-bounded organelle;mitochondrion;organelle		chr16q24;GEORGES_TARGETS_OF_MIR192_AND_MIR215;GSE10094_LCMV_VS_LISTERIA_IND_EFF_CD4_TCELL_UP;GSE10239_KLRG1INT_VS_KLRG1HIGH_EFF_CD8_TCELL_UP;GSE14350_TREG_VS_TEFF_IN_IL2RB_KO_DN;GSE17721_LPS_VS_PAM3CSK4_0.5H_BMDM_UP;GSE20366_CD103_POS_VS_NEG_TREG_KLRG1NEG_UP;GSE7852_TREG_VS_TCONV_FAT_UP;IVANOVA_HEMATOPOIESIS_STEM_CELL_AND_PROGENITOR;MARTENS_BOUND_BY_PML_RARA_FUSION;MATSUDA_NATURAL_KILLER_DIFFEREN…	GO:0006082;GO:0006629;GO:0006631;GO:0006633;GO:0008152;GO:0008610;GO:0009056;GO:0009058;GO:0009987;GO:0016053;GO:0016054;GO:0019752;GO:0032787;GO:0042180;GO:0043436;GO:0043648;GO:0043649;GO:0044237;GO:0044238;GO:0044248;GO:0044249;GO:0044255;GO:0044281;GO:0044282;GO:0044283;GO:0046394;GO:0046395;GO:0090410	GO:0000166;GO:0003824;GO:0005488;GO:0005524;GO:0016874;GO:0016877;GO:0016878;GO:0017076;GO:0030554;GO:0032553;GO:0032555;GO:0032559;GO:0035639;GO:0090409	GO:0005739;GO:0043226;GO:0043227;GO:0043229;GO:0043231;GO:0044424;GO:0044444;GO:0044464			19	19	19	41.1	41.1	41.1	64.129	0	46.774	945030000	98	26.709	26.8484	27.066	26.4011	24.7746	24.3221	26.4814	26.8579	27.18	24.3568	24.0372	24.8211
	0.315267	8.26465		0	0	ACSL1_HUMAN	ACSL1_HUMANLong-chain-fatty-acid--CoAligase1	P33121	ACSL1_HUMAN Long-chain-fatty-acid--CoA ligase 1	ACSL1	ACSL1	COG1022	6.2.1.3	acyl-CoA biosynthetic process;acyl-CoA metabolic process;acylglycerol biosynthetic process;acylglycerol metabolic process;adiponectin-mediated signaling pathway;biological regulation;biosynthetic process;carboxylic acid metabolic process;catabolic process;cell surface receptor linked signaling pathway;cellular biosynthetic process;cellular catabolic process;cellular ketone metabolic process;cellu…	adenyl nucleotide binding;adenyl ribonucleotide binding;ATP binding;binding;catalytic activity;fatty acid ligase activity;ligase activity;ligase activity, forming carbon-sulfur bonds;long-chain fatty acid-CoA ligase activity;nucleotide binding;purine nucleotide binding;purine ribonucleoside triphosphate binding;purine ribonucleotide binding;ribonucleotide binding	cell part;cytoplasmic part;endoplasmic reticulum membrane;endoplasmic reticulum part;integral to membrane;intracellular membrane-bounded organelle;intracellular organelle;intracellular organelle part;intracellular part;intrinsic to membrane;membrane;membrane part;membrane-bounded organelle;microbody;microbody membrane;microbody part;mitochondrial membrane;mitochondrial outer membrane;mitochondria…	Adipocytokine signaling pathway;Fatty acid metabolism;Peroxisome;PPAR signaling pathway	AAGCACA,MIR-218;ACEVEDO_METHYLATED_IN_LIVER_CANCER_DN;ACTGCCT,MIR-34B;AMBROSINI_FLAVOPIRIDOL_TREATMENT_TP53;ATGAAGG,MIR-205;BILANGES_RAPAMYCIN_SENSITIVE_GENES;BLALOCK_ALZHEIMERS_DISEASE_UP;BOCHKIS_FOXA2_TARGETS;BURTON_ADIPOGENESIS_5;CACTGCC,MIR-34A,MIR-34C,MIR-449;CAGTCAC,MIR-134;CAIRO_HEPATOBLASTOMA_DN;CAIRO_LIVER_DEVELOPMENT_DN;CEBALLOS_TARGETS_OF_TP53_AND_MYC_UP;CHARAFE_BREAST_CANCER_BASAL_VS_…	GO:0001676;GO:0001932;GO:0006082;GO:0006629;GO:0006631;GO:0006637;GO:0006638;GO:0006639;GO:0006641;GO:0006662;GO:0006732;GO:0006805;GO:0007165;GO:0007166;GO:0007584;GO:0008152;GO:0008610;GO:0009056;GO:0009058;GO:0009108;GO:0009605;GO:0009987;GO:0009991;GO:0010033;GO:0014070;GO:0018904;GO:0019220;GO:0019221;GO:0019222;GO:0019432;GO:0019752;GO:0031323;GO:0031399;GO:0031667;GO:0032268;GO:0032787;GO:…	GO:0000166;GO:0003824;GO:0004467;GO:0005488;GO:0005524;GO:0015645;GO:0016874;GO:0016877;GO:0017076;GO:0030554;GO:0032553;GO:0032555;GO:0032559;GO:0035639	GO:0005739;GO:0005741;GO:0005778;GO:0005789;GO:0005886;GO:0016020;GO:0016021;GO:0019867;GO:0031090;GO:0031224;GO:0031903;GO:0031966;GO:0031968;GO:0042579;GO:0043226;GO:0043227;GO:0043229;GO:0043231;GO:0044422;GO:0044424;GO:0044425;GO:0044429;GO:0044432;GO:0044438;GO:0044439;GO:0044444;GO:0044446;GO:0044464	REACT_116145;REACT_121100;REACT_121147;REACT_380		3	3	3	7.3	7.3	7.3	77.942	0.0004414	4.325	30094000	4	0.001	0.001	22.0242	0.001	0.001	0.001	0.001	22.6064	24.2127	0.001	0.001	0.001
	2.09951	1.51017		0.130089	-0.352464	ACSL3_HUMAN	ACSL3_HUMANLong-chain-fatty-acid--CoAligase3	O95573	ACSL3_HUMAN Long-chain-fatty-acid--CoA ligase 3	ACSL3	ACSL3	COG1022	6.2.1.3	acyl-CoA biosynthetic process;acyl-CoA metabolic process;acylglycerol biosynthetic process;acylglycerol metabolic process;anatomical structure development;biological regulation;biosynthetic process;brain development;carboxylic acid biosynthetic process;carboxylic acid metabolic process;cellular biosynthetic process;cellular component assembly;cellular component organization;cellular component org…	adenyl nucleotide binding;adenyl ribonucleotide binding;ATP binding;binding;catalytic activity;enzyme binding;fatty acid ligase activity;kinase binding;ligase activity;ligase activity, forming carbon-sulfur bonds;long-chain fatty acid-CoA ligase activity;nucleotide binding;protein binding;protein domain specific binding;protein kinase binding;purine nucleotide binding;purine ribonucleoside tripho…	cell part;cytoplasmic part;endoplasmic reticulum;endoplasmic reticulum membrane;endoplasmic reticulum part;Golgi apparatus;integral to membrane;intracellular membrane-bounded organelle;intracellular organelle;intracellular organelle part;intracellular part;intrinsic to membrane;lipid particle;membrane;membrane part;membrane-bounded organelle;microbody;microbody membrane;microbody part;mitochondri…	Adipocytokine signaling pathway;Fatty acid metabolism;Peroxisome;PPAR signaling pathway	ALONSO_METASTASIS_UP;ASTIER_INTEGRIN_SIGNALING;ATAGGAA,MIR-202;BAELDE_DIABETIC_NEPHROPATHY_DN;BERTUCCI_MEDULLARY_VS_DUCTAL_BREAST_CANCER_DN;BLALOCK_ALZHEIMERS_DISEASE_DN;BONOME_OVARIAN_CANCER_SURVIVAL_SUBOPTIMAL_DEBULKING;BROWNE_HCMV_INFECTION_12HR_DN;CAIRO_HEPATOBLASTOMA_CLASSES_UP;CASORELLI_ACUTE_PROMYELOCYTIC_LEUKEMIA_DN;CEBALLOS_TARGETS_OF_TP53_AND_MYC_UP;CHANG_CORE_SERUM_RESPONSE_DN;chr2q34;…	GO:0001676;GO:0006082;GO:0006629;GO:0006631;GO:0006633;GO:0006637;GO:0006638;GO:0006639;GO:0006641;GO:0006662;GO:0006732;GO:0007420;GO:0007584;GO:0008152;GO:0008610;GO:0009058;GO:0009108;GO:0009605;GO:0009987;GO:0009991;GO:0010033;GO:0014070;GO:0016043;GO:0016053;GO:0018904;GO:0019432;GO:0019752;GO:0022607;GO:0031667;GO:0032386;GO:0032388;GO:0032501;GO:0032502;GO:0032787;GO:0032879;GO:0032880;GO:…	GO:0000166;GO:0003824;GO:0004467;GO:0005488;GO:0005515;GO:0005524;GO:0015645;GO:0016874;GO:0016877;GO:0017076;GO:0019899;GO:0019900;GO:0019901;GO:0019904;GO:0030554;GO:0032553;GO:0032555;GO:0032559;GO:0035639	GO:0005741;GO:0005778;GO:0005783;GO:0005789;GO:0005794;GO:0005811;GO:0016020;GO:0016021;GO:0019867;GO:0031090;GO:0031224;GO:0031903;GO:0031966;GO:0031968;GO:0042579;GO:0043226;GO:0043227;GO:0043229;GO:0043231;GO:0044422;GO:0044424;GO:0044425;GO:0044429;GO:0044432;GO:0044438;GO:0044439;GO:0044444;GO:0044446;GO:0044464;GO:0048471	REACT_380		13	12	12	29.6	27.1	27.1	80.419	0	29.426	295750000	36	24.155	24.7714	23.8465	24.6662	23.1248	21.4051	26.0316	25.7317	25.5401	22.2017	22.6287	23.3084
	2.96298	3.90966		2.2628	3.36983	ACSL4_HUMAN	ACSL4_HUMANLong-chain-fatty-acid--CoAligase4	O60488	ACSL4_HUMAN Long-chain-fatty-acid--CoA ligase 4	ACSL4	ACSL4	COG1022	6.2.1.3	acyl-CoA biosynthetic process;acyl-CoA metabolic process;acylglycerol biosynthetic process;acylglycerol metabolic process;anatomical structure development;biological regulation;biosynthetic process;carboxylic acid metabolic process;carboxylic acid transport;cellular biosynthetic process;cellular ketone metabolic process;cellular lipid metabolic process;cellular metabolic process;cellular process;…	acid-thiol ligase activity;adenyl nucleotide binding;adenyl ribonucleotide binding;arachidonate-CoA ligase activity;ATP binding;binding;catalytic activity;fatty acid ligase activity;ligase activity;ligase activity, forming carbon-sulfur bonds;long-chain fatty acid-CoA ligase activity;nucleotide binding;purine nucleotide binding;purine ribonucleoside triphosphate binding;purine ribonucleotide bind…	cell body;cell part;cytoplasm;cytoplasmic part;endoplasmic reticulum membrane;endoplasmic reticulum part;ER-mitochondrion membrane contact site;extracellular membrane-bounded organelle;extracellular organelle;extracellular region part;extracellular vesicular exosome;integral to membrane;intracellular membrane-bounded organelle;intracellular organelle;intracellular organelle part;intracellular par…	Adipocytokine signaling pathway;Fatty acid metabolism;Peroxisome;PPAR signaling pathway	AACTGGA,MIR-145;AACTTT_UNKNOWN;ACACTAC,MIR-142-3P;ACEVEDO_NORMAL_TISSUE_ADJACENT_TO_LIVER_TUMOR_UP;AMUNDSON_GENOTOXIC_SIGNATURE;ATACTGT,MIR-144;ATTCTTT,MIR-186;BEHAVIOR;BENPORATH_NANOG_TARGETS;BRUINS_UVC_RESPONSE_LATE;CACTGCC,MIR-34A,MIR-34C,MIR-449;CAGCTG_V$AP4_Q5;CAGGTG_V$E12_Q6;CAMP_UP.V1_UP;CHESLER_BRAIN_HIGHEST_EXPRESSION;CHIANG_LIVER_CANCER_SUBCLASS_CTNNB1_DN;CHIANG_LIVER_CANCER_SUBCLASS_IN…	GO:0001558;GO:0001676;GO:0006082;GO:0006629;GO:0006631;GO:0006637;GO:0006638;GO:0006639;GO:0006641;GO:0006662;GO:0006732;GO:0006810;GO:0006869;GO:0007584;GO:0008152;GO:0008610;GO:0009058;GO:0009108;GO:0009605;GO:0009987;GO:0009991;GO:0010033;GO:0015718;GO:0015849;GO:0015908;GO:0018904;GO:0019432;GO:0019752;GO:0022414;GO:0030307;GO:0031667;GO:0032303;GO:0032304;GO:0032306;GO:0032307;GO:0032368;GO:…	GO:0000166;GO:0003824;GO:0004467;GO:0005488;GO:0005524;GO:0015645;GO:0016874;GO:0016877;GO:0016878;GO:0017076;GO:0030554;GO:0031957;GO:0032553;GO:0032555;GO:0032559;GO:0035639;GO:0047676	GO:0005737;GO:0005741;GO:0005778;GO:0005789;GO:0005811;GO:0016020;GO:0016021;GO:0019867;GO:0031090;GO:0031224;GO:0031903;GO:0031966;GO:0031968;GO:0031982;GO:0031988;GO:0042579;GO:0043025;GO:0043226;GO:0043227;GO:0043229;GO:0043230;GO:0043231;GO:0044232;GO:0044233;GO:0044297;GO:0044421;GO:0044422;GO:0044424;GO:0044425;GO:0044429;GO:0044432;GO:0044438;GO:0044439;GO:0044444;GO:0044446;GO:0044455;GO:…	REACT_380		14	14	13	33.8	33.8	31.2	79.187	0	26.38	667020000	63	22.7848	23.1033	24.1888	22.5242	22.2266	20.8749	27.5032	26.8991	27.4036	25.5998	24.5437	25.5917
	0.346895	0.724718		1.68589	3.75332	ACSL5_HUMAN	ACSL5_HUMANLong-chain-fatty-acid--CoAligase5	Q9ULC5	ACSL5_HUMAN Long-chain-fatty-acid--CoA ligase 5	ACSL5	ACSL5	COG1022	6.2.1.3	acyl-CoA biosynthetic process;acyl-CoA metabolic process;acylglycerol biosynthetic process;acylglycerol metabolic process;biosynthetic process;carboxylic acid metabolic process;cellular biosynthetic process;cellular ketone metabolic process;cellular lipid metabolic process;cellular metabolic process;cellular process;coenzyme biosynthetic process;coenzyme metabolic process;cofactor biosynthetic pr…	adenyl nucleotide binding;adenyl ribonucleotide binding;ATP binding;binding;catalytic activity;fatty acid ligase activity;ligase activity;ligase activity, forming carbon-sulfur bonds;long-chain fatty acid-CoA ligase activity;nucleotide binding;purine nucleotide binding;purine ribonucleoside triphosphate binding;purine ribonucleotide binding;ribonucleotide binding	cell part;cytoplasmic part;endoplasmic reticulum;endoplasmic reticulum membrane;endoplasmic reticulum part;integral to membrane;intracellular membrane-bounded organelle;intracellular non-membrane-bounded organelle;intracellular organelle;intracellular organelle part;intracellular part;intrinsic to membrane;membrane;membrane part;membrane-bounded organelle;mitochondrial inner membrane;mitochondria…	Adipocytokine signaling pathway;Fatty acid metabolism;Peroxisome;PPAR signaling pathway	BERENJENO_TRANSFORMED_BY_RHOA_UP;BERTUCCI_MEDULLARY_VS_DUCTAL_BREAST_CANCER_UP;BOQUEST_STEM_CELL_CULTURED_VS_FRESH_UP;BOYAULT_LIVER_CANCER_SUBCLASS_G12_DN;BUYTAERT_PHOTODYNAMIC_THERAPY_STRESS_DN;CAGGTA_V$AREB6_01;CAIRO_HEPATOBLASTOMA_CLASSES_DN;CHIANG_LIVER_CANCER_SUBCLASS_CTNNB1_UP;chr10q25;COLINA_TARGETS_OF_4EBP1_AND_4EBP2;CTTTGA_V$LEF1_Q2;DIAZ_CHRONIC_MEYLOGENOUS_LEUKEMIA_UP;FULCHER_INFLAMMATO…	GO:0001676;GO:0006082;GO:0006629;GO:0006631;GO:0006637;GO:0006638;GO:0006639;GO:0006641;GO:0006662;GO:0006732;GO:0008152;GO:0008610;GO:0009058;GO:0009108;GO:0009987;GO:0018904;GO:0019432;GO:0019752;GO:0032787;GO:0035336;GO:0035337;GO:0035338;GO:0035383;GO:0035384;GO:0042180;GO:0043436;GO:0044237;GO:0044238;GO:0044249;GO:0044255;GO:0044281;GO:0045017;GO:0046460;GO:0046463;GO:0046486;GO:0046504;GO:…	GO:0000166;GO:0003824;GO:0004467;GO:0005488;GO:0005524;GO:0015645;GO:0016874;GO:0016877;GO:0017076;GO:0030554;GO:0032553;GO:0032555;GO:0032559;GO:0035639	GO:0005634;GO:0005730;GO:0005739;GO:0005741;GO:0005743;GO:0005783;GO:0005789;GO:0016020;GO:0016021;GO:0019866;GO:0019867;GO:0031090;GO:0031224;GO:0031966;GO:0031968;GO:0043226;GO:0043227;GO:0043228;GO:0043229;GO:0043231;GO:0043232;GO:0044422;GO:0044424;GO:0044425;GO:0044428;GO:0044429;GO:0044432;GO:0044444;GO:0044446;GO:0044464	REACT_380		8	8	8	19.2	19.2	19.2	75.99	0	12.348	180970000	28	23.2734	22.6261	24.0832	22.3202	18.9458	20.7372	25.516	22.9866	23.6543	24.664	23.8848	24.7142
	1.12491	-2.02537	+	1.01235	-16.4805	ACS2L_HUMAN	ACS2L_HUMANAcetyl-coenzymeAsynthetase2-like,mitochondrial	Q9NUB1	ACS2L_HUMAN Acetyl-coenzyme A synthetase 2-like, mitochondrial	ACSS1	ACSS1	COG0365	6.2.1.1	acetate biosynthetic process;acetate metabolic process;acetyl-CoA biosynthetic process;acetyl-CoA biosynthetic process from acetate;acetyl-CoA metabolic process;alcohol metabolic process;biosynthetic process;carboxylic acid biosynthetic process;carboxylic acid metabolic process;cellular biosynthetic process;cellular ketone metabolic process;cellular metabolic process;cellular process;coenzyme bio…	acetate-CoA ligase activity;acid-thiol ligase activity;adenyl nucleotide binding;adenyl ribonucleotide binding;AMP binding;ATP binding;binding;catalytic activity;CoA-ligase activity;ligase activity;ligase activity, forming carbon-sulfur bonds;nucleotide binding;purine nucleotide binding;purine ribonucleoside triphosphate binding;purine ribonucleotide binding;ribonucleotide binding	cell part;cytoplasmic part;intracellular organelle lumen;intracellular organelle part;intracellular part;membrane-enclosed lumen;mitochondrial matrix;mitochondrial part;organelle lumen;organelle part	Carbon fixation pathways in prokaryotes;Glycolysis / Gluconeogenesis;Methane metabolism;Propanoate metabolism;Pyruvate metabolism	BENPORATH_SUZ12_TARGETS;BHAT_ESR1_TARGETS_NOT_VIA_AKT1_UP;CHEN_METABOLIC_SYNDROM_NETWORK;chr20p11;COATES_MACROPHAGE_M1_VS_M2_UP;CRX_DN.V1_DN;ESC_J1_UP_EARLY.V1_UP;ESC_V6.5_UP_EARLY.V1_UP;FOSTER_KDM1A_TARGETS_UP;GCNP_SHH_UP_EARLY.V1_DN;GGGCGGR_V$SP1_Q6;GSE10094_LCMV_VS_LISTERIA_IND_EFF_CD4_TCELL_UP;GSE10239_NAIVE_VS_DAY4.5_EFF_CD8_TCELL_UP;GSE11864_UNTREATED_VS_CSF1_IFNG_PAM3CYS_IN_MAC_UP;GSE11864…	GO:0006066;GO:0006067;GO:0006069;GO:0006082;GO:0006083;GO:0006084;GO:0006085;GO:0006732;GO:0006805;GO:0008152;GO:0009058;GO:0009108;GO:0009987;GO:0016053;GO:0019413;GO:0019427;GO:0019541;GO:0019542;GO:0019752;GO:0032787;GO:0034308;GO:0042180;GO:0043436;GO:0044237;GO:0044249;GO:0044281;GO:0044283;GO:0046394;GO:0051186;GO:0051188;GO:0055114	GO:0000166;GO:0003824;GO:0003987;GO:0005488;GO:0005524;GO:0016208;GO:0016405;GO:0016874;GO:0016877;GO:0016878;GO:0017076;GO:0030554;GO:0032553;GO:0032555;GO:0032559;GO:0035639	GO:0005759;GO:0031974;GO:0043233;GO:0044422;GO:0044424;GO:0044429;GO:0044444;GO:0044446;GO:0044464;GO:0070013	REACT_34		11	11	11	22.8	22.8	22.8	74.856	0	39.601	211210000	35	24.8907	25.212	24.6272	25.7491	23.7744	22.6818	24.1454	23.1885	21.3199	0.001	22.7619	0.001
	2.46615	1.14271		2.09875	1.36438	ACTB_HUMAN;ACTBM_HUMAN	ACTB_HUMANActin,cytoplasmic1	P60709	ACTB_HUMAN Actin, cytoplasmic 1	ACTB	ACTB	COG5277		adherens junction organization;anatomical structure development;anatomical structure homeostasis;ATP-dependent chromatin remodeling;axon guidance;biological adhesion;biological regulation;blood coagulation;cell adhesion;cell junction assembly;cell junction organization;cell surface receptor linked signaling pathway;cell-cell adhesion;cell-cell junction organization;cellular component assembly;cel…	adenyl nucleotide binding;adenyl ribonucleotide binding;ATP binding;binding;cytoskeletal protein binding;enzyme binding;identical protein binding;kinesin binding;nitric-oxide synthase binding;nucleotide binding;protein binding;purine nucleotide binding;purine ribonucleoside triphosphate binding;purine ribonucleotide binding;ribonucleotide binding;structural constituent of cytoskeleton;structural …	adherens junction;anchoring junction;axon;blood microparticle;cell cortex part;cell junction;cell part;cell projection;cell-substrate adherens junction;cell-substrate junction;chromatin;chromosomal part;cortical cytoskeleton;cytoplasm;cytoplasmic part;cytoskeletal part;cytoskeleton;cytosol;extracellular membrane-bounded organelle;extracellular organelle;extracellular region part;extracellular spa…	Adherens junction;Arrhythmogenic right ventricular cardiomyopathy (ARVC);Bacterial invasion of epithelial cells;Dilated cardiomyopathy;Focal adhesion;Hypertrophic cardiomyopathy (HCM);Leukocyte transendothelial migration;Pathogenic Escherichia coli infection;Phagosome;Phototransduction - fly;Regulation of actin cytoskeleton;Shigellosis;Tight junction;Vibrio cholerae infection;Viral myocarditis	AAANWWTGC_UNKNOWN;AACTGGA,MIR-145;AACTTT_UNKNOWN;ATGAAGG,MIR-205;BASSO_HAIRY_CELL_LEUKEMIA_DN;BENPORATH_MYC_TARGETS_WITH_EBOX;BERENJENO_TRANSFORMED_BY_RHOA_DN;BROWNE_HCMV_INFECTION_14HR_DN;BROWNE_HCMV_INFECTION_24HR_DN;BROWNE_HCMV_INFECTION_6HR_UP;BRUINS_UVC_RESPONSE_LATE;CAGCTG_V$AP4_Q5;CASORELLI_ACUTE_PROMYELOCYTIC_LEUKEMIA_DN;CAVARD_LIVER_CANCER_MALIGNANT_VS_BENIGN;CCAWWNAAGG_V$SRF_Q4;CHEN_LUN…	GO:0001894;GO:0001895;GO:0002376;GO:0006325;GO:0006338;GO:0006457;GO:0006458;GO:0006928;GO:0006935;GO:0006950;GO:0006952;GO:0006955;GO:0006996;GO:0007155;GO:0007165;GO:0007166;GO:0007167;GO:0007169;GO:0007264;GO:0007411;GO:0007596;GO:0007599;GO:0008152;GO:0009605;GO:0009987;GO:0010033;GO:0016043;GO:0016337;GO:0016568;GO:0019538;GO:0021762;GO:0022607;GO:0022610;GO:0032501;GO:0032502;GO:0034109;GO:…	GO:0000166;GO:0005198;GO:0005200;GO:0005488;GO:0005515;GO:0005524;GO:0008092;GO:0008134;GO:0017076;GO:0019894;GO:0019899;GO:0030554;GO:0030957;GO:0032553;GO:0032555;GO:0032559;GO:0035639;GO:0042802;GO:0050998	GO:0000123;GO:0000785;GO:0000790;GO:0005615;GO:0005654;GO:0005737;GO:0005829;GO:0005856;GO:0005886;GO:0005912;GO:0005924;GO:0005925;GO:0014069;GO:0016020;GO:0030054;GO:0030055;GO:0030424;GO:0030529;GO:0030863;GO:0031982;GO:0031988;GO:0032991;GO:0034708;GO:0035097;GO:0035267;GO:0042995;GO:0043005;GO:0043189;GO:0043226;GO:0043227;GO:0043228;GO:0043229;GO:0043230;GO:0043232;GO:0043234;GO:0044421;GO:…	REACT_11035;REACT_11049;REACT_147867;REACT_160086;REACT_16936;REACT_17050;REACT_19195;REACT_20649;REACT_22266;REACT_22365;REACT_24970;REACT_263952;REACT_264198;REACT_264245;REACT_264464;REACT_355252;REACT_355372;REACT_355469	SM00268	41	41	3	98.1	98.1	7.5	41.736	0	323.31	3148700000000	16342	37.6575	37.6819	37.5784	36.8352	36.4186	36.2541	39.0684	38.4462	38.8314	37.7647	37.5524	38.2839
	0.825512	-1.4297		0.0727996	2.3717	ACTBL_HUMAN	ACTBL_HUMANBeta-actin-likeprotein2	Q562R1	ACTBL_HUMAN Beta-actin-like protein 2	ACTBL2	ACTBL2	COG5277			adenyl nucleotide binding;adenyl ribonucleotide binding;ATP binding;binding;nucleotide binding;purine nucleotide binding;purine ribonucleoside triphosphate binding;purine ribonucleotide binding;ribonucleotide binding	cell part;cytoplasm;cytoskeleton;extracellular membrane-bounded organelle;extracellular organelle;extracellular region part;extracellular space;extracellular vesicular exosome;intracellular non-membrane-bounded organelle;intracellular organelle;intracellular part;membrane-bounded organelle;membrane-bounded vesicle;non-membrane-bounded organelle;organelle;vesicle		CHEN_METABOLIC_SYNDROM_NETWORK;chr5q11;MARSON_BOUND_BY_FOXP3_STIMULATED;RAO_BOUND_BY_SALL4_ISOFORM_B;VANDESLUIS_NORMAL_EMBRYOS_UP;ZWANG_CLASS_1_TRANSIENTLY_INDUCED_BY_EGF		GO:0000166;GO:0005488;GO:0005524;GO:0017076;GO:0030554;GO:0032553;GO:0032555;GO:0032559;GO:0035639	GO:0005615;GO:0005737;GO:0005856;GO:0031982;GO:0031988;GO:0043226;GO:0043227;GO:0043228;GO:0043229;GO:0043230;GO:0043232;GO:0044421;GO:0044424;GO:0044464;GO:0065010;GO:0070062		SM00268	15	6	6	51.9	29.3	29.3	42.003	0	12.4	4954500000	38	30.1769	30.9129	28.3256	23.9537	0.001	20.2423	28.7822	27.9951	28.349	0.001	23.2281	28.0829
	1.00708	-0.284921		0.585016	-0.660932	ACTC_HUMAN;ACTA_HUMAN	ACTC_HUMANActin,alphacardiacmuscle1;ACTH_HUMANActin,gamma-entericsmoothmuscle;ACTA_HUMANActin,aorticsmoothmuscle	P68032;P63267;P62736	ACTC_HUMAN Actin, alpha cardiac muscle 1;ACTH_HUMAN Actin, gamma-enteric smooth muscle;ACTA_HUMAN Actin, aortic smooth muscle	ACTC1;ACTG2;ACTA2	ACTA2;ACTC1;ACTG2	COG5277		actin cytoskeleton organization;actin filament organization;actin filament-based movement;actin filament-based process;actin-mediated cell contraction;actin-myosin filament sliding;actomyosin structure organization;anatomical structure development;anatomical structure formation involved in morphogenesis;anatomical structure morphogenesis;apoptosis;biological regulation;cardiac muscle contraction;…	adenyl nucleotide binding;adenyl ribonucleotide binding;ATP binding;ATPase activity;binding;catalytic activity;cytoskeletal protein binding;enzyme binding;hydrolase activity;hydrolase activity, acting on acid anhydrides;hydrolase activity, acting on acid anhydrides, in phosphorus-containing anhydrides;kinase binding;myosin binding;nucleoside-triphosphatase activity;nucleotide binding;protein bind…	actin cytoskeleton;actin filament;actomyosin, actin part;adherens junction;anchoring junction;blood microparticle;cell junction;cell part;cell periphery;cell-substrate adherens junction;cell-substrate junction;contractile fiber;contractile fiber part;cytoplasm;cytoplasmic part;cytoskeletal part;cytoskeleton;cytosol;extracellular membrane-bounded organelle;extracellular organelle;extracellular reg…	Cardiac muscle contraction;Dilated cardiomyopathy;Hypertrophic cardiomyopathy (HCM);Vascular smooth muscle contraction	ABDULRAHMAN_KIDNEY_CANCER_VHL_DN;ACEVEDO_FGFR1_TARGETS_IN_PROSTATE_CANCER_MODEL_DN;ACTIN_CYTOSKELETON;ACTIN_FILAMENT;AFFAR_YY1_TARGETS_UP;AMIT_EGF_RESPONSE_480_HELA;ANASTASSIOU_CANCER_MESENCHYMAL_TRANSITION_SIGNATURE;APRELIKOVA_BRCA1_TARGETS;BANDRES_RESPONSE_TO_CARMUSTIN_MGMT_48HR_DN;BANDRES_RESPONSE_TO_CARMUSTIN_WITHOUT_MGMT_48HR_DN;BENPORATH_ES_1;BERENJENO_ROCK_SIGNALING_NOT_VIA_RHOA_DN;BERENJE…	GO:0003008;GO:0003012;GO:0003013;GO:0003015;GO:0003018;GO:0006915;GO:0006928;GO:0006936;GO:0006939;GO:0006941;GO:0006996;GO:0007010;GO:0007015;GO:0008152;GO:0008217;GO:0008219;GO:0009607;GO:0009615;GO:0009653;GO:0009987;GO:0010033;GO:0010927;GO:0010941;GO:0012501;GO:0014829;GO:0016043;GO:0016265;GO:0022607;GO:0030029;GO:0030036;GO:0030048;GO:0030049;GO:0030239;GO:0030240;GO:0031032;GO:0032501;GO:…	GO:0000166;GO:0003824;GO:0005488;GO:0005515;GO:0005524;GO:0008092;GO:0016462;GO:0016787;GO:0016817;GO:0016818;GO:0016887;GO:0017022;GO:0017076;GO:0017111;GO:0019899;GO:0019900;GO:0019901;GO:0030554;GO:0032553;GO:0032555;GO:0032559;GO:0035639	GO:0005615;GO:0005737;GO:0005829;GO:0005856;GO:0005884;GO:0005912;GO:0005924;GO:0005925;GO:0015629;GO:0016020;GO:0030017;GO:0030054;GO:0030055;GO:0030485;GO:0031674;GO:0031982;GO:0031988;GO:0032991;GO:0042643;GO:0043226;GO:0043227;GO:0043228;GO:0043229;GO:0043230;GO:0043232;GO:0043234;GO:0043292;GO:0044421;GO:0044422;GO:0044424;GO:0044430;GO:0044444;GO:0044446;GO:0044449;GO:0044464;GO:0065010;GO:…	REACT_16969;REACT_20558	SM00268	27	7	1	61	25.7	5.6	42.019	0	323.31	214230000000	1313	34.9378	34.8701	34.8415	33.7959	32.2902	32.4027	34.8575	34.4673	34.4699	32.427	31.9454	32.1335
	0.0925874	0.161079		2.32623	3.39347	ACTG_HUMAN	ACTG_HUMANActin,cytoplasmic2	P63261	ACTG_HUMAN Actin, cytoplasmic 2	ACTG1	ACTG1			actin cytoskeleton organization;actin filament-based process;actomyosin structure organization;adherens junction organization;anatomical structure homeostasis;axon guidance;biological adhesion;biological regulation;cell adhesion;cell junction assembly;cell junction organization;cell surface receptor linked signaling pathway;cell-cell adhesion;cell-cell junction organization;cellular component ass…	adenyl nucleotide binding;adenyl ribonucleotide binding;ATP binding;binding;enzyme binding;identical protein binding;nucleotide binding;protein binding;purine nucleotide binding;purine ribonucleoside triphosphate binding;purine ribonucleotide binding;ribonucleotide binding;structural constituent of cytoskeleton;structural molecule activity;ubiquitin protein ligase binding	blood microparticle;cell part;contractile fiber;cytoplasmic part;cytoskeletal part;cytoskeleton;cytosol;extracellular membrane-bounded organelle;extracellular organelle;extracellular region part;extracellular space;extracellular vesicular exosome;filamentous actin;intracellular membrane-bounded organelle;intracellular non-membrane-bounded organelle;intracellular organelle;intracellular organelle …	Adherens junction;Arrhythmogenic right ventricular cardiomyopathy (ARVC);Bacterial invasion of epithelial cells;Dilated cardiomyopathy;Focal adhesion;Hypertrophic cardiomyopathy (HCM);Leukocyte transendothelial migration;Pathogenic Escherichia coli infection;Phagosome;Phototransduction - fly;Regulation of actin cytoskeleton;Shigellosis;Tight junction;Vibrio cholerae infection;Viral myocarditis	AACTGGA,MIR-145;ACEVEDO_NORMAL_TISSUE_ADJACENT_TO_LIVER_TUMOR_DN;BAELDE_DIABETIC_NEPHROPATHY_DN;BENPORATH_MYC_TARGETS_WITH_EBOX;BILANGES_RAPAMYCIN_SENSITIVE_VIA_TSC1_AND_TSC2;BIOCARTA_HIVNEF_PATHWAY;BROWNE_HCMV_INFECTION_48HR_DN;BRUINS_UVC_RESPONSE_LATE;CAGCACT,MIR-512-3P;CHARAFE_BREAST_CANCER_LUMINAL_VS_MESENCHYMAL_DN;CHEN_LUNG_CANCER_SURVIVAL;CHEN_METABOLIC_SYNDROM_NETWORK;chr17q25;CTACTGT,MIR-…	GO:0001894;GO:0001895;GO:0002376;GO:0006928;GO:0006935;GO:0006950;GO:0006952;GO:0006955;GO:0006996;GO:0007010;GO:0007155;GO:0007165;GO:0007166;GO:0007167;GO:0007169;GO:0007264;GO:0007411;GO:0009605;GO:0009987;GO:0010033;GO:0016043;GO:0016337;GO:0022607;GO:0022610;GO:0030029;GO:0030036;GO:0031032;GO:0034109;GO:0034329;GO:0034330;GO:0034332;GO:0035556;GO:0035924;GO:0040011;GO:0042221;GO:0042330;GO:…	GO:0000166;GO:0005198;GO:0005200;GO:0005488;GO:0005515;GO:0005524;GO:0017076;GO:0019899;GO:0030554;GO:0031625;GO:0032553;GO:0032555;GO:0032559;GO:0035639;GO:0042802	GO:0005615;GO:0005634;GO:0005829;GO:0005856;GO:0005886;GO:0016020;GO:0030016;GO:0031941;GO:0031982;GO:0031988;GO:0032991;GO:0043226;GO:0043227;GO:0043228;GO:0043229;GO:0043230;GO:0043231;GO:0043232;GO:0043234;GO:0043292;GO:0044421;GO:0044422;GO:0044424;GO:0044430;GO:0044444;GO:0044446;GO:0044464;GO:0065010;GO:0070062;GO:0072562	REACT_11035;REACT_11049;REACT_147867;REACT_160086;REACT_19195;REACT_20649;REACT_22266;REACT_22365;REACT_263952;REACT_264198;REACT_264464;REACT_355252;REACT_355372;REACT_355469	SM00268	40	2	2	98.1	4.8	4.8	41.792	0	143.35	1825100000	130	25.84	25.0846	25.0552	25.7655	26.0352	24.2658	25.775	24.3978	26.2903	29.09	28.3105	28.8464
	4.6193	2.06984		1.09499	1.20777	ACL6A_HUMAN;ACL6B_HUMAN	ACL6A_HUMANActin-likeprotein6A	O96019	ACL6A_HUMAN Actin-like protein 6A	ACTL6A	ACTL6A	COG5277		anatomical structure development;ATP-dependent chromatin remodeling;biological regulation;biosynthetic process;cellular biosynthetic process;cellular component organization;cellular component organization at cellular level;cellular component organization or biogenesis;cellular component organization or biogenesis at cellular level;cellular macromolecule biosynthetic process;cellular macromolecule…	binding;chromatin binding;protein binding transcription factor activity;transcription coactivator activity;transcription cofactor activity;transcription factor binding transcription factor activity	cell part;chromatin;chromatin remodeling complex;chromosomal part;DNA helicase complex;H4/H2A histone acetyltransferase complex;histone acetyltransferase complex;Ino80 complex;intracellular membrane-bounded organelle;intracellular organelle;intracellular organelle part;intracellular part;macromolecular complex;membrane;membrane-bounded organelle;npBAF complex;NuA4 histone acetyltransferase comple…		ACEVEDO_LIVER_CANCER_UP;ACEVEDO_LIVER_TUMOR_VS_NORMAL_ADJACENT_TISSUE_UP;ACTGCCT,MIR-34B;BERENJENO_TRANSFORMED_BY_RHOA_UP;BLALOCK_ALZHEIMERS_DISEASE_UP;BORCZUK_MALIGNANT_MESOTHELIOMA_UP;BOYAULT_LIVER_CANCER_SUBCLASS_G3_UP;CHANG_CORE_SERUM_RESPONSE_UP;chr3q26;CHROMATIN_BINDING;CHROMATIN_MODIFICATION;CHROMATIN_REMODELING;CHROMOSOME_ORGANIZATION_AND_BIOGENESIS;CSR_LATE_UP.V1_UP;CTTTGT_V$LEF1_Q2;DIAZ…	GO:0003407;GO:0006139;GO:0006259;GO:0006281;GO:0006310;GO:0006325;GO:0006338;GO:0006351;GO:0006355;GO:0006357;GO:0006464;GO:0006473;GO:0006475;GO:0006807;GO:0006950;GO:0006974;GO:0006996;GO:0007165;GO:0007399;GO:0008152;GO:0009058;GO:0009059;GO:0009889;GO:0009987;GO:0010468;GO:0010556;GO:0016043;GO:0016070;GO:0016568;GO:0016569;GO:0016570;GO:0016573;GO:0018193;GO:0018205;GO:0018393;GO:0018394;GO:…	GO:0000988;GO:0000989;GO:0003682;GO:0003712;GO:0003713;GO:0005488	GO:0000123;GO:0000785;GO:0000790;GO:0005634;GO:0005654;GO:0005886;GO:0016020;GO:0016514;GO:0016585;GO:0031011;GO:0032991;GO:0033202;GO:0035267;GO:0043189;GO:0043226;GO:0043227;GO:0043229;GO:0043231;GO:0043234;GO:0044422;GO:0044424;GO:0044427;GO:0044428;GO:0044446;GO:0044451;GO:0044454;GO:0044464;GO:0070603;GO:0071564	REACT_264245;REACT_264545	SM00268	15	15	15	45.5	45.5	45.5	47.46	0	282.87	6287000000	238	28.2888	28.1566	28.3359	27.7815	26.4423	26.31	30.4806	30.2375	30.2728	28.4445	28.0263	27.6864
	1.82874	0.311666		0.0137473	-0.0147368	ACTN1_HUMAN;ACTN2_HUMAN	ACTN1_HUMANAlpha-actinin-1	P12814	ACTN1_HUMAN Alpha-actinin-1	ACTN1	ACTN1	COG5069		actin crosslink formation;actin cytoskeleton organization;actin filament bundle assembly;actin filament organization;actin filament-based process;biological regulation;blood coagulation;cell activation;cell junction assembly;cell junction organization;cell-substrate junction assembly;cellular component assembly;cellular component assembly at cellular level;cellular component organization;cellular…	binding;calcium ion binding;cation binding;cytoskeletal protein binding;double-stranded RNA binding;integrin binding;ion binding;ion channel binding;ligand-dependent nuclear receptor transcription coactivator activity;metal ion binding;nucleic acid binding;protein binding;protein binding transcription factor activity;protein complex binding;receptor binding;RNA binding;transcription coactivator a…	actin filament bundle;actomyosin;adherens junction;anchoring junction;cell cortex part;cell junction;cell part;cell projection;cell projection part;cell-cell adherens junction;cell-cell junction;cell-substrate adherens junction;cell-substrate junction;contractile fiber part;cortical actin cytoskeleton;cortical cytoskeleton;cytoplasm;cytoplasmic membrane-bounded vesicle lumen;cytoplasmic part;cyto…	Adherens junction;Amoebiasis;Arrhythmogenic right ventricular cardiomyopathy (ARVC);Focal adhesion;Leukocyte transendothelial migration;Regulation of actin cytoskeleton;Systemic lupus erythematosus;Tight junction	AAGCACA,MIR-218;ADHERENS_JUNCTION;AMIT_EGF_RESPONSE_480_HELA;ATAGGAA,MIR-202;BANDRES_RESPONSE_TO_CARMUSTIN_MGMT_24HR_DN;BANDRES_RESPONSE_TO_CARMUSTIN_MGMT_48HR_DN;BANDRES_RESPONSE_TO_CARMUSTIN_WITHOUT_MGMT_24HR_DN;BANDRES_RESPONSE_TO_CARMUSTIN_WITHOUT_MGMT_48HR_DN;BASOLATERAL_PLASMA_MEMBRANE;BERENJENO_TRANSFORMED_BY_RHOA_UP;BERTUCCI_MEDULLARY_VS_DUCTAL_BREAST_CANCER_DN;BIDUS_METASTASIS_DN;BIOCART…	GO:0001775;GO:0002576;GO:0006810;GO:0006887;GO:0006996;GO:0007010;GO:0007015;GO:0007044;GO:0007596;GO:0007599;GO:0009987;GO:0010941;GO:0016043;GO:0016192;GO:0022607;GO:0030029;GO:0030036;GO:0030168;GO:0030198;GO:0032501;GO:0032879;GO:0032940;GO:0034329;GO:0034330;GO:0042981;GO:0043062;GO:0043067;GO:0046903;GO:0048041;GO:0048519;GO:0048523;GO:0050789;GO:0050794;GO:0050817;GO:0050878;GO:0051017;GO:…	GO:0000988;GO:0000989;GO:0003676;GO:0003712;GO:0003713;GO:0003723;GO:0003725;GO:0005102;GO:0005178;GO:0005488;GO:0005509;GO:0005515;GO:0008092;GO:0017166;GO:0030374;GO:0032403;GO:0043167;GO:0043169;GO:0044325;GO:0046872	GO:0001725;GO:0001726;GO:0005576;GO:0005615;GO:0005634;GO:0005737;GO:0005829;GO:0005856;GO:0005886;GO:0005911;GO:0005912;GO:0005913;GO:0005916;GO:0005924;GO:0005925;GO:0016020;GO:0030018;GO:0030054;GO:0030055;GO:0030863;GO:0030864;GO:0031093;GO:0031143;GO:0031974;GO:0031982;GO:0031983;GO:0031988;GO:0032432;GO:0034774;GO:0042641;GO:0042995;GO:0043005;GO:0043197;GO:0043226;GO:0043227;GO:0043228;GO:…	REACT_163942;REACT_20580;REACT_23832;REACT_318	SM00033;SM00054;SM00150	67	46	44	75.8	56.5	56.5	103.06	0	323.31	35477000000	1487	31.8631	31.941	31.7599	31.018	29.9777	30.5005	32.2718	32.1404	32.0868	30.7673	30.1268	30.5579
	0.854212	0.458204		1.85872	1.54757	ACTN4_HUMAN	ACTN4_HUMANAlpha-actinin-4	O43707	ACTN4_HUMAN Alpha-actinin-4	ACTN4	ACTN4	COG5069		actin cytoskeleton organization;actin filament bundle assembly;actin filament organization;actin filament-based process;biological regulation;blood coagulation;cell activation;cell junction assembly;cell junction organization;cell-cell junction assembly;cell-cell junction organization;cellular component assembly;cellular component assembly at cellular level;cellular component organization;cellula…	actin binding;actin filament binding;binding;calcium ion binding;cation binding;cytoskeletal protein binding;hormone receptor binding;identical protein binding;integrin binding;ion binding;ligand-dependent nuclear receptor transcription coactivator activity;metal ion binding;nuclear hormone receptor binding;nucleoside binding;protein binding;protein binding transcription factor activity;protein c…	actin filament bundle;actomyosin;adherens junction;anchoring junction;cell cortex part;cell junction;cell part;cell projection;cell-cell junction;cell-substrate adherens junction;cell-substrate junction;contractile fiber part;cortical cytoskeleton;cytoplasm;cytoplasmic membrane-bounded vesicle lumen;cytoplasmic part;cytoplasmic vesicle part;cytoskeletal part;cytoskeleton;extracellular membrane-bo…	Adherens junction;Amoebiasis;Arrhythmogenic right ventricular cardiomyopathy (ARVC);Focal adhesion;Leukocyte transendothelial migration;Regulation of actin cytoskeleton;Systemic lupus erythematosus;Tight junction	AAACCAC,MIR-140;ACTIN_BINDING;ACTIN_FILAMENT_BINDING;ACTTTAT,MIR-142-5P;AMIT_SERUM_RESPONSE_480_MCF10A;BCAT_BILD_ET_AL_UP;BERENJENO_TRANSFORMED_BY_RHOA_REVERSIBLY_DN;BERENJENO_TRANSFORMED_BY_RHOA_UP;CELL_PROJECTION;CHICAS_RB1_TARGETS_CONFLUENT;chr19q13;CTATGCA,MIR-153;CYTOPLASM;CYTOPLASMIC_PART;CYTOSKELETAL_PROTEIN_BINDING;DELACROIX_RAR_BOUND_ES;DELYS_THYROID_CANCER_UP;ENK_UV_RESPONSE_KERATINOCYT…	GO:0001666;GO:0001775;GO:0002028;GO:0002576;GO:0006810;GO:0006887;GO:0006950;GO:0006996;GO:0007010;GO:0007015;GO:0007043;GO:0007165;GO:0007596;GO:0007599;GO:0009987;GO:0010155;GO:0010941;GO:0010959;GO:0015031;GO:0016043;GO:0016192;GO:0022607;GO:0022898;GO:0030029;GO:0030036;GO:0030100;GO:0030168;GO:0030522;GO:0032409;GO:0032411;GO:0032412;GO:0032414;GO:0032415;GO:0032417;GO:0032501;GO:0032879;GO:…	GO:0000988;GO:0000989;GO:0001882;GO:0003712;GO:0003713;GO:0003779;GO:0005102;GO:0005178;GO:0005488;GO:0005509;GO:0005515;GO:0008092;GO:0008134;GO:0030374;GO:0032403;GO:0035257;GO:0042802;GO:0042803;GO:0042974;GO:0043167;GO:0043169;GO:0046872;GO:0046983;GO:0051015;GO:0051427	GO:0001725;GO:0005576;GO:0005615;GO:0005634;GO:0005737;GO:0005856;GO:0005911;GO:0005912;GO:0005924;GO:0005925;GO:0030018;GO:0030054;GO:0030055;GO:0030529;GO:0030863;GO:0031093;GO:0031143;GO:0031974;GO:0031982;GO:0031983;GO:0031988;GO:0032432;GO:0032991;GO:0034774;GO:0042641;GO:0042995;GO:0043005;GO:0043226;GO:0043227;GO:0043228;GO:0043229;GO:0043230;GO:0043231;GO:0043232;GO:0043233;GO:0043234;GO:…	REACT_23832;REACT_318	SM00033;SM00054;SM00150	68	68	46	76.1	76.1	53.2	104.85	0	323.31	58394000000	2366	32.3583	32.2787	32.3278	31.2877	30.1444	30.3625	33.1112	32.2941	32.9341	32.1954	31.9219	32.3201
	0.773083	-0.597516		1.65766	0.849387	ARP10_HUMAN	ARP10_HUMANActin-relatedprotein10	Q9NZ32	ARP10_HUMAN Actin-related protein 10	ACTR10	ACTR10	COG5277		cellular component movement;cellular process;microtubule-based movement;microtubule-based process		cell part;cytoplasm;cytoskeletal part;dynactin complex;intracellular organelle part;intracellular part;macromolecular complex;microtubule associated complex;organelle part;protein complex		AGUIRRE_PANCREATIC_CANCER_COPY_NUMBER_UP;BLALOCK_ALZHEIMERS_DISEASE_DN;chr14q22;CTTTGCA,MIR-527;GCM_BAG5;GCM_CSNK1D;GCM_HBP1;GCM_MLL;GCM_NF2;GCM_RAB10;GGATTA_V$PITX2_Q2;GSE12845_IGD_NEG_BLOOD_VS_DARKZONE_GC_TONSIL_BCELL_DN;GSE14308_TH17_VS_NAIVE_CD4_TCELL_UP;GSE14308_TH2_VS_NATURAL_TREG_DN;GSE1432_1H_VS_6H_IFNG_MICROGLIA_DN;GSE1432_6H_VS_24H_IFNG_MICROGLIA_UP;GSE1432_CTRL_VS_IFNG_6H_MICROGLIA_DN;…	GO:0006928;GO:0007017;GO:0007018;GO:0009987		GO:0005737;GO:0005869;GO:0005875;GO:0032991;GO:0043234;GO:0044422;GO:0044424;GO:0044430;GO:0044446;GO:0044464		SM00268	5	5	5	18.9	18.9	18.9	46.306	0	5.4979	93340000	16	23.1341	23.6862	23.5241	21.7897	21.9724	22.1229	23.0336	22.235	23.2832	22.3865	23.0453	23.0014
	2.31538	1.50698		1.34698	1.67525	ACTZ_HUMAN	ACTZ_HUMANAlpha-centractin	P61163	ACTZ_HUMAN Alpha-centractin	ACTR1A	ACTR1A	COG5277		antigen processing and presentation;antigen processing and presentation of exogenous antigen;antigen processing and presentation of exogenous peptide antigen;antigen processing and presentation of exogenous peptide antigen via MHC class II;antigen processing and presentation of peptide antigen;antigen processing and presentation of peptide antigen via MHC class II;antigen processing and presentat…	adenyl nucleotide binding;adenyl ribonucleotide binding;ATP binding;binding;nucleotide binding;purine nucleotide binding;purine ribonucleoside triphosphate binding;purine ribonucleotide binding;ribonucleotide binding	cell part;centrosome;cytoplasm;cytoplasmic part;cytoskeletal part;cytosol;dynactin complex;extracellular membrane-bounded organelle;extracellular organelle;extracellular region part;extracellular vesicular exosome;intracellular non-membrane-bounded organelle;intracellular organelle;intracellular organelle part;intracellular part;macromolecular complex;membrane-bounded organelle;membrane-bounded v…		ACCAAAG,MIR-9;ACTAYRNNNCCCR_UNKNOWN;ACTGCAG,MIR-17-3P;ACTGCCT,MIR-34B;ACTIN_CYTOSKELETON;ALFANO_MYC_TARGETS;ARGGGTTAA_UNKNOWN;BASAKI_YBX1_TARGETS_UP;BENPORATH_NANOG_TARGETS;BENPORATH_SOX2_TARGETS;BLALOCK_ALZHEIMERS_DISEASE_DN;BYSTRYKH_HEMATOPOIESIS_STEM_CELL_AND_BRAIN_QTL_TRANS;CACTGCC,MIR-34A,MIR-34C,MIR-449;CAFFAREL_RESPONSE_TO_THC_8HR_3_DN;chr10q24;COLDREN_GEFITINIB_RESISTANCE_UP;CTTTGA_V$LEF1…	GO:0000086;GO:0000278;GO:0002376;GO:0002478;GO:0002495;GO:0002504;GO:0006810;GO:0006996;GO:0007049;GO:0009987;GO:0016043;GO:0016192;GO:0019882;GO:0019884;GO:0019886;GO:0022402;GO:0048002;GO:0051234;GO:0071840;GO:0071841;GO:0071842	GO:0000166;GO:0005488;GO:0005524;GO:0017076;GO:0030554;GO:0032553;GO:0032555;GO:0032559;GO:0035639	GO:0005737;GO:0005813;GO:0005815;GO:0005829;GO:0005869;GO:0005875;GO:0031982;GO:0031988;GO:0032991;GO:0043226;GO:0043227;GO:0043228;GO:0043229;GO:0043230;GO:0043232;GO:0043234;GO:0044421;GO:0044422;GO:0044424;GO:0044430;GO:0044444;GO:0044446;GO:0044464;GO:0065010;GO:0070062	REACT_121399;REACT_15296;REACT_15364;REACT_15451;REACT_160315;REACT_267965	SM00268	17	10	10	46.3	28.5	28.5	42.613	0	87.811	2853500000	157	27.4715	26.8459	27.7134	27.0784	25.3468	25.492	28.752	28.8236	28.9761	27.7312	27.3115	27.9004
	3.03654	1.97768		0.31674	0.227116	ACTY_HUMAN	ACTY_HUMANBeta-centractin	P42025	ACTY_HUMAN Beta-centractin	ACTR1B	ACTR1B	COG5277		antigen processing and presentation;antigen processing and presentation of exogenous antigen;antigen processing and presentation of exogenous peptide antigen;antigen processing and presentation of exogenous peptide antigen via MHC class II;antigen processing and presentation of peptide antigen;antigen processing and presentation of peptide antigen via MHC class II;antigen processing and presentat…	adenyl nucleotide binding;adenyl ribonucleotide binding;ATP binding;binding;nucleotide binding;purine nucleotide binding;purine ribonucleoside triphosphate binding;purine ribonucleotide binding;ribonucleotide binding	cell part;centrosome;cytoplasm;cytoplasmic part;cytoskeletal part;cytosol;dynactin complex;extracellular membrane-bounded organelle;extracellular organelle;extracellular region part;extracellular vesicular exosome;intracellular non-membrane-bounded organelle;intracellular organelle;intracellular organelle part;intracellular part;macromolecular complex;membrane;membrane-bounded organelle;membrane-…		ACTIN_CYTOSKELETON;BENPORATH_NANOG_TARGETS;BLALOCK_ALZHEIMERS_DISEASE_DN;BLALOCK_ALZHEIMERS_DISEASE_INCIPIENT_DN;BROWNE_HCMV_INFECTION_48HR_DN;CCTNTMAGA_UNKNOWN;chr2q11;CTGCAGY_UNKNOWN;CTTTAAR_UNKNOWN;CYTOSKELETAL_PART;CYTOSKELETON;GATTGGY_V$NFY_Q6_01;GEORGES_TARGETS_OF_MIR192_AND_MIR215;GRAESSMANN_APOPTOSIS_BY_DOXORUBICIN_UP;GSE15930_NAIVE_VS_24H_IN_VITRO_STIM_CD8_TCELL_UP;GSE15930_NAIVE_VS_24H_…	GO:0002376;GO:0002478;GO:0002495;GO:0002504;GO:0019882;GO:0019884;GO:0019886;GO:0048002	GO:0000166;GO:0005488;GO:0005524;GO:0017076;GO:0030554;GO:0032553;GO:0032555;GO:0032559;GO:0035639	GO:0005737;GO:0005813;GO:0005815;GO:0005829;GO:0005869;GO:0005875;GO:0016020;GO:0031982;GO:0031988;GO:0032991;GO:0043226;GO:0043227;GO:0043228;GO:0043229;GO:0043230;GO:0043232;GO:0043234;GO:0044421;GO:0044422;GO:0044424;GO:0044430;GO:0044444;GO:0044446;GO:0044464;GO:0065010;GO:0070062	REACT_121399	SM00268	17	17	10	55.9	55.9	36.2	42.293	0	176.09	6190000000	246	28.1214	28.4432	28.5535	27.2815	26.9616	27.098	30.5989	29.9921	30.4602	27.8947	27.0132	27.1146
	1.11262	-0.284255		0.963969	0.464174	ARP2_HUMAN	ARP2_HUMANActin-relatedprotein2	P61160	ARP2_HUMAN Actin-related protein 2	ACTR2	ACTR2	COG5277		actin cytoskeleton organization;actin filament organization;actin filament-based process;actin nucleation;anatomical structure formation involved in morphogenesis;Arp2/3 complex-mediated actin nucleation;asymmetric cell division;axon guidance;biological regulation;cell cycle cytokinesis;cell cycle process;cell division;cell projection assembly;cell projection organization;cell surface receptor li…	adenyl nucleotide binding;adenyl ribonucleotide binding;ATP binding;binding;nucleotide binding;purine nucleotide binding;purine ribonucleoside triphosphate binding;purine ribonucleotide binding;ribonucleotide binding;structural constituent of cytoskeleton;structural molecule activity	actin cap;actin cytoskeleton;adherens junction;anchoring junction;Arp2/3 protein complex;cell cortex part;cell junction;cell part;cell projection;cell-substrate adherens junction;cell-substrate junction;cytoplasm;cytoplasmic part;cytoskeletal part;cytoskeleton;cytosol;extracellular membrane-bounded organelle;extracellular organelle;extracellular region part;extracellular vesicular exosome;focal a…		ACTIN_CYTOSKELETON;ATGCTGG,MIR-338;BIOCARTA_ACTINY_PATHWAY;BIOCARTA_CDC42RAC_PATHWAY;BIOCARTA_MPR_PATHWAY;BIOCARTA_RHO_PATHWAY;BIOCARTA_SALMONELLA_PATHWAY;BLALOCK_ALZHEIMERS_DISEASE_DN;CASORELLI_ACUTE_PROMYELOCYTIC_LEUKEMIA_DN;CHARAFE_BREAST_CANCER_LUMINAL_VS_MESENCHYMAL_DN;CHENG_RESPONSE_TO_NICKEL_ACETATE;chr2p;CYTOSKELETAL_PART;CYTOSKELETON;DIAZ_CHRONIC_MEYLOGENOUS_LEUKEMIA_UP;ENK_UV_RESPONSE_K…	GO:0000910;GO:0002376;GO:0006810;GO:0006928;GO:0006935;GO:0006950;GO:0006952;GO:0006955;GO:0006996;GO:0007010;GO:0007015;GO:0007017;GO:0007018;GO:0007163;GO:0007165;GO:0007166;GO:0007167;GO:0007169;GO:0007264;GO:0007411;GO:0008064;GO:0008356;GO:0009605;GO:0009987;GO:0010638;GO:0010927;GO:0016043;GO:0016344;GO:0016482;GO:0022402;GO:0022607;GO:0030029;GO:0030030;GO:0030031;GO:0030036;GO:0030832;GO:…	GO:0000166;GO:0005198;GO:0005200;GO:0005488;GO:0005524;GO:0017076;GO:0030554;GO:0032553;GO:0032555;GO:0032559;GO:0035639	GO:0005737;GO:0005829;GO:0005856;GO:0005885;GO:0005912;GO:0005924;GO:0005925;GO:0015629;GO:0016020;GO:0030054;GO:0030055;GO:0030478;GO:0031982;GO:0031988;GO:0032991;GO:0042995;GO:0043226;GO:0043227;GO:0043228;GO:0043229;GO:0043230;GO:0043232;GO:0043234;GO:0044421;GO:0044422;GO:0044424;GO:0044430;GO:0044444;GO:0044446;GO:0044448;GO:0044464;GO:0065010;GO:0070062;GO:0070161	REACT_160086;REACT_263952;REACT_355372	SM00268	22	22	22	53.8	53.8	53.8	44.76	0	323.31	23420000000	1024	31.4818	31.4844	31.6095	30.1472	29.6795	29.3992	31.4657	31.1185	31.1387	30.0927	30.2532	30.2726
	2.13906	1.03624		0.453527	0.402719	ARP3_HUMAN;ARP3C_HUMAN	ARP3_HUMANActin-relatedprotein3	P61158	ARP3_HUMAN Actin-related protein 3	ACTR3	ACTR3			actin cytoskeleton organization;actin filament organization;actin filament-based process;actin nucleation;anatomical structure morphogenesis;Arp2/3 complex-mediated actin nucleation;asymmetric cell division;axon guidance;biological regulation;cell cycle cytokinesis;cell cycle process;cell division;cell part morphogenesis;cell projection morphogenesis;cell projection organization;cell surface rece…	adenyl nucleotide binding;adenyl ribonucleotide binding;ATP binding;binding;nucleotide binding;purine nucleotide binding;purine ribonucleoside triphosphate binding;purine ribonucleotide binding;ribonucleotide binding;structural constituent of cytoskeleton;structural molecule activity	actin cytoskeleton;actin filament;adherens junction;anchoring junction;Arp2/3 protein complex;cell junction;cell part;cell projection;cell-cell junction;cell-substrate adherens junction;cell-substrate junction;cytoplasmic part;cytoskeletal part;cytoskeleton;cytosol;excitatory synapse;extracellular membrane-bounded organelle;extracellular organelle;extracellular region part;extracellular vesicular…		AACTGGA,MIR-145;AACTTT_UNKNOWN;ACATATC,MIR-190;ACEVEDO_LIVER_CANCER_UP;ACEVEDO_NORMAL_TISSUE_ADJACENT_TO_LIVER_TUMOR_UP;ACTIN_CYTOSKELETON;BAELDE_DIABETIC_NEPHROPATHY_DN;BENPORATH_MYC_MAX_TARGETS;BIOCARTA_ACTINY_PATHWAY;BIOCARTA_CDC42RAC_PATHWAY;BIOCARTA_MPR_PATHWAY;BIOCARTA_RHO_PATHWAY;BIOCARTA_SALMONELLA_PATHWAY;BLALOCK_ALZHEIMERS_DISEASE_DN;BRUECKNER_TARGETS_OF_MIRLET7A3_DN;CASORELLI_ACUTE_PRO…	GO:0000910;GO:0002376;GO:0006928;GO:0006935;GO:0006950;GO:0006952;GO:0006955;GO:0006996;GO:0007010;GO:0007015;GO:0007017;GO:0007018;GO:0007163;GO:0007165;GO:0007166;GO:0007167;GO:0007169;GO:0007264;GO:0007411;GO:0008064;GO:0008356;GO:0009605;GO:0009653;GO:0009743;GO:0009987;GO:0010033;GO:0010591;GO:0010592;GO:0010638;GO:0010720;GO:0010769;GO:0010975;GO:0016043;GO:0016344;GO:0022402;GO:0022603;GO:…	GO:0000166;GO:0005198;GO:0005200;GO:0005488;GO:0005524;GO:0017076;GO:0030554;GO:0032553;GO:0032555;GO:0032559;GO:0035639	GO:0000139;GO:0002102;GO:0005829;GO:0005856;GO:0005884;GO:0005885;GO:0005911;GO:0005912;GO:0005924;GO:0005925;GO:0015629;GO:0016020;GO:0030027;GO:0030054;GO:0030055;GO:0030056;GO:0031090;GO:0031982;GO:0031988;GO:0032991;GO:0042995;GO:0043226;GO:0043227;GO:0043228;GO:0043229;GO:0043230;GO:0043232;GO:0043234;GO:0044421;GO:0044422;GO:0044424;GO:0044430;GO:0044431;GO:0044444;GO:0044446;GO:0044464;GO:…	REACT_160086;REACT_263952;REACT_355372	SM00268	31	31	27	77	77	72.2	47.371	0	323.31	73345000000	1993	32.4311	32.4613	32.4844	32.0131	30.9631	30.8105	33.2514	33.9022	33.3319	31.7113	31.7364	31.5471
	0.884687	-14.3214		0.934149	-13.2163	ARP5_HUMAN	ARP5_HUMANActin-relatedprotein5	Q9H9F9	ARP5_HUMAN Actin-related protein 5	ACTR5	ACTR5	COG5277		biological regulation;biosynthetic process;cellular biosynthetic process;cellular macromolecule biosynthetic process;cellular macromolecule metabolic process;cellular metabolic process;cellular nitrogen compound metabolic process;cellular process;cellular response to stimulus;cellular response to stress;DNA metabolic process;DNA recombination;DNA repair;double-strand break repair;macromolecule bi…		cell part;chromatin remodeling complex;chromosomal part;cytoplasm;DNA helicase complex;Ino80 complex;intracellular membrane-bounded organelle;intracellular organelle;intracellular organelle part;intracellular part;macromolecular complex;membrane-bounded organelle;nuclear chromosome part;nuclear part;nucleus;organelle;organelle part;protein complex		BONOME_OVARIAN_CANCER_SURVIVAL_OPTIMAL_DEBULKING;chr20q12;GGGCGGR_V$SP1_Q6;GSE13306_TREG_RA_VS_TCONV_RA_DN;GSE13493_DP_VS_CD8POS_THYMOCYTE_UP;GSE17974_0.5H_VS_72H_UNTREATED_IN_VITRO_CD4_TCELL_UP;GSE22886_NAIVE_TCELL_VS_DC_UP;GSE26928_EFF_MEMORY_VS_CXCR5_POS_CD4_TCELL_UP;GSE29618_LAIV_VS_TIV_FLU_VACCINE_DAY7_MDC_UP;GSE29618_PRE_VS_DAY7_POST_TIV_FLU_VACCINE_BCELL_DN;GSE36476_CTRL_VS_TSST_ACT_40H_ME…	GO:0006139;GO:0006259;GO:0006281;GO:0006302;GO:0006310;GO:0006351;GO:0006355;GO:0006807;GO:0006950;GO:0006974;GO:0008152;GO:0009058;GO:0009059;GO:0009889;GO:0009987;GO:0010468;GO:0010556;GO:0016070;GO:0019219;GO:0019222;GO:0031323;GO:0031326;GO:0032774;GO:0033554;GO:0034641;GO:0034645;GO:0043170;GO:0044237;GO:0044238;GO:0044249;GO:0044260;GO:0050789;GO:0050794;GO:0050896;GO:0051171;GO:0051252;GO:…		GO:0005634;GO:0005737;GO:0016585;GO:0031011;GO:0032991;GO:0033202;GO:0043226;GO:0043227;GO:0043229;GO:0043231;GO:0043234;GO:0044422;GO:0044424;GO:0044427;GO:0044428;GO:0044446;GO:0044454;GO:0044464		SM00268	4	4	4	9.6	9.6	9.6	68.297	0.0008285	2.907	22491000	4	22.8065	20.0471	22.5836	20.3285	19.3223	0.001	22.4711	0.001	0.001	0.001	0.001	0.001
	0.266847	-5.46817		0	0	ARP8_HUMAN	ARP8_HUMANActin-relatedprotein8	Q9H981	ARP8_HUMAN Actin-related protein 8	ACTR8	ACTR8	COG5277		biological regulation;biosynthetic process;cell cycle phase;cell cycle process;cell division;cellular biosynthetic process;cellular component organization;cellular component organization at cellular level;cellular component organization or biogenesis;cellular component organization or biogenesis at cellular level;cellular macromolecule biosynthetic process;cellular macromolecule metabolic process…	adenyl nucleotide binding;adenyl ribonucleotide binding;ATP binding;binding;nucleotide binding;purine nucleotide binding;purine ribonucleoside triphosphate binding;purine ribonucleotide binding;ribonucleotide binding	cell part;chromatin remodeling complex;chromosomal part;DNA helicase complex;Ino80 complex;intracellular membrane-bounded organelle;intracellular organelle;intracellular organelle part;intracellular part;macromolecular complex;membrane-bounded organelle;nuclear chromosome part;nuclear part;nucleus;organelle;organelle part;protein complex		BLALOCK_ALZHEIMERS_DISEASE_INCIPIENT_UP;BLALOCK_ALZHEIMERS_DISEASE_UP;BRUINS_UVC_RESPONSE_EARLY_LATE;chr3p21;GCCATNTTG_V$YY1_Q6;GGCNKCCATNK_UNKNOWN;GGCNNMSMYNTTG_UNKNOWN;GRAESSMANN_APOPTOSIS_BY_DOXORUBICIN_DN;GSE13229_IMM_VS_INTMATURE_NKCELL_DN;GSE17721_0.5H_VS_12H_PAM3CSK4_BMDM_DN;GSE17721_LPS_VS_GARDIQUIMOD_16H_BMDM_UP;GSE22886_NAIVE_CD4_TCELL_VS_NKCELL_DN;GSE22886_NAIVE_CD8_TCELL_VS_NKCELL_DN;…	GO:0000280;GO:0006139;GO:0006259;GO:0006281;GO:0006310;GO:0006325;GO:0006338;GO:0006351;GO:0006355;GO:0006807;GO:0006950;GO:0006974;GO:0006996;GO:0007067;GO:0008152;GO:0009058;GO:0009059;GO:0009889;GO:0009987;GO:0010468;GO:0010556;GO:0016043;GO:0016070;GO:0016568;GO:0019219;GO:0019222;GO:0022402;GO:0022403;GO:0031323;GO:0031326;GO:0032774;GO:0033554;GO:0034641;GO:0034645;GO:0043170;GO:0044237;GO:…	GO:0000166;GO:0005488;GO:0005524;GO:0017076;GO:0030554;GO:0032553;GO:0032555;GO:0032559;GO:0035639	GO:0005634;GO:0016585;GO:0031011;GO:0032991;GO:0033202;GO:0043226;GO:0043227;GO:0043229;GO:0043231;GO:0043234;GO:0044422;GO:0044424;GO:0044427;GO:0044428;GO:0044446;GO:0044454;GO:0044464		SM00268	4	4	4	11.7	11.7	11.7	70.483	0	22.317	73867000	12	21.3343	21.0857	22.8502	0.001	0.001	0.001	0.001	23.2472	25.6175	0.001	0.001	0.001
	0.00991916	-0.0082442		1.48677	-0.963772	ACYP1_HUMAN	ACYP1_HUMANAcylphosphatase-1	P07311	ACYP1_HUMAN Acylphosphatase-1	ACYP1	ACYP1	NOG289322	3.6.1.7	cellular metabolic process;cellular process;metabolic process;phosphate-containing compound metabolic process;phosphorus metabolic process	acylphosphatase activity;catalytic activity;hydrolase activity;hydrolase activity, acting on acid anhydrides;hydrolase activity, acting on acid anhydrides, in phosphorus-containing anhydrides	extracellular membrane-bounded organelle;extracellular organelle;extracellular region part;extracellular vesicular exosome;membrane-bounded organelle;membrane-bounded vesicle;organelle;vesicle	Aminobenzoate degradation;Pyruvate metabolism	BENPORATH_CYCLING_GENES;BRUECKNER_TARGETS_OF_MIRLET7A3_UP;CHICAS_RB1_TARGETS_SENESCENT;chr14q24;CONCANNON_APOPTOSIS_BY_EPOXOMICIN_DN;CSR_EARLY_UP.V1_DN;DACOSTA_UV_RESPONSE_VIA_ERCC3_COMMON_UP;DACOSTA_UV_RESPONSE_VIA_ERCC3_UP;DAVICIONI_MOLECULAR_ARMS_VS_ERMS_UP;DIAZ_CHRONIC_MEYLOGENOUS_LEUKEMIA_UP;DOUGLAS_BMI1_TARGETS_UP;EIF4E_UP;ENK_UV_RESPONSE_KERATINOCYTE_DN;GATTGGY_V$NFY_Q6_01;GRUETZMANN_PANCR…	GO:0006793;GO:0006796;GO:0008152;GO:0009987;GO:0044237	GO:0003824;GO:0003998;GO:0016787;GO:0016817;GO:0016818	GO:0031982;GO:0031988;GO:0043226;GO:0043227;GO:0043230;GO:0044421;GO:0065010;GO:0070062			5	5	5	51.5	51.5	51.5	11.261	0	6.6437	247390000	49	24.8784	25.3242	24.6574	23.4268	23.5316	23.1115	25.1378	24.563	25.1344	21.8485	22.6863	22.6437
	0.310877	-0.147015		0.128848	0.395653	ADA_HUMAN	ADA_HUMANAdenosinedeaminase	P00813	ADA_HUMAN Adenosine deaminase	ADA	ADA	COG1816	3.5.4.4	2'-deoxyribonucleotide metabolic process;adenosine catabolic process;adenosine metabolic process;aging;amine transport;anatomical structure development;B cell activation;B cell activation involved in immune response;B cell differentiation;behavior;biological regulation;biosynthetic process;catabolic process;cell activation;cell activation involved in immune response;cell differentiation;cellular …	adenosine deaminase activity;binding;catalytic activity;cation binding;deaminase activity;hydrolase activity;hydrolase activity, acting on carbon-nitrogen (but not peptide) bonds;hydrolase activity, acting on carbon-nitrogen (but not peptide) bonds, in cyclic amidines;ion binding;metal ion binding;nucleoside binding;purine nucleoside binding;transition metal ion binding;zinc ion binding	cell body;cell junction;cell part;cell projection cytoplasm;cell projection part;cell surface;cytoplasm;cytoplasmic membrane-bounded vesicle lumen;cytoplasmic part;cytoplasmic vesicle part;cytosol;dendrite cytoplasm;external side of plasma membrane;extracellular region part;extracellular space;intracellular membrane-bounded organelle;intracellular organelle;intracellular organelle part;intracellu…	Primary immunodeficiency;Purine metabolism	BALDWIN_PRKCI_TARGETS_UP;BARIS_THYROID_CANCER_UP;BAUS_TFF2_TARGETS_UP;BOYLAN_MULTIPLE_MYELOMA_C_D_DN;BROWNE_HCMV_INFECTION_14HR_DN;CHARAFE_BREAST_CANCER_LUMINAL_VS_BASAL_DN;CHIARETTI_T_ALL_REFRACTORY_TO_THERAPY;chr20q13;COATES_MACROPHAGE_M1_VS_M2_UP;COLINA_TARGETS_OF_4EBP1_AND_4EBP2;DACOSTA_UV_RESPONSE_VIA_ERCC3_UP;DAVICIONI_MOLECULAR_ARMS_VS_ERMS_DN;DEAMINASE_ACTIVITY;DIAZ_CHRONIC_MEYLOGENOUS_LE…	GO:0000302;GO:0001666;GO:0001775;GO:0001821;GO:0001829;GO:0001889;GO:0001890;GO:0002027;GO:0002252;GO:0002263;GO:0002285;GO:0002312;GO:0002313;GO:0002314;GO:0002335;GO:0002366;GO:0002376;GO:0002521;GO:0002634;GO:0002636;GO:0002682;GO:0002683;GO:0002684;GO:0002685;GO:0002686;GO:0002694;GO:0002696;GO:0002819;GO:0002821;GO:0002822;GO:0002824;GO:0002902;GO:0002903;GO:0002905;GO:0002906;GO:0006139;GO:…	GO:0001882;GO:0001883;GO:0003824;GO:0004000;GO:0005488;GO:0008270;GO:0016787;GO:0016810;GO:0016814;GO:0019239;GO:0043167;GO:0043169;GO:0046872;GO:0046914	GO:0000323;GO:0005615;GO:0005737;GO:0005764;GO:0005773;GO:0005829;GO:0005886;GO:0009897;GO:0009986;GO:0016020;GO:0030054;GO:0031974;GO:0031983;GO:0032838;GO:0032839;GO:0043025;GO:0043226;GO:0043227;GO:0043229;GO:0043231;GO:0043233;GO:0044297;GO:0044421;GO:0044422;GO:0044424;GO:0044425;GO:0044433;GO:0044444;GO:0044446;GO:0044459;GO:0044463;GO:0044464;GO:0060205	REACT_1923		15	15	15	42.1	42.1	42.1	40.764	0	55.828	2375000000	161	27.7475	27.6951	28.186	28.7704	25.7853	25.1729	27.646	27.5866	27.955	26.9778	26.6424	27.2954
	0.597422	-1.86886	+	1.16412	-17.6729	ADA2_HUMAN	ADA2_HUMANAdenosinedeaminase2	Q9NZK5	ADA2_HUMAN Adenosine deaminase 2	ADA2	CECR1	COG1816	3.5.4.4	adenosine catabolic process;adenosine metabolic process;biosynthetic process;catabolic process;cellular aromatic compound metabolic process;cellular biosynthetic process;cellular catabolic process;cellular metabolic compound salvage;cellular metabolic process;cellular nitrogen compound biosynthetic process;cellular nitrogen compound catabolic process;cellular nitrogen compound metabolic process;c…	adenosine deaminase activity;adenosine receptor binding;binding;carbohydrate binding;catalytic activity;cation binding;deaminase activity;glycoprotein binding;glycosaminoglycan binding;G-protein-coupled receptor binding;growth factor activity;heparin binding;hydrolase activity;hydrolase activity, acting on carbon-nitrogen (but not peptide) bonds;hydrolase activity, acting on carbon-nitrogen (but …	extracellular region part;extracellular space		ATF2_UP.V1_DN;BENPORATH_ES_1;CASORELLI_ACUTE_PROMYELOCYTIC_LEUKEMIA_UP;chr22q11;DIAZ_CHRONIC_MEYLOGENOUS_LEUKEMIA_DN;DOUGLAS_BMI1_TARGETS_UP;GNF2_CARD15;GNF2_CASP1;GNF2_CD1D;GNF2_CD33;GNF2_FOS;GNF2_HCK;GNF2_ITGB2;GNF2_MCL1;GNF2_MYD88;GNF2_PECAM1;GNF2_TNFRSF1B;GSE10325_BCELL_VS_MYELOID_DN;GSE11057_CD4_CENT_MEM_VS_PBMC_DN;GSE11057_CD4_EFF_MEM_VS_PBMC_DN;GSE12845_IGD_POS_BLOOD_VS_DARKZONE_GC_TONSIL_…	GO:0006139;GO:0006144;GO:0006152;GO:0006154;GO:0006725;GO:0006807;GO:0007275;GO:0008152;GO:0009056;GO:0009058;GO:0009112;GO:0009113;GO:0009116;GO:0009119;GO:0009163;GO:0009164;GO:0009987;GO:0018130;GO:0032501;GO:0032502;GO:0034641;GO:0034654;GO:0034655;GO:0042278;GO:0042440;GO:0042451;GO:0042454;GO:0042455;GO:0043094;GO:0043096;GO:0043101;GO:0043103;GO:0044237;GO:0044238;GO:0044248;GO:0044249;GO:…	GO:0001664;GO:0001871;GO:0001948;GO:0003824;GO:0004000;GO:0005102;GO:0005488;GO:0005515;GO:0005539;GO:0008083;GO:0008201;GO:0008270;GO:0016787;GO:0016810;GO:0016814;GO:0019239;GO:0030246;GO:0030247;GO:0031685;GO:0042802;GO:0042803;GO:0043167;GO:0043169;GO:0043394;GO:0046872;GO:0046914;GO:0046983	GO:0005615;GO:0044421			10	10	10	28	28	28	58.933	0	34.584	156410000	40	23.3188	23.3958	22.529	26.2168	23.9698	24.1412	23.008	22.1111	18.518	0.001	0.001	21.3071
	1.35167	-0.853262		1.07168	-1.98367	ADA10_HUMAN	ADA10_HUMANDisintegrinandmetalloproteinasedomain-containingprotein10	O14672	ADA10_HUMAN Disintegrin and metalloproteinase domain-containing protein 10	ADAM10	ADAM10	NOG271989	3.4.24.81	axon guidance;biological regulation;cell activation;cell communication;cell surface receptor linked signaling pathway;cell-cell signaling;cellular component disassembly;cellular component disassembly at cellular level;cellular component organization;cellular component organization at cellular level;cellular component organization or biogenesis;cellular component organization or biogenesis at cell…	binding;catalytic activity;cation binding;endopeptidase activity;enzyme binding;hydrolase activity;identical protein binding;integrin binding;ion binding;kinase binding;metal ion binding;metalloendopeptidase activity;metallopeptidase activity;peptidase activity;peptidase activity, acting on L-amino acid peptides;protein binding;protein complex binding;protein dimerization activity;protein homodim…	adherens junction;anchoring junction;cell junction;cell part;cell surface;cell-substrate adherens junction;cell-substrate junction;cytoplasm;cytoplasmic membrane-bounded vesicle;cytoplasmic part;cytoplasmic vesicle;cytoskeletal part;endoplasmic reticulum part;extracellular membrane-bounded organelle;extracellular organelle;extracellular region part;extracellular vesicular exosome;focal adhesion;G…	Alzheimer's disease;Epithelial cell signaling in Helicobacter pylori infection	ADDYA_ERYTHROID_DIFFERENTIATION_BY_HEMIN;AGTCTTA,MIR-499;AKT_UP.V1_UP;AKT_UP_MTOR_DN.V1_UP;ATATGCA,MIR-448;ATGTACA,MIR-493;ATGTTTC,MIR-494;BIOPOLYMER_METABOLIC_PROCESS;BIOPOLYMER_MODIFICATION;BOQUEST_STEM_CELL_CULTURED_VS_FRESH_UP;BUYTAERT_PHOTODYNAMIC_THERAPY_STRESS_DN;BYSTROEM_CORRELATED_WITH_IL5_DN;BYSTRYKH_HEMATOPOIESIS_STEM_CELL_QTL_TRANS;CACGTG_V$MYC_Q2;CAGCTTT,MIR-320;CAGGTG_V$E12_Q6;CELL_…	GO:0001558;GO:0001701;GO:0001775;GO:0002274;GO:0002376;GO:0002682;GO:0002684;GO:0002685;GO:0002687;GO:0002688;GO:0002690;GO:0006464;GO:0006468;GO:0006508;GO:0006509;GO:0006793;GO:0006796;GO:0006935;GO:0007154;GO:0007162;GO:0007165;GO:0007166;GO:0007167;GO:0007169;GO:0007173;GO:0007219;GO:0007220;GO:0007229;GO:0007267;GO:0007411;GO:0008152;GO:0008284;GO:0009605;GO:0009790;GO:0009792;GO:0009987;GO:…	GO:0003824;GO:0004175;GO:0004222;GO:0005102;GO:0005178;GO:0005488;GO:0005515;GO:0008233;GO:0008237;GO:0008270;GO:0016787;GO:0019899;GO:0019900;GO:0019901;GO:0032403;GO:0042802;GO:0042803;GO:0043167;GO:0043169;GO:0046872;GO:0046914;GO:0046983;GO:0070011	GO:0005634;GO:0005737;GO:0005794;GO:0005798;GO:0005886;GO:0005912;GO:0005924;GO:0005925;GO:0009986;GO:0014069;GO:0016020;GO:0016021;GO:0016023;GO:0030054;GO:0030055;GO:0031224;GO:0031410;GO:0031982;GO:0031988;GO:0043226;GO:0043227;GO:0043229;GO:0043230;GO:0043231;GO:0044421;GO:0044422;GO:0044424;GO:0044425;GO:0044430;GO:0044431;GO:0044432;GO:0044444;GO:0044446;GO:0044456;GO:0044464;GO:0065010;GO:…	REACT_118572;REACT_118614;REACT_118636;REACT_118862;REACT_150401;REACT_160089;REACT_160106;REACT_160205;REACT_160243;REACT_160254;REACT_264198;REACT_9417	SM00050	11	11	11	19.9	19.9	19.9	84.141	0	75.098	318130000	59	25.139	25.5716	25.0491	26.0281	24.3764	23.7413	24.7119	24.5761	23.912	23.7373	22.5735	21.8841
	0.934216	15.0761		0	0	ADAM8_HUMAN	ADAM8_HUMANDisintegrinandmetalloproteinasedomain-containingprotein8	P78325	ADAM8_HUMAN Disintegrin and metalloproteinase domain-containing protein 8	ADAM8	ADAM8	NOG310718	3.4.24.-	activation of immune response;activation of innate immune response;activation of MAPK activity;activation of MAPK activity involved in innate immune response;anatomical structure formation involved in morphogenesis;anatomical structure morphogenesis;angiogenesis;biological adhesion;biological regulation;cell adhesion;cell chemotaxis;cell migration;cell morphogenesis;cell motility;cell-cell adhesi…	binding;calcium ion binding;catalytic activity;cation binding;cell adhesion molecule binding;endopeptidase activity;hydrolase activity;ion binding;metal ion binding;metalloendopeptidase activity;metallopeptidase activity;peptidase activity;peptidase activity, acting on L-amino acid peptides;protein binding;protein self-association;transition metal ion binding;zinc ion binding	alpha9-beta1 integrin-ADAM8 complex;cell part;cell surface;cytoplasm;cytoplasmic membrane-bounded vesicle;cytoplasmic part;cytoplasmic vesicle;cytoplasmic vesicle membrane;cytoplasmic vesicle part;cytoskeletal part;dense core granule membrane;endocytic vesicle;integral to membrane;integral to plasma membrane;intracellular membrane-bounded organelle;intracellular non-membrane-bounded organelle;int…		ACOSTA_PROLIFERATION_INDEPENDENT_MYC_TARGETS_DN;BASSO_CD40_SIGNALING_UP;BERTUCCI_MEDULLARY_VS_DUCTAL_BREAST_CANCER_UP;BILD_HRAS_ONCOGENIC_SIGNATURE;BILD_MYC_ONCOGENIC_SIGNATURE;BONOME_OVARIAN_CANCER_SURVIVAL_SUBOPTIMAL_DEBULKING;BURTON_ADIPOGENESIS_3;CHEN_METABOLIC_SYNDROM_NETWORK;chr10q26;COATES_MACROPHAGE_M1_VS_M2_DN;DIAZ_CHRONIC_MEYLOGENOUS_LEUKEMIA_UP;DURAND_STROMA_MAX_UP;E2F3_UP.V1_DN;EBAUER…	GO:0000187;GO:0000902;GO:0001525;GO:0001666;GO:0001817;GO:0001819;GO:0001932;GO:0002218;GO:0002253;GO:0002376;GO:0002523;GO:0002673;GO:0002675;GO:0002682;GO:0002684;GO:0002685;GO:0002687;GO:0002691;GO:0002693;GO:0002694;GO:0002696;GO:0002757;GO:0002758;GO:0002764;GO:0006355;GO:0006464;GO:0006468;GO:0006793;GO:0006796;GO:0006928;GO:0006935;GO:0006950;GO:0006952;GO:0006954;GO:0007155;GO:0007165;GO:…	GO:0003824;GO:0004175;GO:0004222;GO:0005488;GO:0005509;GO:0005515;GO:0008233;GO:0008237;GO:0008270;GO:0016787;GO:0043167;GO:0043169;GO:0043621;GO:0046872;GO:0046914;GO:0050839;GO:0070011	GO:0000323;GO:0002102;GO:0005737;GO:0005764;GO:0005767;GO:0005773;GO:0005886;GO:0005887;GO:0009986;GO:0012506;GO:0016020;GO:0016021;GO:0016023;GO:0030139;GO:0030141;GO:0030659;GO:0030667;GO:0031090;GO:0031224;GO:0031226;GO:0031410;GO:0031982;GO:0031988;GO:0032010;GO:0032127;GO:0032991;GO:0042581;GO:0043226;GO:0043227;GO:0043228;GO:0043229;GO:0043231;GO:0043232;GO:0043234;GO:0044422;GO:0044424;GO:…	REACT_118572	SM00050;SM00181;SM00608	3	3	3	8.9	8.9	8.9	88.77	0.00043706	4.0911	13806000	2	0.001	0.001	0.001	0.001	0.001	0.001	0.001	22.0616	23.1686	0.001	0.001	0.001
	2.43069	1.54363		0.637965	0.739531	DSRAD_HUMAN	DSRAD_HUMANDouble-strandedRNA-specificadenosinedeaminase	P55265	DSRAD_HUMAN Double-stranded RNA-specific adenosine deaminase	ADAR	ADAR	NOG292433	3.5.4.37	adenosine to inosine editing;anatomical structure development;base conversion or substitution editing;biological regulation;cell differentiation;cell surface receptor linked signaling pathway;cellular component assembly;cellular component assembly at cellular level;cellular component organization;cellular component organization at cellular level;cellular component organization or biogenesis;cellu…	adenosine deaminase activity;binding;catalytic activity;cation binding;deaminase activity;DNA binding;double-stranded RNA adenosine deaminase activity;hydrolase activity;hydrolase activity, acting on carbon-nitrogen (but not peptide) bonds;hydrolase activity, acting on carbon-nitrogen (but not peptide) bonds, in cyclic amidines;ion binding;metal ion binding;nucleic acid binding	cell part;cytoplasm;intracellular membrane-bounded organelle;intracellular non-membrane-bounded organelle;intracellular organelle;intracellular organelle part;intracellular part;membrane;membrane-bounded organelle;non-membrane-bounded organelle;nuclear part;nucleolus;nucleoplasm;nucleus;organelle;organelle part	Cytosolic DNA-sensing pathway;Measles	ACATTCC,MIR-1,MIR-206;BENPORATH_NANOG_TARGETS;BENPORATH_SOX2_TARGETS;BIOPOLYMER_METABOLIC_PROCESS;BIOPOLYMER_MODIFICATION;BOYAULT_LIVER_CANCER_SUBCLASS_G1_UP;BYSTROEM_CORRELATED_WITH_IL5_DN;chr1q21;CYTOPLASM;DER_IFN_ALPHA_RESPONSE_UP;DER_IFN_BETA_RESPONSE_UP;DER_IFN_GAMMA_RESPONSE_UP;DODD_NASOPHARYNGEAL_CARCINOMA_DN;EINAV_INTERFERON_SIGNATURE_IN_CANCER;GEISS_RESPONSE_TO_DSRNA_UP;GRADE_COLON_CANCE…	GO:0001649;GO:0001701;GO:0001959;GO:0001960;GO:0002200;GO:0002244;GO:0002252;GO:0002376;GO:0002566;GO:0002682;GO:0006139;GO:0006382;GO:0006396;GO:0006397;GO:0006605;GO:0006606;GO:0006611;GO:0006807;GO:0006810;GO:0006886;GO:0006913;GO:0006950;GO:0006952;GO:0006955;GO:0007165;GO:0007166;GO:0008152;GO:0009451;GO:0009607;GO:0009615;GO:0009790;GO:0009792;GO:0009966;GO:0009968;GO:0009987;GO:0010033;GO:…	GO:0003676;GO:0003677;GO:0003726;GO:0003824;GO:0004000;GO:0005488;GO:0016787;GO:0016810;GO:0016814;GO:0019239;GO:0043167;GO:0043169;GO:0046872	GO:0005634;GO:0005654;GO:0005730;GO:0005737;GO:0016020;GO:0043226;GO:0043227;GO:0043228;GO:0043229;GO:0043231;GO:0043232;GO:0044422;GO:0044424;GO:0044428;GO:0044446;GO:0044464	REACT_1231;REACT_1966;REACT_25162	SM00358;SM00550;SM00552	52	52	52	48.4	48.4	48.4	136.06	0	323.31	13166000000	739	29.6418	29.6667	29.5316	29.5458	28.1781	27.8815	31.6222	30.7626	31.0861	29.2047	29.1409	29.4783
	0.705431	1.21784	+	5.86448	-20.7388	RED1_HUMAN	RED1_HUMANDouble-strandedRNA-specificeditase1	P78563	RED1_HUMAN Double-stranded RNA-specific editase 1	ADARB1	ADARB1	NOG292433	3.5.4.37	adenosine to inosine editing;base conversion or substitution editing;biological regulation;cellular macromolecule metabolic process;cellular metabolic process;cellular nitrogen compound metabolic process;cellular process;defense response;defense response to virus;gene expression;immune effector process;immune response;immune system process;innate immune response;macromolecule metabolic process;ma…	adenosine deaminase activity;binding;catalytic activity;cation binding;deaminase activity;double-stranded RNA adenosine deaminase activity;double-stranded RNA binding;hydrolase activity;hydrolase activity, acting on carbon-nitrogen (but not peptide) bonds;hydrolase activity, acting on carbon-nitrogen (but not peptide) bonds, in cyclic amidines;ion binding;metal ion binding;mRNA binding;nucleic ac…	cell part;cytoplasm;intracellular membrane-bounded organelle;intracellular non-membrane-bounded organelle;intracellular organelle;intracellular organelle part;intracellular part;membrane-bounded organelle;non-membrane-bounded organelle;nuclear part;nucleolus;nucleoplasm;nucleus;organelle;organelle part		ATF2_S_UP.V1_DN;ATM_DN.V1_UP;BHAT_ESR1_TARGETS_VIA_AKT1_UP;BROWNE_HCMV_INFECTION_24HR_UP;BYSTRYKH_HEMATOPOIESIS_STEM_CELL_QTL_TRANS;chr21q22;CYCLIN_D1_KE_.V1_DN;DACOSTA_UV_RESPONSE_VIA_ERCC3_COMMON_DN;DACOSTA_UV_RESPONSE_VIA_ERCC3_DN;DOUGLAS_BMI1_TARGETS_UP;DURCHDEWALD_SKIN_CARCINOGENESIS_DN;E2F1_UP.V1_DN;FAELT_B_CLL_WITH_VH3_21_DN;GSE10325_CD4_TCELL_VS_LUPUS_CD4_TCELL_UP;GSE10856_CTRL_VS_TNFRSF6…	GO:0002252;GO:0002376;GO:0006139;GO:0006382;GO:0006396;GO:0006397;GO:0006807;GO:0006950;GO:0006952;GO:0006955;GO:0008152;GO:0008285;GO:0009451;GO:0009607;GO:0009615;GO:0009987;GO:0010467;GO:0016070;GO:0016071;GO:0016553;GO:0016556;GO:0030334;GO:0030336;GO:0032879;GO:0034641;GO:0040012;GO:0040013;GO:0042127;GO:0043170;GO:0043412;GO:0044237;GO:0044238;GO:0044260;GO:0045069;GO:0045070;GO:0045087;GO:…	GO:0003676;GO:0003723;GO:0003725;GO:0003726;GO:0003729;GO:0003824;GO:0004000;GO:0005488;GO:0016787;GO:0016810;GO:0016814;GO:0019239;GO:0043167;GO:0043169;GO:0046872	GO:0005634;GO:0005654;GO:0005730;GO:0005737;GO:0043226;GO:0043227;GO:0043228;GO:0043229;GO:0043231;GO:0043232;GO:0044422;GO:0044424;GO:0044428;GO:0044446;GO:0044464	REACT_1231;REACT_1966	SM00358;SM00552	6	6	6	14	14	14	80.762	0	26.815	199770000	18	23.6956	23.7905	24.2577	21.0109	21.3536	19.8549	24.963	23.8943	26.54	0.001	0.001	0.001
	0.853377	0.249415		0.742102	0.566912	ADDA_HUMAN;ADDB_HUMAN	ADDA_HUMANAlpha-adducin	P35611	ADDA_HUMAN Alpha-adducin	ADD1	ADD1	COG0235		actin cytoskeleton organization;actin filament bundle assembly;actin filament capping;actin filament organization;actin filament-based process;anatomical structure homeostasis;anatomical structure morphogenesis;apoptosis;barbed-end actin filament capping;biological regulation;cell communication;cell death;cell differentiation;cell morphogenesis;cell volume homeostasis;cellular component assembly;…	actin binding;actin filament binding;binding;cytoskeletal protein binding;identical protein binding;protein binding;protein dimerization activity;protein heterodimerization activity;protein homodimerization activity;spectrin binding;structural molecule activity;transcription factor binding	adherens junction;anchoring junction;cell junction;cell part;cell projection;cell projection part;cell-substrate adherens junction;cell-substrate junction;cytoplasmic part;cytoskeletal part;cytoskeleton;cytosol;dendritic spine;F-actin capping protein complex;focal adhesion;intermediate filament cytoskeleton;intracellular membrane-bounded organelle;intracellular non-membrane-bounded organelle;intr…		ACEVEDO_METHYLATED_IN_LIVER_CANCER_DN;ACTIN_BINDING;ATATGCA,MIR-448;BROWNE_HCMV_INFECTION_14HR_DN;BROWNE_HCMV_INFECTION_48HR_DN;CCCACAT,MIR-299-3P;CHANDRAN_METASTASIS_UP;CHAUHAN_RESPONSE_TO_METHOXYESTRADIOL_DN;CHICAS_RB1_TARGETS_CONFLUENT;chr4p16;CTTTGTA,MIR-524;CYTOSKELETAL_PROTEIN_BINDING;DACOSTA_UV_RESPONSE_VIA_ERCC3_TTD_UP;DAVICIONI_TARGETS_OF_PAX_FOXO1_FUSIONS_UP;DAVIES_MULTIPLE_MYELOMA_VS_M…	GO:0000902;GO:0001701;GO:0001894;GO:0006810;GO:0006884;GO:0006915;GO:0006921;GO:0006950;GO:0006984;GO:0006986;GO:0006996;GO:0007010;GO:0007015;GO:0007154;GO:0007165;GO:0007584;GO:0008064;GO:0008152;GO:0008219;GO:0009605;GO:0009653;GO:0009790;GO:0009792;GO:0009987;GO:0009991;GO:0010033;GO:0010639;GO:0012501;GO:0016043;GO:0016265;GO:0019538;GO:0019725;GO:0020027;GO:0022411;GO:0022603;GO:0022607;GO:…	GO:0003779;GO:0005198;GO:0005488;GO:0005515;GO:0008092;GO:0008134;GO:0030507;GO:0042802;GO:0042803;GO:0046982;GO:0046983;GO:0051015	GO:0005634;GO:0005654;GO:0005829;GO:0005856;GO:0005886;GO:0005912;GO:0005924;GO:0005925;GO:0008290;GO:0014069;GO:0016020;GO:0030054;GO:0030055;GO:0032991;GO:0042995;GO:0043005;GO:0043197;GO:0043226;GO:0043227;GO:0043228;GO:0043229;GO:0043231;GO:0043232;GO:0043234;GO:0044309;GO:0044422;GO:0044424;GO:0044428;GO:0044430;GO:0044444;GO:0044446;GO:0044456;GO:0044463;GO:0044464;GO:0045111;GO:0048471;GO:…	REACT_13541;REACT_18273;REACT_268444	SM01007	30	30	30	49.3	49.3	49.3	80.954	0	323.31	6625600000	522	29.3134	29.302	29.2869	28.7624	27.8618	27.7946	29.696	29.6754	29.2793	28.5225	28.5725	29.0246
	3.16789	1.00851		0.633552	-0.720384	ADDG_HUMAN	ADDG_HUMANGamma-adducin	Q9UEY8	ADDG_HUMAN Gamma-adducin	ADD3	ADD3	COG0235		cellular process;establishment of localization;transmembrane transport;transport	structural constituent of cytoskeleton;structural molecule activity	cell cortex;cell junction;cell part;cell-cell junction;chromosome;condensed chromosome;condensed nuclear chromosome;cytoplasm;cytoplasmic part;cytoskeleton;cytosol;intracellular non-membrane-bounded organelle;intracellular organelle;intracellular organelle part;intracellular part;membrane;non-membrane-bounded organelle;nuclear chromosome;nuclear part;nucleoplasm;organelle;organelle part;plasma me…		AAAYRNCTG_UNKNOWN;AACTGGA,MIR-145;AACTTT_UNKNOWN;ALFANO_MYC_TARGETS;AMBROSINI_FLAVOPIRIDOL_TREATMENT_TP53;ATGTTAA,MIR-302C;BAELDE_DIABETIC_NEPHROPATHY_DN;BENPORATH_NANOG_TARGETS;BENPORATH_NOS_TARGETS;BENPORATH_OCT4_TARGETS;BENPORATH_SOX2_TARGETS;BERNARD_PPAPDC1B_TARGETS_DN;BLALOCK_ALZHEIMERS_DISEASE_INCIPIENT_UP;BLALOCK_ALZHEIMERS_DISEASE_UP;BROWNE_HCMV_INFECTION_14HR_DN;BROWNE_HCMV_INFECTION_18H…	GO:0006810;GO:0009987;GO:0051234;GO:0055085	GO:0005198;GO:0005200	GO:0000228;GO:0000793;GO:0000794;GO:0005654;GO:0005694;GO:0005737;GO:0005829;GO:0005856;GO:0005886;GO:0005911;GO:0005938;GO:0016020;GO:0030054;GO:0043226;GO:0043228;GO:0043229;GO:0043232;GO:0044422;GO:0044424;GO:0044428;GO:0044444;GO:0044446;GO:0044464	REACT_268444	SM01007	30	30	30	44.8	44.8	44.8	79.154	0	230.47	5649800000	360	28.7841	28.7251	28.8926	28.9536	27.2334	27.8392	29.8152	29.6435	29.9686	27.1028	27.3554	27.4069
	3.46103	1.453		0.177881	0.280342	ADHX_HUMAN	ADHX_HUMANAlcoholdehydrogenaseclass-3	P11766	ADHX_HUMAN Alcohol dehydrogenase class-3	ADH5	ADH5	COG1062	1.1.1.-;1.1.1.1;1.1.1.284	aging;alcohol catabolic process;alcohol metabolic process;aldehyde catabolic process;biological regulation;catabolic process;cellular aldehyde metabolic process;cellular catabolic process;cellular lipid metabolic process;cellular macromolecule metabolic process;cellular metabolic process;cellular process;cellular protein metabolic process;developmental process;diterpenoid metabolic process;ethano…	alcohol dehydrogenase (NAD) activity;binding;carboxylic acid binding;catalytic activity;cation binding;electron carrier activity;fatty acid binding;formaldehyde dehydrogenase activity;ion binding;lipid binding;metal ion binding;monocarboxylic acid binding;oxidoreductase activity;oxidoreductase activity, acting on CH-OH group of donors;oxidoreductase activity, acting on the aldehyde or oxo group o…	cell part;cytoplasmic part;extracellular membrane-bounded organelle;extracellular organelle;extracellular region part;extracellular vesicular exosome;intracellular membrane-bounded organelle;intracellular organelle;intracellular part;membrane-bounded organelle;membrane-bounded vesicle;mitochondrion;nucleus;organelle;vesicle	Chloroalkane and chloroalkene degradation;Drug metabolism - cytochrome P450;Fatty acid metabolism;Glycolysis / Gluconeogenesis;Metabolism of xenobiotics by cytochrome P450;Methane metabolism;Naphthalene degradation;Retinol metabolism;Tyrosine metabolism	ALCOHOL_METABOLIC_PROCESS;BAE_BRCA1_TARGETS_UP;BLALOCK_ALZHEIMERS_DISEASE_DN;BROWNE_HCMV_INFECTION_16HR_DN;BRUINS_UVC_RESPONSE_LATE;CHIANG_LIVER_CANCER_SUBCLASS_UNANNOTATED_DN;chr4q23;DIAZ_CHRONIC_MEYLOGENOUS_LEUKEMIA_UP;DODD_NASOPHARYNGEAL_CARCINOMA_DN;ELECTRON_CARRIER_ACTIVITY;ENK_UV_RESPONSE_KERATINOCYTE_DN;FLECHNER_BIOPSY_KIDNEY_TRANSPLANT_OK_VS_DONOR_UP;FLECHNER_BIOPSY_KIDNEY_TRANSPLANT_REJE…	GO:0001523;GO:0002237;GO:0003008;GO:0003016;GO:0006066;GO:0006067;GO:0006068;GO:0006069;GO:0006081;GO:0006464;GO:0006629;GO:0006720;GO:0006721;GO:0006950;GO:0007568;GO:0007585;GO:0008152;GO:0008217;GO:0009056;GO:0009607;GO:0009987;GO:0010033;GO:0016101;GO:0017014;GO:0018119;GO:0018193;GO:0018198;GO:0019538;GO:0032496;GO:0032501;GO:0032502;GO:0034308;GO:0034310;GO:0042221;GO:0043170;GO:0043412;GO:…	GO:0003824;GO:0004022;GO:0005488;GO:0005504;GO:0008270;GO:0008289;GO:0009055;GO:0016491;GO:0016614;GO:0016616;GO:0016620;GO:0016903;GO:0018467;GO:0031406;GO:0033293;GO:0043167;GO:0043169;GO:0046872;GO:0046914;GO:0051903	GO:0005634;GO:0005739;GO:0031982;GO:0031988;GO:0043226;GO:0043227;GO:0043229;GO:0043230;GO:0043231;GO:0044421;GO:0044424;GO:0044444;GO:0044464;GO:0065010;GO:0070062			24	24	24	59.6	59.6	59.6	39.724	0	323.31	23429000000	756	30.478	30.6998	30.7017	30.317	28.7838	28.7717	31.9401	32.0141	32.2842	29.7552	28.9695	29.9887
	1.55238	2.71334		0.779453	-13.3732	MTND_HUMAN	MTND_HUMAN1,2-dihydroxy-3-keto-5-methylthiopentenedioxygenase	Q9BV57	MTND_HUMAN 1,2-dihydroxy-3-keto-5-methylthiopentene dioxygenase	ADI1	ADI1	COG1791	1.13.11.54	amine biosynthetic process;amine metabolic process;amino acid salvage;aspartate family amino acid biosynthetic process;aspartate family amino acid metabolic process;biosynthetic process;carboxylic acid biosynthetic process;carboxylic acid metabolic process;cellular amine metabolic process;cellular amino acid biosynthetic process;cellular amino acid metabolic process;cellular biogenic amine metabo…	acireductone dioxygenase [iron(II)-requiring] activity;binding;catalytic activity;cation binding;dioxygenase activity;ion binding;iron ion binding;metal ion binding;oxidoreductase activity;oxidoreductase activity, acting on single donors with incorporation of molecular oxygen;oxidoreductase activity, acting on single donors with incorporation of molecular oxygen, incorporation of two atoms of oxy…	cell part;cytoplasm;cytoplasmic part;cytosol;Golgi apparatus;intracellular membrane-bounded organelle;intracellular organelle;intracellular organelle part;intracellular part;membrane;membrane-bounded organelle;nuclear part;nucleoplasm;nucleus;organelle;organelle part;plasma membrane	Cysteine and methionine metabolism	ACEVEDO_LIVER_CANCER_DN;ACEVEDO_NORMAL_TISSUE_ADJACENT_TO_LIVER_TUMOR_DN;AMINE_METABOLIC_PROCESS;AMINO_ACID_AND_DERIVATIVE_METABOLIC_PROCESS;AMINO_ACID_METABOLIC_PROCESS;BLALOCK_ALZHEIMERS_DISEASE_DN;BOYAULT_LIVER_CANCER_SUBCLASS_G12_DN;CADWELL_ATG16L1_TARGETS_DN;CARBOXYLIC_ACID_METABOLIC_PROCESS;chr2p25;CYTOPLASM;DAIRKEE_TERT_TARGETS_UP;DOUGLAS_BMI1_TARGETS_UP;GARY_CD5_TARGETS_DN;GNF2_CEBPA;GRAD…	GO:0000096;GO:0000097;GO:0006082;GO:0006520;GO:0006555;GO:0006576;GO:0006595;GO:0006790;GO:0006807;GO:0008152;GO:0008652;GO:0009058;GO:0009066;GO:0009067;GO:0009086;GO:0009308;GO:0009309;GO:0009987;GO:0016053;GO:0019509;GO:0019752;GO:0034641;GO:0042180;GO:0043094;GO:0043102;GO:0043436;GO:0044106;GO:0044237;GO:0044238;GO:0044249;GO:0044271;GO:0044272;GO:0044281;GO:0044283;GO:0046394;GO:0071265;GO:…	GO:0003824;GO:0005488;GO:0005506;GO:0010309;GO:0016491;GO:0016701;GO:0016702;GO:0043167;GO:0043169;GO:0046872;GO:0046914;GO:0051213	GO:0005634;GO:0005654;GO:0005737;GO:0005794;GO:0005829;GO:0005886;GO:0016020;GO:0043226;GO:0043227;GO:0043229;GO:0043231;GO:0044422;GO:0044424;GO:0044428;GO:0044444;GO:0044446;GO:0044464	REACT_75881		4	4	4	34.6	34.6	34.6	21.498	0	5.5535	144470000	11	21.2368	21.8561	23.6234	21.715	20.3349	21.7616	25.4421	24.2273	25.187	0.001	23.6899	0.001
	0.699215	-0.737097		0.068186	0.0883102	ADK_HUMAN	ADK_HUMANAdenosinekinase	P55263	ADK_HUMAN Adenosine kinase	ADK	ADK	COG0524	2.7.1.20	2'-deoxyribonucleotide biosynthetic process;2'-deoxyribonucleotide metabolic process;adenosine metabolic process;AMP biosynthetic process;AMP metabolic process;AMP salvage;biological regulation;biosynthetic process;cell proliferation;cellular aromatic compound metabolic process;cellular biosynthetic process;cellular metabolic compound salvage;cellular metabolic process;cellular nitrogen compound …	adenosine kinase activity;adenyl nucleotide binding;adenyl ribonucleotide binding;ATP binding;binding;catalytic activity;cation binding;ion binding;kinase activity;metal ion binding;nucleobase-containing compound kinase activity;nucleoside kinase activity;nucleotide binding;phosphotransferase activity, alcohol group as acceptor;purine nucleotide binding;purine ribonucleoside triphosphate binding;…	cell part;cytoplasm;cytoplasmic part;cytosol;intracellular organelle part;intracellular part;nuclear part;nucleoplasm;organelle part	Purine metabolism	ALONSO_METASTASIS_UP;BIOSYNTHETIC_PROCESS;BLALOCK_ALZHEIMERS_DISEASE_DN;CACGTG_V$MYC_Q2;CAGGTG_V$E12_Q6;CAIRO_HEPATOBLASTOMA_DN;CATTTCA,MIR-203;CCAWNWWNNNGGC_UNKNOWN;CELLULAR_BIOSYNTHETIC_PROCESS;chr10q22;COLDREN_GEFITINIB_RESISTANCE_DN;CREIGHTON_ENDOCRINE_THERAPY_RESISTANCE_1;DAVICIONI_MOLECULAR_ARMS_VS_ERMS_UP;DAZARD_RESPONSE_TO_UV_SCC_UP;DELYS_THYROID_CANCER_UP;DEURIG_T_CELL_PROLYMPHOCYTIC_LEU…	GO:0002682;GO:0002684;GO:0002694;GO:0002696;GO:0006139;GO:0006144;GO:0006163;GO:0006164;GO:0006167;GO:0006175;GO:0006725;GO:0006753;GO:0006807;GO:0007623;GO:0008152;GO:0008283;GO:0008284;GO:0009058;GO:0009112;GO:0009116;GO:0009117;GO:0009119;GO:0009123;GO:0009124;GO:0009126;GO:0009127;GO:0009141;GO:0009142;GO:0009144;GO:0009145;GO:0009150;GO:0009151;GO:0009152;GO:0009153;GO:0009156;GO:0009161;GO:…	GO:0000166;GO:0003824;GO:0004001;GO:0005488;GO:0005524;GO:0016301;GO:0016740;GO:0016772;GO:0016773;GO:0017076;GO:0019205;GO:0019206;GO:0030554;GO:0032553;GO:0032555;GO:0032559;GO:0035639;GO:0043167;GO:0043169;GO:0046872	GO:0005654;GO:0005737;GO:0005829;GO:0044422;GO:0044424;GO:0044428;GO:0044444;GO:0044446;GO:0044464	REACT_1923		20	20	20	52.8	52.8	52.8	40.545	0	157.57	1261800000	137	27.1166	27.3473	27.5155	26.7049	25.6026	25.5305	27.1914	26.9056	25.6711	25.7257	25.8586	26.5187
	0.225658	0.215717		0.327872	0.508233	ADNP_HUMAN	ADNP_HUMANActivity-dependentneuroprotectorhomeoboxprotein	Q9H2P0	ADNP_HUMAN Activity-dependent neuroprotector homeobox protein	ADNP	ADNP	NOG41028		biological regulation;biosynthetic process;cellular biosynthetic process;cellular macromolecule biosynthetic process;cellular macromolecule metabolic process;cellular metabolic process;cellular nitrogen compound metabolic process;cellular process;macromolecule biosynthetic process;macromolecule metabolic process;metabolic process;negative regulation of apoptosis;negative regulation of biological …	binding;cation binding;chromatin binding;DNA binding;ion binding;metal ion binding;nucleic acid binding	cell part;extracellular region part;extracellular space;intracellular membrane-bounded organelle;intracellular organelle;intracellular part;membrane-bounded organelle;nucleus;organelle		AACTTT_UNKNOWN;AMUNDSON_RESPONSE_TO_ARSENITE;ATAACCT,MIR-154;ATCTTGC,MIR-31;BIDUS_METASTASIS_UP;BORCZUK_MALIGNANT_MESOTHELIOMA_UP;CACGTG_V$MYC_Q2;CAGGTG_V$E12_Q6;CATTGTYY_V$SOX9_B1;CCAWNWWNNNGGC_UNKNOWN;CHEN_HOXA5_TARGETS_9HR_UP;chr20q13;CTGCAGY_UNKNOWN;CTTTGT_V$LEF1_Q2;CTTTGTA,MIR-524;DACOSTA_UV_RESPONSE_VIA_ERCC3_DN;DAZARD_RESPONSE_TO_UV_NHEK_DN;DAZARD_RESPONSE_TO_UV_SCC_DN;DODD_NASOPHARYNGEAL_…	GO:0006139;GO:0006351;GO:0006355;GO:0006807;GO:0008152;GO:0009058;GO:0009059;GO:0009889;GO:0009987;GO:0010468;GO:0010556;GO:0010941;GO:0016070;GO:0019219;GO:0019222;GO:0031323;GO:0031326;GO:0032774;GO:0034641;GO:0034645;GO:0042981;GO:0043066;GO:0043067;GO:0043069;GO:0043170;GO:0043523;GO:0043524;GO:0044237;GO:0044238;GO:0044249;GO:0044260;GO:0048519;GO:0048523;GO:0050789;GO:0050794;GO:0051171;GO:…	GO:0003676;GO:0003677;GO:0003682;GO:0005488;GO:0043167;GO:0043169;GO:0046872	GO:0005615;GO:0005634;GO:0043226;GO:0043227;GO:0043229;GO:0043231;GO:0044421;GO:0044424;GO:0044464		SM00355;SM00389	22	22	22	28.9	28.9	28.9	123.56	0	58.643	410600000	80	25.4745	25.1706	25.2071	24.9598	23.5525	23.5354	25.699	24.7987	26.0017	25.3779	24.1655	24.029
	0.111748	0.21281		0.467816	7.66741	AEDO_HUMAN	AEDO_HUMAN2-aminoethanethioldioxygenase	Q96SZ5	AEDO_HUMAN 2-aminoethanethiol dioxygenase	ADO	ADO	NOG301373	1.13.11.19		binding;catalytic activity;cation binding;cysteamine dioxygenase activity;dioxygenase activity;ion binding;metal ion binding;oxidoreductase activity;oxidoreductase activity, acting on single donors with incorporation of molecular oxygen;oxidoreductase activity, acting on single donors with incorporation of molecular oxygen, incorporation of two atoms of oxygen	cell part;cytoplasmic part;intracellular membrane-bounded organelle;intracellular organelle;intracellular part;membrane-bounded organelle;mitochondrion;organelle	Taurine and hypotaurine metabolism	AAGCCAT,MIR-135A,MIR-135B;ACTAYRNNNCCCR_UNKNOWN;ACTWSNACTNY_UNKNOWN;AGCGCTT,MIR-518F,MIR-518E,MIR-518A;ALCALAY_AML_BY_NPM1_LOCALIZATION_UP;BENPORATH_NANOG_TARGETS;BONOME_OVARIAN_CANCER_SURVIVAL_SUBOPTIMAL_DEBULKING;BUYTAERT_PHOTODYNAMIC_THERAPY_STRESS_DN;CAGCTG_V$AP4_Q5;chr10q21;DACOSTA_UV_RESPONSE_VIA_ERCC3_TTD_UP;DACOSTA_UV_RESPONSE_VIA_ERCC3_UP;DACOSTA_UV_RESPONSE_VIA_ERCC3_XPCS_UP;DELACROIX_R…		GO:0003824;GO:0005488;GO:0016491;GO:0016701;GO:0016702;GO:0043167;GO:0043169;GO:0046872;GO:0047800;GO:0051213	GO:0005739;GO:0043226;GO:0043227;GO:0043229;GO:0043231;GO:0044424;GO:0044444;GO:0044464			7	7	7	39.6	39.6	39.6	29.751	0	6.9975	81288000	9	22.0088	23.9563	23.3324	21.8001	20.7074	0.001	22.6348	23.3423	23.9588	21.7192	22.1844	21.6071
	2.59115	2.67586		0.410621	0.814479	ADPGK_HUMAN	ADPGK_HUMANADP-dependentglucokinase	Q9BRR6	ADPGK_HUMAN ADP-dependent glucokinase	ADPGK	ADPGK	COG4809	2.7.1.147	alcohol catabolic process;alcohol metabolic process;carbohydrate catabolic process;carbohydrate metabolic process;catabolic process;cellular carbohydrate catabolic process;cellular carbohydrate metabolic process;cellular metabolic process;cellular process;generation of precursor metabolites and energy;glucose catabolic process;glucose metabolic process;glycolysis;hexose catabolic process;hexose m…	ADP-specific glucokinase activity;binding;catalytic activity;cation binding;ion binding;kinase activity;metal ion binding;phosphotransferase activity, alcohol group as acceptor;transferase activity;transferase activity, transferring phosphorus-containing groups	cell part;cytoplasmic part;endoplasmic reticulum;extracellular region;intracellular membrane-bounded organelle;intracellular organelle;intracellular part;membrane;membrane-bounded organelle;organelle	Glycolysis / Gluconeogenesis	AACTGGA,MIR-145;ACATTCC,MIR-1,MIR-206;BYSTRYKH_HEMATOPOIESIS_STEM_CELL_QTL_CIS;chr15q24;CTTTGT_V$LEF1_Q2;GGGCGGR_V$SP1_Q6;GKCGCNNNNNNNTGAYG_UNKNOWN;GNF2_BNIP2;GNF2_DDX5;GNF2_STAT6;GNF2_TYK2;GOLDRATH_NAIVE_VS_MEMORY_CD8_TCELL_UP;GSE10325_MYELOID_VS_LUPUS_MYELOID_DN;GSE12366_GC_VS_MEMORY_BCELL_DN;GSE13306_TREG_VS_TCONV_UP;GSE15750_DAY6_VS_DAY10_TRAF6KO_EFF_CD8_TCELL_DN;GSE17721_LPS_VS_GARDIQUIMOD_1…	GO:0005975;GO:0005996;GO:0006006;GO:0006007;GO:0006066;GO:0006091;GO:0006096;GO:0008152;GO:0009056;GO:0009987;GO:0016052;GO:0019318;GO:0019320;GO:0044237;GO:0044238;GO:0044262;GO:0044275;GO:0044281;GO:0044282;GO:0046164;GO:0046365	GO:0003824;GO:0005488;GO:0016301;GO:0016740;GO:0016772;GO:0016773;GO:0043167;GO:0043169;GO:0043843;GO:0046872	GO:0005576;GO:0005783;GO:0016020;GO:0043226;GO:0043227;GO:0043229;GO:0043231;GO:0044424;GO:0044444;GO:0044464			9	9	9	33	33	33	54.088	0	113.01	849830000	52	24.6583	24.9168	24.7025	25.777	23.1768	23.5972	27.7885	26.6551	27.8616	24.5062	25.2226	25.2656
	1.64452	0.682369		0.261857	0.42308	ARHL2_HUMAN	ARHL2_HUMANADP-riboseglycohydrolaseARH3	Q9NX46	ARHL2_HUMAN ADP-ribose glycohydrolase ARH3	ADPRHL2	ADPRHL2	COG1397	3.2.1.143	cellular process;cellular response to chemical stimulus;cellular response to oxidative stress;cellular response to oxygen radical;cellular response to reactive oxygen species;cellular response to stimulus;cellular response to stress;cellular response to superoxide;response to chemical stimulus;response to inorganic substance;response to oxidative stress;response to oxygen radical;response to reac…	binding;catalytic activity;cation binding;hydrolase activity;hydrolase activity, acting on glycosyl bonds;hydrolase activity, hydrolyzing O-glycosyl compounds;ion binding;metal ion binding;poly(ADP-ribose) glycohydrolase activity	cell part;cytoplasmic part;intracellular organelle lumen;intracellular organelle part;intracellular part;membrane-enclosed lumen;mitochondrial matrix;mitochondrial part;nuclear part;nucleoplasm;organelle lumen;organelle part		BYSTRYKH_HEMATOPOIESIS_STEM_CELL_QTL_TRANS;chr1p34;GCM_NF2;GSE10094_LCMV_VS_LISTERIA_IND_EFF_CD4_TCELL_DN;GSE14000_UNSTIM_VS_4H_LPS_DC_DN;GSE14769_UNSTIM_VS_240MIN_LPS_BMDM_UP;GSE17721_CTRL_VS_GARDIQUIMOD_12H_BMDM_DN;GSE17721_LPS_VS_PAM3CSK4_2H_BMDM_DN;GSE2706_LPS_VS_R848_AND_LPS_8H_STIM_DC_UP;GSE3337_4H_VS_16H_IFNG_IN_CD8POS_DC_UP;GSE36392_TYPE_2_MYELOID_VS_MAC_IL25_TREATED_LUNG_DN;GSE37416_CTRL…	GO:0000302;GO:0000303;GO:0000305;GO:0006950;GO:0006979;GO:0009987;GO:0010035;GO:0033554;GO:0034599;GO:0034614;GO:0042221;GO:0050896;GO:0051716;GO:0070887;GO:0071450;GO:0071451	GO:0003824;GO:0004553;GO:0004649;GO:0005488;GO:0016787;GO:0016798;GO:0043167;GO:0043169;GO:0046872	GO:0005654;GO:0005759;GO:0031974;GO:0043233;GO:0044422;GO:0044424;GO:0044428;GO:0044429;GO:0044444;GO:0044446;GO:0044464;GO:0070013			15	15	15	54.3	54.3	54.3	38.946	0	132.32	3322300000	212	28.179	28.2737	28.3698	27.766	26.0352	25.8449	29.1965	28.6015	29.0715	27.3783	26.7462	26.7908
	2.31229	1.67735		2.4836	1.6572	ADRM1_HUMAN	ADRM1_HUMANProteasomalubiquitinreceptorADRM1	Q16186	ADRM1_HUMAN Proteasomal ubiquitin receptor ADRM1	ADRM1	ADRM1	NOG288027		biological regulation;biosynthetic process;cellular biosynthetic process;cellular component assembly;cellular component assembly at cellular level;cellular component organization;cellular component organization at cellular level;cellular component organization or biogenesis;cellular component organization or biogenesis at cellular level;cellular macromolecular complex assembly;cellular macromolec…	binding;endopeptidase activator activity;endopeptidase regulator activity;enzyme activator activity;enzyme binding;enzyme regulator activity;peptidase activator activity;peptidase regulator activity;protease binding;proteasome binding;protein binding;protein complex binding	cell part;cytoplasm;integral to membrane;integral to plasma membrane;intracellular organelle part;intracellular part;intrinsic to membrane;intrinsic to plasma membrane;macromolecular complex;membrane;membrane part;nuclear part;nucleoplasm;organelle part;plasma membrane;plasma membrane part;proteasome complex;protein complex		BIOPOLYMER_METABOLIC_PROCESS;CELL_FRACTION;CELLULAR_COMPONENT_ASSEMBLY;CELLULAR_MACROMOLECULE_METABOLIC_PROCESS;CELLULAR_PROTEIN_COMPLEX_ASSEMBLY;CELLULAR_PROTEIN_METABOLIC_PROCESS;CONCANNON_APOPTOSIS_BY_EPOXOMICIN_UP;CSR_EARLY_UP.V1_UP;CTTTGT_V$LEF1_Q2;ENZYME_ACTIVATOR_ACTIVITY;ENZYME_REGULATOR_ACTIVITY;GRADE_COLON_CANCER_UP;GSE12845_IGD_NEG_BLOOD_VS_NAIVE_TONSIL_BCELL_UP;GSE14026_TH1_VS_TH17_UP…	GO:0006139;GO:0006354;GO:0006368;GO:0006461;GO:0006807;GO:0008152;GO:0009058;GO:0009987;GO:0010950;GO:0010952;GO:0016043;GO:0016070;GO:0019222;GO:0022607;GO:0032774;GO:0034621;GO:0034622;GO:0034641;GO:0043085;GO:0043170;GO:0043248;GO:0043623;GO:0043933;GO:0044093;GO:0044237;GO:0044238;GO:0044249;GO:0044260;GO:0050789;GO:0050790;GO:0051336;GO:0051345;GO:0052547;GO:0052548;GO:0065003;GO:0065007;GO:…	GO:0002020;GO:0005488;GO:0005515;GO:0008047;GO:0016504;GO:0019899;GO:0030234;GO:0032403;GO:0061133;GO:0061134;GO:0061135;GO:0070628	GO:0000502;GO:0005654;GO:0005737;GO:0005886;GO:0005887;GO:0016020;GO:0016021;GO:0031224;GO:0031226;GO:0032991;GO:0043234;GO:0044422;GO:0044424;GO:0044425;GO:0044428;GO:0044446;GO:0044459;GO:0044464			8	8	8	19.7	19.7	19.7	42.153	0	50.349	991040000	119	25.0566	25.8259	25.9767	25.0043	24.6085	24.3474	27.4557	27.2737	27.1618	26.5717	25.96	26.4001
	3.35457	1.95397		1.85617	1.90027	PUR8_HUMAN	PUR8_HUMANAdenylosuccinatelyase	P30566	PUR8_HUMAN Adenylosuccinate lyase	ADSL	ADSL	COG0015	4.3.2.2	aerobic respiration;AMP biosynthetic process;AMP metabolic process;biosynthetic process;cellular aromatic compound metabolic process;cellular biosynthetic process;cellular component assembly;cellular component organization;cellular component organization or biogenesis;cellular metabolic process;cellular nitrogen compound biosynthetic process;cellular nitrogen compound metabolic process;cellular p…	(S)-2-(5-amino-1-(5-phospho-D-ribosyl)imidazole-4-carboxamido)succinate AMP-lyase (fumarate-forming) activity;amidine-lyase activity;carbon-nitrogen lyase activity;catalytic activity;lyase activity;N6-(1,2-dicarboxyethyl)AMP AMP-lyase (fumarate-forming) activity	cell part;cytoplasmic part;cytosol;intracellular membrane-bounded organelle;intracellular organelle;intracellular part;membrane-bounded organelle;mitochondrion;organelle	Alanine, aspartate and glutamate metabolism;Purine metabolism	ALONSO_METASTASIS_UP;BOYAULT_LIVER_CANCER_SUBCLASS_G3_UP;BRUINS_UVC_RESPONSE_LATE;BYSTRYKH_HEMATOPOIESIS_STEM_CELL_QTL_TRANS;CAIRO_HEPATOBLASTOMA_CLASSES_UP;chr22q13;CREIGHTON_ENDOCRINE_THERAPY_RESISTANCE_1;CYTOPLASM;DODD_NASOPHARYNGEAL_CARCINOMA_DN;ENK_UV_RESPONSE_EPIDERMIS_UP;FEVR_CTNNB1_TARGETS_DN;GARY_CD5_TARGETS_DN;GCGNNANTTCC_UNKNOWN;GGCNRNWCTTYS_UNKNOWN;GNF2_MSH6;GNF2_NS;GNF2_RAN;GNF2_RFC3…	GO:0001666;GO:0006091;GO:0006139;GO:0006144;GO:0006163;GO:0006164;GO:0006167;GO:0006188;GO:0006189;GO:0006461;GO:0006725;GO:0006753;GO:0006807;GO:0006950;GO:0007584;GO:0008152;GO:0009058;GO:0009060;GO:0009112;GO:0009117;GO:0009123;GO:0009124;GO:0009126;GO:0009127;GO:0009150;GO:0009152;GO:0009156;GO:0009161;GO:0009165;GO:0009167;GO:0009168;GO:0009259;GO:0009260;GO:0009605;GO:0009987;GO:0009991;GO:…	GO:0003824;GO:0004018;GO:0016829;GO:0016840;GO:0016842;GO:0070626	GO:0005739;GO:0005829;GO:0043226;GO:0043227;GO:0043229;GO:0043231;GO:0044424;GO:0044444;GO:0044464	REACT_1776	SM00998	22	22	22	64.9	64.9	64.9	54.889	0	248.58	9304600000	452	28.8346	28.6642	28.5643	28.373	27.336	26.9857	30.9619	30.5565	30.4066	29.4265	29.1704	29.7986
	2.41262	1.89013		3.48728	2.43947	PURA2_HUMAN	PURA2_HUMANAdenylosuccinatesynthetaseisozyme2	P30520	PURA2_HUMAN Adenylosuccinate synthetase isozyme 2	ADSS	ADSS	COG0104	6.3.4.4	amine metabolic process;AMP biosynthetic process;AMP metabolic process;aspartate family amino acid metabolic process;aspartate metabolic process;biosynthetic process;carboxylic acid metabolic process;cellular amine metabolic process;cellular amino acid metabolic process;cellular aromatic compound metabolic process;cellular biosynthetic process;cellular ketone metabolic process;cellular metabolic …	adenylosuccinate synthase activity;anion binding;binding;catalytic activity;cation binding;GTP binding;guanyl nucleotide binding;guanyl ribonucleotide binding;ion binding;ligase activity;ligase activity, forming carbon-nitrogen bonds;magnesium ion binding;metal ion binding;nucleotide binding;phosphate ion binding;purine nucleotide binding;purine ribonucleoside triphosphate binding;purine ribonucl…	cell part;cytoplasm;cytoplasmic part;cytosol;extracellular membrane-bounded organelle;extracellular organelle;extracellular region part;extracellular vesicular exosome;intracellular part;membrane;membrane-bounded organelle;membrane-bounded vesicle;organelle;plasma membrane;vesicle	Alanine, aspartate and glutamate metabolism;Purine metabolism	AAAGACA,MIR-511;ACTAYRNNNCCCR_UNKNOWN;BIOSYNTHETIC_PROCESS;BYSTRYKH_HEMATOPOIESIS_STEM_CELL_QTL_TRANS;CACGTG_V$MYC_Q2;CELLULAR_BIOSYNTHETIC_PROCESS;CTCNANGTGNY_UNKNOWN;CTTTGT_V$LEF1_Q2;DIAZ_CHRONIC_MEYLOGENOUS_LEUKEMIA_UP;GARCIA_TARGETS_OF_FLI1_AND_DAX1_DN;GAVIN_FOXP3_TARGETS_CLUSTER_T4;GGGCGGR_V$SP1_Q6;GGGYGTGNY_UNKNOWN;GRUETZMANN_PANCREATIC_CANCER_UP;GSE1432_1H_VS_6H_IFNG_MICROGLIA_UP;GSE14769_…	GO:0002376;GO:0006082;GO:0006139;GO:0006144;GO:0006163;GO:0006164;GO:0006167;GO:0006520;GO:0006531;GO:0006725;GO:0006753;GO:0006807;GO:0008152;GO:0009058;GO:0009066;GO:0009112;GO:0009117;GO:0009123;GO:0009124;GO:0009126;GO:0009127;GO:0009150;GO:0009152;GO:0009156;GO:0009161;GO:0009165;GO:0009167;GO:0009168;GO:0009259;GO:0009260;GO:0009308;GO:0009628;GO:0009987;GO:0010033;GO:0010035;GO:0014070;GO:…	GO:0000166;GO:0000287;GO:0003824;GO:0004019;GO:0005488;GO:0005525;GO:0016874;GO:0016879;GO:0017076;GO:0019001;GO:0032553;GO:0032555;GO:0032561;GO:0035639;GO:0042301;GO:0043167;GO:0043168;GO:0043169;GO:0046872	GO:0005737;GO:0005829;GO:0005886;GO:0016020;GO:0031982;GO:0031988;GO:0043226;GO:0043227;GO:0043230;GO:0044421;GO:0044424;GO:0044444;GO:0044464;GO:0065010;GO:0070062	REACT_1776	SM00788	14	14	14	36.6	36.6	36.6	50.097	0	51.019	1868100000	105	26.7591	26.3948	26.4139	24.8822	24.2966	24.3147	27.9539	28.3305	28.9538	26.7593	27.0387	27.0139
+	5.59794	20.0262	+	8.80048	22.0845	AEBP2_HUMAN	AEBP2_HUMANZincfingerproteinAEBP2	Q6ZN18	AEBP2_HUMAN Zinc finger protein AEBP2	AEBP2	AEBP2	NOG291563		biological regulation;cellular component organization;cellular component organization at cellular level;cellular component organization or biogenesis;cellular component organization or biogenesis at cellular level;cellular process;chromatin modification;chromatin organization;chromosome organization;gene expression;macromolecule metabolic process;metabolic process;negative regulation of biologica…	binding;cation binding;core promoter proximal region DNA binding;core promoter proximal region sequence-specific DNA binding;DNA binding;ion binding;metal ion binding;nucleic acid binding;nucleic acid binding transcription factor activity;protein binding transcription factor activity;regulatory region DNA binding;regulatory region nucleic acid binding;RNA polymerase II core promoter proximal regi…	cell part;ESC/E(Z) complex;histone methyltransferase complex;intracellular organelle part;intracellular part;macromolecular complex;methyltransferase complex;nuclear part;nucleoplasm;nucleoplasm part;organelle part;PcG protein complex;protein complex		AAGCACT,MIR-520F;AAGCCAT,MIR-135A,MIR-135B;ACCAAAG,MIR-9;ACTGTAG,MIR-139;AGCACTT,MIR-93,MIR-302A,MIR-302B,MIR-302C,MIR-302D,MIR-372,MIR-373,MIR-520E,MIR-520A,MIR-526B,MIR-520B,MIR-520C,MIR-520D;AGTCTTA,MIR-499;CAGTATT,MIR-200B,MIR-200C,MIR-429;chr12p12;CTACTGT,MIR-199A;CTTTGCA,MIR-527;DELACROIX_RAR_BOUND_ES;FOSTER_TOLERANT_MACROPHAGE_DN;GCACCTT,MIR-18A,MIR-18B;GCCATNTTG_V$YY1_Q6;GGGAGGRR_V$MAZ_Q6…	GO:0006325;GO:0006996;GO:0008152;GO:0009892;GO:0009987;GO:0010467;GO:0010468;GO:0010605;GO:0010629;GO:0016043;GO:0016568;GO:0019222;GO:0040029;GO:0043170;GO:0045814;GO:0048519;GO:0050789;GO:0051276;GO:0060255;GO:0065007;GO:0071840;GO:0071841;GO:0071842	GO:0000975;GO:0000976;GO:0000977;GO:0000978;GO:0000981;GO:0000982;GO:0000987;GO:0000988;GO:0000989;GO:0001012;GO:0001067;GO:0001071;GO:0001078;GO:0001159;GO:0003676;GO:0003677;GO:0003700;GO:0003712;GO:0003714;GO:0005488;GO:0043167;GO:0043169;GO:0043565;GO:0044212;GO:0046872	GO:0005654;GO:0031519;GO:0032991;GO:0034708;GO:0035097;GO:0035098;GO:0043234;GO:0044422;GO:0044424;GO:0044428;GO:0044446;GO:0044451;GO:0044464	REACT_264352;REACT_268728	SM00355	3	3	3	7.7	7.7	7.7	54.466	0	6.0758	17008000	7	0.001	0.001	0.001	0.001	0.001	0.001	20.8595	19.0988	20.1234	22.2423	22.08	21.9341
+	5.87825	24.647	+	4.46306	25.2103	AFAD_HUMAN	AFAD_HUMANAfadin	P55196	AFAD_HUMAN Afadin	AFDN	MLLT4	NOG291597		adherens junction organization;biological adhesion;biological regulation;cell adhesion;cell communication;cell junction assembly;cell junction organization;cell-cell junction organization;cell-cell signaling;cellular component assembly;cellular component assembly at cellular level;cellular component organization;cellular component organization at cellular level;cellular component organization or …	binding;enzyme binding;GTPase binding;protein binding;protein C-terminus binding;Ras GTPase binding;small GTPase binding	adherens junction;anchoring junction;apical part of cell;cell junction;cell part;cell-cell adherens junction;cell-cell junction;cytoplasm;cytoplasmic part;cytosol;intracellular organelle part;intracellular part;membrane;nuclear part;nucleoplasm;organelle part;plasma membrane	Adherens junction;Leukocyte transendothelial migration;Tight junction	BASAKI_YBX1_TARGETS_DN;BENPORATH_CYCLING_GENES;BRUINS_UVC_RESPONSE_LATE;CELL_CELL_SIGNALING;CELL_JUNCTION;chr6q27;CTTTGT_V$LEF1_Q2;DODD_NASOPHARYNGEAL_CARCINOMA_UP;GCM_GSTA4;GCM_NF2;GRESHOCK_CANCER_COPY_NUMBER_UP;GSE11057_CD4_EFF_MEM_VS_PBMC_UP;GSE11057_EFF_MEM_VS_CENT_MEM_CD4_TCELL_UP;GSE11057_NAIVE_VS_CENT_MEMORY_CD4_TCELL_DN;GSE11057_NAIVE_VS_EFF_MEMORY_CD4_TCELL_DN;GSE12366_NAIVE_VS_MEMORY_BC…	GO:0006140;GO:0007154;GO:0007155;GO:0007165;GO:0007267;GO:0009894;GO:0009987;GO:0016043;GO:0019219;GO:0019222;GO:0022607;GO:0022610;GO:0023052;GO:0030811;GO:0031323;GO:0031329;GO:0033121;GO:0033124;GO:0034329;GO:0034330;GO:0034332;GO:0043085;GO:0043087;GO:0043547;GO:0044093;GO:0045216;GO:0050789;GO:0050790;GO:0050794;GO:0050896;GO:0051171;GO:0051336;GO:0051345;GO:0051716;GO:0065007;GO:0065009;GO:…	GO:0005488;GO:0005515;GO:0008022;GO:0017016;GO:0019899;GO:0031267;GO:0051020	GO:0005654;GO:0005737;GO:0005829;GO:0005886;GO:0005911;GO:0005912;GO:0005913;GO:0016020;GO:0030054;GO:0044422;GO:0044424;GO:0044428;GO:0044444;GO:0044446;GO:0044464;GO:0045177;GO:0070161	REACT_19195	SM00228;SM00240;SM00314	4	4	4	2.9	2.9	2.9	206.8	0	7.2859	283990000	8	0.001	0.001	0.001	0.001	0.001	0.001	25.7117	24.0228	24.2096	26.1556	22.7553	26.7229
+	6.91385	-22.0949	+	1.032	15.7939	AFF4_HUMAN	AFF4_HUMANAF4/FMR2familymember4	Q9UHB7	AFF4_HUMAN AF4/FMR2 family member 4	AFF4	AFF4	NOG121636		anatomical structure development;biosynthetic process;cell development;cellular biosynthetic process;cellular developmental process;cellular macromolecule biosynthetic process;cellular macromolecule metabolic process;cellular metabolic process;cellular nitrogen compound metabolic process;cellular process;cellular process involved in reproduction;developmental process;developmental process involve…	nucleic acid binding transcription factor activity;sequence-specific DNA binding transcription factor activity	cell part;chromatin;chromosomal part;cytoplasmic part;intracellular membrane-bounded organelle;intracellular non-membrane-bounded organelle;intracellular organelle;intracellular organelle part;intracellular part;macromolecular complex;membrane-bounded organelle;mitochondrion;non-membrane-bounded organelle;nuclear part;nucleolus;nucleoplasm;nucleoplasm part;nucleus;organelle;organelle part;protein…		AAANWWTGC_UNKNOWN;ACAGGGT,MIR-10A,MIR-10B;ACEVEDO_LIVER_CANCER_UP;ACEVEDO_LIVER_TUMOR_VS_NORMAL_ADJACENT_TISSUE_UP;ACTGTGA,MIR-27A,MIR-27B;ACTTTAT,MIR-142-5P;ATACTGT,MIR-144;ATGCTGC,MIR-103,MIR-107;BIOPOLYMER_METABOLIC_PROCESS;BUYTAERT_PHOTODYNAMIC_THERAPY_STRESS_UP;CACGTG_V$MYC_Q2;CACTGTG,MIR-128A,MIR-128B;CACTTTG,MIR-520G,MIR-520H;CAGCTG_V$AP4_Q5;CAGCTTT,MIR-320;CATRRAGC_UNKNOWN;CATTTCA,MIR-203…	GO:0003006;GO:0006139;GO:0006351;GO:0006366;GO:0006807;GO:0007281;GO:0007286;GO:0008152;GO:0009058;GO:0009059;GO:0009987;GO:0016070;GO:0022414;GO:0032502;GO:0032774;GO:0034641;GO:0034645;GO:0043170;GO:0044237;GO:0044238;GO:0044249;GO:0044260;GO:0048468;GO:0048610;GO:0048856;GO:0048869;GO:0090304	GO:0001071;GO:0003700	GO:0000785;GO:0005634;GO:0005654;GO:0005730;GO:0005739;GO:0008023;GO:0032991;GO:0035327;GO:0043226;GO:0043227;GO:0043228;GO:0043229;GO:0043231;GO:0043232;GO:0043234;GO:0044422;GO:0044424;GO:0044427;GO:0044428;GO:0044444;GO:0044446;GO:0044451;GO:0044464			4	4	4	4.9	4.9	4.9	127.46	0.00043621	4.0548	41843000	9	21.5682	22.3645	22.3551	21.5609	0.001	0.001	0.001	0.001	0.001	22.9581	23.0754	22.9112
	1.63854	0.612707		0.40977	-0.554258	AFG32_HUMAN	AFG32_HUMANAFG3-likeprotein2	Q9Y4W6	AFG32_HUMAN AFG3-like protein 2	AFG3L2	AFG3L2	COG0465	3.4.24.-	anatomical structure development;anatomical structure morphogenesis;axon ensheathment;axonogenesis;biological regulation;cell development;cell part morphogenesis;cell projection morphogenesis;cell projection organization;cellular component morphogenesis;cellular component organization;cellular component organization at cellular level;cellular component organization or biogenesis;cellular componen…	adenyl nucleotide binding;adenyl ribonucleotide binding;ATP binding;binding;catalytic activity;cation binding;endopeptidase activity;hydrolase activity;ion binding;metal ion binding;metalloendopeptidase activity;metallopeptidase activity;nucleotide binding;peptidase activity;peptidase activity, acting on L-amino acid peptides;protein binding;purine nucleotide binding;purine ribonucleoside triphos…	cell part;cytoplasmic part;integral to membrane;intracellular membrane-bounded organelle;intracellular organelle;intracellular organelle part;intracellular part;intrinsic to membrane;membrane;membrane part;membrane-bounded organelle;mitochondrial inner membrane;mitochondrial membrane;mitochondrial part;mitochondrion;organelle;organelle inner membrane;organelle membrane;organelle part		BASSO_B_LYMPHOCYTE_NETWORK;chr18p11;CROMER_METASTASIS_DN;CYTOPLASM;CYTOPLASMIC_PART;ENK_UV_RESPONSE_KERATINOCYTE_DN;GROSS_HYPOXIA_VIA_ELK3_AND_HIF1A_UP;GSE13485_DAY3_VS_DAY7_YF17D_VACCINE_PBMC_UP;GSE14000_TRANSLATED_RNA_VS_MRNA_4H_LPS_DC_UP;GSE14000_UNSTIM_VS_4H_LPS_DC_TRANSLATED_RNA_UP;GSE14308_TH2_VS_TH17_UP;GSE17721_0.5H_VS_8H_GARDIQUIMOD_BMDM_UP;GSE17721_CPG_VS_GARDIQUIMOD_2H_BMDM_DN;GSE17721…	GO:0006944;GO:0006996;GO:0007005;GO:0007006;GO:0007007;GO:0007272;GO:0007409;GO:0007528;GO:0008053;GO:0008152;GO:0008366;GO:0009605;GO:0009653;GO:0009987;GO:0016043;GO:0016044;GO:0016265;GO:0016485;GO:0019538;GO:0021675;GO:0030030;GO:0032502;GO:0032989;GO:0032990;GO:0034982;GO:0040008;GO:0040014;GO:0042407;GO:0042552;GO:0043170;GO:0044237;GO:0044238;GO:0044260;GO:0044267;GO:0048284;GO:0048468;GO:…	GO:0000166;GO:0003824;GO:0004175;GO:0004222;GO:0005488;GO:0005515;GO:0005524;GO:0008233;GO:0008237;GO:0008270;GO:0016787;GO:0017076;GO:0030554;GO:0032553;GO:0032555;GO:0032559;GO:0035639;GO:0043167;GO:0043169;GO:0046872;GO:0046914;GO:0051082;GO:0070011	GO:0005739;GO:0005743;GO:0016020;GO:0016021;GO:0019866;GO:0031090;GO:0031224;GO:0031966;GO:0043226;GO:0043227;GO:0043229;GO:0043231;GO:0044422;GO:0044424;GO:0044425;GO:0044429;GO:0044444;GO:0044446;GO:0044464		SM00382	27	27	26	41.7	41.7	40.7	88.583	0	149.18	1574600000	163	27.5143	27.033	27.1884	26.8977	25.5968	25.3898	27.8471	28.0277	27.699	25.8044	25.6597	24.7575
	1.32435	1.46128		0.0485196	-0.21205	AFTIN_HUMAN	AFTIN_HUMANAftiphilin	Q6ULP2	AFTIN_HUMAN Aftiphilin	AFTPH	AFTPH	NOG40359		establishment of localization;establishment of protein localization;protein transport;transport	binding;clathrin binding;protein binding	AP-1 adaptor complex;AP-type membrane coat adaptor complex;cell part;clathrin adaptor complex;cytoplasm;cytoplasmic part;cytoplasmic vesicle part;cytosol;Golgi apparatus;Golgi apparatus part;intracellular membrane-bounded organelle;intracellular organelle;intracellular organelle part;intracellular part;macromolecular complex;membrane part;membrane-bounded organelle;nuclear part;nucleoplasm;nucleu…		chr2p14;CLATHRIN_COATED_VESICLE;COATED_MEMBRANE;COATED_VESICLE;COATED_VESICLE_MEMBRANE;CYTOPLASM;CYTOPLASMIC_MEMBRANE_BOUND_VESICLE;CYTOPLASMIC_PART;CYTOPLASMIC_VESICLE;CYTOPLASMIC_VESICLE_MEMBRANE;CYTOPLASMIC_VESICLE_PART;CYTOSOL;ENDOMEMBRANE_SYSTEM;GOLGI_APPARATUS;GOLGI_APPARATUS_PART;GOLGI_ASSOCIATED_VESICLE;GOLGI_MEMBRANE;GSE13484_12H_VS_3H_YF17D_VACCINE_STIM_PBMC_DN;GSE13493_CD4INTCD8POS_VS_…	GO:0006810;GO:0015031;GO:0045184;GO:0051234	GO:0005488;GO:0005515;GO:0030276	GO:0005634;GO:0005654;GO:0005737;GO:0005794;GO:0005829;GO:0030119;GO:0030121;GO:0030131;GO:0032991;GO:0043226;GO:0043227;GO:0043229;GO:0043231;GO:0043234;GO:0044422;GO:0044424;GO:0044425;GO:0044428;GO:0044431;GO:0044433;GO:0044444;GO:0044446;GO:0044464			6	6	6	9.7	9.7	9.7	102.11	0	25.083	155760000	24	22.4052	23.8022	23.8851	22.2306	21.6205	20.9414	24.4538	24.9389	25.0837	21.2876	23.9466	18.9221
	0.179612	-0.140156		2.03543	-2.3467	ASPG_HUMAN	ASPG_HUMANN(4)-(beta-N-acetylglucosaminyl)-L-asparaginase	P20933	ASPG_HUMAN N(4)-(beta-N-acetylglucosaminyl)-L-asparaginase	AGA	AGA	COG1446	3.5.1.26	cellular macromolecule metabolic process;cellular metabolic process;cellular process;cellular protein metabolic process;macromolecule metabolic process;macromolecule modification;metabolic process;primary metabolic process;protein deglycosylation;protein maturation;protein metabolic process;protein modification process	asparaginase activity;catalytic activity;hydrolase activity;hydrolase activity, acting on carbon-nitrogen (but not peptide) bonds;hydrolase activity, acting on carbon-nitrogen (but not peptide) bonds, in linear amides;N4-(beta-N-acetylglucosaminyl)-L-asparaginase activity;peptidase activity	cell part;cytoplasmic part;endoplasmic reticulum;extracellular membrane-bounded organelle;extracellular organelle;extracellular region part;extracellular vesicular exosome;intracellular membrane-bounded organelle;intracellular organelle;intracellular part;lysosome;lytic vacuole;membrane-bounded organelle;membrane-bounded vesicle;organelle;vacuole;vesicle	Lysosome;Other glycan degradation	BIOPOLYMER_METABOLIC_PROCESS;BIOPOLYMER_MODIFICATION;BOYAULT_LIVER_CANCER_SUBCLASS_G3_UP;BRUINS_UVC_RESPONSE_VIA_TP53_GROUP_B;CELLULAR_MACROMOLECULE_METABOLIC_PROCESS;CELLULAR_PROTEIN_METABOLIC_PROCESS;CHICAS_RB1_TARGETS_CONFLUENT;chr4q23;DEURIG_T_CELL_PROLYMPHOCYTIC_LEUKEMIA_UP;GGATTA_V$PITX2_Q2;GLYCOPROTEIN_CATABOLIC_PROCESS;GLYCOPROTEIN_METABOLIC_PROCESS;GSE14308_TH2_VS_INDUCED_TREG_UP;GSE1430…	GO:0006464;GO:0006517;GO:0008152;GO:0009987;GO:0019538;GO:0043170;GO:0043412;GO:0044237;GO:0044238;GO:0044260;GO:0044267;GO:0051604	GO:0003824;GO:0003948;GO:0004067;GO:0008233;GO:0016787;GO:0016810;GO:0016811	GO:0000323;GO:0005764;GO:0005773;GO:0005783;GO:0031982;GO:0031988;GO:0043226;GO:0043227;GO:0043229;GO:0043230;GO:0043231;GO:0044421;GO:0044424;GO:0044444;GO:0044464;GO:0065010;GO:0070062			5	5	5	17.3	17.3	17.3	37.208	0	25.84	205710000	27	25.1614	24.9034	24.3357	23.1801	23.5334	22.8001	24.9331	24.6959	24.351	21.178	21.3658	19.9298
	0.505147	-8.87062		0.884797	-2.53652	AGAP2_HUMAN;AGAP1_HUMAN	AGAP2_HUMANArf-GAPwithGTPase,ANKrepeatandPHdomain-containingprotein2	Q99490	AGAP2_HUMAN Arf-GAP with GTPase, ANK repeat and PH domain-containing protein 2	AGAP2	AGAP2	COG5347		axon guidance;biological regulation;cellular process;cellular response to stimulus;chemotaxis;establishment of localization;establishment of protein localization;intracellular signal transduction;locomotion;negative regulation of apoptosis;negative regulation of biological process;negative regulation of catabolic process;negative regulation of cell death;negative regulation of cellular process;ne…	binding;cation binding;enzyme activator activity;enzyme regulator activity;GTP binding;GTPase activator activity;GTPase regulator activity;guanyl nucleotide binding;guanyl ribonucleotide binding;ion binding;metal ion binding;nucleoside-triphosphatase regulator activity;nucleotide binding;purine nucleotide binding;purine ribonucleoside triphosphate binding;purine ribonucleotide binding;ribonucleot…	cell part;cytoplasmic part;extracellular membrane-bounded organelle;extracellular organelle;extracellular region part;extracellular vesicular exosome;intracellular membrane-bounded organelle;intracellular non-membrane-bounded organelle;intracellular organelle;intracellular organelle part;intracellular part;membrane;membrane-bounded organelle;membrane-bounded vesicle;mitochondrion;non-membrane-bou…	Endocytosis	BENPORATH_ES_WITH_H3K27ME3;BLALOCK_ALZHEIMERS_DISEASE_DN;CAGCTG_V$AP4_Q5;CAGGTG_V$E12_Q6;CCTGTGA,MIR-513;chr12q13;DCA_UP.V1_DN;GGGAGGRR_V$MAZ_Q6;GGGCGGR_V$SP1_Q6;GRADE_COLON_CANCER_UP;GSE1448_ANTI_VALPHA2_VS_VBETA5_DP_THYMOCYTE_DN;GSE1460_DP_THYMOCYTE_VS_NAIVE_CD4_TCELL_CORD_BLOOD_DN;GSE15324_NAIVE_VS_ACTIVATED_CD8_TCELL_UP;GSE17721_LPS_VS_GARDIQUIMOD_24H_BMDM_UP;GSE18791_CTRL_VS_NEWCASTLE_VIRUS_…	GO:0006810;GO:0006935;GO:0007165;GO:0007264;GO:0007411;GO:0009605;GO:0009892;GO:0009894;GO:0009895;GO:0009987;GO:0010605;GO:0010941;GO:0015031;GO:0019222;GO:0035556;GO:0040011;GO:0042176;GO:0042177;GO:0042221;GO:0042330;GO:0042981;GO:0043066;GO:0043067;GO:0043069;GO:0043523;GO:0043524;GO:0045184;GO:0048519;GO:0048523;GO:0050789;GO:0050794;GO:0050896;GO:0051234;GO:0051246;GO:0051248;GO:0051716;GO:…	GO:0000166;GO:0005096;GO:0005488;GO:0005525;GO:0008047;GO:0008270;GO:0017076;GO:0019001;GO:0030234;GO:0030695;GO:0032553;GO:0032555;GO:0032561;GO:0035639;GO:0043167;GO:0043169;GO:0046872;GO:0046914;GO:0060589	GO:0005634;GO:0005730;GO:0005739;GO:0016020;GO:0031982;GO:0031988;GO:0043226;GO:0043227;GO:0043228;GO:0043229;GO:0043230;GO:0043231;GO:0043232;GO:0044421;GO:0044422;GO:0044424;GO:0044428;GO:0044444;GO:0044446;GO:0044464;GO:0065010;GO:0070062	REACT_22237	SM00105;SM00233;SM00248	10	10	10	10.2	10.2	10.2	124.67	0	26.769	182870000	31	24.6095	24.2156	23.8649	25.9231	23.3189	23.682	23.0674	23.0097	0.001	21.5992	23.6853	20.03
	0.157223	0.0592155		1.74073	2.26804	AGFG1_HUMAN	AGFG1_HUMANArf-GAPdomainandFGrepeat-containingprotein1	P52594	AGFG1_HUMAN Arf-GAP domain and FG repeat-containing protein 1	AGFG1	AGFG1	COG5347		acrosome assembly;anatomical structure formation involved in morphogenesis;cellular component assembly;cellular component assembly at cellular level;cellular component assembly involved in morphogenesis;cellular component organization;cellular component organization at cellular level;cellular component organization or biogenesis;cellular component organization or biogenesis at cellular level;cell…	binding;cation binding;DNA binding;ion binding;metal ion binding;nucleic acid binding;RNA binding;transition metal ion binding;zinc ion binding	cell body;cell part;cell projection;cytoplasmic membrane-bounded vesicle;cytoplasmic part;cytoplasmic vesicle;intracellular membrane-bounded organelle;intracellular organelle;intracellular organelle part;intracellular part;macromolecular complex;membrane part;membrane-bounded organelle;membrane-bounded vesicle;neuronal cell body;nuclear part;nuclear pore;organelle;organelle part;pore complex;prot…		ACCAAAG,MIR-9;ATGCTGC,MIR-103,MIR-107;ATGTAGC,MIR-221,MIR-222;BENPORATH_CYCLING_GENES;BENPORATH_PROLIFERATION;BROWNE_HCMV_INFECTION_14HR_DN;BYSTRYKH_HEMATOPOIESIS_STEM_CELL_QTL_TRANS;CAGTATT,MIR-200B,MIR-200C,MIR-429;CAIRO_HEPATOBLASTOMA_CLASSES_UP;CELLULAR_LOCALIZATION;chr2q36;CUI_TCF21_TARGETS_2_DN;DACOSTA_UV_RESPONSE_VIA_ERCC3_DN;DACOSTA_UV_RESPONSE_VIA_ERCC3_XPCS_DN;DEBIASI_APOPTOSIS_BY_REOVI…	GO:0001675;GO:0003006;GO:0006405;GO:0006406;GO:0006810;GO:0006913;GO:0006996;GO:0006997;GO:0007010;GO:0007275;GO:0007289;GO:0009987;GO:0010927;GO:0015931;GO:0016043;GO:0022412;GO:0022414;GO:0022607;GO:0032501;GO:0032502;GO:0045103;GO:0045104;GO:0045109;GO:0046907;GO:0048610;GO:0048646;GO:0050657;GO:0050658;GO:0051028;GO:0051168;GO:0051169;GO:0051234;GO:0051236;GO:0051649;GO:0071840;GO:0071841;GO:…	GO:0003676;GO:0003677;GO:0003723;GO:0005488;GO:0008270;GO:0043167;GO:0043169;GO:0046872;GO:0046914	GO:0005643;GO:0016023;GO:0031410;GO:0031982;GO:0031988;GO:0032991;GO:0042995;GO:0043025;GO:0043226;GO:0043227;GO:0043229;GO:0043231;GO:0043234;GO:0044297;GO:0044422;GO:0044424;GO:0044425;GO:0044428;GO:0044444;GO:0044446;GO:0044464;GO:0046930		SM00105	10	10	9	25.4	25.4	23.5	58.259	0	93.62	1749900000	131	27.218	27.5023	27.3807	26.297	24.6888	24.5172	27.3906	27.64	27.248	27.7027	27.1643	27.44
	0.0970303	-0.0521851		0.430733	-1.16516	AGFG2_HUMAN	AGFG2_HUMANArf-GAPdomainandFGrepeat-containingprotein2	O95081	AGFG2_HUMAN Arf-GAP domain and FG repeat-containing protein 2	AGFG2	AGFG2	NOG293564			binding;cation binding;ion binding;metal ion binding;transition metal ion binding;zinc ion binding	cell part;membrane		AAGCACT,MIR-520F;AGCACTT,MIR-93,MIR-302A,MIR-302B,MIR-302C,MIR-302D,MIR-372,MIR-373,MIR-520E,MIR-520A,MIR-526B,MIR-520B,MIR-520C,MIR-520D;BLALOCK_ALZHEIMERS_DISEASE_INCIPIENT_UP;BLALOCK_ALZHEIMERS_DISEASE_UP;BORCZUK_MALIGNANT_MESOTHELIOMA_DN;CAGTGTT,MIR-141,MIR-200A;chr7q22;CORDENONSI_YAP_CONSERVED_SIGNATURE;CREIGHTON_ENDOCRINE_THERAPY_RESISTANCE_3;CROMER_METASTASIS_UP;CTTTGA_V$LEF1_Q2;DODD_NASOP…		GO:0005488;GO:0008270;GO:0043167;GO:0043169;GO:0046872;GO:0046914	GO:0016020;GO:0044464		SM00105	6	5	5	18.1	15.8	15.8	48.962	0	36.417	230130000	33	25.1162	24.4833	24.9127	24.6171	22.8418	21.7645	24.7212	24.8785	24.756	20.3059	22.5963	22.8258
	4.06275	0.991833		3.89614	3.45651	AGK_HUMAN	AGK_HUMANAcylglycerolkinase,mitochondrial	Q53H12	AGK_HUMAN Acylglycerol kinase, mitochondrial	AGK	AGK	COG1597	2.7.1.107;2.7.1.94	activation of protein kinase activity;activation of protein kinase C activity by G-protein coupled receptor protein signaling pathway;biological regulation;biosynthetic process;cell surface receptor linked signaling pathway;cellular biosynthetic process;cellular lipid metabolic process;cellular metabolic process;cellular process;cellular response to stimulus;ceramide biosynthetic process;ceramide…	acylglycerol kinase activity;adenyl nucleotide binding;adenyl ribonucleotide binding;ATP binding;binding;catalytic activity;ceramide kinase activity;diacylglycerol kinase activity;kinase activity;lipid kinase activity;NAD+ kinase activity;nucleotide binding;phosphotransferase activity, alcohol group as acceptor;purine nucleotide binding;purine ribonucleoside triphosphate binding;purine ribonucleo…	cell part;cytoplasmic part;intracellular membrane-bounded organelle;intracellular organelle;intracellular organelle part;intracellular part;membrane;membrane-bounded organelle;mitochondrial membrane;mitochondrial part;mitochondrion;organelle;organelle membrane;organelle part	Glycerolipid metabolism	BRUINS_UVC_RESPONSE_LATE;chr7q34;CTTTGT_V$LEF1_Q2;DODD_NASOPHARYNGEAL_CARCINOMA_DN;GGGACCA,MIR-133A,MIR-133B;GOBERT_OLIGODENDROCYTE_DIFFERENTIATION_DN;GRAESSMANN_APOPTOSIS_BY_DOXORUBICIN_DN;GRAESSMANN_RESPONSE_TO_MC_AND_DOXORUBICIN_DN;GSE14000_4H_VS_16H_LPS_DC_TRANSLATED_RNA_DN;GSE1460_DP_VS_CD4_THYMOCYTE_UP;GSE15659_CD45RA_NEG_CD4_TCELL_VS_ACTIVATED_TREG_UP;GSE15659_CD45RA_NEG_CD4_TCELL_VS_NONSU…	GO:0001932;GO:0006629;GO:0006643;GO:0006665;GO:0006672;GO:0007165;GO:0007166;GO:0007186;GO:0007205;GO:0008152;GO:0008610;GO:0009058;GO:0009987;GO:0019220;GO:0019222;GO:0030148;GO:0031323;GO:0031399;GO:0032147;GO:0032268;GO:0033674;GO:0042325;GO:0043085;GO:0043549;GO:0044093;GO:0044237;GO:0044238;GO:0044249;GO:0044255;GO:0045859;GO:0045860;GO:0046467;GO:0046486;GO:0046513;GO:0046519;GO:0046520;GO:…	GO:0000166;GO:0001727;GO:0001729;GO:0003824;GO:0003951;GO:0004143;GO:0005488;GO:0005524;GO:0016301;GO:0016740;GO:0016772;GO:0016773;GO:0017076;GO:0030554;GO:0032553;GO:0032555;GO:0032559;GO:0035639;GO:0047620	GO:0005739;GO:0016020;GO:0031090;GO:0031966;GO:0043226;GO:0043227;GO:0043229;GO:0043231;GO:0044422;GO:0044424;GO:0044429;GO:0044444;GO:0044446;GO:0044464		SM00046	21	21	21	57.8	57.8	57.8	47.137	0	195.74	4321600000	190	28.0019	27.9727	28.134	25.7236	25.4884	25.5474	28.9713	29.017	29.0958	28.6531	29.4342	29.0415
	0.427821	0.415835		0.233549	0.348237	GDE_HUMAN	GDE_HUMANGlycogendebranchingenzyme	P35573	GDE_HUMAN Glycogen debranching enzyme	AGL	AGL	COG3408	2.4.1.25;3.2.1.33	alcohol metabolic process;biosynthetic process;carbohydrate biosynthetic process;carbohydrate catabolic process;carbohydrate metabolic process;catabolic process;cellular biosynthetic process;cellular carbohydrate biosynthetic process;cellular carbohydrate catabolic process;cellular carbohydrate metabolic process;cellular glucan metabolic process;cellular macromolecule biosynthetic process;cellula…	4-alpha-glucanotransferase activity;alpha-glucosidase activity;amylo-alpha-1,6-glucosidase activity;binding;carbohydrate binding;catalytic activity;glucosidase activity;glycogen debranching enzyme activity;hydrolase activity;hydrolase activity, acting on glycosyl bonds;hydrolase activity, hydrolyzing O-glycosyl compounds;pattern binding;polysaccharide binding;transferase activity;transferase acti…	cell part;cytoplasm;cytoplasmic part;cytosol;endoplasmic reticulum;inclusion body;intracellular membrane-bounded organelle;intracellular organelle;intracellular organelle part;intracellular part;isoamylase complex;macromolecular complex;membrane-bounded organelle;nuclear part;nucleoplasm;organelle;organelle part;protein complex;sarcoplasmic reticulum	Starch and sucrose metabolism	BOQUEST_STEM_CELL_UP;BROWNE_HCMV_INFECTION_24HR_UP;CAGGTG_V$E12_Q6;CAIRO_HEPATOBLASTOMA_DN;chr1p21;DAZARD_RESPONSE_TO_UV_SCC_UP;DIAZ_CHRONIC_MEYLOGENOUS_LEUKEMIA_UP;EBAUER_TARGETS_OF_PAX3_FOXO1_FUSION_UP;EGFR_UP.V1_DN;ENK_UV_RESPONSE_KERATINOCYTE_DN;ERB2_UP.V1_DN;FLECHNER_BIOPSY_KIDNEY_TRANSPLANT_OK_VS_DONOR_UP;FLECHNER_BIOPSY_KIDNEY_TRANSPLANT_REJECTED_VS_OK_DN;FLECHNER_PBL_KIDNEY_TRANSPLANT_OK_…	GO:0000271;GO:0000272;GO:0005975;GO:0005976;GO:0005977;GO:0005978;GO:0005980;GO:0005996;GO:0006006;GO:0006066;GO:0006073;GO:0006091;GO:0006112;GO:0007584;GO:0008152;GO:0009056;GO:0009057;GO:0009058;GO:0009059;GO:0009250;GO:0009251;GO:0009605;GO:0009719;GO:0009725;GO:0009987;GO:0009991;GO:0010033;GO:0015980;GO:0016051;GO:0016052;GO:0019318;GO:0031667;GO:0031960;GO:0033692;GO:0034637;GO:0034645;GO:…	GO:0001871;GO:0003824;GO:0004133;GO:0004134;GO:0004135;GO:0004553;GO:0004558;GO:0005488;GO:0015926;GO:0016740;GO:0016757;GO:0016758;GO:0016787;GO:0016798;GO:0030246;GO:0030247	GO:0005654;GO:0005737;GO:0005783;GO:0005829;GO:0016234;GO:0016529;GO:0032991;GO:0043033;GO:0043226;GO:0043227;GO:0043229;GO:0043231;GO:0043234;GO:0044422;GO:0044424;GO:0044428;GO:0044444;GO:0044446;GO:0044464	REACT_1008		45	45	45	37	37	37	174.76	0	165.92	2109800000	238	27.7446	27.7333	27.176	27.4978	25.9819	25.793	28.6929	27.7342	27.4744	27.175	26.3873	26.7551
	0.132465	0.417028		0.148703	0.384911	SPEB_HUMAN	SPEB_HUMANAgmatinase,mitochondrial	Q9BSE5	SPEB_HUMAN Agmatinase, mitochondrial	AGMAT	AGMAT	COG0010	3.5.3.11	agmatine biosynthetic process;amine biosynthetic process;amine metabolic process;biosynthetic process;cellular amine metabolic process;cellular biogenic amine biosynthetic process;cellular biogenic amine metabolic process;cellular biosynthetic process;cellular metabolic process;cellular nitrogen compound biosynthetic process;cellular nitrogen compound metabolic process;cellular process;metabolic …	agmatinase activity;binding;catalytic activity;cation binding;hydrolase activity;hydrolase activity, acting on carbon-nitrogen (but not peptide) bonds;hydrolase activity, acting on carbon-nitrogen (but not peptide) bonds, in linear amidines;ion binding;metal ion binding	cell part;cytoplasmic part;extracellular membrane-bounded organelle;extracellular organelle;extracellular region part;extracellular vesicular exosome;intracellular membrane-bounded organelle;intracellular organelle;intracellular part;membrane-bounded organelle;membrane-bounded vesicle;mitochondrion;organelle;vesicle	Arginine and proline metabolism	ACEVEDO_LIVER_CANCER_DN;ACEVEDO_LIVER_TUMOR_VS_NORMAL_ADJACENT_TISSUE_DN;ACEVEDO_NORMAL_TISSUE_ADJACENT_TO_LIVER_TUMOR_DN;BLALOCK_ALZHEIMERS_DISEASE_UP;BRUINS_UVC_RESPONSE_LATE;CACGTG_V$MYC_Q2;CHEN_METABOLIC_SYNDROM_NETWORK;chr1p36;FOSTER_KDM1A_TARGETS_UP;GSE11057_EFF_MEM_VS_CENT_MEM_CD4_TCELL_DN;GSE11057_NAIVE_CD4_VS_PBMC_CD4_TCELL_UP;GSE11057_NAIVE_VS_EFF_MEMORY_CD4_TCELL_UP;GSE13411_IGM_VS_SWI…	GO:0006576;GO:0006595;GO:0006596;GO:0006807;GO:0008152;GO:0008216;GO:0008295;GO:0009058;GO:0009308;GO:0009309;GO:0009445;GO:0009446;GO:0009987;GO:0033388;GO:0034641;GO:0042401;GO:0044106;GO:0044237;GO:0044249;GO:0044271;GO:0044281;GO:0097055	GO:0003824;GO:0005488;GO:0008783;GO:0016787;GO:0016810;GO:0016813;GO:0043167;GO:0043169;GO:0046872	GO:0005739;GO:0031982;GO:0031988;GO:0043226;GO:0043227;GO:0043229;GO:0043230;GO:0043231;GO:0044421;GO:0044424;GO:0044444;GO:0044464;GO:0065010;GO:0070062	REACT_14800		5	5	5	27.6	27.6	27.6	37.66	0	79.47	281460000	34	24.7674	24.26	24.163	24.7415	22.3765	22.1243	25.8031	26.1048	22.5336	24.4219	22.8566	23.1185
	1.32883	-0.57961		0.0747102	0.149441	AGO1_HUMAN;AGO4_HUMAN	AGO1_HUMANProteinargonaute-1	Q9UL18	AGO1_HUMAN Protein argonaute-1	AGO1	AGO1	NOG279895		biological regulation;biosynthetic process;catabolic process;cell surface receptor linked signaling pathway;cellular biosynthetic process;cellular catabolic process;cellular component assembly;cellular component assembly at cellular level;cellular component organization;cellular component organization at cellular level;cellular component organization or biogenesis;cellular component organization …	basal RNA polymerase II transcription machinery binding;basal transcription machinery binding;binding;core promoter binding;core promoter proximal region DNA binding;core promoter proximal region sequence-specific DNA binding;DNA binding;double-stranded RNA binding;enzyme binding;miRNA binding;nucleic acid binding;pre-miRNA binding;protein binding;regulatory region DNA binding;regulatory region n…	cell part;cytoplasm;cytoplasmic mRNA processing body;cytoplasmic part;cytosol;intracellular membrane-bounded organelle;intracellular non-membrane-bounded organelle;intracellular organelle;intracellular organelle part;intracellular part;macromolecular complex;membrane-bounded organelle;micro-ribonucleoprotein complex;non-membrane-bounded organelle;nuclear part;nucleoplasm;nucleus;organelle;organel…			GO:0000956;GO:0002376;GO:0006139;GO:0006351;GO:0006355;GO:0006357;GO:0006396;GO:0006401;GO:0006402;GO:0006417;GO:0006807;GO:0006950;GO:0006952;GO:0006955;GO:0007165;GO:0007166;GO:0007167;GO:0007169;GO:0007173;GO:0007219;GO:0008152;GO:0008543;GO:0009056;GO:0009057;GO:0009058;GO:0009059;GO:0009719;GO:0009889;GO:0009890;GO:0009891;GO:0009892;GO:0009893;GO:0009987;GO:0010033;GO:0010467;GO:0010468;GO:…	GO:0000975;GO:0000976;GO:0000977;GO:0000978;GO:0000987;GO:0000993;GO:0001012;GO:0001047;GO:0001067;GO:0001098;GO:0001099;GO:0001159;GO:0003676;GO:0003677;GO:0003723;GO:0003725;GO:0003727;GO:0005488;GO:0005515;GO:0019899;GO:0035198;GO:0043175;GO:0043565;GO:0044212;GO:0070063;GO:0070883	GO:0000932;GO:0005634;GO:0005654;GO:0005737;GO:0005829;GO:0005844;GO:0016442;GO:0030529;GO:0031332;GO:0032991;GO:0035068;GO:0035770;GO:0043226;GO:0043227;GO:0043228;GO:0043229;GO:0043231;GO:0043232;GO:0044422;GO:0044424;GO:0044428;GO:0044444;GO:0044446;GO:0044464;GO:0070578	REACT_118560;REACT_118568;REACT_118699;REACT_12417;REACT_169325;REACT_169436;REACT_263982;REACT_268530;REACT_75829	SM00949;SM00950	25	20	15	42	34.2	27.1	97.213	0	40.947	795080000	84	26.3743	26.5022	26.6029	26.4649	25.2043	24.5819	26.2326	25.9424	25.5655	26.1636	24.7265	25.8094
	0.093798	-0.108592		0.670484	0.917552	AGO2_HUMAN	AGO2_HUMANProteinargonaute-2	Q9UKV8	AGO2_HUMAN Protein argonaute-2	AGO2	AGO2	NOG279895	3.1.26.n2	biological regulation;biosynthetic process;cell surface receptor linked signaling pathway;cellular biosynthetic process;cellular component assembly;cellular component assembly at cellular level;cellular component organization;cellular component organization at cellular level;cellular component organization or biogenesis;cellular component organization or biogenesis at cellular level;cellular macr…	basal RNA polymerase II transcription machinery binding;basal transcription machinery binding;binding;catalytic activity;cation binding;core promoter binding;DNA binding;double-stranded RNA binding;endonuclease activity;endonuclease activity, active with either ribo- or deoxyribonucleic acids and producing 5'-phosphomonoesters;endoribonuclease activity;endoribonuclease activity, cleaving siRNA-pa…	cell part;cytoplasm;cytoplasmic mRNA processing body;cytoplasmic part;cytosol;intracellular membrane-bounded organelle;intracellular non-membrane-bounded organelle;intracellular organelle;intracellular organelle part;intracellular part;macromolecular complex;membrane;membrane-bounded organelle;micro-ribonucleoprotein complex;mRNA cap binding complex;non-membrane-bounded organelle;nuclear part;nuc…			GO:0002376;GO:0006139;GO:0006351;GO:0006355;GO:0006357;GO:0006379;GO:0006396;GO:0006397;GO:0006412;GO:0006413;GO:0006417;GO:0006446;GO:0006807;GO:0006950;GO:0006952;GO:0006955;GO:0007165;GO:0007166;GO:0007167;GO:0007169;GO:0007173;GO:0007219;GO:0008152;GO:0008543;GO:0009058;GO:0009059;GO:0009719;GO:0009791;GO:0009889;GO:0009890;GO:0009891;GO:0009892;GO:0009893;GO:0009894;GO:0009896;GO:0009987;GO:…	GO:0000339;GO:0000340;GO:0000975;GO:0000993;GO:0001047;GO:0001067;GO:0001098;GO:0001099;GO:0003676;GO:0003677;GO:0003723;GO:0003725;GO:0003727;GO:0003729;GO:0003743;GO:0003824;GO:0004518;GO:0004519;GO:0004521;GO:0004540;GO:0005488;GO:0005515;GO:0008135;GO:0016787;GO:0016788;GO:0016891;GO:0016893;GO:0019899;GO:0035197;GO:0035198;GO:0043167;GO:0043169;GO:0043175;GO:0044212;GO:0046872;GO:0070063;GO:…	GO:0000932;GO:0005634;GO:0005654;GO:0005737;GO:0005829;GO:0005844;GO:0005845;GO:0016020;GO:0016442;GO:0030529;GO:0031332;GO:0032991;GO:0034518;GO:0035068;GO:0035770;GO:0043226;GO:0043227;GO:0043228;GO:0043229;GO:0043231;GO:0043232;GO:0043234;GO:0044422;GO:0044424;GO:0044428;GO:0044444;GO:0044446;GO:0044464;GO:0070578	REACT_118560;REACT_118568;REACT_118699;REACT_12417;REACT_263982;REACT_268530;REACT_75829	SM00949;SM00950	27	27	21	46.4	46.4	36.7	97.207	0	118.85	1663100000	160	27.3419	26.9959	27.6962	27.1867	25.5557	25.3231	27.851	26.6024	27.2548	26.531	27.1245	27.1627
	0.591748	10.117		0.4305	-6.84249	AGO3_HUMAN	AGO3_HUMANProteinargonaute-3	Q9H9G7	AGO3_HUMAN Protein argonaute-3	AGO3	AGO3	NOG279895		biological regulation;catabolic process;cell surface receptor linked signaling pathway;cellular catabolic process;cellular component assembly;cellular component assembly at cellular level;cellular component organization;cellular component organization at cellular level;cellular component organization or biogenesis;cellular component organization or biogenesis at cellular level;cellular macromolec…	binding;double-stranded RNA binding;miRNA binding;nucleic acid binding;pre-miRNA binding;RNA binding;single-stranded RNA binding	cell part;cytoplasm;cytoplasmic mRNA processing body;cytoplasmic part;cytosol;intracellular non-membrane-bounded organelle;intracellular organelle;intracellular part;macromolecular complex;membrane;micro-ribonucleoprotein complex;non-membrane-bounded organelle;organelle;ribonucleoprotein complex;RISC-loading complex;RNA granule;RNAi effector complex;RNA-induced silencing complex			GO:0002376;GO:0006139;GO:0006396;GO:0006401;GO:0006402;GO:0006417;GO:0006807;GO:0006950;GO:0006952;GO:0006955;GO:0007165;GO:0007166;GO:0007167;GO:0007169;GO:0007173;GO:0007219;GO:0008152;GO:0008543;GO:0009056;GO:0009057;GO:0009719;GO:0009889;GO:0009890;GO:0009892;GO:0009987;GO:0010033;GO:0010467;GO:0010468;GO:0010501;GO:0010556;GO:0010558;GO:0010605;GO:0010608;GO:0010629;GO:0016043;GO:0016070;GO:…	GO:0003676;GO:0003723;GO:0003725;GO:0003727;GO:0005488;GO:0035198;GO:0070883	GO:0000932;GO:0005737;GO:0005829;GO:0016020;GO:0016442;GO:0030529;GO:0031332;GO:0032991;GO:0035068;GO:0035770;GO:0043226;GO:0043228;GO:0043229;GO:0043232;GO:0044424;GO:0044444;GO:0044464;GO:0070578	REACT_118560;REACT_118568;REACT_118699;REACT_12417;REACT_169325;REACT_169436;REACT_263982;REACT_75829	SM00949;SM00950	15	5	5	25.7	10	10	97.359	0	10.029	159850000	6	22.8805	22.9305	0.001	21.6005	19.8095	19.5092	24.8504	25.6748	25.6378	19.0008	21.3899	0.001
	0.0690412	2.07094	+	1.206	16.3501	PLCA_HUMAN	PLCA_HUMAN1-acyl-sn-glycerol-3-phosphateacyltransferasealpha	Q99943	PLCA_HUMAN 1-acyl-sn-glycerol-3-phosphate acyltransferase alpha	AGPAT1	AGPAT1	COG0204	2.3.1.51	acylglycerol biosynthetic process;acylglycerol metabolic process;biological regulation;biosynthetic process;carboxylic acid biosynthetic process;carboxylic acid metabolic process;CDP-diacylglycerol biosynthetic process;CDP-diacylglycerol metabolic process;cellular biosynthetic process;cellular ketone metabolic process;cellular lipid metabolic process;cellular metabolic process;cellular process;di…	1-acylglycerol-3-phosphate O-acyltransferase activity;acylglycerol O-acyltransferase activity;catalytic activity;O-acyltransferase activity;transferase activity;transferase activity, transferring acyl groups;transferase activity, transferring acyl groups other than amino-acyl groups	cell part;cytoplasmic part;endoplasmic reticulum;endoplasmic reticulum membrane;endoplasmic reticulum part;integral to membrane;intracellular membrane-bounded organelle;intracellular organelle;intracellular organelle part;intracellular part;intrinsic to membrane;membrane;membrane part;membrane-bounded organelle;organelle;organelle membrane;organelle part	Fat digestion and absorption;Glycerolipid metabolism;Glycerophospholipid metabolism	AGGGCCA,MIR-328;BIOSYNTHETIC_PROCESS;BUYTAERT_PHOTODYNAMIC_THERAPY_STRESS_DN;CARBOXYLIC_ACID_METABOLIC_PROCESS;CELLULAR_BIOSYNTHETIC_PROCESS;CELLULAR_LIPID_METABOLIC_PROCESS;chr6p21;CONCANNON_APOPTOSIS_BY_EPOXOMICIN_DN;CTTTAAR_UNKNOWN;CTTTGA_V$LEF1_Q2;CYTOPLASM;CYTOPLASMIC_PART;DELACROIX_RAR_BOUND_ES;DELACROIX_RARG_BOUND_MEF;DEURIG_T_CELL_PROLYMPHOCYTIC_LEUKEMIA_UP;DIAZ_CHRONIC_MEYLOGENOUS_LEUKEM…	GO:0001817;GO:0001819;GO:0001959;GO:0001961;GO:0006082;GO:0006091;GO:0006112;GO:0006629;GO:0006638;GO:0006639;GO:0006641;GO:0006644;GO:0006650;GO:0006651;GO:0006654;GO:0006662;GO:0008152;GO:0008610;GO:0008654;GO:0009058;GO:0009893;GO:0009966;GO:0009967;GO:0009987;GO:0010646;GO:0010647;GO:0015980;GO:0016024;GO:0016053;GO:0018904;GO:0019222;GO:0019432;GO:0019637;GO:0019752;GO:0023051;GO:0023056;GO:…	GO:0003824;GO:0003841;GO:0008374;GO:0016411;GO:0016740;GO:0016746;GO:0016747	GO:0005783;GO:0005789;GO:0016020;GO:0016021;GO:0031090;GO:0031224;GO:0043226;GO:0043227;GO:0043229;GO:0043231;GO:0044422;GO:0044424;GO:0044425;GO:0044432;GO:0044444;GO:0044446;GO:0044464	REACT_1190;REACT_120906;REACT_2122	SM00563	2	2	2	10.2	10.2	10.2	31.716	0.00042799	3.5416	54410000	5	20.5137	20.7448	0.001	19.0646	0.001	0.001	23.6778	0.001	23.7936	23.477	22.7638	21.876
+	8.38128	-23.9813	+	7.57566	-21.8564	PLCC_HUMAN	PLCC_HUMAN1-acyl-sn-glycerol-3-phosphateacyltransferasegamma	Q9NRZ7	PLCC_HUMAN 1-acyl-sn-glycerol-3-phosphate acyltransferase gamma	AGPAT3	AGPAT3	COG0204	2.3.1.51	acylglycerol biosynthetic process;acylglycerol metabolic process;biosynthetic process;carboxylic acid biosynthetic process;carboxylic acid metabolic process;CDP-diacylglycerol biosynthetic process;CDP-diacylglycerol metabolic process;cellular biosynthetic process;cellular ketone metabolic process;cellular lipid metabolic process;cellular metabolic process;cellular process;diacylglycerol biosynthe…	1-acylglycerol-3-phosphate O-acyltransferase activity;acylglycerol O-acyltransferase activity;catalytic activity;O-acyltransferase activity;transferase activity;transferase activity, transferring acyl groups;transferase activity, transferring acyl groups other than amino-acyl groups	cell part;cytoplasmic part;endoplasmic reticulum;endoplasmic reticulum membrane;endoplasmic reticulum part;envelope;integral to membrane;intracellular membrane-bounded organelle;intracellular organelle;intracellular organelle part;intracellular part;intrinsic to membrane;membrane;membrane part;membrane-bounded organelle;nuclear envelope;nuclear part;organelle;organelle envelope;organelle membrane…	Glycerolipid metabolism;Glycerophospholipid metabolism	BENPORATH_CYCLING_GENES;BERNARD_PPAPDC1B_TARGETS_UP;BURTON_ADIPOGENESIS_6;chr21q22;CHYLA_CBFA2T3_TARGETS_DN;CTTGTAT,MIR-381;CYTOPLASM;CYTOPLASMIC_PART;DELACROIX_RAR_BOUND_ES;DODD_NASOPHARYNGEAL_CARCINOMA_DN;DOUGLAS_BMI1_TARGETS_DN;ENDOPLASMIC_RETICULUM;FEVR_CTNNB1_TARGETS_UP;FORTSCHEGGER_PHF8_TARGETS_DN;GACAATC,MIR-219;GSE12845_IGD_NEG_BLOOD_VS_NAIVE_TONSIL_BCELL_DN;GSE13229_IMM_VS_MATURE_NKCELL_…	GO:0006082;GO:0006629;GO:0006638;GO:0006639;GO:0006641;GO:0006644;GO:0006650;GO:0006651;GO:0006654;GO:0006662;GO:0008152;GO:0008610;GO:0008654;GO:0009058;GO:0009987;GO:0016024;GO:0016053;GO:0018904;GO:0019432;GO:0019637;GO:0019752;GO:0042180;GO:0043436;GO:0044237;GO:0044238;GO:0044249;GO:0044255;GO:0044281;GO:0044283;GO:0045017;GO:0046339;GO:0046341;GO:0046394;GO:0046460;GO:0046463;GO:0046473;GO:…	GO:0003824;GO:0003841;GO:0008374;GO:0016411;GO:0016740;GO:0016746;GO:0016747	GO:0005635;GO:0005783;GO:0005789;GO:0005886;GO:0016020;GO:0016021;GO:0031090;GO:0031224;GO:0031967;GO:0031975;GO:0043226;GO:0043227;GO:0043229;GO:0043231;GO:0044422;GO:0044424;GO:0044425;GO:0044428;GO:0044432;GO:0044444;GO:0044446;GO:0044464	REACT_1190;REACT_120906	SM00563	4	4	4	13	13	13	43.38	0	4.9711	61650000	12	24.0205	24.1737	23.7527	21.8458	21.5545	22.1719	0.001	0.001	0.001	0.001	0.001	0.001
	1.5897	0.990895		0.924451	-2.3535	PLCE_HUMAN	PLCE_HUMAN1-acyl-sn-glycerol-3-phosphateacyltransferaseepsilon	Q9NUQ2	PLCE_HUMAN 1-acyl-sn-glycerol-3-phosphate acyltransferase epsilon	AGPAT5	AGPAT5	COG0204	2.3.1.51	acylglycerol biosynthetic process;acylglycerol metabolic process;biosynthetic process;carboxylic acid biosynthetic process;carboxylic acid metabolic process;CDP-diacylglycerol biosynthetic process;CDP-diacylglycerol metabolic process;cell differentiation;cellular biosynthetic process;cellular developmental process;cellular ketone metabolic process;cellular lipid metabolic process;cellular metabol…	1-acylglycerol-3-phosphate O-acyltransferase activity;acylglycerol O-acyltransferase activity;catalytic activity;O-acyltransferase activity;transferase activity;transferase activity, transferring acyl groups;transferase activity, transferring acyl groups other than amino-acyl groups	cell part;cytoplasmic part;endoplasmic reticulum membrane;endoplasmic reticulum part;envelope;integral to membrane;intracellular membrane-bounded organelle;intracellular organelle;intracellular organelle part;intracellular part;intrinsic to membrane;membrane;membrane part;membrane-bounded organelle;mitochondrial membrane;mitochondrial outer membrane;mitochondrial part;mitochondrion;nuclear envelo…		AKT_UP_MTOR_DN.V1_DN;BAKKER_FOXO3_TARGETS_DN;BILBAN_B_CLL_LPL_UP;BILD_MYC_ONCOGENIC_SIGNATURE;BOYLAN_MULTIPLE_MYELOMA_C_D_UP;BRUINS_UVC_RESPONSE_LATE;CAIRO_HEPATOBLASTOMA_CLASSES_UP;chr8p23;CYTOPLASM;CYTOPLASMIC_PART;DELASERNA_MYOD_TARGETS_UP;DOUGLAS_BMI1_TARGETS_UP;GCM_ERBB2IP;GCM_RAB10;GEORGES_TARGETS_OF_MIR192_AND_MIR215;GRAESSMANN_APOPTOSIS_BY_DOXORUBICIN_UP;GRAESSMANN_RESPONSE_TO_MC_AND_DOXO…	GO:0002244;GO:0006082;GO:0006629;GO:0006638;GO:0006639;GO:0006641;GO:0006644;GO:0006650;GO:0006651;GO:0006654;GO:0006662;GO:0008152;GO:0008610;GO:0008654;GO:0009058;GO:0009987;GO:0016024;GO:0016053;GO:0018904;GO:0019432;GO:0019637;GO:0019752;GO:0030154;GO:0032502;GO:0042180;GO:0043436;GO:0044237;GO:0044238;GO:0044249;GO:0044255;GO:0044281;GO:0044283;GO:0045017;GO:0046339;GO:0046341;GO:0046394;GO:…	GO:0003824;GO:0003841;GO:0008374;GO:0016411;GO:0016740;GO:0016746;GO:0016747	GO:0005635;GO:0005739;GO:0005741;GO:0005789;GO:0016020;GO:0016021;GO:0019867;GO:0031090;GO:0031224;GO:0031966;GO:0031967;GO:0031968;GO:0031975;GO:0043226;GO:0043227;GO:0043229;GO:0043231;GO:0044422;GO:0044424;GO:0044425;GO:0044428;GO:0044429;GO:0044432;GO:0044444;GO:0044446;GO:0044464	REACT_1190;REACT_120906	SM00563	7	7	7	21.7	21.7	21.7	42.072	0	20.992	279440000	20	24.7307	23.971	24.6253	25.6042	22.525	22.5708	25.5737	25.1154	25.6105	21.7081	19.9926	21.9388
	3.91495	3.48332	+	2.89731	4.22467	ADAS_HUMAN	ADAS_HUMANAlkyldihydroxyacetonephosphatesynthase,peroxisomal	O00116	ADAS_HUMAN Alkyldihydroxyacetonephosphate synthase, peroxisomal	AGPS	AGPS	COG0277	2.5.1.26	biosynthetic process;cellular biosynthetic process;cellular lipid metabolic process;cellular metabolic process;cellular process;ether lipid biosynthetic process;ether lipid metabolic process;glycerol ether biosynthetic process;glycerol ether metabolic process;glycerolipid biosynthetic process;glycerolipid metabolic process;lipid biosynthetic process;lipid metabolic process;metabolic process;organ…	alkylglycerone-phosphate synthase activity;binding;catalytic activity;coenzyme binding;cofactor binding;FAD binding;flavin adenine dinucleotide binding;oxidoreductase activity;oxidoreductase activity, acting on CH-OH group of donors;oxidoreductase activity, acting on the CH-OH group of donors, NAD or NADP as acceptor;transferase activity;transferase activity, transferring alkyl or aryl (other tha…	cell part;cytoplasmic part;intracellular membrane-bounded organelle;intracellular non-membrane-bounded organelle;intracellular organelle;intracellular organelle lumen;intracellular organelle part;intracellular part;membrane;membrane-bounded organelle;membrane-enclosed lumen;microbody;microbody lumen;microbody membrane;microbody part;mitochondrion;non-membrane-bounded organelle;nuclear part;nucleo…	Ether lipid metabolism;Peroxisome	BECKER_TAMOXIFEN_RESISTANCE_DN;BENPORATH_MYC_MAX_TARGETS;BIOSYNTHETIC_PROCESS;CAGGTA_V$AREB6_01;CAIRO_HEPATOBLASTOMA_CLASSES_UP;CELLULAR_LIPID_METABOLIC_PROCESS;CHARAFE_BREAST_CANCER_LUMINAL_VS_BASAL_DN;CHARAFE_BREAST_CANCER_LUMINAL_VS_MESENCHYMAL_DN;CHIARETTI_ACUTE_LYMPHOBLASTIC_LEUKEMIA_ZAP70;chr2q;CYTOPLASM;CYTOPLASMIC_PART;DANG_BOUND_BY_MYC;DIAZ_CHRONIC_MEYLOGENOUS_LEUKEMIA_UP;DURCHDEWALD_SKI…	GO:0006629;GO:0006662;GO:0008152;GO:0008610;GO:0008611;GO:0009058;GO:0009987;GO:0018904;GO:0044237;GO:0044238;GO:0044249;GO:0044255;GO:0044281;GO:0045017;GO:0046485;GO:0046486;GO:0046504	GO:0003824;GO:0005488;GO:0008609;GO:0008762;GO:0016491;GO:0016614;GO:0016616;GO:0016740;GO:0016765;GO:0048037;GO:0050660;GO:0050662;GO:0071949	GO:0005730;GO:0005739;GO:0005777;GO:0005778;GO:0005782;GO:0016020;GO:0031090;GO:0031903;GO:0031907;GO:0031974;GO:0042579;GO:0043226;GO:0043227;GO:0043228;GO:0043229;GO:0043231;GO:0043232;GO:0043233;GO:0044422;GO:0044424;GO:0044428;GO:0044438;GO:0044439;GO:0044444;GO:0044446;GO:0044464;GO:0070013	REACT_1407		14	14	14	30.4	30.4	30.4	72.911	0	62.802	903110000	72	24.3772	23.686	23.9735	22.4749	21.96	21.6284	27.335	27.4131	27.7386	27.1641	25.8406	25.7325
	0.244295	-6.06912		0	0	CBPC1_HUMAN	CBPC1_HUMANCytosoliccarboxypeptidase1	Q9UPW5	CBPC1_HUMAN Cytosolic carboxypeptidase 1	AGTPBP1	AGTPBP1	COG2866	3.4.17.-	anatomical structure development;cell differentiation;cell differentiation in hindbrain;cellular component organization;cellular component organization at cellular level;cellular component organization or biogenesis;cellular component organization or biogenesis at cellular level;cellular developmental process;cellular macromolecule metabolic process;cellular metabolic process;cellular process;cel…	binding;carboxypeptidase activity;catalytic activity;cation binding;cytoskeletal protein binding;exopeptidase activity;hydrolase activity;ion binding;metal ion binding;metallocarboxypeptidase activity;metalloexopeptidase activity;metallopeptidase activity;peptidase activity;peptidase activity, acting on L-amino acid peptides;protein binding;transition metal ion binding;tubulin binding;zinc ion bi…	cell part;cytoplasm;cytoplasmic part;cytosol;intracellular membrane-bounded organelle;intracellular organelle;intracellular part;membrane-bounded organelle;mitochondrion;nucleus;organelle		ALCALAY_AML_BY_NPM1_LOCALIZATION_DN;BOYLAN_MULTIPLE_MYELOMA_D_UP;BROWNE_HCMV_INFECTION_1HR_UP;BROWNE_HCMV_INFECTION_20HR_UP;BROWNE_HCMV_INFECTION_4HR_UP;CASORELLI_ACUTE_PROMYELOCYTIC_LEUKEMIA_UP;CHEN_HOXA5_TARGETS_9HR_UP;chr9q21;CONCANNON_APOPTOSIS_BY_EPOXOMICIN_UP;DAVICIONI_MOLECULAR_ARMS_VS_ERMS_UP;DELACROIX_RAR_BOUND_ES;GRAESSMANN_APOPTOSIS_BY_DOXORUBICIN_UP;GRAESSMANN_RESPONSE_TO_MC_AND_DOXOR…	GO:0001754;GO:0003008;GO:0006464;GO:0006996;GO:0007005;GO:0008152;GO:0009987;GO:0016043;GO:0018193;GO:0018200;GO:0018410;GO:0019538;GO:0021533;GO:0021702;GO:0021772;GO:0021953;GO:0030154;GO:0030182;GO:0032501;GO:0032502;GO:0035608;GO:0035609;GO:0035610;GO:0043170;GO:0043412;GO:0043687;GO:0044237;GO:0044238;GO:0044260;GO:0044267;GO:0046530;GO:0048856;GO:0048869;GO:0050877;GO:0050905;GO:0071840;GO:…	GO:0003824;GO:0004180;GO:0004181;GO:0005488;GO:0005515;GO:0008092;GO:0008233;GO:0008235;GO:0008237;GO:0008238;GO:0008270;GO:0015631;GO:0016787;GO:0043167;GO:0043169;GO:0046872;GO:0046914;GO:0070011	GO:0005634;GO:0005737;GO:0005739;GO:0005829;GO:0043226;GO:0043227;GO:0043229;GO:0043231;GO:0044424;GO:0044444;GO:0044464			2	2	2	1.7	1.7	1.7	138.45	0.005096	2.1002	5335900	1	19.9794	19.8949	0.001	0.001	0.001	0.001	21.6659	0.001	0.001	0.001	0.001	0.001
	0.935069	-14.3336		0.934916	-13.3867	ATRAP_HUMAN	ATRAP_HUMANType-1angiotensinIIreceptor-associatedprotein	Q6RW13	ATRAP_HUMAN Type-1 angiotensin II receptor-associated protein	AGTRAP	AGTRAP	NOG45277		biological regulation;regulation of biological quality;regulation of blood pressure;response to chemical stimulus;response to hypoxia;response to oxygen levels;response to stimulus;response to stress	angiotensin receptor activity;angiotensin type II receptor activity;binding;G-protein coupled receptor activity;molecular transducer activity;peptide binding;peptide receptor activity;peptide receptor activity, G-protein coupled;receptor activity;signal transducer activity;signaling receptor activity;transmembrane signaling receptor activity	cell cortex;cell part;cytoplasm;cytoplasmic part;cytoplasmic vesicle membrane;cytoplasmic vesicle part;endoplasmic reticulum membrane;endoplasmic reticulum part;Golgi apparatus part;Golgi membrane;integral to membrane;intracellular membrane-bounded organelle;intracellular organelle;intracellular organelle part;intracellular part;intrinsic to membrane;membrane;membrane part;membrane-bounded organe…		BRUINS_UVC_RESPONSE_VIA_TP53_GROUP_A;BYSTRYKH_HEMATOPOIESIS_STEM_CELL_AND_BRAIN_QTL_CIS;BYSTRYKH_HEMATOPOIESIS_STEM_CELL_QTL_CIS;chr1p36;DELACROIX_RAR_BOUND_ES;FOSTER_TOLERANT_MACROPHAGE_UP;FULCHER_INFLAMMATORY_RESPONSE_LECTIN_VS_LPS_UP;GCNP_SHH_UP_LATE.V1_DN;GOTTWEIN_TARGETS_OF_KSHV_MIR_K12_11;GSE13306_TREG_VS_TCONV_SPLEEN_DN;GSE14308_TH17_VS_NATURAL_TREG_UP;GSE14769_20MIN_VS_360MIN_LPS_BMDM_DN;…	GO:0001666;GO:0006950;GO:0008217;GO:0042221;GO:0050896;GO:0065007;GO:0065008;GO:0070482	GO:0001595;GO:0001653;GO:0004871;GO:0004872;GO:0004888;GO:0004930;GO:0004945;GO:0005488;GO:0008528;GO:0038023;GO:0042277;GO:0060089	GO:0000139;GO:0005654;GO:0005737;GO:0005789;GO:0005886;GO:0005938;GO:0012506;GO:0016020;GO:0016021;GO:0030659;GO:0031090;GO:0031224;GO:0043226;GO:0043227;GO:0043229;GO:0043231;GO:0044422;GO:0044424;GO:0044425;GO:0044428;GO:0044431;GO:0044432;GO:0044433;GO:0044444;GO:0044446;GO:0044464		SM00805	1	1	1	13.8	13.8	13.8	17.419	0.00083333	3.0103	8199900	3	21.3939	21.609	0.001	0.001	19.8538	20.3082	0.001	0.001	0.001	0.001	0.001	0.001
	2.63263	2.34651		0.102595	0.236418	ELYS_HUMAN	ELYS_HUMANProteinELYS	Q8WYP5	ELYS_HUMAN Protein ELYS	AHCTF1	AHCTF1	NOG70776		biological regulation;cell cycle;cellular component assembly;cellular component assembly at cellular level;cellular component organization;cellular component organization at cellular level;cellular component organization or biogenesis;cellular component organization or biogenesis at cellular level;cellular macromolecular complex assembly;cellular macromolecular complex subunit organization;cellul…	binding;DNA binding;nucleic acid binding;nucleic acid binding transcription factor activity;sequence-specific DNA binding transcription factor activity	cell part;chromosomal part;condensed chromosome kinetochore;cytoplasmic part;cytosol;extracellular membrane-bounded organelle;extracellular organelle;extracellular region part;extracellular vesicular exosome;intracellular membrane-bounded organelle;intracellular non-membrane-bounded organelle;intracellular organelle;intracellular organelle part;intracellular part;kinetochore;macromolecular comple…		ACEVEDO_LIVER_CANCER_UP;ACEVEDO_NORMAL_TISSUE_ADJACENT_TO_LIVER_TUMOR_UP;ACTAYRNNNCCCR_UNKNOWN;BHAT_ESR1_TARGETS_NOT_VIA_AKT1_UP;BLALOCK_ALZHEIMERS_DISEASE_UP;BROWNE_HCMV_INFECTION_12HR_UP;BROWNE_HCMV_INFECTION_20HR_UP;CACTTTG,MIR-520G,MIR-520H;CAGGTA_V$AREB6_01;CCAGGTT,MIR-490;chr1q44;CTACCTC,LET-7A,LET-7B,LET-7C,LET-7D,LET-7E,LET-7F,MIR-98,LET-7G,LET-7I;DACOSTA_UV_RESPONSE_VIA_ERCC3_DN;DELACROI…	GO:0000278;GO:0000910;GO:0006461;GO:0006810;GO:0006996;GO:0006997;GO:0006999;GO:0007049;GO:0007165;GO:0007264;GO:0009987;GO:0015031;GO:0015931;GO:0016043;GO:0022607;GO:0034621;GO:0034622;GO:0035556;GO:0043623;GO:0043933;GO:0045184;GO:0046931;GO:0050657;GO:0050658;GO:0050789;GO:0050794;GO:0050896;GO:0051028;GO:0051234;GO:0051236;GO:0051292;GO:0051716;GO:0065003;GO:0065007;GO:0071822;GO:0071840;GO:…	GO:0001071;GO:0003676;GO:0003677;GO:0003700;GO:0005488	GO:0000776;GO:0000777;GO:0005634;GO:0005643;GO:0005654;GO:0005829;GO:0016020;GO:0016363;GO:0031090;GO:0031965;GO:0031982;GO:0031988;GO:0032991;GO:0043226;GO:0043227;GO:0043228;GO:0043229;GO:0043230;GO:0043231;GO:0043232;GO:0043234;GO:0044421;GO:0044422;GO:0044424;GO:0044425;GO:0044427;GO:0044428;GO:0044444;GO:0044446;GO:0044464;GO:0046930;GO:0065010;GO:0070062	REACT_150425;REACT_150471;REACT_355252;REACT_682	SM00384	25	25	25	18	18	18	252.5	0	84.141	714170000	90	25.1464	24.6497	24.752	25.3132	23.4228	23.6272	27.2645	26.6362	27.6868	25.3408	23.3569	24.3748
	2.25385	0.841429		0.463488	0.611617	SAHH_HUMAN	SAHH_HUMANAdenosylhomocysteinase	P23526	SAHH_HUMAN Adenosylhomocysteinase	AHCY	AHCY	COG0499	3.3.1.1	amine metabolic process;carboxylic acid metabolic process;cellular amine metabolic process;cellular amino acid metabolic process;cellular ketone metabolic process;cellular metabolic process;cellular modified amino acid metabolic process;cellular nitrogen compound metabolic process;cellular process;coenzyme metabolic process;cofactor metabolic process;heterocycle metabolic process;metabolic proces…	adenosylhomocysteinase activity;catalytic activity;hydrolase activity;hydrolase activity, acting on ether bonds;trialkylsulfonium hydrolase activity	cell part;cytoplasm;cytoplasmic membrane-bounded vesicle;cytoplasmic part;cytoplasmic vesicle;cytosol;extracellular membrane-bounded organelle;extracellular organelle;extracellular region part;extracellular vesicular exosome;intracellular membrane-bounded organelle;intracellular organelle;intracellular part;melanosome;membrane-bounded organelle;membrane-bounded vesicle;organelle;pigment granule;v…	Cysteine and methionine metabolism	ACEVEDO_LIVER_TUMOR_VS_NORMAL_ADJACENT_TISSUE_UP;ACEVEDO_NORMAL_TISSUE_ADJACENT_TO_LIVER_TUMOR_DN;ATACTGT,MIR-144;BERENJENO_TRANSFORMED_BY_RHOA_UP;BILANGES_RAPAMYCIN_SENSITIVE_VIA_TSC1_AND_TSC2;BILANGES_SERUM_SENSITIVE_GENES;BOCHKIS_FOXA2_TARGETS;BORCZUK_MALIGNANT_MESOTHELIOMA_UP;BROWN_MYELOID_CELL_DEVELOPMENT_DN;BYSTRYKH_HEMATOPOIESIS_STEM_CELL_AND_BRAIN_QTL_TRANS;BYSTRYKH_HEMATOPOIESIS_STEM_CEL…	GO:0000096;GO:0006082;GO:0006139;GO:0006520;GO:0006575;GO:0006730;GO:0006732;GO:0006790;GO:0006805;GO:0006807;GO:0008152;GO:0009116;GO:0009119;GO:0009308;GO:0009987;GO:0019752;GO:0032259;GO:0033353;GO:0034641;GO:0042180;GO:0042278;GO:0043436;GO:0044106;GO:0044237;GO:0044238;GO:0044281;GO:0046128;GO:0046483;GO:0046500;GO:0051186;GO:0055086;GO:0072521	GO:0003824;GO:0004013;GO:0016787;GO:0016801;GO:0016802	GO:0005737;GO:0005829;GO:0016023;GO:0031410;GO:0031982;GO:0031988;GO:0042470;GO:0043226;GO:0043227;GO:0043229;GO:0043230;GO:0043231;GO:0044421;GO:0044424;GO:0044444;GO:0044464;GO:0048770;GO:0065010;GO:0070062	REACT_115639;REACT_268587;REACT_6946	SM00996;SM00997	21	21	21	43.8	43.8	43.8	47.716	0	208.45	12020000000	645	29.8093	29.8865	29.9854	29.8487	28.3238	28.0044	30.9371	30.4508	30.8176	29.4141	29.2884	29.3092
	0.417796	0.164159		0.237565	-0.272957	SAHH2_HUMAN	SAHH2_HUMANS-adenosylhomocysteinehydrolase-likeprotein1	O43865	SAHH2_HUMAN S-adenosylhomocysteine hydrolase-like protein 1	AHCYL1	AHCYL1	COG0499	3.3.1.1	amine metabolic process;biological regulation;carboxylic acid metabolic process;cellular amine metabolic process;cellular amino acid metabolic process;cellular ketone metabolic process;cellular macromolecule metabolic process;cellular metabolic process;cellular modified amino acid metabolic process;cellular nitrogen compound metabolic process;cellular process;coenzyme metabolic process;cofactor m…	catalytic activity;hydrolase activity	cell part;cytoplasmic part;cytosol;endoplasmic reticulum;extracellular membrane-bounded organelle;extracellular organelle;extracellular region part;extracellular vesicular exosome;intracellular membrane-bounded organelle;intracellular organelle;intracellular part;membrane-bounded organelle;membrane-bounded vesicle;organelle;vesicle	Cysteine and methionine metabolism	ATTCTTT,MIR-186;BENPORATH_MYC_MAX_TARGETS;BRUINS_UVC_RESPONSE_LATE;CAGGTG_V$E12_Q6;CAMP_UP.V1_UP;CCACACA,MIR-147;chr1p13;CTTTGA_V$LEF1_Q2;CTTTGT_V$LEF1_Q2;DANG_BOUND_BY_MYC;DIAZ_CHRONIC_MEYLOGENOUS_LEUKEMIA_UP;DORSAM_HOXA9_TARGETS_UP;FEVR_CTNNB1_TARGETS_DN;FLECHNER_BIOPSY_KIDNEY_TRANSPLANT_OK_VS_DONOR_UP;FLECHNER_BIOPSY_KIDNEY_TRANSPLANT_REJECTED_VS_OK_DN;FULCHER_INFLAMMATORY_RESPONSE_LECTIN_VS_L…	GO:0002028;GO:0006082;GO:0006139;GO:0006378;GO:0006396;GO:0006397;GO:0006520;GO:0006575;GO:0006605;GO:0006611;GO:0006730;GO:0006732;GO:0006790;GO:0006807;GO:0006810;GO:0006886;GO:0006913;GO:0008152;GO:0009116;GO:0009119;GO:0009308;GO:0009987;GO:0010035;GO:0010038;GO:0010468;GO:0010765;GO:0010959;GO:0015031;GO:0016070;GO:0016071;GO:0019219;GO:0019222;GO:0019752;GO:0022898;GO:0031123;GO:0031124;GO:…	GO:0003824;GO:0016787	GO:0005783;GO:0005829;GO:0031982;GO:0031988;GO:0043226;GO:0043227;GO:0043229;GO:0043230;GO:0043231;GO:0044421;GO:0044424;GO:0044444;GO:0044464;GO:0065010;GO:0070062	REACT_111064;REACT_118700;REACT_15426;REACT_160158;REACT_163834;REACT_18325;REACT_188329;REACT_264273	SM00996;SM00997	16	16	8	39.6	39.6	24.5	58.951	0	97.856	1575800000	134	27.7045	27.2267	27.1954	27.0164	25.8826	25.8401	27.5312	27.4935	27.5945	25.5816	26.4001	25.9385
	1.35973	1.70713		0.919571	-14.7803	SAHH3_HUMAN	SAHH3_HUMANAdenosylhomocysteinase3	Q96HN2	SAHH3_HUMAN Adenosylhomocysteinase 3	AHCYL2	AHCYL2	COG0499	3.3.1.1	amine metabolic process;carboxylic acid metabolic process;cellular amine metabolic process;cellular amino acid metabolic process;cellular ketone metabolic process;cellular metabolic process;cellular modified amino acid metabolic process;cellular nitrogen compound metabolic process;cellular process;coenzyme metabolic process;cofactor metabolic process;heterocycle metabolic process;metabolic proces…	catalytic activity;hydrolase activity	cell part;cytoplasmic part;cytosol;intracellular part	Cysteine and methionine metabolism	ACEVEDO_LIVER_CANCER_WITH_H3K9ME3_DN;ACTGAAA,MIR-30A-3P,MIR-30E-3P;ACTGCCT,MIR-34B;ACTWSNACTNY_UNKNOWN;ASTON_MAJOR_DEPRESSIVE_DISORDER_UP;BREDEMEYER_RAG_SIGNALING_NOT_VIA_ATM_UP;CACCAGC,MIR-138;CACTGCC,MIR-34A,MIR-34C,MIR-449;CCCAGAG,MIR-326;chr7q32;CHYLA_CBFA2T3_TARGETS_DN;CTTTAAR_UNKNOWN;DURCHDEWALD_SKIN_CARCINOGENESIS_DN;FRASOR_RESPONSE_TO_SERM_OR_FULVESTRANT_UP;GAVIN_FOXP3_TARGETS_CLUSTER_P7;…	GO:0006082;GO:0006139;GO:0006520;GO:0006575;GO:0006730;GO:0006732;GO:0006790;GO:0006807;GO:0008152;GO:0009116;GO:0009119;GO:0009308;GO:0009987;GO:0019752;GO:0033353;GO:0034641;GO:0042180;GO:0042278;GO:0043436;GO:0044106;GO:0044237;GO:0044238;GO:0044281;GO:0046128;GO:0046483;GO:0046500;GO:0051186;GO:0055086;GO:0072521	GO:0003824;GO:0016787	GO:0005829;GO:0044424;GO:0044444;GO:0044464		SM00996;SM00997	14	6	6	33.1	20	20	66.72	0	41.366	168440000	17	23.2322	23.2241	23.0468	24.2453	21.423	20.9892	26.0405	24.2426	24.3414	22.3145	0.001	0.001
	2.10164	-0.555016		0.38681	-0.593061	AHNK_HUMAN	AHNK_HUMANNeuroblastdifferentiation-associatedproteinAHNAK	Q09666	AHNK_HUMAN Neuroblast differentiation-associated protein AHNAK	AHNAK	AHNAK	NOG12793		biological regulation;cellular component assembly;cellular component organization;cellular component organization or biogenesis;macromolecular complex assembly;macromolecular complex subunit organization;protein complex assembly;protein complex subunit organization;protein oligomerization;regulation of biological process;regulation of cellular metabolic process;regulation of cellular process;regu…		actin cytoskeleton;adherens junction;anchoring junction;cell junction;cell part;cell-cell contact zone;cell-cell junction;cell-substrate adherens junction;cell-substrate junction;contractile fiber part;costamere;cytoplasm;cytoplasmic part;cytoskeleton;cytosol;extracellular membrane-bounded organelle;extracellular organelle;extracellular region part;extracellular vesicular exosome;focal adhesion;i…		ABBUD_LIF_SIGNALING_1_DN;BASSO_B_LYMPHOCYTE_NETWORK;BERTUCCI_MEDULLARY_VS_DUCTAL_BREAST_CANCER_DN;BILD_MYC_ONCOGENIC_SIGNATURE;BOYAULT_LIVER_CANCER_SUBCLASS_G1_UP;BOYLAN_MULTIPLE_MYELOMA_D_DN;BRUINS_UVC_RESPONSE_EARLY_LATE;BRUINS_UVC_RESPONSE_LATE;BRUINS_UVC_RESPONSE_VIA_TP53_GROUP_B;CAMPS_COLON_CANCER_COPY_NUMBER_DN;CHIARETTI_T_ALL_RELAPSE_PROGNOSIS;CHICAS_RB1_TARGETS_CONFLUENT;chr11q12;CROONQUI…	GO:0006461;GO:0010468;GO:0016043;GO:0019219;GO:0019222;GO:0022607;GO:0031323;GO:0043484;GO:0043933;GO:0050789;GO:0050794;GO:0051171;GO:0051252;GO:0051259;GO:0060255;GO:0065003;GO:0065007;GO:0071822;GO:0071840;GO:0080090		GO:0005634;GO:0005737;GO:0005765;GO:0005774;GO:0005829;GO:0005856;GO:0005886;GO:0005911;GO:0005912;GO:0005924;GO:0005925;GO:0015629;GO:0016020;GO:0030054;GO:0030055;GO:0030315;GO:0031090;GO:0031982;GO:0031988;GO:0042383;GO:0043034;GO:0043226;GO:0043227;GO:0043228;GO:0043229;GO:0043230;GO:0043231;GO:0043232;GO:0044291;GO:0044421;GO:0044422;GO:0044424;GO:0044425;GO:0044437;GO:0044444;GO:0044446;GO:…		SM00228	328	328	328	76.4	76.4	76.4	629.09	0	323.31	113620000000	5002	33.9781	34.0165	33.9342	33.3005	31.8567	31.5426	33.2028	33.5046	33.5563	32.1154	30.9523	31.853
	2.90923	3.17866		2.39334	2.54486	AHSA1_HUMAN	AHSA1_HUMANActivatorof90kDaheatshockproteinATPasehomolog1	O95433	AHSA1_HUMAN Activator of 90 kDa heat shock protein ATPase homolog 1	AHSA1	AHSA1	COG5580		biological regulation;positive regulation of ATPase activity;positive regulation of catalytic activity;positive regulation of hydrolase activity;positive regulation of molecular function;regulation of ATPase activity;regulation of biological process;regulation of catabolic process;regulation of catalytic activity;regulation of cellular catabolic process;regulation of cellular metabolic process;re…	ATPase activator activity;ATPase regulator activity;binding;chaperone binding;enzyme activator activity;enzyme regulator activity;nucleoside-triphosphatase regulator activity;protein binding	cell part;cytoplasm;cytoplasmic part;cytosol;endoplasmic reticulum;extracellular membrane-bounded organelle;extracellular organelle;extracellular region part;extracellular vesicular exosome;intracellular membrane-bounded organelle;intracellular organelle;intracellular part;membrane-bounded organelle;membrane-bounded vesicle;organelle;vesicle		AMUNDSON_RESPONSE_TO_ARSENITE;APPIERTO_RESPONSE_TO_FENRETINIDE_UP;BASAKI_YBX1_TARGETS_UP;BASSO_B_LYMPHOCYTE_NETWORK;BENPORATH_NANOG_TARGETS;BLALOCK_ALZHEIMERS_DISEASE_DN;BLALOCK_ALZHEIMERS_DISEASE_INCIPIENT_DN;BUYTAERT_PHOTODYNAMIC_THERAPY_STRESS_UP;CELLULAR_MACROMOLECULE_METABOLIC_PROCESS;CELLULAR_PROTEIN_METABOLIC_PROCESS;CHAPERONE_BINDING;CHAUHAN_RESPONSE_TO_METHOXYESTRADIOL_UP;chr14q;CSR_LATE…	GO:0006140;GO:0006950;GO:0009894;GO:0019219;GO:0019222;GO:0030811;GO:0031323;GO:0031329;GO:0032781;GO:0033121;GO:0043085;GO:0043462;GO:0044093;GO:0050789;GO:0050790;GO:0050794;GO:0050896;GO:0051171;GO:0051336;GO:0051345;GO:0065007;GO:0065009;GO:0080090	GO:0001671;GO:0005488;GO:0005515;GO:0008047;GO:0030234;GO:0051087;GO:0060589;GO:0060590	GO:0005737;GO:0005783;GO:0005829;GO:0031982;GO:0031988;GO:0043226;GO:0043227;GO:0043229;GO:0043230;GO:0043231;GO:0044421;GO:0044424;GO:0044444;GO:0044464;GO:0065010;GO:0070062		SM01000	19	19	19	55.6	55.6	55.6	38.274	0	149.77	7827900000	278	27.1659	27.6087	27.2157	27.4215	26.5583	26.3384	31.0816	29.8335	30.6111	29.8602	28.9897	29.1029
	0	0	+	8.37739	24.289	FETUA_HUMAN	FETUA_HUMANAlpha-2-HS-glycoprotein	P02765	FETUA_HUMAN Alpha-2-HS-glycoprotein	AHSG	AHSG	NOG44208		acute inflammatory response;acute-phase response;anatomical structure development;biological regulation;cellular component organization;cellular component organization or biogenesis;cellular membrane organization;cellular process;defense response;developmental process;endocytosis;establishment of localization;inflammatory response;membrane invagination;membrane organization;multicellular organism…	cysteine-type endopeptidase inhibitor activity;endopeptidase inhibitor activity;endopeptidase regulator activity;enzyme inhibitor activity;enzyme regulator activity;kinase inhibitor activity;kinase regulator activity;peptidase inhibitor activity;peptidase regulator activity	blood microparticle;extracellular membrane-bounded organelle;extracellular organelle;extracellular region;extracellular region part;extracellular space;extracellular vesicular exosome;membrane-bounded organelle;membrane-bounded vesicle;organelle;vesicle		ABBUD_LIF_SIGNALING_1_UP;ACUTE_INFLAMMATORY_RESPONSE;ANATOMICAL_STRUCTURE_DEVELOPMENT;BOCHKIS_FOXA2_TARGETS;BONE_REMODELING;BRUINS_UVC_RESPONSE_VIA_TP53_GROUP_A;CAIRO_LIVER_DEVELOPMENT_DN;CAR_IGFBP1;chr3q27;DANG_BOUND_BY_MYC;DEFENSE_RESPONSE;ESTABLISHMENT_OF_LOCALIZATION;FERNANDEZ_BOUND_BY_MYC;GNF2_HPN;GNF2_HPX;GNF2_LCAT;GNF2_TST;GSE12845_IGD_NEG_BLOOD_VS_PRE_GC_TONSIL_BCELL_UP;GSE12845_IGD_POS_B…	GO:0001501;GO:0001503;GO:0002526;GO:0006810;GO:0006897;GO:0006907;GO:0006950;GO:0006952;GO:0006953;GO:0006954;GO:0009611;GO:0009892;GO:0009966;GO:0009968;GO:0009987;GO:0010324;GO:0010563;GO:0010646;GO:0010648;GO:0016043;GO:0016044;GO:0016192;GO:0019220;GO:0019222;GO:0023051;GO:0023057;GO:0030100;GO:0030278;GO:0030279;GO:0030500;GO:0030502;GO:0031323;GO:0031324;GO:0031347;GO:0032101;GO:0032501;GO:…	GO:0004857;GO:0004866;GO:0004869;GO:0019207;GO:0019210;GO:0030234;GO:0030414;GO:0061134;GO:0061135	GO:0005576;GO:0005615;GO:0031982;GO:0031988;GO:0043226;GO:0043227;GO:0043230;GO:0044421;GO:0065010;GO:0070062;GO:0072562		SM00043	6	3	3	17.4	12	12	39.34	0	21.961	61989000	16	0.001	0.001	0.001	0.001	0.001	0.001	0.001	0.001	0.001	24.3793	24.0434	24.4474
	0.138253	0.228514		1.3135	-1.17159	AIDA_HUMAN	AIDA_HUMANAxininteractor,dorsalization-associatedprotein	Q96BJ3	AIDA_HUMAN Axin interactor, dorsalization-associated protein	AIDA	AIDA	NOG48105		biological regulation;developmental process;dorsal/ventral pattern formation;negative regulation of biological process;negative regulation of catalytic activity;negative regulation of cell communication;negative regulation of cellular process;negative regulation of intracellular protein kinase cascade;negative regulation of JNK cascade;negative regulation of JUN kinase activity;negative regulatio…		cell part;cytoplasm;intracellular part		CHARAFE_BREAST_CANCER_LUMINAL_VS_MESENCHYMAL_DN;CREIGHTON_ENDOCRINE_THERAPY_RESISTANCE_1;DODD_NASOPHARYNGEAL_CARCINOMA_DN;FOSTER_TOLERANT_MACROPHAGE_DN;GOBERT_OLIGODENDROCYTE_DIFFERENTIATION_UP;GSE11924_TH1_VS_TH2_CD4_TCELL_UP;GSE13484_12H_UNSTIM_VS_YF17D_VACCINE_STIM_PBMC_DN;GSE13484_UNSTIM_VS_YF17D_VACCINE_STIM_PBMC_DN;GSE14000_TRANSLATED_RNA_VS_MRNA_16H_LPS_DC_DN;GSE14000_UNSTIM_VS_16H_LPS_DC_…	GO:0001932;GO:0003002;GO:0006469;GO:0007389;GO:0009953;GO:0009966;GO:0009968;GO:0010627;GO:0010646;GO:0010648;GO:0010741;GO:0019220;GO:0019222;GO:0023051;GO:0023057;GO:0031323;GO:0031399;GO:0032268;GO:0032502;GO:0033673;GO:0042325;GO:0043086;GO:0043393;GO:0043405;GO:0043407;GO:0043408;GO:0043409;GO:0043496;GO:0043506;GO:0043508;GO:0043549;GO:0044092;GO:0045859;GO:0046328;GO:0046329;GO:0048519;GO:…		GO:0005737;GO:0044424;GO:0044464			10	10	10	46.4	46.4	46.4	35.023	0	19.023	321640000	34	24.7107	25.5785	24.8389	24.7116	23.5923	23.4002	24.7396	24.7074	26.3667	22.8566	22.5672	22.7655
	0.935082	-15.9415		0.93426	-14.0666	AIF1_HUMAN	AIF1_HUMANAllograftinflammatoryfactor1	P55008	AIF1_HUMAN Allograft inflammatory factor 1	AIF1	AIF1	NOG262998		actin cytoskeleton organization;actin filament bundle assembly;actin filament organization;actin filament polymerization;actin filament-based process;actin polymerization or depolymerization;biological regulation;cell activation;cell communication;cellular component assembly;cellular component assembly at cellular level;cellular component organization;cellular component organization at cellular l…	actin binding;actin filament binding;binding;calcium ion binding;cation binding;cytoskeletal protein binding;ion binding;metal ion binding;protein binding	actin filament;cell part;cell projection;cell projection membrane;cell projection part;cytoplasm;cytoplasmic part;cytoskeletal part;cytosol;intracellular membrane-bounded organelle;intracellular organelle;intracellular organelle part;intracellular part;lamellipodium;leading edge membrane;macromolecular complex;membrane part;membrane-bounded organelle;nucleus;organelle;organelle part;perikaryon;pe…		ACOSTA_PROLIFERATION_INDEPENDENT_MYC_TARGETS_DN;ALK_DN.V1_UP;BAELDE_DIABETIC_NEPHROPATHY_DN;BASSO_CD40_SIGNALING_DN;BASSO_HAIRY_CELL_LEUKEMIA_DN;CAR_MYST2;CELL_CYCLE_ARREST_GO_0007050;CELL_CYCLE_GO_0007049;CELL_PROLIFERATION_GO_0008283;CHEN_METABOLIC_SYNDROM_NETWORK;chr6p21;COATES_MACROPHAGE_M1_VS_M2_UP;DCA_UP.V1_UP;DEFENSE_RESPONSE;FLECHNER_BIOPSY_KIDNEY_TRANSPLANT_REJECTED_VS_OK_UP;FULCHER_INFL…	GO:0001774;GO:0001775;GO:0001932;GO:0001934;GO:0002274;GO:0002376;GO:0002682;GO:0002684;GO:0002685;GO:0002687;GO:0002688;GO:0002690;GO:0002694;GO:0002696;GO:0006461;GO:0006911;GO:0006950;GO:0006952;GO:0006954;GO:0006979;GO:0006996;GO:0007010;GO:0007015;GO:0007154;GO:0007165;GO:0007264;GO:0007265;GO:0008154;GO:0008284;GO:0008285;GO:0009605;GO:0009611;GO:0009628;GO:0009719;GO:0009725;GO:0009889;GO:…	GO:0003779;GO:0005488;GO:0005509;GO:0005515;GO:0008092;GO:0043167;GO:0043169;GO:0046872;GO:0051015	GO:0001891;GO:0005634;GO:0005737;GO:0005829;GO:0005884;GO:0030027;GO:0031253;GO:0031256;GO:0032587;GO:0032991;GO:0042995;GO:0043204;GO:0043226;GO:0043227;GO:0043229;GO:0043231;GO:0043234;GO:0044422;GO:0044424;GO:0044425;GO:0044430;GO:0044444;GO:0044446;GO:0044459;GO:0044463;GO:0044464;GO:0048471			1	1	1	10.2	10.2	10.2	16.703	0.0091603	1.8079	36443000	3	23.8164	0.001	24.0102	21.6044	20.5975	0.001	0.001	0.001	0.001	0.001	0.001	0.001
	2.26414	1.33165		0.425071	-0.714094	AIFM1_HUMAN	AIFM1_HUMANApoptosis-inducingfactor1,mitochondrial	O95831	AIFM1_HUMAN Apoptosis-inducing factor 1, mitochondrial	AIFM1	AIFM1	COG0446	1.1.1.-	activation of caspase activity;apoptosis;apoptosis in response to endoplasmic reticulum stress;biological regulation;catabolic process;cell death;cell differentiation;cell redox homeostasis;cellular catabolic process;cellular component assembly;cellular component assembly at cellular level;cellular component biogenesis;cellular component organization;cellular component organization at cellular le…	binding;catalytic activity;coenzyme binding;cofactor binding;DNA binding;electron carrier activity;FAD binding;flavin adenine dinucleotide binding;NAD(P)H oxidase activity;nucleic acid binding;oxidoreductase activity;oxidoreductase activity, acting on NADH or NADPH;oxidoreductase activity, acting on NADH or NADPH, oxygen as acceptor	cell part;cytoplasmic part;cytosol;intracellular membrane-bounded organelle;intracellular organelle;intracellular organelle part;intracellular part;membrane;membrane-bounded organelle;membrane-enclosed lumen;mitochondrial inner membrane;mitochondrial intermembrane space;mitochondrial membrane;mitochondrial part;mitochondrion;nucleus;organelle;organelle envelope lumen;organelle inner membrane;orga…	Apoptosis	APOPTOSIS_GO;APOPTOTIC_NUCLEAR_CHANGES;APOPTOTIC_PROGRAM;BENPORATH_MYC_MAX_TARGETS;BIOCARTA_CERAMIDE_PATHWAY;BIOCARTA_MITOCHONDRIA_PATHWAY;BIOPOLYMER_CATABOLIC_PROCESS;BIOPOLYMER_METABOLIC_PROCESS;BRUINS_UVC_RESPONSE_LATE;BURTON_ADIPOGENESIS_5;CASORELLI_ACUTE_PROMYELOCYTIC_LEUKEMIA_DN;CATABOLIC_PROCESS;CCAATNNSNNNGCG_UNKNOWN;CELL_DEVELOPMENT;CELL_STRUCTURE_DISASSEMBLY_DURING_APOPTOSIS;CELLULAR_CA…	GO:0000737;GO:0006139;GO:0006259;GO:0006308;GO:0006309;GO:0006323;GO:0006461;GO:0006807;GO:0006915;GO:0006919;GO:0006996;GO:0008152;GO:0008219;GO:0009056;GO:0009057;GO:0009987;GO:0010257;GO:0010941;GO:0010942;GO:0010952;GO:0012501;GO:0016043;GO:0016265;GO:0019222;GO:0019725;GO:0022607;GO:0030154;GO:0030182;GO:0030261;GO:0032502;GO:0032981;GO:0033108;GO:0034621;GO:0034622;GO:0034641;GO:0042592;GO:…	GO:0003676;GO:0003677;GO:0003824;GO:0005488;GO:0009055;GO:0016174;GO:0016491;GO:0016651;GO:0048037;GO:0050660;GO:0050662;GO:0050664;GO:0071949	GO:0005634;GO:0005739;GO:0005743;GO:0005758;GO:0005829;GO:0016020;GO:0019866;GO:0031090;GO:0031966;GO:0031970;GO:0031974;GO:0043226;GO:0043227;GO:0043229;GO:0043231;GO:0044422;GO:0044424;GO:0044429;GO:0044444;GO:0044446;GO:0044464;GO:0048471			26	26	26	48.9	48.9	48.9	66.9	0	169.48	6162300000	360	28.7507	28.5967	28.8029	28.9355	27.6416	27.2307	29.6606	30.474	30.0107	28.2186	26.8042	26.6428
	3.46605	1.2919		1.15665	1.86383	AIMP1_HUMAN	AIMP1_HUMANAminoacyltRNAsynthasecomplex-interactingmultifunctionalprotein1	Q12904	AIMP1_HUMAN Aminoacyl tRNA synthase complex-interacting multifunctional protein 1	AIMP1	AIMP1	COG0073		alcohol metabolic process;amine metabolic process;amino acid activation;anatomical structure formation involved in morphogenesis;angiogenesis;apoptosis;biological adhesion;biological regulation;carbohydrate metabolic process;carboxylic acid metabolic process;cell adhesion;cell communication;cell death;cell migration;cell motility;cell-cell signaling;cellular amine metabolic process;cellular amino…	binding;cytokine activity;enzyme binding;GTPase binding;identical protein binding;nucleic acid binding;protein binding;protein dimerization activity;protein homodimerization activity;receptor binding;RNA binding;tRNA binding	aminoacyl-tRNA synthetase multienzyme complex;cell part;cell surface;cytoplasm;cytoplasmic membrane-bounded vesicle;cytoplasmic part;cytoplasmic vesicle;cytosol;endoplasmic reticulum;extracellular region part;extracellular space;Golgi apparatus;intracellular membrane-bounded organelle;intracellular organelle;intracellular part;macromolecular complex;membrane;membrane-bounded organelle;membrane-bo…		AMINE_METABOLIC_PROCESS;AMINO_ACID_AND_DERIVATIVE_METABOLIC_PROCESS;AMINO_ACID_METABOLIC_PROCESS;BEHAVIOR;BILANGES_RAPAMYCIN_SENSITIVE_VIA_TSC1_AND_TSC2;BIOPOLYMER_METABOLIC_PROCESS;BIOSYNTHETIC_PROCESS;BOYAULT_LIVER_CANCER_SUBCLASS_G3_UP;BRUINS_UVC_RESPONSE_LATE;CARBOXYLIC_ACID_METABOLIC_PROCESS;CELL_CELL_SIGNALING;CELL_MIGRATION;CELL_PROLIFERATION_GO_0008283;CELLULAR_BIOSYNTHETIC_PROCESS;CELLUL…	GO:0001525;GO:0001936;GO:0001937;GO:0002376;GO:0005975;GO:0005996;GO:0006006;GO:0006066;GO:0006082;GO:0006139;GO:0006399;GO:0006418;GO:0006520;GO:0006807;GO:0006915;GO:0006928;GO:0006935;GO:0006950;GO:0006952;GO:0006954;GO:0007154;GO:0007155;GO:0007165;GO:0007267;GO:0008152;GO:0008219;GO:0008285;GO:0009308;GO:0009605;GO:0009611;GO:0009987;GO:0010467;GO:0012501;GO:0016070;GO:0016265;GO:0016477;GO:…	GO:0000049;GO:0003676;GO:0003723;GO:0005102;GO:0005125;GO:0005488;GO:0005515;GO:0019899;GO:0042802;GO:0042803;GO:0046983;GO:0051020	GO:0005615;GO:0005634;GO:0005737;GO:0005783;GO:0005794;GO:0005829;GO:0009986;GO:0016020;GO:0016023;GO:0017101;GO:0030133;GO:0031410;GO:0031982;GO:0031988;GO:0032991;GO:0043226;GO:0043227;GO:0043229;GO:0043231;GO:0043234;GO:0044421;GO:0044424;GO:0044444;GO:0044464	REACT_15306		12	12	12	60.6	60.6	60.6	34.352	0	161.19	5051800000	265	28.3571	28.4162	28.5105	27.8089	25.641	25.6289	29.8294	29.5108	29.8193	28.551	27.8014	28.3179
	1.81124	0.96243		2.40314	3.21437	AIMP2_HUMAN	AIMP2_HUMANAminoacyltRNAsynthasecomplex-interactingmultifunctionalprotein2	Q13155	AIMP2_HUMAN Aminoacyl tRNA synthase complex-interacting multifunctional protein 2	AIMP2	AIMP2	NOG72943		amine metabolic process;amino acid activation;apoptosis;biological regulation;carboxylic acid metabolic process;cell death;cell differentiation;cellular amine metabolic process;cellular amino acid metabolic process;cellular developmental process;cellular ketone metabolic process;cellular macromolecule metabolic process;cellular metabolic process;cellular nitrogen compound metabolic process;cellul…		cell part;cytoplasmic part;cytosol;intracellular membrane-bounded organelle;intracellular organelle;intracellular part;membrane;membrane-bounded organelle;nucleus;organelle		AMUNDSON_GAMMA_RADIATION_RESPONSE;BASSO_B_LYMPHOCYTE_NETWORK;BENPORATH_MYC_MAX_TARGETS;BERENJENO_TRANSFORMED_BY_RHOA_UP;BILD_MYC_ONCOGENIC_SIGNATURE;BLALOCK_ALZHEIMERS_DISEASE_UP;BOQUEST_STEM_CELL_CULTURED_VS_FRESH_UP;BROWNE_HCMV_INFECTION_10HR_DN;CAFFAREL_RESPONSE_TO_THC_8HR_3_UP;CAFFAREL_RESPONSE_TO_THC_8HR_5_UP;CHANG_CORE_SERUM_RESPONSE_UP;chr7p22;DANG_BOUND_BY_MYC;DANG_MYC_TARGETS_UP;DIAZ_CHR…	GO:0006082;GO:0006139;GO:0006399;GO:0006418;GO:0006520;GO:0006807;GO:0006915;GO:0008152;GO:0008219;GO:0008285;GO:0009308;GO:0009893;GO:0009987;GO:0010467;GO:0010604;GO:0012501;GO:0016070;GO:0016265;GO:0019222;GO:0019752;GO:0030154;GO:0030855;GO:0031323;GO:0031325;GO:0031396;GO:0031398;GO:0031399;GO:0031401;GO:0032268;GO:0032270;GO:0032502;GO:0034641;GO:0034660;GO:0042127;GO:0042180;GO:0043038;GO:…		GO:0005634;GO:0005829;GO:0016020;GO:0043226;GO:0043227;GO:0043229;GO:0043231;GO:0044424;GO:0044444;GO:0044464	REACT_15306		8	8	8	35	35	35	35.348	0	53.583	1205600000	118	25.5287	26.015	25.9719	25.373	23.6699	23.9691	27.1105	26.4884	26.804	27.6435	27.3154	27.6962
	1.29874	1.29727		1.63022	1.52981	AIP_HUMAN	AIP_HUMANAHreceptor-interactingprotein	O00170	AIP_HUMAN AH receptor-interacting protein	AIP	AIP	NOG250378		biological regulation;cellular macromolecule metabolic process;cellular metabolic process;cellular process;cellular protein metabolic process;cellular response to stimulus;establishment of localization;establishment of localization in cell;establishment of protein localization;establishment of protein localization in mitochondrion;establishment of protein localization to organelle;intracellular p…	binding;GAF domain binding;molecular transducer activity;protein binding;protein binding transcription factor activity;protein domain specific binding;signal transducer activity;transcription coactivator activity;transcription cofactor activity;transcription factor binding;transcription factor binding transcription factor activity;unfolded protein binding	cell part;cytoplasm;cytoplasmic part;cytosol;intracellular organelle part;intracellular part;membrane;nuclear part;nucleoplasm;organelle part		BYSTRYKH_HEMATOPOIESIS_STEM_CELL_AND_BRAIN_QTL_TRANS;CELLULAR_MACROMOLECULE_METABOLIC_PROCESS;CELLULAR_PROTEIN_METABOLIC_PROCESS;CHIARETTI_ACUTE_LYMPHOBLASTIC_LEUKEMIA_ZAP70;chr11q13;CRGAARNNNNCGA_UNKNOWN;CYTOPLASM;CYTOPLASMIC_PART;CYTOSOL;DAIRKEE_TERT_TARGETS_UP;ESTABLISHMENT_OF_LOCALIZATION;ESTABLISHMENT_OF_PROTEIN_LOCALIZATION;GARY_CD5_TARGETS_UP;GCCATNTTG_V$YY1_Q6;GCM_AIP;GCM_FANCC;GCM_HDAC1;…	GO:0006457;GO:0006605;GO:0006626;GO:0006805;GO:0006810;GO:0006839;GO:0006886;GO:0007165;GO:0008152;GO:0009966;GO:0009987;GO:0010627;GO:0010738;GO:0015031;GO:0017038;GO:0019222;GO:0019538;GO:0022417;GO:0023051;GO:0043086;GO:0043170;GO:0044092;GO:0044237;GO:0044238;GO:0044260;GO:0044267;GO:0045184;GO:0046907;GO:0048583;GO:0050789;GO:0050790;GO:0050794;GO:0050896;GO:0051234;GO:0051336;GO:0051342;GO:…	GO:0000988;GO:0000989;GO:0003712;GO:0003713;GO:0004871;GO:0005488;GO:0005515;GO:0008134;GO:0019904;GO:0036004;GO:0051082;GO:0060089	GO:0005654;GO:0005737;GO:0005829;GO:0016020;GO:0044422;GO:0044424;GO:0044428;GO:0044444;GO:0044446;GO:0044464			17	17	17	62.1	62.1	62.1	37.636	0	223.14	9510700000	404	29.1777	29.1485	29.3799	28.4376	27.3669	27.0514	31.3061	29.7068	30.585	28.9817	29.2861	29.1775
	1.97272	0.60763		1.32201	1.10975	KAD2_HUMAN	KAD2_HUMANAdenylatekinase2,mitochondrial	P54819	KAD2_HUMAN Adenylate kinase 2, mitochondrial	AK2	AK2	COG0563	2.7.4.3	2'-deoxyribonucleotide metabolic process;ADP biosynthetic process;ADP metabolic process;AMP metabolic process;anatomical structure development;biosynthetic process;brain development;cellular biosynthetic process;cellular metabolic process;cellular nitrogen compound biosynthetic process;cellular nitrogen compound metabolic process;cellular process;dATP metabolic process;deoxyribonucleoside triphos…	adenyl nucleotide binding;adenyl ribonucleotide binding;adenylate kinase activity;ATP binding;binding;catalytic activity;kinase activity;nucleobase-containing compound kinase activity;nucleotide binding;nucleotide kinase activity;phosphotransferase activity, phosphate group as acceptor;purine nucleotide binding;purine ribonucleoside triphosphate binding;purine ribonucleotide binding;ribonucleotid…	cell part;cytoplasmic part;cytosol;extracellular membrane-bounded organelle;extracellular organelle;extracellular region part;extracellular vesicular exosome;intracellular organelle part;intracellular part;membrane;membrane-bounded organelle;membrane-bounded vesicle;membrane-enclosed lumen;mitochondrial inner membrane;mitochondrial intermembrane space;mitochondrial membrane;mitochondrial part;org…	Purine metabolism	AAGCACT,MIR-520F;ACTGTGA,MIR-27A,MIR-27B;AGCACTT,MIR-93,MIR-302A,MIR-302B,MIR-302C,MIR-302D,MIR-372,MIR-373,MIR-520E,MIR-520A,MIR-526B,MIR-520B,MIR-520C,MIR-520D;AGUIRRE_PANCREATIC_CANCER_COPY_NUMBER_DN;ATGCTGC,MIR-103,MIR-107;BLALOCK_ALZHEIMERS_DISEASE_UP;BOYAULT_LIVER_CANCER_SUBCLASS_G1_DN;BURTON_ADIPOGENESIS_5;BUYTAERT_PHOTODYNAMIC_THERAPY_STRESS_DN;BYSTRYKH_HEMATOPOIESIS_STEM_CELL_QTL_TRANS;C…	GO:0001889;GO:0006091;GO:0006119;GO:0006139;GO:0006163;GO:0006164;GO:0006172;GO:0006753;GO:0006793;GO:0006796;GO:0006807;GO:0007420;GO:0008152;GO:0009058;GO:0009117;GO:0009123;GO:0009126;GO:0009132;GO:0009133;GO:0009135;GO:0009136;GO:0009141;GO:0009144;GO:0009150;GO:0009151;GO:0009152;GO:0009161;GO:0009165;GO:0009167;GO:0009179;GO:0009180;GO:0009185;GO:0009188;GO:0009200;GO:0009215;GO:0009259;GO:…	GO:0000166;GO:0003824;GO:0004017;GO:0005488;GO:0005524;GO:0016301;GO:0016740;GO:0016772;GO:0016776;GO:0017076;GO:0019201;GO:0019205;GO:0030554;GO:0032553;GO:0032555;GO:0032559;GO:0035639	GO:0005743;GO:0005758;GO:0005829;GO:0016020;GO:0019866;GO:0031090;GO:0031966;GO:0031970;GO:0031974;GO:0031982;GO:0031988;GO:0043226;GO:0043227;GO:0043230;GO:0044421;GO:0044422;GO:0044424;GO:0044429;GO:0044444;GO:0044446;GO:0044464;GO:0065010;GO:0070062	REACT_21330		16	16	16	75.3	75.3	75.3	26.477	0	153.01	12606000000	566	30.0201	30.2906	30.2137	28.9331	28.4524	27.7319	30.7374	30.6226	30.9873	29.6776	29.1214	29.6475
	0.167955	0.104144		0.146138	-0.279594	KAD3_HUMAN	KAD3_HUMANGTP:AMPphosphotransferaseAK3,mitochondrial	Q9UIJ7	KAD3_HUMAN GTP:AMP phosphotransferase AK3, mitochondrial	AK3	AK3	COG0563	2.7.4.10	ADP biosynthetic process;ADP metabolic process;AMP metabolic process;biological regulation;biosynthetic process;blood coagulation;cellular biosynthetic process;cellular metabolic process;cellular nitrogen compound biosynthetic process;cellular nitrogen compound metabolic process;cellular process;coagulation;GTP metabolic process;hemostasis;heterocycle biosynthetic process;heterocycle metabolic pr…	adenyl nucleotide binding;adenyl ribonucleotide binding;ATP binding;binding;catalytic activity;GTP binding;guanyl nucleotide binding;guanyl ribonucleotide binding;kinase activity;nucleobase-containing compound kinase activity;nucleoside triphosphate adenylate kinase activity;nucleotide binding;phosphotransferase activity, phosphate group as acceptor;purine nucleotide binding;purine ribonucleoside…	cell part;cytoplasmic part;intracellular membrane-bounded organelle;intracellular organelle;intracellular organelle lumen;intracellular organelle part;intracellular part;membrane-bounded organelle;membrane-enclosed lumen;mitochondrial matrix;mitochondrial part;mitochondrion;organelle;organelle lumen;organelle part	Pyrimidine metabolism	ACEVEDO_LIVER_CANCER_DN;ACEVEDO_NORMAL_TISSUE_ADJACENT_TO_LIVER_TUMOR_DN;BENPORATH_NANOG_TARGETS;BENPORATH_SOX2_TARGETS;BOCHKIS_FOXA2_TARGETS;CACGTG_V$MYC_Q2;CAGGTG_V$E12_Q6;chr9p24;CREIGHTON_ENDOCRINE_THERAPY_RESISTANCE_3;CYTOPLASM;CYTOPLASMIC_PART;FIRESTEIN_PROLIFERATION;GOLDRATH_ANTIGEN_RESPONSE;GOLDRATH_EFF_VS_MEMORY_CD8_TCELL_UP;GRAESSMANN_APOPTOSIS_BY_DOXORUBICIN_DN;GSE12366_GC_VS_MEMORY_BC…	GO:0006139;GO:0006163;GO:0006164;GO:0006172;GO:0006213;GO:0006220;GO:0006753;GO:0006807;GO:0007596;GO:0007599;GO:0008152;GO:0009058;GO:0009116;GO:0009117;GO:0009119;GO:0009123;GO:0009126;GO:0009132;GO:0009133;GO:0009135;GO:0009136;GO:0009141;GO:0009144;GO:0009147;GO:0009150;GO:0009152;GO:0009161;GO:0009165;GO:0009167;GO:0009179;GO:0009180;GO:0009185;GO:0009188;GO:0009199;GO:0009205;GO:0009208;GO:…	GO:0000166;GO:0003824;GO:0005488;GO:0005524;GO:0005525;GO:0016301;GO:0016740;GO:0016772;GO:0016776;GO:0017076;GO:0019001;GO:0019205;GO:0030554;GO:0032553;GO:0032555;GO:0032559;GO:0032561;GO:0035639;GO:0046899	GO:0005739;GO:0005759;GO:0031974;GO:0043226;GO:0043227;GO:0043229;GO:0043231;GO:0043233;GO:0044422;GO:0044424;GO:0044429;GO:0044444;GO:0044446;GO:0044464;GO:0070013	REACT_24970		15	15	15	61.2	61.2	61.2	25.565	0	109	1860700000	135	27.6303	27.995	27.6974	26.2914	26.1322	25.654	27.7093	27.6387	28.2871	26.2526	24.3908	26.5953
	0.934711	16.162		0	0	KAD4_HUMAN	KAD4_HUMANAdenylatekinase4,mitochondrial	P27144	KAD4_HUMAN Adenylate kinase 4, mitochondrial	AK4	AK4	COG0563	2.7.4.10;2.7.4.6	ADP biosynthetic process;ADP metabolic process;AMP metabolic process;anatomical structure development;ATP metabolic process;biosynthetic process;brain development;cellular biosynthetic process;cellular metabolic process;cellular nitrogen compound biosynthetic process;cellular nitrogen compound metabolic process;cellular process;developmental process;GTP metabolic process;heterocycle biosynthetic …	adenyl nucleotide binding;adenyl ribonucleotide binding;adenylate kinase activity;ATP binding;binding;catalytic activity;GTP binding;guanyl nucleotide binding;guanyl ribonucleotide binding;kinase activity;nucleobase-containing compound kinase activity;nucleoside diphosphate kinase activity;nucleoside triphosphate adenylate kinase activity;nucleotide binding;nucleotide kinase activity;phosphotrans…	cell part;cytoplasmic part;extracellular membrane-bounded organelle;extracellular organelle;extracellular region part;extracellular vesicular exosome;intracellular membrane-bounded organelle;intracellular organelle;intracellular organelle lumen;intracellular organelle part;intracellular part;membrane-bounded organelle;membrane-bounded vesicle;membrane-enclosed lumen;mitochondrial matrix;mitochond…	Purine metabolism	AKT_UP.V1_UP;AKT_UP_MTOR_DN.V1_UP;ALFANO_MYC_TARGETS;ALONSO_METASTASIS_UP;ATF2_S_UP.V1_DN;ATF2_UP.V1_DN;BASAKI_YBX1_TARGETS_DN;BENPORATH_NANOG_TARGETS;BILD_E2F3_ONCOGENIC_SIGNATURE;BRACHAT_RESPONSE_TO_CAMPTOTHECIN_DN;BRACHAT_RESPONSE_TO_METHOTREXATE_DN;BROWNE_HCMV_INFECTION_24HR_UP;CAGTGTT,MIR-141,MIR-200A;CAIRO_HEPATOBLASTOMA_CLASSES_UP;CHANDRAN_METASTASIS_TOP50_UP;CHANDRAN_METASTASIS_UP;chr1p31…	GO:0001889;GO:0006139;GO:0006163;GO:0006164;GO:0006165;GO:0006172;GO:0006753;GO:0006793;GO:0006796;GO:0006807;GO:0007420;GO:0008152;GO:0009058;GO:0009117;GO:0009123;GO:0009126;GO:0009132;GO:0009133;GO:0009135;GO:0009136;GO:0009141;GO:0009142;GO:0009144;GO:0009150;GO:0009152;GO:0009161;GO:0009165;GO:0009167;GO:0009179;GO:0009180;GO:0009185;GO:0009188;GO:0009199;GO:0009205;GO:0009259;GO:0009260;GO:…	GO:0000166;GO:0003824;GO:0004017;GO:0004550;GO:0005488;GO:0005524;GO:0005525;GO:0016301;GO:0016740;GO:0016772;GO:0016776;GO:0017076;GO:0019001;GO:0019201;GO:0019205;GO:0030554;GO:0032553;GO:0032555;GO:0032559;GO:0032561;GO:0035639;GO:0046899	GO:0005739;GO:0005759;GO:0031974;GO:0031982;GO:0031988;GO:0043226;GO:0043227;GO:0043229;GO:0043230;GO:0043231;GO:0043233;GO:0044421;GO:0044422;GO:0044424;GO:0044429;GO:0044444;GO:0044446;GO:0044464;GO:0065010;GO:0070013;GO:0070062			1	1	1	16.1	16.1	16.1	25.268	0	10.501	41237000	3	0.001	0.001	0.001	0.001	0.001	0.001	24.6392	23.8487	0.001	0.001	0.001	0.001
	0.926286	-14.2127		0.427243	-6.79477	KAD5_HUMAN	KAD5_HUMANAdenylatekinaseisoenzyme5	Q9Y6K8	KAD5_HUMAN Adenylate kinase isoenzyme 5	AK5	AK5	COG0563	2.7.4.3;2.7.4.6	2'-deoxyribonucleotide biosynthetic process;2'-deoxyribonucleotide metabolic process;ADP biosynthetic process;ADP metabolic process;ATP metabolic process;biosynthetic process;cellular biosynthetic process;cellular metabolic process;cellular nitrogen compound biosynthetic process;cellular nitrogen compound metabolic process;cellular process;dADP biosynthetic process;dADP metabolic process;deoxyrib…	adenyl nucleotide binding;adenyl ribonucleotide binding;adenylate kinase activity;ATP binding;binding;catalytic activity;kinase activity;nucleobase-containing compound kinase activity;nucleoside diphosphate kinase activity;nucleoside kinase activity;nucleotide binding;nucleotide kinase activity;phosphotransferase activity, phosphate group as acceptor;purine nucleotide binding;purine ribonucleosid…	cell part;cytoplasm;cytoplasmic part;cytoskeletal part;cytosol;intracellular organelle part;intracellular part;microtubule organizing center;organelle part	Purine metabolism	ACEVEDO_LIVER_CANCER_WITH_H3K9ME3_UP;ACEVEDO_METHYLATED_IN_LIVER_CANCER_DN;ATGTACA,MIR-493;BIOSYNTHETIC_PROCESS;BLALOCK_ALZHEIMERS_DISEASE_DN;CAGGTG_V$E12_Q6;CAMP_UP.V1_DN;CELLULAR_BIOSYNTHETIC_PROCESS;CHARAFE_BREAST_CANCER_BASAL_VS_MESENCHYMAL_DN;CHARAFE_BREAST_CANCER_LUMINAL_VS_MESENCHYMAL_DN;CHICAS_RB1_TARGETS_CONFLUENT;chr1p31;CYTOPLASM;CYTOPLASMIC_PART;CYTOSOL;DCA_UP.V1_UP;DEURIG_T_CELL_PROL…	GO:0006139;GO:0006163;GO:0006164;GO:0006165;GO:0006172;GO:0006173;GO:0006220;GO:0006221;GO:0006753;GO:0006793;GO:0006796;GO:0006807;GO:0008152;GO:0009058;GO:0009117;GO:0009132;GO:0009133;GO:0009135;GO:0009136;GO:0009141;GO:0009142;GO:0009144;GO:0009150;GO:0009151;GO:0009152;GO:0009153;GO:0009165;GO:0009179;GO:0009180;GO:0009182;GO:0009183;GO:0009185;GO:0009186;GO:0009188;GO:0009189;GO:0009199;GO:…	GO:0000166;GO:0003824;GO:0004017;GO:0004550;GO:0005488;GO:0005524;GO:0016301;GO:0016740;GO:0016772;GO:0016776;GO:0017076;GO:0019201;GO:0019205;GO:0019206;GO:0030554;GO:0032553;GO:0032555;GO:0032559;GO:0035639	GO:0005737;GO:0005815;GO:0005829;GO:0044422;GO:0044424;GO:0044430;GO:0044444;GO:0044446;GO:0044464	REACT_21330		2	2	2	4.4	4.4	4.4	63.332	0.0052776	2.0755	10429000	0	22.9718	19.6683	0.001	20.3853	0.001	0.001	0.001	0.001	0.001	0.001	0.001	0.001
+	6.95625	26.228	+	7.09028	25.8339	KAD6_HUMAN	KAD6_HUMANAdenylatekinaseisoenzyme6	Q9Y3D8	KAD6_HUMAN Adenylate kinase isoenzyme 6	AK6	AK6	COG1936	2.7.4.3	cellular metabolic process;cellular nitrogen compound metabolic process;cellular process;metabolic process;nitrogen compound metabolic process;nucleobase-containing compound metabolic process;nucleobase-containing small molecule metabolic process;nucleoside phosphate metabolic process;nucleotide metabolic process;nucleotide phosphorylation;phosphate-containing compound metabolic process;phosphoru…	adenyl nucleotide binding;adenyl ribonucleotide binding;adenylate kinase activity;ATP binding;ATPase activity;binding;catalytic activity;hydrolase activity;hydrolase activity, acting on acid anhydrides;hydrolase activity, acting on acid anhydrides, in phosphorus-containing anhydrides;kinase activity;nucleobase-containing compound kinase activity;nucleoside-triphosphatase activity;nucleotide bindi…	Cajal body;cell part;intracellular organelle part;intracellular part;membrane;nuclear body;nuclear part;nucleoplasm;nucleoplasm part;organelle part			GO:0006139;GO:0006753;GO:0006793;GO:0006796;GO:0006807;GO:0008152;GO:0009117;GO:0009987;GO:0016310;GO:0034641;GO:0044237;GO:0044238;GO:0044281;GO:0046939;GO:0055086	GO:0000166;GO:0003824;GO:0004017;GO:0005488;GO:0005524;GO:0016301;GO:0016462;GO:0016740;GO:0016772;GO:0016776;GO:0016787;GO:0016817;GO:0016818;GO:0016887;GO:0017076;GO:0017111;GO:0019201;GO:0019205;GO:0030554;GO:0032553;GO:0032555;GO:0032559;GO:0035639	GO:0005654;GO:0015030;GO:0016020;GO:0016604;GO:0044422;GO:0044424;GO:0044428;GO:0044446;GO:0044451;GO:0044464			4	4	4	37.8	37.8	37.8	20.061	0	28.611	432500000	15	0.001	0.001	0.001	0.001	0.001	0.001	26.4018	25.6348	26.6505	26.3332	25.3694	25.8021
	0.343205	-8.30192		0	0	AKA11_HUMAN	AKA11_HUMANA-kinaseanchorprotein11	Q9UKA4	AKA11_HUMAN A-kinase anchor protein 11	AKAP11	AKAP11	NOG28523		biological regulation;cellular process;cellular response to stimulus;intracellular signal transduction;regulation of biological process;regulation of cellular process;regulation of intracellular protein kinase cascade;regulation of protein kinase A signaling cascade;regulation of response to stimulus;regulation of signal transduction;regulation of signaling;response to stimulus;signal transduction	binding;enzyme binding;phosphatase binding;protein binding;protein kinase A binding;protein phosphatase 1 binding;protein phosphatase binding	cell part;cytoplasmic part;cytoskeletal part;intracellular membrane-bounded organelle;intracellular organelle;intracellular organelle part;intracellular part;membrane-bounded organelle;microbody;microtubule organizing center;organelle;organelle part;peroxisome		ACATTCC,MIR-1,MIR-206;BAELDE_DIABETIC_NEPHROPATHY_DN;BLALOCK_ALZHEIMERS_DISEASE_DN;CTTTGT_V$LEF1_Q2;DACOSTA_UV_RESPONSE_VIA_ERCC3_DN;ENK_UV_RESPONSE_KERATINOCYTE_DN;ENZYME_BINDING;FLECHNER_BIOPSY_KIDNEY_TRANSPLANT_REJECTED_VS_OK_DN;GEORGES_TARGETS_OF_MIR192_AND_MIR215;GSE14769_UNSTIM_VS_360MIN_LPS_BMDM_UP;GSE22886_IGG_IGA_MEMORY_BCELL_VS_BM_PLASMA_CELL_UP;GSE22886_IGM_MEMORY_BCELL_VS_BM_PLASMA_CE…	GO:0007165;GO:0009966;GO:0009987;GO:0010627;GO:0010738;GO:0023051;GO:0035556;GO:0048583;GO:0050789;GO:0050794;GO:0050896;GO:0051716;GO:0065007	GO:0005488;GO:0005515;GO:0008157;GO:0019899;GO:0019902;GO:0019903;GO:0051018	GO:0005777;GO:0005815;GO:0042579;GO:0043226;GO:0043227;GO:0043229;GO:0043231;GO:0044422;GO:0044424;GO:0044430;GO:0044444;GO:0044446;GO:0044464			5	5	5	4.2	4.2	4.2	210.51	0.0056541	2.0451	12450000	7	22.5306	22.3534	0.001	0.001	0.001	0.001	0.001	0.001	19.9773	0.001	0.001	0.001
	0.992604	0.448135		0.0881988	-0.199422	AKP13_HUMAN	AKP13_HUMANA-kinaseanchorprotein13	Q12802	AKP13_HUMAN A-kinase anchor protein 13	AKAP13	AKAP13	COG5422		biological regulation;cell surface receptor linked signaling pathway;cellular macromolecule metabolic process;cellular metabolic process;cellular process;cellular protein metabolic process;cellular response to stimulus;enzyme linked receptor protein signaling pathway;establishment of localization;establishment of localization in cell;intracellular signal transduction;intracellular transport;macro…	binding;cAMP-dependent protein kinase activity;catalytic activity;cation binding;cyclic nucleotide-dependent protein kinase activity;enzyme regulator activity;GTPase regulator activity;guanyl-nucleotide exchange factor activity;ion binding;kinase activity;metal ion binding;molecular transducer activity;nucleoside-triphosphatase regulator activity;phosphotransferase activity, alcohol group as acce…	cell part;cytoplasm;cytoplasmic part;cytosol;intracellular membrane-bounded organelle;intracellular organelle;intracellular part;membrane;membrane-bounded organelle;nucleus;organelle;perinuclear region of cytoplasm		ALONSO_METASTASIS_DN;AMUNDSON_GENOTOXIC_SIGNATURE;ATACCTC,MIR-202;BENPORATH_CYCLING_GENES;BIDUS_METASTASIS_DN;BIOCARTA_AKAP13_PATHWAY;BLALOCK_ALZHEIMERS_DISEASE_INCIPIENT_UP;BLALOCK_ALZHEIMERS_DISEASE_UP;BOQUEST_STEM_CELL_CULTURED_VS_FRESH_UP;BROWNE_HCMV_INFECTION_14HR_DN;CAGGTCC,MIR-492;CELL_FRACTION;chr15q24;CYTAGCAAY_UNKNOWN;DACOSTA_UV_RESPONSE_VIA_ERCC3_DN;DEBIASI_APOPTOSIS_BY_REOVIRUS_INFECT…	GO:0001932;GO:0006464;GO:0006468;GO:0006793;GO:0006796;GO:0006810;GO:0006913;GO:0007165;GO:0007166;GO:0007167;GO:0007169;GO:0007264;GO:0008152;GO:0009966;GO:0009987;GO:0010611;GO:0010941;GO:0010942;GO:0014743;GO:0016310;GO:0019220;GO:0019222;GO:0019538;GO:0023051;GO:0031323;GO:0031399;GO:0032268;GO:0035556;GO:0042325;GO:0042981;GO:0043065;GO:0043067;GO:0043068;GO:0043170;GO:0043412;GO:0043502;GO:…	GO:0003824;GO:0004672;GO:0004674;GO:0004690;GO:0004691;GO:0004871;GO:0005083;GO:0005085;GO:0005088;GO:0005089;GO:0005488;GO:0016301;GO:0016740;GO:0016772;GO:0016773;GO:0030234;GO:0030695;GO:0043167;GO:0043169;GO:0046872;GO:0060089;GO:0060589	GO:0005634;GO:0005737;GO:0005829;GO:0016020;GO:0043226;GO:0043227;GO:0043229;GO:0043231;GO:0044424;GO:0044444;GO:0044464;GO:0048471	REACT_11051;REACT_13638;REACT_18407	SM00109;SM00233;SM00325	39	39	39	24.9	24.9	24.9	307.55	0	138.27	955200000	130	26.4758	26.6655	26.5654	26.5343	24.5704	24.1955	27.132	27.2995	26.6196	24.9001	24.3017	25.5001
	0.0206061	0.688916		0.0305591	0.0753053	AK17A_HUMAN	AK17A_HUMANA-kinaseanchorprotein17A	Q02040	AK17A_HUMAN A-kinase anchor protein 17A	AKAP17A	AKAP17A	NOG271981		B cell activation;biological regulation;cell activation;cellular macromolecule metabolic process;cellular metabolic process;cellular nitrogen compound metabolic process;cellular process;cellular response to stimulus;immune system process;leukocyte activation;lymphocyte activation;macromolecule metabolic process;metabolic process;mRNA metabolic process;mRNA processing;nitrogen compound metabolic p…	binding;nucleotide binding;protein binding;protein kinase A binding	cell part;cytoplasm;intracellular membrane-bounded organelle;intracellular organelle;intracellular organelle part;intracellular part;macromolecular complex;membrane-bounded organelle;nuclear body;nuclear part;nuclear speck;nucleoplasm;nucleoplasm part;nucleus;organelle;organelle part;ribonucleoprotein complex;spliceosomal complex		BARRIER_CANCER_RELAPSE_NORMAL_SAMPLE_DN;BROWNE_HCMV_INFECTION_10HR_UP;BUYTAERT_PHOTODYNAMIC_THERAPY_STRESS_UP;CHANDRAN_METASTASIS_DN;CHEMNITZ_RESPONSE_TO_PROSTAGLANDIN_E2_UP;DIAZ_CHRONIC_MEYLOGENOUS_LEUKEMIA_UP;GSE20151_CTRL_VS_FUSOBACT_NUCLEATUM_NEUTROPHIL_DN;GSE22886_DAY0_VS_DAY7_MONOCYTE_IN_CULTURE_UP;GSE29617_CTRL_VS_DAY3_TIV_FLU_VACCINE_PBMC_2008_UP;GSE360_CTRL_VS_T_GONDII_MAC_DN;GSE360_DC_V…	GO:0001775;GO:0002376;GO:0006139;GO:0006355;GO:0006396;GO:0006397;GO:0006807;GO:0007165;GO:0008152;GO:0008380;GO:0009889;GO:0009987;GO:0010468;GO:0010556;GO:0016070;GO:0016071;GO:0019219;GO:0019222;GO:0031323;GO:0031326;GO:0034641;GO:0042113;GO:0043170;GO:0043484;GO:0044237;GO:0044238;GO:0044260;GO:0045321;GO:0046649;GO:0050789;GO:0050794;GO:0050896;GO:0051171;GO:0051252;GO:0051716;GO:0060255;GO:…	GO:0000166;GO:0005488;GO:0005515;GO:0051018	GO:0005634;GO:0005654;GO:0005681;GO:0005737;GO:0016604;GO:0016607;GO:0030529;GO:0032991;GO:0043226;GO:0043227;GO:0043229;GO:0043231;GO:0044422;GO:0044424;GO:0044428;GO:0044446;GO:0044451;GO:0044464			7	7	7	11.4	11.4	11.4	80.735	0	5.7792	94606000	8	23.9223	22.2505	0.001	23.4942	21.9278	21.2784	23.7598	0.001	24.4798	21.9469	21.6712	23.3083
+	1.1691	18.2598	+	6.51884	24.3084	AKAP2_HUMAN	AKAP2_HUMANA-kinaseanchorprotein2	Q9Y2D5	AKAP2_HUMAN A-kinase anchor protein 2	AKAP2	AKAP2	NOG44883						AACTTT_UNKNOWN;AAGCAAT,MIR-137;AKT_UP.V1_UP;AKT_UP_MTOR_DN.V1_UP;ATGCAGT,MIR-217;ATGCTGC,MIR-103,MIR-107;BOSCO_ALLERGEN_INDUCED_TH2_ASSOCIATED_MODULE;CAGCTG_V$AP4_Q5;CAGGGTC,MIR-504;CAGTATT,MIR-200B,MIR-200C,MIR-429;chr9q31;CTTTGA_V$LEF1_Q2;CUI_TCF21_TARGETS_2_DN;DOUGLAS_BMI1_TARGETS_UP;GGATTA_V$PITX2_Q2;GGTGTGT,MIR-329;GRAESSMANN_APOPTOSIS_BY_DOXORUBICIN_DN;GSE10239_NAIVE_VS_DAY4.5_EFF_CD8_TCELL…						7	7	7	12.9	12.9	12.9	94.659	0	9.2832	252890000	15	0.001	21.9555	0.001	0.001	0.001	0.001	24.7962	25.1478	26.793	24.8629	23.6219	24.4435
	1.25554	-0.746243		0.814083	1.86897	AKAP8_HUMAN	AKAP8_HUMANA-kinaseanchorprotein8	O43823	AKAP8_HUMAN A-kinase anchor protein 8	AKAP8	AKAP8	NOG47695		biological regulation;cell cycle phase;cell cycle process;cellular component organization;cellular component organization at cellular level;cellular component organization or biogenesis;cellular component organization or biogenesis at cellular level;cellular macromolecule metabolic process;cellular metabolic process;cellular nitrogen compound metabolic process;cellular process;cellular response t…	binding;cation binding;DNA binding;double-stranded DNA binding;ion binding;metal ion binding;nucleic acid binding;structure-specific DNA binding;transition metal ion binding;zinc ion binding	cell part;chromosome;condensed chromosome;cytoplasmic part;female pronucleus;Golgi apparatus;intracellular membrane-bounded organelle;intracellular non-membrane-bounded organelle;intracellular organelle;intracellular organelle part;intracellular part;membrane;membrane-bounded organelle;mitochondrion;non-membrane-bounded organelle;nuclear matrix;nuclear part;nucleoplasm;nucleus;organelle;organelle…		ACAWNRNSRCGG_UNKNOWN;BIOCARTA_AKAP95_PATHWAY;BYSTRYKH_HEMATOPOIESIS_STEM_CELL_AND_BRAIN_QTL_TRANS;CELL_CYCLE_GO_0007049;CELL_CYCLE_PHASE;CELL_CYCLE_PROCESS;chr19p13;DOUGLAS_BMI1_TARGETS_UP;GATTGGY_V$NFY_Q6_01;GCCATNTTG_V$YY1_Q6;GGGCGGR_V$SP1_Q6;GOLDRATH_HOMEOSTATIC_PROLIFERATION;GRAESSMANN_APOPTOSIS_BY_DOXORUBICIN_DN;GRAESSMANN_RESPONSE_TO_MC_AND_DOXORUBICIN_DN;GROSS_HYPOXIA_VIA_ELK3_AND_HIF1A_DN…	GO:0000280;GO:0006139;GO:0006259;GO:0006323;GO:0006807;GO:0006996;GO:0007067;GO:0007076;GO:0007165;GO:0008152;GO:0009987;GO:0016043;GO:0022402;GO:0022403;GO:0030261;GO:0034641;GO:0043170;GO:0044237;GO:0044238;GO:0044260;GO:0048285;GO:0050789;GO:0050794;GO:0050896;GO:0051276;GO:0051716;GO:0065007;GO:0071103;GO:0071840;GO:0071841;GO:0071842;GO:0090304	GO:0003676;GO:0003677;GO:0003690;GO:0005488;GO:0008270;GO:0043167;GO:0043169;GO:0043566;GO:0046872;GO:0046914	GO:0000793;GO:0001939;GO:0005634;GO:0005654;GO:0005694;GO:0005739;GO:0005794;GO:0016020;GO:0016363;GO:0043226;GO:0043227;GO:0043228;GO:0043229;GO:0043231;GO:0043232;GO:0044422;GO:0044424;GO:0044428;GO:0044444;GO:0044446;GO:0044464;GO:0045120		SM00355	5	5	5	13	13	13	76.107	0	17.091	143950000	25	24.1907	24.1059	24.7371	22.2882	20.9049	19.9579	23.2368	23.6447	23.9135	24.2968	22.9992	21.4618
	0.66551	0.423461		1.58555	-0.986325	AKP8L_HUMAN	AKP8L_HUMANA-kinaseanchorprotein8-like	Q9ULX6	AKP8L_HUMAN A-kinase anchor protein 8-like	AKAP8L	AKAP8L	NOG47695			binding;cation binding;DEAD/H-box RNA helicase binding;DNA binding;enzyme binding;ion binding;metal ion binding;nucleic acid binding;protein binding	cell part;cytoplasm;intracellular membrane-bounded organelle;intracellular organelle;intracellular organelle part;intracellular part;membrane-bounded organelle;nuclear matrix;nuclear part;nucleoplasm;nucleus;organelle;organelle part		BLALOCK_ALZHEIMERS_DISEASE_UP;BROWNE_HCMV_INFECTION_16HR_UP;BROWNE_HCMV_INFECTION_20HR_UP;BROWNE_HCMV_INFECTION_8HR_UP;BRUINS_UVC_RESPONSE_LATE;BUYTAERT_PHOTODYNAMIC_THERAPY_STRESS_UP;chr19p13;DIAZ_CHRONIC_MEYLOGENOUS_LEUKEMIA_UP;ENZYME_BINDING;GCCATNTTG_V$YY1_Q6;GOLDRATH_NAIVE_VS_EFF_CD8_TCELL_UP;GSE10239_NAIVE_VS_DAY4.5_EFF_CD8_TCELL_UP;GSE10239_NAIVE_VS_KLRG1HIGH_EFF_CD8_TCELL_UP;GSE10239_NAIV…		GO:0003676;GO:0003677;GO:0005488;GO:0005515;GO:0017151;GO:0019899;GO:0043167;GO:0043169;GO:0046872	GO:0005634;GO:0005654;GO:0005737;GO:0016363;GO:0043226;GO:0043227;GO:0043229;GO:0043231;GO:0044422;GO:0044424;GO:0044428;GO:0044446;GO:0044464		SM00355	11	11	11	20	20	20	71.639	0	31.52	549870000	61	25.8937	26.0228	25.8062	24.7502	24.2391	24.0158	26.2913	26.8373	25.8645	23.3801	23.0133	23.6527
	0.364306	-7.31382		0.0169106	0.540188	AKAP9_HUMAN	AKAP9_HUMANA-kinaseanchorprotein9	Q99996	AKAP9_HUMAN A-kinase anchor protein 9	AKAP9	AKAP9	NOG12793		anatomical structure development;biological regulation;cell communication;cell cycle;cell cycle process;cell development;cell-cell signaling;cellular chemical homeostasis;cellular component organization;cellular component organization at cellular level;cellular component organization or biogenesis;cellular component organization or biogenesis at cellular level;cellular developmental process;cellu…	binding;channel regulator activity;ion channel binding;potassium channel regulator activity;protein binding;protein complex scaffold;receptor binding;structural molecule activity	cation channel complex;cell part;centrosome;cytoplasmic part;cytoskeletal part;cytoskeleton;cytosol;Golgi apparatus;intracellular membrane-bounded organelle;intracellular non-membrane-bounded organelle;intracellular organelle;intracellular organelle part;intracellular part;ion channel complex;macromolecular complex;membrane part;membrane-bounded organelle;microtubule organizing center;microtubule…		AACTGGA,MIR-145;ACCATTT,MIR-522;ACTGAAA,MIR-30A-3P,MIR-30E-3P;AKL_HTLV1_INFECTION_DN;APPIERTO_RESPONSE_TO_FENRETINIDE_UP;BENPORATH_MYC_MAX_TARGETS;BIOCARTA_AKAPCENTROSOME_PATHWAY;BLALOCK_ALZHEIMERS_DISEASE_INCIPIENT_UP;BLALOCK_ALZHEIMERS_DISEASE_UP;BUYTAERT_PHOTODYNAMIC_THERAPY_STRESS_UP;CAGCTG_V$AP4_Q5;CELL_CELL_SIGNALING;CENTROSOME;chr7q21;CTTTGT_V$LEF1_Q2;CYTOPLASM;CYTOPLASMIC_PART;CYTOSKELETA…	GO:0000086;GO:0000278;GO:0001932;GO:0001934;GO:0003006;GO:0006810;GO:0006873;GO:0006937;GO:0006942;GO:0006996;GO:0007049;GO:0007154;GO:0007165;GO:0007267;GO:0007268;GO:0007276;GO:0007283;GO:0008016;GO:0009893;GO:0009987;GO:0010033;GO:0010562;GO:0010604;GO:0016043;GO:0019220;GO:0019222;GO:0019725;GO:0022402;GO:0022414;GO:0023052;GO:0031323;GO:0031325;GO:0031399;GO:0031401;GO:0032268;GO:0032270;GO:…	GO:0005102;GO:0005198;GO:0005488;GO:0005515;GO:0015459;GO:0016247;GO:0032947;GO:0044325	GO:0000242;GO:0005794;GO:0005813;GO:0005815;GO:0005829;GO:0005856;GO:0008076;GO:0032991;GO:0034702;GO:0034703;GO:0034705;GO:0043226;GO:0043227;GO:0043228;GO:0043229;GO:0043231;GO:0043232;GO:0043234;GO:0044422;GO:0044424;GO:0044425;GO:0044430;GO:0044444;GO:0044446;GO:0044450;GO:0044459;GO:0044464	REACT_15296;REACT_15364;REACT_15451;REACT_160315;REACT_20546;REACT_20594;REACT_20642;REACT_267965		15	15	15	5.2	5.2	5.2	452.98	0	30.692	176220000	19	23.4005	24.0744	24.6352	23.6288	20.1635	0.001	25.9408	0.001	24.2269	0.001	21.0886	24.3242
	1.17931	1.07633		0.0211336	0.642483	AKNA_HUMAN	AKNA_HUMANMicrotubuleorganizationproteinAKNA	Q7Z591	AKNA_HUMAN Microtubule organization protein AKNA	AKNA	AKNA	NOG73466		biological regulation;positive regulation of biological process;positive regulation of biosynthetic process;positive regulation of cellular biosynthetic process;positive regulation of cellular metabolic process;positive regulation of cellular process;positive regulation of gene expression;positive regulation of macromolecule biosynthetic process;positive regulation of macromolecule metabolic proc…	binding;core promoter proximal region DNA binding;core promoter proximal region sequence-specific DNA binding;DNA binding;nucleic acid binding;nucleic acid binding transcription factor activity;regulatory region DNA binding;regulatory region nucleic acid binding;RNA polymerase II core promoter proximal region sequence-specific DNA binding;RNA polymerase II core promoter proximal region sequence-s…	cell part;intracellular membrane-bounded organelle;intracellular organelle;intracellular part;membrane;membrane-bounded organelle;nucleus;organelle		ACEVEDO_METHYLATED_IN_LIVER_CANCER_DN;BHAT_ESR1_TARGETS_VIA_AKT1_UP;CHEN_METABOLIC_SYNDROM_NETWORK;chr9q32;chr9q33;CREIGHTON_ENDOCRINE_THERAPY_RESISTANCE_2;GARGALOVIC_RESPONSE_TO_OXIDIZED_PHOSPHOLIPIDS_BLUE_DN;GSE14000_TRANSLATED_RNA_VS_MRNA_16H_LPS_DC_UP;GSE14308_TH17_VS_NAIVE_CD4_TCELL_DN;GSE14308_TH17_VS_NATURAL_TREG_DN;GSE14308_TH2_VS_TH1_DN;GSE14308_TH2_VS_TH17_DN;GSE14769_UNSTIM_VS_120MIN_L…	GO:0006355;GO:0006357;GO:0009889;GO:0009891;GO:0009893;GO:0010468;GO:0010556;GO:0010557;GO:0010604;GO:0010628;GO:0019219;GO:0019222;GO:0031323;GO:0031325;GO:0031326;GO:0031328;GO:0045893;GO:0045935;GO:0045944;GO:0048518;GO:0048522;GO:0050789;GO:0050794;GO:0051171;GO:0051173;GO:0051252;GO:0051254;GO:0060255;GO:0065007;GO:0080090;GO:2000112	GO:0000975;GO:0000976;GO:0000977;GO:0000978;GO:0000981;GO:0000982;GO:0000987;GO:0001012;GO:0001067;GO:0001071;GO:0001077;GO:0001159;GO:0003676;GO:0003677;GO:0003700;GO:0005488;GO:0043565;GO:0044212	GO:0005634;GO:0016020;GO:0043226;GO:0043227;GO:0043229;GO:0043231;GO:0044424;GO:0044464			7	7	7	9.4	9.4	9.4	155.14	0	26.368	172450000	27	23.7623	23.8298	24.2794	20.7923	21.2378	0.001	25.5641	25.2803	24.2562	0.001	21.9965	21.9612
	2.69491	0.84674		1.41319	1.13796	AK1A1_HUMAN	AK1A1_HUMANAldo-ketoreductasefamily1memberA1	P14550	AK1A1_HUMAN Aldo-keto reductase family 1 member A1	AKR1A1	AKR1A1	COG0656	1.1.1.2	alcohol metabolic process;aldehyde catabolic process;biosynthetic process;carbohydrate catabolic process;carbohydrate metabolic process;carboxylic acid biosynthetic process;carboxylic acid catabolic process;carboxylic acid metabolic process;catabolic process;cellular aldehyde metabolic process;cellular biosynthetic process;cellular carbohydrate metabolic process;cellular catabolic process;cellula…	alcohol dehydrogenase (NADP+) activity;alditol:NADP+ 1-oxidoreductase activity;aldo-keto reductase (NADP) activity;catalytic activity;electron carrier activity;L-glucuronate reductase activity;oxidoreductase activity;oxidoreductase activity, acting on CH-OH group of donors;oxidoreductase activity, acting on the CH-OH group of donors, NAD or NADP as acceptor	apical plasma membrane;cell part;cytoplasmic part;cytosol;extracellular membrane-bounded organelle;extracellular organelle;extracellular region part;extracellular space;extracellular vesicular exosome;intracellular part;membrane part;membrane-bounded organelle;membrane-bounded vesicle;organelle;plasma membrane part;vesicle	Caprolactam degradation;Glycerolipid metabolism;Glycolysis / Gluconeogenesis	AAGCCAT,MIR-135A,MIR-135B;ALCOHOL_METABOLIC_PROCESS;ALDO_KETO_REDUCTASE_ACTIVITY;BAELDE_DIABETIC_NEPHROPATHY_UP;BENPORATH_MYC_TARGETS_WITH_EBOX;CARBOHYDRATE_METABOLIC_PROCESS;CELLULAR_CARBOHYDRATE_METABOLIC_PROCESS;CHEN_METABOLIC_SYNDROM_NETWORK;chr1p33;CHUNG_BLISTER_CYTOTOXICITY_UP;DAIRKEE_TERT_TARGETS_UP;DANG_BOUND_BY_MYC;ELECTRON_CARRIER_ACTIVITY;FARMER_BREAST_CANCER_APOCRINE_VS_BASAL;FARMER_B…	GO:0005975;GO:0005996;GO:0006006;GO:0006063;GO:0006064;GO:0006066;GO:0006081;GO:0006082;GO:0006766;GO:0006767;GO:0008152;GO:0009056;GO:0009058;GO:0009110;GO:0009987;GO:0016052;GO:0016053;GO:0016054;GO:0019318;GO:0019585;GO:0019752;GO:0019852;GO:0019853;GO:0032787;GO:0042180;GO:0042364;GO:0042839;GO:0042840;GO:0043436;GO:0044237;GO:0044238;GO:0044248;GO:0044249;GO:0044262;GO:0044281;GO:0044282;GO:…	GO:0003824;GO:0004032;GO:0004033;GO:0008106;GO:0009055;GO:0016491;GO:0016614;GO:0016616;GO:0047939	GO:0005615;GO:0005829;GO:0016324;GO:0031982;GO:0031988;GO:0043226;GO:0043227;GO:0043230;GO:0044421;GO:0044424;GO:0044425;GO:0044444;GO:0044459;GO:0044464;GO:0065010;GO:0070062			22	22	22	71.7	71.7	71.7	36.573	0	201.63	11045000000	500	29.8101	29.6761	29.8148	29.0305	28.0554	27.9285	30.8288	30.5396	30.4728	29.6604	29.5653	29.2025
	1.57322	0.654041		1.99886	-0.77579	ALDR_HUMAN;AK1BF_HUMAN	ALDR_HUMANAldo-ketoreductasefamily1memberB1	P15121	ALDR_HUMAN Aldo-keto reductase family 1 member B1	AKR1B1	AKR1B1	COG0656	1.1.1.21	alcohol biosynthetic process;alcohol metabolic process;biological regulation;biosynthetic process;C21-steroid hormone biosynthetic process;C21-steroid hormone metabolic process;carbohydrate biosynthetic process;carbohydrate metabolic process;cellular biosynthetic process;cellular carbohydrate biosynthetic process;cellular carbohydrate metabolic process;cellular hormone metabolic process;cellular …	alcohol dehydrogenase (NADP+) activity;alditol:NADP+ 1-oxidoreductase activity;aldo-keto reductase (NADP) activity;catalytic activity;electron carrier activity;glyceraldehyde oxidoreductase activity;oxidoreductase activity;oxidoreductase activity, acting on CH-OH group of donors;oxidoreductase activity, acting on the aldehyde or oxo group of donors;oxidoreductase activity, acting on the CH-OH gro…	cell part;cytoplasm;cytoplasmic part;cytosol;extracellular membrane-bounded organelle;extracellular organelle;extracellular region part;extracellular space;extracellular vesicular exosome;intracellular organelle part;intracellular part;membrane-bounded organelle;membrane-bounded vesicle;nuclear part;nucleoplasm;organelle;organelle part;vesicle	Fructose and mannose metabolism;Galactose metabolism;Glycerolipid metabolism;Pentose and glucuronate interconversions;Pyruvate metabolism	ALDO_KETO_REDUCTASE_ACTIVITY;BILD_E2F3_ONCOGENIC_SIGNATURE;BRUECKNER_TARGETS_OF_MIRLET7A3_DN;BYSTRYKH_HEMATOPOIESIS_STEM_CELL_QTL_TRANS;CARBOHYDRATE_METABOLIC_PROCESS;CASORELLI_ACUTE_PROMYELOCYTIC_LEUKEMIA_DN;CCAWYNNGAAR_UNKNOWN;CHARAFE_BREAST_CANCER_LUMINAL_VS_BASAL_DN;CHARAFE_BREAST_CANCER_LUMINAL_VS_MESENCHYMAL_DN;chr7q35;CTTTAAR_UNKNOWN;ELECTRON_CARRIER_ACTIVITY;ENK_UV_RESPONSE_KERATINOCYTE_U…	GO:0005975;GO:0005996;GO:0006000;GO:0006066;GO:0006629;GO:0006694;GO:0006700;GO:0006950;GO:0008152;GO:0008202;GO:0008207;GO:0008610;GO:0009058;GO:0009987;GO:0010817;GO:0016051;GO:0019318;GO:0019319;GO:0034637;GO:0034754;GO:0042445;GO:0042446;GO:0044237;GO:0044238;GO:0044249;GO:0044262;GO:0044281;GO:0044283;GO:0046165;GO:0046364;GO:0046370;GO:0050896;GO:0065007;GO:0065008	GO:0003824;GO:0004032;GO:0004033;GO:0008106;GO:0009055;GO:0016491;GO:0016614;GO:0016616;GO:0016903;GO:0043795	GO:0005615;GO:0005654;GO:0005737;GO:0005829;GO:0031982;GO:0031988;GO:0043226;GO:0043227;GO:0043230;GO:0044421;GO:0044422;GO:0044424;GO:0044428;GO:0044444;GO:0044446;GO:0044464;GO:0065010;GO:0070062	REACT_11038;REACT_355154		20	20	20	70.3	70.3	70.3	35.853	0	194.74	13875000000	697	30.322	30.3595	30.0706	29.9326	29.395	29.4895	31.1618	30.5883	30.9642	28.8697	28.768	28.852
	0.93056	14.7729		0.385749	-6.72282	AK1C3_HUMAN;AK1C4_HUMAN	AK1C3_HUMANAldo-ketoreductasefamily1memberC3;AK1C2_HUMANAldo-ketoreductasefamily1memberC2;AK1C1_HUMANAldo-ketoreductasefamily1memberC1	P42330;P52895;Q04828	AK1C3_HUMAN Aldo-keto reductase family 1 member C3;AK1C2_HUMAN Aldo-keto reductase family 1 member C2;AK1C1_HUMAN Aldo-keto reductase family 1 member C1	AKR1C3;AKR1C2;AKR1C1	AKR1C1;AKR1C2;AKR1C3	COG0656	1.-.-.-;1.1.1.-;1.1.1.112;1.1.1.149;1.1.1.188;1.1.1.239;1.1.1.357;1.1.1.64;1.3.1.20	alcohol catabolic process;alcohol metabolic process;anatomical structure development;androgen biosynthetic process;androgen metabolic process;apocarotenoid metabolic process;arachidonic acid metabolic process;bile acid and bile salt transport;bile acid metabolic process;biological regulation;biosynthetic process;C21-steroid hormone metabolic process;carboxylic acid metabolic process;carboxylic ac…	15-hydroxyprostaglandin-D dehydrogenase (NADP+) activity;17-alpha,20-alpha-dihydroxypregn-4-en-3-one dehydrogenase activity;alcohol dehydrogenase (NADP+) activity;alditol:NADP+ 1-oxidoreductase activity;aldo-keto reductase (NADP) activity;androsterone dehydrogenase (B-specific) activity;androsterone dehydrogenase activity;bile acid binding;binding;carboxylic acid binding;catalytic activity;delta4…	cell part;cytoplasm;cytoplasmic part;cytosol;extracellular membrane-bounded organelle;extracellular organelle;extracellular region part;extracellular vesicular exosome;intracellular;intracellular membrane-bounded organelle;intracellular organelle;intracellular part;membrane-bounded organelle;membrane-bounded vesicle;nucleus;organelle;vesicle	Arachidonic acid metabolism;Metabolism of xenobiotics by cytochrome P450;Steroid hormone biosynthesis	ACEVEDO_LIVER_TUMOR_VS_NORMAL_ADJACENT_TISSUE_UP;ACOSTA_PROLIFERATION_INDEPENDENT_MYC_TARGETS_DN;ADDYA_ERYTHROID_DIFFERENTIATION_BY_HEMIN;ALDO_KETO_REDUCTASE_ACTIVITY;BAELDE_DIABETIC_NEPHROPATHY_UP;BILE_ACID_METABOLIC_PROCESS;BLALOCK_ALZHEIMERS_DISEASE_UP;BLUM_RESPONSE_TO_SALIRASIB_DN;BOQUEST_STEM_CELL_CULTURED_VS_FRESH_UP;BOQUEST_STEM_CELL_UP;BROWNE_HCMV_INFECTION_16HR_DN;BRUINS_UVC_RESPONSE_VIA…	GO:0000038;GO:0000060;GO:0000302;GO:0001523;GO:0003006;GO:0003008;GO:0003014;GO:0006066;GO:0006081;GO:0006082;GO:0006461;GO:0006629;GO:0006631;GO:0006690;GO:0006692;GO:0006693;GO:0006694;GO:0006702;GO:0006714;GO:0006720;GO:0006721;GO:0006766;GO:0006775;GO:0006776;GO:0006805;GO:0006810;GO:0006869;GO:0006886;GO:0006950;GO:0006979;GO:0007154;GO:0007165;GO:0007166;GO:0007186;GO:0007584;GO:0007586;GO:…	GO:0001758;GO:0003824;GO:0004032;GO:0004033;GO:0004497;GO:0004745;GO:0005488;GO:0005496;GO:0008106;GO:0008289;GO:0016229;GO:0016491;GO:0016614;GO:0016616;GO:0016620;GO:0016627;GO:0016628;GO:0016651;GO:0016655;GO:0016705;GO:0016709;GO:0016903;GO:0018636;GO:0031406;GO:0032052;GO:0033293;GO:0033764;GO:0035410;GO:0035671;GO:0045550;GO:0045703;GO:0047006;GO:0047017;GO:0047020;GO:0047023;GO:0047035;GO:…	GO:0005622;GO:0005634;GO:0005737;GO:0005829;GO:0031982;GO:0031988;GO:0043226;GO:0043227;GO:0043229;GO:0043230;GO:0043231;GO:0044421;GO:0044424;GO:0044444;GO:0044464;GO:0065010;GO:0070062	REACT_11041;REACT_11048;REACT_11053;REACT_150149;REACT_24968;REACT_268561		4	4	4	18.3	18.3	18.3	36.853	0	8.029	31146000	10	0.001	0.001	0.001	22.7024	20.702	20.5866	20.9315	0.001	23.3892	21.6124	0.001	22.2091
	0.710405	0.658328		0.311562	-0.405701	ARK72_HUMAN;ARK73_HUMAN	ARK72_HUMANAflatoxinB1aldehydereductasemember2	O43488	ARK72_HUMAN Aflatoxin B1 aldehyde reductase member 2	AKR7A2	AKR7A2	COG0667	1.1.1.n11	carbohydrate metabolic process;cellular aldehyde metabolic process;cellular metabolic process;cellular process;metabolic process;primary metabolic process;small molecule metabolic process;xenobiotic metabolic process	alcohol dehydrogenase (NADP+) activity;alditol:NADP+ 1-oxidoreductase activity;aldo-keto reductase (NADP) activity;catalytic activity;electron carrier activity;epoxide hydrolase activity;ether hydrolase activity;hydrolase activity;hydrolase activity, acting on ether bonds;oxidoreductase activity;oxidoreductase activity, acting on CH-OH group of donors;oxidoreductase activity, acting on the CH-OH …	cell part;cytoplasmic part;cytosol;extracellular membrane-bounded organelle;extracellular organelle;extracellular region part;extracellular vesicular exosome;Golgi apparatus;intracellular membrane-bounded organelle;intracellular organelle;intracellular part;membrane-bounded organelle;membrane-bounded vesicle;mitochondrion;organelle;vesicle		ALDO_KETO_REDUCTASE_ACTIVITY;ALONSO_METASTASIS_UP;BENPORATH_MYC_MAX_TARGETS;BENPORATH_SUZ12_TARGETS;CAGCTG_V$AP4_Q5;CARBOHYDRATE_METABOLIC_PROCESS;CHICAS_RB1_TARGETS_SENESCENT;chr1p35;CUI_TCF21_TARGETS_2_UP;DANG_BOUND_BY_MYC;ELECTRON_CARRIER_ACTIVITY;FLECHNER_BIOPSY_KIDNEY_TRANSPLANT_REJECTED_VS_OK_DN;FULCHER_INFLAMMATORY_RESPONSE_LECTIN_VS_LPS_UP;GGGCGGR_V$SP1_Q6;GRADE_COLON_AND_RECTAL_CANCER_DN…	GO:0005975;GO:0006081;GO:0006805;GO:0008152;GO:0009987;GO:0044237;GO:0044238;GO:0044281	GO:0003824;GO:0004032;GO:0004033;GO:0004301;GO:0008106;GO:0009055;GO:0016491;GO:0016614;GO:0016616;GO:0016787;GO:0016801;GO:0016803;GO:0019118;GO:0019119	GO:0005739;GO:0005794;GO:0005829;GO:0031982;GO:0031988;GO:0043226;GO:0043227;GO:0043229;GO:0043230;GO:0043231;GO:0044421;GO:0044424;GO:0044444;GO:0044464;GO:0065010;GO:0070062	REACT_264461		12	12	12	39.6	39.6	39.6	39.589	0	187.29	3466400000	218	28.1323	28.14	28.5652	27.9305	26.666	26.6756	29.6918	28.7823	28.3384	26.4951	26.2393	27.3206
	2.48423	1.56112		0.81912	1.60042	AKT1_HUMAN	AKT1_HUMANRAC-alphaserine/threonine-proteinkinase	P31749	AKT1_HUMAN RAC-alpha serine/threonine-protein kinase	AKT1	AKT1	COG0515	2.7.11.1	activation-induced cell death of T cells;aging;alcohol metabolic process;amine metabolic process;aminoglycan metabolic process;anatomical structure development;apoptosis;apoptotic mitochondrial changes;biological regulation;biosynthetic process;blood coagulation;blood vessel development;carbohydrate biosynthetic process;carbohydrate homeostasis;carbohydrate metabolic process;carbohydrate transpor…	14-3-3 protein binding;adenyl nucleotide binding;adenyl ribonucleotide binding;ATP binding;binding;catalytic activity;enzyme binding;enzyme regulator activity;identical protein binding;kinase activity;lipid binding;nitric-oxide synthase regulator activity;nucleotide binding;phosphatidylinositol binding;phosphatidylinositol-3,4,5-trisphosphate binding;phosphatidylinositol-3,4-bisphosphate binding;…	cell junction;cell part;cell-cell junction;cytoplasm;cytoplasmic part;cytoskeletal part;cytoskeleton;cytosol;intracellular membrane-bounded organelle;intracellular non-membrane-bounded organelle;intracellular organelle;intracellular organelle part;intracellular part;membrane;membrane-bounded organelle;microtubule cytoskeleton;mitochondrion;non-membrane-bounded organelle;nuclear part;nucleoplasm;n…	Acute myeloid leukemia;Adipocytokine signaling pathway;Apoptosis;B cell receptor signaling pathway;Carbohydrate digestion and absorption;Chagas disease (American trypanosomiasis);Chemokine signaling pathway;Chronic myeloid leukemia;Colorectal cancer;Endometrial cancer;ErbB signaling pathway;Fc epsilon RI signaling pathway;Fc gamma R-mediated phagocytosis;Focal adhesion;Glioma;Hepatitis C;Insulin …	APOPTOSIS_GO;BILD_E2F3_ONCOGENIC_SIGNATURE;BIOCARTA_ACH_PATHWAY;BIOCARTA_AKT_PATHWAY;BIOCARTA_BAD_PATHWAY;BIOCARTA_BCELLSURVIVAL_PATHWAY;BIOCARTA_CHEMICAL_PATHWAY;BIOCARTA_CREB_PATHWAY;BIOCARTA_EDG1_PATHWAY;BIOCARTA_EIF4_PATHWAY;BIOCARTA_ERK5_PATHWAY;BIOCARTA_GCR_PATHWAY;BIOCARTA_GLEEVEC_PATHWAY;BIOCARTA_GSK3_PATHWAY;BIOCARTA_HCMV_PATHWAY;BIOCARTA_HDAC_PATHWAY;BIOCARTA_IGF1MTOR_PATHWAY;BIOCARTA_I…	GO:0000060;GO:0000079;GO:0000271;GO:0001558;GO:0001568;GO:0001649;GO:0001666;GO:0001775;GO:0001893;GO:0001932;GO:0001934;GO:0001936;GO:0001938;GO:0002028;GO:0002376;GO:0002682;GO:0002684;GO:0002694;GO:0002696;GO:0003006;GO:0005975;GO:0005976;GO:0005977;GO:0005978;GO:0005979;GO:0005996;GO:0006006;GO:0006022;GO:0006066;GO:0006073;GO:0006091;GO:0006109;GO:0006112;GO:0006139;GO:0006352;GO:0006355;GO:…	GO:0000166;GO:0003824;GO:0004672;GO:0004674;GO:0004712;GO:0005488;GO:0005515;GO:0005524;GO:0005543;GO:0005547;GO:0008289;GO:0016301;GO:0016740;GO:0016772;GO:0016773;GO:0017076;GO:0019899;GO:0030234;GO:0030235;GO:0030554;GO:0032553;GO:0032555;GO:0032559;GO:0035091;GO:0035639;GO:0042802;GO:0043325;GO:0071889	GO:0005634;GO:0005654;GO:0005737;GO:0005739;GO:0005819;GO:0005829;GO:0005856;GO:0005886;GO:0005911;GO:0015630;GO:0016020;GO:0030054;GO:0043226;GO:0043227;GO:0043228;GO:0043229;GO:0043231;GO:0043232;GO:0044422;GO:0044424;GO:0044428;GO:0044430;GO:0044444;GO:0044446;GO:0044464	REACT_111176;REACT_115662;REACT_12442;REACT_12447;REACT_12477;REACT_12564;REACT_13655;REACT_147867;REACT_15523;REACT_1695;REACT_19290;REACT_19358;REACT_19405;REACT_24915;REACT_25042;REACT_263991;REACT_264178;REACT_355377;REACT_355468;REACT_549;REACT_75829	SM00133;SM00220;SM00233	12	12	9	35.4	35.4	26	55.686	0	64.974	765680000	75	25.4689	25.2588	25.6156	25.5637	23.1705	22.8808	27.1856	26.5604	27.2807	26.035	24.9664	25.415
	2.50636	1.89852		0.740729	1.56352	AKT2_HUMAN	AKT2_HUMANRAC-betaserine/threonine-proteinkinase	P31751	AKT2_HUMAN RAC-beta serine/threonine-protein kinase	AKT2	AKT2	COG0515	2.7.11.1	alcohol metabolic process;apoptosis;biological regulation;biosynthetic process;carbohydrate biosynthetic process;carbohydrate metabolic process;carbohydrate transport;cell death;cell differentiation;cell surface receptor linked signaling pathway;cellular biosynthetic process;cellular carbohydrate biosynthetic process;cellular carbohydrate metabolic process;cellular component organization;cellular…	adenyl nucleotide binding;adenyl ribonucleotide binding;ATP binding;binding;catalytic activity;kinase activity;nucleotide binding;phosphotransferase activity, alcohol group as acceptor;protein kinase activity;protein serine/threonine kinase activity;purine nucleotide binding;purine ribonucleoside triphosphate binding;purine ribonucleotide binding;ribonucleotide binding;transferase activity;transf…	cell cortex;cell part;cell projection membrane;cell projection part;cytoplasmic part;cytosol;intracellular membrane-bounded organelle;intracellular organelle;intracellular organelle part;intracellular part;leading edge membrane;membrane;membrane part;membrane-bounded organelle;nuclear part;nucleoplasm;nucleus;organelle;organelle part;plasma membrane;plasma membrane part;ruffle membrane	Acute myeloid leukemia;Adipocytokine signaling pathway;Apoptosis;B cell receptor signaling pathway;Carbohydrate digestion and absorption;Chagas disease (American trypanosomiasis);Chemokine signaling pathway;Chronic myeloid leukemia;Colorectal cancer;Endometrial cancer;ErbB signaling pathway;Fc epsilon RI signaling pathway;Fc gamma R-mediated phagocytosis;Focal adhesion;Glioma;Hepatitis C;Insulin …	BANDRES_RESPONSE_TO_CARMUSTIN_MGMT_48HR_DN;BIOPOLYMER_METABOLIC_PROCESS;BIOPOLYMER_MODIFICATION;CAGCTG_V$AP4_Q5;CAGNYGKNAAA_UNKNOWN;CAHOY_ASTROCYTIC;CELLULAR_MACROMOLECULE_METABOLIC_PROCESS;CELLULAR_PROTEIN_METABOLIC_PROCESS;chr19q13;CTGCAGY_UNKNOWN;CTTTGA_V$LEF1_Q2;DANG_REGULATED_BY_MYC_DN;DELASERNA_MYOD_TARGETS_UP;DOANE_RESPONSE_TO_ANDROGEN_UP;GCGNNANTTCC_UNKNOWN;GGGCGGR_V$SP1_Q6;GRESHOCK_CANCE…	GO:0000271;GO:0001932;GO:0001934;GO:0005975;GO:0005976;GO:0005977;GO:0005978;GO:0005979;GO:0005996;GO:0006006;GO:0006066;GO:0006073;GO:0006091;GO:0006109;GO:0006112;GO:0006417;GO:0006464;GO:0006810;GO:0006886;GO:0006915;GO:0007009;GO:0007165;GO:0007166;GO:0007167;GO:0007169;GO:0008104;GO:0008152;GO:0008219;GO:0008286;GO:0008643;GO:0009058;GO:0009059;GO:0009250;GO:0009719;GO:0009725;GO:0009889;GO:…	GO:0000166;GO:0003824;GO:0004672;GO:0004674;GO:0005488;GO:0005524;GO:0016301;GO:0016740;GO:0016772;GO:0016773;GO:0017076;GO:0030554;GO:0032553;GO:0032555;GO:0032559;GO:0035639	GO:0005634;GO:0005654;GO:0005829;GO:0005886;GO:0005938;GO:0016020;GO:0031253;GO:0031256;GO:0032587;GO:0043226;GO:0043227;GO:0043229;GO:0043231;GO:0044422;GO:0044424;GO:0044425;GO:0044428;GO:0044444;GO:0044446;GO:0044459;GO:0044463;GO:0044464	REACT_115662;REACT_12442;REACT_12447;REACT_12564;REACT_13655;REACT_1451;REACT_147867;REACT_1695;REACT_19290;REACT_19358;REACT_19405;REACT_263991;REACT_264178;REACT_355377;REACT_355468;REACT_549;REACT_6743;REACT_75829;REACT_790	SM00133;SM00220;SM00233	10	8	8	28.3	22.2	22.2	55.768	0	34.539	611470000	56	24.8447	24.6095	25.0085	24.7752	22.7098	22.994	27.0303	26.1717	26.9562	24.7604	23.9824	26.4268
	0.346856	9.36571		0.85062	-13.9443	AKTIP_HUMAN	AKTIP_HUMANAKT-interactingprotein	Q9H8T0	AKTIP_HUMAN AKT-interacting protein	AKTIP	AKTIP	NOG285076		apoptosis;biological regulation;cell death;cellular component organization;cellular component organization at cellular level;cellular component organization or biogenesis;cellular component organization or biogenesis at cellular level;cellular macromolecule metabolic process;cellular metabolic process;cellular process;cellular protein metabolic process;death;early endosome to late endosome transp…	acid-amino acid ligase activity;binding;catalytic activity;enzyme binding;ligase activity;ligase activity, forming carbon-nitrogen bonds;protein binding;small conjugating protein ligase activity;ubiquitin protein ligase binding	cell part;cytoplasm;cytoplasmic part;FHF complex;Golgi apparatus;intracellular membrane-bounded organelle;intracellular non-membrane-bounded organelle;intracellular organelle;intracellular organelle part;intracellular part;macromolecular complex;membrane;membrane-bounded organelle;non-membrane-bounded organelle;nuclear part;nucleolus;organelle;organelle part;plasma membrane;protein complex		AACGGTT,MIR-451;BIOPOLYMER_METABOLIC_PROCESS;BIOPOLYMER_MODIFICATION;BLALOCK_ALZHEIMERS_DISEASE_DN;BOCHKIS_FOXA2_TARGETS;BURTON_ADIPOGENESIS_11;BYSTRYKH_HEMATOPOIESIS_STEM_CELL_QTL_TRANS;CAGGTG_V$E12_Q6;CELLULAR_MACROMOLECULE_METABOLIC_PROCESS;CELLULAR_PROTEIN_METABOLIC_PROCESS;chr16q12;COLDREN_GEFITINIB_RESISTANCE_DN;CREIGHTON_ENDOCRINE_THERAPY_RESISTANCE_5;CTTTAAR_UNKNOWN;CTTTGA_V$LEF1_Q2;DAVIC…	GO:0001932;GO:0001934;GO:0006464;GO:0006810;GO:0006915;GO:0006996;GO:0007032;GO:0007033;GO:0007034;GO:0007040;GO:0007041;GO:0008152;GO:0008219;GO:0008333;GO:0009893;GO:0009987;GO:0010562;GO:0010604;GO:0012501;GO:0015031;GO:0016043;GO:0016192;GO:0016197;GO:0016265;GO:0016567;GO:0019220;GO:0019222;GO:0019538;GO:0031323;GO:0031325;GO:0031399;GO:0031401;GO:0032092;GO:0032268;GO:0032270;GO:0032446;GO:…	GO:0003824;GO:0005488;GO:0005515;GO:0016874;GO:0016879;GO:0016881;GO:0019787;GO:0019899;GO:0031625	GO:0005730;GO:0005737;GO:0005794;GO:0005886;GO:0016020;GO:0032991;GO:0043226;GO:0043227;GO:0043228;GO:0043229;GO:0043231;GO:0043232;GO:0043234;GO:0044422;GO:0044424;GO:0044428;GO:0044444;GO:0044446;GO:0044464;GO:0070695			2	2	2	15.1	15.1	15.1	33.128	0	14.585	102010000	3	0.001	22.2349	0.001	22.8497	20.9439	20.8024	25.5883	0.001	24.7447	0.001	0.001	22.7611
	0.325648	-0.373325		0.218808	0.457141	HEM2_HUMAN	HEM2_HUMANDelta-aminolevulinicaciddehydratase	P13716	HEM2_HUMAN Delta-aminolevulinic acid dehydratase	ALAD	ALAD	COG0113	4.2.1.24	biosynthetic process;cellular aromatic compound metabolic process;cellular biosynthetic process;cellular component assembly;cellular component organization;cellular component organization or biogenesis;cellular metabolic process;cellular nitrogen compound biosynthetic process;cellular nitrogen compound metabolic process;cellular process;cellular response to chemical stimulus;cellular response to …	binding;carbon-oxygen lyase activity;catalytic activity;cation binding;hydro-lyase activity;identical protein binding;ion binding;lead ion binding;lyase activity;metal ion binding;porphobilinogen synthase activity;protein binding;transition metal ion binding;zinc ion binding	cell part;cytoplasmic part;cytosol;extracellular membrane-bounded organelle;extracellular organelle;extracellular region part;extracellular vesicular exosome;intracellular membrane-bounded organelle;intracellular organelle;intracellular part;membrane-bounded organelle;membrane-bounded vesicle;nucleus;organelle;vesicle	Porphyrin and chlorophyll metabolism	ABE_VEGFA_TARGETS_30MIN;BANDRES_RESPONSE_TO_CARMUSTIN_MGMT_48HR_DN;BHAT_ESR1_TARGETS_NOT_VIA_AKT1_DN;BHAT_ESR1_TARGETS_VIA_AKT1_DN;BIOCARTA_AHSP_PATHWAY;BIOSYNTHETIC_PROCESS;BOYAULT_LIVER_CANCER_SUBCLASS_G3_DN;BURTON_ADIPOGENESIS_6;BYSTRYKH_HEMATOPOIESIS_STEM_CELL_AND_BRAIN_QTL_CIS;BYSTRYKH_HEMATOPOIESIS_STEM_CELL_QTL_CIS;CARBON_OXYGEN_LYASE_ACTIVITY;CELLULAR_BIOSYNTHETIC_PROCESS;CHESLER_BRAIN_HI…	GO:0006461;GO:0006725;GO:0006778;GO:0006779;GO:0006782;GO:0006783;GO:0006807;GO:0008152;GO:0009058;GO:0009987;GO:0010033;GO:0016043;GO:0018130;GO:0022607;GO:0033013;GO:0033014;GO:0034097;GO:0034641;GO:0042168;GO:0042221;GO:0042440;GO:0043933;GO:0044237;GO:0044249;GO:0044271;GO:0044281;GO:0046148;GO:0046483;GO:0046501;GO:0050896;GO:0051186;GO:0051188;GO:0051259;GO:0051260;GO:0051716;GO:0065003;GO:…	GO:0003824;GO:0004655;GO:0005488;GO:0005515;GO:0008270;GO:0016829;GO:0016835;GO:0016836;GO:0032791;GO:0042802;GO:0043167;GO:0043169;GO:0046872;GO:0046914	GO:0005634;GO:0005829;GO:0031982;GO:0031988;GO:0043226;GO:0043227;GO:0043229;GO:0043230;GO:0043231;GO:0044421;GO:0044424;GO:0044444;GO:0044464;GO:0065010;GO:0070062	REACT_9465	SM01004	12	12	12	39.4	39.4	39.4	36.294	0	46.738	1527100000	125	27.44	27.6222	27.5738	26.8991	25.0924	24.8739	28.0936	26.8526	26.5699	26.9861	25.2601	25.9906
	0	0		0.427243	7.93555	CD166_HUMAN	CD166_HUMANCD166antigen	Q13740	CD166_HUMAN CD166 antigen	ALCAM	ALCAM	NOG148902		axon guidance;biological adhesion;biological regulation;cell adhesion;cellular process;cellular response to stimulus;chemotaxis;locomotion;motor axon guidance;regulation of biological process;regulation of cellular process;response to chemical stimulus;response to external stimulus;response to stimulus;signal transduction;taxis	binding;protein binding;receptor binding	adherens junction;anchoring junction;axon;cell body;cell junction;cell part;cell projection;cell-substrate adherens junction;cell-substrate junction;external side of plasma membrane;extracellular membrane-bounded organelle;extracellular organelle;extracellular region part;extracellular vesicular exosome;focal adhesion;integral to membrane;intrinsic to membrane;membrane part;membrane-bounded organ…	Cell adhesion molecules (CAMs)	AAAGACA,MIR-511;AACTGAC,MIR-223;AACTTT_UNKNOWN;AACWWCAANK_UNKNOWN;ABBUD_LIF_SIGNALING_1_DN;ACCAAAG,MIR-9;ACEVEDO_NORMAL_TISSUE_ADJACENT_TO_LIVER_TUMOR_UP;ACTGCCT,MIR-34B;ACTTTAT,MIR-142-5P;AFFAR_YY1_TARGETS_UP;BENPORATH_NANOG_TARGETS;BENPORATH_SOX2_TARGETS;BERENJENO_TRANSFORMED_BY_RHOA_REVERSIBLY_DN;BERENJENO_TRANSFORMED_BY_RHOA_UP;BOQUEST_STEM_CELL_CULTURED_VS_FRESH_UP;BORLAK_LIVER_CANCER_EGF_UP…	GO:0006935;GO:0007155;GO:0007165;GO:0007411;GO:0008045;GO:0009605;GO:0009987;GO:0022610;GO:0040011;GO:0042221;GO:0042330;GO:0050789;GO:0050794;GO:0050896;GO:0051716;GO:0065007	GO:0005102;GO:0005488;GO:0005515	GO:0005912;GO:0005924;GO:0005925;GO:0009897;GO:0016021;GO:0030054;GO:0030055;GO:0030424;GO:0031224;GO:0031982;GO:0031988;GO:0042995;GO:0043005;GO:0043025;GO:0043226;GO:0043227;GO:0043230;GO:0044297;GO:0044421;GO:0044425;GO:0044459;GO:0044464;GO:0065010;GO:0070062;GO:0070161	REACT_22205	SM00409	2	2	2	6.5	6.5	6.5	65.102	0.0049145	2.1279	14683000	2	0.001	0.001	0.001	0.001	0.001	0.001	0.001	0.001	0.001	23.8076	0.001	0.001
	1.01533	-0.44942		0.00904395	0.00809733	A16A1_HUMAN	A16A1_HUMANAldehydedehydrogenasefamily16memberA1	Q8IZ83	A16A1_HUMAN Aldehyde dehydrogenase family 16 member A1	ALDH16A1	ALDH16A1	COG1012			aldehyde dehydrogenase (NAD) activity;catalytic activity;oxidoreductase activity;oxidoreductase activity, acting on the aldehyde or oxo group of donors;oxidoreductase activity, acting on the aldehyde or oxo group of donors, NAD or NADP as acceptor	cell part;extracellular membrane-bounded organelle;extracellular organelle;extracellular region part;extracellular vesicular exosome;membrane;membrane-bounded organelle;membrane-bounded vesicle;organelle;vesicle		chr19q13;CUI_TCF21_TARGETS_2_UP;FORTSCHEGGER_PHF8_TARGETS_DN;GARY_CD5_TARGETS_UP;GGGYGTGNY_UNKNOWN;GOBERT_OLIGODENDROCYTE_DIFFERENTIATION_UP;GSE11924_TH2_VS_TH17_CD4_TCELL_UP;GSE15659_CD45RA_NEG_CD4_TCELL_VS_NONSUPPRESSIVE_TCELL_UP;GSE15659_CD45RA_NEG_CD4_TCELL_VS_RESTING_TREG_UP;GSE15659_NAIVE_CD4_TCELL_VS_NONSUPPRESSIVE_TCELL_UP;GSE15659_NAIVE_CD4_TCELL_VS_RESTING_TREG_UP;GSE15659_NAIVE_VS_PTPR…		GO:0003824;GO:0004029;GO:0016491;GO:0016620;GO:0016903	GO:0016020;GO:0031982;GO:0031988;GO:0043226;GO:0043227;GO:0043230;GO:0044421;GO:0044464;GO:0065010;GO:0070062			16	16	16	26.7	26.7	26.7	85.126	0	131.41	1775700000	186	27.8513	27.9258	27.7819	26.4939	26.4112	25.9768	27.6849	27.0081	27.5177	25.8078	26.5405	26.5578
	2.83879	3.01449		1.7942	2.98361	P5CS_HUMAN	P5CS_HUMANDelta-1-pyrroline-5-carboxylatesynthase	P54886	P5CS_HUMAN Delta-1-pyrroline-5-carboxylate synthase	ALDH18A1	ALDH18A1	COG0014	1.2.1.41;2.7.2.11	amine biosynthetic process;amine metabolic process;biosynthetic process;carboxylic acid biosynthetic process;carboxylic acid metabolic process;cellular amine metabolic process;cellular amino acid biosynthetic process;cellular amino acid metabolic process;cellular biosynthetic process;cellular ketone metabolic process;cellular metabolic process;cellular modified amino acid biosynthetic process;cel…	adenyl nucleotide binding;adenyl ribonucleotide binding;amino acid kinase activity;ATP binding;binding;catalytic activity;coenzyme binding;cofactor binding;glutamate 5-kinase activity;glutamate-5-semialdehyde dehydrogenase activity;kinase activity;NADP binding;nucleotide binding;oxidoreductase activity;oxidoreductase activity, acting on the aldehyde or oxo group of donors;oxidoreductase activity,…	cell part;cytoplasm;cytoplasmic part;intracellular membrane-bounded organelle;intracellular organelle;intracellular organelle part;intracellular part;membrane;membrane-bounded organelle;mitochondrial inner membrane;mitochondrial membrane;mitochondrial part;mitochondrion;organelle;organelle inner membrane;organelle membrane;organelle part	Arginine and proline metabolism	ACEVEDO_FGFR1_TARGETS_IN_PROSTATE_CANCER_MODEL_DN;AFFAR_YY1_TARGETS_DN;AMINE_BIOSYNTHETIC_PROCESS;AMINE_METABOLIC_PROCESS;AMINO_ACID_AND_DERIVATIVE_METABOLIC_PROCESS;AMINO_ACID_METABOLIC_PROCESS;BENPORATH_MYC_MAX_TARGETS;BIOSYNTHETIC_PROCESS;CACGTG_V$MYC_Q2;CAIRO_HEPATOBLASTOMA_CLASSES_UP;CARBOXYLIC_ACID_METABOLIC_PROCESS;CELLULAR_BIOSYNTHETIC_PROCESS;CHEN_METABOLIC_SYNDROM_NETWORK;chr10q24;CTCNA…	GO:0000052;GO:0006082;GO:0006520;GO:0006536;GO:0006560;GO:0006561;GO:0006575;GO:0006591;GO:0006592;GO:0006807;GO:0008152;GO:0008652;GO:0009058;GO:0009064;GO:0009084;GO:0009308;GO:0009309;GO:0009987;GO:0016053;GO:0018130;GO:0019240;GO:0019752;GO:0034641;GO:0042180;GO:0042398;GO:0043436;GO:0044106;GO:0044237;GO:0044238;GO:0044249;GO:0044271;GO:0044281;GO:0044283;GO:0046394;GO:0046483;GO:0055129	GO:0000166;GO:0003824;GO:0004349;GO:0004350;GO:0005488;GO:0005524;GO:0016301;GO:0016491;GO:0016620;GO:0016740;GO:0016772;GO:0016774;GO:0016903;GO:0017076;GO:0019202;GO:0030554;GO:0032553;GO:0032555;GO:0032559;GO:0035639;GO:0048037;GO:0050661;GO:0050662	GO:0005737;GO:0005739;GO:0005743;GO:0016020;GO:0019866;GO:0031090;GO:0031966;GO:0043226;GO:0043227;GO:0043229;GO:0043231;GO:0044422;GO:0044424;GO:0044429;GO:0044444;GO:0044446;GO:0044464	REACT_238		24	24	24	40.3	40.3	40.3	87.301	0	102.32	2157000000	140	25.6669	26.017	25.2558	25.8294	24.1159	23.4876	28.0762	28.7413	29.1657	27.9303	27.0513	27.4021
	0.839573	0.427277		0.262827	0.482627	AL1B1_HUMAN;AL1A3_HUMAN	AL1B1_HUMANAldehydedehydrogenaseX,mitochondrial	P30837	AL1B1_HUMAN Aldehyde dehydrogenase X, mitochondrial	ALDH1B1	ALDH1B1	COG1012	1.2.1.3	alcohol catabolic process;alcohol metabolic process;carbohydrate metabolic process;catabolic process;ethanol catabolic process;ethanol metabolic process;metabolic process;primary alcohol catabolic process;primary alcohol metabolic process;primary metabolic process;small molecule catabolic process;small molecule metabolic process	aldehyde dehydrogenase (NAD) activity;catalytic activity;oxidoreductase activity;oxidoreductase activity, acting on the aldehyde or oxo group of donors;oxidoreductase activity, acting on the aldehyde or oxo group of donors, NAD or NADP as acceptor	cell part;cytoplasmic part;intracellular membrane-bounded organelle;intracellular organelle;intracellular organelle lumen;intracellular organelle part;intracellular part;membrane-bounded organelle;membrane-enclosed lumen;mitochondrial matrix;mitochondrial part;mitochondrion;nuclear part;nucleoplasm;organelle;organelle lumen;organelle part	Arginine and proline metabolism;Ascorbate and aldarate metabolism;beta-Alanine metabolism;Chloroalkane and chloroalkene degradation;Fatty acid metabolism;Glycerolipid metabolism;Glycolysis / Gluconeogenesis;Histidine metabolism;Limonene and pinene degradation;Lysine degradation;Pentose and glucuronate interconversions;Propanoate metabolism;Pyruvate metabolism;Tryptophan metabolism;Valine, leucine…	BILD_MYC_ONCOGENIC_SIGNATURE;BROWNE_HCMV_INFECTION_4HR_DN;BRUINS_UVC_RESPONSE_VIA_TP53_GROUP_D;BUYTAERT_PHOTODYNAMIC_THERAPY_STRESS_DN;CAIRO_LIVER_DEVELOPMENT_DN;CHEN_METABOLIC_SYNDROM_NETWORK;chr9p13;COLDREN_GEFITINIB_RESISTANCE_UP;DACOSTA_UV_RESPONSE_VIA_ERCC3_UP;DACOSTA_UV_RESPONSE_VIA_ERCC3_XPCS_UP;DEBIASI_APOPTOSIS_BY_REOVIRUS_INFECTION_DN;DELYS_THYROID_CANCER_DN;FURUKAWA_DUSP6_TARGETS_PCI35…	GO:0005975;GO:0006066;GO:0006067;GO:0006068;GO:0008152;GO:0009056;GO:0034308;GO:0034310;GO:0044238;GO:0044281;GO:0044282;GO:0046164	GO:0003824;GO:0004029;GO:0016491;GO:0016620;GO:0016903	GO:0005654;GO:0005739;GO:0005759;GO:0031974;GO:0043226;GO:0043227;GO:0043229;GO:0043231;GO:0043233;GO:0044422;GO:0044424;GO:0044428;GO:0044429;GO:0044444;GO:0044446;GO:0044464;GO:0070013			12	12	11	32.7	32.7	31.1	57.206	0	44.677	570690000	72	25.4793	25.9759	26.2511	24.86	23.7484	23.0089	26.4389	26.3478	26.2015	24.6617	23.3826	25.0209
+	6.51145	-22.5992		0.383352	-6.82916	ALDH2_HUMAN;F8VP50_HUMAN	ALDH2_HUMANAldehydedehydrogenase,mitochondrial;F8VP50_HUMANUncharacterizedprotein(Fragment)	P05091;F8VP50	ALDH2_HUMAN Aldehyde dehydrogenase, mitochondrial;F8VP50_HUMAN Uncharacterized protein (Fragment)	ALDH2	ALDH2	COG1012	1.2.1.3	alcohol catabolic process;alcohol metabolic process;biological regulation;biosynthetic process;carbohydrate metabolic process;catabolic process;cell communication;cell-cell signaling;cellular biosynthetic process;cellular metabolic process;cellular process;ethanol catabolic process;ethanol metabolic process;ethanol oxidation;metabolic process;neurotransmitter biosynthetic process;neurotransmitter…	aldehyde dehydrogenase (NAD) activity;aldehyde dehydrogenase [NAD(P)+] activity;catalytic activity;electron carrier activity;oxidoreductase activity;oxidoreductase activity, acting on the aldehyde or oxo group of donors;oxidoreductase activity, acting on the aldehyde or oxo group of donors, NAD or NADP as acceptor	cell part;cytoplasmic part;extracellular membrane-bounded organelle;extracellular organelle;extracellular region part;extracellular vesicular exosome;intracellular organelle lumen;intracellular organelle part;intracellular part;membrane-bounded organelle;membrane-bounded vesicle;membrane-enclosed lumen;mitochondrial matrix;mitochondrial part;organelle;organelle lumen;organelle part;vesicle	Arginine and proline metabolism;Ascorbate and aldarate metabolism;beta-Alanine metabolism;Chloroalkane and chloroalkene degradation;Fatty acid metabolism;Glycerolipid metabolism;Glycolysis / Gluconeogenesis;Histidine metabolism;Limonene and pinene degradation;Lysine degradation;Pentose and glucuronate interconversions;Propanoate metabolism;Pyruvate metabolism;Tryptophan metabolism;Valine, leucine…	ACEVEDO_LIVER_CANCER_DN;ALCOHOL_METABOLIC_PROCESS;BENPORATH_MYC_TARGETS_WITH_EBOX;BERENJENO_ROCK_SIGNALING_NOT_VIA_RHOA_UP;BLALOCK_ALZHEIMERS_DISEASE_DN;BLALOCK_ALZHEIMERS_DISEASE_INCIPIENT_DN;CAIRO_HEPATOBLASTOMA_CLASSES_DN;CAIRO_HEPATOBLASTOMA_POOR_SURVIVAL;CARBOHYDRATE_METABOLIC_PROCESS;CHIARADONNA_NEOPLASTIC_TRANSFORMATION_CDC25_DN;chr12q24;COLINA_TARGETS_OF_4EBP1_AND_4EBP2;DANG_BOUND_BY_MYC;…	GO:0001505;GO:0005975;GO:0006066;GO:0006067;GO:0006068;GO:0006069;GO:0006805;GO:0007154;GO:0007267;GO:0007268;GO:0008152;GO:0009056;GO:0009058;GO:0009987;GO:0023052;GO:0034308;GO:0034310;GO:0042133;GO:0042136;GO:0044237;GO:0044238;GO:0044249;GO:0044281;GO:0044282;GO:0046164;GO:0055114;GO:0065007;GO:0065008	GO:0003824;GO:0004029;GO:0004030;GO:0009055;GO:0016491;GO:0016620;GO:0016903	GO:0005759;GO:0031974;GO:0031982;GO:0031988;GO:0043226;GO:0043227;GO:0043230;GO:0043233;GO:0044421;GO:0044422;GO:0044424;GO:0044429;GO:0044444;GO:0044446;GO:0044464;GO:0065010;GO:0070013;GO:0070062	REACT_15532;REACT_34		5	4	4	16.4	14.9	14.9	56.381	0	7.7475	61125000	6	22.5882	23.1956	22.0169	24.0388	18.8546	20.3847	0.001	0.001	0.001	24.3604	0.001	18.4291
	0.313838	0.233301		0.469237	-1.18822	AL3A2_HUMAN;AL3B1_HUMAN	AL3A2_HUMANAldehydedehydrogenasefamily3memberA2	P51648	AL3A2_HUMAN Aldehyde dehydrogenase family 3 member A2	ALDH3A2	ALDH3A2	COG1012	1.2.1.3	alcohol metabolic process;anatomical structure development;cellular aldehyde metabolic process;cellular lipid metabolic process;cellular metabolic process;cellular process;central nervous system development;developmental process;epidermis development;isoprenoid metabolic process;lipid metabolic process;metabolic process;oxidation-reduction process;peripheral nervous system development;phytol meta…	3-chloroallyl aldehyde dehydrogenase activity;aldehyde dehydrogenase (NAD) activity;aldehyde dehydrogenase [NAD(P)+] activity;catalytic activity;long-chain-alcohol oxidase activity;long-chain-aldehyde dehydrogenase activity;oxidoreductase activity;oxidoreductase activity, acting on CH-OH group of donors;oxidoreductase activity, acting on the aldehyde or oxo group of donors;oxidoreductase activity…	cell part;cytoplasmic part;endoplasmic reticulum membrane;endoplasmic reticulum part;extracellular membrane-bounded organelle;extracellular organelle;extracellular region part;extracellular vesicular exosome;integral to membrane;intracellular membrane-bounded organelle;intracellular organelle;intracellular organelle part;intracellular part;intrinsic to membrane;membrane;membrane part;membrane-bou…	Arginine and proline metabolism;Ascorbate and aldarate metabolism;beta-Alanine metabolism;Chloroalkane and chloroalkene degradation;Fatty acid metabolism;Glycerolipid metabolism;Glycolysis / Gluconeogenesis;Histidine metabolism;Limonene and pinene degradation;Lysine degradation;Pentose and glucuronate interconversions;Propanoate metabolism;Pyruvate metabolism;Tryptophan metabolism;Valine, leucine…	ANATOMICAL_STRUCTURE_DEVELOPMENT;BARRIER_CANCER_RELAPSE_NORMAL_SAMPLE_UP;BLALOCK_ALZHEIMERS_DISEASE_UP;BRUINS_UVC_RESPONSE_VIA_TP53_GROUP_B;BYSTRYKH_HEMATOPOIESIS_STEM_CELL_QTL_TRANS;CAIRO_HEPATOBLASTOMA_CLASSES_DN;CAIRO_LIVER_DEVELOPMENT_DN;CENTRAL_NERVOUS_SYSTEM_DEVELOPMENT;CHARAFE_BREAST_CANCER_LUMINAL_VS_BASAL_DN;CHEMNITZ_RESPONSE_TO_PROSTAGLANDIN_E2_DN;CHIANG_LIVER_CANCER_SUBCLASS_CTNNB1_UP;…	GO:0006066;GO:0006081;GO:0006629;GO:0006714;GO:0006720;GO:0006721;GO:0007417;GO:0007422;GO:0008152;GO:0008544;GO:0009888;GO:0009987;GO:0032502;GO:0033306;GO:0042214;GO:0044237;GO:0044238;GO:0044255;GO:0044281;GO:0048731;GO:0048856;GO:0051761;GO:0055114	GO:0003824;GO:0004028;GO:0004029;GO:0004030;GO:0016491;GO:0016614;GO:0016620;GO:0016899;GO:0016903;GO:0046577;GO:0050061	GO:0005743;GO:0005777;GO:0005789;GO:0016020;GO:0016021;GO:0019866;GO:0031090;GO:0031224;GO:0031966;GO:0031982;GO:0031988;GO:0042579;GO:0043226;GO:0043227;GO:0043229;GO:0043230;GO:0043231;GO:0044421;GO:0044422;GO:0044424;GO:0044425;GO:0044429;GO:0044432;GO:0044444;GO:0044446;GO:0044464;GO:0065010;GO:0070062			11	11	11	35.7	35.7	35.7	54.847	0	15.701	316410000	47	24.7794	25.7933	25.0998	24.0783	23.2545	22.5224	25.5633	25.3992	25.4098	23.9397	20.502	21.8488
	3.79559	2.06474		1.70647	1.16516	SSDH_HUMAN	SSDH_HUMANSuccinate-semialdehydedehydrogenase,mitochondrial	P51649	SSDH_HUMAN Succinate-semialdehyde dehydrogenase, mitochondrial	ALDH5A1	ALDH5A1	COG1012	1.2.1.24	acetate metabolic process;alcohol metabolic process;amine catabolic process;amine metabolic process;anatomical structure development;biological regulation;carbohydrate metabolic process;carboxylic acid catabolic process;carboxylic acid metabolic process;catabolic process;cell communication;cell-cell signaling;cellular amine metabolic process;cellular amino acid catabolic process;cellular amino ac…	aldehyde dehydrogenase (NAD) activity;binding;catalytic activity;identical protein binding;oxidoreductase activity;oxidoreductase activity, acting on the aldehyde or oxo group of donors;oxidoreductase activity, acting on the aldehyde or oxo group of donors, NAD or NADP as acceptor;protein binding;protein dimerization activity;protein homodimerization activity;succinate-semialdehyde dehydrogenase …	cell part;cytoplasmic part;intracellular membrane-bounded organelle;intracellular organelle;intracellular organelle lumen;intracellular organelle part;intracellular part;membrane-bounded organelle;membrane-enclosed lumen;mitochondrial matrix;mitochondrial part;mitochondrion;organelle;organelle lumen;organelle part	Alanine, aspartate and glutamate metabolism;Butanoate metabolism	AMINE_METABOLIC_PROCESS;AMINO_ACID_AND_DERIVATIVE_METABOLIC_PROCESS;AMINO_ACID_DERIVATIVE_METABOLIC_PROCESS;ANATOMICAL_STRUCTURE_DEVELOPMENT;AROMATIC_COMPOUND_METABOLIC_PROCESS;BASSO_CD40_SIGNALING_DN;BILD_E2F3_ONCOGENIC_SIGNATURE;BLALOCK_ALZHEIMERS_DISEASE_DN;BOYAULT_LIVER_CANCER_SUBCLASS_G3_DN;BRUINS_UVC_RESPONSE_VIA_TP53_GROUP_D;BUYTAERT_PHOTODYNAMIC_THERAPY_STRESS_DN;CARBOXYLIC_ACID_METABOLIC…	GO:0001505;GO:0005975;GO:0005996;GO:0006006;GO:0006066;GO:0006082;GO:0006083;GO:0006091;GO:0006105;GO:0006461;GO:0006518;GO:0006520;GO:0006536;GO:0006541;GO:0006575;GO:0006629;GO:0006631;GO:0006643;GO:0006644;GO:0006650;GO:0006664;GO:0006665;GO:0006672;GO:0006677;GO:0006678;GO:0006681;GO:0006687;GO:0006749;GO:0006790;GO:0006807;GO:0006810;GO:0006836;GO:0007154;GO:0007267;GO:0007268;GO:0007269;GO:…	GO:0003824;GO:0004029;GO:0004777;GO:0005488;GO:0005515;GO:0009013;GO:0016491;GO:0016620;GO:0016903;GO:0042802;GO:0042803;GO:0046983	GO:0005739;GO:0005759;GO:0031974;GO:0043226;GO:0043227;GO:0043229;GO:0043231;GO:0043233;GO:0044422;GO:0044424;GO:0044429;GO:0044444;GO:0044446;GO:0044464;GO:0070013	REACT_23964		12	12	12	36.1	36.1	36.1	57.214	0	21.965	1543000000	82	26.075	26.2462	26.4182	25.0446	24.9766	24.4779	28.0871	28.4351	28.4113	26.1178	25.5135	26.3633
	0.372621	0.556544		0.0105698	-0.0208696	MMSA_HUMAN	MMSA_HUMANMethylmalonate-semialdehydedehydrogenase[acylating],mitochondrial	Q02252	MMSA_HUMAN Methylmalonate-semialdehyde dehydrogenase [acylating], mitochondrial	ALDH6A1	ALDH6A1	COG1012	1.2.1.18;1.2.1.27	amine catabolic process;amine metabolic process;branched chain family amino acid catabolic process;branched chain family amino acid metabolic process;brown fat cell differentiation;carboxylic acid catabolic process;carboxylic acid metabolic process;catabolic process;cell differentiation;cellular amine metabolic process;cellular amino acid catabolic process;cellular amino acid metabolic process;ce…	aldehyde dehydrogenase (NAD) activity;binding;carboxylic acid binding;catalytic activity;coenzyme binding;cofactor binding;fatty acid binding;fatty-acyl-CoA binding;lipid binding;malonate-semialdehyde dehydrogenase (acetylating) activity;methylmalonate-semialdehyde dehydrogenase (acylating) activity;monocarboxylic acid binding;oxidoreductase activity;oxidoreductase activity, acting on the aldehyd…	cell part;cytoplasmic part;extracellular membrane-bounded organelle;extracellular organelle;extracellular region part;extracellular vesicular exosome;intracellular membrane-bounded organelle;intracellular organelle;intracellular organelle lumen;intracellular organelle part;intracellular part;membrane-bounded organelle;membrane-bounded vesicle;membrane-enclosed lumen;mitochondrial matrix;mitochond…	Inositol phosphate metabolism;Propanoate metabolism;Valine, leucine and isoleucine degradation	AACTTT_UNKNOWN;AMINE_METABOLIC_PROCESS;AMINO_ACID_AND_DERIVATIVE_METABOLIC_PROCESS;AMINO_ACID_METABOLIC_PROCESS;AROMATIC_COMPOUND_METABOLIC_PROCESS;BOCHKIS_FOXA2_TARGETS;BONOME_OVARIAN_CANCER_SURVIVAL_OPTIMAL_DEBULKING;BROWNE_HCMV_INFECTION_20HR_DN;BROWNE_HCMV_INFECTION_48HR_DN;CACGTG_V$MYC_Q2;CARBOXYLIC_ACID_METABOLIC_PROCESS;CCTGAGT,MIR-510;CHARAFE_BREAST_CANCER_LUMINAL_VS_MESENCHYMAL_UP;CHIANG…	GO:0006082;GO:0006139;GO:0006206;GO:0006208;GO:0006210;GO:0006520;GO:0006573;GO:0006574;GO:0006725;GO:0006807;GO:0008152;GO:0009056;GO:0009063;GO:0009081;GO:0009083;GO:0009112;GO:0009308;GO:0009310;GO:0009987;GO:0016054;GO:0019752;GO:0019859;GO:0030154;GO:0032502;GO:0034641;GO:0034655;GO:0042180;GO:0043436;GO:0044106;GO:0044237;GO:0044238;GO:0044248;GO:0044270;GO:0044281;GO:0044282;GO:0045444;GO:…	GO:0000062;GO:0003824;GO:0004029;GO:0004491;GO:0005488;GO:0005504;GO:0008289;GO:0016491;GO:0016620;GO:0016903;GO:0018478;GO:0031406;GO:0033293;GO:0048037;GO:0050662	GO:0005654;GO:0005739;GO:0005759;GO:0031974;GO:0031982;GO:0031988;GO:0043226;GO:0043227;GO:0043229;GO:0043230;GO:0043231;GO:0043233;GO:0044421;GO:0044422;GO:0044424;GO:0044428;GO:0044429;GO:0044444;GO:0044446;GO:0044464;GO:0065010;GO:0070013;GO:0070062	REACT_197		15	15	15	45.4	45.4	45.4	57.839	0	120.98	2695000000	172	27.9311	28.0772	27.8891	27.1024	25.9266	25.8951	29.439	28.795	27.3329	26.7048	25.262	26.8947
	0.666411	0.235839		0.877495	-0.791783	AL9A1_HUMAN	AL9A1_HUMAN4-trimethylaminobutyraldehydedehydrogenase	P49189	AL9A1_HUMAN 4-trimethylaminobutyraldehyde dehydrogenase	ALDH9A1	ALDH9A1	COG1012	1.2.1.19;1.2.1.3;1.2.1.47	amine biosynthetic process;amine metabolic process;anatomical structure development;betaine biosynthetic process;betaine metabolic process;biological regulation;biosynthetic process;carboxylic acid biosynthetic process;carboxylic acid metabolic process;carnitine biosynthetic process;carnitine metabolic process;cellular aldehyde metabolic process;cellular amine metabolic process;cellular amino aci…	1-pyrroline dehydrogenase activity;3-chloroallyl aldehyde dehydrogenase activity;4-trimethylammoniobutyraldehyde dehydrogenase activity;aldehyde dehydrogenase (NAD) activity;amine binding;aminobutyraldehyde dehydrogenase activity;binding;catalytic activity;coenzyme binding;cofactor binding;NAD binding;nucleotide binding;oxidoreductase activity;oxidoreductase activity, acting on the aldehyde or ox…	cell part;cytoplasm;cytoplasmic part;cytosol;extracellular membrane-bounded organelle;extracellular organelle;extracellular region part;extracellular vesicular exosome;intracellular membrane-bounded organelle;intracellular organelle;intracellular part;membrane-bounded organelle;membrane-bounded vesicle;mitochondrion;organelle;vesicle	Arginine and proline metabolism;Ascorbate and aldarate metabolism;beta-Alanine metabolism;Fatty acid metabolism;Glycerolipid metabolism;Glycolysis / Gluconeogenesis;Histidine metabolism;Lysine degradation;Propanoate metabolism;Pyruvate metabolism;Tryptophan metabolism;Valine, leucine and isoleucine degradation	ACEVEDO_LIVER_CANCER_DN;BIOSYNTHETIC_PROCESS;BYSTRYKH_HEMATOPOIESIS_STEM_CELL_AND_BRAIN_QTL_CIS;BYSTRYKH_HEMATOPOIESIS_STEM_CELL_QTL_CIS;CELL_CELL_SIGNALING;CELLULAR_BIOSYNTHETIC_PROCESS;CHESLER_BRAIN_QTL_CIS;chr1q22;CROMER_TUMORIGENESIS_DN;CYTOPLASM;DANG_BOUND_BY_MYC;DANG_MYC_TARGETS_DN;DANG_REGULATED_BY_MYC_DN;DIAZ_CHRONIC_MEYLOGENOUS_LEUKEMIA_UP;DOUGLAS_BMI1_TARGETS_UP;ELECTRON_TRANSPORT_GO_00…	GO:0001505;GO:0001822;GO:0001889;GO:0006081;GO:0006082;GO:0006520;GO:0006577;GO:0006578;GO:0006807;GO:0008152;GO:0008652;GO:0009058;GO:0009308;GO:0009309;GO:0009437;GO:0009987;GO:0010817;GO:0016053;GO:0019752;GO:0032502;GO:0034641;GO:0042133;GO:0042136;GO:0042180;GO:0042445;GO:0043436;GO:0044106;GO:0044237;GO:0044238;GO:0044249;GO:0044271;GO:0044281;GO:0044283;GO:0045329;GO:0046394;GO:0048513;GO:…	GO:0000166;GO:0003824;GO:0004028;GO:0004029;GO:0005488;GO:0016491;GO:0016620;GO:0016903;GO:0019145;GO:0033737;GO:0043176;GO:0047105;GO:0048037;GO:0050662;GO:0051287	GO:0005737;GO:0005739;GO:0005829;GO:0031982;GO:0031988;GO:0043226;GO:0043227;GO:0043229;GO:0043230;GO:0043231;GO:0044421;GO:0044424;GO:0044444;GO:0044464;GO:0065010;GO:0070062	REACT_2125		25	25	25	54.3	54.3	54.3	53.801	0	180.01	11622000000	589	30.2266	30.3236	30.4634	29.8085	28.7692	28.4358	30.8613	30.3978	30.462	28.3567	28.1789	28.1025
	2.1554	0.852417		1.14592	0.884737	ALDOA_HUMAN;ALDOB_HUMAN	ALDOA_HUMANFructose-bisphosphatealdolaseA	P04075	ALDOA_HUMAN Fructose-bisphosphate aldolase A	ALDOA	ALDOA	COG3588	4.1.2.13	actin cytoskeleton organization;actin filament organization;actin filament-based process;alcohol biosynthetic process;alcohol catabolic process;alcohol metabolic process;anatomical structure homeostasis;ATP biosynthetic process;ATP metabolic process;biological regulation;biosynthetic process;blood coagulation;carbohydrate biosynthetic process;carbohydrate catabolic process;carbohydrate metabolic …	actin binding;aldehyde-lyase activity;binding;carbohydrate binding;carbon-carbon lyase activity;catalytic activity;cytoskeletal protein binding;fructose binding;fructose-bisphosphate aldolase activity;identical protein binding;lyase activity;monosaccharide binding;protein binding;sugar binding;tubulin binding	actin cytoskeleton;cell part;contractile fiber part;cytoplasmic membrane-bounded vesicle lumen;cytoplasmic part;cytoplasmic vesicle part;cytoskeleton;cytosol;extracellular membrane-bounded organelle;extracellular organelle;extracellular region;extracellular region part;extracellular space;extracellular vesicular exosome;I band;intracellular membrane-bounded organelle;intracellular non-membrane-bo…	Carbon fixation in photosynthetic organisms;Fructose and mannose metabolism;Glycolysis / Gluconeogenesis;Pentose phosphate pathway	ACACTCC,MIR-122A;ALCOHOL_METABOLIC_PROCESS;BALLIF_DEVELOPMENTAL_DISABILITY_P16_P12_DELETION;BIOCARTA_MTA3_PATHWAY;BRACHAT_RESPONSE_TO_CAMPTOTHECIN_DN;BRACHAT_RESPONSE_TO_METHOTREXATE_DN;BUCKANOVICH_T_LYMPHOCYTE_HOMING_ON_TUMOR_DN;BURTON_ADIPOGENESIS_5;CACGTG_V$MYC_Q2;CACTGCC,MIR-34A,MIR-34C,MIR-449;CAGGTG_V$E12_Q6;CAMP_UP.V1_UP;CARBOHYDRATE_CATABOLIC_PROCESS;CARBOHYDRATE_METABOLIC_PROCESS;CARBON_…	GO:0001775;GO:0002576;GO:0003008;GO:0003012;GO:0005975;GO:0005996;GO:0006000;GO:0006006;GO:0006007;GO:0006066;GO:0006091;GO:0006094;GO:0006096;GO:0006139;GO:0006163;GO:0006164;GO:0006461;GO:0006753;GO:0006754;GO:0006807;GO:0006810;GO:0006887;GO:0006936;GO:0006941;GO:0006996;GO:0007010;GO:0007015;GO:0007596;GO:0007599;GO:0008152;GO:0008360;GO:0009056;GO:0009058;GO:0009117;GO:0009141;GO:0009142;GO:…	GO:0003779;GO:0003824;GO:0004332;GO:0005488;GO:0005515;GO:0005529;GO:0008092;GO:0015631;GO:0016829;GO:0016830;GO:0016832;GO:0030246;GO:0042802;GO:0048029;GO:0070061	GO:0005576;GO:0005615;GO:0005634;GO:0005829;GO:0005856;GO:0015629;GO:0016020;GO:0031093;GO:0031430;GO:0031674;GO:0031974;GO:0031982;GO:0031983;GO:0031988;GO:0034774;GO:0043226;GO:0043227;GO:0043228;GO:0043229;GO:0043230;GO:0043231;GO:0043232;GO:0043233;GO:0044421;GO:0044422;GO:0044424;GO:0044433;GO:0044444;GO:0044446;GO:0044449;GO:0044464;GO:0060205;GO:0065010;GO:0070062	REACT_1383;REACT_1520;REACT_318		38	38	32	92.9	92.9	79.4	39.42	0	323.31	115550000000	2619	33.0695	33.1176	33.0684	32.6951	31.8554	31.5167	34.2504	33.6827	33.8798	32.8352	32.7896	33.0966
	1.35398	0.644718		2.53509	1.99538	ALDOC_HUMAN	ALDOC_HUMANFructose-bisphosphatealdolaseC	P09972	ALDOC_HUMAN Fructose-bisphosphate aldolase C	ALDOC	ALDOC	COG3588	4.1.2.13	aging;alcohol biosynthetic process;alcohol metabolic process;anatomical structure morphogenesis;apoptosis;biosynthetic process;carbohydrate biosynthetic process;carbohydrate metabolic process;cell death;cell differentiation;cellular biosynthetic process;cellular carbohydrate biosynthetic process;cellular carbohydrate metabolic process;cellular component assembly;cellular component organization;ce…	aldehyde-lyase activity;binding;carbon-carbon lyase activity;catalytic activity;cytoskeletal protein binding;fructose-bisphosphate aldolase activity;lyase activity;protein binding	axon;cell part;cell projection;cytoplasmic part;cytoskeleton;cytosol;extracellular membrane-bounded organelle;extracellular organelle;extracellular region part;extracellular vesicular exosome;intracellular membrane-bounded organelle;intracellular non-membrane-bounded organelle;intracellular organelle;intracellular part;membrane-bounded organelle;membrane-bounded vesicle;mitochondrion;neuron proje…	Carbon fixation in photosynthetic organisms;Fructose and mannose metabolism;Glycolysis / Gluconeogenesis;Pentose phosphate pathway	ABBUD_LIF_SIGNALING_1_UP;AKL_HTLV1_INFECTION_UP;AKT_UP.V1_UP;AKT_UP_MTOR_DN.V1_UP;ALCOHOL_METABOLIC_PROCESS;BASAKI_YBX1_TARGETS_DN;BLALOCK_ALZHEIMERS_DISEASE_DN;BOYAULT_LIVER_CANCER_SUBCLASS_G2;CARBOHYDRATE_METABOLIC_PROCESS;CARBON_CARBON_LYASE_ACTIVITY;CASORELLI_ACUTE_PROMYELOCYTIC_LEUKEMIA_DN;CATRRAGC_UNKNOWN;CELLULAR_CARBOHYDRATE_METABOLIC_PROCESS;CERVERA_SDHB_TARGETS_1_DN;COATES_MACROPHAGE_M1…	GO:0001666;GO:0005975;GO:0005996;GO:0006000;GO:0006006;GO:0006066;GO:0006094;GO:0006461;GO:0006915;GO:0006950;GO:0007568;GO:0008152;GO:0008219;GO:0009058;GO:0009653;GO:0009719;GO:0009887;GO:0009987;GO:0010033;GO:0010243;GO:0012501;GO:0014070;GO:0016043;GO:0016051;GO:0016265;GO:0019318;GO:0019319;GO:0022607;GO:0030154;GO:0030388;GO:0030855;GO:0031099;GO:0031100;GO:0032502;GO:0034637;GO:0042221;GO:…	GO:0003824;GO:0004332;GO:0005488;GO:0005515;GO:0008092;GO:0016829;GO:0016830;GO:0016832	GO:0005739;GO:0005829;GO:0005856;GO:0030424;GO:0031982;GO:0031988;GO:0042995;GO:0043005;GO:0043226;GO:0043227;GO:0043228;GO:0043229;GO:0043230;GO:0043231;GO:0043232;GO:0044421;GO:0044424;GO:0044444;GO:0044464;GO:0065010;GO:0070062	REACT_1383;REACT_1520		26	20	20	77.2	63.7	63.7	39.455	0	323.31	27100000000	942	30.8701	31.0223	31.0466	29.9889	29.163	29.0016	31.9333	31.2094	31.7305	31.3907	31.3148	31.4342
[truncated: 5,066 more rows]
