# Supplementary material for: The Proteomic Landscape of Resting and Activated CD4+ T Cells Reveal Insights into Cell Differentiation and Function
Source: Int J Mol Sci. 2020 Dec 29;22(1):275. doi: 10.3390/ijms22010275 (PMC7795831; doi:10.3390/ijms22010275)
Supplement: Supplementary file 1 [file ijms-22-00275-s001.zip › Supplementary_table_3.xlsx]

## Sheet: Table3
Supplementary Table 3. Proteins identified from proteomic analysis of SUP-T1 cells
GI_Accession	RefSeq_Accession	Gene_symbol	Entrez_GeneID	Protein_Description	Exp._q-value:_Combined	Sum_PEP_Score	Coverage_[%]	#_Peptides	#_PSMs	#_Unique_Peptides	#_Protein_Groups	#_AAs	MW_[kDa]	calc._pI	Score_Sequest_HT:_Sequest_HT	#_Peptides_(by_Search_Engine):_Sequest_HT	Modifications
431822382	NP_443070.5	SEPTIN1	1731	septin-1	0	60.417	31	10	75	10	1	414	46.9	5.87	214.13	10
1034614232	XP_016859681.1	SEPTIN2	4735	PREDICTED: septin-2 isoform X3	0	66.902	38	11	94	11	1	428	49.4	7.36	311.12	11
768039038	XP_011529619.1	SEPTIN6	23157	PREDICTED: septin-6 isoform X1	0	68.734	28	11	143	7	1	526	59.9	7.37	462.97	11
578813710	XP_006715869.1	SEPTIN7	989	PREDICTED: septin-7 isoform X2	0	91.041	25	13	158	12	1	448	52	8.73	547.25	13
149363689	NP_001092281.1	SEPTIN8	23176	septin-8 isoform a	0	25.177	12	6	72	3	1	483	55.7	6.28	197.38	6
767993263	XP_011522506.1	SEPTIN9	10801	PREDICTED: septin-9 isoform X1	0	48.668	17	10	66	10	1	617	68.6	8.97	201.85	10
1034640529	XP_016863890.1	SEPTIN11	55752	PREDICTED: septin-11 isoform X2	0	20.133	10	5	79	1	1	439	51	7.01	204.51	5
42741648	NP_004252.2	SELENOF	9403	15 kDa selenoprotein isoform 1 precursor	0.002	5.032	7	1	5	1	1	165	18.1	5.03	12.05	1
767975412	XP_011537080.1	AAAS	8086	PREDICTED: aladin isoform X1	0	16.678	9	4	13	4	1	560	60.9	7.49	41.27	4
31982927	NP_076417.2	AACS	65985	acetoacetyl-CoA synthetase isoform 1	0	9.587	4	2	3	2	1	672	75.1	6.24	7.64	2
153251315	NP_078942.3	AAGAB	79719	alpha- and gamma-adaptin-binding protein p34 isoform 1	0.012	2.456	4	1	2	1	1	315	34.6	4.64	3.91	1
148277037	NP_055726.3	AAK1	22848	AP2-associated protein kinase 1	0	15.533	5	3	11	3	1	961	103.8	6.51	37.86	3
1034573268	XP_016873109.1	AAMDC	28971	PREDICTED: mth938 domain-containing protein isoform X3	0.002	5.075	10	1	2	1	1	166	18.6	9.25	5.72	1
700584700	NP_001289474.1	AAMP	14	angio-associated migratory cell protein isoform 1	0	7.871	7	2	4	2	1	435	46.8	4.42	16.85	2
109148542	NP_001596.2	AARS	16	alanine--tRNA ligase, cytoplasmic	0	123.111	25	22	167	22	1	968	106.7	5.53	621.52	22	Acetyl [N-Term]
38569417	NP_065796.1	AARS2	57505	alanine--tRNA ligase, mitochondrial	0	30.293	9	7	22	7	1	985	107.3	6.27	71.94	7
20357568	NP_056238.2	AASDHPPT	60496	L-aminoadipate-semialdehyde dehydrogenase-phosphopantetheinyl transferase	0	13.212	11	3	10	3	1	309	35.8	6.8	26.79	3
42490749	NP_004290.2	ABCB7	22	ATP-binding cassette sub-family B member 7, mitochondrial isoform 1	0	16.042	4	3	15	3	1	753	82.7	9.33	41.88	3
1034594636	XP_016878726.1	ABCC1	4363	PREDICTED: multidrug resistance-associated protein 1 isoform X1	0.009	2.804	1	1	1	1	1	1549	173.8	7.39	2.78	1
767905372	XP_006710865.2	ABCD3	5825	PREDICTED: ATP-binding cassette sub-family D member 3 isoform X1	0	39.201	10	7	39	7	1	683	78.4	9.16	134.32	7
108773784	NP_001035809.1	ABCE1	6059	ATP-binding cassette sub-family E member 1	0	31.812	16	8	32	8	1	599	67.3	8.34	95.97	8
69354671	NP_001020262.1	ABCF1	23	ATP-binding cassette sub-family F member 1 isoform a	0	117.28	22	16	132	16	1	845	95.9	6.8	493.48	16
10947137	NP_005683.2	ABCF2	10061	ATP-binding cassette sub-family F member 2 isoform b	0	59.021	21	11	43	11	1	634	72.4	7.49	124.67	11
148612853	NP_060828.2	ABCF3	55324	ATP-binding cassette sub-family F member 3	0	15.74	7	3	10	3	1	709	79.7	6.34	37.58	3
8923001	NP_060864.1	ABHD10	55347	mycophenolic acid acyl-glucuronide esterase, mitochondrial isoform 1 precursor	0	14.788	15	4	10	4	1	306	33.9	8.57	30.24	4
24308097	NP_056415.1	ABHD12	26090	monoacylglycerol lipase ABHD12 isoform b	0	7.655	6	2	4	2	1	404	45.5	8.65	12.4	2
226443152	NP_001139786.1	ABHD14B	84836	protein ABHD14B isoform 1	0	17.086	17	2	15	2	1	210	22.3	6.4	53.01	2
15100151	NP_066983.1	ABHD16A	7920	protein ABHD16A isoform a	0	34.405	15	6	11	6	1	558	63.2	8.13	34.59	6
61743942	NP_005461.2	ABI1	10006	abl interactor 1 isoform a	0	45.687	15	6	39	6	1	508	55	7.06	158.84	6
530369643	XP_005246274.1	ABI2	10152	PREDICTED: abl interactor 2 isoform X1	0	7.492	6	2	2	2	1	542	58.7	6.02	6.73	2
1034599385	XP_016880028.1	ABR	29	PREDICTED: active breakpoint cluster region-related protein isoform X1	0.005	3.516	1	1	1	1	1	1137	128.4	6.32	2.32	1
7019319	NP_037507.1	ABT1	29777	activator of basal transcription 1	0.002	5.218	7	1	5	1	1	272	31.1	9.88	12.98	1
4501853	NP_001598.1	ACAA1	30	3-ketoacyl-CoA thiolase, peroxisomal isoform a	0	8.612	14	3	7	3	1	424	44.3	8.44	23.67	3
167614485	NP_006102.2	ACAA2	10449	3-ketoacyl-CoA thiolase, mitochondrial	0	18.169	16	4	14	4	1	397	41.9	8.09	47.57	4
767994506	XP_011523005.1	ACACA	31	PREDICTED: acetyl-CoA carboxylase 1 isoform X5	0	45.006	6	9	29	9	1	2346	265.4	6.37	102	9	Acetyl [N-Term]
7656849	NP_055199.1	ACAD8	27034	isobutyryl-CoA dehydrogenase, mitochondrial	0	27.934	19	6	21	6	1	415	45	7.85	59.01	6
21361497	NP_054768.2	ACAD9	28976	acyl-CoA dehydrogenase family member 9, mitochondrial	0	21.026	12	5	14	5	1	621	68.7	7.96	37.59	5
554506556	NP_001272972.1	ACADM	34	medium-chain specific acyl-CoA dehydrogenase, mitochondrial isoform d precursor	0	31.743	18	6	36	6	1	454	50.2	7.8	105.48	6
4501859	NP_001600.1	ACADSB	36	short/branched chain specific acyl-CoA dehydrogenase, mitochondrial precursor	0	12.195	10	3	4	3	1	432	47.5	6.99	12.98	3
394025723	NP_001257376.1	ACADVL	37	very long-chain specific acyl-CoA dehydrogenase, mitochondrial isoform 3	0	33.266	11	7	20	7	1	678	72.9	8.75	59.63	7
7661880	NP_055531.1	ACAP1	9744	arf-GAP with coiled-coil, ANK repeat and PH domain-containing protein 1	0	12.281	4	2	7	2	1	740	81.5	7.66	34.38	2
1034632225	XP_016861535.1	ACAP2	23527	PREDICTED: arf-GAP with coiled-coil, ANK repeat and PH domain-containing protein 2 isoform X1	0	10.249	6	4	7	4	1	848	96.1	6.96	18.09	4
4557237	NP_000010.1	ACAT1	38	acetyl-CoA acetyltransferase, mitochondrial precursor	0	66.574	27	10	49	10	1	427	45.2	8.85	199.67	10
148539872	NP_005882.2	ACAT2	39	acetyl-CoA acetyltransferase, cytosolic isoform 1	0	25.793	14	5	24	5	1	397	41.3	6.92	97.34	5	Acetyl [N-Term]
15826852	NP_073572.2	ACBD3	64746	Golgi resident protein GCP60	0	43.876	17	6	28	6	1	528	60.6	5.06	112.43	6
1034570219	XP_016872373.1	ACBD5	91452	PREDICTED: acyl-CoA-binding domain-containing protein 5 isoform X1	0	11.684	5	2	4	2	1	609	68.3	6.86	12.9	2
89886362	NP_001034933.1	ACBD7	414149	acyl-CoA-binding domain-containing protein 7	0.002	5.129	16	1	7	1	1	88	9.8	6.71	23.77	1
130978956	NP_001075955.1	ACD	65057	adrenocortical dysplasia protein homolog isoform 1	0.003	4.641	2	1	4	1	1	544	57.7	6.74	12.07	1
7662238	NP_055792.1	ACIN1	22985	apoptotic chromatin condensation inducer in the nucleus isoform 1	0	167.914	28	24	255	24	1	1341	151.8	6.43	972.88	24
740086846	NP_001290203.1	ACLY	47	ATP-citrate synthase isoform 3	0	117.689	21	23	207	23	1	1155	126.1	8.18	608.82	23
8659555	NP_002188.1	ACO1	48	cytoplasmic aconitate hydratase	0	11.719	4	4	14	4	1	889	98.3	6.68	30.09	4
4501867	NP_001089.1	ACO2	50	aconitate hydratase, mitochondrial precursor	0	55.157	13	9	41	9	1	780	85.4	7.61	156.72	9
8923812	NP_060943.1	ACOT13	55856	acyl-coenzyme A thioesterase 13 isoform 1	0	9.055	16	2	13	2	1	140	15	9.14	40.39	2
148727286	NP_006812.3	ACOT2	10965	acyl-coenzyme A thioesterase 2, mitochondrial	0	28.648	16	7	16	7	1	483	53.2	8.47	43.75	7
32528282	NP_863654.1	ACOT7	11332	cytosolic acyl coenzyme A thioester hydrolase isoform hBACHb	0	94.034	29	13	118	13	1	380	41.8	8.54	402.43	13
34577075	NP_005460.2	ACOT8	10005	acyl-coenzyme A thioesterase 8	0.004	4.296	3	1	3	1	1	319	35.9	7.56	8.55	1
30089972	NP_004026.2	ACOX1	51	peroxisomal acyl-coenzyme A oxidase 1 isoform a	0	6.922	3	2	3	2	1	660	74.6	7.62	6.1	2
4757714	NP_004291.1	ACP1	52	low molecular weight phosphotyrosine protein phosphatase isoform c	0	50.164	49	9	55	9	1	158	18	6.74	212.72	9
4557010	NP_001601.1	ACP2	53	lysosomal acid phosphatase isoform 1 precursor	0	7.222	4	2	4	2	1	423	48.3	6.74	9.73	2
1034593885	XP_016878507.1	ACSF3	197322	PREDICTED: acyl-CoA synthetase family member 3, mitochondrial isoform X1	0	12.91	6	3	8	3	1	610	68	9.07	26.96	3
1034612408	XP_016859073.1	ACSL3	2181	PREDICTED: long-chain-fatty-acid--CoA ligase 3 isoform X1	0	24.654	11	6	27	5	1	720	80.4	8.38	70.75	6
768037494	XP_011529190.1	ACSL4	2182	PREDICTED: long-chain-fatty-acid--CoA ligase 4 isoform X1	0	25.855	8	4	31	3	1	711	79.1	8.38	95.95	4
28416953	NP_115890.2	ACSS1	84532	acetyl-coenzyme A synthetase 2-like, mitochondrial isoform 1 precursor	0.022	1.988	2	1	1	1	1	689	74.8	7.11	2.19	1
4501881	NP_001091.1	ACTA1	58	actin, alpha skeletal muscle	0	215.426	30	16	1132	1	1	377	42	5.39	3670.84	16
63055057	NP_001017992.1	ACTBL2	345651	beta-actin-like protein 2	0	74.243	26	11	515	3	1	376	42	5.59	1402.01	11
316659409	NP_001186883.1	ACTG1	71	actin, cytoplasmic 2	0	339.716	65	27	1817	11	1	375	41.8	5.48	5821.04	27
4757718	NP_004292.1	ACTL6A	86	actin-like protein 6A isoform 1	0	43.853	22	6	39	6	1	429	47.4	5.6	163.14	6
1034588379	XP_016877210.1	ACTN1	87	PREDICTED: alpha-actinin-1 isoform X2	0	93.152	17	15	111	8	1	1098	124.8	6.24	372.76	15
1034609602	XP_016882820.1	ACTN4	81	PREDICTED: alpha-actinin-4 isoform X3	0	159.94	31	23	199	16	1	933	107.2	5.41	764.86	23
767981023	XP_011535262.1	ACTR10	55860	PREDICTED: actin-related protein 10 isoform X1	0	8.805	7	2	5	2	1	424	47.1	7.62	21.14	2
5031569	NP_005727.1	ACTR1A	10121	alpha-centractin	0	33.344	32	9	65	5	1	376	42.6	6.64	154.11	9	Acetyl [N-Term]
11342680	NP_005726.1	ACTR1B	10120	beta-centractin	0	14.501	11	5	50	1	1	376	42.3	6.4	108.84	5
5031571	NP_005713.1	ACTR2	10097	actin-related protein 2 isoform b	0	37.563	17	6	44	6	1	394	44.7	6.74	145.17	6
5031573	NP_005712.1	ACTR3	10096	actin-related protein 3 isoform 1	0	82.706	35	15	149	15	1	418	47.3	5.88	546.18	15
39812115	NP_075050.3	ACTR8	93973	actin-related protein 8	0.004	4.103	2	1	1	1	1	624	70.4	7.78	3	1
701165620	NP_001289546.1	ACYP1	97	acylphosphatase-1 isoform c precursor	0	14.307	25	3	12	3	1	129	14.1	9.7	39.46	3
47078295	NP_000013.2	ADA	100	adenosine deaminase isoform 1	0	142.551	47	18	478	18	1	363	40.7	5.95	1555.78	18
4557251	NP_001101.1	ADAM10	102	disintegrin and metalloproteinase domain-containing protein 10 isoform 1 preproprotein	0	26.008	10	6	14	6	1	748	84.1	7.77	50.24	6
767908086	XP_011507362.1	ADAR	103	PREDICTED: double-stranded RNA-specific adenosine deaminase isoform X1	0	90.138	18	18	98	18	1	1269	140.7	8.56	309.5	18
767941894	XP_011533741.1	ADAT2	134637	PREDICTED: tRNA-specific adenosine deaminase 2 isoform X1	0.002	5.075	5	1	2	1	1	230	25.4	7.53	6.91	1
1034587608	XP_016876963.1	ADCK1	57143	PREDICTED: uncharacterized aarF domain-containing protein kinase 1 isoform X1	0	5.387	3	1	4	1	1	580	65.5	8.5	15.88	1
1034638314	XP_016863193.1	ADD1	118	PREDICTED: alpha-adducin isoform X3	0	50.391	22	12	46	12	1	768	84.3	5.96	151.24	12
1002341757	NP_001307520.1	ADD3	120	gamma-adducin isoform a	0	13.357	8	3	12	3	1	706	79.1	6.32	34.53	3
71565154	NP_000662.3	ADH5	128	alcohol dehydrogenase class-3	0	39.056	20	9	47	9	1	374	39.7	7.49	132.44	9
171460928	NP_060739.2	ADI1	55256	1,2-dihydroxy-3-keto-5-methylthiopentene dioxygenase isoform 1	0	12.192	12	2	8	2	1	179	21.5	5.68	30.18	2
32484975	NP_006712.2	ADK	132	adenosine kinase isoform b	0	16.067	11	2	9	2	1	362	40.5	6.7	36.84	2
542133159	NP_001269461.1	ADNP	23394	activity-dependent neuroprotector homeobox protein	0	64.94	16	15	50	15	1	1102	123.5	7.34	136.15	15	Acetyl [N-Term]
62177110	NP_116193.2	ADO	84890	2-aminoethanethiol dioxygenase	0.004	4.111	4	1	2	1	1	270	29.7	6.04	6.23	1
578827468	XP_006720775.1	ADPGK	83440	PREDICTED: ADP-dependent glucokinase isoform X1	0	24.395	10	4	15	4	1	497	54.1	6.2	48.66	4
8923417	NP_060295.1	ADPRHL2	54936	poly(ADP-ribose) glycohydrolase ARH3	0	27.215	16	4	19	4	1	363	38.9	5.07	69.75	4
148539876	NP_001610.2	ADRBK1	156	beta-adrenergic receptor kinase 1	0	26.699	9	6	19	6	1	689	79.5	7.28	45.44	6
1034620042	XP_016883093.1	ADRM1	11047	PREDICTED: proteasomal ubiquitin receptor ADRM1 isoform X1	0	10.556	11	3	16	3	1	414	42.8	5.15	42.47	3
768023815	XP_011528279.1	ADSL	158	PREDICTED: adenylosuccinate lyase isoform X1	0	18.854	7	4	28	4	1	526	59.3	7.09	128.96	4
34577063	NP_001117.2	ADSS	159	adenylosuccinate synthetase isozyme 2	0	20.625	10	4	19	4	1	456	50.1	6.55	66.81	4
166795264	NP_001107648.1	AEBP2	121536	zinc finger protein AEBP2 isoform b	0.014	2.343	2	1	1	1	1	517	54.4	5.21	2.28	1
5706731	NP_001121.2	AES	166	amino-terminal enhancer of split isoform b	0.015	2.281	6	1	1	1	1	197	22	6.37	2.59	1
530377716	XP_005263064.1	AFF1	4299	PREDICTED: AF4/FMR2 family member 1 isoform X1	0	6.07	2	1	2	1	1	1218	132.3	9.22	13.31	1
767918124	XP_011509472.1	AFF3	3899	PREDICTED: AF4/FMR2 family member 3 isoform X4	0.08	1.121	1	1	1	1	1	1303	141.6	8.31	0	1
300192933	NP_006787.2	AFG3L2	10939	AFG3-like protein 2	0	46.855	16	13	54	13	1	797	88.5	8.66	165.66	13
285002251	NP_000018.2	AGA	175	N(4)-(beta-N-acetylglucosaminyl)-L-asparaginase isoform 1 preproprotein	0.002	4.976	3	1	6	1	1	346	37.2	6.28	15.88	1
1034577844	XP_016874261.1	AGAP2	116986	PREDICTED: arf-GAP with GTPase, ANK repeat and PH domain-containing protein 2 isoform X1	0.016	2.166	1	1	2	1	1	1192	124.5	9.86	4.96	1
578804211	XP_006712541.1	AGFG1	3267	PREDICTED: arf-GAP domain and FG repeat-containing protein 1 isoform X1	0	21.986	8	3	17	3	1	602	62.6	8.56	81.83	3
530385822	XP_005250363.1	AGFG2	3268	PREDICTED: arf-GAP domain and FG repeat-containing protein 2 isoform X1	0.004	3.674	2	1	2	1	1	492	50.2	9.1	4.39	1
39725952	NP_060516.2	AGGF1	55109	angiogenic factor with G patch and FHA domains 1	0	5.915	4	1	2	1	1	714	80.9	5.44	9.03	1
8922701	NP_060708.1	AGK	55750	acylglycerol kinase, mitochondrial precursor	0	7.361	7	2	4	2	1	422	47.1	8.09	12.3	2
116734847	NP_000019.2	AGL	178	glycogen debranching enzyme isoform 1	0	41.358	9	10	19	10	1	1532	174.7	6.76	51.39	10
1034659931	XP_011515270.2	AGO2	27161	PREDICTED: protein argonaute-2 isoform X1	0	44.418	14	10	27	6	1	918	104	9.35	81.98	10
29294647	NP_079128.2	AGO3	192669	protein argonaute-3 isoform a	0	36.222	13	8	24	4	1	860	97.3	9.11	76.39	8	Acetyl [N-Term]
530381373	XP_005248862.1	AGPAT1	10554	PREDICTED: 1-acyl-sn-glycerol-3-phosphate acyltransferase alpha isoform X1	0	9.421	11	3	6	3	1	287	32.2	9.5	12.03	3
61743952	NP_060831.2	AGPAT5	55326	1-acyl-sn-glycerol-3-phosphate acyltransferase epsilon	0	8.557	7	3	3	3	1	364	42	9.1	2.96	3
4501993	NP_003650.1	AGPS	8540	alkyldihydroxyacetonephosphate synthase, peroxisomal precursor	0	46.052	19	9	41	9	1	658	72.9	7.34	139.66	9
557878673	NP_001273644.1	AGTPBP1	23287	cytosolic carboxypeptidase 1 isoform a	0.008	3.11	1	1	1	1	1	1278	143.1	6.43	2.1	1
767905182	XP_011540102.1	AGTRAP	57085	PREDICTED: type-1 angiotensin II receptor-associated protein isoform X1	0.009	2.877	13	1	1	1	1	171	18.7	6.77	2.15	1
578802190	XP_006711821.1	AHCTF1	25909	PREDICTED: protein ELYS isoform X1	0	58.477	8	12	36	12	1	2301	255.8	6.58	136.41	12
9951915	NP_000678.1	AHCY	191	adenosylhomocysteinase isoform 1	0	89.956	37	15	145	13	1	432	47.7	6.34	602.08	15
24308043	NP_056143.1	AHCYL2	23382	adenosylhomocysteinase 3 isoform a	0	24.834	7	5	33	3	1	611	66.7	7.36	106.7	5
31542701	NP_060121.3	AHI1	54806	jouberin isoform a	0.07	1.203	2	1	1	1	1	1196	137	7.12	3.48	1
6912280	NP_036243.1	AHSA1	10598	activator of 90 kDa heat shock protein ATPase homolog 1 isoform 1	0	36.424	16	6	63	6	1	338	38.3	5.53	207.19	6
4757732	NP_004199.1	AIFM1	9131	apoptosis-inducing factor 1, mitochondrial isoform AIF precursor	0	63.285	17	9	51	9	1	613	66.9	8.95	155.43	9
40316941	NP_057192.2	AIG1	51390	androgen-induced gene 1 protein isoform a	0.028	1.849	5	1	1	1	1	238	27.4	7.17	2.05	1
530383409	XP_005266896.1	AIM1	202	PREDICTED: absent in melanoma 1 protein isoform X1	0	5.322	1	1	1	1	1	2131	231.6	5.81	2.97	1
215490011	NP_001135888.1	AIMP1	9255	aminoacyl tRNA synthase complex-interacting multifunctional protein 1 isoform b precursor	0	41.875	23	5	44	5	1	336	37	8.65	176.18	5
11125770	NP_006294.2	AIMP2	7965	aminoacyl tRNA synthase complex-interacting multifunctional protein 2	0	33.024	26	6	27	6	1	320	35.3	8.22	86.46	6
729042247	NP_003968.3	AIP	9049	AH receptor-interacting protein isoform 1	0	83.926	38	11	136	11	1	330	37.6	6.42	511.52	11
4502013	NP_001616.1	AK2	204	adenylate kinase 2, mitochondrial isoform a	0	68.931	56	11	88	11	1	239	26.5	7.81	309.45	11
19923437	NP_057366.2	AK3	50808	GTP:AMP phosphotransferase AK3, mitochondrial isoform a	0	13.951	16	4	12	4	1	227	25.6	9.16	30.14	4
7706212	NP_057367.1	AK6	102157402	adenylate kinase isoenzyme 6 isoform b	0	8.976	20	3	8	3	1	172	20	4.58	16.53	3
1034601569	XP_016880678.1	AKAP1	8165	PREDICTED: A-kinase anchor protein 1, mitochondrial isoform X1	0	11.684	5	3	7	3	1	903	97.3	4.94	24.74	3
767977231	XP_011533207.1	AKAP11	11215	PREDICTED: A-kinase anchor protein 11 isoform X1	0	15.013	3	4	6	4	1	1901	210.4	5.39	16.84	4
1034652357	XP_016867006.1	AKAP12	9590	PREDICTED: A-kinase anchor protein 12 isoform X1	0	16.002	4	3	7	3	1	1782	191.4	4.41	30.41	3
5031579	NP_005849.1	AKAP8	10270	A-kinase anchor protein 8	0	22.278	13	6	14	6	1	692	76.1	5.15	36.02	6
612407827	NP_055186.3	AKAP8L	26993	A-kinase anchor protein 8-like isoform 1	0	6.49	4	2	10	2	1	646	71.6	5.05	20.62	2
5174391	NP_006057.1	AKR1A1	10327	alcohol dehydrogenase [NADP(+)]	0	34.938	27	8	37	7	1	325	36.6	6.79	98.9	8
4502049	NP_001619.1	AKR1B1	231	aldose reductase	0	52.25	31	11	133	10	1	316	35.8	6.98	361.24	11
24497583	NP_003730.4	AKR1C3	8644	aldo-keto reductase family 1 member C3 isoform 1	0	8.637	5	3	19	3	1	323	36.8	7.94	51.66	3
41327764	NP_003680.2	AKR7A2	8574	aflatoxin B1 aldehyde reductase member 2 isoform 1	0	34.193	25	8	34	8	1	359	39.6	7.17	103.51	8
768007342	XP_011524921.1	AKT2	208	PREDICTED: RAC-beta serine/threonine-protein kinase isoform X1	0	12.549	11	3	11	2	1	481	55.7	6.37	30.25	3
51558759	NP_001003945.1	ALAD	210	delta-aminolevulinic acid dehydratase isoform a	0	5.468	5	2	4	2	1	359	39	7.65	10.85	2
4502027	NP_000468.1	ALB	213	serum albumin preproprotein	0	21.151	8	5	17	4	1	609	69.3	6.28	42.89	5
223972651	NP_699160.2	ALDH16A1	126133	aldehyde dehydrogenase family 16 member A1 isoform 1	0	25.592	11	7	19	7	1	802	85.1	6.79	59.99	7
1020738530	NP_001310342.1	ALDH18A1	5832	delta-1-pyrroline-5-carboxylate synthase isoform 1	0	52.706	17	12	72	12	1	795	87.2	7.12	199.46	12
25777730	NP_000683.3	ALDH1B1	219	aldehyde dehydrogenase X, mitochondrial precursor	0	5.332	3	1	3	1	1	517	57.2	6.99	11.09	1
73466520	NP_001026976.1	ALDH3A2	224	fatty aldehyde dehydrogenase isoform 1	0	18.507	11	4	11	4	1	508	57.6	8.92	37.24	4
25777736	NP_733844.1	ALDH4A1	8659	delta-1-pyrroline-5-carboxylate dehydrogenase, mitochondrial isoform a precursor	0.008	2.982	4	1	1	1	1	563	61.7	8.07	3.16	1
25777721	NP_733936.1	ALDH5A1	7915	succinate-semialdehyde dehydrogenase, mitochondrial isoform 1 precursor	0	16.824	8	4	14	4	1	548	58.6	8.09	44.9	4
11095441	NP_005580.1	ALDH6A1	4329	methylmalonate-semialdehyde dehydrogenase [acylating], mitochondrial isoform 1 precursor	0	16.36	8	3	7	3	1	535	57.8	8.5	19.23	3
115387104	NP_000687.3	ALDH9A1	223	4-trimethylaminobutyraldehyde dehydrogenase	0	35.316	16	7	26	7	1	518	56.3	6.57	82.51	7
342187211	NP_001230106.1	ALDOA	226	fructose-bisphosphate aldolase A isoform 2	0	126.696	44	20	493	19	1	418	45.2	8.25	1639.27	20
530410969	XP_005258006.1	ALDOC	230	PREDICTED: fructose-bisphosphate aldolase C isoform X1	0	49.065	20	6	135	5	1	364	39.4	6.87	512.84	6
41350216	NP_061982.3	ALG1	56052	chitobiosyldiphosphodolichol beta-mannosyltransferase	0.002	5.137	3	1	6	1	1	464	52.5	7.23	16.64	1
5031953	NP_005778.1	ALG3	10195	dol-P-Man:Man(5)GlcNAc(2)-PP-Dol alpha-1,3-mannosyltransferase isoform a	0.002	4.985	3	1	2	1	1	438	50.1	9.44	7.14	1
7019323	NP_037470.1	ALG5	29880	dolichyl-phosphate beta-glucosyltransferase isoform 1	0	21.58	21	5	10	5	1	324	36.9	9.28	34.12	5
530432777	XP_005277780.1	ALG9	79796	PREDICTED: alpha-1,2-mannosyltransferase ALG9 isoform X1	0	5.411	3	1	3	1	1	629	72.2	8.85	10.77	1
48717226	NP_001001655.1	ALKBH2	121642	DNA oxidative demethylase ALKBH2 isoform 1	0	8.092	9	1	2	1	1	261	29.3	9.66	8.08	1
148539642	NP_060228.3	ALKBH5	54890	RNA demethylase ALKBH5	0.002	5.084	6	2	5	2	1	394	44.2	9.09	11.79	2
195927056	NP_620130.2	ALKBH8	91801	alkylated DNA repair protein alkB homolog 8 isoform 2	0.003	4.596	2	1	1	1	1	664	75.2	7.99	1.88	1	Acetyl [N-Term]
238776833	NP_005773.3	ALYREF	10189	THO complex subunit 4	0	44.418	16	5	86	5	1	264	27.5	11.05	349.49	5
392306969	NP_001254711.1	AMBRA1	55626	activating molecule in BECN1-regulated autophagy protein 1 isoform 1	0.008	3.021	1	1	1	1	1	1301	142.5	7.14	2.26	1
74275346	NP_001625.2	AMD1	262	S-adenosylmethionine decarboxylase proenzyme isoform 1	0.024	1.92	4	1	1	1	1	334	38.3	6	1.75	1	Acetyl [N-Term]
1021312222	NP_001310441.1	AMFR	267	E3 ubiquitin-protein ligase AMFR isoform d	0.002	4.883	2	1	2	1	1	675	76.4	5.76	5.74	1
21264318	NP_004028.3	AMPD2	271	AMP deaminase 2 isoform 1	0	27.028	10	9	23	9	1	879	100.6	6.93	66.31	9
767919249	XP_011509935.1	ANAPC1	64682	PREDICTED: anaphase-promoting complex subunit 1 isoform X1	0	17.226	3	3	11	3	1	1948	216.8	6.3	42.02	3
1034638076	XP_016863127.1	ANAPC10	10393	PREDICTED: anaphase-promoting complex subunit 10 isoform X1	0.004	3.602	5	1	1	1	1	223	25.1	8.73	3.1	1
334688840	NP_001229304.1	ANAPC13	25847	anaphase-promoting complex subunit 13	0.009	2.632	9	1	4	1	1	74	8.5	4.18	8.29	1	Acetyl [N-Term]
557948106	NP_001273685.1	ANAPC4	29945	anaphase-promoting complex subunit 4 isoform 1	0	11.415	4	3	6	3	1	809	92.2	5.53	13.21	3
20127553	NP_057321.2	ANAPC5	51433	anaphase-promoting complex subunit 5 isoform a	0.043	1.539	2	1	1	1	1	755	85	6.87	2.02	1
212549736	NP_057322.2	ANAPC7	51434	anaphase-promoting complex subunit 7 isoform a	0	8.208	4	2	5	2	1	599	66.8	5.64	16.04	2
1034600055	XP_016880222.1	ANKFY1	51479	PREDICTED: rabankyrin-5 isoform X1	0	5.329	1	1	3	1	1	1273	138.7	6.55	11.12	1
37620163	NP_065741.3	ANKHD1-EIF4EBP3	404734	ANKHD1-EIF4EBP3 protein	0	86.084	10	16	52	10	1	2617	277	5.86	180.05	16	Acetyl [N-Term]
148664230	NP_055929.1	ANKLE2	23141	ankyrin repeat and LEM domain-containing protein 2	0	27.227	9	5	13	5	1	938	104.1	7.09	47.26	5
28461129	NP_064715.1	ANKMY2	57037	ankyrin repeat and MYND domain-containing protein 2	0.008	3.132	2	1	1	1	1	441	49.3	6.25	2.25	1
530401512	XP_005254037.1	ANKRD13A	88455	PREDICTED: ankyrin repeat domain-containing protein 13A isoform X1	0	14.142	7	3	4	3	1	591	67.7	5.02	12.94	3
58331113	NP_001009941.1	ANKRD16	54522	ankyrin repeat domain-containing protein 16 isoform a	0.009	2.805	4	1	1	1	1	361	39.3	7.25	2.47	1
38683807	NP_115593.3	ANKRD17	26057	ankyrin repeat domain-containing protein 17 isoform a	0	77.505	9	15	38	9	1	2603	274.1	6.52	132.96	15
578834973	XP_006723475.1	ANKRD27	84079	PREDICTED: ankyrin repeat domain-containing protein 27 isoform X1	0.004	3.9	2	1	1	1	1	1050	116.9	6.87	2.56	1
767922794	XP_011531842.1	ANKRD28	23243	PREDICTED: serine/threonine-protein phosphatase 6 regulatory ankyrin repeat subunit A isoform X1	0	43.335	10	7	26	7	1	1086	116.5	6.18	90.05	7
862669338	NP_001297083.1	ANKRD36C	400986	ankyrin repeat domain-containing protein 36C	0.032	1.766	0	1	2	1	1	2144	239.8	8.41	4.67	1
530371147	XP_005247002.1	ANKRD44	91526	PREDICTED: serine/threonine-protein phosphatase 6 regulatory ankyrin repeat subunit B isoform X1	0.003	4.622	1	1	2	1	1	1074	116.2	6.16	6.85	1
767939587	XP_011512736.1	ANKS1A	23294	PREDICTED: ankyrin repeat and SAM domain-containing protein 1A isoform X6	0	11.211	3	2	2	2	1	1145	124.5	6.43	9.96	2
109150435	NP_001035869.1	ANKZF1	55139	ankyrin repeat and zinc finger domain-containing protein 1 isoform 1	0	11.36	5	3	11	3	1	726	80.9	8.41	22.5	3
578813549	XP_006715809.1	ANLN	54443	PREDICTED: actin-binding protein anillin isoform X1	0	5.284	2	1	1	1	1	1142	126.4	8	4.27	1
5453880	NP_006296.1	ANP32A	8125	acidic leucine-rich nuclear phosphoprotein 32 family member A	0	57.597	35	11	115	7	1	249	28.6	4.09	391.47	11
5454088	NP_006392.1	ANP32B	10541	acidic leucine-rich nuclear phosphoprotein 32 family member B	0	29.891	18	7	77	3	1	251	28.8	4.06	226.85	7
530365433	XP_005245570.1	ANP32E	81611	PREDICTED: acidic leucine-rich nuclear phosphoprotein 32 family member E isoform X1	0	21.729	9	3	51	3	1	286	32.9	3.89	203.11	3
1034665059	XP_016870146.1	ANXA1	301	PREDICTED: annexin A1 isoform X1	0	19.161	15	4	9	4	1	357	40.1	7.78	26	4
530393508	XP_005269798.1	ANXA11	311	PREDICTED: annexin A11 isoform X1	0	38.222	15	8	43	8	1	605	65.6	8.27	131.16	8
50845388	NP_001002858.1	ANXA2	302	annexin A2 isoform 1	0	12.534	12	3	5	3	1	357	40.4	8.37	15.07	3
1002623478	NP_001307627.1	ANXA4	307	annexin A4 isoform a	0	38.773	23	8	26	8	1	321	36.1	6.13	87.2	8
4502107	NP_001145.1	ANXA5	308	annexin A5	0	41.281	21	9	66	9	1	320	35.9	5.05	202.58	9
71773329	NP_001146.2	ANXA6	309	annexin A6 isoform 1	0	117.339	30	18	139	18	1	673	75.8	5.6	467.74	18
4809279	NP_004025.1	ANXA7	310	annexin A7 isoform 2	0	37.892	24	11	43	11	1	488	52.7	5.68	116.92	11
260436860	NP_663782.2	AP1B1	162	AP-1 complex subunit beta-1 isoform b	0	56.202	13	12	63	5	1	939	103.5	5.16	185.14	12
71773010	NP_001025178.1	AP1G1	164	AP-1 complex subunit gamma-1 isoform a	0	22.058	6	5	34	4	1	825	91.7	6.8	99.27	5
530404832	XP_005268224.1	AP1G2	8906	PREDICTED: AP-1 complex subunit gamma-like 2 isoform X1	0	5.235	2	2	4	1	1	842	93.6	7.17	8.14	2
194473724	NP_001123996.1	AP1M1	8907	AP-1 complex subunit mu-1 isoform 1	0	14.005	10	4	7	4	1	435	49.8	7.61	18.14	4
4557471	NP_001274.1	AP1S1	1174	AP-1 complex subunit sigma-1A	0	10.138	15	2	11	1	1	158	18.7	5.73	53.45	2
22027655	NP_003907.3	AP1S2	8905	AP-1 complex subunit sigma-2 isoform 2	0	9.463	15	2	2	1	1	157	18.6	5.47	4.45	2
768007010	XP_011524858.1	AP2A1	160	PREDICTED: AP-2 complex subunit alpha-1 isoform X1	0	38.872	11	9	33	7	1	994	109.6	6.55	104.01	9
338827685	NP_001229766.1	AP2A2	161	AP-2 complex subunit alpha-2 isoform 1	0	22.517	7	6	15	4	1	940	104	6.86	44.43	6
71773106	NP_001025177.1	AP2B1	163	AP-2 complex subunit beta isoform a	0	60.11	14	13	58	6	1	951	105.6	5.34	177.71	13
909618061	NP_001298127.1	AP2M1	1173	AP-2 complex subunit mu isoform c	0	32.601	16	7	31	7	1	460	52.3	9.5	88.82	7
768006376	XP_011524725.1	AP2S1	1175	PREDICTED: AP-2 complex subunit sigma isoform X1	0.016	2.126	4	1	3	1	1	172	20.3	7.36	5.76	1
32484979	NP_003655.3	AP3B1	8546	AP-3 complex subunit beta-1 isoform 1	0	10.874	3	2	3	2	1	1094	121.2	6.04	13.38	2
387849337	NP_001248755.1	AP3D1	8943	AP-3 complex subunit delta-1 isoform 3	0	29.799	5	5	21	5	1	1215	136.6	7.64	78.28	5
6912240	NP_036227.1	AP3M1	26985	AP-3 complex subunit mu-1 isoform a	0	9.255	8	3	5	3	1	418	46.9	6.93	10.43	3
4502861	NP_001275.1	AP3S1	1176	AP-3 complex subunit sigma-1 isoform 1	0	13.639	18	3	23	3	1	193	21.7	5.39	72.74	3
8922913	NP_060817.1	AP5S1	55317	AP-5 complex subunit sigma-1	0.003	4.499	15	1	1	1	1	200	22.5	6.87	2.73	1
578818421	XP_006717514.1	APBB1IP	54518	PREDICTED: amyloid beta A4 precursor protein-binding family B member 1-interacting protein isoform X1	0	23.487	10	6	36	6	1	666	73.1	5.59	91.83	6
23510451	NP_001631.3	APEH	327	acylamino-acid-releasing enzyme	0	51.191	17	9	46	9	1	732	81.2	5.48	149.98	9
18375505	NP_542380.1	APEX1	328	DNA-(apurinic or apyrimidinic site) lyase	0	62.387	19	8	106	8	1	318	35.5	8.12	436.35	8
578820896	XP_006718422.1	API5	8539	PREDICTED: apoptosis inhibitor 5 isoform X1	0	48.059	22	11	44	11	1	509	57.3	6.09	151.41	11
767966013	XP_011518456.1	APIP	51074	PREDICTED: methylthioribulose-1-phosphate dehydratase isoform X1	0	63.657	42	10	82	10	1	259	29.3	7.96	276.75	10
38348374	NP_940946.1	APITD1-CORT	100526739	APITD1-CORT protein isoform 1	0.002	4.678	7	1	19	1	1	164	19	7.75	39.52	1	Acetyl [N-Term]
24308201	NP_065392.1	APMAP	57136	adipocyte plasma membrane-associated protein	0.002	5.131	3	1	8	1	1	416	46.5	6.16	28.6	1
1034628692	XP_016884213.1	APOL2	23780	PREDICTED: apolipoprotein L2 isoform X2	0	15.401	11	4	6	4	1	449	48.9	6	18.6	4
1034673514	XP_016884760.1	APOOL	139322	PREDICTED: MICOS complex subunit MIC27 isoform X1	0	27.961	25	4	18	4	1	276	29.9	9.48	71.21	4
6912242	NP_036228.1	APPL1	26060	DCC-interacting protein 13-alpha	0	57.665	18	9	45	9	1	709	79.6	5.41	186.51	9
4502171	NP_000476.1	APRT	353	adenine phosphoribosyltransferase isoform a	0	26.772	34	4	30	4	1	180	19.6	6.02	95.66	4
1034670422	XP_016870320.1	APTX	54840	PREDICTED: aprataxin isoform X1	0.009	2.892	3	1	1	1	1	423	47.7	8.78	2.46	1
38788372	NP_055506.1	AQR	9716	intron-binding protein aquarius	0	36.154	6	7	27	7	1	1485	171.2	6.37	85.68	7
578838017	XP_006724592.1	ARAF	369	PREDICTED: serine/threonine-protein kinase A-Raf isoform X1	0	25.209	10	5	18	4	1	611	68	9.01	58.51	5
11863154	NP_001646.2	ARCN1	372	coatomer subunit delta isoform 1	0	80.249	31	16	111	16	1	511	57.2	6.21	337.34	16
1034558384	XP_016856722.1	ARF1	375	PREDICTED: ADP-ribosylation factor 1 isoform X1	0	5.465	5	1	34	1	1	212	23.8	9.39	103.04	1
4502205	NP_001651.1	ARF4	378	ADP-ribosylation factor 4	0	8.411	14	2	2	1	1	180	20.5	7.14	6.35	2
4502209	NP_001653.1	ARF5	381	ADP-ribosylation factor 5	0	10.966	18	3	61	2	1	180	20.5	6.79	186.93	3
8922652	NP_060679.1	ARFGAP1	55738	ADP-ribosylation factor GTPase-activating protein 1 isoform a	0	24.456	17	5	12	5	1	406	44.6	5.66	42.32	5
530395869	XP_005253223.1	ARFGAP2	84364	PREDICTED: ADP-ribosylation factor GTPase-activating protein 2 isoform X1	0	11.505	5	2	16	2	1	560	60.9	7.71	52.38	2
214829673	NP_055385.3	ARFGAP3	26286	ADP-ribosylation factor GTPase-activating protein 3 isoform 1	0	34.748	15	6	14	6	1	516	56.9	7.36	52.26	6
150417986	NP_006411.2	ARFGEF2	10564	brefeldin A-inhibited guanine nucleotide-exchange protein 2	0.002	4.958	1	2	2	2	1	1785	201.9	6.33	4.62	2
338827746	NP_001229783.1	ARFIP2	23647	arfaptin-2 isoform 1	0	10.357	7	2	3	2	1	374	41.6	6.38	11.8	2
134152708	NP_060481.3	ARGLU1	55082	arginine and glutamate-rich protein 1	0.008	2.962	3	1	4	1	1	273	33.2	10.35	8.76	1
767965879	XP_011518397.1	ARHGAP1	392	PREDICTED: rho GTPase-activating protein 1 isoform X2	0	21.251	12	5	20	5	1	439	50.4	6.29	72	5
1034615241	XP_016859988.1	ARHGAP15	55843	PREDICTED: rho GTPase-activating protein 15 isoform X1	0	26.868	15	6	18	6	1	475	54.5	9.39	54.15	6
767988616	XP_011544175.1	ARHGAP17	55114	PREDICTED: rho GTPase-activating protein 17 isoform X1	0.002	4.689	3	1	1	1	1	913	98.9	7.46	4	1
67906814	NP_116289.4	ARHGAP19	84986	rho GTPase-activating protein 19 isoform 1	0	7.788	6	2	5	2	1	494	55.7	9.36	10.27	2
71040098	NP_001020769.1	ARHGAP30	257106	rho GTPase-activating protein 30 isoform 1	0.002	4.736	2	1	1	1	1	1101	118.5	4.81	3.54	1
150417981	NP_004482.4	ARHGAP35	2909	rho GTPase-activating protein 35	0	9.162	2	3	5	3	1	1499	170.4	6.64	9.99	3
258613907	NP_001158213.1	ARHGAP4	393	rho GTPase-activating protein 4 isoform 1	0.002	5.065	2	1	4	1	1	986	109.3	6.47	15	1
1034587041	XP_016876776.1	ARHGAP5	394	PREDICTED: rho GTPase-activating protein 5 isoform X1	0.008	3.106	1	1	3	1	1	1502	172.4	6.62	7.72	1
767997413	XP_011521876.1	ARHGDIA	396	PREDICTED: rho GDP-dissociation inhibitor 1 isoform X1	0	69.229	24	6	142	6	1	249	27.5	5.01	598.99	6
1009287518	NP_001308350.1	ARHGDIB	397	rho GDP-dissociation inhibitor 2	0	128.286	56	12	150	12	1	201	23	5.21	658.23	12
530417520	XP_005259443.1	ARHGEF1	9138	PREDICTED: rho guanine nucleotide exchange factor 1 isoform X1	0	64.308	17	16	49	16	1	1041	116	7.33	150.27	16
768001545	XP_011526138.1	ARHGEF18	23370	PREDICTED: rho guanine nucleotide exchange factor 18 isoform X1	0	18.884	5	3	14	3	1	1426	158.7	6.52	62.15	3
767910855	XP_011508441.1	ARHGEF2	9181	PREDICTED: rho guanine nucleotide exchange factor 2 isoform X1	0	51.631	13	12	42	12	1	1139	127.7	7.42	140.2	12
1034675704	XP_016885464.1	ARHGEF6	9459	PREDICTED: rho guanine nucleotide exchange factor 6 isoform X1	0	27.155	7	4	24	2	1	807	90.6	6.18	118.09	4
578825277	XP_006720019.1	ARHGEF7	8874	PREDICTED: rho guanine nucleotide exchange factor 7 isoform X1	0	26.151	7	5	20	3	1	815	91.8	7.24	70.4	5
21264565	NP_006006.3	ARID1A	8289	AT-rich interactive domain-containing protein 1A isoform a	0	181.94	19	31	132	31	1	2285	241.9	6.7	456.08	31
1034650999	XP_011534286.2	ARID1B	57492	PREDICTED: AT-rich interactive domain-containing protein 1B isoform X1	0	20.762	3	4	14	4	1	2359	248.9	6.61	40.73	4
56549668	NP_689854.2	ARID2	196528	AT-rich interactive domain-containing protein 2	0	27.277	6	7	12	7	1	1835	197.3	7.42	34.66	7
4885193	NP_005215.1	ARID3A	1820	AT-rich interactive domain-containing protein 3A	0.003	4.4	2	1	1	1	1	593	62.9	4.91	3.08	1
1034559157	XP_016856957.1	ARID4B	51742	PREDICTED: AT-rich interactive domain-containing protein 4B isoform X1	0.008	3.031	1	1	1	1	1	1314	148	5.1	2.76	1
187761373	NP_005735.2	ARIH1	25820	E3 ubiquitin-protein ligase ARIH1	0	33.208	12	6	12	6	1	557	64.1	5.08	44.14	6
767922092	XP_011531567.1	ARIH2	10425	PREDICTED: E3 ubiquitin-protein ligase ARIH2 isoform X1	0	6.658	4	2	4	2	1	516	60.5	5.78	8.16	2
148612885	NP_001658.2	ARL2	402	ADP-ribosylation factor-like protein 2 isoform 1	0.002	4.807	6	1	1	1	1	184	20.9	6.34	2.36	1
1034568278	XP_016871749.1	ARL3	403	PREDICTED: ADP-ribosylation factor-like protein 3 isoform X1	0	19.122	26	4	14	4	1	182	20.4	7.24	34.43	4
540344578	NP_001269360.1	ARL4C	10123	ADP-ribosylation factor-like protein 4C isoform 1	0.002	4.782	11	2	3	2	1	201	22.4	8.81	2.27	2
24308007	NP_055976.1	ARL6IP1	23204	ADP-ribosylation factor-like protein 6-interacting protein 1 isoform 1	0	6.931	5	1	4	1	1	203	23.3	9.32	11.41	1
507834119	NP_061164.3	ARL6IP4	51329	ADP-ribosylation factor-like protein 6-interacting protein 4 isoform 1	0	17.899	14	4	10	4	1	421	44.9	10.93	46.47	4
5453704	NP_006398.1	ARL6IP5	10550	PRA1 family protein 3	0	7.223	11	2	8	2	1	188	21.6	9.77	19.26	2	Acetyl [N-Term]
22749091	NP_689735.1	ARL6IP6	151188	ADP-ribosylation factor-like protein 6-interacting protein 6	0.002	4.911	5	1	1	1	1	226	24.7	6.33	3.83	1
20270343	NP_620150.1	ARL8A	127829	ADP-ribosylation factor-like protein 8A isoform 1	0	15.72	23	4	17	1	1	186	21.4	7.77	49.68	4
8922601	NP_060654.1	ARL8B	55207	ADP-ribosylation factor-like protein 8B	0	18.504	23	5	21	2	1	186	21.5	8.43	60.74	5
1034660805	XP_016869094.1	ARMC1	55156	PREDICTED: armadillo repeat-containing protein 1 isoform X1	0	8.523	13	2	6	2	1	282	31.3	5.74	18.87	2	Acetyl [N-Term]
312836798	NP_001186125.1	ARMC6	93436	armadillo repeat-containing protein 6 isoform 1	0	6.181	4	2	9	2	1	501	54.1	6.24	17.33	2
32526896	NP_056211.2	ARMC8	25852	armadillo repeat-containing protein 8 isoform 2	0	9.806	5	3	6	3	1	659	73.9	6.73	11.76	3	Acetyl [N-Term]
530422070	XP_005262198.1	ARMCX3	51566	PREDICTED: armadillo repeat-containing X-linked protein 3 isoform X1	0	16.549	16	4	9	4	1	379	42.5	8.37	29.6	4
22907052	NP_006400.2	ARPC1A	10552	actin-related protein 2/3 complex subunit 1A isoform 1	0	5.673	9	3	6	3	1	370	41.5	8.18	16.97	3
578813850	XP_006715888.1	ARPC1B	10095	PREDICTED: actin-related protein 2/3 complex subunit 1B isoform X1	0	61.705	35	9	59	9	1	372	40.9	8.35	258.77	9
5031599	NP_005722.1	ARPC2	10109	actin-related protein 2/3 complex subunit 2	0	28.441	14	4	45	4	1	300	34.3	7.36	151.06	4
514052670	NP_001265485.1	ARPC3	10094	actin-related protein 2/3 complex subunit 3 isoform 1	0.002	5.068	14	3	7	3	1	178	20.5	8.59	4.08	3
311771647	NP_001185709.1	ARPC4	10093	actin-related protein 2/3 complex subunit 4 isoform c	0	10.116	14	3	22	3	1	187	21.6	8.59	59.67	3
394025704	NP_001257368.1	ARPC5	10092	actin-related protein 2/3 complex subunit 5 isoform 2	0	11.321	40	3	14	3	1	154	16.6	6.02	50.83	3
13569956	NP_112240.1	ARPC5L	81873	actin-related protein 2/3 complex subunit 5-like protein	0.02	2.024	8	1	1	1	1	153	16.9	6.6	2.19	1
807201093	NP_001293120.1	ARPP19	10776	cAMP-regulated phosphoprotein 19 isoform 1	0	14.914	31	3	20	1	1	131	14.5	8.31	60.04	3
767922173	XP_011531602.1	ARPP21	10777	PREDICTED: cAMP-regulated phosphoprotein 21 isoform X1	0	7.602	4	2	7	2	1	848	93	7.02	20.09	2
767992145	XP_011522160.1	ARRB2	409	PREDICTED: beta-arrestin-2 isoform X1	0.002	4.713	3	1	7	1	1	440	49.2	8.85	21.51	1
189011546	NP_004306.3	ASAH1	427	acid ceramidase isoform b	0.002	4.683	3	1	3	1	1	411	46.5	7.85	9.64	1
1034629622	XP_016884480.1	ASCC2	84164	PREDICTED: activating signal cointegrator 1 complex subunit 2 isoform X1	0.015	2.237	1	1	1	1	1	816	92.7	5.22	2.31	1
767941789	XP_011533696.1	ASCC3	10973	PREDICTED: activating signal cointegrator 1 complex subunit 3 isoform X1	0	5.614	1	2	3	2	1	2207	251.9	7.09	8.45	2
7661592	NP_054753.1	ASF1A	25842	histone chaperone ASF1A	0	5.98	9	2	11	1	1	204	23	4.41	25.07	2
8922549	NP_060624.1	ASF1B	55723	histone chaperone ASF1B	0	10.446	11	2	12	1	1	202	22.4	4.56	26.38	2
530388141	XP_005273739.1	ASH2L	9070	PREDICTED: set1/Ash2 histone methyltransferase complex subunit ASH2 isoform X1	0	6.887	6	4	6	4	1	634	69.2	5.69	11.99	4
530423013	XP_005274840.1	ASMTL	8623	PREDICTED: N-acetylserotonin O-methyltransferase-like protein isoform X1	0	60.35	22	11	36	11	1	621	68.8	6.07	129.36	11
50428938	NP_004308.2	ASNA1	439	ATPase ASNA1	0	16.753	15	4	27	4	1	348	38.8	4.91	59.57	4
168229248	NP_597680.2	ASNS	440	asparagine synthetase [glutamine-hydrolyzing] isoform a	0	30.612	16	8	27	8	1	561	64.3	6.86	67.24	8
1034601143	XP_016880525.1	ASPSCR1	79058	PREDICTED: tether containing UBX domain for GLUT4 isoform X1	0	17.838	7	2	6	2	1	660	71.3	7.3	27.27	2
145275200	NP_079356.3	ASRGL1	80150	isoaspartyl peptidase/L-asparaginase	0	23.209	19	4	22	4	1	308	32	6.24	88.26	4	Acetyl [N-Term]
767972147	XP_011519052.1	ASUN	55726	PREDICTED: protein asunder homolog isoform X1	0	10.895	5	3	6	3	1	712	80.8	6.7	16.97	3
1034570105	XP_016872336.1	ATAD1	84896	PREDICTED: ATPase family AAA domain-containing protein 1 isoform X1	0	24.199	15	4	17	4	1	361	40.7	6.9	71.26	4
24497618	NP_054828.2	ATAD2	29028	ATPase family AAA domain-containing protein 2	0	43.85	8	9	29	7	1	1390	158.5	6.32	88.46	9
767914709	XP_011531220.1	ATAD2B	54454	PREDICTED: ATPase family AAA domain-containing protein 2B isoform X1	0	14.817	4	4	7	2	1	1511	171	7.36	27.51	4
283436220	NP_060658.3	ATAD3A	55210	ATPase family AAA domain-containing protein 3A isoform 1	0	44.323	17	9	39	9	1	634	71.3	8.98	122.74	9
767995951	XP_011523571.1	ATAD5	79915	PREDICTED: ATPase family AAA domain-containing protein 5 isoform X1	0	6.536	2	2	2	2	1	1845	207.5	9.19	5.89	2
1034579654	XP_016874820.1	ATF1	466	PREDICTED: cyclic AMP-dependent transcription factor ATF-1 isoform X1	0	8.93	13	2	5	1	1	279	30.1	8.65	16.45	2
1034577669	XP_016874211.1	ATF7	11016	PREDICTED: cyclic AMP-dependent transcription factor ATF-7 isoform X1	0	5.948	5	1	7	1	1	483	51.7	8	20.03	1
557440804	NP_851997.1	ATF7IP	55729	activating transcription factor 7-interacting protein 1 isoform 1	0	12.08	3	2	4	2	1	1278	137.4	4.72	14.93	2
31542675	NP_068753.2	ATG101	60673	autophagy-related protein 101	0.004	4.015	6	1	1	1	1	218	25	6.15	3.06	1
326807039	NP_001192048.1	ATG13	9776	autophagy-related protein 13 isoform 3	0.003	4.655	2	1	1	1	1	550	60.1	5.29	3.38	1	Acetyl [N-Term]
19526773	NP_071933.2	ATG3	64422	ubiquitin-like-conjugating enzyme ATG3 isoform 1	0	25.396	12	4	35	4	1	314	35.8	4.74	114.84	4	Acetyl [N-Term]
30795252	NP_443168.2	ATG4A	115201	cysteine protease ATG4A isoform a	0	6.189	6	1	2	1	1	398	45.3	5.05	10.71	1
767917277	XP_005247049.2	ATG4B	23192	PREDICTED: cysteine protease ATG4B isoform X1	0	10.881	7	2	7	2	1	415	46.1	5.92	26.38	2	Acetyl [N-Term]
1034630704	XP_016861031.1	ATG7	10533	PREDICTED: ubiquitin-like modifier-activating enzyme ATG7 isoform X1	0	10.983	5	3	7	3	1	738	81.7	6.65	21.2	3
20127454	NP_004035.2	ATIC	471	bifunctional purine biosynthesis protein PURH	0	148.885	53	27	282	27	1	592	64.6	6.71	852.17	27
767915000	XP_011531319.1	ATL2	64225	PREDICTED: atlastin-2 isoform X1	0.009	2.904	2	1	1	1	1	584	66.7	6.4	2.58	1
45827806	NP_056274.3	ATL3	25923	atlastin-3 isoform 1	0	36.089	9	4	40	4	1	541	60.5	5.66	138.71	4
4757804	NP_004036.1	ATOX1	475	copper transport protein ATOX1	0	5.404	13	2	5	2	1	68	7.4	7.24	10.74	2
170016077	NP_065143.2	ATP13A1	57130	manganese-transporting ATPase 13A1	0	9.132	2	2	2	2	1	1204	132.9	8.13	7.09	2
21361181	NP_000692.2	ATP1A1	476	sodium/potassium-transporting ATPase subunit alpha-1 isoform a	0	103.765	27	22	132	11	1	1023	112.8	5.49	406.92	22
371940940	NP_001243143.1	ATP1A3	478	sodium/potassium-transporting ATPase subunit alpha-3 isoform 3	0	69.646	16	13	100	2	1	1026	113	5.38	311.78	13
4502281	NP_001670.1	ATP1B3	483	sodium/potassium-transporting ATPase subunit beta-3	0	20.101	8	3	25	3	1	279	31.5	8.35	99.38	3
32698767	NP_150592.1	ATP23	91419	mitochondrial inner membrane protease ATP23 homolog isoform a	0.008	3.06	12	2	2	2	1	246	28.1	8.03	4.81	2
24638454	NP_733765.1	ATP2A2	488	sarcoplasmic/endoplasmic reticulum calcium ATPase 2 isoform b	0	99.805	19	19	99	14	1	1042	114.7	5.34	341.07	19	Acetyl [N-Term]
767992196	XP_011522183.1	ATP2A3	489	PREDICTED: sarcoplasmic/endoplasmic reticulum calcium ATPase 3 isoform X1	0	121.422	23	22	130	17	1	1114	121.5	6.02	436.96	22	Acetyl [N-Term]
48255957	NP_001675.3	ATP2B4	493	plasma membrane calcium-transporting ATPase 4 isoform 4b	0	11.371	3	3	7	3	1	1205	133.8	6.42	22.56	3
530374410	XP_005247411.1	ATP2C1	27032	PREDICTED: calcium-transporting ATPase type 2C member 1 isoform X1	0	9.463	3	2	5	2	1	983	108.1	6.76	17.09	2
1034604119	XP_016881278.1	ATP5A1	498	PREDICTED: ATP synthase subunit alpha, mitochondrial isoform X1	0	116.513	32	19	256	19	1	586	64.1	9.28	933.15	19
32189394	NP_001677.2	ATP5B	506	ATP synthase subunit beta, mitochondrial precursor	0	191.432	39	16	506	16	1	529	56.5	5.4	1911.68	16
50345988	NP_001001973.1	ATP5C1	509	ATP synthase subunit gamma, mitochondrial isoform L (liver) precursor	0	41.508	25	7	47	7	1	298	33	9.22	151.61	7
50345991	NP_001001975.1	ATP5D	513	ATP synthase subunit delta, mitochondrial precursor	0	20.347	20	4	17	4	1	168	17.5	5.49	62.33	4
5901896	NP_008817.1	ATP5E	514	ATP synthase subunit epsilon, mitochondrial	0	9.501	55	4	19	4	1	51	5.8	9.92	49.2	4
21361565	NP_001679.2	ATP5F1	515	ATP synthase F(0) complex subunit B1, mitochondrial precursor	0	52.863	27	8	60	8	1	256	28.9	9.36	283.56	8
5453559	NP_006347.1	ATP5H	10476	ATP synthase subunit d, mitochondrial isoform a	0	48.997	43	8	87	8	1	161	18.5	5.3	263.6	8
6005717	NP_009031.1	ATP5I	521	ATP synthase subunit e, mitochondrial	0	5.49	32	2	8	2	1	69	7.9	9.35	20.99	2
51479141	NP_001003701.1	ATP5J	522	ATP synthase-coupling factor 6, mitochondrial isoform b precursor	0	21.28	45	4	17	4	1	116	13.4	9.07	58.99	4
311893396	NP_001185808.1	ATP5J2-PTCD1	100526740	ATP5J2-PTCD1 fusion protein	0	6.536	3	2	5	2	1	749	84.1	8.72	10.53	2
51479156	NP_006467.4	ATP5L	10632	ATP synthase subunit g, mitochondrial	0	18.595	47	4	30	4	1	103	11.4	9.64	89.63	4
4502303	NP_001688.1	ATP5O	539	ATP synthase subunit O, mitochondrial precursor	0	52.787	47	10	62	10	1	213	23.3	9.96	201.26	10
251831112	YP_003024031.1	ATP6	4508	ATP synthase F0 subunit 6 (mitochondrion)	0.003	4.485	4	1	7	1	1	226	24.8	10.1	20.44	1
530412417	XP_005257516.1	ATP6V0A1	535	PREDICTED: V-type proton ATPase 116 kDa subunit a isoform X1	0.004	3.584	4	2	3	2	1	844	97.2	6.43	7.81	2
42741679	NP_036595.2	ATP6V0A2	23545	V-type proton ATPase 116 kDa subunit a isoform 2	0	6.133	3	2	2	2	1	856	98	6.61	2.85	2
19913432	NP_004682.2	ATP6V0D1	9114	V-type proton ATPase subunit d 1	0.002	5.041	5	1	2	1	1	351	40.3	5	7.59	1
19913424	NP_001681.2	ATP6V1A	523	V-type proton ATPase catalytic subunit A	0	35.384	11	6	46	6	1	617	68.3	5.52	151.69	6	Acetyl [N-Term]
19913428	NP_001684.2	ATP6V1B2	526	V-type proton ATPase subunit B, brain isoform	0	36.14	18	8	56	8	1	511	56.5	5.81	173.53	8
4502315	NP_001686.1	ATP6V1C1	528	V-type proton ATPase subunit C 1	0	15.521	7	2	10	2	1	382	43.9	7.46	42.59	2
7706757	NP_057078.1	ATP6V1D	51382	V-type proton ATPase subunit D	0.006	3.291	4	1	2	1	1	247	28.2	9.36	5.89	1
4502317	NP_001687.1	ATP6V1E1	529	V-type proton ATPase subunit E 1 isoform a	0	17.404	21	5	14	5	1	226	26.1	8	45.33	5
312032453	NP_001185838.1	ATP6V1F	9296	V-type proton ATPase subunit F isoform 2	0.009	2.84	6	1	2	1	1	147	16.4	5.08	5.16	1
4757818	NP_004879.1	ATP6V1G1	9550	V-type proton ATPase subunit G 1	0	16.658	24	2	13	2	1	118	13.7	8.79	53.66	2
47717102	NP_998785.1	ATP6V1H	51606	V-type proton ATPase subunit H isoform 1	0	16.623	10	3	12	3	1	483	55.8	6.48	45.43	3
251831111	YP_003024030.1	ATP8	4509	ATP synthase F0 subunit 8 (mitochondrion)	0.002	4.949	29	2	10	2	1	68	8	9.91	28.95	2
7705927	NP_057395.1	ATPIF1	93974	ATPase inhibitor, mitochondrial isoform 1 precursor	0	6.588	9	1	11	1	1	106	12.2	9.35	31.46	1
767926988	XP_011511226.1	ATR	545	PREDICTED: serine/threonine-protein kinase ATR isoform X1	0.003	4.458	0	1	2	1	1	2646	301.4	7.4	7.67	1
530788276	NP_000480.3	ATRX	546	transcriptional regulator ATRX isoform 1	0.004	3.859	0	1	3	1	1	2492	282.4	6.55	9.44	1
7106299	NP_037368.1	ATXN10	25814	ataxin-10 isoform 1	0	64.818	24	10	49	10	1	475	53.5	5.25	176.69	10
171543895	NP_002964.3	ATXN2	6311	ataxin-2 isoform 1	0	7.148	1	1	3	1	1	1313	140.2	9.57	18.44	1
530407517	XP_005255126.1	ATXN2L	11273	PREDICTED: ataxin-2-like protein isoform X6	0	89.869	21	19	116	19	1	1082	114.1	8.59	372.06	19
13518019	NP_004984.2	ATXN3	4287	ataxin-3 reference isoform	0	36.363	17	5	23	5	1	361	41.2	4.78	102.52	5
31712030	NP_853553.1	AUP1	550	ancient ubiquitous protein 1	0.016	2.178	3	1	4	1	1	410	45.8	8.65	9.03	1	Acetyl [N-Term]
1034625742	XP_016883523.1	AURKA	6790	PREDICTED: aurora kinase A isoform X1	0.003	4.641	4	1	1	1	1	437	49.3	9.47	3.96	1
548960892	NP_001271455.1	AURKB	9212	aurora kinase B isoform 3	0	15.636	12	4	12	4	1	345	39.4	9.36	32.44	4
9966841	NP_065104.1	AVEN	57099	cell death regulator Aven	0	6.476	6	2	5	2	1	362	38.5	4.98	11.85	2
530406197	XP_005254606.1	B2M	567	PREDICTED: beta-2-microglobulin isoform X1	0	7.086	19	2	6	2	1	122	14	7.44	20.05	2
571026606	NP_001275685.1	BABAM1	29086	BRISC and BRCA1-A complex member 1 isoform 1	0	16.433	21	4	22	4	1	329	36.5	4.64	50.18	4	Acetyl [N-Term]
288915525	NP_004314.5	BAG1	573	BAG family molecular chaperone regulator 1 isoform BAG-1L	0.012	2.578	2	1	6	1	1	345	38.9	8.13	13.36	1
4757834	NP_004273.1	BAG2	9532	BAG family molecular chaperone regulator 2	0	47.676	35	7	35	7	1	211	23.8	6.7	140.82	7
6631075	NP_004865.1	BAG4	9530	BAG family molecular chaperone regulator 4 isoform 1	0.003	4.408	3	1	3	1	1	457	49.6	5.12	6.89	1
62548856	NP_001015049.1	BAG5	9529	BAG family molecular chaperone regulator 5 isoform a	0	13.784	9	3	3	3	1	488	56	6	9.56	3
1034651596	XP_016866770.1	BAG6	7917	PREDICTED: large proline-rich protein BAG6 isoform X1	0	59.599	14	12	39	12	1	1182	124.2	5.69	101.37	12	Acetyl [N-Term]
9257199	NP_059345.1	BAIAP2	10458	brain-specific angiogenesis inhibitor 1-associated protein 2 isoform 2	0	10.172	8	3	6	3	1	552	60.8	8.9	16.11	3
767940441	XP_011513081.1	BAK1	578	PREDICTED: bcl-2 homologous antagonist/killer isoform X1	0	5.754	16	1	6	1	1	211	23.4	6.01	23.17	1
4502389	NP_003851.1	BANF1	8815	barrier-to-autointegration factor	0	24.107	48	3	35	3	1	89	10.1	6.09	104.12	3
1034595059	XP_016878867.1	BANP	54971	PREDICTED: protein BANP isoform X1	0	6.573	4	2	2	2	1	536	58.5	5.36	5.53	2
767924383	XP_011532451.1	BAP1	8314	PREDICTED: ubiquitin carboxyl-terminal hydrolase BAP1 isoform X1	0.022	2.012	1	1	2	1	1	752	82.9	7.03	3.65	1
32967603	NP_038476.2	BAZ1A	11177	bromodomain adjacent to zinc finger domain protein 1A isoform a	0	43.142	8	10	34	10	1	1556	178.6	6.6	101.59	10
14670392	NP_115784.1	BAZ1B	9031	tyrosine-protein kinase BAZ1B	0	177.364	22	30	162	30	1	1483	170.8	8.48	597.4	30
767972930	XP_011536102.1	BAZ2A	11176	PREDICTED: bromodomain adjacent to zinc finger domain protein 2A isoform X4	0	25.659	3	4	10	4	1	1931	213.9	6.77	45.12	4
213511508	NP_001132929.1	BCAP31	10134	B-cell receptor-associated protein 31 isoform a	0	48.589	27	7	30	7	1	313	34.7	7.84	127.57	7
5031653	NP_005863.1	BCAS2	10286	pre-mRNA-splicing factor SPF27	0	40.758	38	9	34	9	1	225	26.1	5.66	117.56	9
767995125	XP_011523241.1	BCAS3	54828	PREDICTED: breast carcinoma-amplified sequence 3 isoform X1	0	6.015	2	1	1	1	1	1073	117.1	7.18	3.62	1
296010904	NP_001171564.1	BCAT1	586	branched-chain-amino-acid aminotransferase, cytosolic isoform 4	0	13.013	6	3	16	3	1	398	44.1	5.39	45.14	3
50658084	NP_001181.2	BCAT2	587	branched-chain-amino-acid aminotransferase, mitochondrial isoform a precursor	0	17.845	8	3	14	3	1	392	44.3	8.65	45.22	3
7706581	NP_057651.1	BCCIP	56647	BRCA2 and CDKN1A-interacting protein isoform BCCIPalpha	0.004	3.595	2	1	4	1	1	322	36.2	4.69	10.35	1
1034634877	XP_016862456.1	BCHE	590	PREDICTED: cholinesterase isoform X1	0.006	3.383	2	1	3	1	1	643	72.8	7.55	9.05	1
11386135	NP_000700.1	BCKDHA	593	2-oxoisovalerate dehydrogenase subunit alpha, mitochondrial isoform 1 precursor	0.004	3.919	2	1	3	1	1	445	50.4	8.27	8.37	1
171906589	NP_005872.2	BCKDK	10295	[3-methyl-2-oxobutanoate dehydrogenase [lipoamide]] kinase, mitochondrial isoform a precursor	0.068	1.241	2	1	1	1	1	412	46.3	8.82	2.19	1
767906661	XP_011540699.1	BCL10	8915	PREDICTED: B-cell lymphoma/leukemia 10 isoform X1	0	5.402	6	1	4	1	1	286	32.5	8.65	11.12	1
12597635	NP_075049.1	BCL11B	64919	B-cell lymphoma/leukemia 11B isoform 2	0	63.201	22	12	67	12	1	823	88.4	6.51	257.54	12
10337613	NP_066273.1	BCL7A	605	B-cell CLL/lymphoma 7 protein family member A isoform a	0.009	2.88	3	1	4	1	1	231	25	5.45	10.07	1
666638008	NP_001287990.1	BCL7B	9275	B-cell CLL/lymphoma 7 protein family member B isoform 3	0.012	2.558	7	1	6	1	1	213	23.5	4.61	6.74	1
7661958	NP_055554.1	BCLAF1	9774	bcl-2-associated transcription factor 1 isoform 1	0	126.903	21	18	154	2	1	920	106.1	9.98	528.03	18
530384253	XP_005267294.1	BCLAF1	9774	PREDICTED: bcl-2-associated transcription factor 1 isoform X1	0	109.102	21	16	147	1	1	871	100.3	9.95	503.16	16
1034615659	XP_016860120.1	BCS1L	617	PREDICTED: mitochondrial chaperone BCS1 isoform X1	0	8.689	6	2	3	2	1	419	47.5	8.5	8.55	2
767927354	XP_011511369.1	BDH1	622	PREDICTED: D-beta-hydroxybutyrate dehydrogenase, mitochondrial isoform X1	0	6.484	7	3	10	3	1	347	38.8	8.19	17.65	3
1034640691	XP_016863950.1	BDH2	56898	PREDICTED: 3-hydroxybutyrate dehydrogenase type 2 isoform X1	0	20.058	20	4	13	4	1	259	28.4	7.65	43.97	4
767972299	XP_011519114.1	BICD1	636	PREDICTED: protein bicaudal D homolog 1 isoform X1	0.054	1.332	1	1	1	1	1	988	112.4	6.11	1.91	1
51479166	NP_001003800.1	BICD2	23299	protein bicaudal D homolog 2 isoform 1	0	14.265	5	4	7	4	1	855	96.7	5.44	19.35	4
1034629309	XP_016884395.1	BID	637	PREDICTED: BH3-interacting domain death agonist isoform X1	0	14.276	11	3	16	3	1	246	27.5	5.9	53.32	3
59859882	NP_001012271.1	BIRC5	332	baculoviral IAP repeat-containing protein 5 isoform 3	0	7.988	15	2	13	2	1	165	18.6	6.21	25.37	2
578803024	XP_005264506.2	BIRC6	57448	PREDICTED: baculoviral IAP repeat-containing protein 6 isoform X1	0	33.122	2	8	18	8	1	4884	533	6.05	42.97	8
324715041	NP_001191354.1	BIVM-ERCC5	100533467	BIVM-ERCC5 protein	0	8.398	1	2	2	2	1	1640	184.5	6.3	6.55	2
4557365	NP_000048.1	BLM	641	Bloom syndrome protein isoform 1	0	40.992	8	9	29	8	1	1417	158.9	7.49	81.41	9
4557367	NP_000377.1	BLMH	642	bleomycin hydrolase	0	26.229	11	5	19	5	1	455	52.5	6.27	39.94	5
315113895	NP_001478.2	BLOC1S1	2647	biogenesis of lysosome-related organelles complex 1 subunit 1	0.003	4.435	7	1	3	1	1	153	17.3	9.33	7.7	1
46852398	NP_776170.2	BLOC1S2	282991	biogenesis of lysosome-related organelles complex 1 subunit 2 isoform 1	0	7.076	21	1	2	1	1	142	16	4.86	14.23	1
47086495	NP_997715.1	BLOC1S3	388552	biogenesis of lysosome-related organelles complex 1 subunit 3	0	13.91	17	2	6	2	1	202	21.2	5.15	30.92	2
41152237	NP_958437.1	BLOC1S5	63915	biogenesis of lysosome-related organelles complex 1 subunit 5 isoform 1	0	18.5	25	4	9	4	1	187	21.6	7.59	20.71	4
359465572	NP_001240752.1	BLVRA	644	biliverdin reductase A precursor	0	11.92	13	3	7	3	1	296	33.4	6.44	23.78	3
530392739	XP_005271903.1	BMS1	9790	PREDICTED: ribosome biogenesis protein BMS1 homolog isoform X1	0	9.569	3	3	6	3	1	1282	145.7	6.44	18.67	3
153946399	NP_053582.2	BNIP1	662	vesicle transport protein SEC20 isoform BNIP1-b	0	7.548	9	2	2	2	1	271	31.1	8.91	3.95	2
530376284	XP_005248207.1	BOD1L1	259282	PREDICTED: biorientation of chromosomes in cell division protein 1-like 1 isoform X3	0	70.926	6	13	44	13	1	3098	335.3	5.14	159.53	13
578801005	XP_006711411.1	BOLA1	51027	PREDICTED: bolA-like protein 1 isoform X1	0	6.786	19	2	4	2	1	137	14.3	7.96	11.29	2
73622130	NP_001026997.1	BOLA2	552900	bolA-like protein 2 isoform 1	0	16.99	16	2	25	2	1	152	16.9	8.19	103.46	2
21327667	NP_056016.1	BOP1	23246	ribosome biogenesis protein BOP1	0	40.66	17	10	43	10	1	746	83.6	6.19	115.69	10
190358526	NP_060092.2	BORCS6	54785	uncharacterized protein C17orf59	0	7.433	8	2	2	2	1	357	37.2	5.76	3.86	2
209969690	NP_653192.2	BORCS7	119032	UPF0693 protein C10orf32	0	7.083	24	2	4	2	1	106	11.7	6.79	9.16	2	Acetyl [N-Term]
767948600	XP_011514829.1	BPGM	669	PREDICTED: bisphosphoglycerate mutase isoform X1	0.004	3.702	5	1	1	1	1	259	30	6.54	3.87	1
221316588	NP_004323.2	BPHL	670	valacyclovir hydrolase isoform 1 precursor	0.02	2.049	3	1	9	1	1	291	32.5	9.14	17.63	1
530365929	XP_005273056.1	BPNT1	10380	PREDICTED: 3'(2'),5'-bisphosphate nucleotidase 1 isoform X1	0	47.319	29	8	40	8	1	323	35.2	6.05	143.36	8
530411774	XP_005257207.1	BPTF	2186	PREDICTED: nucleosome-remodeling factor subunit BPTF isoform X1	0	7.996	1	2	3	2	1	3158	350	6.49	7.15	2
530401440	XP_005254001.1	BRAP	8315	PREDICTED: BRCA1-associated protein isoform X1	0	5.754	4	2	4	2	1	633	71.6	6.61	6.46	2
767944983	XP_011513480.1	BRAT1	221927	PREDICTED: BRCA1-associated ATM activator 1 isoform X1	0	30.367	14	7	16	7	1	909	97.4	5.99	54.41	7
530422945	XP_005274808.1	BRCC3	79184	PREDICTED: lys-63-specific deubiquitinase BRCC36 isoform X2	0	19.708	13	3	5	3	1	317	36.1	5.92	16.87	3
1034628669	XP_016884204.1	BRD1	23774	PREDICTED: bromodomain-containing protein 1 isoform X2	0	7.34	1	2	6	2	1	1189	133.2	8.59	15.4	2
313747417	NP_001186384.1	BRD2	6046	bromodomain-containing protein 2 isoform 2	0	49.313	12	9	42	7	1	836	92	9.13	160.93	9
11067749	NP_031397.1	BRD3	8019	bromodomain-containing protein 3	0	27.006	8	4	25	2	1	726	79.5	9.36	88.3	4
768001660	XP_011526156.1	BRD4	23476	PREDICTED: bromodomain-containing protein 4 isoform X1	0	63.04	10	13	65	10	1	1362	152.1	9.19	207.74	13
767989830	XP_011521349.1	BRD7	29117	PREDICTED: bromodomain-containing protein 7 isoform X2	0	16.849	10	4	6	4	1	668	76.1	6.52	21.65	4
530379631	XP_005271912.1	BRD8	10902	PREDICTED: bromodomain-containing protein 8 isoform X1	0	16.492	3	3	12	3	1	1308	142.7	4.63	38.62	3
21361171	NP_004890.2	BRE	9577	BRCA1-A complex subunit BRE isoform 1	0	8.87	5	2	27	2	1	415	46.9	6.14	69.2	2	Acetyl [N-Term]
19923665	NP_542193.3	BRI3BP	140707	BRI3-binding protein precursor	0	20.356	17	2	15	2	1	251	27.8	9.44	83.89	2
55770900	NP_060791.3	BRIX1	55299	ribosome biogenesis protein BRX1 homolog	0	15.267	13	5	12	5	1	353	41.4	9.92	25.67	5
27544939	NP_060932.2	BRK1	55845	protein BRICK1	0.004	3.601	11	1	3	1	1	75	8.7	5.45	10.04	1
767908461	XP_011507514.1	BROX	148362	PREDICTED: BRO1 domain-containing protein BROX isoform X2	0	9.388	5	2	7	2	1	432	48.2	8.46	23.19	2
767924252	XP_011532403.1	BRPF1	7862	PREDICTED: peregrin isoform X1	0	9.33	2	2	7	1	1	1248	140.8	7.9	18.78	2
530381792	XP_005249068.1	BRPF3	27154	PREDICTED: bromodomain and PHD finger-containing protein 3 isoform X1	0	11.476	3	3	10	2	1	1205	135.7	6.58	23.97	3
38372919	NP_001719.2	BSG	682	basigin isoform 1 precursor	0	44.362	16	4	54	4	1	385	42.2	5.66	220.51	4
27477070	NP_003963.1	BTAF1	9044	TATA-binding protein-associated factor 172	0	34.481	5	7	21	7	1	1849	206.8	6.52	79.77	7
20127580	NP_060267.2	BTBD2	55643	BTB/POZ domain-containing protein 2	0.004	4.235	2	1	1	1	1	525	55.9	5.9	1.81	1
20070130	NP_001198.2	BTF3	689	transcription factor BTF3 isoform B	0	37.103	40	6	73	1	1	162	17.7	7.5	225.73	6
83641885	NP_001032726.1	BTF3	689	transcription factor BTF3 isoform A	0	34.013	38	6	61	1	1	206	22.2	9.38	188.4	6
56847620	NP_689478.1	BTF3L4	91408	transcription factor BTF3 homolog 4 isoform 1	0	9.611	23	2	28	2	1	158	17.3	6.35	84.03	2
4757878	NP_004327.1	BUB1	699	mitotic checkpoint serine/threonine-protein kinase BUB1 isoform 1	0.064	1.257	1	1	1	1	1	1085	122.3	6.47	3.4	1
59814247	NP_001202.4	BUB1B	701	mitotic checkpoint serine/threonine-protein kinase BUB1 beta	0	11.105	4	3	5	3	1	1050	119.4	5.25	12.78	3
191252780	NP_001122100.1	BUB1B-PAK6	106821730	serine/threonine-protein kinase PAK 6	0.032	1.769	1	1	3	1	1	681	74.8	9.52	0	1
4757880	NP_004716.1	BUB3	9184	mitotic checkpoint protein BUB3 isoform a	0	84.669	29	10	121	10	1	328	37.1	6.84	492.44	10
14249338	NP_116114.1	BUD13	84811	BUD13 homolog isoform 1	0	21.109	8	4	15	4	1	619	70.5	9.86	35.93	4
32171175	NP_003901.2	BUD31	8896	protein BUD31 homolog	0	22.896	33	5	24	5	1	144	17	8.82	54.79	5
51173724	NP_004044.3	BYSL	705	bystin	0	68.567	27	9	49	9	1	437	49.6	8.12	186	9
333470719	NP_001193997.1	BZW1	9689	basic leucine zipper and W2 domain-containing protein 1 isoform 2	0	20.813	10	6	25	6	1	451	51.2	6.62	63.78	6
7661744	NP_054757.1	BZW2	28969	basic leucine zipper and W2 domain-containing protein 2	0	21.559	12	5	18	5	1	419	48.1	6.68	48.8	5
24431975	NP_056467.2	C10orf12	26148	uncharacterized protein C10orf12	0	9.908	2	2	4	2	1	1247	137.1	8.24	14.08	2
154350213	NP_078817.2	C10orf76	79591	UPF0668 protein C10orf76	0.004	3.931	2	1	2	1	1	689	78.7	6.6	6.08	1
767970045	XP_011541083.1	C11orf54	28970	PREDICTED: ester hydrolase C11orf54 isoform X1	0	17.511	14	3	21	3	1	315	35.1	6.7	65.24	3
7657234	NP_055082.1	C11orf58	10944	small acidic protein	0	46.892	26	5	42	5	1	183	20.3	4.72	227.19	5
208431771	NP_001129107.1	C11orf68	83638	UPF0696 protein C11orf68 isoform 1	0	5.287	4	1	4	1	1	293	31.5	6.32	13.54	1
21361535	NP_057485.2	C11orf73	51501	protein Hikeshi isoform 1	0	12.437	18	3	6	3	1	197	21.6	5.45	19.36	3	Acetyl [N-Term]
767967520	XP_011543072.1	C11orf84	144097	PREDICTED: uncharacterized protein C11orf84 isoform X1	0	6.107	7	1	3	1	1	399	43.3	5.3	15.57	1
554790405	NP_001273015.1	C11orf98	102288414	uncharacterized protein C11orf98	0	17.958	34	4	9	4	1	123	14.2	11.53	39.26	4
145275185	NP_067653.3	C12orf10	60314	UPF0160 protein MYG1, mitochondrial precursor	0	38.548	22	8	36	8	1	376	42.4	6.67	111.63	8
555290023	NP_001273120.1	C12orf43	64897	uncharacterized protein C12orf43 isoform a	0	12.29	15	2	6	2	1	293	31.7	9.32	30.36	2
19923951	NP_612434.1	C12orf57	113246	protein C10 isoform 1	0	10.428	22	2	8	2	1	126	13.2	5.14	30.2	2
22748627	NP_689482.1	C12orf65	91574	probable peptide chain release factor C12orf65, mitochondrial	0.012	2.584	5	1	3	1	1	166	18.8	9.8	7.73	1
110227846	NP_115879.2	C14orf142	84520	uncharacterized protein C14orf142	0	20.671	51	3	38	3	1	100	10.9	4.27	118.25	3	Acetyl [N-Term]
7706322	NP_057123.1	C14orf166	51637	UPF0568 protein C14orf166	0	18.789	24	5	16	5	1	244	28.1	6.65	36.36	5
106879206	NP_078920.2	C14orf169	79697	bifunctional lysine-specific demethylase and histidyl-hydroxylase NO66	0.004	4.017	3	1	4	1	1	641	71	6.46	9.65	1
1012306339	NP_001308690.1	C15orf41	84529	uncharacterized protein C15orf41 isoform 7	0.002	4.804	5	1	2	1	1	287	32.9	6.62	7.51	1
767987757	XP_011521015.1	C16orf13	84326	PREDICTED: UPF0585 protein C16orf13 isoform X1	0	19.695	19	4	9	4	1	271	29.5	7.99	31.17	4	Acetyl [N-Term]
47824889	NP_001001436.1	C16orf87	388272	UPF0547 protein C16orf87	0.008	2.957	9	1	3	1	1	154	17.8	10.07	1.6	1
440309863	NP_001258980.1	C16orf91	283951	protein CCSMST1 precursor	0	12.033	35	2	4	2	1	132	15	7.02	19.42	2
45505147	NP_071739.2	C17orf75	64149	protein Njmu-R1	0.002	4.921	3	1	1	1	1	396	44.6	5.03	3.64	1
1034600316	XP_016880295.1	C17orf80	55028	PREDICTED: uncharacterized protein C17orf80 isoform X1	0	7.476	4	2	3	2	1	609	67.3	9.16	6.87	2
147900223	NP_001079990.1	C17orf89	284184	uncharacterized protein C17orf89	0.002	5.227	18	1	1	1	1	74	7.8	9.32	3.56	1
89242141	NP_037458.3	C18orf8	29919	uncharacterized protein C18orf8 isoform 1	0.003	4.404	2	1	1	1	1	657	74.9	7.83	2.43	1
1034606445	XP_016881863.1	C19orf25	148223	PREDICTED: UPF0449 protein C19orf25 isoform X1	0	6.289	11	1	5	1	1	161	17.2	4.96	18.08	1
13128992	NP_076943.1	C19orf43	79002	uncharacterized protein C19orf43	0	36.246	40	5	25	5	1	176	18.4	9.44	115.87	5
374248661	NP_001243369.1	C19orf47	126526	uncharacterized protein C19orf47 isoform 1 precursor	0	9.154	9	3	7	3	1	422	44.7	10.11	21.36	3
24308410	NP_612367.1	C19orf52	90580	uncharacterized protein C19orf52	0	6.748	8	2	5	2	1	260	29.2	8.09	18.76	2
7661742	NP_054766.1	C19orf53	28974	leydig cell tumor 10 kDa protein homolog	0	6.124	16	2	6	2	1	99	10.6	11.55	14.41	2
1034606076	XP_016881737.1	C19orf70	125988	PREDICTED: MICOS complex subunit MIC13 isoform X1	0	8.189	8	1	11	1	1	140	15.4	9.03	39.23	1
23097329	NP_689905.1	C1GALT1C1	29071	C1GALT1-specific chaperone 1	0.025	1.9	7	1	1	1	1	318	36.4	6.84	2.8	1
8923541	NP_060357.1	C1orf123	54987	UPF0587 protein C1orf123 isoform 1	0	13.53	30	3	15	3	1	160	18	5.01	44.94	3
63497679	NP_689592.2	C1orf131	128061	uncharacterized protein C1orf131 isoform a	0	9.888	15	2	6	2	1	293	32.6	9.88	18.79	2
224591399	NP_997239.2	C1orf174	339448	UPF0688 protein C1orf174	0	11.433	13	2	12	2	1	243	26	6.9	38.37	2
14249478	NP_116189.1	C1orf198	84886	uncharacterized protein C1orf198 isoform 1	0.008	3.181	4	1	1	1	1	327	36.3	5.72	2.35	1
13540596	NP_110433.1	C1orf21	81563	uncharacterized protein C1orf21	0.046	1.446	12	1	1	1	1	121	13.9	5.22	0	1
13236559	NP_077295.1	C1orf35	79169	multiple myeloma tumor-associated protein 2	0	19.863	24	5	16	5	1	263	29.4	10.02	45.34	5
187155251	NP_077002.2	C1orf50	79078	uncharacterized protein C1orf50	0.003	4.424	8	1	2	1	1	199	21.9	5.88	6.8	1	Acetyl [N-Term]
37620206	NP_932343.1	C1orf52	148423	UPF0690 protein C1orf52	0	8.419	23	3	6	3	1	182	20.6	5.21	11.26	3
4502491	NP_001203.1	C1QBP	708	complement component 1 Q subcomponent-binding protein, mitochondrial precursor	0	10.903	14	2	7	2	1	282	31.3	4.84	23.68	2
85362737	NP_001034229.1	C20orf27	54976	UPF0687 protein C20orf27 isoform 1	0.002	4.958	7	1	11	1	1	199	21.6	7.37	36.01	1
1034582490	XP_016875753.1	C2CD5	9847	PREDICTED: C2 domain-containing protein 5 isoform X1	0.002	5.098	1	1	3	1	1	1161	127.9	6.25	10.59	1
239582772	NP_078796.2	C2orf47	79568	uncharacterized protein C2orf47, mitochondrial precursor	0.002	5.214	5	1	6	1	1	291	32.5	9.17	17.52	1
197333715	NP_776185.2	C3orf38	285237	uncharacterized protein C3orf38	0.03	1.806	2	1	1	1	1	329	37.5	6.47	2.39	1
27734895	NP_775823.1	C3orf58	205428	deleted in autism protein 1 isoform a precursor	0.044	1.518	3	1	1	1	1	430	49.5	8.53	0	1
154240673	NP_001001701.2	C4orf3	401152	uncharacterized protein C4orf3 isoform 2	0.002	4.703	17	1	7	1	1	66	7.6	5.29	17.44	1	Acetyl [N-Term]
51896031	NP_787117.3	C5orf51	285636	UPF0600 protein C5orf51	0	6.078	7	1	3	1	1	294	33.6	5.26	11.98	1
578809986	XP_006714559.1	C6	729	PREDICTED: complement component C6 isoform X2	0.082	1.097	4	1	1	1	1	962	107.7	6.79	0	1
13236514	NP_077270.1	C6orf106	64771	uncharacterized protein C6orf106 isoform a	0.003	4.629	7	1	1	1	1	298	32.9	4.58	3.95	1
57165366	NP_067007.3	C6orf47	57827	uncharacterized protein C6orf47	0.029	1.83	7	1	1	1	1	294	31.7	6.37	2.67	1
153792791	NP_001093328.1	C7orf25	79020	UPF0415 protein C7orf25 isoform a	0.008	3.052	2	1	1	1	1	479	52.5	6.96	2.04	1
767945958	XP_011513885.1	C7orf50	84310	PREDICTED: uncharacterized protein C7orf50 isoform X4	0	21.764	36	4	12	4	1	225	25.2	9.64	51.97	4
12751497	NP_075568.1	C8orf33	65265	UPF0488 protein C8orf33	0	16.055	16	2	13	2	1	229	25	9.95	44.61	2
767951782	XP_011515830.1	C8orf59	401466	PREDICTED: uncharacterized protein C8orf59 isoform X1	0.002	4.692	18	2	2	2	1	100	11.4	10.46	4.55	2
49169841	NP_001001795.1	C8orf82	414919	UPF0598 protein C8orf82	0	6.342	8	1	5	1	1	216	23.9	9.14	17.79	1
1034670332	XP_016870293.1	C9orf114	51490	PREDICTED: putative methyltransferase C9orf114 isoform X1	0.004	4.133	2	1	3	1	1	458	50.6	8.35	6.76	1
157388941	NP_060468.2	C9orf40	55071	uncharacterized protein C9orf40	0	8.869	28	2	2	2	1	194	21.1	5.01	7.27	2
110815802	NP_115683.3	C9orf64	84267	UPF0553 protein C9orf64 isoform 1	0	22.72	20	7	23	7	1	341	39	5.88	70.62	7	Acetyl [N-Term]
7706557	NP_057604.1	C9orf78	51759	uncharacterized protein C9orf78	0	14.907	10	3	9	3	1	289	33.7	6.74	26.21	3
22027500	NP_004047.3	CA8	767	carbonic anhydrase-related protein isoform a	0	20.514	26	5	23	5	1	290	33	4.86	69.59	5
530419692	XP_005261472.1	CABIN1	23523	PREDICTED: calcineurin-binding protein cabin-1 isoform X1	0	8.105	3	4	6	4	1	2255	249.9	6.18	11.68	4
530412805	XP_005257702.1	CACNB1	782	PREDICTED: voltage-dependent L-type calcium channel subunit beta-1 isoform X1	0.032	1.765	1	1	4	1	1	643	70.5	5.92	0	1
122937392	NP_001074012.1	CACTIN	58509	cactin	0	15.842	6	3	8	3	1	758	88.6	9.14	33.98	3
7656952	NP_055227.1	CACYBP	27101	calcyclin-binding protein isoform 1	0	119.583	51	14	147	14	1	228	26.2	8.25	581.71	14
18105007	NP_004332.2	CAD	790	CAD protein isoform 1	0	187.358	17	34	219	34	1	2225	242.8	6.46	759.45	34
779176942	NP_001292553.1	CALM2	805	calmodulin isoform 1	0	44.544	25	5	60	5	1	197	22.2	4.63	249.12	5
4757900	NP_004334.1	CALR	811	calreticulin precursor	0	135.628	34	16	285	16	1	417	48.1	4.44	1141.25	16
314122177	NP_001186600.1	CALU	813	calumenin isoform c precursor	0	27.259	13	4	26	4	1	323	38	4.63	91.97	4
767945863	XP_011513849.1	CAMK2B	816	PREDICTED: calcium/calmodulin-dependent protein kinase type II subunit beta isoform X1	0	16.646	6	3	18	3	1	709	77.2	7.2	51.87	3
1020738596	NP_001310303.1	CAMK4	814	calcium/calmodulin-dependent protein kinase type IV isoform 1	0	68.46	40	14	51	14	1	473	51.9	5.82	199.63	14
13376109	NP_079042.1	CAMKMT	79823	calmodulin-lysine N-methyltransferase	0.022	1.958	2	1	2	1	1	323	36.1	6.83	4.82	1
4502559	NP_001736.1	CAMLG	819	calcium signal-modulating cyclophilin ligand	0.008	3.019	3	1	1	1	1	296	32.9	8.05	2.78	1
530426604	XP_005263453.1	CAMSAP1	157922	PREDICTED: calmodulin-regulated spectrin-associated protein 1 isoform X1	0	7.423	2	2	3	2	1	1613	179.2	6.8	11.71	2
21361794	NP_060918.2	CAND1	55832	cullin-associated NEDD8-dissociated protein 1	0	170.871	26	30	250	30	1	1230	136.3	5.78	858.16	30
767938662	XP_011532966.1	CANX	821	PREDICTED: calnexin isoform X2	0	51.792	12	8	74	8	1	646	73.4	4.65	261.93	8
157649073	NP_001099000.1	CAP1	10487	adenylyl cyclase-associated protein 1	0	106.034	38	15	146	15	1	475	51.6	8.02	745.41	15
767968844	XP_011543594.1	CAPN1	823	PREDICTED: calpain-1 catalytic subunit isoform X1	0	34.705	14	9	47	9	1	714	81.8	5.67	128.93	9
530417335	XP_005259353.1	CAPNS1	826	PREDICTED: calpain small subunit 1 isoform X1	0	22.691	13	4	26	4	1	322	33.8	6.23	106.93	4
1034573714	XP_016873238.1	CAPRIN1	4076	PREDICTED: caprin-1 isoform X1	0	57.461	17	11	65	11	1	709	78.3	5.25	275.32	11
5453597	NP_006126.1	CAPZA1	829	F-actin-capping protein subunit alpha-1	0	61.156	42	10	162	8	1	286	32.9	5.69	544.11	10
5453599	NP_006127.1	CAPZA2	830	F-actin-capping protein subunit alpha-2	0	23.283	26	6	27	4	1	286	32.9	5.85	83.47	6
531990816	NP_001269091.1	CAPZB	832	F-actin-capping protein subunit beta isoform 4	0	103.294	46	13	114	13	1	301	33.8	6.43	470.16	13
1034594161	XP_005255285.3	CARHSP1	23589	PREDICTED: calcium-regulated heat stable protein 1 isoform X1	0	11.104	21	3	16	3	1	168	18.1	8.85	49.26	3
40288288	NP_954592.1	CARM1	10498	histone-arginine methyltransferase CARM1	0	12.596	3	2	6	2	1	608	65.8	6.73	14.61	2
66392157	NP_001013860.1	CARMIL2	146206	F-actin-uncapping protein RLTPR isoform 1	0	35.846	7	7	14	7	1	1435	154.6	6.76	48.2	7
22748889	NP_689633.1	CARNMT1	138199	carnosine N-methyltransferase isoform 1	0.004	3.727	2	1	3	1	1	409	47.2	6.32	5.92	1
62240992	NP_001014437.1	CARS	833	cysteine--tRNA ligase, cytoplasmic isoform c	0	41.372	11	8	44	8	1	831	94.6	6.83	152.09	8
13375695	NP_078813.1	CARS2	79587	probable cysteine--tRNA ligase, mitochondrial	0	5.96	3	1	2	1	1	564	62.2	8.34	11.21	1
530411800	XP_005257220.1	CASC3	22794	PREDICTED: protein CASC3 isoform X1	0	6.701	6	2	5	2	1	703	76.2	6.48	11.79	2
29826289	NP_612432.2	CASC4	113201	protein CASC4 isoform a	0.003	4.543	3	1	2	1	1	436	49.5	5.29	4.59	1
444299649	NP_733468.3	CASC5	57082	protein CASC5 isoform 1	0	7.97	1	2	3	2	1	2342	265.2	5.47	9.92	2
186972120	NP_003679.2	CASK	8573	peripheral plasma membrane protein CASK isoform 1	0.003	4.628	2	1	2	1	1	921	104.5	6.47	7.91	1
39995059	NP_116764.2	CASP2	835	caspase-2 isoform 1 preproprotein	0	24.498	17	6	9	6	1	452	50.7	6.81	27.86	6
767932779	XP_011530603.1	CASP3	836	PREDICTED: caspase-3 isoform X1	0	13.699	16	3	8	3	1	277	31.6	6.54	30.37	3
14916483	NP_001217.2	CASP6	839	caspase-6 isoform alpha precursor	0	15.446	14	3	10	3	1	293	33.3	6.93	36.23	3
15718698	NP_203124.1	CASP7	840	caspase-7 isoform delta	0	9.789	10	2	10	2	1	336	37.8	6.37	30.13	2
768018623	XP_011527403.1	CBFA2T2	9139	PREDICTED: protein CBFA2T2 isoform X4	0.054	1.341	2	1	1	1	1	614	67.9	7.83	2	1
13124873	NP_001746.1	CBFB	865	core-binding factor subunit beta isoform 2	0	21.913	20	4	24	4	1	182	21.5	6.6	101.62	4
52426745	NP_005179.2	CBL	867	E3 ubiquitin-protein ligase CBL	0	21.553	6	5	10	5	1	906	99.6	6.54	33.07	5
209180481	NP_079090.2	CBLL1	79872	E3 ubiquitin-protein ligase Hakai isoform 1	0	18.24	14	4	15	4	1	491	54.5	8.29	56.47	4	Acetyl [N-Term]
4502599	NP_001748.1	CBR1	873	carbonyl reductase [NADPH] 1 isoform 1	0	31.858	29	6	22	6	1	277	30.4	8.32	72.6	6
578809567	XP_006714454.1	CBR4	84869	PREDICTED: carbonyl reductase family member 4 isoform X1	0.002	4.937	6	1	3	1	1	247	26.6	9.64	9.77	1
768021841	XP_011528075.1	CBS	875	PREDICTED: cystathionine beta-synthase isoform X1	0.004	3.857	2	1	2	1	1	582	63.7	8.02	6.13	1
5803076	NP_006798.1	CBX1	10951	chromobox protein homolog 1	0	39.564	32	6	29	5	1	185	21.4	4.93	86.53	6
767996228	XP_011523684.1	CBX2	84733	PREDICTED: chromobox protein homolog 2 isoform X1	0	11.854	6	3	7	3	1	586	62	9.94	19.07	3
15082258	NP_009207.2	CBX3	11335	chromobox protein homolog 3	0	65	43	8	120	7	1	183	20.8	5.33	498.1	8
55770830	NP_003646.2	CBX4	8535	E3 SUMO-protein ligase CBX4	0	9.952	5	2	3	2	1	560	61.3	9.36	8.89	2
188035908	NP_001120793.1	CBX5	23468	chromobox protein homolog 5	0	44.474	37	8	73	8	1	191	22.2	5.86	267.01	8
10190682	NP_065700.1	CBX8	57332	chromobox protein homolog 8	0	10.931	11	2	5	2	1	389	43.4	9.91	14.08	2
96974985	NP_060191.3	CC2D1A	54862	coiled-coil and C2 domain-containing protein 1A	0	16.234	8	4	5	4	1	951	104	8.09	19.2	4
46852388	NP_060707.2	CCAR1	55749	cell division cycle and apoptosis regulator protein 1 isoform a	0	83.525	16	15	55	15	1	1150	132.7	5.76	204.31	15
24432106	NP_066997.3	CCAR2	57805	cell cycle and apoptosis regulator protein 2	0	129.891	31	24	201	24	1	923	102.8	5.22	777.86	24
27735133	NP_775781.1	CCDC117	150275	coiled-coil domain-containing protein 117 isoform a	0	6.592	8	2	6	2	1	279	30.5	5.07	12.91	2
459175660	NP_001264003.1	CCDC12	151903	coiled-coil domain-containing protein 12 2	0	10.42	24	2	10	2	1	166	19.2	7.34	38.15	2	Acetyl [N-Term]
19923969	NP_612451.1	CCDC124	115098	coiled-coil domain-containing protein 124	0	26.766	24	6	24	6	1	223	25.8	9.54	69.99	6
1001624508	NP_001307494.1	CCDC130	81576	coiled-coil domain-containing protein 130 isoform a	0.004	4.126	3	1	3	1	1	396	44.8	8.24	10.11	1
530420388	XP_005261805.1	CCDC134	79879	PREDICTED: coiled-coil domain-containing protein 134 isoform X1	0	11.676	19	3	9	3	1	229	26.5	8.85	22.01	3
40548332	NP_954981.1	CCDC137	339230	coiled-coil domain-containing protein 137	0.031	1.802	6	1	1	1	1	289	33.2	10.93	2.12	1
578803866	XP_006712407.1	CCDC138	165055	PREDICTED: coiled-coil domain-containing protein 138 isoform X1	0.033	1.739	1	1	3	1	1	671	76.8	8.53	1.64	1
108773808	NP_057558.3	CCDC174	51244	coiled-coil domain-containing protein 174	0.006	3.445	2	1	1	1	1	467	53.9	6.33	2.37	1
7661844	NP_054727.1	CCDC22	28952	coiled-coil domain-containing protein 22	0	8.758	6	2	6	2	1	627	70.7	6.74	15.3	2
108936950	NP_060716.2	CCDC25	55246	coiled-coil domain-containing protein 25 isoform 1	0	7.023	12	2	8	2	1	208	24.5	6.8	27.49	2
151101337	NP_653210.2	CCDC43	124808	coiled-coil domain-containing protein 43 isoform 1	0.009	2.644	5	1	1	1	1	224	25.2	4.92	2.24	1
171906582	NP_064583.2	CCDC47	57003	coiled-coil domain-containing protein 47 precursor	0	27.849	7	4	18	4	1	483	55.8	4.87	57.62	4
28372509	NP_777568.1	CCDC50	152137	coiled-coil domain-containing protein 50 short isoform	0	19.435	19	4	14	4	1	306	35.8	6.65	34.54	4
767924298	XP_011532415.1	CCDC51	79714	PREDICTED: coiled-coil domain-containing protein 51 isoform X1	0	6.878	5	1	2	1	1	431	48.1	8.51	9.03	1
7705622	NP_057137.1	CCDC53	51019	WASH complex subunit CCDC53 isoform 1	0.003	4.354	6	1	3	1	1	194	21.2	4.46	6.64	1
62988355	NP_001017928.1	CCDC58	131076	coiled-coil domain-containing protein 58 isoform 1	0	29.834	42	5	23	5	1	144	16.6	7.81	86.85	5
156142178	NP_054886.2	CCDC59	29080	thyroid transcription factor 1-associated protein 26	0	8.69	11	2	5	2	1	241	28.7	9.88	13.15	2
46852390	NP_005427.2	CCDC6	8030	coiled-coil domain-containing protein 6	0	8.049	5	2	3	2	1	474	53.3	7.34	8.46	2
57242766	NP_787080.2	CCDC71L	168455	coiled-coil domain-containing protein 71L	0.004	3.714	6	1	2	1	1	235	26.2	11.71	5.33	1
38348292	NP_940891.1	CCDC84	338657	coiled-coil domain-containing protein 84	0	5.385	6	1	2	1	1	332	38	8.22	6.32	1
13129104	NP_077003.1	CCDC86	79080	coiled-coil domain-containing protein 86	0	32.596	27	6	19	6	1	360	40.2	10.33	71.62	6
530367810	XP_005264475.1	CCDC88A	55704	PREDICTED: girdin isoform X1	0.004	3.653	1	1	1	1	1	2027	233	6.02	2.79	1
1034607183	XP_016882067.1	CCDC9	26093	PREDICTED: coiled-coil domain-containing protein 9 isoform X1	0	6.566	5	2	4	2	1	531	59.7	5.4	7.86	2
20149663	NP_068597.2	CCDC90B	60492	coiled-coil domain-containing protein 90B, mitochondrial isoform 1 precursor	0.08	1.125	4	1	1	1	1	254	29.5	7.55	0	1
767918576	XP_011509661.1	CCDC93	54520	PREDICTED: coiled-coil domain-containing protein 93 isoform X1	0	10.291	5	2	7	2	1	686	78.3	8.75	23.42	2
31542652	NP_060544.2	CCDC94	55702	coiled-coil domain-containing protein 94	0	17.157	13	4	8	4	1	323	37.1	5.92	23.84	4
4502613	NP_001228.1	CCNA2	890	cyclin-A2	0	8.438	9	2	13	2	1	432	48.5	6.54	26.87	2	Acetyl [N-Term]
14327896	NP_114172.1	CCNB1	891	G2/mitotic-specific cyclin-B1	0	14.103	13	3	16	3	1	433	48.3	7.47	49.41	3
4757930	NP_004692.1	CCNB2	9133	G2/mitotic-specific cyclin-B2	0	5.711	5	1	3	1	1	398	45.3	8.9	15.41	1
4502619	NP_001751.1	CCND3	896	G1/S-specific cyclin-D3 isoform 2	0	14.42	15	3	5	3	1	292	32.5	7.06	18.04	3	Acetyl [N-Term]
530379554	XP_005248684.1	CCNH	902	PREDICTED: cyclin-H isoform X1	0.006	3.307	4	1	2	1	1	329	38.3	8.56	2.34	1
564730488	NP_001274181.1	CCNI2	645121	cyclin-I2 isoform 1	0.04	1.63	2	1	1	1	1	385	42.4	8.03	2.71	1
767981785	XP_011535577.1	CCNK	8812	PREDICTED: cyclin-K isoform X1	0	16.213	7	2	5	2	1	580	64.2	8.41	26.18	2
9945320	NP_064703.1	CCNL1	57018	cyclin-L1 isoform 1	0.003	4.616	4	1	1	1	1	526	59.6	10.7	2.83	1
17978466	NP_001231.2	CCNT1	904	cyclin-T1 isoform a	0	25.777	13	5	13	5	1	726	80.6	8.78	71.25	5
17978469	NP_490595.1	CCNT2	905	cyclin-T2 isoform b	0.003	4.528	2	1	1	1	1	730	81	8.92	3.37	1
32171247	NP_659449.3	CCNY	219771	cyclin-Y isoform 1	0.008	3.038	5	1	3	1	1	341	39.3	7.2	8.03	1
5453603	NP_006422.1	CCT2	10576	T-complex protein 1 subunit beta isoform 1	0	152.796	41	18	262	18	1	535	57.5	6.46	1039.99	18
63162572	NP_005989.3	CCT3	7203	T-complex protein 1 subunit gamma isoform a	0	177.74	57	31	397	31	1	545	60.5	6.49	1236.72	31
38455427	NP_006421.2	CCT4	10575	T-complex protein 1 subunit delta isoform a	0	176.469	42	23	334	22	1	539	57.9	7.83	1189.37	23
24307939	NP_036205.1	CCT5	22948	T-complex protein 1 subunit epsilon isoform a	0	149.234	35	22	293	21	1	541	59.6	5.66	1018.18	22
4502643	NP_001753.1	CCT6A	908	T-complex protein 1 subunit zeta isoform a	0	119.387	27	17	206	13	1	531	58	6.68	712.59	17
58331173	NP_006575.2	CCT6B	10693	T-complex protein 1 subunit zeta-2 isoform 1	0	24.995	9	5	42	1	1	530	57.8	7.24	120.71	5
5453607	NP_006420.1	CCT7	10574	T-complex protein 1 subunit eta isoform a	0	108.701	36	19	298	19	1	543	59.3	7.65	844.13	19	Acetyl [N-Term]
48762932	NP_006576.2	CCT8	10694	T-complex protein 1 subunit theta isoform 1	0	237.821	56	34	410	34	1	548	59.6	5.6	1509.43	34
56699480	NP_056437.4	CCZ1	51622	vacuolar fusion protein CCZ1 homolog	0	13.408	9	4	7	4	1	482	55.8	6.48	14.15	4
115529484	NP_598000.2	CD109	135228	CD109 antigen isoform 1 preproprotein	0.003	4.572	1	1	1	1	1	1445	161.6	5.85	3.25	1
4502645	NP_001755.1	CD1B	910	T-cell surface glycoprotein CD1b precursor	0	13.372	11	3	15	3	1	333	36.9	6.29	45.67	3
110618240	NP_112155.2	CD1E	913	T-cell surface glycoprotein CD1e, membrane-associated isoform a precursor	0	6.733	9	2	5	2	1	388	43.6	8.57	13.76	2
767920657	XP_011510496.1	CD28	940	PREDICTED: T-cell-specific surface glycoprotein CD28 isoform X1	0	9.875	12	3	9	3	1	234	26.2	8.92	24.62	3
11321634	NP_036252.1	CD2AP	23607	CD2-associated protein	0	46.359	18	10	41	10	1	639	71.4	6.4	151.66	10
5174409	NP_006101.1	CD2BP2	10421	CD2 antigen cytoplasmic tail-binding protein 2	0	36.098	23	7	37	7	1	341	37.6	4.61	107.1	7
7706111	NP_057663.1	CD320	51293	CD320 antigen isoform 1 precursor	0.002	4.86	4	1	5	1	1	282	29	4.75	14.15	1
38454326	NP_001766.2	CD38	952	ADP-ribosyl cyclase/cyclic ADP-ribose hydrolase 1	0.004	4.192	4	1	2	1	1	300	34.3	7.66	4.81	1
4502669	NP_000723.1	CD3D	915	T-cell surface glycoprotein CD3 delta chain isoform A precursor	0	5.305	7	1	8	1	1	171	18.9	5.54	34.18	1
4502671	NP_000724.1	CD3E	916	T-cell surface glycoprotein CD3 epsilon chain precursor	0	7.695	12	2	17	2	1	207	23.1	6.76	50.87	2
6912246	NP_036231.1	CD3EAP	10849	DNA-directed RNA polymerase I subunit RPA34 isoform 2	0	47.728	35	8	28	8	1	510	55	8.51	109.26	8	Acetyl [N-Term]
10835167	NP_000607.1	CD4	920	T-cell surface glycoprotein CD4 isoform 1 precursor	0	10.209	7	3	4	3	1	458	51.1	9.54	11.21	3
4502673	NP_001768.1	CD47	961	leukocyte surface antigen CD47 isoform 1 precursor	0	6.957	6	2	6	2	1	323	35.2	7.21	14.59	2
166197668	NP_055022.2	CD5	921	T-cell surface glycoprotein CD5 precursor	0	37.252	20	8	25	8	1	495	54.5	8.21	78.86	8
665505989	NP_001287831.1	CD55	1604	complement decay-accelerating factor isoform 5 precursor	0	5.325	4	2	2	2	1	444	49.3	8.82	4.54	2
187829070	NP_001120697.1	CD59	966	CD59 glycoprotein preproprotein	0	13.406	19	2	11	2	1	128	14.2	6.48	31.5	2
4757944	NP_004347.1	CD81	975	CD81 antigen isoform 1	0	6.021	8	1	3	1	1	236	25.8	5.29	11.5	1
767915402	XP_011531466.1	CD8B	926	PREDICTED: T-cell surface glycoprotein CD8 beta chain isoform X1	0	7.973	5	1	6	1	1	246	27.7	9.69	17.31	1
4505183	NP_002405.1	CD99	4267	CD99 antigen isoform a precursor	0.003	4.543	5	1	3	1	1	185	18.8	4.75	7.62	1
767983404	XP_011519572.1	CDAN1	146059	PREDICTED: codanin-1 isoform X1	0.069	1.221	1	1	2	1	1	1236	135	6.92	4.58	1
221316620	NP_006014.2	CDC123	8872	cell division cycle protein 123 homolog	0.01	2.599	3	1	1	1	1	336	39.1	4.81	0	1
118402580	NP_003894.3	CDC16	8881	cell division cycle protein 16 homolog isoform 1	0	11.469	7	3	9	3	1	620	71.6	5.85	27.3	3
118402582	NP_001246.2	CDC20	991	cell division cycle protein 20 homolog	0	6.719	4	1	3	1	1	499	54.7	9.23	14.54	1
118402596	NP_004652.2	CDC23	8697	cell division cycle protein 23 homolog	0	9.249	9	3	12	3	1	597	68.8	7.02	12.02	3
167466177	NP_001107563.1	CDC27	996	cell division cycle protein 27 homolog isoform 1	0.01	2.598	4	1	1	1	1	830	92.6	7.12	0	1
5901922	NP_008996.1	CDC37	11140	hsp90 co-chaperone Cdc37	0	125.612	47	18	160	18	1	378	44.4	5.25	617.98	18
66773038	NP_060383.2	CDC37L1	55664	hsp90 co-chaperone Cdc37-like 1	0.013	2.407	3	1	1	1	1	337	38.8	5.34	2.68	1
7706657	NP_056975.1	CDC40	51362	pre-mRNA-processing factor 17	0.002	5.109	4	1	3	1	1	579	65.5	7.06	9.82	1
4757952	NP_001782.1	CDC42	998	cell division control protein 42 homolog isoform 1 precursor	0	27.066	23	4	57	3	1	191	21.2	6.55	171.53	4
1034645484	XP_016865137.1	CDC42SE2	56990	PREDICTED: CDC42 small effector protein 2 isoform X1	0.003	4.614	23	1	1	1	1	84	9.2	8.35	2.34	1
11067747	NP_001244.1	CDC5L	988	cell division cycle 5-like protein	0	123.706	31	23	118	23	1	802	92.2	8.18	369.12	23
4502715	NP_003494.1	CDC7	8317	cell division cycle 7-related protein kinase	0	6.685	3	1	3	1	1	574	63.8	8.73	14.18	1
40018640	NP_078805.3	CDC73	79577	parafibromin	0	14.381	9	5	14	5	1	531	60.5	9.61	43.14	5
767950603	XP_011542719.1	CDCA2	157313	PREDICTED: cell division cycle-associated protein 2 isoform X1	0.003	4.313	1	1	1	1	1	1052	115.6	8.31	2.14	1
13876384	NP_112589.1	CDCA3	83461	cell division cycle-associated protein 3 isoform 1	0	15.197	16	3	6	3	1	268	29	6.43	28.63	3
530396238	XP_005273790.1	CDCA5	113130	PREDICTED: sororin isoform X1	0	29.808	17	5	21	5	1	467	51.3	8.75	102.01	5
31542537	NP_061189.2	CDCA7L	55536	cell division cycle-associated 7-like protein isoform 1	0	22.908	14	6	17	6	1	454	52.2	5.74	41.55	6
379056369	NP_001243804.1	CDCA8	55143	borealin	0	13.43	11	3	7	3	1	280	31.3	9.86	19.48	3
767964230	XP_011538639.1	CDHR1	92211	PREDICTED: cadherin-related family member 1 isoform X1	0.07	1.202	1	1	7	1	1	917	99.3	5.45	1.61	1
530407452	XP_005255095.1	CDIPT	10423	PREDICTED: CDP-diacylglycerol--inositol 3-phosphatidyltransferase isoform X1	0.004	3.668	5	1	5	1	1	237	25.9	8.22	14.38	1
1004170672	NP_001307847.1	CDK1	983	cyclin-dependent kinase 1 isoform 1	0	63.634	36	11	86	10	1	297	34.1	8.4	314.67	11	Acetyl [N-Term]
767906900	XP_011540793.1	CDK11B	984	PREDICTED: cyclin-dependent kinase 11B isoform X1	0	51.735	17	13	59	13	1	804	93.5	5.54	143.13	13
157817023	NP_057591.2	CDK12	51755	cyclin-dependent kinase 12 isoform 1	0	24.219	6	6	29	5	1	1490	164.1	9.44	81.86	6
145309302	NP_003709.3	CDK13	8621	cyclin-dependent kinase 13 isoform 1	0	20.591	4	5	30	4	1	1512	164.8	9.69	86.34	5
767972772	XP_011536034.1	CDK2	1017	PREDICTED: cyclin-dependent kinase 2 isoform X1	0	38.281	22	6	49	5	1	346	39.2	8.62	153.8	6
4758188	NP_004633.1	CDK2AP1	8099	cyclin-dependent kinase 2-associated protein 1 isoform 1	0	7.294	30	2	6	2	1	115	12.4	9.38	15.69	2
4502735	NP_000066.1	CDK4	1019	cyclin-dependent kinase 4	0.002	4.987	8	2	22	1	1	303	33.7	7.01	61.09	2
4826675	NP_004926.1	CDK5	1020	cyclin-dependent-like kinase 5 isoform 1	0	31.737	23	6	46	5	1	292	33.3	7.66	136.71	6
58535451	NP_060719.4	CDK5RAP2	55755	CDK5 regulatory subunit-associated protein 2 isoform a	0.003	4.534	1	1	1	1	1	1893	214.9	5.58	3.07	1
503774379	NP_001265126.1	CDK5RAP3	80279	CDK5 regulatory subunit-associated protein 3 isoform c	0	29.153	15	7	27	7	1	531	59.6	4.92	73.99	7
4502741	NP_001250.1	CDK6	1021	cyclin-dependent kinase 6	0	77.879	53	14	118	13	1	326	36.9	6.46	420.06	14	Acetyl [N-Term]
4502743	NP_001790.1	CDK7	1022	cyclin-dependent kinase 7 isoform 1	0.004	3.955	4	1	1	1	1	346	39	8.47	2.75	1
4502747	NP_001252.1	CDK9	1025	cyclin-dependent kinase 9	0	14.236	11	3	29	2	1	372	42.8	8.79	92.59	3
93277076	NP_060244.2	CDKAL1	54901	threonylcarbamoyladenosine tRNA methylthiotransferase	0	10.334	8	3	5	3	1	579	65.1	7.46	12.27	3
767914448	XP_011531119.1	CDKL4	344387	PREDICTED: cyclin-dependent kinase-like 4 isoform X2	0.083	1.077	4	1	3	1	1	301	34.7	9.26	0	1
4507281	NP_003150.1	CDKL5	6792	cyclin-dependent kinase-like 5 isoform 1	0.003	4.538	2	2	5	2	1	1030	115.5	9.54	9.23	2
8923040	NP_060102.1	CDKN2AIP	55602	CDKN2A-interacting protein isoform 1	0	56.991	32	12	36	12	1	580	61.1	9.01	117.54	12
17981699	NP_523240.1	CDKN2C	1031	cyclin-dependent kinase 4 inhibitor C	0.002	5.122	11	2	3	2	1	168	18.1	6.52	7.36	2
20143480	NP_003809.1	CDS2	8760	phosphatidate cytidylyltransferase 2	0	6.433	4	1	3	1	1	445	51.4	7.09	13.83	1
188497689	NP_112190.2	CDT1	81620	DNA replication factor Cdt1	0.004	3.84	2	1	2	1	1	546	60.4	9.77	5.73	1
530374895	XP_005247645.1	CDV3	55573	PREDICTED: protein CDV3 homolog isoform X1	0	76.786	53	10	86	10	1	259	27.5	6.4	354.81	10
221307494	NP_004815.3	CDYL	9425	chromodomain Y-like protein isoform a	0	5.314	2	1	6	1	1	544	60.6	9.16	23.31	1
28872798	NP_005186.2	CEBPD	1052	CCAAT/enhancer-binding protein delta	0.068	1.239	6	1	1	1	1	269	28.4	8.28	2.7	1
42542392	NP_005751.2	CEBPZ	10153	CCAAT/enhancer-binding protein zeta	0	23.543	6	5	9	5	1	1054	120.9	5.94	35.17	5
14861834	NP_149061.1	CECR5	27440	cat eye syndrome critical region protein 5 isoform 2 precursor	0	31.126	13	4	24	4	1	423	46.3	8.13	100.29	4
767965289	XP_011518154.1	CELF1	10658	PREDICTED: CUGBP Elav-like family member 1 isoform X1	0	50.206	14	7	65	5	1	514	55.1	8.38	236.31	7
1034566092	XP_016871032.1	CELF2	10659	PREDICTED: CUGBP Elav-like family member 2 isoform X2	0	47.647	14	6	52	4	1	525	56.1	8.6	172.16	6
21735415	NP_001801.1	CENPB	1059	major centromere autoantigen B	0	8.573	4	2	7	2	1	599	65.1	4.55	24.94	2
68508961	NP_001803.2	CENPC	1060	centromere protein C	0.002	4.698	1	1	1	1	1	943	106.8	9.39	3.7	1
71061468	NP_001804.2	CENPE	1062	centromere-associated protein E isoform 1 precursor	0.044	1.517	1	1	1	1	1	2701	316.2	5.64	3.51	1
1034554801	XP_016855575.1	CENPF	1063	PREDICTED: centromere protein F isoform X1	0	11.897	1	3	5	3	1	3114	357.3	5.1	13.39	3
12597655	NP_075060.1	CENPH	64946	centromere protein H	0	18.739	20	3	12	3	1	247	28.5	5.29	35.98	3	Acetyl [N-Term]
1015139376	NP_001309030.1	CENPO	79172	centromere protein O isoform 1	0	5.45	5	1	3	1	1	300	33.8	7.71	15.02	1	Acetyl [N-Term]
767932631	XP_005263275.2	CENPU	79682	PREDICTED: centromere protein U isoform X1	0	17.944	9	3	5	3	1	448	50.6	9.06	15.44	3
56118234	NP_859067.2	CENPV	201161	centromere protein V	0	47.379	40	7	51	7	1	272	29.7	9.73	224.5	7
767994131	XP_011522857.1	CEP131	22994	PREDICTED: centrosomal protein of 131 kDa isoform X1	0	31.789	11	8	12	8	1	1088	122.7	8.76	36.22	8
578802413	XP_006711906.1	CEP170	9859	PREDICTED: centrosomal protein of 170 kDa isoform X1	0	20.715	4	4	8	4	1	1656	183.2	7.2	29.07	4
767911010	XP_011508493.1	CEP350	9857	PREDICTED: centrosome-associated protein 350 isoform X1	0.002	5.02	1	2	2	2	1	3189	358.7	6.38	5.31	2
16306479	NP_061188.1	CEP41	95681	centrosomal protein of 41 kDa isoform 1	0	12.772	13	4	8	4	1	373	41.3	8.32	27.48	4
154800457	NP_055962.2	CEP68	23177	centrosomal protein of 68 kDa isoform a	0.04	1.643	1	1	1	1	1	757	81.1	5.16	2.84	1
149274621	NP_001092272.1	CEP78	84131	centrosomal protein of 78 kDa isoform a	0	18.391	9	4	7	4	1	722	80	8.31	19.72	4
40538794	NP_073615.2	CEP85	64793	centrosomal protein of 85 kDa isoform 1	0.002	4.702	2	2	8	2	1	762	85.6	6	19.85	2
56118223	NP_001007795.1	CEPT1	10390	choline/ethanolaminephosphotransferase 1	0.006	3.433	3	1	7	1	1	416	46.5	8.21	12.54	1
767909065	XP_011507753.1	CERS2	29956	PREDICTED: ceramide synthase 2 isoform X1	0	5.93	4	1	1	1	1	400	47	8.85	5.01	1
4757902	NP_004335.1	CETN2	1069	centrin-2	0	19.927	23	3	9	3	1	172	19.7	5	37.16	3
8392875	NP_037374.1	CFAP20	29105	cilia- and flagella-associated protein 20	0	8.754	15	3	16	3	1	193	22.8	9.76	39.85	3
544346156	NP_001269690.1	CFAP36	112942	cilia- and flagella-associated protein 36 isoform a	0	9.718	11	3	4	3	1	367	41.9	5.01	11.95	3
578807575	XP_006713759.1	CFAP44	55779	PREDICTED: cilia- and flagella-associated protein 44 isoform X1	0.004	3.69	0	1	9	1	1	1898	218.5	5.45	21.63	1
149944410	NP_065878.1	CFAP97	57587	cilia- and flagella-associated protein 97 isoform 1	0.003	4.571	2	1	2	1	1	532	59.4	9.06	5.81	1
5453567	NP_006315.1	CFDP1	10428	craniofacial development protein 1	0	5.469	15	2	2	2	1	299	33.6	4.81	2.81	2	Acetyl [N-Term]
5031635	NP_005498.1	CFL1	1072	cofilin-1	0	90.942	64	13	151	10	1	166	18.5	8.09	533.51	13
56550053	NP_003654.3	CGGBP1	8545	CGG triplet repeat-binding protein 1	0	18.037	29	4	20	4	1	167	18.8	8.95	51.6	4
56790287	NP_001008708.1	CHAC2	494143	putative glutathione-specific gamma-glutamylcyclotransferase 2	0.072	1.193	5	1	1	1	1	184	20.9	5.43	1.63	1
50513245	NP_005474.2	CHAF1A	10036	chromatin assembly factor 1 subunit A	0	58.697	18	13	70	13	1	956	106.8	5.94	188.3	13	Acetyl [N-Term]
4885105	NP_005432.1	CHAF1B	8208	chromatin assembly factor 1 subunit B	0	27.956	16	6	24	6	1	559	61.5	7.5	86.93	6
255918139	NP_001157616.1	CHAMP1	283489	chromosome alignment-maintaining phosphoprotein 1	0	50.205	18	13	49	13	1	812	89	8.44	132.27	13	Acetyl [N-Term]
42558252	NP_976043.1	CHCHD1	118487	coiled-coil-helix-coiled-coil-helix domain-containing protein 1	0.003	4.653	9	1	3	1	1	118	13.5	10.21	10.52	1
998614210	NP_001307256.1	CHCHD2	51142	coiled-coil-helix-coiled-coil-helix domain-containing protein 2 precursor isoform 1	0	5.998	8	1	9	1	1	168	17.7	10.01	41.54	1
953768340	NP_001304106.1	CHCHD3	54927	MICOS complex subunit MIC19 isoform 1	0	77.452	48	13	97	13	1	232	26.7	7.75	374.68	13
21389469	NP_653237.1	CHCHD4	131474	mitochondrial intermembrane space import and assembly protein 40 isoform 2	0	5.298	15	1	1	1	1	155	17.4	4.39	4.36	1
14150070	NP_115685.1	CHCHD5	84269	coiled-coil-helix-coiled-coil-helix domain-containing protein 5 isoform a	0	25.649	61	5	20	5	1	110	12.4	6.73	83.08	5	Acetyl [N-Term]
1002095820	NP_001307539.1	CHCHD6	84303	MICOS complex subunit MIC25 isoform 1	0	13.547	15	3	6	3	1	236	26.6	8.85	18.48	3
58761514	NP_001011668.1	CHCHD7	79145	coiled-coil-helix-coiled-coil-helix domain-containing protein 7 isoform b	0	10.822	16	1	4	1	1	110	13	9.06	16.16	1
530379653	XP_005271923.1	CHD1	1105	PREDICTED: chromodomain-helicase-DNA-binding protein 1 isoform X1	0	59.155	11	14	33	13	1	1798	207.3	7.23	112.49	14
373428660	NP_004275.4	CHD1L	9557	chromodomain-helicase-DNA-binding protein 1-like isoform 1	0	7.981	2	1	3	1	1	897	100.9	6.9	19.73	1
530409847	XP_005256484.1	CHD3	1107	PREDICTED: chromodomain-helicase-DNA-binding protein 3 isoform X1	0	74.377	10	15	58	11	1	2115	238.5	6.86	202.59	15
578822553	XP_006719021.1	CHD4	1108	PREDICTED: chromodomain-helicase-DNA-binding protein 4 isoform X1	0	190.417	16	26	220	22	1	1940	220.7	5.97	903.72	26
1034625937	XP_016883588.1	CHD6	84181	PREDICTED: chromodomain-helicase-DNA-binding protein 6 isoform X1	0	8.119	1	3	4	1	1	2716	305.1	6.2	5.95	3
767951833	XP_011515855.1	CHD7	55636	PREDICTED: chromodomain-helicase-DNA-binding protein 7 isoform X1	0	9.436	1	3	6	2	1	3027	339	6.23	15.46	3
282165704	NP_001164100.1	CHD8	57680	chromodomain-helicase-DNA-binding protein 8 isoform 1	0	41.682	5	10	19	8	1	2581	290.3	6.47	67.93	10
767969501	XP_011540863.1	CHEK1	1111	PREDICTED: serine/threonine-protein kinase Chk1 isoform X1	0	21.614	12	4	13	4	1	492	55.5	9.19	64.36	4
119226260	NP_006378.3	CHERP	10523	calcium homeostasis endoplasmic reticulum protein	0	51.824	18	13	33	13	1	916	103.6	9.04	104.65	13	Acetyl [N-Term]
239048792	NP_001154816.1	CHFR	55743	E3 ubiquitin-protein ligase CHFR isoform 1	0	5.544	5	2	2	2	1	664	73.3	6.04	4.78	2
68533255	NP_003991.2	CHI3L2	1117	chitinase-3-like protein 2 isoform a precursor	0.003	4.398	3	1	2	1	1	390	43.5	7.53	4.94	1
767966354	XP_011518601.1	CHID1	66005	PREDICTED: chitinase domain-containing protein 1 isoform X1	0	5.665	4	2	5	2	1	478	53.4	8.32	13.45	2
103485496	NP_002759.2	CHMP1A	5119	charged multivesicular body protein 1a isoform 2	0	10.369	13	3	11	3	1	196	21.7	8.06	32.85	3	Acetyl [N-Term]
767989950	XP_011521400.1	CHMP1A	5119	PREDICTED: charged multivesicular body protein 1a isoform X1	0.002	5.1	8	1	1	1	1	408	43.1	10.93	2.7	1	Acetyl [N-Term]
31542306	NP_065145.2	CHMP1B	57132	charged multivesicular body protein 1b	0.027	1.856	4	1	1	1	1	199	22.1	8.1	2.12	1
530416193	XP_005258803.1	CHMP2A	27243	PREDICTED: charged multivesicular body protein 2a isoform X1	0	11.939	7	1	3	1	1	265	29.6	6	14.34	1
767922905	XP_011531878.1	CHMP2B	25978	PREDICTED: charged multivesicular body protein 2b isoform X1	0.024	1.919	4	1	2	1	1	229	25.6	8.5	0	1
40548422	NP_054888.2	CHMP4A	29082	charged multivesicular body protein 4a	0	20.619	19	4	15	4	1	265	29.8	5.14	53.34	4
28827795	NP_789782.1	CHMP4B	128866	charged multivesicular body protein 4b	0	14.571	15	3	15	3	1	224	24.9	4.82	57.93	3
189409150	NP_057494.3	CHMP5	51510	charged multivesicular body protein 5 isoform 1	0	19.682	25	3	28	3	1	219	24.6	4.83	95.86	3
530412852	XP_005257725.1	CHMP6	79643	PREDICTED: charged multivesicular body protein 6 isoform X1	0	14.896	16	3	7	3	1	245	28.2	5.16	30.5	3
1034661955	XP_016869450.1	CHMP7	91782	PREDICTED: charged multivesicular body protein 7 isoform X1	0.043	1.559	2	1	2	1	1	495	55.9	5.43	4.48	1
221316566	NP_036256.2	CHORDC1	26973	cysteine and histidine-rich domain-containing protein 1 isoform a	0	68.777	36	9	58	9	1	332	37.5	7.87	225.24	9
6005731	NP_009167.1	CHP1	11261	calcineurin B homologous protein 1	0.004	3.673	6	1	2	1	1	195	22.4	5.1	5.11	1
8393116	NP_059140.1	CHRAC1	54108	chromatin accessibility complex protein 1	0	9.528	20	2	19	2	1	131	14.7	5.1	45.05	2
767983626	XP_011519666.1	CHSY1	22856	PREDICTED: chondroitin sulfate synthase 1 isoform X1	0.002	4.939	1	1	1	1	1	830	94.8	9.22	3.39	1
530408662	XP_005255528.1	CHTF18	63922	PREDICTED: chromosome transmission fidelity protein 18 homolog isoform X5	0	29.248	9	6	21	5	1	1003	110.1	7.23	73.56	6
89242126	NP_001034779.1	CHTF8	54921	chromosome transmission fidelity protein 8 homolog	0	5.372	15	1	4	1	1	121	13.3	8.18	15.54	1
767990107	XP_011521470.1	CHTF8	54921	PREDICTED: chromosome transmission fidelity protein 8 homolog isoform X1	0.043	1.567	1	1	3	1	1	524	51.4	12.41	5.66	1
331028739	NP_001193541.1	CHTOP	26097	chromatin target of PRMT1 protein isoform 2	0	19.885	17	3	16	3	1	249	26.5	12.23	51.19	3
1034566254	XP_016871100.1	CHUK	1147	PREDICTED: inhibitor of nuclear factor kappa-B kinase subunit alpha isoform X1	0	11.708	5	3	8	3	1	814	92.3	7.11	20.69	3
323276622	NP_001190992.1	CHURC1	91612	protein Churchill isoform 2	0	9.598	22	2	3	2	1	139	16.1	5.54	11.31	2
4757988	NP_004795.1	CIAO1	9391	probable cytosolic iron-sulfur protein assembly protein CIAO1	0	40.998	26	7	46	7	1	339	37.8	4.97	172.32	7
89274169	NP_064709.2	CIAPIN1	57019	anamorsin isoform 1	0	40.659	23	5	27	5	1	312	33.6	5.62	108.32	5
40068059	NP_004873.3	CIR1	9541	corepressor interacting with RBPJ 1	0	10.264	6	3	4	3	1	450	52.3	9.86	10.28	3
578832963	XP_006722700.1	CIRBP	1153	PREDICTED: cold-inducible RNA-binding protein isoform X2	0	16.638	16	3	63	3	1	172	18.6	9.51	222.45	3
1034568764	XP_016871898.1	CISD1	55847	PREDICTED: CDGSH iron-sulfur domain-containing protein 1 isoform X1	0	8.701	19	2	3	2	1	150	17.2	9.06	9.81	2
56605994	NP_001008389.1	CISD2	493856	CDGSH iron-sulfur domain-containing protein 2	0	10.455	21	3	13	3	1	135	15.3	9.61	30.28	3
767972895	XP_011536085.1	CIT	11113	PREDICTED: citron Rho-interacting kinase isoform X1	0	21.624	4	7	11	7	1	2084	238.2	6.64	21.7	7
384081600	NP_001244904.1	CIZ1	25792	cip1-interacting zinc finger protein isoform 5	0	35.938	13	8	17	8	1	954	106.2	6.74	55.05	8
148664201	NP_001091995.1	CKAP2	26586	cytoskeleton-associated protein 2 isoform 2	0	9.437	4	2	5	2	1	683	76.9	9.41	12.21	2
167466272	NP_689728.3	CKAP2L	150468	cytoskeleton-associated protein 2-like isoform 1	0	6.08	2	1	6	1	1	745	83.5	9.83	19.87	1
19920317	NP_006816.2	CKAP4	10970	cytoskeleton-associated protein 4	0	61.019	26	12	43	12	1	602	66	5.92	175.43	12
57164942	NP_001008938.1	CKAP5	9793	cytoskeleton-associated protein 5 isoform a	0	134.562	15	22	109	22	1	2032	225.4	7.8	445.07	22
4502857	NP_001817.1	CKS1B	1163	cyclin-dependent kinases regulatory subunit 1	0	20.901	33	2	23	2	1	79	9.7	8.94	70.6	2
4502859	NP_001818.1	CKS2	1164	cyclin-dependent kinases regulatory subunit 2	0	7.05	13	1	10	1	1	79	9.9	8.46	26.84	1
1034612641	XP_016859146.1	CLASP1	23332	PREDICTED: CLIP-associating protein 1 isoform X1	0	25.081	5	6	15	5	1	1588	174.7	8.35	52.31	6
578805836	XP_006713111.1	CLASP2	23122	PREDICTED: CLIP-associating protein 2 isoform X12	0	40.499	7	8	25	7	1	1532	167.7	8.41	83.21	8
768006209	XP_011524698.1	CLASRP	11129	PREDICTED: CLK4-associating serine/arginine rich protein isoform X1	0.004	4.223	2	1	1	1	1	700	79.9	10.39	4.33	1
54792782	NP_056041.1	CLEC16A	23274	protein CLEC16A isoform 1	0.083	1.09	1	1	4	1	1	1053	117.6	5.86	7.05	1
4758004	NP_004353.1	CLGN	1047	calmegin precursor	0.003	4.389	2	1	2	1	1	610	70	4.69	6.23	1
567757609	NP_001274523.1	CLIC1	1192	chloride intracellular channel protein 1	0	60.789	53	10	101	10	1	241	26.9	5.17	344.52	10
7330335	NP_039234.1	CLIC4	25932	chloride intracellular channel protein 4	0	24.777	12	3	19	3	1	253	28.8	5.59	74.94	3
7661968	NP_055481.1	CLINT1	9685	clathrin interactor 1 isoform 2	0	46.705	20	8	33	8	1	625	68.2	6.42	144.85	8
530401713	XP_005253650.1	CLIP1	6249	PREDICTED: CAP-Gly domain-containing linker protein 1 isoform X1	0	5.933	3	2	3	2	1	1440	162.4	5.36	4.9	2
1034589656	XP_016877395.1	CLK3	1198	PREDICTED: dual specificity protein kinase CLK3 isoform X2	0	6.236	3	2	4	2	1	669	77.1	10.11	10.72	2
4502891	NP_001284.1	CLNS1A	1207	methylosome subunit pICln isoform a	0	28.807	29	4	78	4	1	237	26.2	4.11	229.14	4
5803029	NP_006822.1	CLP1	10978	polyribonucleotide 5'-hydroxyl-kinase Clp1 isoform 1	0	7.966	5	2	4	2	1	425	47.6	6.62	5.62	2
13540606	NP_110440.1	CLPB	81570	caseinolytic peptidase B protein homolog isoform 1	0	18.015	6	4	12	4	1	707	78.7	9.01	55.14	4
5174419	NP_006003.1	CLPP	8192	ATP-dependent Clp protease proteolytic subunit, mitochondrial precursor	0	29.334	31	6	35	6	1	277	30.2	8.09	104.91	6
4502897	NP_001285.1	CLPTM1	1209	cleft lip and palate transmembrane protein 1 isoform 2	0.003	4.607	1	1	2	1	1	669	76	6.3	5.74	1
21359965	NP_110409.2	CLPTM1L	81037	cleft lip and palate transmembrane protein 1-like protein	0	9.804	2	2	5	2	1	538	62.2	8.56	15.83	2
7242140	NP_006651.2	CLPX	10845	ATP-dependent Clp protease ATP-binding subunit clpX-like, mitochondrial precursor	0	48.384	22	10	39	10	1	633	69.2	7.58	144.25	10
21735569	NP_071394.2	CLSPN	63967	claspin isoform 1	0	7.228	3	3	6	3	1	1339	151	4.82	11.19	3
4502899	NP_001824.1	CLTA	1211	clathrin light chain A isoform a	0	33.938	26	6	45	6	1	218	23.6	4.53	169.24	6
4502901	NP_001825.1	CLTB	1212	clathrin light chain B isoform a	0	51.121	30	8	33	8	1	211	23.2	4.69	136.46	8
530411491	XP_005257069.1	CLTC	1213	PREDICTED: clathrin heavy chain 1 isoform X1	0	232.079	25	39	340	39	1	1682	192.3	5.69	1165.07	39
87162455	NP_056044.3	CLUH	23277	clustered mitochondria protein homolog	0	80.703	19	16	49	16	1	1309	146.6	6.13	155.42	16
8923900	NP_061156.1	CMAS	55907	N-acylneuraminate cytidylyltransferase	0	24.292	14	5	12	5	1	434	48.3	7.93	43	5	Acetyl [N-Term]
1034595319	XP_016878950.1	CMC2	56942	PREDICTED: COX assembly mitochondrial protein 2 homolog isoform X1	0.016	2.234	5	1	2	1	1	205	22.7	8.91	4.86	1
194018550	NP_938204.2	CMIP	80790	C-Maf-inducing protein isoform C-Mip	0	7.567	4	2	6	2	1	773	86.3	6.7	13.5	2	Acetyl [N-Term]
7706497	NP_057392.1	CMPK1	51727	UMP-CMP kinase isoform a	0	28.098	19	4	51	4	1	228	25.8	7.97	158.48	4
269847744	NP_115735.2	CMSS1	84319	protein CMSS1 isoform 1	0	24.953	19	5	23	5	1	279	31.9	9.19	65.14	5
32130526	NP_853531.1	CMTM3	123920	CKLF-like MARVEL transmembrane domain-containing protein 3	0.022	1.977	15	1	3	1	1	182	19.7	4.56	0	1	Acetyl [N-Term]
24307983	NP_055865.1	CMTR1	23070	cap-specific mRNA (nucleoside-2'-O-)-methyltransferase 1	0	18.707	8	6	19	6	1	835	95.3	7.05	44.22	6
4827071	NP_003409.1	CNBP	7555	cellular nucleic acid-binding protein isoform 3	0	47.315	42	7	42	7	1	177	19.5	7.71	149.92	7
767998954	XP_011524374.1	CNDP2	55748	PREDICTED: cytosolic non-specific dipeptidase isoform X1	0	54.039	16	8	40	8	1	475	52.8	5.97	171	8
1034606194	XP_016881778.1	CNN1	1264	PREDICTED: calponin-1 isoform X1	0.062	1.286	6	1	1	1	1	363	41	9.42	2.6	1
4502923	NP_001830.1	CNN3	1266	calponin-3 isoform 1	0	12.322	10	3	7	3	1	329	36.4	6.05	18.2	3
42716275	NP_057368.3	CNOT1	23019	CCR4-NOT transcription complex subunit 1 isoform a	0	127.067	14	29	97	29	1	2376	266.8	7.11	265.7	29
376319250	NP_001243671.1	CNOT10	25904	CCR4-NOT transcription complex subunit 10 isoform 3	0	17.831	6	3	18	3	1	804	89.1	8.21	69.5	3
188497630	NP_060016.3	CNOT11	55571	CCR4-NOT transcription complex subunit 11	0.002	4.701	2	1	5	1	1	510	55.2	6.4	10.68	1
313482818	NP_001186231.1	CNOT2	4848	CCR4-NOT transcription complex subunit 2	0	7.405	5	2	8	2	1	540	59.7	7.66	24.33	2
1034646758	XP_016865540.1	CNOT8	9337	PREDICTED: CCR4-NOT transcription complex subunit 8 isoform X1	0	5.887	8	1	3	1	1	292	33.5	4.81	11.66	1
410515401	NP_001258563.1	CNOT9	9125	cell differentiation protein RCD1 homolog isoform 1	0	23.372	19	5	23	5	1	331	36.8	7.03	72.44	5	Acetyl [N-Term]
94721261	NP_149124.3	CNP	1267	2',3'-cyclic-nucleotide 3'-phosphodiesterase	0	33.06	16	7	20	7	1	421	47.5	9.07	65.29	7
7657176	NP_055070.1	CNPY2	10330	protein canopy homolog 2 isoform 1 precursor	0	32.606	31	4	28	4	1	182	20.6	4.92	113.25	4
974005396	NP_001305771.1	CNPY3	10695	protein canopy homolog 3 isoform 3 precursor	0	60.447	30	11	47	11	1	311	34.1	5.25	196.95	11
1034656253	XP_016867909.1	COA1	55744	PREDICTED: cytochrome c oxidase assembly factor 1 homolog isoform X1	0.009	2.81	7	1	1	1	1	147	16.7	9.55	2.98	1
94536771	NP_001035521.1	COA3	28958	cytochrome c oxidase assembly factor 3 homolog, mitochondrial	0.004	4.148	9	1	1	1	1	106	11.7	9.6	2.91	1
1034574116	XP_016873372.1	COA4	51287	PREDICTED: cytochrome c oxidase assembly factor 4 homolog, mitochondrial isoform X1	0.037	1.676	9	1	1	1	1	96	11.3	6.67	2.29	1
683524009	NP_001193570.2	COA6	388753	cytochrome c oxidase assembly factor 6 homolog isoform 2	0	27.347	27	4	26	4	1	155	18	10.1	98.1	4
282396088	NP_075565.2	COA7	65260	cytochrome c oxidase assembly factor 7	0	25.874	29	4	17	4	1	231	25.7	6.02	59.87	4
578831479	XP_006722179.1	COASY	80347	PREDICTED: bifunctional coenzyme A synthase isoform X4	0	32.066	8	4	25	4	1	593	65.3	7.64	97.88	4
21237783	NP_061184.1	COG1	9382	conserved oligomeric Golgi complex subunit 1	0.002	4.747	2	1	4	1	1	980	108.9	7.31	7.58	1
325197106	NP_113619.2	COG3	83548	conserved oligomeric Golgi complex subunit 3	0	7.464	3	2	3	2	1	828	94	5.57	9.22	2
118498354	NP_056201.2	COG4	25839	conserved oligomeric Golgi complex subunit 4 isoform 1	0	7.039	3	2	5	2	1	789	89.4	5.21	17.2	2
240849531	NP_006339.3	COG5	10466	conserved oligomeric Golgi complex subunit 5 isoform 1	0	11.632	5	3	7	3	1	860	94.8	6.6	22.22	3
767977922	XP_011533470.1	COG6	57511	PREDICTED: conserved oligomeric Golgi complex subunit 6 isoform X1	0.03	1.807	2	1	1	1	1	702	78.3	5.67	3.31	1
23957690	NP_705831.1	COG7	91949	conserved oligomeric Golgi complex subunit 7	0.004	4.286	2	1	1	1	1	770	86.3	5.47	2.2	1
4758024	NP_004636.1	COIL	8161	coilin	0	10.938	6	3	11	3	1	576	62.6	9.07	28.06	3
110349772	NP_000079.2	COL1A1	1277	collagen alpha-1(I) chain preproprotein	0.024	1.947	1	1	1	1	1	1464	138.8	5.8	2.05	1
767916566	XP_011508868.1	COL4A4	1286	PREDICTED: collagen alpha-4(IV) chain isoform X12	0.045	1.489	1	1	1	1	1	1420	135	9.19	2.28	1
31377697	NP_078932.2	COLGALT1	79709	procollagen galactosyltransferase 1 precursor	0	20.446	9	5	13	5	1	622	71.6	7.31	49.64	5
45545435	NP_057178.2	COMMD2	51122	COMM domain-containing protein 2	0.002	4.878	8	2	3	2	1	199	22.7	6.73	7.64	2
323276616	NP_001190991.1	COMMD3-BMI1	100532731	COMMD3-BMI1 read-through protein	0	21.496	10	4	42	3	1	469	53.3	7.93	123.02	4	Acetyl [N-Term]
45333909	NP_987093.1	COMMD6	170622	COMM domain-containing protein 6 isoform a	0.014	2.352	12	1	1	1	1	98	10.9	6	1.84	1	Acetyl [N-Term]
156416005	NP_054905.2	COMMD9	29099	COMM domain-containing protein 9 isoform 1	0.003	4.307	6	1	1	1	1	198	21.8	5.88	2.52	1
768023409	XP_011528188.1	COMT	1312	PREDICTED: catechol O-methyltransferase isoform X1	0	11.082	12	3	18	3	1	309	34.2	5.64	62.87	3
148536855	NP_001091868.1	COPA	1314	coatomer subunit alpha isoform 1	0	131.245	21	24	124	24	1	1233	139.2	7.59	429.57	24
221316632	NP_001137534.1	COPB1	1315	coatomer subunit beta	0	87.646	16	12	57	12	1	953	107.1	6.05	184.75	12
4758032	NP_004757.1	COPB2	9276	coatomer subunit beta'	0	97.044	27	20	114	20	1	906	102.4	5.27	392.5	20
768000711	XP_011525957.1	COPE	11316	PREDICTED: coatomer subunit epsilon isoform X1	0	16.583	12	3	13	3	1	331	36.9	5.16	34.94	3
11559929	NP_057212.1	COPG1	22820	coatomer subunit gamma-1	0	46.016	15	10	38	8	1	874	97.7	5.47	104.07	10
109134349	NP_036265.3	COPG2	26958	coatomer subunit gamma-2 isoform 1	0	47.481	15	10	57	8	1	871	97.6	5.81	177.58	10
219842262	NP_001137359.1	COPS2	9318	COP9 signalosome complex subunit 2 isoform 2	0	32.062	18	7	28	7	1	450	52.4	5.47	59.47	7
23238222	NP_003644.2	COPS3	8533	COP9 signalosome complex subunit 3 isoform 1	0	21.51	12	4	28	4	1	423	47.8	6.65	74.04	4
38373690	NP_057213.2	COPS4	51138	COP9 signalosome complex subunit 4 isoform 1	0	52.412	29	9	62	9	1	406	46.2	5.83	219.77	9
38027923	NP_006828.2	COPS5	10987	COP9 signalosome complex subunit 5	0	10.746	9	2	8	2	1	334	37.6	6.54	24.22	2
34147637	NP_006824.2	COPS6	10980	COP9 signalosome complex subunit 6	0	36.131	18	4	31	4	1	327	36.1	5.73	122.81	4
530398666	XP_005253751.1	COPS7A	50813	PREDICTED: COP9 signalosome complex subunit 7a isoform X1	0	20.506	24	4	9	4	1	275	30.3	8.22	47.92	4
1034615914	XP_016860205.1	COPS7B	64708	PREDICTED: COP9 signalosome complex subunit 7b isoform X2	0	25.082	24	5	13	5	1	264	29.6	6.15	68.63	5
5729779	NP_006701.1	COPS8	10920	COP9 signalosome complex subunit 8 isoform 1	0	24.424	29	4	54	4	1	209	23.2	5.38	189.9	4
1034578543	XP_016874486.1	COPZ1	22818	PREDICTED: coatomer subunit zeta-1 isoform X1	0	24.148	23	4	32	4	1	180	20.4	4.94	85.29	4	Acetyl [N-Term]
116063536	NP_115690.3	COQ5	84274	2-methoxy-6-polyprenyl-1,4-benzoquinol methylase, mitochondrial precursor	0	6.582	8	2	3	2	1	327	37.1	6.95	7.78	2
25453484	NP_057222.2	COQ7	10229	5-demethoxyubiquinone hydroxylase, mitochondrial isoform 1	0.006	3.408	5	1	1	1	1	217	24.3	8.59	0	1
767988216	XP_011544016.1	CORO1A	11151	PREDICTED: coronin-1A isoform X2	0	111.548	32	18	282	18	1	461	51	6.68	949.66	18
157412328	NP_001098707.1	CORO1C	23603	coronin-1C isoform a	0	77.288	25	13	88	13	1	527	58.9	7.75	289.17	13
319918873	NP_001188408.1	CORO7-PAM16	100529144	CORO7-PAM16 protein	0	37.043	12	10	22	10	1	1048	114.1	6.33	58.21	10
17921985	NP_510870.1	COX15	1355	cytochrome c oxidase assembly protein COX15 homolog isoform 1	0	6.824	6	2	5	2	1	410	46	9.82	15.04	2
663071141	NP_001284661.1	COX18	285521	mitochondrial inner membrane protein COX18 isoform 1	0.009	2.694	3	1	1	1	1	334	37.1	9.83	2.66	1
71979925	NP_001026788.1	COX19	90639	cytochrome c oxidase assembly protein COX19	0.004	4.287	14	1	1	1	1	90	10.4	8.72	2.92	1
251831110	YP_003024029.1	COX2	4513	cytochrome c oxidase subunit II (mitochondrion)	0	7.129	7	2	35	2	1	227	25.5	4.82	86.64	2
918410276	NP_001299801.1	COX20	116228	cytochrome c oxidase protein 20 homolog isoform 2	0.016	2.166	11	1	2	1	1	130	14.7	8.81	4.28	1
251831113	YP_003024032.1	COX3	4514	cytochrome c oxidase subunit III (mitochondrion)	0.048	1.433	5	1	1	1	1	261	29.9	7.31	0	1
4502981	NP_001852.1	COX4I1	1327	cytochrome c oxidase subunit 4 isoform 1, mitochondrial isoform 1 precursor	0	28.126	25	5	44	5	1	169	19.6	9.51	139.13	5
190885499	NP_004246.2	COX5A	9377	cytochrome c oxidase subunit 5A, mitochondrial precursor	0	24.368	22	4	28	4	1	150	16.8	6.79	100.59	4
17017988	NP_001853.2	COX5B	1329	cytochrome c oxidase subunit 5B, mitochondrial precursor	0	28.436	50	6	43	6	1	129	13.7	8.81	138.79	6
4502985	NP_001854.1	COX6B1	1340	cytochrome c oxidase subunit 6B1	0.003	4.521	14	1	3	1	1	86	10.2	7.05	10.32	1
1034659069	XP_016868509.1	COX6C	1345	PREDICTED: cytochrome c oxidase subunit 6C isoform X1	0	17.81	27	3	30	3	1	75	8.8	10.39	83.75	3
262118227	NP_001856.2	COX7A2	1347	cytochrome c oxidase subunit 7A2, mitochondrial precursor	0	9.485	20	2	10	2	1	115	12.8	9.13	32.37	2
18105037	NP_004709.2	COX7A2L	9167	cytochrome c oxidase subunit 7A-related protein, mitochondrial isoform a	0.002	5.02	11	1	1	1	1	114	12.6	9.42	3.13	1
22202611	NP_001295.2	CPD	1362	carboxypeptidase D isoform 1 precursor	0.004	4.189	1	1	1	1	1	1380	152.8	6.05	2.58	1
197333761	NP_003906.2	CPNE1	8904	copine-1 isoform b	0	25.739	10	5	22	5	1	542	59.7	6.04	82.27	5
1034661896	XP_016869434.1	CPNE3	8895	PREDICTED: copine-3 isoform X1	0	37.494	20	9	25	9	1	537	60.1	5.85	75.42	9
41393599	NP_000088.3	CPOX	1371	oxygen-dependent coproporphyrinogen-III oxidase, mitochondrial precursor	0	33.972	19	6	29	6	1	454	50.1	8.25	107.85	6
153251270	NP_060810.2	CPPED1	55313	serine/threonine-protein phosphatase CPPED1 isoform a	0	6.245	6	1	5	1	1	314	35.5	6.2	18.09	1
56676371	NP_037423.2	CPSF1	29894	cleavage and polyadenylation specificity factor subunit 1	0	71.343	10	12	51	12	1	1443	160.8	6.4	197.22	12
34101288	NP_059133.1	CPSF2	53981	cleavage and polyadenylation specificity factor subunit 2 isoform 1	0	30.78	10	8	19	8	1	782	88.4	5.11	67.44	8
1012443553	NP_001308765.1	CPSF3	51692	cleavage and polyadenylation specificity factor subunit 3 isoform d	0	31.811	14	7	19	7	1	688	78	5.9	69.83	7
33300633	NP_060341.2	CPSF3L	54973	integrator complex subunit 11 isoform 2	0.004	4.218	2	1	1	1	1	600	67.6	8.06	2.63	1
767946724	XP_011514057.1	CPSF4	10898	PREDICTED: cleavage and polyadenylation specificity factor subunit 4 isoform X1	0	17.676	16	3	20	3	1	274	30.7	8.29	68.59	3
530399640	XP_005268645.1	CPSF6	11052	PREDICTED: cleavage and polyadenylation specificity factor subunit 6 isoform X1	0	65.587	19	11	79	11	1	589	63.6	7.97	272.1	11
217035102	NP_079087.3	CPSF7	79869	cleavage and polyadenylation specificity factor subunit 7 isoform 1	0	47.046	22	9	56	9	1	514	56.3	8.87	215.93	9
530396298	XP_005273819.1	CPT1A	1374	PREDICTED: carnitine O-palmitoyltransferase 1, liver isoform isoform X1	0	14.336	5	3	10	3	1	805	91.8	8.5	29.49	3
4503023	NP_000089.1	CPT2	1376	carnitine O-palmitoyltransferase 2, mitochondrial precursor	0	17.508	8	4	12	4	1	658	73.7	8.18	35.98	4
767945597	XP_011513739.1	CPVL	54504	PREDICTED: probable serine carboxypeptidase CPVL isoform X1	0	25.504	16	7	26	7	1	476	54.1	5.62	62.01	7
4758052	NP_004369.1	CRABP1	1381	cellular retinoic acid-binding protein 1	0	32.662	53	8	44	8	1	137	15.6	5.38	148.71	8
7656977	NP_055293.1	CRCP	27297	DNA-directed RNA polymerase III subunit RPC9 isoform a	0	10.36	11	1	5	1	1	148	16.9	5.39	21.49	1
767916783	XP_011508947.1	CREB1	1385	PREDICTED: cyclic AMP-responsive element-binding protein 1 isoform X1	0	14.413	16	3	8	2	1	341	36.7	5.57	34.22	3
18702325	NP_570968.1	CREB3L4	148327	cyclic AMP-responsive element-binding protein 3-like protein 4 isoform 1	0.083	1.093	11	1	1	1	1	395	43.4	5.43	0	1
119943104	NP_004371.2	CREBBP	1387	CREB-binding protein isoform a	0	30.07	3	6	14	3	1	2442	265.2	8.53	54.57	6
530420366	XP_005261794.1	CRELD2	79174	PREDICTED: cysteine-rich with EGF-like domain protein 2 isoform X1	0	7.077	6	2	2	2	1	403	43.6	4.79	5.14	2
41327712	NP_058431.2	CRK	1398	adapter molecule crk isoform a	0	10.526	9	2	6	2	1	304	33.8	5.55	19.75	2
4885153	NP_005198.1	CRKL	1399	crk-like protein	0	29.321	26	5	78	5	1	303	33.8	6.74	213.27	5
156142186	NP_057070.3	CRLF3	51379	cytokine receptor-like factor 3	0	30.776	16	5	18	5	1	442	49.7	5.14	62.8	5
124256489	NP_057736.4	CRNKL1	51340	crooked neck-like protein 1 isoform a	0	60.67	15	12	42	12	1	848	100.4	8	137.17	12
5453601	NP_006362.1	CRTAP	10491	cartilage-associated protein precursor	0	5.757	4	1	3	1	1	401	46.5	5.73	12.58	1
530364273	XP_005245003.1	CRTC2	200186	PREDICTED: CREB-regulated transcription coactivator 2 isoform X1	0	8.759	6	2	7	2	1	698	73.9	7.11	19.3	2
110431354	NP_073606.3	CRTC3	64784	CREB-regulated transcription coactivator 3 isoform a	0.009	2.635	3	1	1	1	1	619	66.9	6.84	3.69	1
767902514	XP_011539049.1	CRYZ	1429	PREDICTED: quinone oxidoreductase isoform X1	0	36.85	22	6	24	6	1	329	35.2	8.44	89.43	6
90669511	NP_665857.2	CRYZL1	9946	quinone oxidoreductase-like protein 1	0	13.808	7	2	5	2	1	349	38.7	5.78	22.86	2
38327625	NP_004068.2	CS	1431	citrate synthase, mitochondrial precursor	0	37.517	17	8	80	8	1	466	51.7	8.32	221.59	8
338968930	NP_001229820.1	CSDE1	7812	cold shock domain-containing protein E1 isoform 4	0	102.943	22	18	93	18	1	844	93.7	6.52	327.54	18
29029559	NP_001307.2	CSE1L	1434	exportin-2 isoform 1	0	116.928	18	20	173	20	1	971	110.3	5.77	566.87	20
530405396	XP_005254222.1	CSK	1445	PREDICTED: tyrosine-protein kinase CSK isoform X1	0	53.757	29	12	50	12	1	450	50.7	7.06	123.33	12
68303575	NP_001020276.1	CSNK1A1	1452	casein kinase I isoform alpha isoform 1	0	15.718	15	5	18	5	1	365	41.9	9.6	37.32	5
20544145	NP_620693.1	CSNK1D	1453	casein kinase I isoform delta isoform 2	0	9.854	10	3	3	3	1	409	46.8	9.64	7.67	3
4503095	NP_001886.1	CSNK2A1	1457	casein kinase II subunit alpha isoform a	0	53.532	26	9	51	8	1	391	45.1	7.74	154.26	9
4503097	NP_001887.1	CSNK2A2	1459	casein kinase II subunit alpha'	0	38.224	26	7	43	6	1	350	41.2	8.56	127.48	7
23503295	NP_001311.3	CSNK2B	1460	casein kinase II subunit beta isoform 1	0.002	4.666	5	1	12	1	1	215	24.9	5.55	37.51	1
47419930	NP_001888.2	CSPG4	1464	chondroitin sulfate proteoglycan 4 precursor	0.026	1.884	1	1	1	1	1	2322	250.4	5.47	3.09	1
4758086	NP_004069.1	CSRP1	1465	cysteine and glycine-rich protein 1 isoform 1	0	41.74	47	6	33	6	1	193	20.6	8.57	131.61	6
4503117	NP_000091.1	CSTB	1476	cystatin-B	0	17.528	37	2	16	2	1	98	11.1	7.56	70.65	2	Acetyl [N-Term]
4557491	NP_001315.1	CSTF1	1477	cleavage stimulation factor subunit 1	0	30.509	19	6	23	6	1	431	48.3	6.58	75.29	6
4557493	NP_001316.1	CSTF2	1478	cleavage stimulation factor subunit 2 isoform 2	0	45.751	22	10	76	6	1	577	60.9	6.83	227.88	10
14149675	NP_056050.1	CSTF2T	23283	cleavage stimulation factor subunit 2 tau variant	0	33.847	18	8	53	4	1	616	64.4	7.25	142.8	8
4557495	NP_001317.1	CSTF3	1479	cleavage stimulation factor subunit 3 isoform 1	0	22.902	12	7	13	7	1	717	82.9	8.12	36.61	7
1034587116	XP_016876803.1	CTAGE5	4253	PREDICTED: cTAGE family member 5 isoform X1	0	15.357	7	4	6	4	1	818	92.5	5.16	21.4	4
530427319	XP_005272318.1	CTBP1	1487	PREDICTED: C-terminal-binding protein 1 isoform X1	0	17.993	15	5	18	5	1	441	47.6	6.77	59.16	5
5729790	NP_006556.1	CTCF	10664	transcriptional repressor CTCF isoform 1	0	25.198	8	5	18	5	1	727	82.7	6.96	52.65	5
67188445	NP_004706.3	CTDP1	9150	RNA polymerase II subunit A C-terminal domain phosphatase isoform 1	0	55.96	14	11	27	11	1	961	104.3	5.27	87.25	11	Acetyl [N-Term]
530405971	XP_005254498.1	CTDSPL2	51496	PREDICTED: CTD small phosphatase-like protein 2 isoform X1	0	32.008	19	7	25	7	1	466	53	6.4	66.78	7
18644734	NP_110517.2	CTNNBL1	56259	beta-catenin-like protein 1 isoform 1	0	43.668	11	7	49	7	1	563	65.1	5.05	139.76	7	Acetyl [N-Term]
148491070	NP_001896.2	CTPS1	1503	CTP synthase 1 isoform a	0	73.857	26	16	84	16	1	591	66.6	6.46	291.11	16
7661950	NP_055448.1	CTR9	9646	RNA polymerase-associated protein CTR9 homolog	0	26.667	7	6	10	6	1	1173	133.4	6.77	25.92	6
22538431	NP_680090.1	CTSB	1508	cathepsin B isoform 1 preproprotein	0.002	5.121	5	1	1	1	1	339	37.8	6.3	3.97	1
189083844	NP_001805.3	CTSC	1075	dipeptidyl peptidase 1 isoform a preproprotein	0	11.298	7	2	6	2	1	463	51.8	6.99	17.12	2
sp	NP_001900.1	CTSD	1509	cathepsin D preproprotein	0	24.104	12	4	43	4	1	412	44.5	6.54	129.45	4
23110962	NP_004070.3	CTSS	1520	cathepsin S isoform 1 preproprotein	0.003	4.629	4	1	4	1	1	331	37.5	8.34	11.01	1
296080746	NP_001171669.1	CTTN	2017	src substrate cortactin isoform c	0	7.589	4	2	4	2	1	634	70.9	6.64	10.16	2
222537719	NP_660275.2	CTU1	90353	cytoplasmic tRNA 2-thiolation protein 1	0.003	4.327	4	1	1	1	1	348	36.4	9.2	3.2	1
972781663	NP_001305436.1	CTU2	348180	cytoplasmic tRNA 2-thiolation protein 2 isoform 3	0	5.261	2	1	3	1	1	586	63.6	7.01	9.83	1
32307161	NP_003583.2	CUL1	8454	cullin-1	0	56.925	12	9	56	9	1	776	89.6	8	198.9	9
767960690	XP_011518045.1	CUL2	8453	PREDICTED: cullin-2 isoform X1	0	25.412	7	6	19	6	1	808	94.2	7.14	46.76	6
380714665	NP_001244127.1	CUL3	8452	cullin-3 isoform 3	0	27.5	10	7	26	7	1	774	89.7	7.97	93.05	7
57165424	NP_001008895.1	CUL4A	8451	cullin-4A isoform 1	0	23.826	8	6	21	4	1	759	87.6	8.13	61.06	6
121114302	NP_001073341.1	CUL4B	8450	cullin-4B isoform 2	0	34.079	11	8	17	6	1	895	102.2	7.94	55.83	8	Acetyl [N-Term]
40254446	NP_003469.2	CUL5	8065	cullin-5	0	21.949	8	6	15	6	1	780	90.9	7.94	42.69	6
62198241	NP_001014433.1	CUTA	51596	protein CutA isoform 1	0	9.182	7	1	28	1	1	198	20.9	5.48	86.19	1
148596990	NP_057044.2	CUTC	51076	copper homeostasis protein cutC homolog	0	16.636	10	2	17	2	1	273	29.3	8.18	62.25	2
530385497	XP_005250207.1	CUX1	1523	PREDICTED: protein CASP isoform X1	0	8.332	2	2	4	2	1	1604	174.5	6.33	7.29	2
116812573	NP_057487.2	CWC15	51503	spliceosome-associated protein CWC15 homolog	0	11.567	14	3	18	3	1	229	26.6	5.71	64.48	3
530370697	XP_005246783.1	CWC22	57703	PREDICTED: pre-mRNA-splicing factor CWC22 homolog isoform X1	0	10.122	1	1	6	1	1	908	105.4	7.03	21.81	1
8923271	NP_060218.1	CWC25	54883	pre-mRNA-splicing factor CWC25 homolog	0.026	1.89	2	1	1	1	1	425	49.6	10.18	2.2	1
64276486	NP_005860.2	CWC27	10283	peptidyl-prolyl cis-trans isomerase CWC27 homolog isoform 1	0	28.129	12	5	18	5	1	472	53.8	5.8	66.06	5
93352551	NP_060764.3	CWF19L1	55280	CWF19-like protein 1 isoform 1	0	32.993	14	7	32	7	1	538	60.6	7.24	104.36	7
169234949	NP_689647.2	CWF19L2	143884	CWF19-like protein 2	0.002	4.727	2	1	2	1	1	894	103.7	8.65	10.34	1
56790927	NP_001008540.1	CXCR4	7852	C-X-C chemokine receptor type 4 isoform a	0	13.88	8	2	9	2	1	356	40.2	8.34	16.51	2
11545813	NP_071384.1	CXorf56	63932	UPF0428 protein CXorf56 isoform 1	0.004	3.67	5	1	1	1	1	222	25.6	8.73	2.2	1
767998613	XP_011524242.1	CXXC1	30827	PREDICTED: CXXC-type zinc finger protein 1 isoform X1	0	10.351	4	2	5	2	1	660	76.2	8.24	18.83	2
284448551	NP_001165131.1	CYB5R3	1727	NADH-cytochrome b5 reductase 3 isoform 3	0	25.287	14	4	32	4	1	334	38.2	6.9	150.8	4
1034659293	XP_016868591.1	CYC1	1537	PREDICTED: cytochrome c1, heme protein, mitochondrial isoform X1	0	17.614	13	4	18	4	1	357	38	6.14	54.35	4
11128019	NP_061820.1	CYCS	54205	cytochrome c	0	11.273	28	3	25	3	1	105	11.7	9.57	60.55	3
1022943302	NP_001311048.1	CYFIP1	23191	cytoplasmic FMR1-interacting protein 1 1287 isoform c	0	38.244	9	11	39	3	1	1287	148.6	7.01	102.01	11
82617634	NP_001032410.1	CYFIP2	26999	cytoplasmic FMR1-interacting protein 2 isoform a	0	63.902	13	14	66	6	1	1253	145.6	7.05	193.38	14
29171730	NP_803882.1	CYP20A1	57404	cytochrome P450 20A1	0	24.017	8	3	13	3	1	462	52.4	6.21	37.51	3
4503253	NP_001335.1	DAD1	1603	dolichyl-diphosphooligosaccharide--protein glycosyltransferase subunit DAD1	0.002	5.152	11	1	11	1	1	113	12.5	7.08	37.1	1
218931251	NP_631918.3	DAGLB	221955	sn1-specific diacylglycerol lipase beta isoform 1	0	7.433	4	2	2	2	1	672	73.7	6.55	3.72	2
315434212	NP_001186778.1	DAP3	7818	28S ribosomal protein S29, mitochondrial isoform 1	0.002	4.685	6	2	5	2	1	398	45.5	8.88	9.93	2
570359579	NP_001275660.1	DAPK1	1612	death-associated protein kinase 1	0.004	3.608	1	2	2	2	1	1430	159.9	6.83	3.66	2
530425141	XP_005259565.1	DAPK3	1613	PREDICTED: death-associated protein kinase 3 isoform X1	0.016	2.157	3	1	1	1	1	454	52.5	6.89	3.03	1
45439306	NP_001340.2	DARS	1615	aspartate--tRNA ligase, cytoplasmic isoform 1	0	114.07	42	20	145	20	1	501	57.1	6.55	485.99	20
40789249	NP_060592.2	DARS2	55157	aspartate--tRNA ligase, mitochondrial	0	7.18	3	2	7	2	1	645	73.5	8.02	14.69	2
215422366	NP_001135442.1	DAXX	1616	death domain-associated protein 6 isoform b	0	20.996	9	4	18	4	1	752	82.8	4.89	54.2	4
25470886	NP_061832.2	DAZAP1	26528	DAZ-associated protein 1 isoform b	0	29.207	17	5	57	5	1	407	43.4	8.56	178.4	5	Acetyl [N-Term]
5729734	NP_006707.1	DBF4	10926	protein DBF4 homolog A isoform 1	0.049	1.42	2	1	2	1	1	674	76.8	7.9	6.79	1
295849266	NP_001171488.1	DBI	1622	acyl-CoA-binding protein isoform 4	0	23.414	31	3	22	3	1	148	16.5	9.38	85.43	3
767938112	XP_011532748.1	DBN1	1627	PREDICTED: drebrin isoform X1	0	131.639	34	23	127	23	1	697	76.4	4.58	522.59	23
171906575	NP_001116428.1	DBNL	28988	drebrin-like protein isoform c	0	75.684	31	11	99	1	1	439	49	5.05	362	11
767945335	XP_011513627.1	DBNL	28988	PREDICTED: drebrin-like protein isoform X1	0	75.383	30	11	109	1	1	438	48.9	5.05	389.49	11
56549113	NP_057300.2	DBR1	51163	lariat debranching enzyme	0	30.342	14	6	43	6	1	544	61.5	5.47	137.33	6
392494079	NP_001909.3	DBT	1629	lipoamide acyltransferase component of branched-chain alpha-keto acid dehydrogenase complex, mitochondrial precursor	0	5.397	4	1	3	1	1	482	53.5	8.51	10.37	1
254553334	NP_001156956.1	DCAF11	80344	DDB1- and CUL4-associated factor 11 isoform 1	0	15.102	9	3	11	3	1	546	61.6	6.4	31.98	3
22218619	NP_056212.1	DCAF12	25853	DDB1- and CUL4-associated factor 12	0.002	4.718	2	1	2	1	1	453	50.5	9.1	4.53	1
229892270	NP_056235.4	DCAF13	25879	DDB1- and CUL4-associated factor 13	0	21.913	9	4	17	4	1	597	67.5	9.29	63.78	4
1034640285	XP_016863817.1	DCAF16	54876	PREDICTED: DDB1- and CUL4-associated factor 16 isoform X1	0	12.547	21	4	7	4	1	216	24.2	6.04	14.92	4
578826238	XP_006720360.1	DCAF5	8816	PREDICTED: DDB1- and CUL4-associated factor 5 isoform X1	0.013	2.405	3	1	1	1	1	977	108	6.04	2.57	1
108936958	NP_005819.3	DCAF7	10238	DDB1- and CUL4-associated factor 7	0	17.501	13	4	23	4	1	342	38.9	5.52	61.87	4
30089954	NP_056541.2	DCAF8	50717	DDB1- and CUL4-associated factor 8	0	9.816	4	2	3	2	1	597	66.8	5.39	10.36	2
568815620	NP_001275584.1	DCAKD	79877	dephospho-CoA kinase domain-containing protein	0.004	3.647	5	1	2	1	1	231	26.5	9.58	4.8	1
665505971	NP_001287783.1	DCD	117159	dermcidin isoform 2 preproprotein	0.002	4.781	9	1	1	1	1	121	12.4	7.97	3.01	1
4503269	NP_000779.1	DCK	1633	deoxycytidine kinase	0	40.391	37	7	96	7	1	260	30.5	5.21	293.3	7
291327466	NP_060873.4	DCP1A	55802	mRNA-decapping enzyme 1A isoform a	0	34.596	16	7	22	7	1	582	63.2	6.25	51.55	7
31542498	NP_689837.2	DCP2	167227	m7GpppN-mRNA hydrolase isoform 1	0.006	3.474	4	2	6	2	1	420	48.4	8	5.4	2
767970038	XP_011541080.1	DCPS	28960	PREDICTED: m7GpppX diphosphatase isoform X1	0	8.897	6	2	6	2	1	344	39.2	6.28	13.2	2
13259510	NP_004073.2	DCTN1	1639	dynactin subunit 1 isoform 1	0	152.075	25	26	131	26	1	1278	141.6	5.81	472.14	26
5453629	NP_006391.1	DCTN2	10540	dynactin subunit 2 isoform 1	0	59.785	35	12	57	12	1	406	44.8	5.17	178.15	12
208431793	NP_001129115.1	DCTN4	51164	dynactin subunit 4 isoform a	0	48.08	23	7	28	7	1	467	53.1	7.39	103.53	7
14210488	NP_115875.1	DCTN5	84516	dynactin subunit 5 isoform 1	0.004	4.042	5	1	5	1	1	182	20.1	8.02	12.58	1	Acetyl [N-Term]
13129100	NP_077001.1	DCTPP1	79077	dCTP pyrophosphatase 1	0	49.9	57	10	81	10	1	170	18.7	5.03	316.47	10
767926957	XP_011511214.1	DCUN1D1	54165	PREDICTED: DCN1-like protein 1 isoform X2	0	9.652	8	2	9	2	1	280	32.8	7.74	30.25	2
14150015	NP_115675.1	DCUN1D5	84259	DCN1-like protein 5 isoform a	0.002	5.005	5	1	4	1	1	237	27.5	5.58	15.64	1
7705925	NP_057370.1	DCXR	51181	L-xylulose reductase isoform 1	0	23.589	20	5	29	5	1	244	25.9	8.1	72.61	5	Acetyl [N-Term]
13129016	NP_076955.1	DDA1	79016	DET1- and DDB1-associated protein 1	0	10.672	27	2	10	2	1	102	11.8	8.68	35.75	2
148529014	NP_001914.3	DDB1	1642	DNA damage-binding protein 1	0	98.394	20	20	96	20	1	1140	126.9	5.26	311.58	20
4557515	NP_000098.1	DDB2	1643	DNA damage-binding protein 2 isoform WT	0	15.9	7	2	7	2	1	427	47.8	9.47	36.26	2
237757346	NP_001153620.1	DDHD1	80821	phospholipase DDHD1 isoform c	0.068	1.239	1	1	1	1	1	900	100.4	5.67	3.46	1
1034659743	XP_016868741.1	DDHD2	23259	PREDICTED: phospholipase DDHD2 isoform X1	0.009	2.672	2	1	1	1	1	711	81	5.39	2.94	1
62955833	NP_115717.3	DDI2	84301	protein DDI1 homolog 2	0	20.423	17	4	25	4	1	399	44.5	5.05	82.37	4
20070197	NP_005207.2	DDOST	1650	dolichyl-diphosphooligosaccharide--protein glycosyltransferase 48 kDa subunit precursor	0	16.209	11	5	33	5	1	456	50.7	6.4	77.87	5
13027602	NP_076424.1	DDRGK1	65992	DDRGK domain-containing protein 1	0	16.272	10	2	12	2	1	314	35.6	5.12	50.28	2
4503291	NP_001346.1	DDT	1652	D-dopachrome decarboxylase	0	7.411	16	2	9	2	1	118	12.7	7.3	19.91	2
4826686	NP_004930.1	DDX1	1653	ATP-dependent RNA helicase DDX1	0	95.306	20	14	97	14	1	740	82.4	7.23	365.62	14
13514831	NP_004389.2	DDX10	1662	probable ATP-dependent RNA helicase DDX10	0	7.509	3	2	3	2	1	875	100.8	8.63	11.14	2
148613856	NP_001091974.1	DDX17	10521	probable ATP-dependent RNA helicase DDX17 isoform 3	0	175.349	43	30	350	22	1	731	80.4	8.37	1092.32	30
38327634	NP_006764.3	DDX18	8886	ATP-dependent RNA helicase DDX18	0	44.684	9	6	36	6	1	670	75.4	9.5	114.72	6
8922886	NP_060802.1	DDX19A	55308	ATP-dependent RNA helicase DDX19A isoform 1	0	63.689	27	12	61	2	1	478	53.9	6.58	219.52	12
767989318	XP_011521134.1	DDX19B	11269	PREDICTED: ATP-dependent RNA helicase DDX19B isoform X1	0	52.901	22	11	54	1	1	539	59.9	6.67	181.32	11
256223453	NP_009135.4	DDX20	11218	probable ATP-dependent RNA helicase DDX20	0	29.07	11	7	17	7	1	824	92.2	6.95	66.26	7
50659095	NP_004719.2	DDX21	9188	nucleolar RNA helicase 2 isoform 1	0	164.033	34	26	218	25	1	783	87.3	9.28	821.57	26
41327771	NP_004809.2	DDX23	9416	probable ATP-dependent RNA helicase DDX23	0	62.697	20	15	60	15	1	820	95.5	9.55	194.34	15
9966805	NP_065147.1	DDX24	57062	ATP-dependent RNA helicase DDX24	0	48.674	20	10	54	10	1	859	96.3	9.06	174.2	10
768017496	XP_011527190.1	DDX27	55661	PREDICTED: probable ATP-dependent RNA helicase DDX27 isoform X1	0	26.99	8	6	27	6	1	827	93.2	9.22	76.4	6
256773275	NP_060850.2	DDX28	55794	probable ATP-dependent RNA helicase DDX28	0	7.914	5	2	3	2	1	540	59.5	10.42	8.18	2
21040371	NP_005795.2	DDX39A	10212	ATP-dependent RNA helicase DDX39A	0	75.604	35	16	152	6	1	427	49.1	5.68	424.62	16
18375623	NP_542165.1	DDX39B	7919	spliceosome RNA helicase DDX39B	0	67.894	29	14	142	4	1	428	49	5.67	404.28	14
87196351	NP_001347.3	DDX3X	1654	ATP-dependent RNA helicase DDX3X isoform 1	0	126.524	35	24	150	23	1	662	73.2	7.18	436.87	24
21071032	NP_057306.2	DDX41	51428	probable ATP-dependent RNA helicase DDX41 isoform 1	0	29.014	10	5	22	5	1	622	69.8	6.84	72.7	5	Acetyl [N-Term]
1034597977	XP_016879600.1	DDX42	11325	PREDICTED: ATP-dependent RNA helicase DDX42 isoform X1	0	79.015	21	17	108	17	1	938	102.9	7.02	314.78	17
664806097	NP_001287789.1	DDX46	9879	probable ATP-dependent RNA helicase DDX46 isoform 1	0	87.167	21	18	74	18	1	1032	117.4	9.29	258.88	18
20149629	NP_057439.2	DDX47	51202	probable ATP-dependent RNA helicase DDX47 isoform 1	0	33.133	19	7	25	7	1	455	50.6	9.1	88.34	7
1002095800	NP_001307526.1	DDX5	1655	probable ATP-dependent RNA helicase DDX5 isoform b	0	164.152	39	29	337	21	1	614	69	8.85	1099.85	29
13129006	NP_076950.1	DDX50	79009	ATP-dependent RNA helicase DDX50	0	51.475	19	12	60	11	1	737	82.5	9.17	200.83	12
154759257	NP_778236.2	DDX51	317781	ATP-dependent RNA helicase DDX51	0	21.423	11	5	11	5	1	666	72.4	8.16	36.8	5
612407837	NP_008941.3	DDX52	11056	probable ATP-dependent RNA helicase DDX52 isoform 1	0	20.403	7	4	10	4	1	599	67.4	9.67	24.7	4	Acetyl [N-Term]
164419743	NP_001104792.1	DDX54	79039	ATP-dependent RNA helicase DDX54 isoform 1	0	19.659	7	5	14	5	1	882	98.6	10.02	37.25	5
1034580821	XP_016875199.1	DDX55	57696	PREDICTED: ATP-dependent RNA helicase DDX55 isoform X1	0	6.973	4	2	2	2	1	618	70.5	9.29	4.74	2
9506931	NP_061955.1	DDX56	54606	probable ATP-dependent RNA helicase DDX56 isoform 1	0	41.076	17	8	29	8	1	547	61.6	9.26	84.88	8	Acetyl [N-Term]
380692342	NP_001244120.1	DDX6	1656	probable ATP-dependent RNA helicase DDX6	0	80.131	26	11	97	11	1	483	54.4	8.66	362.81	11
4503301	NP_001350.1	DECR1	1666	2,4-dienoyl-CoA reductase, mitochondrial precursor	0	33.165	24	6	42	6	1	335	36	9.28	152.21	6
145312241	NP_071330.3	DEF6	50619	differentially expressed in FDCP 6 homolog	0	34.047	12	7	27	7	1	631	73.9	6.05	92.86	7
1034651579	XP_016866762.1	DEK	7913	PREDICTED: protein DEK isoform X1	0	58.232	19	9	98	9	1	380	43.2	8.56	342.35	9
578816579	XP_006716867.1	DENND4C	55667	PREDICTED: DENN domain-containing protein 4C isoform X1	0	6.759	2	2	2	2	1	1958	217.7	6.64	6.43	2
32698777	NP_689891.1	DENND6A	201627	protein DENND6A	0.008	3.131	2	1	1	1	1	608	69.5	8.27	3.74	1
27501446	NP_003668.2	DENR	8562	density-regulated protein	0	26.436	33	7	23	7	1	198	22.1	5.3	85.48	7
116063554	NP_057038.2	DERA	51071	deoxyribose-phosphate aldolase isoform 1	0	15.06	14	3	13	3	1	318	35.2	8.94	50.7	3
13236516	NP_077271.1	DERL1	79139	derlin-1 isoform a	0.003	4.627	4	1	5	1	1	251	28.8	9.51	6.11	1
530420015	XP_005261628.1	DESI1	27351	PREDICTED: desumoylating isopeptidase 1 isoform X1	0.009	2.899	4	1	2	1	1	209	23	6.71	4	1
4758148	NP_004392.1	DFFA	1676	DNA fragmentation factor subunit alpha isoform 1	0	58.353	34	9	47	9	1	331	36.5	4.79	175.9	9	Acetyl [N-Term]
544063489	NP_001269598.1	DFFB	1677	DNA fragmentation factor subunit beta isoform 1	0.019	2.035	2	1	1	1	1	362	41.9	8.78	2.55	1
145864459	NP_036211.2	DGAT1	8694	diacylglycerol O-acyltransferase 1	0.004	3.672	4	1	1	1	1	488	55.2	9.32	4.6	1
38488720	NP_073557.3	DGCR8	54487	microprocessor complex subunit DGCR8 isoform 1	0	9.409	4	2	7	2	1	773	86	5.95	27.88	2	Acetyl [N-Term]
1034578275	XP_016874389.1	DGKA	1606	PREDICTED: diacylglycerol kinase alpha isoform X1	0	30.437	11	8	26	8	1	891	100.7	7.9	60.5	8
1034575956	XP_016873944.1	DGKZ	8525	PREDICTED: diacylglycerol kinase zeta isoform X1	0	18.861	5	4	10	4	1	1176	130.4	9.06	38.92	4
13375618	NP_055577.1	DHCR24	1718	delta(24)-sterol reductase precursor	0.012	2.54	2	1	2	1	1	516	60.1	8.16	4.77	1
255308875	NP_001157289.1	DHCR7	1717	7-dehydrocholesterol reductase	0	9.393	5	2	15	2	1	475	54.5	8.7	52.1	2
4503323	NP_000782.1	DHFR	1719	dihydrofolate reductase isoform 1	0	30.14	29	6	34	6	1	187	21.4	7.42	95.64	6
4503325	NP_001921.1	DHPS	1725	deoxyhypusine synthase isoform a	0	65.798	27	9	57	9	1	369	40.9	5.36	209.31	9	Acetyl [N-Term]
146231950	NP_653284.2	DHRS13	147015	dehydrogenase/reductase SDR family member 13 precursor	0.003	4.485	3	1	1	1	1	377	40.8	7.69	3.51	1
32483357	NP_066284.2	DHRS4	10901	dehydrogenase/reductase SDR family member 4 isoform 1	0.004	4.177	4	1	3	1	1	278	29.5	8.56	9.56	1
1034599042	XP_016879914.1	DHRS7B	25979	PREDICTED: dehydrogenase/reductase SDR family member 7B isoform X2	0.05	1.389	2	1	2	1	1	372	39.9	8.97	3.9	1
193804850	NP_660160.2	DHRSX	207063	dehydrogenase/reductase SDR family member on chromosome X precursor	0.016	2.149	3	1	1	1	1	330	36.4	9	1.79	1
38788380	NP_061176.3	DHTKD1	55526	probable 2-oxoglutarate dehydrogenase E1 component DHKTD1, mitochondrial	0.005	3.545	1	1	1	1	1	919	103	6.93	2.37	1
68509926	NP_001349.2	DHX15	1665	pre-mRNA-splicing factor ATP-dependent RNA helicase DHX15	0	158.633	28	23	303	22	1	795	90.9	7.46	1029.66	23
255982614	NP_003578.2	DHX16	8449	putative pre-mRNA-splicing factor ATP-dependent RNA helicase DHX16 isoform 1	0	67.519	15	13	49	12	1	1041	119.2	6.8	150.56	13
67782362	NP_061903.2	DHX29	54505	ATP-dependent RNA helicase DHX29	0	11.825	3	3	7	3	1	1369	155.1	8.09	19.86	3
20336294	NP_619520.1	DHX30	22907	putative ATP-dependent RNA helicase DHX30 isoform 1	0	69.729	15	16	56	16	1	1194	133.9	8.78	140.28	16	Acetyl [N-Term]
20336302	NP_064547.2	DHX33	56919	putative ATP-dependent RNA helicase DHX33 isoform 1	0	10.001	4	2	3	2	1	707	78.8	8.91	13.47	2
20544129	NP_068750.2	DHX35	60625	probable ATP-dependent RNA helicase DHX35 isoform 1	0	8.48	5	3	6	3	1	703	78.9	8.59	14.08	3
167830433	NP_065916.2	DHX36	170506	ATP-dependent RNA helicase DHX36 isoform 1	0	30.778	13	8	18	8	1	1008	114.7	7.68	59.29	8
530401704	XP_005253647.1	DHX37	57647	PREDICTED: probable ATP-dependent RNA helicase DHX37 isoform X1	0	27.368	6	6	16	6	1	1175	130.7	8.13	55.33	6
767990941	XP_011521786.1	DHX38	9785	PREDICTED: pre-mRNA-splicing factor ATP-dependent RNA helicase PRP16 isoform X1	0	31.965	8	7	21	7	1	1227	140.4	6.54	69.41	7
261878478	NP_078888.4	DHX40	79665	probable ATP-dependent RNA helicase DHX40 isoform 1	0.008	3.171	1	1	3	1	1	779	88.5	8.65	6.76	1
4826690	NP_004932.1	DHX8	1659	ATP-dependent RNA helicase DHX8 isoform 1	0	32.003	7	8	25	7	1	1220	139.2	8.32	60.05	8
100913206	NP_001348.2	DHX9	1660	ATP-dependent RNA helicase A	0	190.191	27	32	317	32	1	1270	140.9	6.84	1069.65	32
9845297	NP_063940.1	DIABLO	56616	diablo homolog, mitochondrial isoform 1 precursor	0	44.754	31	8	47	8	1	239	27.1	5.9	168.97	8
119395758	NP_005210.3	DIAPH1	1729	protein diaphanous homolog 1 isoform 1	0	32.088	7	8	19	8	1	1272	141.3	5.41	54.51	8	Acetyl [N-Term]
29294649	NP_085124.2	DICER1	23405	endoribonuclease Dicer isoform 1	0	21.349	3	5	11	5	1	1922	218.5	5.68	31.69	5
301129170	NP_001180298.1	DIDO1	11083	death-inducer obliterator 1 isoform c	0	46.134	7	10	24	10	1	2240	243.7	7.88	79.39	10	Acetyl [N-Term]
75677335	NP_055203.4	DIEXF	27042	digestive organ expansion factor homolog	0.006	3.271	1	1	2	1	1	756	87	5.88	5.61	1
7657198	NP_055288.1	DIMT1	27292	probable dimethyladenosine transferase	0	5.77	6	2	9	2	1	313	35.2	9.99	22.25	2
767974923	XP_011536896.1	DIP2B	57609	PREDICTED: disco-interacting protein 2 homolog B isoform X1	0	30.362	6	7	14	7	1	1587	172.7	8.05	42.43	7
190014623	NP_055768.3	DIS3	22894	exosome complex exonuclease RRP44 isoform a	0	75.75	24	17	64	17	1	958	108.9	7.14	205.31	17
219521928	NP_001137160.1	DIS3L	115752	DIS3-like exonuclease 1 isoform 1	0	10.414	4	2	3	2	1	1054	120.7	6.54	13.05	2
134288890	NP_689596.4	DIS3L2	129563	DIS3-like exonuclease 2 isoform 1	0	6.47	2	1	3	1	1	885	99.2	6.1	12.11	1
4503337	NP_001354.1	DKC1	1736	H/ACA ribonucleoprotein complex subunit 4 isoform 1	0	65.17	23	14	90	14	1	514	57.6	9.42	261.97	14
31711992	NP_001922.2	DLAT	1737	dihydrolipoyllysine-residue acetyltransferase component of pyruvate dehydrogenase complex, mitochondrial precursor	0	24.188	11	7	37	7	1	647	69	7.84	83.26	7
91199540	NP_000099.2	DLD	1738	dihydrolipoyl dehydrogenase, mitochondrial isoform 1 precursor	0	61.777	21	11	98	11	1	509	54.1	7.85	301.28	11
1034631520	XP_016861290.1	DLG1	1739	PREDICTED: disks large homolog 1 isoform X1	0	15.916	7	4	8	4	1	926	103.3	5.92	26.76	4
226371667	NP_055565.3	DLGAP5	9787	disks large-associated protein 5 isoform a	0	17.054	6	5	13	5	1	846	95.1	9	33.22	5
19923748	NP_001924.2	DLST	1743	dihydrolipoyllysine-residue succinyltransferase component of 2-oxoglutarate dehydrogenase complex, mitochondrial isoform 1 precursor	0	22.425	13	6	42	6	1	453	48.7	8.95	136.1	6
530362992	XP_005271097.1	DMAP1	55929	PREDICTED: DNA methyltransferase 1-associated protein 1 isoform X1	0	13.775	9	3	6	3	1	489	55.2	9.28	18.77	3
767931301	XP_011530007.1	DMP1	1758	PREDICTED: dentin matrix acidic phosphoprotein 1 isoform X1	0.053	1.361	1	1	1	1	1	542	59	4.21	0	1
578819047	XP_006717743.1	DNA2	1763	PREDICTED: DNA replication ATP-dependent helicase/nuclease DNA2 isoform X1	0.003	4.362	1	1	1	1	1	1090	123.4	8.05	2.4	1
157388904	NP_060272.3	DNAAF5	54919	dynein assembly factor 5, axonemal	0	17.184	7	5	11	5	1	855	93.5	6.42	24.88	5
4504511	NP_001530.1	DNAJA1	3301	dnaJ homolog subfamily A member 1 isoform 1	0	73.005	43	12	85	12	1	397	44.8	7.08	266.74	12
5031741	NP_005871.1	DNAJA2	10294	dnaJ homolog subfamily A member 2	0	23.162	20	6	23	6	1	412	45.7	6.48	80.51	6
205360838	NP_005138.3	DNAJA3	9093	dnaJ homolog subfamily A member 3, mitochondrial isoform 1	0	18.129	11	4	13	4	1	480	52.5	9.26	37.63	4
5453690	NP_006136.1	DNAJB1	3337	dnaJ homolog subfamily B member 1 isoform 1	0	32.318	24	8	35	7	1	340	38	8.63	104.96	8
7706495	NP_057390.1	DNAJB11	51726	dnaJ homolog subfamily B member 11 precursor	0	22.447	11	4	14	4	1	358	40.5	6.18	47.16	4
72534740	NP_001026893.1	DNAJB14	79982	dnaJ homolog subfamily B member 14 isoform 1	0.003	4.534	3	1	5	1	1	379	42.5	8.59	15.38	1
952977816	NP_001304028.1	DNAJB4	11080	dnaJ homolog subfamily B member 4 isoform a	0	8.11	7	2	12	1	1	337	37.8	8.5	39.21	2
17388799	NP_490647.1	DNAJB6	10049	dnaJ homolog subfamily B member 6 isoform a	0	11.704	9	2	15	2	1	326	36.1	9.16	49.57	2
21361912	NP_071760.2	DNAJC1	64215	dnaJ homolog subfamily C member 1 precursor	0.015	2.243	2	1	1	1	1	554	63.8	8.63	2.57	1
217035105	NP_060668.2	DNAJC11	55735	dnaJ homolog subfamily C member 11	0.009	2.734	2	1	2	1	1	559	63.2	8.4	4.23	1
530374184	XP_005247302.1	DNAJC13	23317	PREDICTED: dnaJ homolog subfamily C member 13 isoform X1	0	9.34	1	2	2	2	1	2248	254.9	6.74	6.96	2
56687498	NP_056106.1	DNAJC16	23341	dnaJ homolog subfamily C member 16 isoform 1 precursor	0.002	4.98	2	1	2	1	1	782	90.5	7.12	6.02	1
1034591258	XP_016877890.1	DNAJC17	55192	PREDICTED: dnaJ homolog subfamily C member 17 isoform X1	0	6.778	9	2	4	2	1	308	35	8.87	9.41	2
21687102	NP_660304.1	DNAJC19	131118	mitochondrial import inner membrane translocase subunit TIM14 isoform 1	0	15.089	39	4	13	4	1	116	12.5	10.1	35.13	4
94538370	NP_055192.1	DNAJC2	27000	dnaJ homolog subfamily C member 2 isoform 1	0	46.475	23	11	28	11	1	621	72	8.7	81.97	11	Acetyl [N-Term]
1034643589	XP_011512267.2	DNAJC21	134218	PREDICTED: dnaJ homolog subfamily C member 21 isoform X1	0.015	2.316	1	1	1	1	1	676	78.9	8.57	2.09	1
767978915	XP_011519406.1	DNAJC3	5611	PREDICTED: dnaJ homolog subfamily C member 3 isoform X1	0	17.406	7	3	8	3	1	533	61	6.28	25.02	3
379030615	NP_001243793.1	DNAJC6	9829	putative tyrosine-protein phosphatase auxilin isoform 1	0	5.274	1	1	1	1	1	970	105.6	7.47	3.42	1
262206280	NP_003306.3	DNAJC7	7266	dnaJ homolog subfamily C member 7 isoform 1	0	141.855	41	23	111	23	1	494	56.4	6.96	432.23	23
112293277	NP_055095.2	DNAJC8	22826	dnaJ homolog subfamily C member 8	0	34.01	29	8	26	8	1	253	29.8	9.06	81.69	8
27597059	NP_056005.1	DNAJC9	23234	dnaJ homolog subfamily C member 9	0	64.034	37	12	67	12	1	260	29.9	5.73	214.16	12
4503349	NP_001366.1	DNASE2	1777	deoxyribonuclease-2-alpha precursor	0.003	4.461	3	1	1	1	1	360	39.6	8.05	2.5	1
124249392	NP_001074318.1	DNLZ	728489	DNL-type zinc finger protein	0.003	4.631	8	1	2	1	1	178	19.2	9.8	4.98	1
171460914	NP_036192.2	DNM1L	10059	dynamin-1-like protein isoform 1	0	60.01	24	15	40	1	1	736	81.8	6.81	133.9	15	Acetyl [N-Term]
510937022	NP_001265392.1	DNM1L	10059	dynamin-1-like protein isoform 4	0	54.66	24	15	35	1	1	725	80.5	6.71	102.31	15	Acetyl [N-Term]
56549123	NP_001005361.1	DNM2	1785	dynamin-2 isoform 2	0	77.324	22	18	70	18	1	870	97.9	7.46	198.31	18
767962292	XP_011537861.1	DNMBP	23268	PREDICTED: dynamin-binding protein isoform X1	0	9.946	2	2	2	2	1	1577	177.2	5.39	8.41	2
973353117	NP_001305659.1	DNMT1	1786	DNA (cytosine-5)-methyltransferase 1 isoform c	0	165.438	26	36	134	1	1	1619	183.3	7.75	422.62	36
4503351	NP_001370.1	DNMT1	1786	DNA (cytosine-5)-methyltransferase 1 isoform b	0	164.532	25	36	143	1	1	1616	183.1	7.75	438.15	36
12751473	NP_072046.2	DNMT3A	1788	DNA (cytosine-5)-methyltransferase 3A isoform a	0	7.734	2	2	4	2	1	912	101.8	6.57	9.01	2
981220813	NP_001306045.1	DNPEP	23549	aspartyl aminopeptidase isoform a	0	29.046	14	5	22	5	1	493	54.5	7.74	76.1	5
5454002	NP_006434.1	DNPH1	10591	2'-deoxynucleoside 5'-phosphate N-hydrolase 1 isoform 1	0.012	2.5	10	1	3	1	1	174	19.1	5.05	5.53	1
54633315	NP_055412.2	DNTTIP2	30836	deoxynucleotidyltransferase terminal-interacting protein 2	0	46.953	18	10	24	10	1	756	84.4	6.16	80.89	10
31377468	NP_004937.1	DOCK2	1794	dedicator of cytokinesis protein 2	0	118.431	17	22	120	22	1	1830	211.8	6.87	416.19	22
767906494	XP_011540628.1	DOCK7	85440	PREDICTED: dedicator of cytokinesis protein 7 isoform X1	0	7.619	2	4	15	3	1	2140	242.4	6.8	27.55	4
238231392	NP_982272.2	DOCK8	81704	dedicator of cytokinesis protein 8 isoform 1	0	25.522	3	5	13	4	1	2099	238.4	6.87	44.26	5
4503357	NP_001372.1	DOK1	1796	docking protein 1 isoform a	0	10.109	9	3	6	3	1	481	52.4	6.47	17.44	3	Acetyl [N-Term]
530397826	XP_005271479.1	DPAGT1	1798	PREDICTED: UDP-N-acetylglucosamine--dolichyl-phosphate N-acetylglucosaminephosphotransferase isoform X1	0.017	2.104	2	1	1	1	1	434	49	7.94	2.23	1
530397092	XP_005274206.1	DPF2	5977	PREDICTED: zinc finger protein ubi-d4 isoform X1	0	23.234	13	4	18	4	1	405	45.8	6.98	74.69	4
950426340	NP_001303963.1	DPM1	8813	dolichol-phosphate mannosyltransferase subunit 1 isoform 1	0	5.97	7	2	4	2	1	295	33.3	9.14	6.97	2
19424120	NP_061846.2	DPM3	54344	dolichol-phosphate mannosyltransferase subunit 3 isoform 1	0	13.732	18	2	9	2	1	122	13.3	8.35	28.9	2
18491024	NP_005691.2	DPP3	10072	dipeptidyl peptidase 3 isoform 1	0	66.848	18	11	85	11	1	737	82.5	5.1	311.15	11
530426726	XP_005266132.1	DPP7	29952	PREDICTED: dipeptidyl peptidase 2 isoform X1	0.009	2.888	3	1	1	1	1	565	61.8	7.87	2.31	1
1034610005	XP_016882943.1	DPP9	91039	PREDICTED: dipeptidyl peptidase 9 isoform X1	0	18.049	5	4	9	4	1	946	107.5	6.92	31.77	4
32307172	NP_001928.2	DPT	1805	dermatopontin precursor	0.068	1.235	15	1	1	1	1	201	24	4.82	0	1
578803214	XP_006712181.1	DPY30	84661	PREDICTED: protein dpy-30 homolog isoform X1	0	21.765	41	3	16	3	1	120	13.9	7.5	66.1	3	Acetyl [N-Term]
308818195	NP_001184222.1	DPYSL2	1808	dihydropyrimidinase-related protein 2 isoform 1	0	112.037	33	15	149	15	1	677	73.5	6.35	526.38	15
190194363	NP_006417.2	DPYSL4	10570	dihydropyrimidinase-related protein 4	0.004	3.868	3	1	1	1	1	572	61.8	7.09	2.63	1
4503381	NP_001929.1	DR1	1810	protein Dr1	0	8.912	16	3	11	3	1	176	19.4	4.75	37.7	3
18426973	NP_006433.2	DRAP1	10589	dr1-associated corepressor	0	9.156	17	2	4	2	1	205	22.3	5.17	12.68	2
4758796	NP_004138.1	DRG1	4733	developmentally-regulated GTP-binding protein 1	0	39.463	26	7	24	7	1	367	40.5	8.9	79.42	7
530410015	XP_005256556.1	DRG2	1819	PREDICTED: developmentally-regulated GTP-binding protein 2 isoform X1	0.002	4.99	3	1	12	1	1	385	42.9	8.48	35.75	1
13435366	NP_004940.1	DSC2	1824	desmocollin-2 isoform Dsc2b preproprotein	0.004	3.771	2	2	20	2	1	847	93.7	5.47	59.29	2
223890149	NP_001138788.1	DSN1	79980	kinetochore-associated protein DSN1 homolog isoform 1	0	10.848	12	3	8	3	1	356	40	7.05	19.28	3
58530840	NP_004406.2	DSP	1832	desmoplakin isoform I	0	6.128	1	1	2	1	1	2871	331.6	6.81	7.95	1
768013275	XP_011527444.1	DSTN	11034	PREDICTED: destrin isoform X1	0	23.688	14	4	33	1	1	165	18.5	7.85	108.72	4
555943897	NP_057532.3	DTL	51514	denticleless protein homolog isoform 1	0	13.919	7	5	11	5	1	730	79.4	8.82	17.06	5	Acetyl [N-Term]
19549327	NP_115498.2	DTNBP1	84062	dysbindin isoform a	0.008	3.01	3	1	1	1	1	351	39.5	4.67	2.15	1
530399870	XP_005268754.1	DTX3	196403	PREDICTED: probable E3 ubiquitin-protein ligase DTX3 isoform X1	0.002	5.214	3	1	4	1	1	350	38.1	8.73	8.18	1
19923717	NP_612144.1	DTX3L	151636	E3 ubiquitin-protein ligase DTX3L	0.004	3.984	2	1	1	1	1	740	83.5	8.06	2.74	1
1003701472	NP_001307834.1	DTYMK	1841	thymidylate kinase isoform 6	0	26.609	19	5	30	5	1	251	28.2	8.73	86.19	5
46485465	NP_653166.2	DUOXA1	90527	dual oxidase maturation factor 1 isoform 1	0.076	1.154	2	1	2	1	1	483	53.5	9.26	4.1	1
8923374	NP_060273.1	DUS2	54920	tRNA-dihydrouridine(20) synthase [NAD(P)+]-like isoform 1	0	8.172	6	3	4	3	1	493	55	7.11	6.9	3
239788462	NP_064560.2	DUS3L	56931	tRNA-dihydrouridine(47) synthase [NAD(P)(+)]-like isoform 1	0	104.779	29	16	88	16	1	650	72.5	8.05	331.51	16
70906441	NP_001020419.1	DUT	1854	deoxyuridine 5'-triphosphate nucleotidohydrolase, mitochondrial isoform 1 precursor	0	51.407	42	8	110	8	1	252	26.5	9.36	285.23	8
4758216	NP_004413.1	DVL2	1856	segment polarity protein dishevelled homolog DVL-2	0	13.651	9	4	11	4	1	736	78.9	6.02	22.62	4
33350932	NP_001367.2	DYNC1H1	1778	cytoplasmic dynein 1 heavy chain 1	0	271.793	13	57	214	57	1	4646	532.1	6.4	658.53	57
1003701575	NP_001307812.1	DYNC1I2	1781	cytoplasmic dynein 1 intermediate chain 2 isoform 5	0	56.094	21	8	87	8	1	632	70.6	5.24	320.16	8
166795297	NP_057225.2	DYNC1LI1	51143	cytoplasmic dynein 1 light intermediate chain 1	0	29.347	18	6	39	6	1	523	56.5	6.42	123.68	6
83267868	NP_001032584.1	DYNLL1	8655	dynein light chain 1, cytoplasmic	0	25.242	49	3	20	1	1	89	10.4	7.4	63.02	3
18087855	NP_542408.1	DYNLL2	140735	dynein light chain 2, cytoplasmic	0	19.12	49	3	15	1	1	89	10.3	7.37	50.31	3
756992492	NP_001291946.1	DYNLRB2	83657	dynein light chain roadblock-type 2 isoform 2	0.002	4.959	10	1	10	1	1	125	13.8	6.16	31.35	1
5730085	NP_006510.1	DYNLT1	6993	dynein light chain Tctex-type 1 isoform 1	0	10.445	14	1	2	1	1	113	12.4	5.08	7.72	1
5730087	NP_006511.1	DYNLT3	6990	dynein light chain Tctex-type 3	0	10.657	35	2	4	2	1	116	13.1	5.66	21.43	2
768020346	XP_011527784.1	DYRK1A	1859	PREDICTED: dual specificity tyrosine-phosphorylation-regulated kinase 1A isoform X1	0	16.169	6	4	16	4	1	770	86.2	8.75	40.17	4
815891074	NP_001295140.1	EARS2	124454	probable glutamate--tRNA ligase, mitochondrial isoform 2	0	6.262	3	2	3	2	1	534	60	8.07	7.57	2
237649012	NP_001153408.1	EBNA1BP2	10969	probable rRNA-processing protein EBP2 isoform 1	0	20.202	13	5	12	5	1	361	40.7	9.98	35.34	5
5729810	NP_006570.1	EBP	10682	3-beta-hydroxysteroid-Delta(8),Delta(7)-isomerase	0	13.821	10	2	6	2	1	230	26.3	7.9	26.3	2
70995211	NP_001389.2	ECH1	1891	delta(3,5)-Delta(2,4)-dienoyl-CoA isomerase, mitochondrial precursor	0	55.376	38	11	61	11	1	328	35.8	8	207.9	11
213417737	NP_001132982.1	ECHDC1	55862	ethylmalonyl-CoA decarboxylase isoform 5	0	12.626	12	3	12	3	1	307	33.7	8.21	29.19	3
194097323	NP_004083.3	ECHS1	1892	enoyl-CoA hydratase, mitochondrial	0	29.308	19	4	31	4	1	290	31.4	8.07	121.42	4
62530384	NP_001910.2	ECI1	1632	enoyl-CoA delta isomerase 1, mitochondrial isoform 1 precursor	0	10.782	13	3	12	3	1	302	32.8	8.54	35.27	3
260274832	NP_996667.2	ECI2	10455	enoyl-CoA delta isomerase 2, mitochondrial isoform 2	0	23.878	15	4	15	4	1	394	43.6	9	57.55	4
20149633	NP_057665.2	ECSIT	51295	evolutionarily conserved signaling intermediate in Toll pathway, mitochondrial isoform 1 precursor	0	9.673	9	2	3	2	1	431	49.1	6.29	11.64	2
19923613	NP_079359.2	EDC3	80153	enhancer of mRNA-decapping protein 3	0	11.068	7	2	6	2	1	508	56	7.11	27.6	2
45827771	NP_055144.3	EDC4	23644	enhancer of mRNA-decapping protein 4	0	95.443	17	16	87	16	1	1401	151.6	5.86	305.01	16
985801665	NP_001306889.1	EDEM3	80267	ER degradation-enhancing alpha-mannosidase-like protein 3 isoform 1 precursor	0.004	3.931	1	1	1	1	1	948	106.3	4.98	3.16	1
4503453	NP_003783.1	EDF1	8721	endothelial differentiation-related factor 1 isoform alpha	0	23.321	24	4	32	4	1	148	16.4	9.95	113.49	4
767975501	XP_011537116.1	EEA1	8411	PREDICTED: early endosome antigen 1 isoform X1	0	23.348	6	7	10	7	1	1453	167.2	5.66	28.66	7
808175997	NP_001294936.1	EED	8726	polycomb protein EED isoform c	0	36.94	17	7	23	7	1	466	53	7.36	76.33	7
4503471	NP_001393.1	EEF1A1	1915	elongation factor 1-alpha 1	0	159.81	43	19	515	19	1	462	50.1	9.01	1777.42	19
4503477	NP_001950.1	EEF1B2	1933	elongation factor 1-beta	0	23.192	28	5	131	5	1	225	24.7	4.67	351.51	5
1034659499	XP_016868658.1	EEF1D	1936	PREDICTED: elongation factor 1-delta isoform X1	0	65.908	16	8	152	2	1	688	75.6	6.43	697.4	8
578815866	XP_006716583.1	EEF1D	1936	PREDICTED: elongation factor 1-delta isoform X3	0	59.907	14	7	97	1	1	664	73	6.34	345.1	7
4758862	NP_004271.1	EEF1E1	9521	eukaryotic translation elongation factor 1 epsilon-1 isoform 1	0	15.207	14	2	11	2	1	174	19.8	8.54	39.72	2
4503481	NP_001395.1	EEF1G	1937	elongation factor 1-gamma	0	122.67	33	15	241	15	1	437	50.1	6.67	944.04	15
4503483	NP_001952.1	EEF2	1938	elongation factor 2	0	247.269	41	32	478	31	1	858	95.3	6.83	1625.78	32
54607086	NP_068756.2	EEFSEC	60678	selenocysteine-specific elongation factor	0	30.003	8	4	14	4	1	596	65.3	8.35	54.47	4
20149675	NP_077305.2	EFHD2	79180	EF-hand domain-containing protein D2	0	25.179	26	7	14	7	1	240	26.7	5.2	44.72	7
1017207212	NP_001309774.1	EFL1	79631	elongation factor-like GTPase 1 isoform 1	0	9.134	2	2	12	2	1	1120	125.4	5.91	39	2
1034583872	XP_016875895.1	EFNB2	1948	PREDICTED: ephrin-B2 isoform X1	0.002	5.083	6	2	3	2	1	335	37.5	9.35	8	2
1021087293	NP_001310487.1	EFR3A	23167	protein EFR3 homolog A isoform 3	0.009	2.905	1	1	2	1	1	838	94.8	7.17	2.15	1
217272892	NP_004238.3	EFTUD2	9343	116 kDa U5 small nuclear ribonucleoprotein component isoform a	0	135.45	27	21	155	20	1	972	109.4	5	583.18	21
268607667	NP_001161362.1	EGFL6	25975	epidermal growth factor-like protein 6 isoform 2 precursor	0.031	1.787	10	1	1	1	1	554	61.3	8.06	0	1
578821249	XP_006718549.1	EHBP1L1	254102	PREDICTED: EH domain-binding protein 1-like protein 1 isoform X1	0.012	2.566	1	1	1	1	1	1535	163	4.87	2.59	1
540344515	NP_001269373.1	EHD1	10938	EH domain-containing protein 1 isoform 1	0	12.397	6	3	10	3	1	534	60.6	6.83	14	3	Acetyl [N-Term]
21264315	NP_644670.1	EHD4	30844	EH domain-containing protein 4	0	6.506	5	2	2	2	1	541	61.1	6.76	5.24	2
767958292	XP_011517323.1	EHMT1	79813	PREDICTED: histone-lysine N-methyltransferase EHMT1 isoform X1	0.004	3.836	1	1	1	1	1	1301	142	5.83	1.71	1
578811380	XP_006715038.1	EHMT2	10919	PREDICTED: histone-lysine N-methyltransferase EHMT2 isoform X3	0	21.286	7	4	6	4	1	1240	136.1	6.13	25.58	4
5032133	NP_005792.1	EIF1	10209	eukaryotic translation initiation factor 1	0	29.637	23	4	28	4	1	113	12.7	7.44	128.64	4
335334945	NP_001229412.1	EIF1AD	84285	probable RNA-binding protein EIF1AD	0	12.63	10	1	7	1	1	165	19	5.21	37.77	1
54873624	NP_114414.2	EIF2A	83939	eukaryotic translation initiation factor 2A isoform 1	0	63.838	24	10	69	10	1	585	64.9	8.87	245.3	10
767914900	XP_011531289.1	EIF2AK2	5610	PREDICTED: interferon-induced, double-stranded RNA-activated protein kinase isoform X1	0	17.288	11	5	14	5	1	551	62.1	8.4	39.37	5
4503503	NP_001405.1	EIF2B1	1967	translation initiation factor eIF-2B subunit alpha	0	10.442	11	3	11	3	1	305	33.7	7.33	22.99	3	Acetyl [N-Term]
7657058	NP_055054.1	EIF2B2	8892	translation initiation factor eIF-2B subunit beta	0	35.147	16	5	26	5	1	351	39	6.16	84.92	5
9966779	NP_065098.1	EIF2B3	8891	translation initiation factor eIF-2B subunit gamma isoform 1	0	34.591	27	8	24	8	1	452	50.2	6.47	85.16	8
974987436	NP_001305894.1	EIF2B4	8890	translation initiation factor eIF-2B subunit delta isoform 4	0	45.658	17	7	37	1	1	544	59.7	9.42	137.36	7
187607323	NP_751945.2	EIF2B4	8890	translation initiation factor eIF-2B subunit delta isoform 1	0	45.032	17	7	33	1	1	543	59.6	9.42	122.83	7
83267879	NP_003898.2	EIF2B5	8893	translation initiation factor eIF-2B subunit epsilon	0	30.747	12	7	29	7	1	721	80.3	5.08	72.03	7
56699485	NP_008824.2	EIF2D	1939	eukaryotic translation initiation factor 2D isoform 1	0.004	4.285	3	1	1	1	1	584	64.7	7.65	4.26	1
4758256	NP_004085.1	EIF2S1	1965	eukaryotic translation initiation factor 2 subunit 1	0	74.706	38	12	111	12	1	315	36.1	5.08	334.23	12
29826335	NP_003899.2	EIF2S2	8894	eukaryotic translation initiation factor 2 subunit 2 isoform 1	0	90.701	50	16	75	16	1	333	38.4	5.8	233.99	16
4503507	NP_001406.1	EIF2S3	1968	eukaryotic translation initiation factor 2 subunit 3	0	63.219	29	12	53	12	1	472	51.1	8.4	188.62	12
4503509	NP_003741.1	EIF3A	8661	eukaryotic translation initiation factor 3 subunit A	0	175.265	27	38	197	38	1	1382	166.5	6.79	639.82	38
767945997	XP_011513901.1	EIF3B	8662	PREDICTED: eukaryotic translation initiation factor 3 subunit B isoform X1	0	119.199	29	21	183	21	1	814	92.4	5	620.67	21	Acetyl [N-Term]
4503525	NP_003743.1	EIF3C	8663	eukaryotic translation initiation factor 3 subunit C isoform a	0	146.926	23	21	161	21	1	913	105.3	5.68	643.24	21
4503523	NP_003744.1	EIF3D	8664	eukaryotic translation initiation factor 3 subunit D	0	66.804	24	11	76	11	1	548	63.9	6.05	255.3	11
4503521	NP_001559.1	EIF3E	3646	eukaryotic translation initiation factor 3 subunit E	0	48.756	22	10	60	10	1	445	52.2	6.04	174.25	10
4503519	NP_003745.1	EIF3F	8665	eukaryotic translation initiation factor 3 subunit F	0	35.723	22	7	75	7	1	357	37.5	5.45	205.24	7
49472822	NP_003746.2	EIF3G	8666	eukaryotic translation initiation factor 3 subunit G	0	38.706	28	6	59	6	1	320	35.6	6.13	163.59	6
4503515	NP_003747.1	EIF3H	8667	eukaryotic translation initiation factor 3 subunit H	0	27.13	21	8	33	8	1	352	39.9	6.54	88.83	8
4503513	NP_003748.1	EIF3I	8668	eukaryotic translation initiation factor 3 subunit I	0	61.61	38	9	85	9	1	325	36.5	5.64	303.1	9
83281438	NP_003749.2	EIF3J	8669	eukaryotic translation initiation factor 3 subunit J isoform 1	0	32.851	21	6	19	6	1	258	29	4.83	73.81	6
10801345	NP_037366.1	EIF3K	27335	eukaryotic translation initiation factor 3 subunit K isoform 1	0	17.867	20	3	25	3	1	218	25	4.93	77.67	3
7705433	NP_057175.1	EIF3L	51386	eukaryotic translation initiation factor 3 subunit L isoform 1	0	85.414	27	15	119	15	1	564	66.7	6.34	392.35	15
23397429	NP_006351.2	EIF3M	10480	eukaryotic translation initiation factor 3 subunit M isoform 1	0.002	5.074	3	1	9	1	1	374	42.5	5.63	20.2	1
4503529	NP_001407.1	EIF4A1	1973	eukaryotic initiation factor 4A-I isoform 1	0	164.583	45	17	256	9	1	406	46.1	5.48	904.12	17
83700235	NP_001958.2	EIF4A2	1974	eukaryotic initiation factor 4A-II	0	59.304	24	9	128	1	1	407	46.4	5.48	364.85	9
7661920	NP_055555.1	EIF4A3	9775	eukaryotic initiation factor 4A-III	0	89.117	28	12	114	10	1	411	46.8	6.73	442.87	12
664805999	NP_001287750.1	EIF4B	1975	eukaryotic translation initiation factor 4B isoform 1	0	112.99	38	20	221	20	1	616	69.7	5.67	682.87	20
194578909	NP_001124151.1	EIF4E	1977	eukaryotic translation initiation factor 4E isoform 2	0	21.836	16	4	55	4	1	248	28.8	6.42	197.02	4
4758258	NP_004086.1	EIF4EBP1	1978	eukaryotic translation initiation factor 4E-binding protein 1	0	6.381	22	1	4	1	1	118	12.6	5.48	19.59	1
4758260	NP_004087.1	EIF4EBP2	1979	eukaryotic translation initiation factor 4E-binding protein 2	0	8.864	26	1	10	1	1	120	12.9	6.67	35.8	1
302699237	NP_886553.3	EIF4G1	1981	eukaryotic translation initiation factor 4 gamma 1 isoform 1	0	144.399	20	28	153	2	1	1600	175.5	5.33	479.81	28
38201625	NP_937885.1	EIF4G1	1981	eukaryotic translation initiation factor 4 gamma 1 isoform 3	0	142.386	21	27	163	1	1	1435	158.4	5.21	495.75	27	Acetyl [N-Term]
289577080	NP_001409.3	EIF4G2	1982	eukaryotic translation initiation factor 4 gamma 2 isoform 1	0	76.108	17	12	138	12	1	907	102.3	7.14	462.51	12	Acetyl [N-Term]
767906594	XP_011540672.1	EIF4G3	8672	PREDICTED: eukaryotic translation initiation factor 4 gamma 3 isoform X1	0	28.437	4	6	30	1	1	1678	187	5.77	69.04	6
11559923	NP_071496.1	EIF4H	7458	eukaryotic translation initiation factor 4H isoform 1	0	28.973	21	6	50	6	1	248	27.4	7.23	154.43	6
21361337	NP_001960.2	EIF5	1983	eukaryotic translation initiation factor 5	0	31.257	17	8	31	8	1	431	49.2	5.58	93.57	8
219555707	NP_001137232.1	EIF5A	1984	eukaryotic translation initiation factor 5A-1 isoform A	0	101.163	30	8	163	8	1	184	20.2	7.01	735.65	8
84043963	NP_056988.3	EIF5B	9669	eukaryotic translation initiation factor 5B	0	132.279	24	23	105	23	1	1220	138.7	5.49	417.55	23
4504771	NP_002203.1	EIF6	3692	eukaryotic translation initiation factor 6 isoform a	0	27.972	23	4	34	4	1	245	26.6	4.68	124.68	4
8922122	NP_061166.1	ELAC1	55520	zinc phosphodiesterase ELAC protein 1	0.006	3.362	4	1	1	1	1	363	40	6.79	2.93	1
145553959	NP_060597.4	ELAC2	60528	zinc phosphodiesterase ELAC protein 2 isoform 1	0	68.16	20	14	70	14	1	826	92.2	7.9	217.6	14
38201714	NP_001410.2	ELAVL1	1994	ELAV-like protein 1	0	70.736	47	13	118	13	1	326	36.1	9.17	405	13
530402138	XP_005266334.1	ELF1	1997	PREDICTED: ETS-related transcription factor Elf-1 isoform X1	0	60.92	28	9	44	9	1	619	67.5	5.21	173.87	9
5729812	NP_006523.1	ELL	8178	RNA polymerase II elongation factor ELL	0	17.026	9	4	7	4	1	621	68.2	9.33	22.48	4
578813708	XP_006715868.1	ELMO1	9844	PREDICTED: engulfment and cell motility protein 1 isoform X1	0	50.752	14	10	53	8	1	727	83.8	6.28	178.09	10
530418279	XP_005260553.1	ELMO2	63916	PREDICTED: engulfment and cell motility protein 2 isoform X1	0	29.562	11	6	14	4	1	720	82.6	5.9	40.16	6
530377465	XP_005262942.1	ELMOD2	255520	PREDICTED: ELMO domain-containing protein 2 isoform X1	0.003	4.33	3	1	1	1	1	305	36.4	8.34	2.27	1
1034609713	XP_016882845.1	ELOF1	84337	PREDICTED: transcription elongation factor 1 homolog isoform X1	0	9.363	17	1	5	1	1	104	11.7	8.27	15.65	1
338968885	NP_001229804.1	ELP2	55250	elongator complex protein 2 isoform 1	0	5.306	2	2	2	2	1	891	99.9	6.42	2.18	2
23510283	NP_060561.3	ELP3	55140	elongator complex protein 3 isoform 1	0	12.681	6	3	9	3	1	547	62.2	8.88	22.76	3
570359564	NP_001275655.1	ELP4	26610	elongator complex protein 4 isoform 3	0.004	3.617	2	1	3	1	1	535	58.8	8.51	8.14	1
767991946	XP_011522081.1	ELP5	23587	PREDICTED: elongator complex protein 5 isoform X1	0.002	4.851	4	1	4	1	1	316	34.8	4.97	9.86	1
530360927	XP_005245844.1	EMC1	23065	PREDICTED: ER membrane protein complex subunit 1 isoform X1	0	10.279	3	2	14	2	1	996	112	7.66	49.32	2
7661910	NP_055488.1	EMC2	9694	ER membrane protein complex subunit 2	0	14.83	12	3	13	3	1	297	34.8	6.57	42.94	3
530372853	XP_005265378.1	EMC3	55831	PREDICTED: ER membrane protein complex subunit 3 isoform X1	0	14.641	15	3	6	3	1	262	29.9	9.79	18.32	3
62339424	NP_001014764.1	EMC6	83460	ER membrane protein complex subunit 6	0.004	4.019	9	1	1	1	1	110	12	10.07	3.45	1
9910346	NP_064539.1	EMC7	56851	ER membrane protein complex subunit 7 precursor	0.008	2.925	5	1	5	1	1	242	26.5	9.25	11.36	1
5174615	NP_006058.1	EMC8	10328	ER membrane protein complex subunit 8 isoform 1	0	10.091	13	3	10	3	1	210	23.8	6.4	29.37	3
4557553	NP_000108.1	EMD	2010	emerin	0	39.724	42	8	48	8	1	254	29	5.5	149.84	8	Acetyl [N-Term]
194328699	NP_006322.4	EMG1	10436	ribosomal RNA small subunit methyltransferase NEP1 isoform 1	0	26.23	20	4	23	4	1	244	26.7	9.17	77.46	4
300795584	NP_001180197.1	EML2	24139	echinoderm microtubule-associated protein-like 2 isoform 1	0	5.566	2	1	2	1	1	850	92	7.06	9.14	1
19923497	NP_061936.2	EML4	27436	echinoderm microtubule-associated protein-like 4 isoform a	0	44.737	17	10	29	10	1	981	108.8	6.32	102.83	10
767968536	XP_011543477.1	EMSY	56946	PREDICTED: BRCA2-interacting transcriptional repressor EMSY isoform X3	0	14.327	3	3	6	3	1	1339	143.1	9.28	18.47	3
1034560035	XP_016857235.1	ENAH	55740	PREDICTED: protein enabled homolog isoform X1	0	31.471	10	6	11	6	1	876	96.2	10.9	39.13	6
53759134	NP_004426.2	ENDOG	2021	endonuclease G, mitochondrial precursor	0.002	5.138	6	1	2	1	1	297	32.6	9.5	7.31	1
4503571	NP_001419.1	ENO1	2023	alpha-enolase isoform 1	0	223.971	53	30	595	28	1	434	47.1	7.39	1978.94	30
5803011	NP_001966.1	ENO2	2026	gamma-enolase	0	47.549	18	6	125	4	1	434	47.2	5.03	454.27	6
530410063	XP_005256578.1	ENO3	2027	PREDICTED: beta-enolase isoform X1	0	31.382	12	4	156	1	1	443	48	8.16	598.18	4
4758272	NP_004427.1	ENSA	2029	alpha-endosulfine isoform 3	0	19.756	33	4	28	2	1	121	13.4	7.24	86.36	4
9910186	NP_064574.1	ENY2	56943	transcription and mRNA export factor ENY2 isoform 1	0	15.029	37	3	13	3	1	101	11.5	9.33	37.59	3
50345997	NP_001420.2	EP300	2033	histone acetyltransferase p300	0	20.124	3	5	11	2	1	2414	264	8.5	37.37	5
331284125	NP_056224.3	EP400	57634	E1A-binding protein p400	0	30.902	3	7	17	7	1	3123	339.6	9.16	40.09	7
1034556377	XP_016856073.1	EPB41	2035	PREDICTED: protein 4.1 isoform X1	0	16.616	3	2	8	2	1	1031	114.7	5.54	37.7	2
1034648755	XP_016865839.1	EPB41L2	2037	PREDICTED: band 4.1-like protein 2 isoform X1	0	31.409	8	7	23	7	1	1057	118.4	5.49	60.88	7
1034615465	XP_016860056.1	EPB41L5	57669	PREDICTED: band 4.1-like protein 5 isoform X1	0	12.777	9	3	10	3	1	740	82.6	6.58	37.49	3
13376810	NP_079485.1	EPC1	80314	enhancer of polycomb homolog 1 isoform a	0.016	2.164	1	1	1	1	1	836	93.4	8.59	1.6	1
345110632	NP_060019.2	EPDR1	54749	mammalian ependymin-related protein 1 isoform 1 precursor	0	6.794	9	2	2	2	1	224	25.4	6.6	5.9	2
767947027	XP_011514182.1	EPHB6	2051	PREDICTED: ephrin type-B receptor 6 isoform X1	0	12.538	3	2	8	2	1	1022	110.7	6.65	35.86	2
27597073	NP_001970.2	EPHX2	2053	bifunctional epoxide hydrolase 2 isoform a	0	25.744	13	5	45	5	1	555	62.6	6.28	131.78	5
7662294	NP_055620.1	EPM2AIP1	9852	EPM2A-interacting protein 1	0	11.211	4	2	6	2	1	607	70.3	6.11	22.65	2
194272148	NP_001123543.1	EPN1	29924	epsin-1 isoform a	0	11.358	5	2	7	2	1	662	69	5.05	17.02	2
62241042	NP_004437.2	EPRS	2058	bifunctional glutamate/proline--tRNA ligase	0	301.793	37	50	302	50	1	1512	170.5	7.33	1080.28	50
1034556458	XP_016856104.1	EPS15	2060	PREDICTED: epidermal growth factor receptor substrate 15 isoform X1	0	14.356	5	3	7	3	1	933	102.4	4.7	24.67	3
1034608806	XP_016882575.1	EPS15L1	58513	PREDICTED: epidermal growth factor receptor substrate 15-like 1 isoform X1	0	38.088	13	8	26	8	1	926	101.3	5.07	89.63	8
24307899	NP_005693.1	ERAL1	26284	GTPase Era, mitochondrial isoform 1	0	7.542	6	2	6	2	1	437	48.3	8.84	12.64	2
530380011	XP_005272073.1	ERAP1	51752	PREDICTED: endoplasmic reticulum aminopeptidase 1 isoform X1	0	30.533	10	8	30	8	1	951	108.3	6.57	78.31	8
11641261	NP_071745.1	ERAP2	64167	endoplasmic reticulum aminopeptidase 2	0	10.119	2	2	13	2	1	960	110.4	6.71	44.54	2
530379403	XP_005248611.1	ERBIN	55914	PREDICTED: protein LAP2 isoform X1	0	14.108	3	4	11	4	1	1460	163.3	5.67	19.57	4
15834617	NP_000391.1	ERCC2	2068	TFIIH basal transcription factor complex helicase XPD subunit isoform 1	0	11.309	3	2	4	2	1	760	86.9	7.15	11.79	2
767917181	XP_011509096.1	ERCC3	2071	PREDICTED: TFIIH basal transcription factor complex helicase XPB subunit isoform X1	0	8.835	5	2	7	2	1	788	89.9	7.24	27.06	2
767987039	XP_011520726.1	ERCC4	2072	PREDICTED: DNA repair endonuclease XPF isoform X1	0.003	4.54	1	1	6	1	1	962	109.6	7.05	16.28	1
58331268	NP_060139.2	ERCC6L	54821	DNA excision repair protein ERCC-6-like	0	6.493	2	1	3	1	1	1250	141	5.31	16.1	1
767938496	XP_011532899.1	ERGIC1	57222	PREDICTED: endoplasmic reticulum-Golgi intermediate compartment protein 1 isoform X1	0	20.664	17	5	22	5	1	314	35.1	7.27	65.99	5
50959176	NP_057654.2	ERGIC2	51290	endoplasmic reticulum-Golgi intermediate compartment protein 2	0.002	4.92	3	1	1	1	1	377	42.5	6.77	3.47	1
38327615	NP_938408.1	ERGIC3	51614	endoplasmic reticulum-Golgi intermediate compartment protein 3 isoform a	0.022	1.99	2	1	3	1	1	388	43.7	6.04	6.14	1
4758302	NP_004441.1	ERH	2079	enhancer of rudimentary homolog	0	53.937	40	6	94	6	1	104	12.3	5.92	320.31	6
1034661913	XP_016869438.1	ERI1	90459	PREDICTED: 3'-5' exoribonuclease 1 isoform X1	0	8.777	6	2	5	2	1	402	45.9	8.21	12.84	2
74136559	NP_076971.1	ERI3	79033	ERI1 exoribonuclease 3 isoform 1	0.003	4.59	3	1	1	1	1	337	37.2	8.07	2.34	1
20070264	NP_056516.2	ERLEC1	27248	endoplasmic reticulum lectin 1 isoform 1 precursor	0.002	5.116	3	1	2	1	1	483	54.8	6.28	10.78	1
530392883	XP_005269499.1	ERLIN1	10613	PREDICTED: erlin-1 isoform X1	0	10.522	9	2	9	1	1	348	39.1	7.87	40.99	2
6005721	NP_009106.1	ERLIN2	11160	erlin-2 isoform 1	0	9.025	6	2	6	1	1	339	37.8	5.62	18.03	2
7657069	NP_055399.1	ERO1A	30001	ERO1-like protein alpha precursor	0	22.173	13	4	20	4	1	468	54.4	5.68	80.98	4
5803013	NP_006808.1	ERP29	10961	endoplasmic reticulum resident protein 29 isoform 1 precursor	0	45.471	33	7	103	7	1	261	29	7.31	391.05	7
52487191	NP_055866.1	ERP44	23071	endoplasmic reticulum resident protein 44 precursor	0	27.138	12	5	35	4	1	406	46.9	5.26	93.38	5
62899035	NP_001017420.1	ESCO2	157570	N-acetyltransferase ESCO2	0	10.743	5	2	3	2	1	601	68.3	9.39	11.07	2
530402140	XP_005266335.1	ESD	2098	PREDICTED: S-formylglutathione hydrolase isoform X1	0	58.101	33	9	107	9	1	282	31.4	7.02	410.35	9
444909146	NP_001263309.1	ESF1	51575	ESF1 homolog	0	41.765	10	9	18	9	1	851	98.7	5.11	69.95	9
767979991	XP_011534849.1	ESRRB	2103	PREDICTED: steroid hormone receptor ERR2 isoform X1	0.024	1.949	3	1	1	1	1	573	63.4	8.09	0	1
296317244	NP_001171725.1	ESYT1	23344	extended synaptotagmin-1 isoform 1	0	56.44	13	10	47	10	1	1114	123.9	5.78	175.09	10
45387945	NP_065779.1	ESYT2	57488	extended synaptotagmin-2	0	93.489	22	14	68	14	1	893	98.8	8.68	238.89	14
4759034	NP_004721.1	ETF1	2107	eukaryotic peptide chain release factor subunit 1 isoform 1	0	22.433	10	4	50	4	1	437	49	5.71	142.2	4
4503607	NP_000117.1	ETFA	2108	electron transfer flavoprotein subunit alpha, mitochondrial isoform a	0	33.351	32	8	41	8	1	333	35.1	8.38	127.79	8
4503609	NP_001976.1	ETFB	2109	electron transfer flavoprotein subunit beta isoform 1	0	47.391	40	8	37	8	1	255	27.8	8.1	138.65	8
119703746	NP_004444.2	ETFDH	2110	electron transfer flavoprotein-ubiquinone oxidoreductase, mitochondrial isoform 1 precursor	0	20.895	10	5	8	5	1	617	68.5	7.55	23.87	5
41327741	NP_055112.2	ETHE1	23474	persulfide dioxygenase ETHE1, mitochondrial isoform 1	0	17.203	18	4	14	4	1	254	27.9	6.83	43.2	4
767969711	XP_011540951.1	ETS1	2113	PREDICTED: protein C-ets-1 isoform X1	0.002	5.117	3	2	4	2	1	519	58.8	5.08	9.3	2
4503611	NP_001978.1	ETV6	2120	transcription factor ETV6	0.016	2.141	2	1	1	1	1	452	53	7.43	2.47	1
530427458	XP_005272515.1	EVI5L	115704	PREDICTED: EVI5-like protein isoform X1	0.005	3.526	1	1	1	1	1	805	92.5	5.31	2.71	1
530403962	XP_005267806.1	EVL	51466	PREDICTED: ena/VASP-like protein isoform X2	0	86.796	35	12	60	12	1	422	45.4	8.34	224.96	12
253970500	NP_053733.2	EWSR1	2130	RNA-binding protein EWS isoform 1	0	43.69	11	4	102	4	1	661	68.9	9.29	460.43	4
530376799	XP_005265805.1	EXOC1	55763	PREDICTED: exocyst complex component 1 isoform X1	0	7.3	3	1	4	1	1	912	104.1	6.67	16.41	1
1034650780	XP_016866511.1	EXOC2	55770	PREDICTED: exocyst complex component 2 isoform X1	0	6.963	3	2	2	2	1	924	104	6.9	3.75	2
767981916	XP_011535625.1	EXOC3L4	91828	PREDICTED: exocyst complex component 3-like protein 4 isoform X1	0.04	1.638	1	1	7	1	1	780	85.7	6.58	12.74	1
82546830	NP_068579.3	EXOC4	60412	exocyst complex component 4 isoform a	0	29.92	8	6	15	6	1	974	110.4	6.49	42.7	6
530402968	XP_005267329.1	EXOC5	10640	PREDICTED: exocyst complex component 5 isoform X1	0	5.287	2	1	4	1	1	746	85.4	6.87	16.96	1
223718046	NP_001138769.1	EXOC7	23265	exocyst complex component 7 isoform 4	0	18.858	8	4	7	4	1	735	83.3	6.79	22.89	4
44921615	NP_787072.2	EXOC8	149371	exocyst complex component 8	0	7.821	3	2	5	2	1	725	81.7	5.49	19.8	2
224451073	NP_005098.2	EXOG	9941	nuclease EXOG, mitochondrial isoform 1 precursor	0.004	3.688	2	1	2	1	1	368	41.1	8.27	4.9	1
7705612	NP_057130.1	EXOSC1	51013	exosome complex component CSL4 isoform a	0	21.65	23	3	15	3	1	195	21.4	8.24	59.8	3
767904671	XP_005263532.2	EXOSC10	5394	PREDICTED: exosome component 10 isoform X1	0	59.015	21	14	57	14	1	890	101.3	8.46	159.47	14
19923403	NP_055100.2	EXOSC2	23404	exosome complex component RRP4 isoform 1	0	8.467	9	2	4	2	1	293	32.8	7.5	15.12	2
50511943	NP_057126.2	EXOSC3	51010	exosome complex component RRP40 isoform 1	0	11.085	14	3	5	3	1	275	29.6	8.1	15.34	3
9506689	NP_061910.1	EXOSC4	54512	exosome complex component RRP41	0	23.29	22	4	12	4	1	245	26.4	6.52	41.95	4
47174864	NP_064543.3	EXOSC5	56915	exosome complex component RRP46	0	16.633	10	2	10	2	1	235	25.2	7.59	40.58	2	Acetyl [N-Term]
17402904	NP_478126.1	EXOSC6	118460	exosome complex component MTR3	0	31.068	24	5	37	5	1	272	28.2	6.28	150.7	5
189083688	NP_055819.2	EXOSC7	23016	exosome complex component RRP42	0	26.236	23	4	14	4	1	291	31.8	5.19	62.53	4
31415882	NP_852480.1	EXOSC8	11340	exosome complex component RRP43	0	25.504	30	7	25	7	1	276	30	5.3	83.45	7
77812672	NP_001029366.1	EXOSC9	5393	exosome complex component RRP45 isoform 1	0	21.918	11	5	17	5	1	456	50.8	5.3	53.22	5
1034556550	XP_016856144.1	EYA3	2140	PREDICTED: eyes absent homolog 3 isoform X2	0	17.195	9	3	8	3	1	591	64.4	5.4	33.97	3	Acetyl [N-Term]
1034654383	XP_016867306.1	EZH2	2146	PREDICTED: histone-lysine N-methyltransferase EZH2 isoform X1	0	48.326	17	8	26	8	1	759	87	7.3	112.12	8
161702986	NP_001104547.1	EZR	7430	ezrin	0	128.364	39	27	247	19	1	586	69.4	6.27	794.62	27
195972892	NP_777572.2	FAAH2	158584	fatty-acid amide hydrolase 2	0.05	1.396	2	1	3	1	1	532	58.3	9.07	6.01	1
4557581	NP_001435.1	FABP5	2171	fatty acid-binding protein, epidermal	0	129.341	81	13	208	13	1	135	15.2	7.01	954.18	13
4758334	NP_004256.1	FADS2	9415	fatty acid desaturase 2 isoform 1	0	10.016	6	2	5	2	1	444	52.2	8.82	15.73	2
5901948	NP_008982.1	FAF1	11124	FAS-associated factor 1	0	35.068	14	8	36	8	1	650	73.9	4.88	151.88	8
24797106	NP_055428.1	FAF2	23197	FAS-associated factor 2	0	17.636	12	4	14	4	1	445	52.6	5.62	58.1	4
4557587	NP_000128.1	FAH	2184	fumarylacetoacetase	0.002	4.736	3	1	3	1	1	419	46.3	6.95	9.12	1
767918388	XP_011509586.1	FAHD2A	51011	PREDICTED: fumarylacetoacetate hydrolase domain-containing protein 2A isoform X1	0	27.996	21	5	18	5	1	339	37.7	8.5	72.11	5
13899289	NP_113640.1	FAM103A1	83640	RNMT-activating mini protein	0	10.74	11	1	7	1	1	118	14.4	8.94	23.16	1
40254982	NP_113641.2	FAM107B	83641	protein FAM107B isoform b	0	7.512	5	1	2	1	1	306	34.7	7.01	6.46	1
38505209	NP_071357.2	FAM111A	63901	protein FAM111A	0	8.463	5	2	2	2	1	611	70.2	8.53	8.5	2
93102375	NP_061161.2	FAM114A2	10827	protein FAM114A2 isoform 1	0	9.283	7	3	4	3	1	505	55.4	4.88	7.95	3
254910983	NP_775782.2	FAM117B	150864	protein FAM117B	0	6.415	3	2	10	2	1	589	61.9	9.82	24.66	2
767956728	XP_011516714.1	FAM120A	23196	PREDICTED: constitutive coactivator of PPAR-gamma-like protein 1 isoform X1	0	125.593	23	19	93	18	1	1146	125.2	9	364.91	19
597709760	NP_060318.4	FAM120C	54954	constitutive coactivator of PPAR-gamma-like protein 2 isoform 1	0	6.546	2	2	9	1	1	1096	120.5	9.03	30.23	2
1034606711	XP_016881942.1	FAM129C	199786	PREDICTED: niban-like protein 2 isoform X1	0.08	1.121	1	1	3	1	1	738	82.3	8.19	6.25	1
1034674105	XP_016884945.1	FAM133A	286499	PREDICTED: protein FAM133A isoform X1	0.002	4.867	4	1	11	1	1	248	28.9	10.1	35.99	1
30023820	NP_835227.1	FAM134C	162427	protein FAM134C	0	7.957	4	2	7	2	1	466	51.4	4.97	18.56	2
189491675	NP_116211.2	FAM136A	84908	protein FAM136A	0	28.335	47	6	23	6	1	138	15.6	7.61	78.29	6
578820852	XP_006718406.1	FAM160A2	84067	PREDICTED: FTS and Hook-interacting protein isoform X1	0.009	2.648	1	1	1	1	1	986	107	6.77	2.6	1
205277427	NP_065991.3	FAM160B1	57700	protein FAM160B1 isoform a	0	16.582	7	3	12	3	1	765	86.5	5.29	49.53	3
49355721	NP_055182.3	FAM162A	26355	protein FAM162A	0	12.687	12	3	13	3	1	154	17.3	9.77	53.37	3
554506505	NP_001272979.1	FAM168A	23201	protein FAM168A isoform 1	0.002	4.868	7	1	10	1	1	244	26.2	8.98	29.47	1	Acetyl [N-Term]
1012443707	NP_001308677.1	FAM168B	130074	myelin-associated neurite-outgrowth inhibitor	0.002	4.702	9	1	4	1	1	195	20.3	9.23	9.73	1	Acetyl [N-Term]
767935680	XP_011541608.1	FAM169A	26049	PREDICTED: soluble lamin-associated protein of 75 kDa isoform X1	0	9.672	5	2	7	2	1	670	74.9	4.6	23.18	2
21362018	NP_114431.2	FAM172A	83989	protein FAM172A isoform 1 precursor	0.005	3.565	4	1	1	1	1	416	47.9	6.09	2.94	1
109148531	NP_620775.2	FAM175A	84142	BRCA1-A complex subunit Abraxas	0	8.208	6	2	3	2	1	409	46.6	7.05	9.67	2
148529023	NP_115558.3	FAM175B	23172	BRISC complex subunit Abro1	0	36.796	29	8	25	8	1	415	46.9	6.21	81.27	8
13376431	NP_079224.1	FAM188A	80013	protein FAM188A isoform a	0.003	4.653	3	1	1	1	1	445	49.7	4.77	2.81	1
1034596035	XP_016879173.1	FAM192A	80011	PREDICTED: protein FAM192A isoform X5	0	47.996	29	9	60	9	1	254	28.9	5.45	198.52	9	Acetyl [N-Term]
17158023	NP_478070.1	FAM207A	85395	protein FAM207A isoform 1	0.01	2.595	6	1	1	1	1	230	25.4	11.08	2.61	1
530372165	XP_005265056.1	FAM208A	23272	PREDICTED: protein TASOR isoform X1	0	31.261	4	7	25	7	1	1670	188.9	5.8	68.35	7
54124343	NP_001005751.1	FAM21A	387680	WASH complex subunit FAM21A isoform 1	0	10.79	2	2	5	2	1	1341	147.1	4.81	21.07	2
767987709	XP_011520993.1	FAM234A	83986	PREDICTED: protein FAM234A isoform X1	0.04	1.641	2	1	1	1	1	552	59.6	6.28	0	1
7661696	NP_054796.1	FAM32A	26017	protein FAM32A	0	16.394	31	4	23	4	1	112	13.2	9.99	72.16	4	Acetyl [N-Term]
7661714	NP_055703.1	FAM3C	10447	protein FAM3C precursor	0.002	4.918	5	1	2	1	1	227	24.7	8.29	5.48	1
1034660621	XP_016869032.1	FAM49B	51571	PREDICTED: protein FAM49B isoform X1	0	51.275	33	7	29	7	1	324	36.7	6.06	98.98	7
4758220	NP_004690.1	FAM50A	9130	protein FAM50A	0	22.713	14	4	13	4	1	339	40.2	6.83	48.52	4
767972273	XP_011519105.1	FAM60A	58516	PREDICTED: protein FAM60A isoform X1	0	13.415	9	2	9	2	1	328	36	9.54	32.33	2
219881536	NP_001137384.1	FAM76A	199870	protein FAM76A isoform 1	0	8.755	7	2	5	2	1	341	38.4	9.1	13.35	2
134288896	NP_653265.3	FAM76B	143684	protein FAM76B	0	11.496	10	3	8	3	1	339	38.7	9.25	22.61	3
84000432	NP_659400.2	FAM91A1	157769	protein FAM91A1 isoform 1	0.002	5.233	2	1	4	1	1	838	93.9	6.39	14.64	1
14149934	NP_115607.1	FAM96A	84191	MIP18 family protein FAM96A isoform a precursor	0.003	4.342	6	1	5	1	1	160	18.3	4.88	12.45	1
7706343	NP_057146.1	FAM96B	51647	mitotic spindle-associated MMXD complex subunit MIP18	0	13.852	29	3	14	3	1	163	17.7	5.19	44.58	3
56699482	NP_056290.3	FAM98A	25940	protein FAM98A isoform 1	0	25.629	13	4	18	3	1	518	55.2	8.95	76.07	4
109452587	NP_775882.2	FAM98B	283742	protein FAM98B	0	46.104	19	7	39	6	1	433	45.5	8.69	160.87	7
116812620	NP_777565.3	FAM98C	147965	protein FAM98C	0.003	4.449	3	1	1	1	1	349	37.3	7.18	2.79	1
21361861	NP_149075.2	FANCD2	2177	Fanconi anemia group D2 protein isoform a	0	26.956	4	4	24	4	1	1471	166.4	6.24	59.64	4
164607124	NP_001106849.1	FANCI	55215	Fanconi anemia group I protein isoform 1	0	31.428	7	6	21	6	1	1328	149.2	6.74	75.66	6
767966644	XP_011518702.1	FAR1	84188	PREDICTED: fatty acyl-CoA reductase 1 isoform X1	0	5.954	4	2	2	2	1	518	59.8	9.23	3.47	2
767972141	XP_011519049.1	FAR2	55711	PREDICTED: fatty acyl-CoA reductase 2 isoform X1	0.002	4.886	2	1	2	1	1	535	61.7	9.48	5.61	1
4758340	NP_004452.1	FARSA	2193	phenylalanine--tRNA ligase alpha subunit	0	26.6	11	5	28	5	1	508	57.5	7.8	103.09	5
124028525	NP_005678.3	FARSB	10056	phenylalanine--tRNA ligase beta subunit	0	44.264	17	9	63	9	1	589	66.1	6.84	179.95	9
41872631	NP_004095.4	FASN	2194	fatty acid synthase	0	237.902	21	46	285	45	1	2511	273.3	6.44	938.96	46	Acetyl [N-Term]
45267832	NP_055744.2	FASTKD2	22868	FAST kinase domain-containing protein 2	0	15.192	6	3	7	3	1	710	81.4	8.05	22.03	3
4503659	NP_001988.1	FAU	2197	ubiquitin-like protein fubi and ribosomal protein S30 precursor	0	8.533	8	2	32	2	1	133	14.4	10.17	103.52	2
12056465	NP_001427.2	FBL	2091	rRNA 2'-O-methyltransferase fibrillarin	0	68.019	27	9	110	9	1	321	33.8	10.18	437.98	9
259013547	NP_001158507.1	FBLN2	2199	fibulin-2 isoform a precursor	0.013	2.382	1	1	1	1	1	1231	131.8	4.86	2.34	1
767979539	XP_011534658.1	FBLN5	10516	PREDICTED: fibulin-5 isoform X1	0.08	1.118	6	1	2	1	1	481	53.5	4.87	0	1
807045813	NP_001098549.2	FBRS	64319	probable fibrosin-1	0	15.539	6	3	7	3	1	980	103.7	9.51	24.25	3
1034608324	XP_016882401.1	FBXL12	54850	PREDICTED: F-box/LRR-repeat protein 12 isoform X1	0	5.966	5	1	3	1	1	343	37.9	8.68	10.1	1
22748931	NP_689654.1	FBXL14	144699	F-box/LRR-repeat protein 14	0.062	1.289	4	1	1	1	1	418	45.9	8.82	2.26	1
157426875	NP_079239.3	FBXL18	80028	F-box/LRR-repeat protein 18 isoform 2	0	5.342	3	2	6	2	1	718	78.9	8.27	8.3	2
16306584	NP_036290.1	FBXL3	26224	F-box/LRR-repeat protein 3	0.003	4.463	4	1	1	1	1	428	48.7	6.89	2.93	1
16306502	NP_296373.1	FBXO21	23014	F-box only protein 21 isoform 1	0.015	2.265	4	1	1	1	1	628	72.2	6.09	2.62	1
22547149	NP_671717.1	FBXO22	26263	F-box only protein 22 isoform a	0.006	3.38	3	1	1	1	1	403	44.5	7.03	1.7	1	Acetyl [N-Term]
530380688	XP_005268570.1	FBXO38	81545	PREDICTED: F-box only protein 38 isoform X1	0	8.265	3	2	3	2	1	1188	133.9	6.33	7.34	2
157743247	NP_001099043.1	FBXO45	200933	F-box/SPRY domain-containing protein 1	0.003	4.506	5	1	3	1	1	286	30.6	7.83	12.1	1
74229027	NP_036311.3	FBXO7	25793	F-box only protein 7 isoform 1	0	9.112	7	2	4	2	1	522	58.5	6.55	11.13	2
7705730	NP_057046.1	FCF1	51077	rRNA-processing protein FCF1 homolog isoform 1	0	7.694	11	2	4	2	1	198	23.4	9.7	11.08	2
154146262	NP_003881.2	FCGBP	8857	IgGFc-binding protein precursor	0.027	1.85	0	1	6	1	1	5405	571.6	5.34	0	1
567757574	NP_001274671.1	FDFT1	2222	squalene synthase isoform 1	0	28.293	19	7	32	7	1	417	48.1	6.54	96	7
4503685	NP_001995.1	FDPS	2224	farnesyl pyrophosphate synthase isoform a	0	71.119	20	8	80	8	1	419	48.2	6.15	336.56	8
731184190	NP_001244941.2	FDXR	2232	NADPH:adrenodoxin oxidoreductase, mitochondrial isoform 3 precursor	0	17.568	10	4	11	4	1	534	58.2	7.87	36.8	4
60499025	NP_001012533.1	FECH	2235	ferrochelatase, mitochondrial isoform a precursor	0	9.02	7	2	3	2	1	429	48.6	8.72	9.8	2
4758356	NP_004102.1	FEN1	2237	flap endonuclease 1	0	45.302	16	7	37	7	1	380	42.6	8.62	151.42	7
1034644193	XP_016864718.1	FER	2241	PREDICTED: tyrosine-protein kinase Fer isoform X1	0	5.815	3	2	2	2	1	837	96.2	7.03	5.31	2
767968868	XP_011543596.1	FERMT3	83706	PREDICTED: fermitin family homolog 3 isoform X1	0	38.764	18	8	23	8	1	667	75.9	6.98	82.52	8
530398506	XP_005271791.1	FEZ1	9638	PREDICTED: fasciculation and elongation protein zeta-1 isoform X1	0.07	1.206	5	1	4	1	1	392	45.1	4.3	11.21	1
134133265	NP_149077.2	FGD3	89846	FYVE, RhoGEF and PH domain-containing protein 3 isoform a	0	13.386	5	2	7	2	1	725	79.4	6.15	24.81	2
5901954	NP_008976.1	FGFR1OP	11116	FGFR1 oncogene partner isoform a	0	14.487	12	3	6	3	1	399	43	4.81	17.1	3
24308111	NP_056448.1	FGFR1OP2	26127	FGFR1 oncogene partner 2 isoform 1	0	6.671	8	2	3	2	1	253	29.4	6	7.34	2
112382244	NP_001036212.1	FGR	2268	tyrosine-protein kinase Fgr	0	16.176	11	5	30	4	1	529	59.4	5.59	83.76	5
19743875	NP_000134.2	FH	2271	fumarate hydratase, mitochondrial	0	42.511	19	8	42	8	1	510	54.6	8.76	146.66	8
578838645	XP_006724806.1	FHL1	2273	PREDICTED: four and a half LIM domains protein 1 isoform X1	0.002	4.714	4	1	2	1	1	339	37.9	9.04	7.28	1
38683849	NP_942600.1	FIBP	9158	acidic fibroblast growth factor intracellular-binding protein isoform a	0.009	2.854	2	1	2	1	1	364	41.9	6.48	4.34	1
7662034	NP_055660.1	FIG4	9896	polyphosphoinositide phosphatase	0.032	1.767	1	1	1	1	1	907	103.6	6.92	1.85	1
31742536	NP_071399.2	FIGNL1	63979	fidgetin-like protein 1 isoform 1	0	8.985	5	3	16	2	1	674	74	7.85	44.05	3
530376841	XP_005265826.1	FIP1L1	81608	PREDICTED: pre-mRNA 3'-end-processing factor FIP1 isoform X1	0	29.229	14	5	24	5	1	603	67.4	5.59	93.44	5
151108473	NP_057152.2	FIS1	51024	mitochondrial fission 1 protein	0.002	5.209	9	1	12	1	1	152	16.9	8.79	42.41	1
150010552	NP_056073.1	FKBP15	23307	FK506-binding protein 15	0	40.063	16	12	26	12	1	1219	133.5	5.2	72.37	12	Acetyl [N-Term]
17149836	NP_463460.1	FKBP1A	2280	peptidyl-prolyl cis-trans isomerase FKBP1A isoform a	0	20.998	22	2	22	2	1	108	11.9	8.16	78.94	2
1034586477	XP_016876581.1	FKBP3	2287	PREDICTED: peptidyl-prolyl cis-trans isomerase FKBP3 isoform X1	0	87.947	38	12	97	12	1	229	26	9.69	376.73	12
4503729	NP_002005.1	FKBP4	2288	peptidyl-prolyl cis-trans isomerase FKBP4	0	134.217	40	18	176	18	1	459	51.8	5.43	675.97	18
4758384	NP_004108.1	FKBP5	2289	peptidyl-prolyl cis-trans isomerase FKBP5 isoform 1	0	192.725	49	26	164	26	1	457	51.2	5.9	764.63	26	Acetyl [N-Term]
52630440	NP_036313.3	FKBP8	23770	peptidyl-prolyl cis-trans isomerase FKBP8 isoform 1	0	29.682	15	5	35	5	1	413	44.6	4.84	141.01	5
60097902	NP_002007.1	FLG	2312	filaggrin	0	16.185	2	2	6	2	1	4061	434.9	9.25	29.34	2
62122917	NP_001014364.1	FLG2	388698	filaggrin-2	0	6.408	1	2	5	2	1	2391	247.9	8.31	10.39	2
7110593	NP_002008.2	FLI1	2313	Friend leukemia integration 1 transcription factor isoform 1	0.004	3.963	3	1	3	1	1	452	51	7.06	9.52	1
4503743	NP_002009.1	FLII	2314	protein flightless-1 homolog isoform 1	0	60.441	10	12	62	12	1	1269	144.7	6.05	186.35	12	Acetyl [N-Term]
160420317	NP_001104026.1	FLNA	2316	filamin-A isoform 2	0	367.746	30	59	434	57	1	2647	280.6	6.06	1690.12	59
256222411	NP_001157789.1	FLNB	2317	filamin-B isoform 1	0	300.255	26	52	265	50	1	2633	281.5	5.71	938.06	52
530407539	XP_005255135.1	FLYWCH2	114984	PREDICTED: FLYWCH family member 2 isoform X1	0	32.838	54	5	30	5	1	140	14.6	8.46	103.26	5
33356148	NP_005883.2	FMNL1	752	formin-like protein 1	0	18.528	6	6	17	6	1	1100	121.8	5.72	49.41	6
4503765	NP_002015.1	FMR1	2332	fragile X mental retardation protein 1 isoform ISO1	0	11.514	4	4	12	3	1	632	71.1	7.42	29.08	4
530370025	XP_005246454.1	FN1	2335	PREDICTED: fibronectin isoform X1	0.002	4.697	0	1	3	1	1	2483	272.7	5.58	7.38	1
767956697	XP_011516701.1	FNBP1	23048	PREDICTED: formin-binding protein 1 isoform X1	0	35.942	16	9	31	9	1	650	75.1	6.11	103.73	9
971059218	NP_001305268.1	FNBP4	23360	formin-binding protein 4 isoform 1	0	9.349	2	2	5	2	1	1019	110.4	4.75	15.3	2
4503771	NP_002018.1	FNTA	2339	protein farnesyltransferase/geranylgeranyltransferase type-1 subunit alpha	0.004	4.255	5	2	11	2	1	379	44.4	5.08	21.87	2
10835059	NP_002019.1	FNTB	2342	protein farnesyltransferase subunit beta	0.003	4.63	5	1	1	1	1	437	48.7	5.82	3.73	1
1034670497	XP_016870345.1	FOCAD	54914	PREDICTED: focadhesin isoform X1	0	10.179	2	4	4	4	1	1828	203.1	6.57	6.67	4
82546824	NP_001032242.1	FOXK1	221937	forkhead box protein K1	0	15.701	7	4	18	3	1	733	75.4	9.32	81.54	4
31563338	NP_004505.2	FOXK2	3607	forkhead box protein K2	0	11.609	11	4	7	3	1	660	69	9.54	18.74	4
9257222	NP_002006.2	FOXO1	2308	forkhead box protein O1	0.013	2.389	2	1	2	1	1	655	69.6	6.77	1.86	1
348605233	NP_001231744.1	FOXP1	27086	forkhead box protein P1 isoform 8	0.022	1.983	1	1	2	1	1	679	76.3	7.43	4.97	1
767939219	XP_011512591.1	FOXP4	116113	PREDICTED: forkhead box protein P4 isoform X1	0.003	4.37	2	1	1	1	1	687	74.1	6.4	2.88	1
1034566391	XP_016871145.1	FRA10AC1	118924	PREDICTED: protein FRA10AC1 isoform X1	0.002	5	4	1	3	1	1	358	42.6	9.57	10.95	1
4758404	NP_004468.1	FRG1	2483	protein FRG1	0	25.929	28	7	26	5	1	258	29.2	9.01	80.15	7
530376637	XP_005248147.1	FRYL	285527	PREDICTED: protein furry homolog-like isoform X4	0.007	3.212	0	1	3	1	1	3028	341.1	5.59	6.28	1
56682959	NP_002023.2	FTH1	2495	ferritin heavy chain	0.005	3.539	12	2	4	2	1	183	21.2	5.55	6.25	2
767990503	XP_011521615.1	FTO	79068	PREDICTED: alpha-ketoglutarate-dependent dioxygenase FTO isoform X1	0	17.067	9	4	18	4	1	515	59.4	5.31	46.18	4
768033082	XP_011542195.1	FTSJ1	24140	PREDICTED: putative tRNA (cytidine(32)/guanosine(34)-2'-O)-methyltransferase isoform X1	0.002	4.891	5	1	3	1	1	337	36.9	6.3	9.61	1
194097365	NP_060117.3	FTSJ3	117246	pre-rRNA processing protein FTSJ3	0	66.009	23	14	54	14	1	847	96.5	8.4	191.95	14
1034563091	XP_016858233.1	FUBP1	8880	PREDICTED: far upstream element-binding protein 1 isoform X8	0	179.122	46	27	341	1	1	643	67.4	7.61	1225.45	27
17402900	NP_003893.2	FUBP1	8880	far upstream element-binding protein 1 isoform 2	0	175.843	46	27	334	1	1	644	67.5	7.61	1193.61	27
100816392	NP_003925.1	FUBP3	8939	far upstream element-binding protein 3	0	75.737	44	16	85	13	1	572	61.6	8.38	259.27	16
4826734	NP_004951.1	FUS	2521	RNA-binding protein FUS isoform 1	0	81.199	17	8	134	6	1	526	53.4	9.36	512.1	8
31077081	NP_000135.2	FXN	2395	frataxin, mitochondrial isoform 1 preproprotein	0.003	4.633	6	1	3	1	1	210	23.1	8.69	8.16	1
767927731	XP_005247870.2	FXR1	8087	PREDICTED: fragile X mental retardation syndrome-related protein 1 isoform X1	0	27.32	11	6	21	4	1	677	76.2	6.83	69.58	6
259013556	NP_004851.2	FXR2	9513	fragile X mental retardation syndrome-related protein 2	0	29.452	12	6	23	4	1	673	74.2	6.23	79.76	6
11125764	NP_067614.1	FXYD2	486	sodium/potassium-transporting ATPase subunit gamma isoform 2	0.004	3.939	17	1	3	1	1	64	7.4	8.84	7.68	1	Acetyl [N-Term]
767934347	XP_011512310.1	FYB	2533	PREDICTED: FYN-binding protein isoform X1	0	63.166	18	11	64	11	1	839	91.6	6.9	233.02	11
42716295	NP_115664.2	FYTTD1	84248	UAP56-interacting factor isoform 1	0.006	3.473	3	1	1	1	1	318	35.8	11.78	2.81	1
1034643208	XP_016864412.1	G3BP1	10146	PREDICTED: ras GTPase-activating protein-binding protein 1 isoform X1	0	80.139	33	11	186	10	1	466	52.1	5.52	610.12	11	Acetyl [N-Term]
530378493	XP_005263440.1	G3BP2	9908	PREDICTED: ras GTPase-activating protein-binding protein 2 isoform X1	0	48.015	19	6	42	5	1	482	54.1	5.55	194.81	6	Acetyl [N-Term]
109389365	NP_000393.4	G6PD	2539	glucose-6-phosphate 1-dehydrogenase isoform a	0	65.986	24	12	60	12	1	545	62.4	8.05	217.73	12
6005764	NP_009209.1	GABARAP	11337	gamma-aminobutyric acid receptor-associated protein	0	9.377	9	1	4	1	1	117	13.9	8.79	13.36	1
6005768	NP_009216.1	GABARAPL2	11345	gamma-aminobutyric acid receptor-associated protein-like 2	0	12.329	17	2	10	2	1	117	13.7	8.1	31.17	2
530418819	XP_005260995.1	GABPA	2551	PREDICTED: GA-binding protein alpha chain isoform X1	0	23.968	10	4	16	4	1	454	51.3	4.97	58.35	4
31543415	NP_443082.2	GADD45GIP1	90480	growth arrest and DNA damage-inducible proteins-interacting protein 1	0	10.693	19	3	23	3	1	222	25.4	10.02	61.95	3
767929039	XP_011511727.1	GAK	2580	PREDICTED: cyclin-G-associated kinase isoform X1	0	12.903	4	4	14	4	1	1355	147.7	6.02	38.8	4
4503895	NP_000145.1	GALK1	2584	galactokinase	0	17.102	8	3	18	3	1	392	42.2	6.46	60.18	3
530405634	XP_005254336.1	GALK2	2585	PREDICTED: N-acetylgalactosamine kinase isoform X1	0.036	1.684	2	1	3	1	1	462	50.8	6.77	1.75	1
20270355	NP_620156.1	GALM	130589	aldose 1-epimerase	0	10.591	10	2	5	2	1	342	37.7	6.65	18.26	2
530413734	XP_005258296.1	GALNT1	2589	PREDICTED: polypeptide N-acetylgalactosaminyltransferase 1 isoform X1	0	5.235	2	1	4	1	1	559	64.2	7.72	13.41	1
4758412	NP_004472.1	GALNT2	2590	polypeptide N-acetylgalactosaminyltransferase 2 precursor	0	15.61	6	3	16	3	1	571	64.7	8.35	49.84	3
157502212	NP_059119.2	GALNT7	51809	N-acetylgalactosaminyltransferase 7	0	9.138	4	2	5	2	1	657	75.3	7.11	16.97	2
22165416	NP_000146.2	GALT	2592	galactose-1-phosphate uridylyltransferase isoform 1	0.003	4.416	3	1	2	1	1	379	43.3	6.99	6.36	1
4503909	NP_000147.1	GAMT	2593	guanidinoacetate N-methyltransferase isoform a	0	12.605	13	2	11	2	1	236	26.3	6.14	34.88	2
38202257	NP_938148.1	GANAB	23193	neutral alpha-glucosidase AB isoform 2 precursor	0	126.038	23	21	168	21	1	944	106.8	6.14	516.36	21
576583524	NP_001276675.1	GAPDH	2597	glyceraldehyde-3-phosphate dehydrogenase isoform 1	0	142.275	42	13	687	13	1	335	36	8.46	2234.14	13
767956960	XP_011516802.1	GAPVD1	26130	PREDICTED: GTPase-activating protein and VPS9 domain-containing protein 1 isoform X1	0	28.84	5	5	24	5	1	1487	166.1	5.21	74.65	5
15011916	NP_127460.1	GAR1	54433	H/ACA ribonucleoprotein complex subunit 1	0	15.141	29	5	10	5	1	217	22.3	10.92	16.16	5
943350815	NP_001303701.1	GARS	2617	glycine--tRNA ligase isoform 2	0	114.248	25	19	162	1	1	685	77.5	6.24	576.69	19	Acetyl [N-Term]
116805340	NP_002038.2	GARS	2617	glycine--tRNA ligase isoform 1 precursor	0	114.166	23	19	162	1	1	739	83.1	7.03	574.23	19
578836508	XP_006724053.1	GART	2618	PREDICTED: trifunctional purine biosynthetic protein adenosine-3 isoform X1	0	124.931	30	24	115	24	1	1010	107.7	6.7	439.05	24
50541959	NP_001002295.1	GATA3	2625	trans-acting T-cell-specific transcription factor GATA-3 isoform 1	0.003	4.521	2	1	4	1	1	444	48	9.36	10.97	1	Acetyl [N-Term]
1034608313	XP_016882396.1	GATAD2A	54815	PREDICTED: transcriptional repressor p66-alpha isoform X2	0	75.026	26	14	81	12	1	704	75.9	9.92	266.02	14
530365128	XP_005245421.1	GATAD2B	57459	PREDICTED: transcriptional repressor p66-beta isoform X1	0	59.535	30	12	53	10	1	593	65.2	9.7	178.19	12
50978624	NP_789788.1	GATC	283459	glutamyl-tRNA(Gln) amidotransferase subunit C, mitochondrial	0.003	4.406	13	1	1	1	1	136	15.1	5.05	3.24	1
4503937	NP_001474.1	GBAS	2631	protein NipSnap homolog 2 isoform 1	0	13.792	14	4	18	3	1	286	33.7	9.36	46.28	4
189458812	NP_000149.3	GBE1	2632	1,4-alpha-glucan-branching enzyme	0	51.691	15	8	54	8	1	702	80.4	6.32	159.64	8
578819967	XP_006718110.1	GBF1	8729	PREDICTED: Golgi-specific brefeldin A-resistance guanine nucleotide exchange factor 1 isoform X1	0	13.7	3	3	6	3	1	1893	210.2	5.78	30.14	3
578804016	XP_006712461.1	GCA	25801	PREDICTED: grancalcin isoform X1	0.04	1.612	3	1	2	1	1	259	29.1	5.14	1.63	1
1034628541	XP_016884163.1	GCAT	23464	PREDICTED: 2-amino-3-ketobutyrate coenzyme A ligase, mitochondrial isoform X1	0.004	4.237	2	1	3	1	1	521	56.3	7.77	4.92	1
22208850	NP_078799.2	GCC1	79571	GRIP and coiled-coil domain-containing protein 1	0	7.182	2	1	3	1	1	775	87.8	5.45	17.92	1
4503943	NP_000150.1	GCDH	2639	glutaryl-CoA dehydrogenase, mitochondrial isoform a precursor	0	12.608	14	4	7	4	1	438	48.1	8.06	14.82	4
4885257	NP_005249.1	GCHFR	2644	GTP cyclohydrolase 1 feedback regulatory protein	0	13.491	49	2	10	2	1	84	9.7	6.54	48.3	2
4557625	NP_001489.1	GCLC	2729	glutamate--cysteine ligase catalytic subunit isoform a	0	8.633	5	2	9	2	1	637	72.7	6.09	30.34	2
1034557812	XP_016856545.1	GCLM	2730	PREDICTED: glutamate--cysteine ligase regulatory subunit isoform X1	0	16.188	16	3	10	3	1	275	30.4	5.74	43.13	3
54607053	NP_006827.1	GCN1	10985	eIF-2-alpha kinase activator GCN1	0	142.655	15	33	132	33	1	2671	292.5	7.43	391.64	33
553726985	NP_001272829.1	GCOM1	145781	GRINL1A combined protein isoform 3	0	5.501	4	2	2	2	1	765	87.8	6.04	1.94	2
49574537	NP_004474.2	GCSH	2653	glycine cleavage system H protein, mitochondrial precursor	0	8.445	17	2	15	2	1	173	18.9	4.88	30.75	2
767951827	XP_011515853.1	GDAP1	54332	PREDICTED: ganglioside-induced differentiation-associated protein 1 isoform X1	0	5.572	3	1	2	1	1	456	52.2	9.69	7.88	1
4503971	NP_001484.1	GDI1	2664	rab GDP dissociation inhibitor alpha	0	65.028	27	12	87	7	1	447	50.6	5.14	274.76	12
6598323	NP_001485.2	GDI2	2665	rab GDP dissociation inhibitor beta isoform 1	0	135.92	43	20	230	15	1	445	50.6	6.47	790.61	20
4506961	NP_003607.1	GEMIN2	8487	gem-associated protein 2 isoform alpha	0.002	4.939	4	1	1	1	1	280	31.6	5.58	4.4	1
1034599964	XP_016880198.1	GEMIN4	50628	PREDICTED: gem-associated protein 4 isoform X1	0.002	4.692	2	2	4	2	1	1062	120.4	6.04	10.85	2
157739942	NP_056280.2	GEMIN5	25929	gem-associated protein 5 isoform 1	0	53.963	10	9	38	9	1	1508	168.5	6.62	134.88	9
41393577	NP_079051.9	GEMIN6	79833	gem-associated protein 6	0	9.285	8	1	8	1	1	167	18.8	5.12	27.24	1
55953072	NP_001007270.1	GEMIN7	79760	gem-associated protein 7	0.004	3.807	10	1	4	1	1	131	14.5	7.4	10.64	1	Acetyl [N-Term]
38570062	NP_057033.2	GET4	51608	Golgi to ER traffic protein 4 homolog	0	18.679	9	2	14	2	1	327	36.5	5.41	78.15	2
1034599131	XP_016879940.1	GFAP	2670	PREDICTED: glial fibrillary acidic protein isoform X1	0.002	4.696	4	2	2	1	1	472	54.2	6.19	5.18	2
71037377	NP_005254.2	GFI1	2672	zinc finger protein Gfi-1	0.002	4.81	3	1	2	1	1	422	45.3	9	6.6	1
815890950	NP_001295093.1	GFM1	85476	elongation factor G, mitochondrial isoform 1	0	41.192	11	7	35	7	1	770	85.8	7.18	118.12	7
526479814	NP_001268231.1	GFM2	84340	ribosome-releasing factor 2, mitochondrial isoform 4	0	9.883	6	3	5	3	1	811	90.4	6.58	16.7	3
1034613074	XP_016859290.1	GFPT1	2673	PREDICTED: glutamine--fructose-6-phosphate aminotransferase [isomerizing] 1 isoform X1	0	95.529	25	14	89	14	1	724	81.5	7.66	334.65	14
530419903	XP_005261574.1	GGA1	26088	PREDICTED: ADP-ribosylation factor-binding protein GGA1 isoform X1	0	10.067	7	3	9	2	1	656	72.2	5.35	20.68	3
1034598898	XP_016879874.1	GGA3	23163	PREDICTED: ADP-ribosylation factor-binding protein GGA3 isoform X1	0.002	5.05	2	2	4	1	1	733	79.2	6.11	8.62	2
13129018	NP_076956.1	GGCT	79017	gamma-glutamylcyclotransferase isoform 1	0	20.957	22	4	26	4	1	188	21	5.14	91.63	4
4503987	NP_003869.1	GGH	8836	gamma-glutamyl hydrolase precursor	0	10.214	4	1	8	1	1	318	35.9	7.11	29.44	1
83700220	NP_001032354.1	GGPS1	9453	geranylgeranyl pyrophosphate synthase	0	9.374	10	3	3	3	1	300	34.8	6.14	7.58	3	Acetyl [N-Term]
14210490	NP_115873.1	GHDC	84514	GH3 domain-containing protein isoform 1 precursor	0	13.73	7	3	6	3	1	530	57.5	7.88	18.99	3
118200356	NP_055209.2	GHITM	27069	growth hormone-inducible transmembrane protein	0	5.458	3	1	4	1	1	345	37.2	9.94	9.83	1
23111007	NP_076957.3	GID4	79018	glucose-induced degradation protein 4 homolog	0.003	4.336	3	1	2	1	1	300	33.5	9.16	4.65	1
42476299	NP_056390.2	GIGYF2	26058	PERQ amino acid-rich with GYF domain-containing protein 2 isoform b	0	46.096	10	10	22	10	1	1299	150	5.54	73.75	10
28416431	NP_056475.1	GIMAP2	26157	GTPase IMAP family member 2	0.012	2.539	3	1	1	1	1	337	38	8.24	0	1
126116594	NP_066545.3	GINS1	9837	DNA replication complex GINS protein PSF1	0	15.334	24	4	13	4	1	196	23	7.39	42.08	4
7706367	NP_057179.1	GINS2	51659	DNA replication complex GINS protein PSF2	0	7.842	17	2	17	2	1	185	21.4	5.44	34.67	2
187169264	NP_001119601.1	GINS3	64785	DNA replication complex GINS protein PSF3 isoform a	0	19.811	16	3	15	3	1	255	28.8	5.24	54.32	3
530388094	XP_005273716.1	GINS4	84296	PREDICTED: DNA replication complex GINS protein SLD5 isoform X1	0	21.25	24	4	27	4	1	223	26	4.98	102.71	4
767994460	XP_011522986.1	GIT1	28964	PREDICTED: ARF GTPase-activating protein GIT1 isoform X1	0	28.295	11	5	21	5	1	777	86.2	7.03	76.81	5
17149830	NP_476510.1	GIT2	9815	ARF GTPase-activating protein GIT2 isoform 1	0	30.204	11	5	14	5	1	759	84.5	7.23	52.28	5
768032240	XP_011543793.1	GK	2710	PREDICTED: glycerol kinase isoform X1	0.082	1.1	2	1	1	1	1	587	63.6	6.54	0	1
530391632	XP_005252298.1	GKAP1	80318	PREDICTED: G kinase-anchoring protein 1 isoform X1	0.008	3.079	3	1	1	1	1	366	42.1	8.82	1.75	1
4504009	NP_000160.1	GLA	2717	alpha-galactosidase A precursor	0	10.448	9	4	4	4	1	429	48.7	5.6	7.21	4
55742678	NP_612435.1	GLCCI1	113263	glucocorticoid-induced transcript 1 protein	0	9.639	5	2	3	2	1	547	58	9.44	8.71	2
767957083	XP_011516851.1	GLE1	2733	PREDICTED: nucleoporin GLE1 isoform X1	0.004	4.279	3	1	1	1	1	710	80.5	6.8	2.67	1
54633312	NP_036333.2	GLG1	2734	Golgi apparatus protein 1 isoform 1 precursor	0	60.445	12	12	36	12	1	1203	137.1	6.9	120.23	12
558757349	NP_001273942.1	GLIPR2	152007	Golgi-associated plant pathogenesis-related protein 1 isoform e	0	18.514	33	4	6	4	1	169	18.9	9.61	22.77	4
1034554963	XP_016855626.1	GLMN	11146	PREDICTED: glomulin isoform X1	0	14.324	7	3	7	3	1	627	71.9	5.35	22	3
118402586	NP_006699.2	GLO1	2739	lactoylglutathione lyase	0	30.071	36	8	56	8	1	184	20.8	5.31	166.1	8
217330598	NP_057164.3	GLOD4	51031	glyoxalase domain-containing protein 4	0	46.538	37	10	69	10	1	298	33.2	5.6	222.49	10
169646776	NP_001112362.1	GLRX	2745	glutaredoxin-1	0.004	4.226	10	1	2	1	1	106	11.8	8.09	6.86	1
315467838	NP_001186797.1	GLRX3	10539	glutaredoxin-3 isoform 1	0	32.355	25	7	46	7	1	335	37.4	5.39	128.88	7
42516576	NP_057501.2	GLRX5	51218	glutaredoxin-related protein 5, mitochondrial precursor	0	17.563	21	2	18	2	1	157	16.6	6.79	62.57	2
373251164	NP_001243239.1	GLS	2744	glutaminase kidney isoform, mitochondrial isoform 2	0	21.804	5	3	11	2	1	598	65.4	7.88	41.18	3
156104878	NP_055720.3	GLS	2744	glutaminase kidney isoform, mitochondrial isoform 1 precursor	0	9.393	3	2	7	1	1	669	73.4	7.77	20.89	2
239787829	NP_056525.2	GLTSCR2	29997	glioma tumor suppressor candidate region gene 2 protein	0.008	3.074	2	1	3	1	1	478	54.4	10.32	7.19	1
4885281	NP_005262.1	GLUD1	2746	glutamate dehydrogenase 1, mitochondrial isoform a precursor	0	100.434	40	17	115	17	1	558	61.4	7.8	414.95	17
74271837	NP_001028216.1	GLUL	2752	glutamine synthetase	0.004	3.764	4	1	6	1	1	373	42	6.89	16.93	1
1034596327	XP_016879275.1	GLYR1	84656	PREDICTED: putative oxidoreductase GLYR1 isoform X1	0	22.301	7	4	16	4	1	574	62.8	9.35	55.16	4
4504031	NP_001491.1	GMDS	2762	GDP-mannose 4,6 dehydratase isoform 1	0	25.724	20	6	28	6	1	372	41.9	7.31	86.45	6
6912568	NP_036516.1	GMEB2	26205	glucocorticoid modulatory element-binding protein 2	0	9.776	5	2	4	2	1	530	56.4	5.6	12.95	2
4758442	NP_004115.1	GMFB	2764	glia maturation factor beta	0	20.449	24	5	15	4	1	142	16.7	5.29	48.53	5
4758440	NP_004868.1	GMFG	9535	glia maturation factor gamma isoform 1	0	20.626	34	5	29	4	1	142	16.8	5.26	100.42	5
91208437	NP_057657.2	GMIP	51291	GEM-interacting protein isoform 1	0	10.688	4	3	6	3	1	970	106.6	5.72	16.32	3
767917751	XP_011509334.1	GMPPA	29926	PREDICTED: mannose-1-phosphate guanyltransferase alpha isoform X4	0	20.087	14	5	13	5	1	425	46.8	7.21	36.89	5
11761619	NP_037466.2	GMPPB	29925	mannose-1-phosphate guanyltransferase beta isoform 1	0	26.512	16	4	19	4	1	387	42.6	6.46	74.29	4
545687487	NP_001269951.1	GMPR2	51292	GMP reductase 2 isoform 4	0	25.201	13	5	18	5	1	427	46.9	8.51	72.53	5
767927897	XP_011511565.1	GMPS	8833	PREDICTED: GMP synthase [glutamine-hydrolyzing] isoform X1	0	92.499	20	17	112	17	1	699	77.4	6.98	374.48	17
24111250	NP_006563.2	GNA13	10672	guanine nucleotide-binding protein subunit alpha-13 isoform 1	0	19.133	11	4	19	3	1	377	44	8	45.13	4
597709771	NP_002059.3	GNA15	2769	guanine nucleotide-binding protein subunit alpha-15	0	6.151	4	1	6	1	1	374	43.5	8.46	24.48	1
4504041	NP_002061.1	GNAI2	2771	guanine nucleotide-binding protein G(i) subunit alpha-2 isoform 1	0	71.663	32	10	62	4	1	355	40.4	5.54	224.94	10
5729850	NP_006487.1	GNAI3	2773	guanine nucleotide-binding protein G(k) subunit alpha	0	60.991	25	9	53	3	1	354	40.5	5.69	183.3	9
40254462	NP_002063.2	GNAQ	2776	guanine nucleotide-binding protein G(q) subunit alpha	0	6.029	8	2	3	2	1	359	42.1	5.68	7.83	2
1034625016	XP_016883301.1	GNAS	2778	PREDICTED: protein GNAS isoform X1	0	37.651	9	8	57	7	1	1038	111	5.03	172.09	8
1034557822	XP_016856549.1	GNB1	2782	PREDICTED: guanine nucleotide-binding protein G(I)/G(S)/G(T) subunit beta-1 isoform X1	0	50.814	28	9	50	4	1	340	37.4	6	161.05	9
17402902	NP_443730.1	GNB1L	54584	guanine nucleotide-binding protein subunit beta-like protein 1	0	10.067	13	3	11	3	1	327	35.6	7.97	24.74	3
20357529	NP_005264.2	GNB2	2783	guanine nucleotide-binding protein G(I)/G(S)/G(T) subunit beta-2	0	56.641	28	9	60	3	1	340	37.3	6	196.89	9
11055998	NP_067642.1	GNB4	59345	guanine nucleotide-binding protein subunit beta-4	0	26.84	16	5	39	1	1	340	37.5	6	128.05	5
190014632	NP_001121699.1	GNE	10020	bifunctional UDP-N-acetylglucosamine 2-epimerase/N-acetylmannosamine kinase isoform 1	0	11.245	5	3	8	3	1	753	83	6.93	22.68	3
4885287	NP_005265.1	GNG5	2787	guanine nucleotide-binding protein G(I)/G(S)/G(O) subunit gamma-5 precursor	0	5.783	26	2	16	2	1	68	7.3	9.85	46.07	2
530381804	XP_005249072.1	GNL1	2794	PREDICTED: guanine nucleotide-binding protein-like 1 isoform X1	0	36.946	20	10	45	10	1	607	68.6	5.8	113.74	10
1021312148	NP_001310552.1	GNL2	29889	nucleolar GTP-binding protein 2 isoform 2	0	12.36	5	4	7	4	1	799	91.2	9.25	18.62	4
45593130	NP_055181.3	GNL3	26354	guanine nucleotide-binding protein-like 3 isoform 1	0	17.344	9	5	12	5	1	549	62	9.16	31.57	5
9506611	NP_061940.1	GNL3L	54552	guanine nucleotide-binding protein-like 3-like protein	0	32.305	16	7	15	7	1	582	65.5	8.44	40.31	7
7657134	NP_055051.1	GNPAT	8443	dihydroxyacetone phosphate acyltransferase isoform 1	0.033	1.728	1	1	1	1	1	680	77.1	6.57	2.88	1
530380347	XP_005268405.1	GNPDA1	10007	PREDICTED: glucosamine-6-phosphate isomerase 1 isoform X1	0	17.224	14	4	15	4	1	318	36.1	7.61	49.31	4
578826075	XP_006720301.1	GNPNAT1	64841	PREDICTED: glucosamine 6-phosphate N-acetyltransferase isoform X1	0.003	4.388	10	1	1	1	1	184	20.7	7.99	2.94	1
4504061	NP_002067.1	GNS	2799	N-acetylglucosamine-6-sulfatase precursor	0	20.704	10	5	12	5	1	552	62	8.31	28.12	5
530390995	XP_005251987.1	GOLGA2	2801	PREDICTED: golgin subfamily A member 2 isoform X1	0	7.774	2	2	4	2	1	1029	116	5.05	12.15	2
578824668	XP_006719799.1	GOLGA3	2802	PREDICTED: golgin subfamily A member 3 isoform X1	0	50.366	10	9	25	9	1	1498	167.3	5.44	85.27	9	Acetyl [N-Term]
530372318	XP_005265126.1	GOLGA4	2803	PREDICTED: golgin subfamily A member 4 isoform X1	0.03	1.813	1	1	1	1	1	2285	266.7	5.39	2.53	1
374532817	NP_001243415.1	GOLGB1	2804	golgin subfamily B member 1 isoform 1	0	21.682	3	5	7	5	1	3269	376.9	5	24.21	5
530374430	XP_005247421.1	GOLIM4	27333	PREDICTED: Golgi integral membrane protein 4 isoform X1	0	19.741	6	3	9	3	1	697	81.9	4.77	25.79	3
29550850	NP_808800.1	GOLM1	51280	Golgi membrane protein 1	0.004	4.013	3	1	2	1	1	401	45.3	4.97	6.53	1
11545859	NP_071413.1	GOLPH3	64083	Golgi phosphoprotein 3	0	5.445	5	1	2	1	1	298	33.8	6.44	8.15	1
578801211	XP_006711491.1	GOLPH3L	55204	PREDICTED: Golgi phosphoprotein 3-like isoform X1	0	5.463	5	1	2	1	1	299	34.4	6.98	7.48	1
9966877	NP_065132.1	GOPC	57120	Golgi-associated PDZ and coiled-coil motif-containing protein isoform a	0.008	2.971	2	1	1	1	1	462	50.5	5.92	2.05	1
29826294	NP_056345.3	GORASP2	26003	Golgi reassembly-stacking protein 2 isoform 1	0	12.298	11	4	12	4	1	452	47.1	4.82	36.18	4
530411221	XP_005258127.1	GOSR1	9527	PREDICTED: Golgi SNAP receptor complex member 1 isoform X1	0.002	5.03	4	1	3	1	1	300	34.5	9.89	2.85	1
1007372548	NP_001308062.1	GOSR2	9570	Golgi SNAP receptor complex member 2 isoform D	0	7.388	8	2	11	2	1	257	29.8	7.17	33.75	2	Acetyl [N-Term]
4504067	NP_002070.1	GOT1	2805	aspartate aminotransferase, cytoplasmic	0	50.743	31	11	50	11	1	413	46.2	7.01	145.25	11
73486658	NP_002071.2	GOT2	2806	aspartate aminotransferase, mitochondrial isoform 1 precursor	0	62.854	30	13	73	13	1	430	47.5	9.01	261.02	13
4504079	NP_003792.1	GPAA1	8733	glycosylphosphatidylinositol anchor attachment 1 protein	0.003	4.406	2	1	5	1	1	621	67.6	8.06	15.49	1
530402482	XP_005266501.1	GPALPP1	55425	PREDICTED: GPALPP motifs-containing protein 1 isoform X1	0	22.406	17	6	15	6	1	340	38.1	5.41	40.43	6
21361684	NP_060495.2	GPATCH1	55094	G patch domain-containing protein 1	0.012	2.479	2	1	1	1	1	931	103.3	7.05	2.15	1
511772977	NP_777591.3	GPATCH11	253635	G patch domain-containing protein 11 isoform 1	0.008	3.179	3	1	2	1	1	285	33.3	5.86	4.5	1
33356550	NP_872620.1	GPATCH4	54865	G patch domain-containing protein 4 isoform 2	0	16.232	13	4	22	4	1	370	42	9.31	27.65	4	Acetyl [N-Term]
767994135	XP_011522859.1	GPATCH8	23131	PREDICTED: G patch domain-containing protein 8 isoform X1	0	30.595	4	5	13	5	1	1531	167.3	8.54	51.98	5
578810503	XP_006714736.1	GPBP1	65056	PREDICTED: vasculin isoform X1	0.069	1.222	2	1	1	1	1	500	56.2	7.71	0	1
91106714	NP_001035055.1	GPER1	2852	G-protein coupled estrogen receptor 1	0.024	1.954	2	1	10	1	1	375	42.2	8.29	8.58	1	Acetyl [N-Term]
767979518	XP_011534644.1	GPHN	10243	PREDICTED: gephyrin isoform X3	0	11.465	5	3	7	3	1	812	88.3	5.94	12.06	3
768008086	XP_011525056.1	GPI	2821	PREDICTED: glucose-6-phosphate isomerase isoform X1	0	110.976	26	17	149	17	1	597	67.2	8.97	515.55	17
1034673992	XP_016884904.1	GPKOW	27238	PREDICTED: G patch domain and KOW motifs-containing protein isoform X1	0	31.628	18	5	14	5	1	491	53.9	6.9	52.83	5
223005897	NP_009197.2	GPN1	11321	GPN-loop GTPase 1 isoform a	0	14.877	10	3	7	3	1	388	43.3	5.19	22.95	3
1034579867	XP_005253953.3	GPN3	51184	PREDICTED: GPN-loop GTPase 3 isoform X1	0	12.076	6	2	8	2	1	457	51.8	6.19	36.91	2
530413484	XP_005256407.1	GPS1	2873	PREDICTED: COP9 signalosome complex subunit 1 isoform X2	0	36.608	16	7	24	7	1	585	65	6.28	81.99	7
4758472	NP_004480.1	GPS2	2874	G protein pathway suppressor 2	0.004	3.787	3	1	3	1	1	327	36.7	9.52	6.69	1
41406084	NP_000572.2	GPX1	2876	glutathione peroxidase 1 isoform 1	0.004	4.152	4	1	1	1	1	203	22.1	6.55	2.76	1
90903240	NP_001034937.1	GPX4	2879	phospholipid hydroperoxide glutathione peroxidase, mitochondrial isoform C precursor	0.003	4.655	5	1	2	1	1	234	27.1	10.07	4.78	1
768010208	XP_011525455.1	GRAMD1A	57655	PREDICTED: GRAM domain-containing protein 1A isoform X4	0.004	4.295	2	1	3	1	1	811	90.1	6.62	7.13	1
625180309	NP_001278754.1	GRAP2	9402	GRB2-related adapter protein 2 isoform 1	0	9.192	7	2	4	2	1	330	37.9	6.95	12.96	2
4504111	NP_002077.1	GRB2	2885	growth factor receptor-bound protein 2 isoform 1	0	32.246	30	7	32	7	1	217	25.2	6.32	96.7	7
6912396	NP_036335.1	GRHPR	9380	glyoxylate reductase/hydroxypyruvate reductase	0	16.565	16	3	6	3	1	328	35.6	7.39	28.11	3
768033269	XP_011542237.1	GRIPAP1	56850	PREDICTED: GRIP1-associated protein 1 isoform X1	0	25.926	12	7	10	7	1	851	97.1	5.12	27.67	7
51896035	NP_002073.2	GRK6	2870	G protein-coupled receptor kinase 6 isoform B	0.003	4.316	2	1	1	1	1	589	67.2	8.5	3.18	1
530411988	XP_005257310.1	GRN	2896	PREDICTED: granulins isoform X1	0	9.574	4	2	4	2	1	593	63.5	6.83	12.1	2
24308295	NP_079472.1	GRPEL1	80273	grpE protein homolog 1, mitochondrial precursor	0	26.69	29	4	20	4	1	217	24.3	8.12	95.13	4
530376963	XP_005265738.1	GRSF1	2926	PREDICTED: G-rich sequence factor 1 isoform X1	0	17.048	8	4	19	4	1	561	61.5	7.5	59.74	4
237820620	NP_113673.3	GRWD1	83743	glutamate-rich WD repeat-containing protein 1	0	16.946	13	4	8	4	1	446	49.4	4.92	25.23	4
767953617	XP_011515603.1	GSDMD	79792	PREDICTED: gasdermin-D isoform X1	0	7.479	4	2	5	2	1	695	74.8	6.52	11.14	2
1034594073	XP_005255916.3	GSE1	23199	PREDICTED: genetic suppressor element 1 isoform X2	0	18.431	3	3	8	3	1	1925	212	7.24	26.16	3
49574532	NP_063937.2	GSK3A	2931	glycogen synthase kinase-3 alpha	0	19.873	14	3	16	2	1	483	50.9	8.75	51.87	3
21361340	NP_002084.2	GSK3B	2932	glycogen synthase kinase-3 beta isoform 1	0	19.597	15	4	25	3	1	433	48	8.78	102.79	4
4504165	NP_000168.1	GSN	2934	gelsolin isoform a precursor	0.082	1.1	1	1	2	1	1	782	85.6	6.28	0	1
194018520	NP_002085.2	GSPT1	2935	eukaryotic peptide chain release factor GTP-binding subunit ERF3A isoform 1	0	59.695	32	14	64	14	1	637	68.6	5.33	193.96	14	Acetyl [N-Term]
50301238	NP_000628.2	GSR	2936	glutathione reductase, mitochondrial isoform 1 precursor	0	51.459	18	7	53	7	1	522	56.2	8.5	200.58	7
1017029493	NP_001309423.1	GSS	2937	glutathione synthetase	0	38.082	22	10	38	10	1	474	52.4	5.92	107.53	10
7705704	NP_057001.1	GSTK1	373156	glutathione S-transferase kappa 1 isoform a	0	24.135	31	6	14	6	1	226	25.5	8.41	38.63	6
4758484	NP_004823.1	GSTO1	9446	glutathione S-transferase omega-1 isoform 1	0	24.534	18	5	42	5	1	241	27.5	6.6	123.95	5
4504183	NP_000843.1	GSTP1	2950	glutathione S-transferase P	0	31.568	27	4	72	1	1	210	23.3	5.64	262.52	4
4758486	NP_004483.1	GTF2A2	2958	transcription initiation factor IIA subunit 2	0	7.848	22	2	6	2	1	109	12.4	6.62	20.28	2
4504193	NP_001505.1	GTF2B	2959	transcription initiation factor IIB	0	22.885	15	4	9	4	1	316	34.8	8.35	29.26	4
767926533	XP_011511047.1	GTF2E1	2960	PREDICTED: general transcription factor IIE subunit 1 isoform X1	0	5.457	4	1	1	1	1	439	49.4	4.82	5.9	1
156104891	NP_002087.2	GTF2F1	2962	general transcription factor IIF subunit 1	0	63.481	16	10	46	10	1	517	58.2	7.49	174.54	10
767977611	XP_011533354.1	GTF2F2	2963	PREDICTED: general transcription factor IIF subunit 2 isoform X1	0	26.561	18	5	18	5	1	275	30.9	9.29	57.68	5
1034644742	XP_016864892.1	GTF2H2	2966	PREDICTED: general transcription factor IIH subunit 2 isoform X1	0.008	2.968	2	1	1	1	1	395	44.4	6.76	1.93	1
19923732	NP_001507.2	GTF2H3	2967	general transcription factor IIH subunit 3 isoform a	0	9.356	10	2	3	2	1	308	34.4	7.02	10.35	2
14670350	NP_127492.1	GTF2I	2969	general transcription factor II-I isoform 1	0	103.75	23	22	118	22	1	998	112.3	6.39	379.15	22
166063995	NP_002088.2	GTF3A	2971	transcription factor IIIA	0	7.314	6	2	8	2	1	365	41.5	9.14	21.92	2
101943240	NP_001511.2	GTF3C1	2975	general transcription factor 3C polypeptide 1 isoform 1	0	24.43	4	7	17	7	1	2109	238.7	7.3	58.31	7
767914409	XP_011531103.1	GTF3C2	2976	PREDICTED: general transcription factor 3C polypeptide 2 isoform X1	0	21.535	7	4	17	4	1	1026	113.4	8.53	58.15	4
6912398	NP_036218.1	GTF3C3	9330	general transcription factor 3C polypeptide 3 isoform 1	0	18.025	7	4	7	4	1	886	101.2	5.07	23.66	4
156119605	NP_036336.2	GTF3C4	9329	general transcription factor 3C polypeptide 4	0	63.482	21	12	32	12	1	822	91.9	6.65	112.76	12	Acetyl [N-Term]
530427257	XP_005272291.1	GTF3C5	9328	PREDICTED: general transcription factor 3C polypeptide 5 isoform X1	0	13.08	7	3	12	3	1	537	59.7	9.48	36.06	3
1034629940	XP_016884588.1	GTPBP1	9567	PREDICTED: GTP-binding protein 1 isoform X1	0	30.845	10	5	23	5	1	734	79.6	8.85	79.95	5
45593140	NP_061969.3	GTPBP2	54676	GTP-binding protein 2 isoform a	0.003	4.572	2	1	1	1	1	602	65.7	8.05	2.06	1
193082988	NP_598399.2	GTPBP3	84705	tRNA modification GTPase GTPBP3, mitochondrial isoform IV	0.004	3.928	3	1	2	1	1	524	55.5	6.83	5.49	1
55953087	NP_036473.2	GTPBP4	23560	nucleolar GTP-binding protein 1	0	69.36	22	13	61	13	1	634	73.9	9.5	215.44	13
604723316	NP_036359.3	GTPBP6	8225	putative GTP-binding protein 6	0	5.929	4	2	4	2	1	516	56.9	9.42	9.46	2
253970412	NP_057510.4	GTSE1	51512	G2 and S phase-expressed protein 1	0.006	3.388	1	1	2	1	1	739	78.4	9.29	4.71	1
157426893	NP_068746.2	GUF1	60558	translation factor GUF1, mitochondrial	0.003	4.485	3	1	3	1	1	669	74.3	8.59	11.52	1
530366145	XP_005273161.1	GUK1	2987	PREDICTED: guanylate kinase isoform X2	0	18.118	12	4	18	4	1	263	28.6	6.07	58.85	4
578804461	XP_006712645.1	GULP1	51454	PREDICTED: PTB domain-containing engulfment adapter protein 1 isoform X1	0.062	1.277	3	1	1	1	1	379	42.7	7.97	0	1
268834192	NP_000172.2	GUSB	2990	beta-glucuronidase isoform 1 precursor	0	12.06	7	4	7	4	1	651	74.7	7.02	12.02	4
20127457	NP_004121.2	GYG1	2992	glycogenin-1 isoform 1	0	14.788	11	3	10	3	1	350	39.4	5.53	41.98	3
31542868	NP_002094.2	GYS1	2997	glycogen [starch] synthase, muscle isoform 1	0.008	2.934	1	1	5	1	1	737	83.7	6.18	7.5	1
11968150	NP_071927.1	GZF1	64412	GDNF-inducible zinc finger protein 1 isoform a	0.009	2.792	1	1	1	1	1	711	80.4	7.87	2.08	1
5174449	NP_006017.1	H1FX	8971	histone H1x	0	20.647	17	3	13	3	1	213	22.5	10.76	46.81	3
93141018	NP_613258.2	H2AFY	9555	core histone macro-H2A.1 isoform 3	0	58.822	39	11	76	11	1	372	39.6	9.79	277.6	11
4504255	NP_002097.1	H2AFZ	3015	histone H2A.Z	0	22.723	31	4	148	2	1	128	13.5	10.58	428.19	4
117168248	NP_057479.2	HACD3	51495	very-long-chain (3R)-3-hydroxyacyl-CoA dehydratase 3	0	15.835	8	3	16	3	1	362	43.1	8.94	49.28	3	Acetyl [N-Term]
296179429	NP_005318.3	HADH	3033	hydroxyacyl-coenzyme A dehydrogenase, mitochondrial isoform 2 precursor	0	78.597	40	11	96	1	1	314	34.3	8.85	320.48	11
530377639	XP_005263029.1	HADH	3033	PREDICTED: hydroxyacyl-coenzyme A dehydrogenase, mitochondrial isoform X1	0	78.438	40	11	100	1	1	318	35.2	7.21	333.42	11
20127408	NP_000173.2	HADHA	3030	trifunctional enzyme subunit alpha, mitochondrial precursor	0	62.414	22	13	56	13	1	763	82.9	9.04	175.2	13
1034613472	XP_016859428.1	HADHB	3032	PREDICTED: trifunctional enzyme subunit beta, mitochondrial isoform X1	0	30.621	16	7	22	7	1	481	52.1	9.42	77.84	7
94538322	NP_005317.2	HAGH	3029	hydroxyacylglutathione hydrolase, mitochondrial isoform 1 precursor	0	34.483	27	6	30	6	1	308	33.8	8.12	101.2	6
sp	NP_002100.2	HARS	3035	histidine--tRNA ligase, cytoplasmic isoform 1	0	54.463	25	14	83	9	1	509	57.4	5.88	226.22	14
767937686	XP_011535921.1	HARS2	23438	PREDICTED: probable histidine--tRNA ligase, mitochondrial isoform X1	0	28.654	14	7	42	2	1	512	57.5	8.02	117.31	7
4504341	NP_003633.1	HAT1	8520	histone acetyltransferase type B catalytic subunit	0	26.575	19	6	29	6	1	419	49.5	5.69	95.16	6
19923971	NP_612452.1	HAUS1	115106	HAUS augmin-like complex subunit 1	0.007	3.257	3	1	1	1	1	278	31.8	5.53	2.99	1
8922430	NP_060567.1	HAUS2	55142	HAUS augmin-like complex subunit 2 isoform 1	0.003	4.41	4	1	1	1	1	235	26.9	7.88	2.82	1
56711324	NP_078787.2	HAUS3	79441	HAUS augmin-like complex subunit 3	0.004	3.604	2	1	2	1	1	603	69.6	5.55	2.19	1
261824037	NP_001159741.1	HAUS4	54930	HAUS augmin-like complex subunit 4 isoform 1	0	12.265	9	3	7	3	1	363	42.4	5.68	21.01	3
149944680	NP_056117.1	HAUS5	23354	HAUS augmin-like complex subunit 5	0	15.772	8	4	6	4	1	633	71.6	8.51	16.32	4	Acetyl [N-Term]
31377562	NP_060115.3	HAUS6	54801	HAUS augmin-like complex subunit 6 isoform 1	0	35.229	10	8	23	8	1	955	108.6	6.47	83.62	8
66346717	NP_059988.3	HAUS7	55559	HAUS augmin-like complex subunit 7	0	6.09	9	2	2	2	1	368	40.8	4.83	6.17	2
58761504	NP_219485.1	HAUS8	93323	HAUS augmin-like complex subunit 8 isoform a	0.002	4.757	2	1	5	1	1	410	44.8	7.06	13.5	1
13435356	NP_006109.2	HAX1	10456	HCLS1-associated protein X-1 isoform a	0	26.304	33	6	16	6	1	279	31.6	4.92	69.81	6
4504347	NP_000549.1	HBA1	3039	hemoglobin subunit alpha	0	26.304	33	4	65	4	1	142	15.2	8.68	195.91	4
4504349	NP_000509.1	HBB	3043	hemoglobin subunit beta	0	36.983	51	6	42	6	1	147	16	7.28	119.17	6
4503413	NP_001936.1	HBEGF	1839	proheparin-binding EGF-like growth factor precursor	0	10.631	11	2	7	2	1	208	23.1	9.38	21.4	2
5729864	NP_006611.1	HBS1L	10767	HBS1-like protein isoform 1	0	9.41	3	2	5	2	1	684	75.4	6.61	11.77	2
285002259	NP_001165462.1	HCCS	3052	cytochrome c-type heme lyase	0	8.751	10	3	8	3	1	268	30.6	6.68	14.64	3
578838841	XP_006724878.1	HCFC1	3054	PREDICTED: host cell factor 1 isoform X1	0	158.92	17	29	171	2	1	2080	213.3	7.33	627.61	29
768039909	XP_011529449.1	HCFC1	3054	PREDICTED: host cell factor 1 isoform X3	0	158.02	18	28	173	1	1	2039	209	7.53	642.8	28
167234422	NP_005326.2	HCLS1	3059	hematopoietic lineage cell-specific protein isoform 1	0	204.845	42	21	170	21	1	486	54	4.81	770.64	21
13128860	NP_004955.2	HDAC1	3065	histone deacetylase 1	0	84.656	30	11	89	7	1	482	55.1	5.48	347.85	11
293336691	NP_001518.3	HDAC2	3066	histone deacetylase 2	0	53.998	23	8	68	4	1	488	55.3	5.91	238.8	8
13128862	NP_003874.2	HDAC3	8841	histone deacetylase 3	0	10.159	4	2	9	1	1	428	48.8	5.16	19.7	2
767920742	XP_011510519.1	HDAC4	9759	PREDICTED: histone deacetylase 4 isoform X1	0	29.867	7	7	18	7	1	1113	122.5	6.86	51.44	7
1034674705	XP_011529288.2	HDAC8	55869	PREDICTED: histone deacetylase 8 isoform X1	0.009	2.687	4	1	2	1	1	441	49.3	6.74	3.53	1
116875826	NP_057147.2	HDDC2	51020	HD domain-containing protein 2	0.002	4.878	6	1	7	1	1	204	23.4	5.49	24.52	1
4758516	NP_004485.1	HDGF	3068	hepatoma-derived growth factor isoform a	0	78.387	61	11	104	11	1	240	26.8	4.73	417.92	11
768004469	XP_011526677.1	HDGFRP2	84717	PREDICTED: hepatoma-derived growth factor-related protein 2 isoform X1	0	14.782	5	4	7	4	1	695	76.7	7.4	21.61	4
578827046	XP_006720617.1	HDGFRP3	50810	PREDICTED: hepatoma-derived growth factor-related protein 3 isoform X1	0	9.881	8	1	4	1	1	212	23.7	7.31	11.06	1
767999390	XP_011524529.1	HDHD2	84064	PREDICTED: haloacid dehalogenase-like hydrolase domain-containing protein 2 isoform X1	0.004	3.805	3	1	5	1	1	259	28.5	6.24	10.25	1
751368084	NP_001291439.1	HDHD3	81932	haloacid dehalogenase-like hydrolase domain-containing protein 3	0.002	4.867	6	1	5	1	1	251	28	6.71	19.82	1
578804201	XP_005247059.2	HDLBP	3069	PREDICTED: vigilin isoform X1	0	40.147	8	9	27	9	1	1268	141.4	6.87	90.11	9
73695475	NP_060542.4	HEATR1	55127	HEAT repeat-containing protein 1	0	23.386	3	6	9	6	1	2144	242.2	6.54	22.77	6
41281996	NP_891552.1	HEATR3	55027	HEAT repeat-containing protein 3	0	16.674	7	3	10	3	1	680	74.5	5.11	34.79	3
20336761	NP_057071.2	HEBP1	50865	heme-binding protein 1	0	10.626	16	2	5	2	1	189	21.1	5.8	16.93	2
7657603	NP_055135.1	HEBP2	23593	heme-binding protein 2	0.004	4.036	13	2	2	2	1	205	22.9	4.63	3.11	2
612339310	NP_056197.3	HECTD1	25831	E3 ubiquitin-protein ligase HECTD1	0	11.867	2	3	5	3	1	2610	289.2	5.35	14.89	3
157738609	NP_078878.3	HECTD3	79654	E3 ubiquitin-protein ligase HECTD3	0	7.356	3	2	3	2	1	861	97.1	5.64	9.88	2
574275033	NP_001275996.1	HELLS	3070	lymphoid-specific helicase isoform 2	0	26.628	11	8	19	8	1	884	102.7	7.65	47.56	8
530413304	XP_005257945.1	HELZ	9931	PREDICTED: probable helicase with zinc finger domain isoform X2	0.015	2.263	0	1	2	1	1	1969	221.6	7.44	3.65	1
126032348	NP_004658.3	HERC2	8924	E3 ubiquitin-protein ligase HERC2	0.002	4.774	0	2	2	2	1	4834	526.9	6.28	3.86	2
767962380	XP_011537894.1	HERC4	26091	PREDICTED: probable E3 ubiquitin-protein ligase HERC4 isoform X1	0.032	1.767	1	1	1	1	1	1081	121.1	6.29	2.25	1
974005364	NP_001305754.1	HEXA	3073	beta-hexosaminidase subunit alpha isoform 1 precursor	0	13.794	10	5	9	5	1	540	62	5.21	20.36	5
4504373	NP_000512.1	HEXB	3074	beta-hexosaminidase subunit beta isoform 1 preproprotein	0	28.272	13	5	21	5	1	556	63.1	6.76	74.19	5
5453682	NP_006451.1	HEXIM1	10614	protein HEXIM1	0	27.511	19	4	21	4	1	359	40.6	4.89	69.42	4
13124773	NP_057542.2	HGH1	51236	protein HGH1 homolog	0	17.627	14	5	12	5	1	390	42.1	4.81	28.86	5
4758528	NP_004703.1	HGS	9146	hepatocyte growth factor-regulated tyrosine kinase substrate	0	18.485	10	5	12	5	1	777	86.1	6.16	27.46	5
23308751	NP_689953.1	HIBADH	11112	3-hydroxyisobutyrate dehydrogenase, mitochondrial precursor	0	16.948	14	3	9	3	1	336	35.3	8.13	30.08	3
767917547	XP_011509255.1	HIBCH	26275	PREDICTED: 3-hydroxyisobutyryl-CoA hydrolase, mitochondrial isoform X1	0	12.745	8	3	8	3	1	386	43.5	8.19	23.97	3
4885413	NP_005331.1	HINT1	3094	histidine triad nucleotide-binding protein 1	0	27.637	31	6	39	6	1	126	13.8	6.95	129.24	6
14211923	NP_115982.1	HINT2	84681	histidine triad nucleotide-binding protein 2, mitochondrial precursor	0	21.683	25	3	26	3	1	163	17.2	9.16	97.26	3
189217863	NP_612638.3	HINT3	135114	histidine triad nucleotide-binding protein 3	0.006	3.464	5	1	1	1	1	182	20.3	6.6	2.36	1
48762942	NP_003950.1	HIP1R	9026	huntingtin-interacting protein 1-related protein isoform 1	0	24.559	7	6	9	6	1	1068	119.3	6.67	22.59	6
21536485	NP_003316.3	HIRA	7290	protein HIRA	0	25.253	9	6	10	6	1	1017	111.8	8.07	35.69	6
21396500	NP_003600.2	HIRIP3	8479	HIRA-interacting protein 3 isoform 1	0	11.647	8	3	10	3	1	556	61.9	8.54	29.34	3
4885381	NP_005313.1	HIST1H1B	3009	histone H1.5	0	70.764	27	10	296	7	1	226	22.6	10.92	979.28	10
4885377	NP_005311.1	HIST1H1D	3007	histone H1.3	0	79.169	28	11	316	8	1	221	22.3	11.02	1046.33	11
10800130	NP_066409.1	HIST1H2AD	3013	histone H2A type 1-D	0	38.915	35	6	370	1	1	130	14.1	10.9	929.21	6
10800140	NP_066406.1	HIST1H2BB	3018	histone H2B type 1-B	0	56.352	50	8	1380	2	1	126	13.9	10.32	2435.91	8
530381854	XP_005249096.1	HIST1H2BD	3017	PREDICTED: histone H2B type 1-D isoform X1	0	59.1	42	9	1430	3	1	150	16.3	10.32	2583.52	9
4504285	NP_003522.1	HIST1H3C	8352	histone H3.1	0	23.038	44	6	464	6	1	136	15.4	11.12	654.59	6
4504317	NP_003537.1	HIST1H4L	8368	histone H4	0	98.018	58	10	1385	10	1	103	11.4	11.36	3760.4	10
28195394	NP_778235.1	HIST2H2AB	317772	histone H2A type 2-B	0	9.887	18	3	105	1	1	130	14	10.89	260.59	3
15617199	NP_254280.1	HIST3H2A	92815	histone H2A type 3	0	39.11	35	6	260	1	1	130	14.1	11.05	710.83	6
83816964	NP_060880.3	HJURP	55355	Holliday junction recognition protein isoform a	0.006	3.281	1	1	1	1	1	748	83.5	9.31	2.13	1
1016841120	NP_001309294.1	HK1	3098	hexokinase-1 isoform a	0	30.332	9	10	33	8	1	952	106.2	7.06	86.53	10
530367515	XP_005264337.1	HK2	3099	PREDICTED: hexokinase-2 isoform X1	0	80.298	17	14	56	12	1	938	104.7	6.16	189.86	14
530429121	XP_005275388.1	HLA-A	3105	PREDICTED: HLA class I histocompatibility antigen, A-1 alpha chain isoform X2	0	16.07	25	4	6	3	1	391	44	6.64	19	4
24797067	NP_002107.3	HLA-A	3105	HLA class I histocompatibility antigen, A-1 alpha chain precursor	0.05	1.377	4	1	1	1	1	365	40.8	6	2.77	1
17986001	NP_005505.2	HLA-B	3106	major histocompatibility complex, class I, B precursor	0	10.141	8	2	5	1	1	362	40.4	5.85	19.32	2
339882741	NP_001229971.1	HLA-C	3107	HLA class I histocompatibility antigen, Cw-1 alpha chain precursor	0	13.66	10	3	7	1	1	366	40.7	5.87	24.72	3
52630342	NP_002108.4	HLA-C	3107	HLA class I histocompatibility antigen, Cw-1 alpha chain precursor	0	11.482	12	3	5	1	1	366	40.6	6.04	17.48	3
1034650071	XP_016866296.1	HLA-E	3133	PREDICTED: HLA class I histocompatibility antigen, alpha chain E isoform X1	0.012	2.429	4	1	1	1	1	399	44.5	6.48	3.65	1
530418853	XP_005261010.1	HLCS	3141	PREDICTED: biotin--protein ligase isoform X1	0.016	2.156	1	1	1	1	1	873	97.2	5.95	2.55	1
767927426	XP_011511393.1	HLTF	6596	PREDICTED: helicase-like transcription factor isoform X1	0	22.525	6	5	12	5	1	1013	114.3	8.6	32.99	5
23308607	NP_110416.1	HM13	81502	minor histocompatibility antigen H13 isoform 1	0	15.129	12	3	5	3	1	377	41.5	6.43	26.87	3
20149500	NP_000181.2	HMBS	3145	porphobilinogen deaminase isoform 1	0	17.505	10	3	10	3	1	361	39.3	7.18	39.08	3
1034634608	XP_016862366.1	HMCES	56941	PREDICTED: embryonic stem cell-specific 5-hydroxymethylcytosine-binding protein isoform X1	0	15.889	12	3	9	3	1	354	40.5	8.15	35.03	3
751557624	NP_001291433.1	HMG20A	10363	high mobility group protein 20A isoform a	0	5.944	6	2	5	2	1	347	40.1	6.49	15.69	2
977380210	NP_001306008.1	HMGA1	3159	high mobility group protein HMG-I/HMG-Y isoform a	0	21.243	41	3	77	1	1	107	11.7	10.32	238.38	3
977380206	NP_001306006.1	HMGA1	3159	high mobility group protein HMG-I/HMG-Y isoform b	0	17.624	34	3	74	1	1	96	10.7	10.32	213.49	3
665506022	NP_001287848.1	HMGA2	8091	high mobility group protein HMGI-C isoform d	0.003	4.402	9	1	2	1	1	147	16.4	11.59	7.51	1
926459555	NP_001300821.1	HMGB1	3146	high mobility group protein B1	0	160.237	63	18	223	14	1	215	24.9	5.74	909.02	18
194688135	NP_001124161.1	HMGB2	3148	high mobility group protein B2	0	133.494	54	16	224	12	1	209	24	7.81	885.35	16
669033286	NP_001288160.1	HMGB3	3149	high mobility group protein B3 isoform b	0	52.345	34	11	58	10	1	220	25.5	9.06	197.05	11
62198232	NP_000182.2	HMGCL	3155	hydroxymethylglutaryl-CoA lyase, mitochondrial isoform 1 precursor	0	10.739	11	3	6	3	1	325	34.3	8.54	18.87	3
1023300935	NP_001311148.1	HMGCS1	3157	hydroxymethylglutaryl-CoA synthase, cytoplasmic isoform 1	0	8.43	6	3	7	3	1	520	57.3	5.41	19.19	3
48255933	NP_004956.5	HMGN1	3150	non-histone chromosomal protein HMG-14	0	34.248	51	4	19	4	1	100	10.7	9.6	81.79	4
5031749	NP_005508.1	HMGN2	3151	non-histone chromosomal protein HMG-17	0	34.724	34	4	20	4	1	90	9.4	9.99	76.5	4
20270186	NP_004233.1	HMGN3	9324	high mobility group nucleosome-binding domain-containing protein 3 isoform a	0.073	1.174	27	1	1	1	1	99	10.7	9.66	0	1
10835240	NP_006344.1	HMGN4	10473	high mobility group nucleosome-binding domain-containing protein 4	0	17.258	19	2	10	2	1	90	9.5	10.48	45.53	2
13540523	NP_110390.1	HMGN5	79366	high mobility group nucleosome-binding domain-containing protein 5	0	35.737	20	3	52	1	1	282	31.5	4.55	244.76	3
578838471	XP_006724751.1	HMGN5	79366	PREDICTED: high mobility group nucleosome-binding domain-containing protein 5 isoform X1	0	25.717	20	3	13	1	1	283	31.6	4.55	75.95	3
768001677	XP_011526160.1	HMHA1	23526	PREDICTED: minor histocompatibility protein HA-1 isoform X1	0	15.047	4	3	10	3	1	1168	127.8	6.09	45.33	3
217272802	NP_001136028.1	HMMR	3161	hyaluronan mediated motility receptor isoform a	0	18.045	8	3	5	3	1	725	84.2	5.9	22.95	3
555943918	NP_001273196.1	HMOX2	3163	heme oxygenase 2 isoform a	0	17.907	9	4	7	4	1	370	41.6	5.44	20.27	4
50345294	NP_001002032.1	HN1	51155	hematological and neurological expressed 1 protein isoform 2	0	28.882	18	2	72	2	1	181	19.9	8.32	324.02	2
21700763	NP_653171.1	HN1L	90861	hematological and neurological expressed 1-like protein	0	48.974	54	9	71	9	1	190	20.1	9.26	250.23	9	Acetyl [N-Term]
5803036	NP_006796.1	HNRNPA0	10949	heterogeneous nuclear ribonucleoprotein A0	0	48.233	30	7	89	7	1	305	30.8	9.29	273.43	7	Acetyl [N-Term]
14043070	NP_112420.1	HNRNPA1	3178	heterogeneous nuclear ribonucleoprotein A1 isoform b	0	86.357	38	12	166	11	1	372	38.7	9.13	668.7	12
530384720	XP_005249786.1	HNRNPA2B1	3181	PREDICTED: heterogeneous nuclear ribonucleoproteins A2/B1 isoform X1	0	172.163	62	21	540	2	1	353	37.4	8.95	1900.15	21
1034655292	XP_016867598.1	HNRNPA2B1	3181	PREDICTED: heterogeneous nuclear ribonucleoproteins A2/B1 isoform X2	0	169.031	64	20	518	1	1	341	36	8.65	1851.74	20	Acetyl [N-Term]
1034612422	XP_016859076.1	HNRNPA3	220988	PREDICTED: heterogeneous nuclear ribonucleoprotein A3 isoform X2	0	73.63	33	11	86	2	1	356	37	8.31	342.47	11	Acetyl [N-Term]
34740329	NP_919223.1	HNRNPA3	220988	heterogeneous nuclear ribonucleoprotein A3	0	71.101	35	13	74	4	1	378	39.6	9.01	283.4	13	Acetyl [N-Term]
55956921	NP_004490.2	HNRNPAB	3182	heterogeneous nuclear ribonucleoprotein A/B isoform b	0	74.034	40	14	155	13	1	285	30.6	7.91	529.29	14
767980426	XP_011535012.1	HNRNPC	3183	PREDICTED: heterogeneous nuclear ribonucleoproteins C1/C2 isoform X1	0	115.043	45	17	270	17	1	306	33.7	5.08	725.23	17
14110420	NP_112738.1	HNRNPD	3184	heterogeneous nuclear ribonucleoprotein D0 isoform a	0	158.992	42	17	226	15	1	355	38.4	7.81	866.71	17
14110407	NP_112740.1	HNRNPDL	9987	heterogeneous nuclear ribonucleoprotein D-like isoform a	0	64.706	28	11	93	9	1	420	46.4	9.57	311.36	11
148470404	NP_001091674.1	HNRNPF	3185	heterogeneous nuclear ribonucleoprotein F	0	111.235	42	13	256	11	1	415	45.6	5.58	924.01	13	Acetyl [N-Term]
530381015	XP_005265952.1	HNRNPH1	3187	PREDICTED: heterogeneous nuclear ribonucleoprotein H isoform X1	0	136.807	36	13	336	7	1	472	51.2	6.8	1174.67	13	Acetyl [N-Term]
74099697	NP_001027565.1	HNRNPH2	3188	heterogeneous nuclear ribonucleoprotein H2	0	100.326	33	11	221	6	1	449	49.2	6.3	773.43	11	Acetyl [N-Term]
1016841132	NP_001309365.1	HNRNPH3	3189	heterogeneous nuclear ribonucleoprotein H3 isoform a	0	52.208	37	10	138	10	1	346	36.9	6.87	426.37	10
530391069	XP_005252022.1	HNRNPK	3190	PREDICTED: heterogeneous nuclear ribonucleoprotein K isoform X3	0	171.205	49	23	545	23	1	440	48.5	5.54	1845.03	23	Acetyl [N-Term]
52632383	NP_001524.2	HNRNPL	3191	heterogeneous nuclear ribonucleoprotein L isoform a	0	184.833	49	21	304	20	1	589	64.1	8.22	1180.37	21
578803257	XP_005264696.2	HNRNPLL	92906	PREDICTED: heterogeneous nuclear ribonucleoprotein L-like isoform X1	0	54.622	20	9	36	8	1	595	66.4	7.49	109.89	9
14141152	NP_005959.2	HNRNPM	4670	heterogeneous nuclear ribonucleoprotein M isoform a	0	197.532	44	27	381	27	1	730	77.5	8.7	1213.46	27
156151394	NP_001095868.1	HNRNPR	10236	heterogeneous nuclear ribonucleoprotein R isoform 1	0	110.447	29	17	294	11	1	636	71.2	8.13	846.63	17
74136883	NP_114032.2	HNRNPU	3192	heterogeneous nuclear ribonucleoprotein U isoform a	0	264.043	32	31	487	31	1	825	90.5	6	1836.02	31
530415584	XP_005258516.1	HNRNPUL1	11100	PREDICTED: heterogeneous nuclear ribonucleoprotein U-like protein 1 isoform X1	0	113.228	20	15	125	15	1	866	96.8	6.92	526.67	15
118601081	NP_001073027.1	HNRNPUL2	221092	heterogeneous nuclear ribonucleoprotein U-like protein 2	0	92.089	23	13	100	13	1	747	85.1	4.91	364.6	13
4759198	NP_004263.1	HOMER1	9456	homer protein homolog 1 isoform 1	0.006	3.292	5	1	1	1	1	354	40.3	5.44	2.91	1
14165274	NP_115786.1	HOOK3	84376	protein Hook homolog 3	0	22.825	7	5	6	5	1	718	83.1	5.17	20.94	5	Acetyl [N-Term]
56676330	NP_057371.2	HP1BP3	50809	heterochromatin protein 1-binding protein 3	0	25.244	13	7	37	7	1	553	61.2	9.67	99.44	7
1034640299	XP_016863821.1	HPF1	54969	PREDICTED: UPF0609 protein C4orf27 isoform X1	0	24.826	15	5	17	5	1	367	41.7	7.46	54.68	5
4504483	NP_000185.1	HPRT1	3251	hypoxanthine-guanine phosphoribosyltransferase	0	49.077	33	8	59	8	1	218	24.6	6.68	174.44	8
57864582	NP_001009931.1	HRNR	388697	hornerin	0	38.143	4	4	18	4	1	2850	282.2	10.04	73.31	4
6912420	NP_036394.1	HS2ST1	9653	heparan sulfate 2-O-sulfotransferase 1 isoform 1	0.002	4.856	4	1	3	1	1	356	41.9	8.69	9.01	1
4557647	NP_001528.1	HSBP1	3281	heat shock factor-binding protein 1	0.08	1.115	9	1	1	1	1	76	8.5	4.36	0	1
50301234	NP_741999.3	HSCB	150274	iron-sulfur cluster co-chaperone protein HscB, mitochondrial isoform 1 precursor	0.002	4.98	4	1	3	1	1	235	27.4	7.69	6.61	1
4758504	NP_004484.1	HSD17B10	3028	3-hydroxyacyl-CoA dehydrogenase type-2 isoform 1	0	55.366	28	7	110	7	1	261	26.9	7.78	437.3	7
613410229	NP_057329.3	HSD17B11	51170	estradiol 17-beta-dehydrogenase 11 precursor	0	9.465	11	2	4	2	1	300	32.9	9.17	12.29	2
7705855	NP_057226.1	HSD17B12	51144	very-long-chain 3-oxoacyl-CoA reductase	0	12.563	10	3	22	3	1	312	34.3	9.32	63.31	3
4504505	NP_000405.1	HSD17B4	3295	peroxisomal multifunctional enzyme type 2 isoform 2	0	82.177	31	17	61	17	1	736	79.6	8.84	199.95	17
7705421	NP_057455.1	HSD17B7	51478	3-keto-steroid reductase isoform 1	0.002	5.132	4	1	3	1	1	341	38.2	8.1	11.47	1
15277342	NP_055049.1	HSD17B8	7923	estradiol 17-beta-dehydrogenase 8	0.002	4.684	5	1	2	1	1	261	27	6.54	6.58	1
530424405	XP_005256246.1	HSDL1	83693	PREDICTED: inactive hydroxysteroid dehydrogenase-like protein 1 isoform X1	0	5.697	4	1	3	1	1	330	37	8.72	13.58	1
40254986	NP_115679.2	HSDL2	84263	hydroxysteroid dehydrogenase-like protein 2 isoform 1	0	25.456	15	4	16	4	1	418	45.4	7.99	61.81	4
530389521	XP_005272372.1	HSF1	3297	PREDICTED: heat shock factor protein 1 isoform X1	0.006	3.349	1	1	1	1	1	557	60.2	5.35	2.65	1
153792590	NP_001017963.2	HSP90AA1	3320	heat shock protein HSP 90-alpha isoform 1	0	353.689	45	47	1483	27	1	854	98.1	5.16	4608.17	47
20149594	NP_031381.2	HSP90AB1	3326	heat shock protein HSP 90-beta isoform a	0	353.661	49	47	1319	25	1	724	83.2	5.03	4027.93	47
4507677	NP_003290.1	HSP90B1	7184	endoplasmin precursor	0	161.945	28	26	198	24	1	803	92.4	4.84	744.74	26
82880658	NP_057383.2	HSPA14	51182	heat shock 70 kDa protein 14 isoform 1	0	9.307	7	2	6	2	1	509	54.8	5.59	17.08	2
167466173	NP_005337.2	HSPA1B	3304	heat shock 70 kDa protein 1B	0	56.303	17	10	108	5	1	641	70	5.66	351.11	10
13676857	NP_068814.2	HSPA2	3306	heat shock-related 70 kDa protein 2	0	95.26	19	13	275	1	1	639	70	5.74	1115.41	13
38327039	NP_002145.3	HSPA4	3308	heat shock 70 kDa protein 4	0	209.907	46	35	260	32	1	840	94.3	5.19	937.63	35
959092920	NP_001304310.1	HSPA4L	22824	heat shock 70 kDa protein 4L isoform 2	0	36.16	10	8	58	4	1	870	97.6	5.95	202.04	8
16507237	NP_005338.1	HSPA5	3309	78 kDa glucose-regulated protein precursor	0	228.564	45	31	415	29	1	654	72.3	5.16	1545.31	31
767970091	XP_011541100.1	HSPA8	3312	PREDICTED: heat shock cognate 71 kDa protein isoform X1	0	328.209	51	35	920	22	1	646	70.9	5.52	3485.57	35
24234688	NP_004125.3	HSPA9	3313	stress-70 protein, mitochondrial precursor	0	208.311	47	31	300	31	1	679	73.6	6.16	1069.16	31
4504517	NP_001531.1	HSPB1	3315	heat shock protein beta-1	0	34.922	29	4	37	4	1	205	22.8	6.4	145.64	4
662236737	NP_001284529.1	HSPBP1	23640	hsp70-binding protein 1 isoform 1	0	37.384	20	6	31	6	1	405	44.4	6.47	107.95	6
31542947	NP_002147.2	HSPD1	3329	60 kDa heat shock protein, mitochondrial	0	189.782	56	32	333	32	1	573	61	5.87	1157.8	32
4504523	NP_002148.1	HSPE1	3336	10 kDa heat shock protein, mitochondrial	0	53.529	87	11	124	6	1	102	10.9	8.92	403.45	11
321117267	NP_001189414.1	HSPE1-MOB4	100529241	HSPE1-MOB4 protein	0	24.714	19	6	72	1	1	261	29.7	6.16	223.67	6
42544159	NP_006635.2	HSPH1	10808	heat shock protein 105 kDa isoform 1	0	182.262	36	30	238	25	1	858	96.8	5.39	789.95	30
148728166	NP_001091990.1	HTATIP2	10553	oxidoreductase HTATIP2 isoform a precursor	0.002	4.769	4	1	3	1	1	276	30.1	8.38	11.67	1
253970456	NP_001156752.1	HTATSF1	27336	HIV Tat-specific factor 1	0	52.899	20	8	41	8	1	755	85.8	4.4	169.29	8
7019477	NP_037379.1	HTRA2	27429	serine protease HTRA2, mitochondrial isoform 1 preproprotein	0.035	1.704	2	1	1	1	1	458	48.8	10.07	2.42	1
90903231	NP_002102.4	HTT	3064	huntingtin	0	6.983	1	2	2	2	1	3144	347.6	6.2	5.48	2
1034673294	XP_016884689.1	HUWE1	10075	PREDICTED: E3 ubiquitin-protein ligase HUWE1 isoform X8	0	159.619	9	31	123	31	1	4464	489.8	5.22	425.5	31
1034571662	XP_016872584.1	HYOU1	10525	PREDICTED: hypoxia up-regulated protein 1 isoform X1	0	64.979	17	13	76	13	1	1000	111.3	5.22	250.88	13
88853865	NP_001034702.1	IAH1	285148	isoamyl acetate-hydrolyzing esterase 1 homolog isoform a precursor	0	8.354	10	2	6	2	1	248	27.6	5.3	18.16	2
94721241	NP_002152.2	IARS	3376	isoleucine--tRNA ligase, cytoplasmic	0	75.217	16	17	100	17	1	1262	144.4	6.15	289.34	17	Acetyl [N-Term]
46852147	NP_060530.3	IARS2	55699	isoleucine--tRNA ligase, mitochondrial precursor	0	66.062	15	12	55	12	1	1012	113.7	7.2	172.39	12
58197556	NP_001010867.1	IBA57	200205	putative transferase CAF17, mitochondrial isoform 1 precursor	0	5.652	4	1	5	1	1	356	38.1	9.83	21.48	1
153082722	NP_001093259.1	ICAM2	3384	intercellular adhesion molecule 2 precursor	0.019	2.072	3	1	2	1	1	275	30.6	7.43	3.92	1
149363685	NP_056140.1	ICE1	23379	little elongation complex subunit 1	0.002	5.025	1	1	1	1	1	2266	247.7	5.48	3.64	1
6912430	NP_036537.1	ICMT	23463	protein-S-isoprenylcysteine O-methyltransferase	0.004	4.192	3	1	7	1	1	284	31.9	7.96	15.99	1
31317299	NP_002156.2	ID1	3397	DNA-binding protein inhibitor ID-1 isoform a	0.002	4.805	12	1	1	1	1	155	16.1	6.99	3.81	1
1017029415	NP_001309722.1	IDE	3416	insulin-degrading enzyme isoform 3	0	27.604	10	8	18	8	1	1019	117.9	6.92	53.01	8
538917681	NP_001269316.1	IDH1	3417	isocitrate dehydrogenase [NADP] cytoplasmic	0	29.503	18	7	26	5	1	414	46.6	7.01	65.79	7
28178832	NP_002159.2	IDH2	3418	isocitrate dehydrogenase [NADP], mitochondrial isoform 1 precursor	0	113.497	38	18	252	16	1	452	50.9	8.69	844.49	18
5031777	NP_005521.1	IDH3A	3419	isocitrate dehydrogenase [NAD] subunit alpha, mitochondrial precursor	0	46.187	23	10	47	10	1	366	39.6	6.92	152.25	10
530425723	XP_005260773.1	IDH3B	3420	PREDICTED: isocitrate dehydrogenase [NAD] subunit beta, mitochondrial isoform X1	0	45.562	26	10	38	10	1	387	42.4	8.46	116.26	10
4758582	NP_004126.1	IDH3G	3421	isocitrate dehydrogenase [NAD] subunit gamma, mitochondrial isoform a precursor	0	5.726	4	2	11	2	1	393	42.8	8.5	23.31	2
40018633	NP_004499.2	IDI1	3422	isopentenyl-diphosphate Delta-isomerase 1 isoform a	0	18.452	12	4	13	4	1	284	32.5	7.88	39.74	4
7705819	NP_057181.1	IER3IP1	51124	immediate early response 3-interacting protein 1 precursor	0	10.738	34	2	4	2	1	82	9	8.22	11.63	2
530364640	XP_005245184.1	IFI16	3428	PREDICTED: gamma-interferon-inducible protein 16 isoform X1	0	164.656	30	20	335	20	1	789	88.6	9.29	1244.69	20
148612842	NP_066362.2	IFITM3	10410	interferon-induced transmembrane protein 3	0	7.109	12	1	5	1	1	133	14.6	7.01	21.62	1
295148109	NP_001171172.1	IFT27	11020	intraflagellar transport protein 27 homolog isoform 1	0	8.693	13	2	6	2	1	186	20.5	5.41	18.33	2
151101140	NP_001092693.1	IFT74	80173	intraflagellar transport protein 74 homolog isoform a	0.013	2.383	3	1	1	1	1	600	69.2	6	2.35	1
1034674215	XP_016884978.1	IGBP1	3476	PREDICTED: immunoglobulin-binding protein 1 isoform X1	0	21.455	15	3	14	3	1	339	39.2	5.38	61.01	3
1034590455	XP_016877626.1	IGF1R	3480	PREDICTED: insulin-like growth factor 1 receptor isoform X1	0.009	2.759	1	1	1	1	1	1392	157.8	5.68	1.7	1
631226390	NP_001278798.1	IGF2BP2	10644	insulin-like growth factor 2 mRNA-binding protein 2 isoform c	0	10.333	4	2	4	1	1	605	66.7	8.46	12.97	2
767944776	XP_011513391.1	IGF2BP3	10643	PREDICTED: insulin-like growth factor 2 mRNA-binding protein 3 isoform X1	0	79.245	24	14	75	13	1	584	64.2	8.94	266.08	14
119964726	NP_000867.2	IGF2R	3482	cation-independent mannose-6-phosphate receptor precursor	0	146.235	13	25	123	25	1	2491	274.1	5.91	455.14	25
119392094	NP_002171.2	IGHMBP2	3508	DNA-binding protein SMUBP-2	0	10.155	3	3	3	3	1	993	109.1	8.97	7.8	3
16445029	NP_443100.1	IGSF8	93185	immunoglobulin superfamily member 8 precursor	0	8.552	6	2	3	2	1	613	65	8	9.75	2
125988409	NP_006074.2	IK	3550	protein Red	0	59.334	25	11	40	11	1	557	65.6	6.64	136.27	11
767958570	XP_011517438.1	IKBKAP	8518	PREDICTED: elongator complex protein 1 isoform X1	0	37.802	7	6	22	6	1	1346	151.7	5.86	78.7	6
530387747	XP_005273547.1	IKBKB	3551	PREDICTED: inhibitor of nuclear factor kappa-B kinase subunit beta isoform X1	0.002	5.038	2	1	1	1	1	805	91.8	6.46	3.33	1
223671870	NP_001093326.2	IKBKG	8517	NF-kappa-B essential modulator isoform b	0	24.891	18	6	13	6	1	487	55.8	6.7	37.78	6
767944726	XP_011513369.1	IKZF1	10320	PREDICTED: DNA-binding protein Ikaros isoform X6	0	35.814	19	7	40	6	1	521	57.7	6.27	141.09	7
767917203	XP_011509105.1	IKZF2	22807	PREDICTED: zinc finger protein Helios isoform X1	0	23.961	11	4	13	3	1	533	60.3	6.79	43.66	4
33589816	NP_036613.2	IKZF3	22806	zinc finger protein Aiolos isoform 1	0	14.4	7	3	9	2	1	509	58	6.55	28.56	3
4557882	NP_000197.1	IL2RG	3561	cytokine receptor common subunit gamma precursor	0.002	5.07	4	1	1	1	1	369	42.3	6.34	3.41	1
24234747	NP_004506.2	ILF2	3608	interleukin enhancer-binding factor 2 isoform 1	0	78.873	35	10	225	10	1	390	43	5.26	857.23	10
212549553	NP_060090.2	ILF3	3609	interleukin enhancer-binding factor 3 isoform d	0	242.097	45	33	334	2	1	898	95.7	8.81	1169.22	33
24234750	NP_036350.2	ILF3	3609	interleukin enhancer-binding factor 3 isoform a	0	237.865	45	32	334	1	1	894	95.3	8.76	1161.7	32
767965806	XP_011518367.1	ILK	3611	PREDICTED: integrin-linked protein kinase isoform X1	0	13.639	7	3	17	3	1	452	51.4	8.07	50.24	3	Acetyl [N-Term]
13540531	NP_110395.1	ILKAP	80895	integrin-linked kinase-associated serine/threonine phosphatase 2C	0	31.31	18	7	23	7	1	392	42.9	7.09	69.46	7	Acetyl [N-Term]
530414456	XP_005259774.1	ILVBL	10994	PREDICTED: acetolactate synthase-like protein isoform X1	0	11.392	6	2	11	2	1	632	67.8	8.15	45.5	2
1034611141	XP_016858683.1	IMMT	10989	PREDICTED: MICOS complex subunit MIC60 isoform X1	0	164.29	41	30	176	30	1	758	83.6	6.48	609.8	30
8922794	NP_060755.1	IMP3	55272	U3 small nucleolar ribonucleoprotein protein IMP3	0	10.859	15	2	15	2	1	184	21.8	9.5	42.3	2
15529982	NP_219484.1	IMP4	92856	U3 small nucleolar ribonucleoprotein protein IMP4 isoform a	0	10.131	9	3	17	3	1	291	33.7	9.47	32.04	3
221625487	NP_001138350.1	IMPA1	3612	inositol monophosphatase 1 isoform 2	0	49.826	26	8	38	8	1	336	36.7	7.91	125.12	8
34328930	NP_000874.2	IMPDH1	3614	inosine-5'-monophosphate dehydrogenase 1 isoform a	0	5.348	3	2	8	1	1	599	64.3	7.02	21.24	2
578806039	XP_006713191.1	IMPDH2	3615	PREDICTED: inosine-5'-monophosphate dehydrogenase 2 isoform X1	0	122.555	30	18	245	17	1	608	66.1	8.5	1016.69	18
767968082	XP_011543297.1	INCENP	3619	PREDICTED: inner centromere protein isoform X1	0	51.755	17	12	37	12	1	933	107	9.48	119.83	12
530404494	XP_005268061.1	INF2	64423	PREDICTED: inverted formin-2 isoform X1	0	10.429	3	2	5	2	1	1281	139	5.57	16.74	2
597955373	NP_005528.4	ING1	3621	inhibitor of growth protein 1 isoform D	0	16.305	5	1	12	1	1	422	46.8	9.13	81.28	1
38708321	NP_060023.1	INO80	54617	DNA helicase INO80	0	16.49	4	5	7	5	1	1556	176.6	9.5	18.49	5
149408119	NP_001092287.1	INO80C	125476	INO80 complex subunit C isoform 1	0.004	3.68	6	1	4	1	1	228	24.5	10.17	6.83	1
197116361	NP_001127697.1	INPP4A	3631	type I inositol 3,4-bisphosphate 4-phosphatase isoform c	0	34.245	11	7	13	7	1	972	109.3	7.12	53.46	7
113722125	NP_005531.2	INPP5B	3633	type II inositol 1,4,5-trisphosphate 5-phosphatase isoform 1 precursor	0	6.132	3	2	3	2	1	913	103.9	5.36	8.47	2
64085167	NP_001017915.1	INPP5D	3635	phosphatidylinositol 3,4,5-trisphosphate 5-phosphatase 1 isoform a	0	48.792	10	9	30	9	1	1189	133.2	7.59	91.23	9	Acetyl [N-Term]
18765709	NP_057616.2	INPP5K	51763	inositol polyphosphate 5-phosphatase K isoform 1	0	9.081	6	2	5	2	1	448	51.1	6.54	11.53	2
530396744	XP_005274036.1	INPPL1	3636	PREDICTED: phosphatidylinositol 3,4,5-trisphosphate 5-phosphatase 2 isoform X1	0	6.023	2	2	3	2	1	1280	140.9	6.48	6.41	2
1034654877	XP_016867448.1	INTS1	26173	PREDICTED: integrator complex subunit 1 isoform X1	0	18.23	2	4	12	4	1	2251	250.3	6.15	38.74	4
21361851	NP_065128.2	INTS12	57117	integrator complex subunit 12	0.003	4.478	4	1	2	1	1	462	48.8	9.69	7.59	1
24308211	NP_065799.1	INTS2	57508	integrator complex subunit 2	0.024	1.94	1	1	1	1	1	1204	134.3	6.1	2.4	1
530365320	XP_005245516.1	INTS3	65123	PREDICTED: integrator complex subunit 3 isoform X1	0	6.264	2	2	4	2	1	1108	124.9	5.97	11.74	2
50086624	NP_291025.3	INTS4	92105	integrator complex subunit 4	0	6.848	3	2	2	2	1	963	108.1	6.44	6.64	2
44771201	NP_085131.1	INTS5	80789	integrator complex subunit 5	0	13.285	3	2	5	2	1	1019	107.9	7.05	15.52	2
767977573	XP_011533342.1	INTS6	26512	PREDICTED: integrator complex subunit 6 isoform X1	0	9.128	1	1	9	1	1	887	100.3	8.62	24.86	1
767908935	XP_011507698.1	INTS7	25896	PREDICTED: integrator complex subunit 7 isoform X1	0.008	3.135	2	2	3	2	1	998	111.1	8.15	2.19	2
578815369	XP_006716419.1	INTS9	55756	PREDICTED: integrator complex subunit 9 isoform X1	0	12.363	6	2	8	2	1	676	75.7	6.25	23.99	2
338827648	NP_001229758.1	IP6K1	9807	inositol hexakisphosphate kinase 1 isoform 1	0.008	2.994	2	1	2	1	1	441	50.2	7.24	2.74	1
198041777	NP_001128251.1	IPO11	51194	importin-11 isoform 1	0	18.379	2	2	7	2	1	1015	116.9	5.41	27.71	2
62460637	NP_078934.3	IPO4	79711	importin-4	0	56.941	12	10	43	10	1	1081	118.6	4.96	152.06	10	Acetyl [N-Term]
24797086	NP_002262.3	IPO5	3843	importin-5	0	121.406	18	16	172	16	1	1115	125.5	4.92	642.77	16
5453998	NP_006382.1	IPO7	10527	importin-7	0	35.412	8	7	36	6	1	1038	119.4	4.82	105.15	7	Acetyl [N-Term]
53759103	NP_006381.2	IPO8	10526	importin-8 isoform 1	0	11.968	3	3	4	2	1	1037	119.9	5.16	9.78	3
21361659	NP_060555.2	IPO9	55705	importin-9	0	33.531	8	8	41	8	1	1041	115.9	4.81	106.37	8
4506787	NP_003861.1	IQGAP1	8826	ras GTPase-activating-like protein IQGAP1	0	141.91	19	30	138	29	1	1657	189.1	6.48	519.36	30
767908426	XP_011507500.1	IQGAP3	128239	PREDICTED: ras GTPase-activating-like protein IQGAP3 isoform X1	0	8.045	1	2	5	1	1	1636	185.1	7.42	14.93	2
767974484	XP_011536734.1	IRAK4	51135	PREDICTED: interleukin-1 receptor-associated kinase 4 isoform X1	0.015	2.315	2	1	3	1	1	460	51.5	5.41	0	1
41352693	NP_004127.1	IREB2	3658	iron-responsive element-binding protein 2 isoform 1	0	8.013	3	2	4	2	1	963	105	7.05	12.69	2
24308115	NP_056464.1	IRF2BP1	26145	interferon regulatory factor 2-binding protein 1	0	15.054	15	5	10	5	1	584	61.6	8.18	33.63	5
116734704	NP_892017.2	IRF2BP2	359948	interferon regulatory factor 2-binding protein 2 isoform A	0	32.016	17	4	18	4	1	587	61	8.69	104.59	4
308199446	NP_001184051.1	IRF3	3661	interferon regulatory factor 3 isoform 2	0	6.714	5	2	6	2	1	452	49.1	6.52	17.77	2
530415704	XP_005258572.1	IRGQ	126298	PREDICTED: immunity-related GTPase family Q protein isoform X1	0	26.958	12	5	37	5	1	623	62.7	4.88	119.49	5
5031805	NP_005535.1	IRS1	3667	insulin receptor substrate 1	0.003	4.619	1	1	1	1	1	1242	131.5	8.54	2.94	1
160420328	NP_919255.2	ISCA2	122961	iron-sulfur cluster assembly 2 homolog, mitochondrial isoform 1 precursor	0.002	4.772	8	1	2	1	1	154	16.5	5.25	5.11	1
56699456	NP_998760.1	ISCU	23479	iron-sulfur cluster assembly enzyme ISCU, mitochondrial isoform 2 precursor	0	5.409	7	1	3	1	1	167	18	9.48	8.26	1
4826774	NP_005092.1	ISG15	9636	ubiquitin-like protein ISG15 precursor	0	7.831	13	2	9	2	1	165	17.9	7.44	28.55	2
578801551	XP_006711624.1	ISG20L2	81875	PREDICTED: interferon-stimulated 20 kDa exonuclease-like 2 isoform X1	0.013	2.397	2	1	2	1	1	353	39.1	9.94	4.02	1
103471987	NP_057132.2	ISOC1	51015	isochorismatase domain-containing protein 1	0	14.161	17	4	10	4	1	298	32.2	7.39	31.77	4
13376007	NP_078986.1	ISOC2	79763	isochorismatase domain-containing protein 2 isoform 2	0	5.329	7	1	4	1	1	221	24.1	7.77	16.33	1
401709932	NP_001257905.1	IST1	9798	IST1 homolog isoform c	0	22.154	11	5	15	5	1	379	41.5	5.57	51.3	5
325910836	NP_001191819.1	ISY1-RAB43	100534599	ISY1-RAB43 protein	0	19.813	12	4	13	4	1	331	37.5	5.78	47.73	4
380420335	NP_001244066.1	ITCH	83737	E3 ubiquitin-protein ligase Itchy homolog isoform 1	0	12.808	5	3	8	2	1	903	102.7	6.3	18.88	3
271397437	NP_060933.3	ITFG2	55846	integrin-alpha FG-GAP repeat-containing protein 2	0	7.174	6	2	3	2	1	447	49.3	5.22	8.81	2
67191027	NP_000876.3	ITGA4	3676	integrin alpha-4 isoform 1 preproprotein	0	29.301	7	6	21	6	1	1032	114.8	6.48	83.69	6
19743813	NP_002202.2	ITGB1	3688	integrin beta-1 isoform 1A precursor	0	26.273	10	6	17	6	1	798	88.4	5.39	51.33	6
735367775	NP_000202.3	ITGB2	3689	integrin beta-2 isoform 1 precursor	0	43.055	17	11	34	11	1	769	84.7	6.98	103.65	11
578835409	XP_006723627.1	ITPA	3704	PREDICTED: inosine triphosphate pyrophosphatase isoform X1	0	13.249	11	2	10	2	1	238	26.3	9.06	29.05	2
4504789	NP_002211.1	ITPKA	3706	inositol-trisphosphate 3-kinase A	0.026	1.877	2	1	9	1	1	461	51	7.65	22.35	1
1034579400	XP_016874755.1	ITPR2	3709	PREDICTED: inositol 1,4,5-trisphosphate receptor type 2 isoform X1	0	24.338	3	6	20	5	1	2721	310	6.39	79	6
153945846	NP_002215.2	ITPR3	3710	inositol 1,4,5-trisphosphate receptor type 3	0	8.484	1	2	5	1	1	2671	303.9	6.48	13.68	2
1034627469	XP_016883917.1	ITSN1	6453	PREDICTED: intersectin-1 isoform X1	0.024	1.924	1	1	2	1	1	1721	195.3	7.77	4.62	1
194294521	NP_006268.2	ITSN2	50618	intersectin-2 isoform 1	0	9.967	2	3	4	3	1	1697	193.3	8.12	9.68	3
1034590503	XP_016877641.1	IVD	3712	PREDICTED: isovaleryl-CoA dehydrogenase, mitochondrial isoform X5	0	18.77	11	6	14	6	1	455	49.6	8.15	32.03	6
530369278	XP_005263764.1	IWS1	55677	PREDICTED: protein IWS1 homolog isoform X1	0.004	3.672	1	1	2	1	1	824	92.4	4.69	3.05	1
530378187	XP_005263289.1	JADE1	79960	PREDICTED: protein Jade-1 isoform X1	0	5.322	2	1	1	1	1	842	95.5	7.91	2.83	1
7662006	NP_055550.1	JADE3	9767	protein Jade-3	0	10.507	4	3	7	3	1	823	93.7	7.18	22.05	3
190014601	NP_115881.3	JAGN1	84522	protein jagunal homolog 1	0	8.862	7	1	4	1	1	183	21.1	9.73	13.86	1
125988395	NP_001074930.1	JMJD6	23210	bifunctional arginine demethylase and lysyl-hydroxylase JMJD6 isoform 1	0	7.096	6	2	4	2	1	414	47.6	8.73	11.33	2
289547556	NP_689618.4	JMY	133746	junction-mediating and -regulatory protein	0	11.519	5	3	5	3	1	988	111.4	6.18	17.75	3
5729889	NP_006685.1	JTB	10899	protein JTB precursor	0.002	4.802	9	1	2	1	1	146	16.3	8.28	5.89	1
4758616	NP_002219.1	JUN	3725	transcription factor AP-1	0.002	5.22	9	1	4	1	1	331	35.7	8.76	3.62	1
102469037	NP_005345.3	JUND	3727	transcription factor jun-D isoform JunD-FL	0	8.596	14	2	6	2	1	347	35.2	7.37	12.12	2	Acetyl [N-Term]
1034599574	XP_016880078.1	JUP	3728	PREDICTED: junction plakoglobin isoform X1	0	6.459	4	2	3	2	1	762	83.6	6.29	9.75	2
32698714	NP_056258.1	KANSL1	284058	KAT8 regulatory NSL complex subunit 1 isoform 1	0	9.879	3	2	8	2	1	1105	120.9	8.75	30.95	2
154426300	NP_060292.3	KANSL2	54934	KAT8 regulatory NSL complex subunit 2	0	10.843	5	2	5	2	1	492	55	6.62	20.03	2
767918820	XP_011509762.1	KANSL3	55683	PREDICTED: KAT8 regulatory NSL complex subunit 3 isoform X7	0	26.032	10	6	10	6	1	891	94.7	9.31	32.22	6
194272210	NP_001123561.1	KARS	3735	lysine--tRNA ligase isoform 1	0	101.995	36	21	170	21	1	625	71.5	6.81	559.28	21
578830711	XP_006721880.1	KAT2A	2648	PREDICTED: histone acetyltransferase KAT2A isoform X1	0	12.705	4	3	5	3	1	838	94	9.04	13.48	3
36287069	NP_874369.1	KAT5	10524	histone acetyltransferase KAT5 isoform 1	0.004	3.877	2	1	1	1	1	546	61.8	8.57	2.38	1
5901962	NP_008998.1	KAT7	11143	histone acetyltransferase KAT7 isoform 1	0	15.936	9	4	7	4	1	611	70.6	8.85	13.63	4
5901990	NP_008975.1	KATNA1	11104	katanin p60 ATPase-containing subunit A1 isoform 1	0	19.866	14	6	9	6	1	491	55.9	6.9	23.99	6
1034593374	XP_016878350.1	KATNB1	10300	PREDICTED: katanin p80 WD40 repeat-containing subunit B1 isoform X2	0	23.158	8	4	8	4	1	672	74	7.43	25.66	4
1034591849	XP_016878061.1	KATNBL1	79768	PREDICTED: KATNB1-like protein 1 isoform X1	0.006	3.394	7	1	1	1	1	304	34.7	9.04	1.85	1
973353044	NP_001305645.1	KBTBD4	55709	kelch repeat and BTB domain-containing protein 4 isoform c	0.083	1.077	4	1	3	1	1	567	63.5	6.01	10.37	1
578803012	XP_006712115.1	KCMF1	56888	PREDICTED: E3 ubiquitin-protein ligase KCMF1 isoform X2	0.012	2.469	3	1	1	1	1	389	42.8	5.24	2.28	1
767906482	XP_011540623.1	KCNAB2	8514	PREDICTED: voltage-gated potassium channel subunit beta-2 isoform X3	0	7.209	5	2	10	2	1	395	43.5	8.54	17.24	2	Acetyl [N-Term]
19923973	NP_612453.1	KCTD12	115207	BTB/POZ domain-containing protein KCTD12	0.002	5.227	4	1	3	1	1	325	35.7	5.64	11.68	1
39753959	NP_060104.2	KCTD9	54793	BTB/POZ domain-containing protein KCTD9	0	6.515	6	2	3	2	1	389	42.5	6.37	8.1	2
153218487	NP_714916.3	KDELC2	143888	KDEL motif-containing protein 2 precursor	0.019	2.032	4	1	1	1	1	507	58.5	8.24	2.16	1
58761544	NP_001009999.1	KDM1A	23028	lysine-specific histone demethylase 1A isoform a	0	56.025	19	10	56	10	1	876	95.1	6.25	147.57	10
16306580	NP_036440.1	KDM2A	22992	lysine-specific demethylase 2A isoform a	0	46.193	11	10	28	10	1	1162	132.7	7.58	86.6	10	Acetyl [N-Term]
767975627	XP_011537169.1	KDM2B	84678	PREDICTED: lysine-specific demethylase 2B isoform X1	0.002	4.854	1	1	1	1	1	1353	154.4	8.5	3.75	1
38372909	NP_057688.2	KDM3B	51780	lysine-specific demethylase 3B	0	64.473	10	11	36	11	1	1761	191.5	7.18	124.04	11
98986459	NP_055478.2	KDM4A	9682	lysine-specific demethylase 4A	0.004	4.119	1	1	1	1	1	1064	120.6	5.85	3.02	1
578833096	XP_005259578.2	KDM4B	23030	PREDICTED: lysine-specific demethylase 4B isoform X1	0.003	4.644	2	1	3	1	1	1130	126	7.34	10.53	1
110618244	NP_001036068.1	KDM5A	5927	lysine-specific demethylase 5A	0.016	2.226	1	1	1	1	1	1690	192	6.49	2.12	1
109255243	NP_004178.2	KDM5C	8242	lysine-specific demethylase 5C isoform 1	0.002	4.843	1	1	4	1	1	1560	175.6	5.58	12.73	1
4503817	NP_002026.1	KDSR	2531	3-ketodihydrosphingosine reductase precursor	0	10.696	9	2	5	2	1	332	36.2	7.12	20.08	2
530415398	XP_005260230.1	KEAP1	9817	PREDICTED: kelch-like ECH-associated protein 1 isoform X1	0	20.734	14	6	12	6	1	624	69.6	6.44	36.68	6
5730027	NP_006550.1	KHDRBS1	10657	KH domain-containing, RNA-binding, signal transduction-associated protein 1 isoform 1	0	66.27	24	11	68	11	1	443	48.2	8.66	250.87	11
154355000	NP_003676.2	KHSRP	8570	far upstream element-binding protein 2	0	192.457	50	31	335	27	1	711	73.1	7.3	1247.36	31
57242774	NP_055495.2	KIAA0100	9703	protein KIAA0100 isoform 1 precursor	0.007	3.204	0	1	47	1	1	2235	253.5	7.14	97.04	1
7661906	NP_055551.1	KIAA0101	9768	PCNA-associated factor isoform 1	0	14.205	49	4	8	4	1	111	12	9.83	26.56	4
122937211	NP_001073867.1	KIAA0368	23392	proteasome-associated protein ECM29 homolog	0	64.398	9	14	50	14	1	2017	223.6	8.75	106.95	14
530404977	XP_005268294.1	KIAA0391	9692	PREDICTED: mitochondrial ribonuclease P protein 3 isoform X1	0	5.255	3	1	2	1	1	583	67.3	8.78	8.89	1
530409423	XP_005255761.1	KIAA0430	9665	PREDICTED: meiosis arrest female protein 1 isoform X1	0.002	4.941	1	1	2	1	1	1743	192.8	7.87	7.91	1
55741675	NP_055764.2	KIAA0907	22889	UPF0469 protein KIAA0907	0.014	2.355	1	1	2	1	1	614	64.8	8.73	2.9	1
767931491	XP_011530082.1	KIAA0922	23240	PREDICTED: transmembrane protein 131-like isoform X1	0.002	5.073	1	1	2	1	1	1639	182.6	6.73	7.23	1
651167283	NP_001280569.1	KIAA1033	23325	WASH complex subunit 7 isoform 1	0	5.618	1	1	3	1	1	1174	136.4	7.44	11.3	1
33468965	NP_065747.1	KIAA1143	57456	uncharacterized protein KIAA1143 isoform 1	0	18.491	16	3	11	3	1	154	17.5	6.11	31.63	3
24308113	NP_056449.1	KIAA1279	26128	KIF1-binding protein	0	14.745	8	4	15	4	1	621	71.8	5.49	59.47	4
33946282	NP_056311.2	KIAA1429	25962	protein virilizer homolog isoform 1	0	13.15	3	3	5	3	1	1812	201.9	5.01	14.67	3
190194355	NP_065941.2	KIAA1524	57650	protein CIP2A	0	10.693	3	2	4	2	1	905	102.1	6.23	14.81	2
1034580323	XP_016875039.1	KIAA1551	55196	PREDICTED: uncharacterized protein KIAA1551 isoform X1	0	8.995	2	2	3	2	1	1747	194.7	8.78	6.43	2
756761773	NP_001291937.1	KIAA1715	80856	protein lunapark isoform 1 precursor	0	7.053	7	2	3	2	1	494	54.8	5.07	10.61	2
530360711	XP_005263588.1	KIAA2013	90231	PREDICTED: uncharacterized protein KIAA2013 isoform X1	0	7.498	4	2	3	2	1	667	72.6	8.84	9.77	2
13699824	NP_004514.2	KIF11	3832	kinesin-like protein KIF11	0	95.379	19	20	85	20	1	1056	119.1	5.64	318.22	20
767950710	XP_011542759.1	KIF13B	23303	PREDICTED: kinesin-like protein KIF13B isoform X1	0	9.596	2	2	3	2	1	1847	205.1	5.86	12.46	2
767911126	XP_011508533.1	KIF14	9928	PREDICTED: kinesin-like protein KIF14 isoform X1	0.009	2.73	1	1	1	1	1	1648	186.4	7.91	2.69	1
1034634637	XP_016862373.1	KIF15	56992	PREDICTED: kinesin-like protein KIF15 isoform X1	0	103.663	17	19	64	19	1	1411	162.8	5.97	233.27	19
767993707	XP_011522687.1	KIF18B	146909	PREDICTED: kinesin-like protein KIF18B isoform X1	0.009	2.716	1	1	2	1	1	873	95.1	8.69	3.88	1
1034614794	XP_016859872.1	KIF1A	547	PREDICTED: kinesin-like protein KIF1A isoform X1	0.002	4.926	1	1	1	1	1	1825	205.7	5.47	2.51	1
5032013	NP_005724.1	KIF20A	10112	kinesin-like protein KIF20A	0	12.127	3	2	4	2	1	890	100.2	6.92	19	2
546231677	NP_001271188.1	KIF20B	9585	kinesin-like protein KIF20B isoform 1	0	10.935	2	3	4	3	1	1820	210.5	5.67	9.9	3
6453818	NP_015556.1	KIF22	3835	kinesin-like protein KIF22 isoform 1	0	51.417	22	11	37	11	1	665	73.2	9.45	153.26	11
530406711	XP_005254853.1	KIF23	9493	PREDICTED: kinesin-like protein KIF23 isoform X1	0	23.733	8	6	10	6	1	974	111.6	8.5	30.33	6
767957863	XP_011517151.1	KIF27	55582	PREDICTED: kinesin-like protein KIF27 isoform X1	0.044	1.534	1	1	1	1	1	1427	163.1	7.3	2.9	1
148612849	NP_001091981.1	KIF2A	3796	kinesin-like protein KIF2A isoform 2	0	71.949	22	13	60	13	1	744	84	6.37	215.74	13
166795250	NP_006836.2	KIF2C	11004	kinesin-like protein KIF2C isoform 1	0	57.955	18	10	45	10	1	725	81.3	7.83	149.19	10
116686122	NP_036442.3	KIF4A	24137	chromosome-associated kinesin KIF4A	0	85.315	19	17	56	17	1	1232	139.8	6.27	197.64	17
4758648	NP_004512.1	KIF5B	3799	kinesin-1 heavy chain	0	165.305	32	28	106	23	1	963	109.6	6.51	423.43	28
4758650	NP_004513.1	KIF5C	3800	kinesin heavy chain isoform 5C	0	36.365	9	7	17	2	1	957	109.4	6.19	48.31	7
1034650163	XP_016866325.1	KIFC1	3833	PREDICTED: kinesin-like protein KIFC1 isoform X1	0	47.423	18	10	54	10	1	674	74	9.13	141.08	10	Acetyl [N-Term]
578818378	XP_006717497.1	KIN	22944	PREDICTED: DNA/RNA-binding protein KIN17 isoform X1	0.006	3.349	2	1	1	1	1	394	45.7	9.06	1.88	1
194306559	NP_001123579.1	KLC1	3831	kinesin light chain 1 isoform 3	0	28.606	10	6	17	3	1	618	69.7	5.88	48.39	6
12383062	NP_073733.1	KLC2	64837	kinesin light chain 2 isoform 1	0	31.131	11	5	19	3	1	622	68.9	7.15	72.56	5
41871960	NP_958931.1	KLC4	89953	kinesin light chain 4 isoform b	0	36.067	15	8	30	5	1	637	70.5	6.34	110.94	8
767977249	XP_011533214.1	KLF12	11278	PREDICTED: Krueppel-like factor 12 isoform X6	0.004	4.041	6	2	5	2	1	383	41.8	9.44	11.06	2	Acetyl [N-Term]
37693995	NP_057079.2	KLF13	51621	Krueppel-like factor 13 isoform 1	0	6.338	6	1	5	1	1	288	31.2	9.54	18.17	1
578829010	XP_006721266.1	KLHDC4	54758	PREDICTED: kelch domain-containing protein 4 isoform X1	0	8.123	5	2	3	2	1	525	58.5	5.8	9.54	2
578813566	XP_006715816.1	KLHL7	55975	PREDICTED: kelch-like protein 7 isoform X1	0.003	4.398	3	1	2	1	1	599	67.3	6.14	6.35	1
767970167	XP_011541131.1	KMT2A	4297	PREDICTED: histone-lysine N-methyltransferase 2A isoform X1	0	26.976	2	6	10	6	1	4005	435.7	9.09	30.68	6
7662046	NP_055542.1	KMT2B	9757	histone-lysine N-methyltransferase 2B	0	13.403	2	2	4	2	1	2715	293.3	8.22	12.99	2
767975392	XP_011537072.1	KMT2D	8085	PREDICTED: histone-lysine N-methyltransferase 2D isoform X1	0	18.252	1	4	5	4	1	5556	595.2	5.58	17.5	4
767948259	XP_011514702.1	KMT2E	55904	PREDICTED: histone-lysine N-methyltransferase 2E isoform X1	0.004	3.591	1	1	1	1	1	1858	204.8	7.61	2.21	1
31543169	NP_116090.2	KMT5C	84787	histone-lysine N-methyltransferase KMT5C	0	9.496	5	1	6	1	1	462	52.1	9.83	21.61	1
767988568	XP_011544157.1	KNOP1	400506	PREDICTED: lysine-rich nucleolar protein 1 isoform X1	0	30.781	17	6	14	6	1	518	57.7	9.92	53.32	6
218505827	NP_150628.3	KNSTRN	90417	small kinetochore-associated protein isoform a	0	15.113	11	2	8	2	1	316	35.4	6.3	30	2
7661960	NP_055523.1	KNTC1	9735	kinetochore-associated protein 1	0	5.967	1	1	4	1	1	2209	250.6	5.97	17.99	1
222144293	NP_002255.3	KPNA1	3836	importin subunit alpha-5	0	26.49	14	5	22	3	1	538	60.2	5.01	80.32	5
[truncated: 2,817 more rows]
