# Supplementary material for: The Proteomic Landscape of Resting and Activated CD4+ T Cells Reveal Insights into Cell Differentiation and Function
Source: Int J Mol Sci. 2020 Dec 29;22(1):275. doi: 10.3390/ijms22010275 (PMC7795831; doi:10.3390/ijms22010275)
Supplement: Supplementary file 1 [file ijms-22-00275-s001.zip › Supplementary_table_5.xlsx]

## Sheet: Table5
Supplementary Table 5. Comparison of current human CD4+ T-cell proteomics dataset with mouse CD4+ Tcell proteomics data (Howden et al)
GS	Mouse_Naïve _CD4+_R1	Mouse_Naïve _CD4+__R2	Mouse_Naïve _CD4+__R3	Mouse_TH1_R1	Mouse_TH1_R2	Mouse_TH1_R3	Mouse_CD4+_TCR_R1	Mouse_CD4+_TCR_R2	Mouse_CD4+_TCR_R3	Human_Naïve _CD4+_D1_R1	Human_Naïve _CD4+__D1_R2	Human_Naïve _CD4+__D1_R3	Human_Naïve _CD4+__D2_R1	Human_Naïve _CD4+__D2_R2	Human_Naïve _CD4+__D2_R3	Human_Activated_CD4+__D1_R1	Human_Activated_CD4+_D1_R2	Human_Activated_CD4+_D1_R3	Human_Activated_CD4+_D2_R1	Human_Activated_CD4+_D2_R2	Human_Activated_CD4+_D2_R3
AAAS	0.281809	0.274075	0.273764	0.179355	0.192125	0.183776	0.157219	0.144139	0.15274	0.102279	0.0831093	0.0718615	-0.0500767	-0.0302252	0.0509739	0.162456	0.0357542	0.109087	0.182534	0.202262	0.154894
AACS	0.265602	0.260076	0.253773	0.380095	0.379002	0.381237	0.312412	0.287951	0.302585	NA	NA	NA	NA	NA	NA	NA	NA	NA	NA	NA	NA
AAGAB	0.0594713	0.0649712	0.0736047	0.259268	0.297932	0.273133	0.0962763	0.0906334	0.087694	NA	NA	NA	NA	NA	NA	NA	NA	NA	NA	NA	NA
AAK1	0.401301	0.39053	0.398698	0.279779	0.281348	0.279668	0.312753	0.317919	0.314201	0.409255	0.397713	0.401186	0.38033	0.410337	0.417697	0.273228	0.276355	0.311498	0.271277	0.254546	0.238461
AAMDC	0.0342323	0.059988	0.0560338	0.0304121	0.0372864	0.0371931	-1.26198	-1.26198	-1.26198	NA	NA	NA	NA	NA	NA	NA	NA	NA	NA	NA	NA
AAMP	0.212319	0.214099	0.211833	0.218458	0.20854	0.211562	0.380476	0.378449	0.374543	0.0247069	0.0325797	0.0421048	0.0532786	0.153225	0.135579	0.127994	0.201362	0.19586	0.100491	0.13939	0.130786
AAR2	0.114826	0.107339	0.107495	0.135819	0.124895	0.127892	0.24485	0.242391	0.229893	-0.468452	-0.667854	-0.246801	-0.0278853	-0.460158	-0.0583453	-0.0543945	0.0327264	-0.00116556	0.202581	0.109087	0.171485
AARS1	0.361752	0.354812	0.3567	0.48738	0.479473	0.485646	0.488226	0.488226	0.526086	NA	NA	NA	NA	NA	NA	NA	NA	NA	NA	NA	NA
AARS2	0.0760555	0.0692193	0.0677347	0.0174943	0.0319069	0.0170108	0.153436	0.142918	0.143581	0.0628859	0.0321772	-0.865469	0.101873	0.137527	0.125519	0.274251	0.221327	0.160869	0.118378	0.0846639	0.0698262
AARSD1	0.29736	0.297091	0.295959	0.362996	0.363934	0.366156	0.400497	0.401992	0.41566	0.0703768	-0.0243061	-0.668329	-0.669729	-0.556914	-1.26189	0.137336	0.144126	0.0778044	0.133614	0.195046	0.136816
AASDHPPT	0.201271	0.199266	0.199961	0.0936093	0.087694	0.0859251	0.168647	0.166788	0.166101	0.235125	0.203559	0.198644	0.254189	0.138685	0.205406	0.092497	0.138161	-0.0583453	0.193713	0.177703	0.204742
AATF	0.327051	0.325078	0.322292	0.320657	0.323317	0.313522	0.36907	0.352654	0.342128	0.139777	0.130564	0.141011	0.103757	0.0180926	0.0722935	0.18351	0.167035	0.223703	0.144202	0.186524	0.187314
ABCA2	-0.645906	-0.571117	-0.650961	-1.26186	-1.26185	-1.26185	-1.26198	-1.26198	-1.26198	NA	NA	NA	NA	NA	NA	NA	NA	NA	NA	NA	NA
ABCA3	-0.465194	-0.458546	-0.452099	-1.26197	-1.26197	-1.26197	-0.662328	-0.663046	-0.681247	NA	NA	NA	NA	NA	NA	NA	NA	NA	NA	NA	NA
ABCA7	-0.0536562	-0.0532639	-0.0451456	-0.453925	-0.356238	-0.359685	-0.969751	-1.17976	-1.16524	NA	NA	NA	NA	NA	NA	NA	NA	NA	NA	NA	NA
ABCB1	0.0458423	0.0408568	0.0446154	0.00644091	0.0118007	-0.00903807	0.148898	0.111997	0.105192	NA	NA	NA	NA	NA	NA	NA	NA	NA	NA	NA	NA
ABCB10	-1.26197	-1.26197	-1.26197	-0.857082	-0.682869	-0.664169	-1.26191	-1.2619	-1.26189	NA	NA	NA	NA	NA	NA	NA	NA	NA	NA	NA	NA
ABCB11	-1.26185	-1.26185	-1.26185	-1.26194	-1.26193	-1.26194	-1.26198	-1.26198	-1.26198	NA	NA	NA	NA	NA	NA	NA	NA	NA	NA	NA	NA
ABCB6	-0.676957	-0.856778	-0.874112	-0.547982	-0.447509	-0.470068	-0.066212	-0.149812	-0.156624	NA	NA	NA	NA	NA	NA	NA	NA	NA	NA	NA	NA
ABCB7	0.311841	0.312625	0.310262	0.150112	0.155577	0.153756	0.284657	0.285653	0.290573	0.205406	0.163862	0.236375	0.214758	0.301764	0.282933	0.180706	0.205406	0.188458	0.189381	0.0911659	0.122317
ABCB8	0.0859251	0.0833416	0.0810221	-0.0421586	-0.0310215	-0.0300429	0.033902	0.0188942	0.0254612	NA	NA	NA	NA	NA	NA	NA	NA	NA	NA	NA	NA
ABCC1	-0.0147198	-0.0168355	-0.0164382	0.121603	0.118678	0.117653	0.152519	0.153993	0.156676	0.279895	0.161507	0.265725	0.067093	-0.450711	0.274109	0.32011	0.343968	0.333473	0.160768	0.104069	0.134428
ABCC4	0.033827	0.0330029	0.0349103	-0.0203187	-0.0243467	-0.0348217	-0.00956132	-0.0114602	-0.0138899	NA	NA	NA	NA	NA	NA	NA	NA	NA	NA	NA	NA
ABCC5	-1.26186	-1.26186	-1.26186	-1.262	-1.262	-1.262	-0.0516166	-0.151807	-0.0597262	NA	NA	NA	NA	NA	NA	NA	NA	NA	NA	NA	NA
ABCD1	0.226065	0.217591	0.224381	0.210841	0.205498	0.20755	0.107495	0.0983272	0.104603	NA	NA	NA	NA	NA	NA	NA	NA	NA	NA	NA	NA
ABCD3	0.182692	0.18585	0.181575	0.11061	0.10908	0.108718	0.218922	0.210639	0.210686	-1.26195	-1.26195	0.18991	0.106367	0.0307752	0.0931855	0.0405352	0.324836	0.140455	0.247903	0.203397	0.248381
ABCD4	0.0188024	0.00659233	0.00241868	-1.26192	-1.26192	-1.26193	-0.874112	-0.959127	-1.06884	NA	NA	NA	NA	NA	NA	NA	NA	NA	NA	NA	NA
ABCE1	0.569416	0.552343	0.549963	0.492095	0.469596	0.478553	0.545632	0.5364	0.533722	0.401404	0.402868	0.40241	0.43677	0.402036	0.388523	0.410038	0.414195	0.394661	0.414777	0.421387	0.410662
ABCF1	0.406226	0.40893	0.413048	0.455137	0.466757	0.460587	0.493791	0.48298	0.47779	0.354026	0.389402	0.3707	0.426794	0.388107	0.450634	0.415743	0.357317	0.383571	0.381921	0.408803	0.434966
ABCF2	0.379354	0.377245	0.376176	0.461207	0.465191	0.45871	0.548555	0.534321	0.530478	0.222285	0.249055	0.189462	0.251355	0.264249	0.220568	0.346002	0.434433	0.3982	0.442266	0.419365	0.429349
ABCF3	0.309855	0.306636	0.308824	0.211562	0.215991	0.210179	0.312063	0.29893	0.292788	0.176138	0.198906	0.173551	0.167556	0.174344	0.159704	0.240576	0.215604	0.29406	0.274778	0.324836	0.310571
ABCG1	0.035793	0.0414689	0.0440232	-0.656973	-0.959064	-0.658227	-1.26185	-1.26187	-1.26185	NA	NA	NA	NA	NA	NA	NA	NA	NA	NA	NA	NA
ABCG2	0.254117	0.253535	0.258015	0.0809639	0.0693813	0.0768844	0.0699152	0.0717987	0.0647346	NA	NA	NA	NA	NA	NA	NA	NA	NA	NA	NA	NA
ABHD10	0.186402	0.178545	0.178732	0.0925602	0.0890333	0.0914615	0.079877	0.0741024	0.0758782	0.346544	0.331983	0.368398	0.311997	0.332127	0.301764	0.286932	0.298661	0.287416	0.229325	0.251143	0.240388
ABHD11	0.109175	0.129054	0.140303	0.119378	0.105356	0.108875	0.223805	0.210004	0.193845	-0.0013201	-0.452811	0.036836	-1.26194	-0.254109	-1.26189	-1.26195	-1.26193	-1.26194	0.0288265	-1.26189	-1.26191
ABHD12	0.273036	0.2785	0.266748	0.224297	0.218847	0.229893	0.22567	0.221026	0.232757	0.0262086	0.0652682	0.0965986	-0.157091	0.0421048	0.0866426	-0.0153417	-0.00501924	-0.249075	-1.26192	-1.26189	-1.26191
ABHD13	-1.26197	-1.26197	-1.26197	-1.26185	-1.26186	-1.26184	-0.963332	-1.00587	-1.26183	NA	NA	NA	NA	NA	NA	NA	NA	NA	NA	NA	NA
ABHD14A	-1.26197	-1.26197	-1.26197	-0.0049375	0.00512001	0.000824615	0.0121947	0.0226947	0.0250588	NA	NA	NA	NA	NA	NA	NA	NA	NA	NA	NA	NA
ABHD14B	-0.44766	-0.0349538	-0.767374	-0.0306383	0.00049193	-0.0244949	0.101729	0.119821	0.0896432	0.546816	0.559823	0.561901	0.612002	0.506958	0.486872	0.513222	0.507336	0.512711	0.454	0.460213	0.379533
ABHD15	0.112715	0.10526	0.101097	-1.262	-1.262	-1.262	-0.0369195	-0.0313291	-0.160902	NA	NA	NA	NA	NA	NA	NA	NA	NA	NA	NA	NA
ABHD16A	0.231011	0.226468	0.225594	0.190557	0.203553	0.196823	0.153756	0.147853	0.151959	-1.26195	-1.26195	-1.26195	0.0745479	0.0245725	-1.26189	-1.26195	-1.26193	-1.26194	-1.26192	-1.26189	-1.26191
ABHD17A	0.155181	0.152589	0.163151	0.0203299	0.0134274	0.0152939	0.0594713	0.0787908	0.0614715	NA	NA	NA	NA	NA	NA	NA	NA	NA	NA	NA	NA
ABHD17B	0.126516	0.134696	0.127615	0.218372	0.209698	0.219287	0.0971779	0.0828707	0.0921322	NA	NA	NA	NA	NA	NA	NA	NA	NA	NA	NA	NA
ABHD17C	-0.00846905	-0.0147198	-0.0027033	-1.262	-1.262	-1.262	-0.0675774	-0.050657	-0.0610358	NA	NA	NA	NA	NA	NA	NA	NA	NA	NA	NA	NA
ABHD2	-0.513312	-0.48357	-0.646668	-1.26197	-1.26197	-1.26196	0.0599018	0.0205734	-0.00444058	NA	NA	NA	NA	NA	NA	NA	NA	NA	NA	NA	NA
ABHD5	-1.26197	-1.26197	-1.26197	0.00453753	-0.0214041	-0.00246016	-1.26198	-1.26198	-1.26198	NA	NA	NA	NA	NA	NA	NA	NA	NA	NA	NA	NA
ABHD6	0.196933	0.187095	0.196598	0.00832742	0.00413964	0.0075514	-0.0268738	-0.0451456	-0.0502184	NA	NA	NA	NA	NA	NA	NA	NA	NA	NA	NA	NA
ABI1	0.363239	0.360963	0.360963	0.316902	0.30424	0.311841	0.298298	0.291292	0.296671	0.314019	0.315017	0.301362	0.3135	0.286251	0.29657	0.256298	0.274109	0.22751	0.128532	0.0904089	0.169839
ABI2	-0.681777	-0.659953	-0.658935	0.0497963	0.0381021	0.0471195	0.0058447	0.0134906	0.021377	NA	NA	NA	NA	NA	NA	NA	NA	NA	NA	NA	NA
ABI3	0.125613	0.128903	0.127959	0.221798	0.234671	0.229695	0.276396	0.278653	0.286129	0.18899	0.176034	0.157404	0.175683	0.123179	0.130019	0.129594	0.0699747	-0.450461	0.127574	0.168513	0.18957
ABITRAM	0.292877	0.294736	0.291928	0.223805	0.23731	0.22814	0.320077	0.325468	0.324006	NA	NA	NA	NA	NA	NA	NA	NA	NA	NA	NA	NA
ABL1	0.0442342	0.0362653	0.0407133	-1.26193	-1.26193	-1.26193	-0.642513	-0.450903	-0.261543	NA	NA	NA	NA	NA	NA	NA	NA	NA	NA	NA	NA
ABL2	-0.015294	-0.0193726	-0.0288438	-1.26195	-1.26194	-1.26194	-0.00808369	-0.012086	0.0129925	NA	NA	NA	NA	NA	NA	NA	NA	NA	NA	NA	NA
ABLIM1	0.261263	0.330356	0.346187	0.210179	0.209199	0.214537	0.290247	0.316998	0.317744	0.336221	0.341153	0.346871	0.325111	0.317858	0.347231	0.217068	0.209279	0.214136	0.0512916	0.108405	0.117484
ABR	0.287549	0.277883	0.286129	0.242741	0.245376	0.25085	0.148021	0.138972	0.135703	0.103554	0.0827798	0.122317	0.0941378	0.166263	0.0919368	-0.258732	-0.157091	0.0816939	0.102471	0.054053	0.156317
ABRACL	0.891375	0.837841	0.7592	0.875774	0.949418	0.910532	0.604961	0.624864	0.620423	0.603531	0.593349	0.58917	0.485054	0.367154	0.36387	0.537771	0.925831	0.67248	0.683881	0.606869	0.635232
ABRAXAS1	0.287003	0.282254	0.288664	0.185076	0.174744	0.181454	0.211389	0.213465	0.214398	0.0650504	0.03122	0.0993742	0.0233938	0.0874754	0.109681	-0.281449	0.00745965	-0.0603207	-0.0637164	0.0384133	-5.03204e-06
ABRAXAS2	0.274663	0.270401	0.27354	0.240398	0.222203	0.236547	0.217785	0.210603	0.222116	0.194373	0.215288	0.226839	0.271785	0.260013	0.199791	0.19293	0.20453	0.185381	0.100223	0.147086	0.073484
ABT1	0.215358	0.214398	0.210414	0.20329	0.20052	0.20236	0.300486	0.301399	0.313963	-0.666654	0.180543	0.162586	0.0514307	-0.0281404	0.150503	0.0553574	0.0795517	-0.681345	-0.0133305	0.013887	0.0419434
ABTB2	-0.0306383	-0.042501	-0.0411194	-0.0764634	-0.149812	-0.241203	0.0413782	0.0547922	0.0606372	NA	NA	NA	NA	NA	NA	NA	NA	NA	NA	NA	NA
AC002316.1	-0.655665	-0.656403	-0.856375	-1.262	-1.262	-1.262	-1.26192	-1.26192	-1.26192	NA	NA	NA	NA	NA	NA	NA	NA	NA	NA	NA	NA
AC005702.1	0.237383	0.229597	0.229695	0.180737	0.164696	0.180403	0.171163	0.175665	0.171983	NA	NA	NA	NA	NA	NA	NA	NA	NA	NA	NA	NA
AC005747.1	-1.26197	-1.26197	-1.26197	-1.26197	-1.26197	-1.26197	-1.26198	-1.26198	-1.26198	NA	NA	NA	NA	NA	NA	NA	NA	NA	NA	NA	NA
AC008758.6	0.177434	0.165359	0.164633	0.100025	0.0988467	0.10475	0.00982978	0.0223577	0.0173204	NA	NA	NA	NA	NA	NA	NA	NA	NA	NA	NA	NA
AC010132.3	0.835154	0.826132	0.822048	0.800178	0.84465	0.820396	0.666401	0.655138	0.704009	NA	NA	NA	NA	NA	NA	NA	NA	NA	NA	NA	NA
AC022966.1	0.111178	0.109348	0.124895	0.0870671	0.090173	0.087694	0.248307	0.240263	0.233644	NA	NA	NA	NA	NA	NA	NA	NA	NA	NA	NA	NA
AC090004.1	0.436496	0.43554	0.428567	0.363934	0.364294	0.366695	0.305078	0.295775	0.308208	NA	NA	NA	NA	NA	NA	NA	NA	NA	NA	NA	NA
AC091230.1	0.119169	0.117169	0.119378	0.0878326	0.0903099	0.0898709	-0.0162064	-0.0128338	-0.00379575	NA	NA	NA	NA	NA	NA	NA	NA	NA	NA	NA	NA
AC093012.1	0.27738	0.267016	0.271058	0.214321	0.218555	0.216356	-0.0672698	-0.149321	-0.0159833	NA	NA	NA	NA	NA	NA	NA	NA	NA	NA	NA	NA
AC118549.1	0.04301	0.0432358	0.0410649	0.0128308	0.0132305	0.0154118	-0.0693066	-0.23925	-0.152642	NA	NA	NA	NA	NA	NA	NA	NA	NA	NA	NA	NA
AC139530.2	0.166101	0.162294	0.173517	0.22926	0.23238	0.236138	0.0637917	0.0574419	0.0713923	NA	NA	NA	NA	NA	NA	NA	NA	NA	NA	NA	NA
AC231657.3	0.140963	0.139336	0.133651	0.0752502	0.079275	0.072954	-0.00781148	0.00195996	0.00908346	NA	NA	NA	NA	NA	NA	NA	NA	NA	NA	NA	NA
ACAA1	0.405481	0.434065	0.439872	0.432505	0.446495	0.43516	0.377819	0.373226	0.37482	0.241107	0.23912	0.214041	0.200356	0.159568	0.160638	0.198517	0.204644	0.203559	0.226924	0.097325	0.172277
ACAA2	0.784875	0.851482	0.873879	0.427622	0.430859	0.424489	0.584582	0.590883	0.575056	0.456695	0.433712	0.448381	0.423747	0.43313	0.421134	0.466204	0.417697	0.484273	0.356924	0.363656	0.360502
ACACA	0.109668	0.103498	0.115483	0.231011	0.224654	0.230034	0.27354	0.263266	0.269971	0.335232	0.343724	0.359889	0.295138	0.274109	0.291958	0.293031	0.305612	0.299155	0.495034	0.530208	0.466922
ACACB	-1.26189	-1.26189	-1.26188	-1.26184	-1.26183	-1.07043	-1.26186	-1.26185	-0.969117	NA	NA	NA	NA	NA	NA	NA	NA	NA	NA	NA	NA
ACAD10	0.202631	0.197367	0.200448	-0.857556	-0.862755	-0.961026	0.0202384	0.0262291	0.0277362	NA	NA	NA	NA	NA	NA	NA	NA	NA	NA	NA	NA
ACAD11	0.349117	0.346879	0.34333	0.306122	0.312625	0.303677	0.336776	0.354694	0.355931	NA	NA	NA	NA	NA	NA	NA	NA	NA	NA	NA	NA
ACAD8	0.27809	0.275667	0.269497	0.167448	0.159258	0.160388	0.167868	0.156351	0.161945	0.171033	0.173137	0.183854	0.144299	0.158043	0.173006	0.111806	0.117964	0.092497	-0.00622378	0.0500289	0.0374957
ACAD9	0.425047	0.41485	0.422329	0.256161	0.262221	0.251174	0.325177	0.311167	0.316998	0.235481	0.209091	0.215861	0.246232	0.209177	0.23712	0.229511	0.25937	0.243419	0.261124	0.230577	0.240992
ACADL	0.546669	0.544886	0.539935	0.698352	0.68665	0.739178	0.409704	0.396041	0.414995	NA	NA	NA	NA	NA	NA	NA	NA	NA	NA	NA	NA
ACADM	0.369635	0.389563	0.398541	0.292428	0.304725	0.29084	0.398346	0.386912	0.387931	0.264585	0.305114	0.296726	0.344126	0.323383	0.356307	0.278235	0.299389	0.302975	0.219425	0.281249	0.265991
ACADS	0.532954	0.517704	0.517157	0.338476	0.351746	0.340476	0.414995	0.41168	0.404881	0.279452	0.311009	0.289238	0.300663	0.320239	0.286537	0.291272	0.31257	0.314464	0.216141	0.0509739	0.274703
ACADSB	0.281657	0.277276	0.277523	0.195952	0.206274	0.204437	0.22809	0.224867	0.235828	0.282718	0.282453	0.274507	0.217323	0.234697	0.234269	0.162799	0.0562329	0.176876	0.214368	0.0949723	0.179534
ACADVL	0.499074	0.490152	0.495489	0.330501	0.326555	0.324006	0.410837	0.403257	0.406891	0.427869	0.443958	0.440432	0.406358	0.450912	0.515557	0.427342	0.459886	0.444433	0.474367	0.477313	0.477313
ACAP1	0.466757	0.461003	0.454552	0.381382	0.381777	0.378884	0.302489	0.309127	0.313044	0.450305	0.451185	0.457602	0.450912	0.428624	0.47098	0.430196	0.449783	0.452699	0.367154	0.35332	0.355115
ACAP2	0.316352	0.309535	0.311244	0.182423	0.17229	0.182759	0.233278	0.22388	0.231625	0.273056	0.278667	0.23835	0.290707	0.299105	0.290583	0.114546	0.133101	0.219324	0.0358178	0.0877564	0.0967215
ACAP3	-1.26186	-1.26186	-1.26188	-1.2619	-1.2619	-1.26191	-1.26198	-1.26198	-1.26198	NA	NA	NA	NA	NA	NA	NA	NA	NA	NA	NA	NA
ACAT1	0.406523	0.426392	0.433359	0.402367	0.401016	0.397576	0.49409	0.504608	0.505406	0.423211	0.391006	0.433712	0.455363	0.417952	0.440432	0.445662	0.378309	0.448691	0.551884	0.46519	0.450044
ACAT2	0.312944	0.320858	0.317919	0.436342	0.431021	0.441656	0.340794	0.338777	0.364468	0.388107	0.376453	0.372436	0.329211	0.342306	0.351218	0.458178	0.45937	0.507782	0.435807	0.435504	0.432855
ACBD3	0.296123	0.293513	0.283351	0.298608	0.298608	0.293831	0.360181	0.357333	0.368768	0.162954	0.154894	0.0579072	0.17672	0.167556	0.135682	0.140954	0.182785	0.153852	0.19178	0.134894	0.0400325
ACBD5	0.0614715	0.0710695	0.0695392	0.00399426	0.0172342	0.00795797	-0.00605463	-0.0214041	-0.0263348	NA	NA	NA	NA	NA	NA	NA	NA	NA	NA	NA	NA
ACBD6	-1.26184	-1.26184	-0.968466	0.0770147	0.0635022	0.0672188	0.173177	0.165144	0.182043	NA	NA	NA	NA	NA	NA	NA	NA	NA	NA	NA	NA
ACCS	0.155295	0.145368	0.14388	-0.449047	-0.447975	-0.469269	-0.258422	-0.0601983	-0.0439344	NA	NA	NA	NA	NA	NA	NA	NA	NA	NA	NA	NA
ACD	0.049883	0.0712335	0.076417	0.085371	0.0888585	0.0801511	0.285129	0.297256	0.316444	-1.26195	-1.26195	-1.26195	0.0798991	0.162304	0.162633	0.200456	0.185381	0.190217	-1.26192	-1.26189	-1.26191
ACIN1	0.42127	0.405033	0.4135	0.350802	0.351188	0.349849	0.462301	0.448631	0.438256	0.473729	0.490963	0.490633	0.488493	0.481557	0.465506	0.431074	0.444164	0.441003	0.413219	0.407911	0.404557
ACLY	0.397455	0.391751	0.397576	0.500053	0.497799	0.49949	0.515948	0.520643	0.542766	0.425431	0.401636	0.402238	0.38539	0.426794	0.414478	0.593349	0.452439	0.479941	0.540832	0.537771	0.538972
ACO1	0.326144	0.319756	0.316746	0.310754	0.30705	0.308576	0.323562	0.313963	0.319756	0.296405	0.281329	0.307579	0.320409	0.261243	0.276355	0.208165	0.214869	0.281501	0.128095	0.16141	0.194473
ACO2	0.824608	0.804307	0.807248	0.646579	0.651058	0.648518	0.958489	0.964715	0.972357	0.730545	0.753952	0.739778	0.776112	0.727977	0.706533	0.592639	0.661122	0.778375	0.519149	0.504059	0.476224
ACOT11	0.00206296	-0.00886705	-0.0150568	0.0608498	0.0469901	0.0599018	0.0211249	0.0101183	0.0264333	NA	NA	NA	NA	NA	NA	NA	NA	NA	NA	NA	NA
ACOT13	0.141	0.141873	0.120833	-0.660986	-1.06923	-0.959064	0.0476714	0.0660488	0.072954	0.258162	0.232599	0.253132	0.208254	0.292626	0.280324	0.185906	0.20195	0.194818	0.191934	0.206544	0.228436
ACOT2	0.451349	0.454843	0.460398	0.221353	0.222116	0.218922	0.354547	0.341609	0.339973	-1.26195	-1.26195	-1.26195	-1.26194	-1.26193	-1.26189	0.0372769	-0.457151	-1.26194	-1.26192	-1.26189	-1.26191
ACOT6	-0.681247	-0.868704	-0.860468	-1.262	-1.262	-1.262	-1.26188	-1.26187	-1.26188	NA	NA	NA	NA	NA	NA	NA	NA	NA	NA	NA	NA
ACOT7	0.518282	0.501512	0.500638	0.675672	0.66402	0.664627	0.529458	0.543438	0.544886	-0.462377	0.0490976	0.0159359	0.113194	0.0310252	-0.0109432	0.286829	0.311339	0.316952	0.310571	0.291006	0.291401
ACOT8	0.170033	0.169875	0.16922	0.240263	0.254435	0.240449	0.208368	0.199628	0.21572	-0.445454	-0.053965	-1.26195	-1.26194	-1.26193	-1.26189	-1.26195	-1.26193	-1.26194	-1.26192	-1.26189	-1.26191
ACOT9	0.484515	0.484209	0.475046	0.362046	0.358649	0.358649	0.396041	0.386761	0.403462	0.301362	0.267584	0.266546	0.327106	0.302076	0.285292	0.308593	0.27844	0.289809	0.235994	0.290079	0.300147
ACOX1	-0.16416	-0.0477277	-0.0512126	0.0631308	0.0736854	0.0705964	0.00413964	0.0155169	0.0324275	-0.048564	0.0573054	0.0950868	-1.26194	-0.0503238	-1.26189	0.155703	0.220223	0.222285	0.128964	-0.0598761	0.0784257
ACOX3	0.2367	0.227337	0.23023	0.0771037	0.0855727	0.0750055	0.152337	0.137486	0.148021	0.0890591	0.110669	-0.0271333	0.276355	0.167217	0.202315	0.170139	0.103044	0.203248	-1.26192	-1.26189	-1.26191
ACP1	0.258474	0.292704	0.291115	0.446831	0.468	0.44937	0.325673	0.349117	0.349982	0.37264	0.370012	0.385649	0.385649	0.358929	0.384891	0.289144	0.289064	0.287067	0.321438	0.295895	0.290414
ACP2	-1.26197	-1.26197	-1.26197	-1.26183	-0.970219	-0.963332	-1.26198	-1.26198	-1.26198	NA	NA	NA	NA	NA	NA	NA	NA	NA	NA	NA	NA
ACP5	0.239357	0.254274	0.246003	0.367507	0.371107	0.373075	0.0256678	0.0204323	0.015883	NA	NA	NA	NA	NA	NA	NA	NA	NA	NA	NA	NA
ACP6	0.342128	0.334484	0.337769	-0.0164382	-0.027181	-0.0140274	0.138267	0.132844	0.135819	NA	NA	NA	NA	NA	NA	NA	NA	NA	NA	NA	NA
ACSF2	0.371832	0.360847	0.359933	0.13884	0.123219	0.126705	0.17065	0.162352	0.163565	0.0195155	0.00511633	0.0325797	-0.0200536	-0.465579	-1.26189	-0.858488	-0.359333	-0.648861	-1.26192	-0.00266512	-0.0679018
ACSF3	0.100228	0.0920273	0.0982586	0.112228	0.115552	0.109627	0.136453	0.130064	0.145073	0.261243	0.27065	0.283111	0.280184	0.256838	0.245313	0.166095	0.224153	0.222152	0.128847	0.130958	0.153727
ACSL1	0.127892	0.113957	0.119108	0.0346493	0.033596	0.033902	0.0956013	0.0876275	0.0924823	-1.26195	-1.26195	-0.0367588	-1.26194	-1.26193	-1.26189	-1.26195	-0.0131798	0.0445189	-1.26192	-1.26189	-1.26191
ACSL3	0.0929458	0.0882111	0.0890819	0.130823	0.128491	0.126647	0.0925602	0.087694	0.0941664	0.103328	0.142575	0.085344	0.171994	0.158187	0.0865168	0.139004	0.157499	0.12469	0.0081399	0.0545653	0.072182
ACSL4	0.20236	0.202287	0.198678	0.449709	0.436496	0.446663	0.360509	0.376444	0.396041	0.0153536	0.0393887	0.106145	0.0526871	0.109228	0.0604468	0.233095	0.226327	0.238461	0.202177	0.159757	0.201818
ACSL5	0.318437	0.305181	0.308007	0.28377	0.280688	0.283677	0.29008	0.275667	0.278807	0.0455814	0.0062614	0.100015	0.0397573	-0.261337	0.0534499	0.106545	0.00520209	0.00988436	0.148325	0.121188	0.148878
ACSL6	-1.26183	-1.26184	-1.16508	-1.262	-1.262	-1.262	-1.26187	-1.26189	-1.26187	NA	NA	NA	NA	NA	NA	NA	NA	NA	NA	NA	NA
ACSS1	0.444647	0.435356	0.434295	-0.0175982	-0.0356825	-0.0380293	0.222289	0.224079	0.228862	0.14928	0.170139	0.131389	0.23912	0.19797	0.155703	0.0209414	0.0163785	-0.560395	-1.26192	0.0619151	-1.26191
ACSS2	0.40313	0.395691	0.392058	0.0343583	0.0422981	0.0282316	0.235617	0.24071	0.245376	NA	NA	NA	NA	NA	NA	NA	NA	NA	NA	NA	NA
ACTA1	0.0313984	0.0508738	0.0359716	0.0525249	0.0240835	0.0462193	-0.0604733	-0.0538871	-0.050657	NA	NA	NA	NA	NA	NA	NA	NA	NA	NA	NA	NA
ACTB	9.50932	9.50932	9.50932	17.2986	17.2986	17.2986	17.2986	12.914	17.2986	14.9149	14.9149	14.9149	14.9149	25.7762	25.7762	25.7762	25.7762	25.7762	25.7762	25.7762	25.7762
ACTBL2	0.440725	0.466291	0.479238	0.453614	0.468602	0.454843	0.30736	0.301011	0.300163	0.559535	0.688253	0.374583	0.130786	-1.26193	0.025061	0.316715	0.300147	0.301139	-1.26192	0.0832647	0.365312
ACTC1	0.25233	0.203854	0.257931	0.0651854	0.108046	0.0846594	0.378884	0.391257	0.389338	4.02398	3.09238	3.53767	2.47588	1.9054	2.14293	1.9054	1.833	1.64476	1.26635	1.14515	1.07084
ACTG1	0.702743	0.768169	0.771961	1.10039	1.09692	1.08262	1.32904	1.35028	1.35028	0.20706	0.162456	0.160174	0.240758	0.335959	0.242736	0.123603	0.0825181	0.168409	0.441003	0.399837	0.422726
ACTL6A	0.541002	0.529458	0.524093	0.44008	0.436718	0.438599	0.513619	0.505406	0.494723	0.371968	0.362133	0.375612	0.375236	0.364972	0.371138	0.453273	0.468779	0.448091	0.389566	0.381687	0.331983
ACTN1	1.24526	1.1046	1.17071	0.223076	0.204235	0.205165	0.897796	0.90747	0.89543	0.989888	1.02048	0.939485	0.867083	0.879696	1.13735	0.723656	0.806372	0.708559	0.637392	0.587292	0.612002
ACTN2	0.101239	0.109263	0.101729	-1.26195	-1.26196	-1.26196	0.264333	0.277958	0.290247	NA	NA	NA	NA	NA	NA	NA	NA	NA	NA	NA	NA
ACTN4	1.23711	1.12485	1.17779	0.784875	0.791268	0.787677	0.972357	0.952439	0.969764	1.20268	1.16066	1.16066	0.925831	0.944062	1.09801	0.97971	0.837025	0.952333	1.13735	1.13117	1.17278
ACTR10	0.295679	0.289265	0.286207	0.294736	0.306701	0.301494	0.302942	0.30876	0.313326	0.0372769	0.0778837	0.063314	0.00988436	0.0933638	0.126019	-0.0660236	-0.0345768	-0.0109432	0.0177787	0.0749687	0.0582096
ACTR1A	0.396706	0.390974	0.391257	0.36685	0.36856	0.369499	0.408179	0.410837	0.419182	0.311339	0.270408	0.327847	0.323718	0.293031	0.317097	0.314316	0.354169	0.344448	0.335298	0.32996	0.348626
ACTR1B	0.374543	0.368307	0.354694	0.348336	0.332106	0.350502	0.28247	0.284276	0.306479	0.359815	0.382354	0.391006	0.338628	0.403325	0.432261	0.46452	0.446001	0.465506	0.346871	0.308311	0.297324
ACTR2	0.992066	0.955085	0.969764	0.822048	0.837841	0.839503	0.857431	0.891375	0.867582	0.841908	0.847668	0.867083	0.648521	0.784408	0.753952	0.567578	0.579572	0.543756	0.547379	0.613203	0.575951
ACTR3	1.49732	1.33506	1.37373	1.05697	1.11892	1.07839	0.975992	0.969764	1.01879	1.27565	1.27565	1.2566	1.23073	1.23073	1.30272	1.04051	1.492	1.13117	0.888788	1.07084	0.844619
ACTR5	0.153623	0.177113	0.174313	0.148021	0.142432	0.145691	0.221186	0.223076	0.233716	0.0166702	-0.868597	0.00520209	-0.248755	-0.241323	-1.26189	-0.35713	-1.26193	-1.26194	-1.26192	-1.26189	-1.26191
ACTR6	0.163359	0.164633	0.16457	0.0762597	0.0945026	0.081466	0.124561	0.113343	0.118871	NA	NA	NA	NA	NA	NA	NA	NA	NA	NA	NA	NA
ACTR8	0.187095	0.181078	0.178897	0.144457	0.144076	0.144457	0.129596	0.131926	0.146976	-0.446355	-0.46412	0.020756	-1.26194	-1.26193	-1.26189	-1.26195	0.019343	0.129384	-1.26192	-1.26189	-1.26191
ACVRL1	0.071511	0.0644722	0.0577405	-1.26198	-1.26197	-1.26197	-1.26198	-1.26188	-1.26183	NA	NA	NA	NA	NA	NA	NA	NA	NA	NA	NA	NA
ACY1	0.0825509	0.106453	0.119169	0.220893	0.220231	0.212319	0.355242	0.383199	0.392234	NA	NA	NA	NA	NA	NA	NA	NA	NA	NA	NA	NA
ACYP1	0.380582	0.415815	0.395546	0.290247	0.283023	0.277276	0.213741	0.25233	0.231116	0.148219	0.177255	0.132839	0.103135	0.183854	0.180215	0.0831093	0.0919368	0.0997593	-0.00790481	0.0571809	0.0409631
ADA	0.352125	0.377819	0.381382	0.406647	0.41549	0.422822	0.363239	0.358649	0.356216	0.332456	0.325708	0.362133	0.463807	0.318521	0.297752	0.242219	0.274251	0.274019	0.284818	0.28467	0.308593
ADAL	-0.000756701	0.00950284	0.00568435	-1.26197	-1.26197	-1.26198	-1.26198	-1.26198	-1.26198	NA	NA	NA	NA	NA	NA	NA	NA	NA	NA	NA	NA
ADAM10	0.23544	0.234594	0.237383	0.247278	0.25207	0.248505	0.218847	0.203619	0.202861	0.165074	0.19293	0.159848	0.257766	0.233821	0.215042	0.0560661	0.0926234	0.0276055	0.0938121	0.0514307	0.00109596
ADAM15	-1.26197	-1.26197	-1.26197	-1.26193	-1.26194	-1.26193	-0.670253	-0.472938	-0.453586	NA	NA	NA	NA	NA	NA	NA	NA	NA	NA	NA	NA
ADAM17	0.108974	0.102685	0.10221	0.12113	0.139027	0.128322	0.147971	0.14142	0.146512	NA	NA	NA	NA	NA	NA	NA	NA	NA	NA	NA	NA
ADAM19	-1.26189	-1.26189	-1.26189	0.0250588	0.015883	0.0106929	-1.26198	-1.26198	-1.26198	NA	NA	NA	NA	NA	NA	NA	NA	NA	NA	NA	NA
ADAM8	-1.26197	-1.26197	-1.26197	0.0430978	0.0357533	0.0417277	-1.26198	-1.26198	-1.26198	-1.26195	-1.26195	-1.26195	-1.26194	-1.26193	-1.26189	-1.26195	-0.043319	-0.0185829	-1.26192	-1.26189	-1.26191
ADAM9	-1.26197	-1.26197	-1.26197	0.0325478	0.0321607	0.0349936	-1.26186	-1.26187	-1.26185	NA	NA	NA	NA	NA	NA	NA	NA	NA	NA	NA	NA
ADAP1	0.00453753	0.00724455	0.0135491	0.173979	0.152337	0.169695	0.00288173	-0.0058344	-0.0142342	NA	NA	NA	NA	NA	NA	NA	NA	NA	NA	NA	NA
ADAR	0.275336	0.270784	0.281989	0.21675	0.220571	0.215884	0.266343	0.265204	0.269418	0.492182	0.495034	0.480645	0.549235	0.515557	0.504926	0.584972	0.534811	0.537771	0.449541	0.477691	0.485723
ADARB1	-1.26197	-1.26197	-1.26197	-0.00997671	-0.239752	-0.0376898	-1.26188	-1.26189	-1.26188	0.0722935	0.0830127	0.109535	-0.0388402	0.0562329	0.00394308	0.0731848	0.0521339	0.182686	-1.26192	-1.26189	-1.26191
ADAT1	0.158777	0.154134	0.156273	-0.0562753	-0.0369195	-0.0412831	0.106353	0.0967443	0.105123	NA	NA	NA	NA	NA	NA	NA	NA	NA	NA	NA	NA
ADAT2	0.0821678	0.104063	0.128322	0.127278	0.148396	0.132892	0.18047	0.22302	0.189092	NA	NA	NA	NA	NA	NA	NA	NA	NA	NA	NA	NA
ADAT3	0.0147469	0.0463335	0.0543244	0.0449171	0.048958	0.047317	0.209619	0.207388	0.219503	NA	NA	NA	NA	NA	NA	NA	NA	NA	NA	NA	NA
ADCK1	0.128559	0.134262	0.127499	0.0474067	0.049235	0.0499606	0.106827	0.103828	0.102524	NA	NA	NA	NA	NA	NA	NA	NA	NA	NA	NA	NA
ADCK3	-0.0285793	-0.0208208	-0.0250397	-1.26199	-1.26196	-1.26198	-0.674781	-0.860022	-0.857321	NA	NA	NA	NA	NA	NA	NA	NA	NA	NA	NA	NA
ADCK4	0.136762	0.129714	0.125034	0.0466862	0.0509515	0.0443199	0.0703433	0.0618451	0.0594713	NA	NA	NA	NA	NA	NA	NA	NA	NA	NA	NA	NA
ADCK5	-0.0555819	-0.241974	-0.0610358	-0.76587	-0.653101	-0.659953	-0.0454533	-0.0397779	-0.045723	NA	NA	NA	NA	NA	NA	NA	NA	NA	NA	NA	NA
ADCY2	-1.06514	-0.962737	-0.963332	-1.262	-1.262	-1.262	-1.26198	-1.26198	-1.26198	NA	NA	NA	NA	NA	NA	NA	NA	NA	NA	NA	NA
ADCY3	0.0949445	0.0820503	0.0766228	-1.26197	-1.26196	-1.26197	-1.26198	-1.26198	-1.26198	NA	NA	NA	NA	NA	NA	NA	NA	NA	NA	NA	NA
ADCY6	-1.26183	-1.07117	-1.16512	-1.26199	-1.26199	-1.26199	0.00324149	-0.00846905	-0.00572329	NA	NA	NA	NA	NA	NA	NA	NA	NA	NA	NA	NA
ADCY7	0.0982586	0.0992324	0.0967443	0.0536636	0.0517817	0.0590964	-0.348447	-0.268203	-0.246515	NA	NA	NA	NA	NA	NA	NA	NA	NA	NA	NA	NA
ADD1	0.520643	0.519772	0.507346	0.301102	0.306562	0.308963	0.358992	0.372516	0.364294	0.460496	0.458476	0.456308	0.461729	0.484273	0.50005	0.381687	0.418639	0.366627	0.396404	0.420262	0.439002
ADD3	0.510805	0.49409	0.496494	0.267776	0.262111	0.267452	0.333863	0.335419	0.332106	0.412035	0.406146	0.420491	0.48035	0.425705	0.502435	0.391936	0.41682	0.421387	0.292212	0.333657	0.316024
ADGRE5	0.123077	0.170913	0.184426	0.157871	0.150725	0.149655	0.129054	0.102685	0.091186	NA	NA	NA	NA	NA	NA	NA	NA	NA	NA	NA	NA
ADH1A	0.340106	0.338777	0.332697	-1.262	-1.262	-1.262	-0.015738	-0.0180663	-0.0304246	NA	NA	NA	NA	NA	NA	NA	NA	NA	NA	NA	NA
ADH5	0.601446	0.597121	0.589996	0.450629	0.433359	0.449169	0.46539	0.454337	0.467255	0.609137	0.651117	0.645897	0.676459	0.599417	0.627059	0.637392	0.760923	0.77118	0.505877	0.455961	0.536633
ADI1	0.324813	0.338884	0.330891	0.34132	0.32896	0.327983	0.517704	0.565481	0.576006	-0.453698	-0.0547994	0.0703768	0.00606993	-0.00539679	0.1059	0.101188	0.0736095	0.102559	-1.26192	0.109535	-1.26191
ADIPOR1	-1.26197	-1.26197	-1.26197	-1.262	-1.262	-1.262	-0.859153	-0.661748	-0.652036	NA	NA	NA	NA	NA	NA	NA	NA	NA	NA	NA	NA
ADK	0.543438	0.528876	0.518011	0.379002	0.360291	0.374404	0.372646	0.355161	0.360847	0.286669	0.301764	0.312766	0.298977	0.307933	0.319775	0.212735	0.226578	0.132437	0.208361	0.23498	0.257652
ADNP	0.20086	0.192423	0.199473	0.247503	0.237693	0.241966	0.242045	0.236011	0.229597	0.18498	0.168113	0.16966	0.188721	0.18498	0.204062	0.118909	0.104069	0.151467	0.188321	0.138161	0.111047
ADNP2	-0.0383217	-0.0459286	-0.0405904	-1.26194	-1.26194	-1.26194	-0.356925	-0.066212	-0.148788	NA	NA	NA	NA	NA	NA	NA	NA	NA	NA	NA	NA
ADO	0.376705	0.376569	0.369142	0.33788	0.341045	0.334373	0.256097	0.274018	0.271058	-0.0526441	0.0918417	0.0494291	0.0108857	0.0165138	-1.26189	-0.263383	0.0243744	0.0297239	-0.0135045	0.0335992	-0.0117718
ADPGK	0.29084	0.283589	0.276064	0.228269	0.223163	0.228374	0.226794	0.221601	0.237693	0.133614	0.15196	0.135965	0.241717	0.161758	0.207665	0.251143	0.21236	0.269199	0.138685	0.198207	0.180779
ADPRH	0.284846	0.274018	0.27021	0.466291	0.492095	0.483658	0.357087	0.356548	0.383822	NA	NA	NA	NA	NA	NA	NA	NA	NA	NA	NA	NA
ADPRHL2	0.387456	0.387043	0.382357	0.266956	0.285309	0.270549	0.351383	0.36501	0.375111	0.363171	0.369178	0.378715	0.374373	0.335796	0.343441	0.345152	0.335298	0.352387	0.313786	0.291272	0.275364
ADPRM	0.0522719	-1.26197	-1.26197	0.128418	0.119451	0.127959	0.00166441	-0.00755939	0.00690408	NA	NA	NA	NA	NA	NA	NA	NA	NA	NA	NA	NA
ADRBK1	0.448428	0.441656	0.441301	0.430648	0.429087	0.426059	0.385882	0.387159	0.386471	NA	NA	NA	NA	NA	NA	NA	NA	NA	NA	NA	NA
ADRM1	0.369932	0.363454	0.358912	0.333863	0.345405	0.337679	0.357748	0.380095	0.359593	0.160638	0.209442	0.217512	0.191421	0.246491	0.246604	0.229637	0.250046	0.2212	0.261243	0.241107	0.251038
ADSL	0.6005	0.600976	0.609266	0.509141	0.506135	0.507896	0.630708	0.63474	0.651058	0.417259	0.400766	0.391723	0.428159	0.436413	0.422453	0.508911	0.505877	0.45937	0.473384	0.481557	0.515282
ADSS2	0.531809	0.515948	0.521633	0.552343	0.543968	0.54065	0.656635	0.645366	0.667081	NA	NA	NA	NA	NA	NA	NA	NA	NA	NA	NA	NA
AEBP2	0.00512001	0.0188024	0.00644091	0.15988	0.172835	0.160927	0.216604	0.219417	0.214594	-1.26195	-1.26195	-1.26195	-1.26194	-1.26193	-1.26189	-0.959202	-0.46598	-0.660716	0.0104652	0.0272896	0.00365158
AEN	-0.44977	-0.356458	-0.349489	0.0681506	0.0479645	0.0554847	0.155961	0.131747	0.121988	NA	NA	NA	NA	NA	NA	NA	NA	NA	NA	NA	NA
AES	-1.26197	-1.26197	-1.26197	0.0607858	0.0817965	0.0872875	-0.0475076	0.0594713	-0.0367642	NA	NA	NA	NA	NA	NA	NA	NA	NA	NA	NA	NA
AFDN	-1.26197	-1.26197	-1.26197	-0.350828	-0.244978	-0.449474	-0.350828	-0.245637	-0.1523	-1.26195	-1.26195	-1.26195	-1.26194	-1.26193	-1.26189	0.120276	0.0597343	0.0443404	0.235711	0.0613457	0.271163
AFF1	-0.0229207	-0.0263348	-0.0360828	-0.0269885	-0.0580941	-0.0335221	-0.968775	-0.970219	-0.860879	NA	NA	NA	NA	NA	NA	NA	NA	NA	NA	NA	NA
AFF3	-0.0225268	-0.0252378	-0.0246247	-1.26196	-1.26196	-1.26196	-1.164	-1.26184	-0.861324	NA	NA	NA	NA	NA	NA	NA	NA	NA	NA	NA	NA
AFF4	-0.16221	-0.259813	-0.000125366	-1.26186	-1.26187	-1.26185	-0.16919	-0.245265	-0.34879	-0.262285	-0.0122958	-0.0120383	-0.00383609	-1.26193	-1.26189	-1.26195	-1.26193	-1.26194	0.0467638	0.0763533	0.0541919
AFG1L	0.0287887	0.0453316	0.0407791	-1.262	-1.262	-1.262	-0.0399601	-0.0532639	-0.0409522	NA	NA	NA	NA	NA	NA	NA	NA	NA	NA	NA	NA
AFG3L1	0.0601489	0.0607858	0.0569775	0.14388	0.146293	0.149761	0.14142	0.135345	0.134617	NA	NA	NA	NA	NA	NA	NA	NA	NA	NA	NA	NA
AFG3L2	0.313044	0.311316	0.309535	0.288339	0.272882	0.282142	0.311316	0.319504	0.315436	0.315449	0.280861	0.291072	0.313062	0.307579	0.30994	0.255423	0.301504	0.25857	0.214251	0.222152	0.150997
AFMID	-1.26197	-1.26197	-1.26197	0.0349103	0.0513563	0.0331792	-1.26198	-1.26198	-1.26198	NA	NA	NA	NA	NA	NA	NA	NA	NA	NA	NA	NA
AFTPH	-0.0546879	-0.0427455	0.00591191	0.104367	0.0984842	0.10526	0.144457	0.143671	0.145323	-0.0144554	0.0834059	0.0881159	0.0347612	0.072182	0.063722	0.0403256	0.112111	0.0975344	-0.0365076	0.12469	-0.258732
AGA	-0.0359213	-0.0270604	-0.0128338	0.105788	0.0997704	0.106827	-0.963541	-0.770463	-1.06951	0.167035	0.150997	0.113755	0.0908767	0.183983	0.163537	0.0714659	0.098358	0.052623	-0.0454544	-0.00423145	-0.243113
AGAP2	0.28084	0.274411	0.273441	0.311244	0.319156	0.312753	0.150388	0.155181	0.152169	0.131487	0.109449	0.087237	0.250665	0.17181	0.21236	-0.0611988	0.00641037	-1.26194	-0.0200536	0.109228	-0.241323
AGAP3	0.0514522	0.0502595	0.0453316	0.00633509	0.00711968	0.00734505	0.14546	0.113957	0.101097	NA	NA	NA	NA	NA	NA	NA	NA	NA	NA	NA	NA
AGFG1	0.275898	0.284421	0.28657	0.308963	0.301837	0.310411	0.315721	0.307537	0.302489	0.294173	0.312766	0.303255	0.272953	0.251261	0.256191	0.22534	0.278235	0.226327	0.334712	0.318521	0.317987
AGFG2	0.14108	0.158141	0.143015	0.189906	0.180842	0.192808	0.0630783	0.0864274	0.0867976	0.163631	0.126185	0.15113	0.169111	0.142575	0.105995	0.0570306	0.108505	0.076489	-0.248492	0.0525638	0.0504519
AGGF1	-0.450028	-0.349993	-0.25217	-0.364524	-0.353234	-0.347914	-0.654698	-0.655404	-0.668144	NA	NA	NA	NA	NA	NA	NA	NA	NA	NA	NA	NA
AGK	0.375111	0.370374	0.367373	0.231767	0.228769	0.226614	0.273441	0.274864	0.27071	0.349237	0.347573	0.357644	0.237711	0.30224	0.320801	0.330417	0.366859	0.354735	0.4047	0.510114	0.441571
AGL	-0.240123	-0.352685	-0.26216	-1.26185	-1.26188	-1.26186	-0.349993	-0.0203187	-0.0386018	0.332295	0.329077	0.290143	0.354371	0.332456	0.33926	0.31027	0.284277	0.243309	0.298835	0.268551	0.2728
AGO1	0.326457	0.324715	0.326144	0.0649712	0.0339905	0.0546756	0.1542	0.152299	0.153178	0.240758	0.250297	0.252628	0.283809	0.283111	0.260784	0.151853	0.168769	0.126185	0.236192	0.170309	0.214368
AGO2	0.512209	0.507346	0.511818	0.353768	0.348007	0.348229	0.357573	0.356077	0.359236	0.302424	0.278339	0.326519	0.331983	0.305612	0.305288	0.255687	0.209003	0.226924	0.258809	0.316024	0.300038
AGPAT1	0.288557	0.284051	0.283589	0.0869741	0.0804122	0.0833416	0.15498	0.160849	0.163849	-0.662986	-0.652467	-1.26195	-0.649728	-1.26193	-1.26189	-0.00988456	-1.26193	0.0209414	0.0771385	0.0620619	0.000558837
AGPAT2	-0.0177383	-0.0376898	0.00387798	-1.26184	-1.26185	-1.26185	0.0319069	0.014316	-0.010766	NA	NA	NA	NA	NA	NA	NA	NA	NA	NA	NA	NA
AGPAT3	0.287857	0.275581	0.286062	0.357478	0.364726	0.360509	0.137073	0.124834	0.12512	0.095197	0.107152	0.0787351	0.0136982	0.0687953	0.129594	-1.26195	-1.26193	-1.26194	-1.26192	-1.26189	-1.26191
AGPAT4	0.0816002	0.0856938	0.0861116	0.214594	0.219168	0.211645	0.103341	0.0993556	0.103934	NA	NA	NA	NA	NA	NA	NA	NA	NA	NA	NA	NA
AGPAT5	0.161757	0.148117	0.153943	0.220492	0.24449	0.226003	0.145017	0.133126	0.13688	0.138465	0.0930468	0.131094	0.230338	0.124558	0.148878	0.110179	0.123394	0.128847	-0.0142467	-0.0487805	0.00416555
AGPAT6	-0.0196616	-0.0243467	-0.0209204	0.147853	0.151725	0.151885	0.138125	0.142292	0.145629	NA	NA	NA	NA	NA	NA	NA	NA	NA	NA	NA	NA
AGPAT9	-1.26197	-1.26197	-1.26197	-1.26187	-1.26185	-1.26185	-1.26186	-1.26187	-1.26187	NA	NA	NA	NA	NA	NA	NA	NA	NA	NA	NA	NA
AGPS	0.292527	0.28692	0.288979	0.336402	0.337419	0.335316	0.304414	0.301671	0.30561	0.116925	0.0778044	0.0933638	0.0508441	0.0929281	0.0987242	0.221897	0.259041	0.261661	0.29748	0.233945	0.209279
AGT	-1.26197	-1.26197	-1.26197	-1.262	-1.262	-1.262	0.0965586	0.152819	0.099485	NA	NA	NA	NA	NA	NA	NA	NA	NA	NA	NA	NA
AGTPBP1	-1.26186	-1.26186	-1.26185	-1.26183	-1.07451	-1.16387	-1.2619	-1.2619	-1.2619	-0.858265	-0.961764	-1.26195	-1.26194	-1.26193	-1.26189	-0.655135	-1.26193	-1.26194	-1.26192	-1.26189	-1.26191
AGXT	-1.26197	-1.26197	-1.26197	0.119727	0.11192	0.117169	-1.26198	-1.26198	-1.26198	NA	NA	NA	NA	NA	NA	NA	NA	NA	NA	NA	NA
AHCTF1	0.274245	0.264933	0.268718	0.188099	0.191815	0.186402	0.262911	0.261343	0.260587	0.165926	0.135353	0.139473	0.211477	0.177392	0.209442	0.217512	0.211159	0.257533	0.186948	0.0907233	0.129076
AHCY	0.848924	0.853734	0.866101	0.839503	0.802607	0.827679	0.547784	0.521006	0.532954	0.511049	0.519591	0.525385	0.597872	0.53069	0.51862	0.504551	0.491379	0.503074	0.472151	0.497601	0.467289
AHCYL1	0.25536	0.252177	0.254672	0.197439	0.197299	0.197224	0.279899	0.276497	0.274495	0.328764	0.293342	0.291583	0.320239	0.324516	0.343048	0.235481	0.265119	0.252217	0.201074	0.269574	0.221457
AHCYL2	0.366559	0.363124	0.361476	0.405745	0.404881	0.404578	0.330202	0.331199	0.338586	0.0436889	0.0484877	0.0330997	0.148619	0.0607275	0.0654534	0.139777	0.0744217	0.0515936	0.0134683	-1.26189	-1.26191
AHDC1	0.0386879	0.0344494	0.0331792	-0.655404	-0.64785	-0.648693	0.00885162	0.00644091	0.00724455	NA	NA	NA	NA	NA	NA	NA	NA	NA	NA	NA	NA
AHNAK	0.124413	0.105123	0.111033	0.313522	0.285545	0.304109	0.209698	0.16151	0.16184	2.14293	2.14293	2.1155	1.80152	1.64476	1.6228	1.0149	1.30272	1.20268	1.07695	0.756045	0.952333
AHR	-1.26197	-1.26197	-1.26197	-0.0140274	0.0168338	0.00129019	-0.0564142	-0.0393957	-0.253514	NA	NA	NA	NA	NA	NA	NA	NA	NA	NA	NA	NA
AHSA1	0.687504	0.671224	0.689967	0.683452	0.647652	0.66402	0.770671	0.730812	0.736456	0.290583	0.320409	0.292557	0.348085	0.373078	0.374225	0.521473	0.432261	0.481972	0.516493	0.458688	0.44632
AHSA2	0.139206	0.13601	0.139456	0.215142	0.226537	0.225946	0.22195	0.229066	0.241246	NA	NA	NA	NA	NA	NA	NA	NA	NA	NA	NA	NA
AIDA	0.178456	0.185913	0.180004	0.157928	0.15266	0.159417	0.151725	0.139456	0.141546	0.136493	0.193172	0.146349	0.174142	0.187223	0.196305	0.0583521	0.0993742	0.173551	0.0418122	0.0508441	0.0477793
AIFM1	0.433564	0.424888	0.42712	0.353576	0.3567	0.351288	0.404881	0.398973	0.402489	0.408803	0.39388	0.411407	0.47848	0.464208	0.447837	0.377271	0.493657	0.424507	0.371614	0.293943	0.266674
AIFM2	-1.26197	-1.26197	-1.26197	-0.856101	-0.858933	-0.861168	-1.26198	-1.26198	-1.26198	NA	NA	NA	NA	NA	NA	NA	NA	NA	NA	NA	NA
AIM1	0.0836609	0.0846594	0.0842618	0.210289	0.211833	0.214321	0.116245	0.136196	0.142044	NA	NA	NA	NA	NA	NA	NA	NA	NA	NA	NA	NA
AIM2	0.0817378	0.0788816	0.0739832	0.127052	0.127615	0.130545	0.0555703	0.0307531	0.0163592	NA	NA	NA	NA	NA	NA	NA	NA	NA	NA	NA	NA
AIMP1	0.398002	0.44034	0.439491	0.525729	0.529458	0.525729	0.559789	0.559007	0.557543	0.374794	0.380839	0.388688	0.377271	0.310372	0.326992	0.39268	0.407199	0.409468	0.3982	0.363506	0.384312
AIMP2	0.325826	0.333315	0.324304	0.436147	0.436342	0.435731	0.393383	0.40517	0.404158	0.187524	0.220568	0.217068	0.215861	0.192315	0.228335	0.207301	0.201151	0.199281	0.33147	0.330417	0.332927
AIP	0.262166	0.303547	0.317554	0.458218	0.439183	0.444841	0.426735	0.425875	0.420061	0.44924	0.447837	0.466575	0.435211	0.439755	0.427616	0.547969	0.421938	0.478107	0.433712	0.497171	0.450912
AK1	-1.26197	-1.26197	-1.26197	-0.0633913	-0.0224074	-0.0633913	-1.26198	-1.26198	-1.26198	NA	NA	NA	NA	NA	NA	NA	NA	NA	NA	NA	NA
AK2	0.325273	0.365491	0.368199	0.587571	0.561143	0.567011	0.470524	0.519494	0.484209	0.533783	0.569855	0.559265	0.478107	0.544634	0.495034	0.48035	0.515282	0.522454	0.49851	0.474737	0.502435
AK3	0.342826	0.354694	0.361326	0.25755	0.256378	0.256915	0.258326	0.259492	0.246124	0.324516	0.349237	0.32667	0.272481	0.341999	0.328764	0.246109	0.278128	0.296884	0.24207	0.150997	0.263603
AK4	-0.660533	-0.661179	-0.648606	0.193017	0.196933	0.207693	0.336153	0.375493	0.380476	-1.26195	-1.26195	-1.26195	-1.26194	-1.26193	-1.26189	0.0507001	0.0500289	-1.26194	-1.26192	-1.26189	-1.26191
AKAP1	-1.26197	-1.26197	-1.26197	-0.0296686	-0.0484122	-0.0306383	0.0607333	0.0565436	0.0364943	NA	NA	NA	NA	NA	NA	NA	NA	NA	NA	NA	NA
AKAP10	0.112151	0.105313	0.105424	0.116365	0.117546	0.117951	0.128204	0.133372	0.135517	NA	NA	NA	NA	NA	NA	NA	NA	NA	NA	NA	NA
AKAP11	0.0620346	0.0597151	0.0604582	-0.00983047	-0.0241589	-0.0159833	0.0144726	0.0257629	0.0291908	-0.00366135	-0.0131798	-1.26195	-1.26194	-1.26193	-1.26189	-1.26195	-1.26193	-0.662986	-1.26192	-1.26189	-1.26191
AKAP12	-1.26183	-1.26184	-1.26185	-1.26193	-1.26192	-1.26192	-1.26183	-0.972011	-0.665226	NA	NA	NA	NA	NA	NA	NA	NA	NA	NA	NA	NA
AKAP13	0.260587	0.24449	0.245925	0.17065	0.16778	0.170778	0.205565	0.201339	0.20329	0.246491	0.260108	0.250518	0.288963	0.244083	0.23912	0.208769	0.252057	0.187734	0.160869	0.145109	0.19493
AKAP8	0.363558	0.411486	0.419627	0.346646	0.354619	0.345961	0.421438	0.41597	0.399267	0.105522	0.10282	0.138263	0.0379022	0.0283389	0.00936275	-0.0422744	0.0397573	0.027712	0.125131	0.072182	-0.0182701
AKAP8L	0.283589	0.281809	0.284359	0.0916691	0.101545	0.0947198	0.277697	0.272468	0.265111	0.209883	0.221327	0.20482	0.177475	0.224153	0.230994	0.154752	0.222029	0.142958	0.0711006	0.0733571	0.0891885
AKAP9	0.081466	0.0771037	0.091186	0.117094	0.122835	0.119451	0.125182	0.126782	0.131101	0.054053	0.100357	0.131974	0.113468	-0.0151329	-1.26189	0.134227	-1.26193	0.0455814	-1.26192	-0.0153417	0.127169
AKNA	0.165779	0.163996	0.162989	0.154134	0.163416	0.157559	0.109899	0.10996	0.111997	0.0772978	0.0848167	0.110669	-0.0583453	0.0485874	-1.26189	0.109614	0.132839	0.0473834	-1.26192	0.0231452	0.00568956
AKR1A1	0.383822	0.416566	0.413984	0.495986	0.495986	0.493525	0.373394	0.362707	0.37858	0.511542	0.495791	0.506958	0.486872	0.502435	0.510114	0.492914	0.504059	0.466922	0.495791	0.528137	0.454
AKR1B1	1.5578	1.53614	1.51983	0.642386	0.62185	0.641006	0.837841	0.853734	0.835154	0.582152	0.586506	0.536633	0.610893	0.711785	0.77118	0.533783	0.509291	0.519149	0.424834	0.436601	0.422969
AKR1B10	0.211918	0.197036	0.191815	0.203854	0.208175	0.213134	0.137141	0.133757	0.141798	NA	NA	NA	NA	NA	NA	NA	NA	NA	NA	NA	NA
AKR1C3	0.135074	0.117401	0.100566	0.21572	0.241492	0.208896	0.0543244	0.0312222	0.070998	-1.26195	-1.26195	-1.26195	0.0622336	0.0162058	0.0452319	-0.866524	-1.26193	-0.00523561	-0.0189329	-1.26189	0.0157069
AKR1E2	0.234407	0.231011	0.214099	0.139456	0.120833	0.121783	0.0717987	0.0638848	0.0816767	NA	NA	NA	NA	NA	NA	NA	NA	NA	NA	NA	NA
AKR7L	0.319602	0.326245	0.332017	0.214537	0.221353	0.215221	0.307901	0.309941	0.323779	NA	NA	NA	NA	NA	NA	NA	NA	NA	NA	NA	NA
AKT1	0.200448	0.192373	0.190178	0.277883	0.287232	0.282426	0.265023	0.261181	0.264573	0.184659	0.173261	0.194071	0.228436	0.161253	0.167217	0.212612	0.206296	0.228546	0.227965	0.184888	0.189792
AKT1S1	-0.0399601	-0.0397779	-0.0257544	-0.00956132	0.00724455	-0.015738	-1.26198	-1.26198	-1.26198	NA	NA	NA	NA	NA	NA	NA	NA	NA	NA	NA	NA
AKT2	0.276848	0.278653	0.268924	0.329498	0.342826	0.331199	0.32183	0.325673	0.327366	0.145536	0.132158	0.157238	0.179383	0.135682	0.173645	0.202581	0.184108	0.208619	0.153533	0.127028	0.25286
AKTIP	-0.0052244	-0.015608	-0.00663206	-1.26194	-1.2619	-1.26193	0.0419992	0.0577405	0.0593718	-1.26195	-0.022936	-1.26195	0.0709049	0.0308809	0.0562329	0.111047	-1.26193	0.0758739	-1.26192	-1.26189	0.047526
AL035078.4	0.0178859	0.0929458	0.0961644	0.351288	0.350802	0.356216	0.21404	0.198429	0.198372	NA	NA	NA	NA	NA	NA	NA	NA	NA	NA	NA	NA
AL133353.2	0.0324275	0.0350809	0.0327421	0.104424	0.111719	0.107619	0.101097	0.0942438	0.0965586	NA	NA	NA	NA	NA	NA	NA	NA	NA	NA	NA	NA
AL159141.1	0.241664	0.234528	0.235519	0.168986	0.169125	0.174503	0.144938	0.145276	0.147767	NA	NA	NA	NA	NA	NA	NA	NA	NA	NA	NA	NA
AL445685.3	0.244352	0.268219	0.263573	0.246404	0.245125	0.239357	0.341766	0.350699	0.348443	NA	NA	NA	NA	NA	NA	NA	NA	NA	NA	NA	NA
ALAD	0.220961	0.219351	0.21675	0.325973	0.328266	0.329399	0.181454	0.170179	0.18585	0.308736	0.321438	0.317858	0.313201	0.276203	0.280861	0.271359	0.223559	0.18446	0.285031	0.200356	0.224255
ALAS1	-1.26197	-1.26197	-1.26197	-1.26184	-0.963541	-0.962897	0.0945026	0.122298	0.137486	NA	NA	NA	NA	NA	NA	NA	NA	NA	NA	NA	NA
ALB	0.340228	0.379207	0.390255	-1.262	-1.262	-1.262	0.110116	0.0958073	0.0866663	NA	NA	NA	NA	NA	NA	NA	NA	NA	NA	NA	NA
ALCAM	-0.0170714	-0.0395166	-0.0497877	0.0483979	0.0476714	0.0493264	0.135876	0.104828	0.121241	-1.26195	-1.26195	-1.26195	-1.26194	-1.26193	-1.26189	-1.26195	-1.26193	-1.26194	0.0972298	-1.26189	-1.26191
ALDH16A1	0.268055	0.260668	0.258988	0.284846	0.289387	0.286207	0.240398	0.227682	0.238823	0.339081	0.343441	0.332733	0.286019	0.362757	0.350466	0.244478	0.232092	0.246491	0.214622	0.278339	0.260784
ALDH18A1	0.400752	0.39458	0.401992	0.469038	0.476349	0.470259	0.383199	0.387931	0.410837	0.195763	0.220871	0.172277	0.243946	0.217399	0.201566	0.269442	0.346355	0.358729	0.348626	0.311661	0.315573
ALDH1B1	0.26278	0.26611	0.267967	0.177684	0.167174	0.168986	0.245629	0.241407	0.243526	0.185057	0.218192	0.233095	0.182889	0.196143	0.174835	0.163194	0.193625	0.163257	0.148219	0.0919368	0.165863
ALDH1L1	-0.0693066	-0.151807	-0.150758	0.0220431	0.0344494	0.0351654	-0.0113404	-0.0131901	-0.00457799	NA	NA	NA	NA	NA	NA	NA	NA	NA	NA	NA	NA
ALDH2	0.422984	0.388065	0.395414	0.27021	0.257008	0.259268	0.370675	0.355066	0.367507	0.00162756	0.0467638	-0.0373907	0.136816	-0.348542	0.0335992	-1.26195	-1.26193	-1.26194	0.1293	-1.26189	-0.262999
ALDH3A2	0.324715	0.325973	0.3205	0.214713	0.226861	0.215574	0.314681	0.320657	0.326144	0.14174	0.207563	0.163194	0.139777	0.167035	0.14619	0.109535	0.139004	0.115515	0.104481	-0.0361366	-0.00023962
ALDH4A1	0.454169	0.454552	0.453614	0.234824	0.236211	0.240511	0.308208	0.312944	0.322055	NA	NA	NA	NA	NA	NA	NA	NA	NA	NA	NA	NA
ALDH5A1	0.079877	0.0736854	0.0721682	-0.240123	-0.244721	-0.0595255	-1.26198	-1.26198	-1.26198	0.223222	0.233721	0.24365	0.194721	0.270088	0.253661	0.270281	0.325579	0.305448	0.233274	0.213404	0.24775
ALDH6A1	0.359933	0.359087	0.362168	0.0049421	-0.0086004	-0.00781148	0.246065	0.246124	0.247278	0.343441	0.35544	0.340248	0.325708	0.328618	0.346166	0.360847	0.351882	0.233095	0.268826	0.200456	0.282048
ALDH7A1	0.157133	0.154858	0.147371	0.219287	0.21641	0.221438	0.240449	0.248644	0.265806	NA	NA	NA	NA	NA	NA	NA	NA	NA	NA	NA	NA
ALDH8A1	-1.26197	-1.26197	-1.26197	-1.26199	-1.26199	-1.26198	-1.26198	-1.26198	-1.26198	NA	NA	NA	NA	NA	NA	NA	NA	NA	NA	NA	NA
ALDH9A1	0.561143	0.55488	0.563119	0.441301	0.4375	0.43554	0.553738	0.549963	0.568656	0.566136	0.580895	0.597872	0.591996	0.597872	0.577734	0.496174	0.486512	0.465895	0.381285	0.391723	0.367868
ALDOA	1.0274	1.19664	1.26676	3.05206	3.29736	3.05206	3.05206	3.42644	3.58176	1.58507	1.64476	1.57146	1.57146	1.6228	1.60363	1.47566	1.37838	1.38932	1.45377	1.492	1.57146
ALDOC	0.115357	0.118967	0.112715	0.422822	0.401992	0.40893	0.213465	0.230113	0.29518	0.685652	0.712981	0.727977	0.623342	0.668237	0.663546	0.636322	0.591996	0.628913	0.786536	0.876527	0.813659
ALG1	0.159115	0.15153	0.155059	-0.00789822	-0.00542838	-0.012086	0.0556686	0.0446154	0.0219283	0.085344	-0.252296	0.0283389	0.00109596	0.0529737	0.0689085	0.142725	0.0108857	0.0993223	-0.00523561	-1.26189	-0.0506875
ALG10B	0.20329	0.203496	0.20186	-0.0185495	0.000954436	-0.00886705	0.101545	0.107002	0.0935327	NA	NA	NA	NA	NA	NA	NA	NA	NA	NA	NA	NA
ALG11	0.0756848	0.0791183	0.0816002	0.0359032	0.043914	0.0330029	0.150949	0.151103	0.145931	NA	NA	NA	NA	NA	NA	NA	NA	NA	NA	NA	NA
ALG12	0.113893	0.106028	0.109668	0.016743	0.0416114	0.0196133	-0.044156	-0.0555819	-0.166397	-1.26195	-0.558507	-1.26195	-0.350921	0.0451202	0.0242601	-0.662986	-1.26193	-0.444537	-1.26192	-1.26189	-1.26191
ALG13	-1.26197	-1.26197	-1.26197	-1.07117	-0.969751	-0.858211	-0.00479668	0.00446737	-0.00542838	NA	NA	NA	NA	NA	NA	NA	NA	NA	NA	NA	NA
ALG14	0.0120426	0.012733	0.00470387	-0.959127	-0.860468	-0.856101	-0.0493286	-0.0348217	-0.0212259	NA	NA	NA	NA	NA	NA	NA	NA	NA	NA	NA	NA
ALG2	0.329913	0.327051	0.316689	0.271407	0.262486	0.263398	0.25755	0.257116	0.245569	0.160295	0.0836457	0.0231452	0.0117205	0.123952	0.103135	0.192475	0.21141	0.219638	0.0179377	0.0810605	0.128095
ALG3	0.0705113	0.0680933	0.0509515	0.00908346	0.00435776	0.00108614	-0.0566818	-0.0584195	-0.0725193	-1.26195	-1.26195	-1.26195	-0.350728	-0.24446	-0.0314403	-1.26195	-1.26193	-1.26194	-0.0235171	0.0492132	-0.045213
ALG5	0.332948	0.32961	0.327501	0.256572	0.256161	0.256299	0.230933	0.219351	0.225521	-0.674522	-1.26195	-0.00923531	0.164372	0.0604468	-1.26189	0.0976358	0.1073	0.175404	-1.26192	0.100223	0.00767459
ALG8	-0.150099	-0.0483007	-0.0461558	-0.354366	-0.253947	-0.446279	0.0205734	0.0123925	0.0180847	-0.160007	0.0133565	-0.148732	-0.157998	-1.26193	-1.26189	-1.26195	0.0502596	-0.0469766	-1.26192	-1.26189	-1.26191
ALG9	0.105891	0.0948708	0.100104	0.0476714	0.0291307	0.0490244	-0.0269885	-0.0287037	-0.0518936	NA	NA	NA	NA	NA	NA	NA	NA	NA	NA	NA	NA
ALKBH1	0.0399931	0.0404993	0.0393578	-1.262	-0.664169	-1.26197	0.0294379	0.00633509	-0.00146028	NA	NA	NA	NA	NA	NA	NA	NA	NA	NA	NA	NA
ALKBH2	-0.0668219	-0.046685	-0.0698739	-1.262	-1.262	-1.262	0.0466862	0.0689519	0.058765	NA	NA	NA	NA	NA	NA	NA	NA	NA	NA	NA	NA
ALKBH3	0.124759	0.149291	0.141227	0.18925	0.183109	0.18766	0.140383	0.137224	0.146374	NA	NA	NA	NA	NA	NA	NA	NA	NA	NA	NA	NA
ALKBH4	0.0310941	0.0249505	0.0321607	-0.0369195	-0.0318055	-0.0318055	0.0441365	0.0544516	0.0605411	NA	NA	NA	NA	NA	NA	NA	NA	NA	NA	NA	NA
ALKBH5	0.342304	0.338135	0.32867	0.28598	0.284421	0.288824	0.300571	0.313228	0.328755	0.156089	0.174743	0.160869	0.138574	0.185381	0.174633	0.165074	0.198644	0.211477	0.210644	0.218313	0.185142
ALKBH6	-0.0307704	-0.058753	-0.0414351	0.0277362	0.0327421	0.0403694	0.170232	0.171745	0.183496	NA	NA	NA	NA	NA	NA	NA	NA	NA	NA	NA	NA
ALKBH7	-0.464571	-0.457558	-0.446104	0.0136311	0.0173981	0.0191568	-1.26198	-1.26198	-1.26198	NA	NA	NA	NA	NA	NA	NA	NA	NA	NA	NA	NA
ALKBH8	0.0665218	0.0544516	0.0558814	0.0523726	0.0540661	0.0484552	0.124939	0.116055	0.115799	NA	NA	NA	NA	NA	NA	NA	NA	NA	NA	NA	NA
ALMS1	-1.2619	-1.2619	-1.2619	-1.26199	-1.26199	-1.26199	-1.26192	-1.26192	-1.26192	-0.968376	-0.0309743	-1.26195	-1.26194	-1.26193	-1.26189	0.164695	0.166367	0.154894	-1.26192	-1.26189	-1.26191
ALPK2	-0.76587	-0.930102	-0.857736	-1.16414	-0.858211	-0.671564	-1.26198	-1.26198	-1.26198	NA	NA	NA	NA	NA	NA	NA	NA	NA	NA	NA	NA
ALPL	-1.26197	-1.26197	-1.26197	-1.262	-1.262	-1.262	-1.26192	-1.26192	-1.26192	NA	NA	NA	NA	NA	NA	NA	NA	NA	NA	NA	NA
ALS2	0.124338	0.126516	0.127349	-1.16512	-1.26183	-1.26183	-1.16448	-1.26183	-1.16465	NA	NA	NA	NA	NA	NA	NA	NA	NA	NA	NA	NA
ALS2CL	0.191418	0.194224	0.188481	-0.00834105	-0.0204558	-0.0151572	0.00187608	0.00535105	0.0139655	NA	NA	NA	NA	NA	NA	NA	NA	NA	NA	NA	NA
ALYREF	0.807248	0.805709	0.836544	0.662197	0.698352	0.678751	0.787677	0.768169	0.739178	0.483112	0.50357	0.469934	0.450305	0.432855	0.444717	0.514254	0.464898	0.492914	0.554791	0.570519	0.534811
AMACR	0.123679	0.110953	0.110953	-0.669857	-0.55695	-0.643541	0.0316569	0.0291307	0.0376546	NA	NA	NA	NA	NA	NA	NA	NA	NA	NA	NA	NA
AMBRA1	0.0208633	0.0232095	0.0207379	0.0847553	0.0878326	0.0865574	0.109772	0.109348	0.108242	NA	NA	NA	NA	NA	NA	NA	NA	NA	NA	NA	NA
AMD1	-1.26185	-1.26185	-1.26185	-1.26198	-1.26198	-1.26198	-0.642782	-0.643306	-0.648435	NA	NA	NA	NA	NA	NA	NA	NA	NA	NA	NA	NA
AMDHD2	0.360963	0.358316	0.363339	0.417828	0.424888	0.41485	0.241664	0.249664	0.264441	0.133474	0.0990515	0.135579	0.087237	0.14174	0.135076	-0.0510962	-1.26193	0.0535949	-1.26192	-1.26189	-1.26191
AMFR	0.053147	0.0536636	0.0544516	0.153842	0.160249	0.15659	0.196511	0.191568	0.19024	NA	NA	NA	NA	NA	NA	NA	NA	NA	NA	NA	NA
AMICA1	-1.26189	-1.26189	-1.26188	0.0119027	0.0113336	0.0229932	-1.26198	-1.26198	-1.26198	NA	NA	NA	NA	NA	NA	NA	NA	NA	NA	NA	NA
AMMECR1	-0.651393	-0.650288	-0.646256	-0.0546879	-0.0273748	-0.0381793	-0.0244949	-0.0376898	-0.0412831	NA	NA	NA	NA	NA	NA	NA	NA	NA	NA	NA	NA
AMMECR1L	0.00470387	0.0147469	0.0201444	0.00206296	-0.00926192	-0.00217976	0.135703	0.131015	0.124017	NA	NA	NA	NA	NA	NA	NA	NA	NA	NA	NA	NA
AMPD2	0.242541	0.233104	0.232684	0.303427	0.294829	0.300092	0.275794	0.281809	0.2785	0.325402	0.310571	0.318453	0.348846	0.355603	0.354611	0.204987	0.286537	0.299155	0.153727	0.228743	0.184567
AMPD3	0.22942	0.219988	0.221186	-1.26198	-1.26199	-1.26199	-0.449239	-0.461274	-0.643027	0.216141	0.219773	0.211721	0.223938	0.220453	0.189792	0.15291	0.19293	0.00755002	0.1604	0.0816939	0.17577
AMZ2	0.0737592	0.070998	0.0765012	-1.26195	-1.26196	-1.26195	-0.152642	-0.0401513	-0.0215567	NA	NA	NA	NA	NA	NA	NA	NA	NA	NA	NA	NA
ANAPC1	0.103621	0.0924053	0.09434	0.166329	0.161677	0.165281	0.0999226	0.0979069	0.111033	0.0108857	0.0179377	-0.0309743	0.0570306	0.0753457	-1.26189	0.126019	0.0330997	0.0895112	0.0062614	-1.26189	0.0453665
ANAPC10	0.0786422	0.0774851	0.0804122	0.0759586	0.0578377	0.0559502	0.171983	0.180889	0.177484	NA	NA	NA	NA	NA	NA	NA	NA	NA	NA	NA	NA
ANAPC11	-0.0205455	-0.0172159	-0.0219679	0.168647	0.183496	0.171983	0.0961028	0.143778	0.0939907	NA	NA	NA	NA	NA	NA	NA	NA	NA	NA	NA	NA
ANAPC2	0.142432	0.127219	0.13043	0.188867	0.195419	0.191123	0.174803	0.170778	0.169055	NA	NA	NA	NA	NA	NA	NA	NA	NA	NA	NA	NA
ANAPC4	0.184626	0.180889	0.181633	0.222289	0.226614	0.220571	0.192423	0.189747	0.196598	-0.649461	-0.561348	-1.26195	-1.26194	-1.26193	-1.26189	-0.650884	-0.447514	-0.650351	-1.26192	-1.26189	-1.26191
ANAPC5	0.173632	0.167054	0.165144	0.24793	0.241327	0.242925	0.188394	0.189466	0.190411	0.00492561	-0.470525	0.0863402	0.0455814	-0.246608	-1.26189	0.0829382	-0.362131	-1.26194	0.116328	0.090174	0.0991742
ANAPC7	0.15607	0.148396	0.144006	0.225443	0.224157	0.225443	0.190411	0.188481	0.184181	0.0798991	0.0348959	0.0949723	-0.00163187	-0.0166027	0.0435689	0.203397	0.0602988	0.194318	0.125894	0.38539	0.192355
ANGEL2	0.162835	0.154388	0.157559	0.0876275	0.0865574	0.0874493	0.0813671	0.0776586	0.0746527	-0.360429	-1.26195	-0.239271	-0.0197653	-1.26193	0.0422563	-1.26195	-1.26193	-1.26194	-1.26192	-1.26189	-1.26191
ANKFY1	0.318191	0.311514	0.310838	0.264933	0.275045	0.26737	0.263453	0.262111	0.278367	0.366328	0.354611	0.359889	0.250046	0.321438	0.361027	0.264089	0.278667	0.290079	0.138353	0.251608	0.196593
ANKHD1	0.153436	0.142292	0.148117	0.16829	0.161158	0.164845	0.242475	0.236275	0.237484	-0.0530054	0.0446241	0.0532786	-0.659851	0.0313572	-0.0103163	0.191421	0.121188	0.186948	0.217512	0.191332	0.216976
ANKIB1	-0.0247433	-0.0241589	-0.0287037	0.0564267	0.0735225	0.0665941	0.104886	0.107619	0.111222	NA	NA	NA	NA	NA	NA	NA	NA	NA	NA	NA	NA
ANKLE1	-1.26197	-1.26197	-1.26197	-1.26196	-1.26197	-1.26197	0.0253354	0.0648557	-0.16919	NA	NA	NA	NA	NA	NA	NA	NA	NA	NA	NA	NA
ANKLE2	0.0967443	0.0912553	0.096516	0.163996	0.145629	0.162781	0.206931	0.207889	0.210751	0.568172	-1.26195	0.193116	0.759385	1.04051	0.757746	0.633951	0.621255	0.43155	0.56324	0.590524	0.550642
ANKMY2	0.103828	0.102898	0.1055	0.0516686	0.0325478	0.040567	0.00071119	-0.00469234	0.0182215	NA	NA	NA	NA	NA	NA	NA	NA	NA	NA	NA	NA
ANKRD10	-1.26197	-1.26197	-1.26197	-0.0348217	-0.244855	-0.0459286	0.0158101	0.00217746	0.00535105	NA	NA	NA	NA	NA	NA	NA	NA	NA	NA	NA	NA
ANKRD11	0.0230728	0.0173204	0.0215914	-0.646256	-0.65242	-0.649055	0.0145831	0.0169132	0.0169132	-0.864167	-1.26195	-0.666122	-1.26194	0.216774	-1.26189	-0.246608	-1.26193	-1.26194	-1.26192	-1.26189	-1.26191
ANKRD13A	0.242139	0.232941	0.234671	0.246673	0.238362	0.246469	0.18759	0.184257	0.191721	0.256975	0.236375	0.26519	0.166263	0.21315	0.229206	0.136816	0.160768	0.145438	0.148521	0.193337	0.170309
ANKRD13C	-1.26197	-1.26197	-1.26197	-1.26193	-1.26191	-1.26193	-0.00674602	-0.00915548	-0.0331088	NA	NA	NA	NA	NA	NA	NA	NA	NA	NA	NA	NA
ANKRD16	-0.0497877	-0.0430061	-0.0331088	-0.257124	-0.258132	-0.352685	-0.0744831	-0.134031	-0.243353	NA	NA	NA	NA	NA	NA	NA	NA	NA	NA	NA	NA
ANKRD17	-0.0183591	-0.0307704	-0.015294	0.135765	0.127832	0.132262	0.144245	0.140963	0.138267	-1.26195	-1.26195	-1.26195	-1.26194	-1.26193	-1.26189	-0.865469	-1.26193	-0.445454	-0.0184511	0.0567373	-0.035313
ANKRD27	0.0164505	0.0155169	0.0160871	-0.166397	-0.15923	-0.241599	0.0888585	0.0761624	0.0817965	-1.26195	-0.661334	-1.26195	-0.667283	0.0033107	-1.26189	-0.966531	-0.347972	-0.365065	0.0568878	0.142489	-1.26191
ANKRD28	0.238126	0.225946	0.230521	0.124261	0.11673	0.123767	0.130545	0.124939	0.129338	-1.26195	0.0869897	-1.26195	-0.556914	-0.0441188	-0.00680232	-0.035313	-0.0669751	0.0173921	0.0329271	-1.26189	0.0503415
ANKRD32	-1.2619	-1.2619	-1.26189	-1.26184	-1.26187	-1.26184	-0.268203	-0.447509	-0.470068	NA	NA	NA	NA	NA	NA	NA	NA	NA	NA	NA	NA
ANKRD37	0.108875	0.11821	0.136087	-1.262	-1.262	-1.262	0.200192	0.240511	0.156807	NA	NA	NA	NA	NA	NA	NA	NA	NA	NA	NA	NA
ANKRD39	-1.26197	-1.26197	-1.26197	-0.0483007	-0.0592538	-0.0363333	-1.26187	-1.26187	-1.26185	NA	NA	NA	NA	NA	NA	NA	NA	NA	NA	NA	NA
ANKRD40	-1.26197	-1.26197	-1.26197	0.0804872	0.072954	0.0811807	0.00972707	0.0277362	0.0150252	NA	NA	NA	NA	NA	NA	NA	NA	NA	NA	NA	NA
ANKRD44	0.455137	0.434824	0.437091	0.42127	0.419917	0.418144	0.376569	0.382357	0.385579	0.469131	0.472994	0.464898	0.48961	0.429609	0.445333	0.432261	0.406968	0.412889	0.368224	0.319035	0.345325
ANKRD46	-1.26197	-1.26197	-1.26197	-0.0173413	-0.0668219	-0.0454533	0.176076	0.195545	0.211133	NA	NA	NA	NA	NA	NA	NA	NA	NA	NA	NA	NA
ANKRD50	0.0547922	0.0325478	0.0229932	0.00795797	0.00669159	0.021377	0.0517817	0.0581186	0.0717987	NA	NA	NA	NA	NA	NA	NA	NA	NA	NA	NA	NA
ANKRD52	-0.655126	-0.654698	-0.652728	0.177113	0.171163	0.179026	0.159258	0.166989	0.16836	NA	NA	NA	NA	NA	NA	NA	NA	NA	NA	NA	NA
ANKRD54	-0.00630348	0.0150252	0.000114694	-0.0298205	0.0058447	-0.0188846	0.111719	0.106405	0.101174	NA	NA	NA	NA	NA	NA	NA	NA	NA	NA	NA	NA
ANKRD62	-0.768116	-0.85905	-0.85797	-1.26199	-1.26199	-1.26199	-1.26189	-1.26189	-1.26189	NA	NA	NA	NA	NA	NA	NA	NA	NA	NA	NA	NA
ANKS1A	0.111101	0.100228	0.105586	0.171802	0.182165	0.179577	0.0985861	0.103559	0.0959332	0.00453887	0.038879	-1.26195	-0.653424	-0.0197653	0.0187774	-1.26195	-1.26193	-1.26194	-1.26192	-0.0571424	-1.26191
ANKZF1	0.123307	0.120677	0.124977	0.116896	0.114572	0.118756	0.154134	0.155961	0.157559	-1.26195	-1.26195	-1.26195	-0.251514	-1.26193	-1.26189	-1.26195	-1.26193	-0.643492	-0.149527	0.00215514	0.0562329
ANLN	-1.26188	-1.26188	-1.26188	0.134262	0.120677	0.13295	-0.0150568	-0.0490512	-0.0526848	NA	NA	NA	NA	NA	NA	NA	NA	NA	NA	NA	NA
ANO10	0.155366	0.150725	0.157648	0.0698177	0.0584516	0.0702602	0.0988467	0.101299	0.0989342	NA	NA	NA	NA	NA	NA	NA	NA	NA	NA	NA	NA
ANO6	0.159004	0.156273	0.1542	0.10908	0.110157	0.107717	0.120833	0.119169	0.127687	-1.26195	-1.26195	-0.34903	0.162078	-0.00523561	0.0628859	-0.259166	-0.0281404	-1.26194	-1.26192	-1.26189	-1.26191
ANP32A	1.17423	1.5578	1.61236	0.94154	0.899524	0.901881	1.30903	1.32434	1.13397	0.792334	0.780404	0.804176	0.566136	0.737705	0.668237	0.557533	0.635232	0.515282	0.627059	0.675042	0.759385
ANP32B	0.589996	0.641006	0.607005	0.51326	0.46588	0.52133	0.495741	0.480263	0.515639	0.553884	0.526928	0.543351	0.363171	0.376245	0.371968	0.401186	0.420068	0.396635	0.939485	0.641561	0.519149
ANP32E	0.362412	0.4016	0.416566	0.5364	0.551985	0.5364	0.514267	0.478783	0.426735	0.593349	0.577734	0.586506	0.370212	0.384891	0.377098	0.361303	0.384891	0.402868	0.606869	0.59553	0.654866
ANTKMT	0.0972245	0.0992953	0.0882757	0.173314	0.179355	0.174182	0.100566	0.108606	0.112976	NA	NA	NA	NA	NA	NA	NA	NA	NA	NA	NA	NA
ANTXR2	0.0625621	0.0605411	0.0459748	-1.2619	-1.26189	-1.26191	-1.26198	-1.26198	-1.26198	NA	NA	NA	NA	NA	NA	NA	NA	NA	NA	NA	NA
ANXA1	0.166162	0.117546	0.113435	0.452402	0.431278	0.461207	0.300335	0.232011	0.284469	2.1155	1.99339	2.18641	1.833	1.86145	1.73954	1.76571	1.80152	1.67223	1.51002	1.28307	1.4644
ANXA11	0.593712	0.585987	0.600097	0.420468	0.426059	0.419917	0.464778	0.462727	0.47554	0.708559	0.739778	0.744363	0.733815	0.712981	0.792334	0.544135	0.599417	0.612002	0.576815	0.567578	0.53069
ANXA2	0.519772	0.46608	0.465003	1.44651	1.3579	1.46763	0.76654	0.660932	0.755912	1.42894	1.53727	1.52513	1.52513	1.36726	1.31381	1.1533	1.45377	1.29384	1.28307	1.12417	1.20997
ANXA3	-0.253704	-0.452793	-0.243105	0.0984842	0.0678885	0.0604582	0.145073	0.0485157	0.1055	0.0314861	0.0144442	0.111162	0.092497	0.0131756	0.094001	0.112231	0.106545	0.108294	0.120351	0.0941378	0.0836457
ANXA4	0.229066	0.208967	0.205649	0.396041	0.386613	0.393264	0.342128	0.294215	0.327983	0.348846	0.346686	0.334898	0.284558	0.330417	0.335161	0.306363	0.339081	0.35037	0.293943	0.26252	0.287067
ANXA5	1.05697	1.0274	1.05697	0.593274	0.589607	0.579044	0.814642	0.79016	0.776945	0.939485	0.906359	0.925831	0.687041	0.698545	0.694312	0.706533	0.675042	0.725693	0.619345	0.642651	0.626259
ANXA6	1.81342	1.7653	1.74815	1.73148	1.53614	1.7184	0.872585	0.859287	0.848924	2.97036	2.97036	2.97036	3.32331	2.32006	2.59083	2.14293	2.03881	2.1155	2.25522	2.14293	2.14293
ANXA7	0.408179	0.413276	0.41485	0.518544	0.49305	0.511818	0.488475	0.486087	0.49949	0.643883	0.65864	0.615459	0.540832	0.653518	0.623342	0.48605	0.506514	0.490321	0.515982	0.597872	0.554791
AP1AR	-0.243428	-0.0566818	-0.0293224	0.0717987	0.0767561	0.0703433	0.0721038	0.0536636	0.0466862	NA	NA	NA	NA	NA	NA	NA	NA	NA	NA	NA	NA
AP1B1	0.362168	0.349726	0.349117	0.325364	0.331459	0.32411	0.281989	0.269873	0.258326	0.264346	0.211298	0.247519	0.258162	0.248718	0.237982	0.136071	0.116686	0.292756	0.285427	0.162633	0.193172
AP1G1	0.337129	0.329063	0.327051	0.310937	0.321157	0.315908	0.28	0.271407	0.280937	0.29748	0.340248	0.317574	0.331684	0.308311	0.322876	0.267445	0.352581	0.346355	0.348085	0.325402	0.348846
AP1G2	0.30561	0.294526	0.289265	0.212087	0.219988	0.210414	0.223076	0.224297	0.226914	0.198769	0.193713	0.174344	0.173751	0.0508441	0.0895112	0.177958	0.145018	0.237711	0.19419	0.150397	0.182686
AP1M1	0.49724	0.492525	0.475863	0.424031	0.418144	0.422658	0.432693	0.42712	0.436496	0.320801	0.349778	0.361958	0.356486	0.340061	0.365532	0.351041	0.331684	0.340592	0.292626	0.289425	0.283289
AP1S1	0.356216	0.351071	0.352248	0.374004	0.373886	0.373226	0.346081	0.335116	0.336291	-1.26195	-1.26195	-1.26195	-0.247154	0.0285088	-1.26189	-1.26195	-0.0278853	-0.0281404	0.00675098	0.0552535	0.0343218
AP1S2	0.320753	0.324973	0.321938	0.152883	0.155295	0.153842	0.163919	0.180842	0.176076	0.0971531	0.148521	0.190826	0.210644	0.220378	0.211159	0.0433913	0.108791	0.0832647	0.150397	0.229804	0.129779
AP1S3	0.146575	0.140963	0.140213	0.048582	0.0730272	0.0637917	-0.159909	-0.16221	-0.0387259	NA	NA	NA	NA	NA	NA	NA	NA	NA	NA	NA	NA
AP2A1	0.373551	0.36685	0.369499	0.350908	0.355486	0.354137	0.344974	0.344403	0.351936	0.380657	0.351724	0.391424	0.364069	0.335298	0.359967	0.386926	0.391006	0.357317	0.394485	0.342306	0.324953
AP2A2	0.3567	0.346558	0.351607	0.301837	0.285217	0.300672	0.272211	0.258913	0.261759	0.334174	0.29406	0.288963	0.290583	0.309812	0.267114	0.32271	0.208496	0.286019	0.411695	0.352387	0.368885
AP2B1	0.420468	0.409875	0.409497	0.451836	0.446663	0.452237	0.407981	0.400639	0.403727	0.448953	0.458688	0.451185	0.38617	0.446847	0.416258	0.48383	0.412311	0.416258	0.452439	0.443505	0.448691
AP2M1	0.301102	0.303098	0.294931	0.320858	0.315608	0.320858	0.285653	0.281041	0.296283	0.326856	0.328435	0.311228	0.407461	0.373319	0.345601	0.303814	0.289969	0.332927	0.273228	0.301139	0.221677
AP2S1	0.468427	0.46562	0.463842	0.41485	0.426594	0.416723	0.373661	0.385095	0.393542	0.156546	0.175338	0.228743	0.195046	0.243796	0.292483	0.182889	0.127798	0.0945207	0.131689	0.174495	0.176581
AP3B1	0.285653	0.286062	0.284583	0.262717	0.267629	0.269168	0.25346	0.248806	0.252452	0.246392	0.263923	0.260784	0.245169	0.234484	0.216888	0.198047	0.204898	0.228146	0.23835	0.238107	0.28161
AP3D1	0.306855	0.302267	0.305861	0.275581	0.280509	0.28	0.26278	0.250057	0.254583	0.307579	0.298661	0.305288	0.285534	0.248498	0.254678	0.362348	0.37908	0.401404	0.331983	0.308593	0.394485
AP3M1	0.162446	0.160388	0.15266	0.16597	0.150112	0.171255	0.140303	0.137427	0.137544	0.199192	0.212475	0.226029	0.157238	0.149704	0.133885	0.205307	0.278015	0.236291	0.261477	0.261365	0.229511
AP3M2	0.0919312	0.0838305	0.0834279	-0.240792	-0.0246247	-0.0564142	-0.0110883	-0.0189961	-0.00797977	NA	NA	NA	NA	NA	NA	NA	NA	NA	NA	NA	NA
AP3S1	0.2962	0.2916	0.283421	0.324715	0.338	0.328081	0.269793	0.271216	0.276751	0.163057	0.159943	0.180779	0.152174	0.167436	0.208165	0.0630082	0.110669	0.108169	0.0715425	0.0947362	0.157747
AP3S2	0.0861965	0.0926476	0.0606372	-0.0344964	-0.0209204	-0.0336601	0.0855727	0.0870671	0.0883435	NA	NA	NA	NA	NA	NA	NA	NA	NA	NA	NA	NA
AP4B1	0.0370076	0.0327421	0.0314819	0.117321	0.110325	0.11192	0.0810939	0.0930194	0.103498	NA	NA	NA	NA	NA	NA	NA	NA	NA	NA	NA	NA
AP4E1	-0.0275701	-0.0344964	-0.0391192	0.0596315	0.0630089	0.0613809	0.0589446	0.0590964	0.0502	NA	NA	NA	NA	NA	NA	NA	NA	NA	NA	NA	NA
AP4M1	0.0872213	0.0931945	0.0922287	0.0626209	0.049154	0.0575579	0.0657525	0.0555703	0.0527762	NA	NA	NA	NA	NA	NA	NA	NA	NA	NA	NA	NA
AP4S1	0.125865	0.0688085	0.00742785	-0.0659666	-0.0189961	-0.0484122	0.0407133	0.0270656	0.0165387	0.0329271	0.00661797	-0.048564	-0.0256461	-0.165744	-1.26189	-0.658058	-1.26193	-1.26194	0.00661797	-1.26189	-1.26191
AP5B1	0.0809107	0.0717987	0.0730903	-0.245134	-0.245783	-0.357168	0.0123925	0.00871719	0.00129019	-0.657829	-0.864981	-0.362131	-1.26194	-1.26193	-1.26189	-1.26195	-1.26193	-1.26194	-1.26192	-1.26189	-1.26191
AP5M1	-1.26197	-1.26197	-1.26197	-0.150758	-0.23907	-0.149321	-0.0333323	-0.0281733	-0.0381793	NA	NA	NA	NA	NA	NA	NA	NA	NA	NA	NA	NA
AP5S1	0.0212548	-0.0187645	-1.26197	2.07679e-06	-0.0131901	-0.00821349	-0.447975	-0.054908	-0.0472741	-1.26195	-1.26195	-1.26195	-1.26194	-1.26193	-1.26189	-0.0403441	-0.0149849	-1.26194	-1.26192	-1.26189	-1.26191
AP5Z1	0.0665941	0.0588623	0.0609286	-0.85905	-0.65971	-0.767528	-0.448506	-0.45991	-0.450565	-1.26195	0.0270148	-1.26195	-0.675301	-1.26193	-1.26189	0.0214047	0.036645	0.138685	-1.26192	-1.26189	0.00641037
APAF1	0.216057	0.21564	0.208813	0.253371	0.257778	0.260915	0.152219	0.149438	0.163719	0.117025	0.130474	0.0862326	0.0270148	0.0749687	0.00733688	-1.26195	0.183709	-1.26194	-1.26192	-0.0468124	-1.26191
APBA3	0.0106929	-0.0262164	-0.15923	-1.26191	-1.26191	-1.2619	0.044782	0.0513563	0.0750055	NA	NA	NA	NA	NA	NA	NA	NA	NA	NA	NA	NA
APBB1IP	0.460587	0.452237	0.443729	0.376569	0.386912	0.38627	0.37277	0.377661	0.377981	0.395396	0.367593	0.39388	0.377954	0.436121	0.432855	0.369557	0.341153	0.337145	0.285699	0.233198	0.302722
APEH	0.396562	0.387289	0.382657	0.376998	0.370833	0.375622	0.304992	0.305802	0.318191	0.343568	0.371138	0.377271	0.393168	0.342409	0.358226	0.304396	0.337368	0.342917	0.32892	0.35365	0.361408
APEX1	1.1046	1.07027	1.09692	0.519206	0.523351	0.512926	0.861472	0.873879	0.872585	0.906359	0.918338	0.93504	0.730545	0.931488	0.879696	0.879696	0.698545	0.910785	1.11401	0.692788	1.13735
APEX2	-0.463039	-0.648528	-0.645118	0.0552777	0.0534785	0.0544516	0.0535723	0.0476714	0.0286738	NA	NA	NA	NA	NA	NA	NA	NA	NA	NA	NA	NA
APH1A	-1.26184	-1.26184	-1.16479	0.187745	0.202861	0.19377	0.159174	0.155687	0.141329	NA	NA	NA	NA	NA	NA	NA	NA	NA	NA	NA	NA
API5	0.682448	0.651884	0.653413	0.474408	0.478323	0.473777	0.549963	0.539399	0.537331	0.591177	0.433374	0.558571	0.421134	0.424507	0.427342	0.397079	0.405784	0.4047	0.423211	0.343724	0.402036
APIP	0.329237	0.337679	0.329063	0.29849	0.299254	0.305398	0.302267	0.326356	0.321266	0.157499	0.156875	0.162078	0.307579	0.259041	0.255769	0.128532	0.109228	0.153727	0.0953995	0.147755	0.107535
APITD1	-1.26185	-1.26184	-1.26184	0.107619	0.105681	0.104367	-0.0177383	-0.0256521	-0.0580941	NA	NA	NA	NA	NA	NA	NA	NA	NA	NA	NA	NA
APLF	0.0772876	0.088948	0.0872875	-0.660201	-0.659163	-0.663046	-0.25873	-0.245134	-0.245505	NA	NA	NA	NA	NA	NA	NA	NA	NA	NA	NA	NA
APLP2	-1.26197	-1.26197	-1.26197	-1.26185	-1.26184	-1.26185	-1.26189	-1.2619	-1.2619	NA	NA	NA	NA	NA	NA	NA	NA	NA	NA	NA	NA
APMAP	0.353135	0.348443	0.351071	0.220571	0.239117	0.223719	0.304476	0.297463	0.29657	0.468175	0.439453	0.445034	0.413565	0.496591	0.451185	0.441861	0.480975	0.458178	0.329335	0.361027	0.371968
APOA1BP	0.0468353	0.0618451	0.0549808	0.146976	0.130545	0.157219	0.0770147	0.134521	0.0809639	NA	NA	NA	NA	NA	NA	NA	NA	NA	NA	NA	NA
APOB	-1.26188	-1.26188	-1.26187	-0.469269	-0.447197	-0.457558	0.0280086	-0.0119081	0.0337524	-1.26195	-1.26195	-1.26195	0.0725848	-1.26193	-1.26189	0.290251	0.243946	0.282718	0.303814	0.340248	0.306246
APOBEC3H	0.349526	0.343884	0.344734	0.544886	0.546669	0.539935	0.387703	0.380367	0.40264	NA	NA	NA	NA	NA	NA	NA	NA	NA	NA	NA	NA
APOBR	-0.652036	-0.648693	-0.648779	0.166623	0.175724	0.169291	-1.26187	-1.26188	-1.26188	0.0953995	0.164439	0.117244	0.225545	0.127892	0.0837551	0.0906123	0.0408714	-0.642542	-0.0516849	-1.26189	-1.26191
APOO	0.288664	0.304591	0.311316	0.338987	0.328081	0.338884	0.294411	0.322292	0.284921	0.0796096	0.0867295	0.17181	0.0722935	0.095687	0.153437	0.0429877	-0.248115	-0.0669751	0.0832647	0.0780471	-1.26191
APOOL	0.369371	0.364468	0.367661	0.290741	0.294136	0.289044	0.287951	0.304808	0.2962	0.262429	0.247095	0.266674	0.274778	0.219773	0.234484	0.224382	0.198395	0.206672	0.133329	0.0807539	0.160869
APPBP2	-0.00469234	-0.00548811	0.000954436	-0.0434835	-0.0672698	-0.0675774	-0.248458	-0.25217	-0.0592538	NA	NA	NA	NA	NA	NA	NA	NA	NA	NA	NA	NA
APPL1	0.293409	0.284359	0.280688	0.29518	0.294411	0.297932	0.29363	0.292428	0.309535	0.2728	0.29717	0.246699	0.32606	0.24992	0.210287	0.208254	0.290079	0.232826	0.224153	0.139004	0.188844
APPL2	-1.26187	-1.26187	-1.26187	-1.26198	-1.26198	-1.26198	-1.26189	-1.26187	-1.26187	NA	NA	NA	NA	NA	NA	NA	NA	NA	NA	NA	NA
APRT	0.357478	0.361208	0.348871	0.685734	0.658393	0.673914	0.492525	0.475255	0.495741	0.556974	0.584972	0.571171	0.490321	0.558571	0.705266	0.591996	0.59553	0.540832	0.563931	0.663546	0.59553
APTX	0.0316569	0.0316569	0.0211249	-0.966898	-1.16508	-1.26183	-1.26198	-1.26198	-1.26198	NA	NA	NA	NA	NA	NA	NA	NA	NA	NA	NA	NA
AQP9	-1.26197	-1.26197	-1.26197	0.0789934	0.0876275	0.0835076	-1.26198	-1.26198	-1.26198	NA	NA	NA	NA	NA	NA	NA	NA	NA	NA	NA	NA
AQR	0.349625	0.340571	0.341467	0.282142	0.283351	0.281243	0.325364	0.322175	0.316183	0.204062	0.217399	0.232701	0.232599	0.21236	0.205626	0.233945	0.184567	0.247667	0.299894	0.250149	0.323898
ARAF	0.282426	0.282142	0.271912	0.239357	0.248889	0.238741	0.250625	0.243064	0.246065	0.0490046	0.0526871	0.0607275	0.146878	0.152245	0.000712746	-0.651127	0.0582096	0.0407519	0.0351568	-0.0240077	0.0452319
ARAP1	0.167174	0.160249	0.161005	0.105313	0.108341	0.107913	0.108718	0.101777	0.108201	0.16342	0.237471	0.144396	0.207301	0.156009	0.143367	0.0982482	0.138685	0.0893649	0.223559	0.120116	0.239505
ARAP2	-0.00390394	0.00558292	-0.00469234	0.0279089	0.0304121	0.0279089	0.00139486	0.012474	0.0270142	NA	NA	NA	NA	NA	NA	NA	NA	NA	NA	NA	NA
ARCN1	0.508359	0.495489	0.495002	0.532954	0.528176	0.530208	0.504314	0.49231	0.49231	0.461131	0.46957	0.462145	0.480975	0.487246	0.48605	0.502771	0.523583	0.504059	0.508521	0.486872	0.479541
AREL1	-0.353954	-0.44977	-0.272819	-1.26196	-1.26197	-1.26196	-0.444901	-0.450565	-0.468663	NA	NA	NA	NA	NA	NA	NA	NA	NA	NA	NA	NA
ARF1	1.07839	1.0319	1.02333	0.897796	0.855631	0.880034	0.946756	0.94154	0.873879	0.47098	0.438279	0.418639	0.453707	0.380839	0.381505	0.572796	0.558571	0.53069	0.435504	0.441003	0.443958
ARF3	-1.26197	-1.26197	-1.26197	0.0188942	-0.350648	0.0155169	-1.26198	-1.26198	-1.26198	NA	NA	NA	NA	NA	NA	NA	NA	NA	NA	NA	NA
ARF4	0.324892	0.322791	0.318003	0.348007	0.327366	0.34333	0.393026	0.392871	0.387812	0.0504519	0.000161449	-1.26195	0.0449853	0.16966	-1.26189	-0.0024716	0.0623644	0.0682864	0.149973	0.251979	0.214041
ARF5	0.775207	0.79016	0.780898	0.594708	0.592807	0.590501	0.574047	0.574047	0.546669	0.3994	0.403126	0.38033	0.494107	0.391424	0.405125	0.46957	0.476908	0.505362	0.444164	0.423471	0.419624
ARF6	0.347353	0.345489	0.314099	0.551149	0.5285	0.546013	0.316746	0.292	0.307265	0.316289	0.268102	0.308948	0.309067	0.284394	0.263923	0.315746	0.345785	0.324067	0.317097	0.272216	0.288511
ARFGAP1	0.288904	0.288417	0.2873	0.292968	0.297546	0.29849	0.30561	0.306636	0.295775	0.0940686	0.130703	0.120227	0.150115	0.144202	0.126713	-1.26195	0.0823483	0.131974	0.102279	0.150895	0.107784
ARFGAP2	0.329703	0.328433	0.327861	0.338777	0.344853	0.339596	0.40768	0.389699	0.384677	0.175882	0.172676	0.170719	0.21315	0.216453	0.237008	0.19493	0.272101	0.262318	0.220968	0.237197	0.196711
ARFGAP3	0.0382254	0.0428869	0.0282316	0.177278	0.182423	0.188649	0.0675754	0.0829561	0.0933115	0.0864681	0.104813	-0.000735989	0.187734	0.0780471	0.0482945	0.190654	0.188721	0.0354377	-0.00202748	-0.00776754	-1.26191
ARFGEF1	0.175946	0.167174	0.167953	0.189747	0.194011	0.192738	0.132364	0.129054	0.13025	0.154405	0.238935	0.181248	0.176244	0.201818	0.178319	0.0523201	0.0493526	0.176244	0.195763	0.209643	0.173645
ARFGEF2	0.130935	0.125613	0.126848	0.110953	0.110868	0.113435	0.119048	0.118305	0.126782	0.0827798	0.0560661	0.131882	-0.648578	0.147656	0.10282	0.0220827	-0.166703	-0.254443	-1.26192	0.101734	-1.26191
ARFIP1	0.362533	0.361752	0.363239	0.252387	0.244141	0.251883	0.2916	0.302585	0.324498	0.0849876	0.135194	0.0776001	-0.053965	0.0346289	-1.26189	0.0476565	-1.26193	-0.00145209	0.170719	0.19537	0.200194
ARFIP2	0.0254612	0.0360529	0.0402735	0.0653886	0.071511	0.0663646	0.0756848	0.0862705	0.0882757	-0.059604	-0.243113	-0.0379706	-0.241095	-0.558983	-1.26189	-1.26195	-1.26193	-0.261337	0.0114064	-0.0235171	0.0525638
ARFRP1	0.235297	0.23356	0.239448	0.0947919	0.0797209	0.0912553	0.127687	0.118871	0.104886	-1.26195	-1.26195	-0.860719	-1.26194	-1.26193	-1.26189	-0.249075	-0.376958	-0.0456489	-0.363645	-1.26189	-0.249665
ARGLU1	0.47999	0.470259	0.472486	0.41566	0.400639	0.407819	0.418411	0.420186	0.434824	0.257137	0.238571	0.259962	0.291006	0.269036	0.271683	0.167818	0.183983	0.176484	0.195563	0.140954	0.227019
ARHGAP1	0.642386	0.631956	0.644758	0.462087	0.453082	0.467422	0.4728	0.46539	0.463585	0.391936	0.400094	0.3994	0.402625	0.37095	0.401186	0.378138	0.368885	0.381687	0.389402	0.402625	0.376349
ARHGAP10	-0.0395166	-0.0364539	-0.0252378	0.058765	0.0600643	0.0607333	-0.64261	-0.35784	-0.642513	NA	NA	NA	NA	NA	NA	NA	NA	NA	NA	NA	NA
ARHGAP11A	-1.26185	-1.26185	-1.26184	0.126025	0.124187	0.122898	-1.26198	-1.26198	-1.26198	NA	NA	NA	NA	NA	NA	NA	NA	NA	NA	NA	NA
ARHGAP12	0.043914	0.0399931	0.0389156	0.0419992	0.0450127	0.0404993	-0.0159833	-0.0117399	-0.00605463	NA	NA	NA	NA	NA	NA	NA	NA	NA	NA	NA	NA
ARHGAP15	0.452577	0.45005	0.450629	0.250305	0.238505	0.241813	0.254274	0.252893	0.251789	0.168028	0.139563	0.143838	0.147086	0.171994	0.131299	0.166263	0.130378	0.125894	0.150115	0.137632	0.208496
ARHGAP17	0.22814	0.220163	0.219799	0.147632	0.143729	0.149536	0.25233	0.237143	0.248307	0.276203	0.275471	0.257533	0.261867	0.225545	0.200831	0.241211	0.325258	0.213832	0.122591	0.133885	0.115416
ARHGAP18	0.194724	0.193648	0.189906	0.320251	0.300092	0.311943	-0.0071929	-0.00605463	-0.0071929	NA	NA	NA	NA	NA	NA	NA	NA	NA	NA	NA	NA
ARHGAP19	-1.26197	-1.26197	-1.26197	-1.26184	-0.513312	-0.962577	-1.26198	-1.26198	-1.26198	NA	NA	NA	NA	NA	NA	NA	NA	NA	NA	NA	NA
ARHGAP21	-1.26197	-1.26197	-1.26197	-0.658935	-0.652912	-0.767978	-1.26198	-1.26198	-1.26198	NA	NA	NA	NA	NA	NA	NA	NA	NA	NA	NA	NA
ARHGAP25	0.467011	0.460398	0.463155	0.304109	0.305802	0.298029	0.302687	0.309241	0.308399	0.534222	0.528645	0.53069	0.516493	0.459035	0.447249	0.451878	0.444717	0.434652	0.380657	0.371968	0.40241
ARHGAP26	0.269168	0.264639	0.262283	0.222468	0.23122	0.225313	0.0974349	0.105424	0.11407	NA	NA	NA	NA	NA	NA	NA	NA	NA	NA	NA	NA
ARHGAP27	0.263185	0.26044	0.257008	0.179654	0.186152	0.181575	0.0897592	0.0997163	0.10879	0.0616245	0.0926234	0.0873416	0.194626	-0.00163187	0.075647	0.0478734	0.0344722	0.0913226	-0.272782	-1.26189	-1.26191
ARHGAP30	0.347112	0.325826	0.331606	0.33342	0.35346	0.338684	0.252177	0.258684	0.260668	0.349463	0.359967	0.372837	0.322319	0.351218	0.364251	0.223559	0.252413	0.224878	0.183382	0.213832	0.196996
ARHGAP31	-0.0311882	-0.0350763	-0.0468464	-0.962737	-0.968466	-0.962641	0.00795797	-0.010616	-0.0140274	-0.0223463	-0.959129	-0.269065	0.0335992	0.120872	0.147656	0.0851055	0.0844116	0.110669	0.098108	0.126624	0.0793895
ARHGAP39	-1.26197	-1.26197	-1.26197	-0.646883	-0.684858	-0.657616	-0.45784	-0.559863	-0.66628	NA	NA	NA	NA	NA	NA	NA	NA	NA	NA	NA	NA
ARHGAP4	0.475863	0.463585	0.465191	0.329913	0.327051	0.329799	0.268924	0.280273	0.28247	0.447837	0.424038	0.452439	0.426264	0.437091	0.419365	0.346355	0.358729	0.378715	0.339081	0.292483	0.345462
ARHGAP5	-0.261543	-0.350943	-0.35375	-1.262	-1.262	-1.262	-0.454073	-0.449239	-0.257507	0.0249013	-0.0216109	-1.26195	0.0423973	-0.240059	-1.26189	-1.26195	-1.26193	-1.26194	-1.26192	-1.26189	-1.26191
ARHGAP9	0.396993	0.383344	0.393929	0.312346	0.314099	0.311028	0.292329	0.291368	0.291695	0.302569	0.340967	0.338628	0.267584	0.303814	0.329211	0.259903	0.217323	0.315746	0.232701	-0.053965	0.229042
ARHGDIA	2.21219	2.25684	2.37123	2.13338	2.09875	2.09875	1.7653	2.09875	2.0183	1.11401	1.06357	1.02719	1.28307	0.901995	1.0149	0.786536	0.782244	0.780404	0.661122	0.645897	0.689469
ARHGDIB	4.71088	4.71088	5.2588	2.09875	2.21219	2.18925	3.11622	3.29736	3.05206	2.03881	1.94533	1.99339	2.86427	2.18641	2.32006	1.7178	2.1155	1.80152	1.31381	1.29384	1.38932
ARHGEF1	0.787677	0.770671	0.768169	0.569416	0.569675	0.563548	0.560655	0.575056	0.569675	NA	NA	NA	NA	NA	NA	NA	NA	NA	NA	NA	NA
ARHGEF11	0.0782638	0.0671043	0.0709449	-1.26197	-1.26197	-1.26197	-0.16221	-0.149483	-0.0571059	0.119739	0.147392	0.159405	0.304265	0.290857	0.257425	0.170548	0.212247	0.141544	-0.00550446	-0.00346693	-0.0317199
ARHGEF12	-1.26188	-1.26189	-1.26189	-1.26183	-1.1054	-1.16524	-0.768737	-0.858364	-0.86461	NA	NA	NA	NA	NA	NA	NA	NA	NA	NA	NA	NA
ARHGEF18	0.316574	0.310754	0.313044	0.0658411	0.0640059	0.0551418	0.145762	0.149848	0.152219	0.365841	0.342611	0.36387	0.332127	0.300663	0.303096	0.25937	0.258405	0.207665	0.237008	0.181248	0.273905
ARHGEF2	0.359356	0.35325	0.349405	0.414311	0.426392	0.419182	0.374205	0.369239	0.373226	0.313641	0.31257	0.307719	0.322985	0.305764	0.29406	0.383856	0.319245	0.344126	0.379283	0.388523	0.39388
ARHGEF3	0.0758782	0.0828134	0.0860196	0.00676694	-0.0313291	0.00633509	0.0203299	0.00378198	0.00624007	NA	NA	NA	NA	NA	NA	NA	NA	NA	NA	NA	NA
ARHGEF6	0.45871	0.452914	0.452738	0.43516	0.432853	0.431816	0.324006	0.323562	0.325753	0.364542	0.352798	0.371138	0.405125	0.364542	0.352387	0.346871	0.3538	0.350926	0.306718	0.323718	0.256704
ARHGEF7	0.337569	0.331606	0.328856	0.236868	0.232526	0.23731	0.287389	0.289044	0.296877	0.270408	0.271277	0.250297	0.216453	0.236291	0.242572	0.241459	0.258476	0.275618	0.161043	0.217399	0.135579
ARID1A	0.292788	0.281348	0.284752	0.230811	0.234933	0.234047	0.278807	0.274245	0.26611	0.233474	0.258868	0.243537	0.206053	0.23162	0.225545	0.18991	0.246699	0.238694	0.198644	0.248964	0.209643
ARID1B	0.234157	0.215358	0.215433	0.200744	0.202172	0.207388	0.217717	0.21641	0.226262	0.159082	0.146984	0.0953995	0.098108	-0.0194991	0.0308809	-1.26195	0.0913226	0.119456	0.0439607	-1.26189	0.020756
ARID2	0.137954	0.124977	0.129714	0.0812715	0.0848662	0.0813671	0.0893274	0.0878326	0.0918159	0.137336	0.09553	0.100956	0.108235	0.0580093	0.100357	-1.26195	-0.245553	-0.0660236	-1.26192	-1.26189	-0.0384181
ARID3A	-0.448855	-0.465984	-0.452575	0.0727963	0.0778446	0.0733576	-0.150099	-0.030888	0.0054682	NA	NA	NA	NA	NA	NA	NA	NA	NA	NA	NA	NA
ARID3B	0.0453316	0.040983	0.024869	-1.26185	-1.26184	-1.26183	0.0467573	0.0506872	0.053147	-1.26195	-1.26195	-1.26195	-1.26194	-1.26193	-1.26189	0.00215514	0.0278309	-0.029829	0.0786819	-1.26189	0.116925
ARID4A	0.233716	0.230034	0.222653	0.149357	0.154931	0.146002	0.192373	0.18575	0.186678	0.073484	0.0936578	0.182534	0.127798	0.328764	0.088537	0.000890864	0.036836	0.0868492	0.344983	0.245767	0.254435
ARID4B	0.191815	0.184341	0.183319	-0.00169754	0.00311202	-0.00297085	0.0803309	0.0898709	0.0874493	0.109614	0.122212	-0.0388402	0.172388	0.115315	0.0227401	0.143759	0.159405	0.122317	0.121188	0.125005	0.193819
ARID5A	0.0134274	0.0204323	0.0266587	0.050312	0.0603651	0.0520176	-1.16499	-0.971159	-0.960789	NA	NA	NA	NA	NA	NA	NA	NA	NA	NA	NA	NA
ARID5B	0.00269397	0.0049421	0.0111324	-1.26186	-1.26184	-1.26186	-0.964104	-0.677558	-0.675337	NA	NA	NA	NA	NA	NA	NA	NA	NA	NA	NA	NA
ARIH1	0.358151	0.350699	0.359593	0.319756	0.318526	0.323779	0.368092	0.362412	0.370201	0.238461	0.258693	0.240758	0.214251	0.197776	0.193713	0.115893	0.153928	0.141011	0.0806192	0.133187	0.0742709
ARIH2	0.271824	0.273133	0.275794	0.193845	0.204955	0.204846	0.286398	0.288053	0.288904	0.0851055	0.0177787	0.13159	0.126713	0.126431	0.123699	0.091761	0.0749687	0.154639	0.167035	0.020756	0.0298239
ARL1	0.417446	0.408769	0.396217	0.369499	0.418668	0.407195	0.35368	0.343466	0.330626	0.16956	0.177549	0.177255	0.00767459	-0.0472146	-1.26189	0.165374	0.222577	0.256423	0.293213	0.24463	0.239366
ARL13B	-0.0666306	-0.244721	-0.241343	-1.262	-1.262	-1.262	-1.26191	-1.26191	-1.26191	NA	NA	NA	NA	NA	NA	NA	NA	NA	NA	NA	NA
ARL14EP	0.204235	0.213556	0.204235	0.117483	0.0897592	0.100313	0.130316	0.116896	0.127349	NA	NA	NA	NA	NA	NA	NA	NA	NA	NA	NA	NA
ARL15	-0.210148	-0.158113	-0.038462	-0.858211	-1.26183	-0.964663	-0.463039	-0.449474	-0.455707	NA	NA	NA	NA	NA	NA	NA	NA	NA	NA	NA	NA
ARL17A	0.173464	0.194167	0.188782	0.0408568	0.0166436	0.033596	-1.26198	-1.26198	-1.26198	NA	NA	NA	NA	NA	NA	NA	NA	NA	NA	NA	NA
ARL2	0.301399	0.29815	0.303768	0.261343	0.275229	0.268137	0.350605	0.3567	0.353768	-0.0278853	-1.26195	-1.26195	0.0123833	-0.0554642	-1.26189	0.00800978	0.145955	0.0840573	0.20126	0.173751	0.168769
ARL2BP	0.103559	0.119378	0.119627	0.238887	0.249215	0.241664	-1.26198	-1.26198	-1.26198	-0.244755	-0.647869	-1.26195	0.0677367	-0.0607236	0.0573054	-1.26195	-1.26193	-1.26194	-1.26192	-1.26189	-1.26191
ARL3	0.259665	0.265111	0.249284	0.388591	0.400752	0.391382	0.226003	0.234824	0.239619	0.0855112	0.0997593	0.0774471	-0.35713	-1.26193	-1.26189	0.0827798	0.14619	0.190826	0.248142	0.067093	0.231735
ARL4C	-0.00834105	-0.0149604	-0.00368098	0.0683817	0.0546756	0.0568851	-1.26198	-1.26198	-1.26198	NA	NA	NA	NA	NA	NA	NA	NA	NA	NA	NA	NA
ARL5A	0.0327421	0.0245841	0.00812992	-0.655126	-0.64411	-0.658462	0.0221496	0.00568435	0.00187608	NA	NA	NA	NA	NA	NA	NA	NA	NA	NA	NA	NA
ARL5B	-1.26197	-1.26197	-1.26197	-1.262	-1.262	-1.262	-0.662491	-0.477594	-0.650084	NA	NA	NA	NA	NA	NA	NA	NA	NA	NA	NA	NA
ARL5C	-0.0132828	-0.0113404	-0.0135057	-1.262	-1.262	-1.262	-1.26198	-1.26198	-1.26198	NA	NA	NA	NA	NA	NA	NA	NA	NA	NA	NA	NA
ARL6	-0.965037	-0.966585	-1.26185	0.201608	0.188013	0.19915	0.0356585	0.0372864	0.0290064	NA	NA	NA	NA	NA	NA	NA	NA	NA	NA	NA	NA
ARL6IP1	0.401708	0.394984	0.39458	0.597661	0.585067	0.611733	0.419182	0.422329	0.42986	NA	NA	NA	NA	NA	NA	NA	NA	NA	NA	NA	NA
ARL6IP4	0.308208	0.310558	0.304898	0.205017	0.205236	0.208368	0.121482	0.125182	0.121482	0.229206	0.190751	0.206217	0.200194	0.17975	0.209531	0.148619	0.0363428	0.120471	0.17064	0.11253	0.17975
ARL6IP5	0.706672	0.700316	0.688983	0.481066	0.493525	0.474008	0.44034	0.454169	0.454552	0.464208	0.462796	0.46244	0.468779	0.493246	0.460213	0.48768	0.517775	0.470642	0.41985	0.420068	0.43677
ARL6IP6	0.142918	0.133465	0.125424	0.18983	0.18759	0.182595	-0.0144949	-0.011589	-0.00688328	0.0285088	0.00520209	-0.0122958	0.104069	0.137236	0.156171	-1.26195	0.0515936	-0.0247211	-0.0669751	-1.26189	-1.26191
ARL8A	0.375622	0.377147	0.375941	0.288664	0.288979	0.290119	0.277612	0.279779	0.279079	0.269791	0.144673	0.268826	0.276923	0.223422	0.190654	0.229932	0.228146	0.267237	0.343048	0.352175	0.394661
ARL8B	0.495489	0.495002	0.515275	0.561819	0.583022	0.572989	0.566481	0.552784	0.553738	0.115761	0.169972	0.129594	0.0598791	0.157094	0.121344	0.111995	0.135076	0.151605	0.123179	0.0851055	0.0798991
ARMC1	0.044782	0.0461025	0.0362653	0.0915834	0.0875694	0.0829124	0.123484	0.138202	0.120285	-0.357634	-0.0120383	-0.0227133	0.0468842	0.0948588	-1.26189	0.100601	0.144202	0.0920926	-0.0237807	-1.26189	0.00277897
ARMC10	0.481457	0.48586	0.488902	0.236649	0.228617	0.230811	0.344734	0.343808	0.342599	-0.643839	0.121011	0.0393887	0.100491	-1.26193	0.013887	0.101997	0.0740614	0.178976	0.153852	0.0245725	0.0725848
ARMC5	-0.857736	-0.960598	-0.675337	-1.26199	-1.26199	-1.26199	-1.16465	-1.26184	-1.26185	NA	NA	NA	NA	NA	NA	NA	NA	NA	NA	NA	NA
ARMC6	0.25076	0.244141	0.250214	0.276751	0.264933	0.275667	0.343181	0.325826	0.324715	-0.251514	-1.16424	-0.35268	0.0814863	0.125216	0.171907	-1.26195	-1.26193	-0.0468124	0.168212	0.221327	0.167436
ARMC8	0.338684	0.335419	0.330743	0.21102	0.214656	0.210541	0.31709	0.308668	0.310411	-0.35713	-1.26195	-1.26195	0.0895112	0.0408714	-0.0218401	0.0747528	0.160638	0.0944137	0.0330997	0.0195155	0.0570306
ARMC9	-0.662067	-0.654999	-0.658227	-1.262	-1.262	-1.262	0.0176299	0.00698856	-0.00648977	NA	NA	NA	NA	NA	NA	NA	NA	NA	NA	NA	NA
ARMCX3	-1.26183	-1.16495	-1.17976	-1.26187	-1.26188	-1.26188	0.0254015	0.00832742	0.0236155	-1.26195	-1.26195	-1.26195	-1.26194	-1.26193	-1.26189	-1.26195	-1.26193	-0.46598	-0.137292	-1.26189	0.024805
ARMCX4	-0.671069	-0.856375	-0.668881	-0.0122542	-0.0207293	-0.030198	-1.26191	-1.26191	-1.2619	NA	NA	NA	NA	NA	NA	NA	NA	NA	NA	NA	NA
ARMH3	0.156179	0.155767	0.161374	0.0979794	0.0990825	0.0960146	0.111354	0.0961028	0.09762	-0.864981	-1.26195	-0.00544859	-0.455186	-1.26193	-1.26189	-0.560395	-1.26193	-0.0321256	0.102373	0.143241	0.204644
ARMT1	0.281725	0.272211	0.273949	0.182821	0.178163	0.17758	0.290656	0.300244	0.308495	0.174633	0.186524	0.205512	-0.0295895	-0.254443	-1.26189	0.0303887	0.127994	0.110924	0.15291	0.0950868	0.143838
ARNT	0.0820503	0.0751342	0.0666514	0.0770504	0.0751342	0.0751934	0.196992	0.209778	0.221525	NA	NA	NA	NA	NA	NA	NA	NA	NA	NA	NA	NA
ARNTL	-1.26197	-1.26197	-1.26197	-1.16689	-1.26186	-1.26184	-1.26198	-1.26198	-1.26198	NA	NA	NA	NA	NA	NA	NA	NA	NA	NA	NA	NA
ARPC1A	0.30876	0.30424	0.301313	0.334229	0.333747	0.341175	0.210751	0.199676	0.21641	0.121801	0.095197	0.123179	0.0195155	0.135194	0.0888724	0.180068	-1.26193	0.120351	0.0815825	0.143678	0.17672
ARPC1B	0.866101	0.885781	0.861472	0.827679	0.861472	0.853734	0.827679	0.827679	0.804307	1.32485	1.34396	1.29384	1.41463	1.40038	1.42894	0.929113	0.898697	0.815558	0.701794	0.762875	0.727977
ARPC2	1.68739	1.61236	1.68739	0.855631	0.946756	0.891375	0.891375	0.857431	0.84465	0.952333	0.983058	0.995151	0.974494	0.870962	0.901995	0.703718	0.609137	0.575246	0.598735	0.576815	0.577734
ARPC3	0.499827	0.546013	0.556401	0.52984	0.498393	0.53826	0.206503	0.325078	0.267452	1.00999	1.02719	1.06357	0.818689	0.823588	0.844619	0.71774	0.710535	0.642651	0.744363	0.77118	0.76913
ARPC4	1.18372	1.17779	1.29757	0.979267	0.979267	0.955085	0.768169	0.769276	0.783598	0.892205	0.854873	0.854873	0.901995	0.760923	0.737705	0.598735	0.647017	0.706533	0.765032	0.804176	0.834888
ARPC5	0.805709	0.981741	0.964715	1.1916	1.15332	1.187	0.53826	0.613994	0.561143	0.661122	0.748325	0.668237	0.632965	0.62566	0.631967	0.515982	0.521473	0.515557	0.44632	0.471808	0.485054
ARPC5L	0.394453	0.456177	0.435951	0.668684	0.683452	0.669587	0.35336	0.407819	0.372059	0.381505	0.411407	0.384891	0.301764	0.257766	0.280731	0.3364	0.456695	0.506514	0.50005	0.483473	0.497171
ARPP19	0.0952318	0.108875	0.120285	0.317647	0.285882	0.318003	-1.26198	-1.26198	-1.26198	0.217399	0.216774	0.19797	0.0144442	0.162954	0.154325	-1.26195	-1.26193	-0.047572	0.0910423	0.129076	0.130868
ARRB1	0.374979	0.375622	0.374004	0.270549	0.24575	0.265394	0.327501	0.347112	0.357648	0.18351	0.177958	0.200456	0.231156	0.247285	0.2728	0.126905	0.107047	0.119882	0.0428347	0.124558	0.0861036
ARRB2	0.456177	0.452402	0.457153	0.399735	0.385095	0.4016	0.271753	0.268924	0.277883	0.265787	0.275819	0.251261	0.308014	0.299389	0.325933	0.24016	0.275819	0.329077	0.228063	0.209442	0.168409
ARRDC1	0.112515	0.11317	0.108277	0.0866663	0.0852828	0.0887371	0.0641048	0.0704155	0.0953628	NA	NA	NA	NA	NA	NA	NA	NA	NA	NA	NA	NA
ARSA	-1.26184	-1.26185	-1.26184	-1.26188	-1.26187	-1.26186	-1.26198	-1.26198	-1.26198	0.144021	0.179275	0.159494	0.238571	0.221897	0.218313	0.00568956	0.103135	0.052623	-1.26192	-1.26189	-1.26191
ARSB	0.0766228	0.0693185	0.0744425	0.192869	0.190782	0.190411	-1.26198	-1.26198	-1.26198	NA	NA	NA	NA	NA	NA	NA	NA	NA	NA	NA	NA
AS3MT	0.150654	0.159526	0.153842	-0.967658	-1.26187	-1.26187	0.119727	0.104669	0.119378	NA	NA	NA	NA	NA	NA	NA	NA	NA	NA	NA	NA
ASAH1	0.260668	0.256161	0.259063	0.259861	0.263573	0.266343	0.192125	0.175946	0.181454	0.148731	0.168887	0.187417	0.242219	0.147392	0.100133	0.187734	0.216029	0.18863	0.0874754	0.138263	0.150115
ASAP1	0.177817	0.175053	0.174242	-0.0160803	-0.0306383	-0.0191053	0.189987	0.18047	0.191492	0.180455	0.157161	0.155831	0.145955	0.113468	0.0551513	-0.00907057	0.151467	0.159082	-0.0252131	-0.00968164	-0.239509
ASB3	0.0767561	0.0744425	0.0680933	0.04301	0.0305208	0.0432358	0.0828707	0.0958627	0.112896	NA	NA	NA	NA	NA	NA	NA	NA	NA	NA	NA	NA
ASB6	-1.26197	-1.26197	-1.26197	0.133185	0.125288	0.131812	-0.0215567	-0.040355	-0.0555819	NA	NA	NA	NA	NA	NA	NA	NA	NA	NA	NA	NA
ASB8	-1.26197	-1.26197	-1.26197	-1.26199	-1.26199	-1.26199	-0.558621	-0.272819	-0.352246	NA	NA	NA	NA	NA	NA	NA	NA	NA	NA	NA	NA
ASCC1	0.111441	0.117483	0.109348	0.0644722	0.0630783	0.0633435	-0.00969851	-0.00457799	0.00897746	0.0604468	-0.258524	-0.661825	0.063314	-0.0111718	0.0338345	-1.26195	-1.26193	-0.473442	-0.0373907	-0.0568725	0.032079
ASCC2	0.181212	0.175912	0.176281	0.172644	0.176666	0.183496	0.138466	0.142156	0.148952	0.120744	-0.0551046	0.129779	0.0227401	0.0436889	0.143759	0.0785545	0.0514307	-0.0237807	0.0310252	-0.0185829	0.0483987
ASCC3	0.142156	0.137224	0.137486	0.0980282	0.09762	0.0953628	0.0845866	0.0765635	0.0750712	0.19537	0.163257	0.167035	0.280453	0.123496	0.0668229	0.234578	0.212133	0.174028	0.231735	0.246491	0.243064
ASF1A	0.234252	0.240964	0.237194	0.251485	0.250214	0.254035	0.392689	0.394162	0.40116	0.0845497	0.0657353	0.0693139	-1.26194	-1.26193	-1.26189	-1.26195	0.181582	0.183983	-1.26192	-1.26189	0.146878
ASF1B	0.109717	0.117653	0.107002	0.393264	0.376998	0.392529	0.173517	0.162499	0.169965	-1.26195	-1.26195	-1.26195	-1.26194	-1.26193	-1.26189	0.1073	-0.0660236	-1.26194	0.124869	0.158878	0.168251
ASH2L	0.358316	0.349405	0.349982	0.245835	0.230113	0.241583	0.250376	0.23645	0.23574	0.163537	0.153627	0.155923	0.15196	0.133474	0.177624	0.0771385	0.164082	0.0796643	0.0172771	-0.0558366	-1.26191
ASIC3	-1.26197	-1.26197	-1.26197	-1.262	-1.262	-1.262	-0.655126	-0.960598	-0.776046	NA	NA	NA	NA	NA	NA	NA	NA	NA	NA	NA	NA
ASL	0.407362	0.400639	0.405867	0.328755	0.340476	0.338476	0.259137	0.25536	0.258988	-0.017486	0.0298239	-0.572348	0.0146129	0.197589	-1.26189	-1.26195	0.0583521	-0.245361	-1.26192	-1.26189	-1.26191
ASNS	-1.26189	-1.26189	-1.26188	0.268633	0.249481	0.252723	0.0375794	0.0399057	0.109772	-0.959802	-1.06554	-1.26195	0.00185658	-0.245553	-0.0312298	0.358027	0.373561	0.381505	0.38257	0.332733	0.366209
ASNSD1	-0.0349538	-0.0411194	-0.0370673	-1.06932	-1.1643	-1.17976	0.0262291	0.0246738	0.0289501	NA	NA	NA	NA	NA	NA	NA	NA	NA	NA	NA	NA
ASPH	0.048958	0.0693813	0.0596315	-0.453751	-0.363062	-0.447509	-0.662717	-0.663443	-0.462601	NA	NA	NA	NA	NA	NA	NA	NA	NA	NA	NA	NA
ASPM	-1.2619	-1.2619	-1.26189	0.024869	0.0233764	0.0270142	-0.0052244	-1.26198	0.0216609	NA	NA	NA	NA	NA	NA	NA	NA	NA	NA	NA	NA
ASPSCR1	0.354812	0.34364	0.347885	0.290942	0.296463	0.297091	0.218289	0.213195	0.216955	0.143367	0.192039	0.110113	0.0867295	0.115515	0.142273	0.0071726	0.130786	0.0303887	0.0932778	-1.26189	0.117025
ASRGL1	0.236138	0.253679	0.264573	0.201947	0.174676	0.187745	0.203203	0.197573	0.189906	NA	NA	NA	NA	NA	NA	NA	NA	NA	NA	NA	NA
ASS1	0.837841	0.84465	0.835154	0.67314	0.662197	0.674881	0.432505	0.433203	0.437299	NA	NA	NA	NA	NA	NA	NA	NA	NA	NA	NA	NA
ASUN	0.314681	0.307158	0.303844	0.249148	0.249885	0.246537	0.278163	0.275484	0.280181	NA	NA	NA	NA	NA	NA	NA	NA	NA	NA	NA	NA
ASXL1	-1.26187	-1.26186	-1.26186	-1.26191	-1.26191	-1.26192	-0.959789	-0.688514	-0.770463	NA	NA	NA	NA	NA	NA	NA	NA	NA	NA	NA	NA
ASXL2	-0.25217	-0.364524	-0.349993	-1.2619	-1.2619	-1.26191	-0.471084	-0.646883	-0.643918	NA	NA	NA	NA	NA	NA	NA	NA	NA	NA	NA	NA
ATAD1	0.349726	0.342004	0.338	0.318896	0.320165	0.321057	0.332325	0.330055	0.331459	0.119345	0.129076	0.128964	0.291583	0.128652	0.0972298	0.137236	0.181148	0.137763	0.164695	0.160526	0.0786819
ATAD2	0.199208	0.189747	0.188867	0.222949	0.225221	0.221097	0.208896	0.189361	0.190319	0.160993	0.142628	0.154639	-1.26194	-1.26193	-1.26189	0.16141	0.106441	0.162799	0.167556	0.161892	0.200831
ATAD2B	0.228034	0.215142	0.214321	0.0475	0.0481887	0.0464475	0.113094	0.115357	0.110398	NA	NA	NA	NA	NA	NA	NA	NA	NA	NA	NA	NA
ATAD3A	0.415325	0.410257	0.40893	0.36705	0.355242	0.358316	0.46181	0.450217	0.444462	0.253555	0.280184	0.303939	0.333807	0.321272	0.287535	0.359431	0.336937	0.35201	0.412035	0.388899	0.365532
ATAD5	-1.26186	-1.26185	-1.26186	0.110398	0.100629	0.104603	-0.250099	-0.356699	-0.249234	NA	NA	NA	NA	NA	NA	NA	NA	NA	NA	NA	NA
ATE1	0.311244	0.309127	0.302157	0.21046	0.211645	0.20804	0.272393	0.272039	0.272777	0.146878	0.158984	0.167436	0.155265	0.150503	0.185057	0.105283	0.182002	0.21236	0.0883124	-1.26189	0.113569
ATF1	-0.65375	-0.64768	-0.647508	0.109717	0.107913	0.102685	0.268305	0.271824	0.274411	NA	NA	NA	NA	NA	NA	NA	NA	NA	NA	NA	NA
ATF2	-0.453054	-0.0538871	-0.0546879	0.0828707	0.0930194	0.0838305	0.096516	0.103759	0.0961644	-0.255586	-0.0295895	-0.0109432	-0.561348	-0.254835	-1.26189	-0.446355	-1.26193	-0.631283	0.127264	-1.26189	0.228335
ATF6B	-1.16387	-1.06923	-1.26183	-1.26195	-1.26195	-1.26195	0.00669159	0.000616415	-0.0150568	NA	NA	NA	NA	NA	NA	NA	NA	NA	NA	NA	NA
ATF7	0.00241868	0.0436623	0.048582	-0.166983	-0.0649966	-0.148513	-0.021058	-0.010766	-0.0175982	NA	NA	NA	NA	NA	NA	NA	NA	NA	NA	NA	NA
ATF7IP	0.148643	0.139783	0.143671	0.0148872	0.0220431	0.0118007	0.132128	0.127219	0.120215	NA	NA	NA	NA	NA	NA	NA	NA	NA	NA	NA	NA
ATG101	0.00129019	0.0166436	0.0189905	0.150388	0.155059	0.14907	0.13884	0.141739	0.137427	NA	NA	NA	NA	NA	NA	NA	NA	NA	NA	NA	NA
ATG13	0.0426986	0.0334996	0.0419038	-1.26185	-1.26183	-1.26186	0.0292982	0.0084445	0.0478817	NA	NA	NA	NA	NA	NA	NA	NA	NA	NA	NA	NA
ATG16L1	0.169758	0.164508	0.170033	0.131359	0.129501	0.131359	0.135146	0.130715	0.136762	-1.26195	-0.150209	-1.26195	-1.26194	-1.26193	-1.26189	-0.0023189	0.0868492	-1.26194	-1.26192	-1.26189	-1.26191
ATG16L2	0.0248077	0.0205734	0.0211864	-0.453054	-0.349993	-0.451148	0.0117388	0.0157395	0.0253354	NA	NA	NA	NA	NA	NA	NA	NA	NA	NA	NA	NA
ATG2A	0.0457613	0.0399057	0.0451751	-0.042501	-0.0454533	-0.0472741	-0.00217976	-0.0025849	0.00071119	0.0071726	-1.26195	0.0438107	-0.0314403	-0.0103163	0.0266029	-1.26195	-0.0469766	-1.26194	-1.26192	-1.26189	-1.26191
ATG2B	-0.0610358	-0.0666306	-0.0683321	-0.0170714	-0.0239723	-0.0166829	0.090173	0.101097	0.112228	NA	NA	NA	NA	NA	NA	NA	NA	NA	NA	NA	NA
ATG3	0.0996068	0.132892	0.145931	0.346879	0.338987	0.346187	0.311514	0.308299	0.330501	0.220118	0.186404	0.20126	0.128276	0.182686	0.18601	0.232365	0.215042	0.215388	0.204644	0.26519	0.243537
ATG4A	-0.243738	-0.253947	-0.248458	-1.26187	-1.26189	-1.26188	-0.655802	-0.669857	-0.657171	NA	NA	NA	NA	NA	NA	NA	NA	NA	NA	NA	NA
ATG4B	0.245215	0.237962	0.23238	0.24449	0.239827	0.247739	0.262953	0.274329	0.272468	-0.652155	-0.0416808	-1.26195	-0.0478957	-0.0149849	-0.0164787	0.00252057	0.0184173	-0.0232317	-0.149782	0.0463895	0.0543203
ATG5	0.288979	0.300571	0.313522	0.281462	0.273764	0.278573	0.302157	0.310937	0.317154	0.233379	0.244895	0.267445	0.126431	0.122833	0.127264	0.075647	-0.354994	-0.642823	0.174835	0.0446241	0.203397
ATG7	0.200149	0.189987	0.192738	0.157172	0.14907	0.15266	0.153229	0.141488	0.158045	-0.04201	0.00733688	0.0247069	0.000558837	-0.0254189	-1.26189	0.0690182	0.202813	0.125683	0.17975	0.0678575	0.0904089
ATHL1	0.156498	0.157085	0.145073	0.0566801	0.0494252	0.0543729	0.0312222	0.0353317	0.0426137	NA	NA	NA	NA	NA	NA	NA	NA	NA	NA	NA	NA
ATIC	0.861472	0.830573	0.829181	0.77973	0.765228	0.768169	0.801292	0.780898	0.813603	0.639496	0.645897	0.648521	0.688802	0.610893	0.610893	0.65864	0.767084	0.71774	0.712981	0.725693	0.675042
ATL2	0.0886548	0.0867223	0.0887371	0.271287	0.286763	0.27738	0.176666	0.168906	0.157085	NA	NA	NA	NA	NA	NA	NA	NA	NA	NA	NA	NA
ATL3	0.388065	0.380687	0.373661	0.345196	0.349625	0.341467	0.375792	0.36907	0.373765	0.319943	0.323383	0.314464	0.349463	0.32011	0.310571	0.286404	0.292891	0.257137	0.310372	0.249055	0.344799
ATM	0.164765	0.163063	0.163306	0.0663646	0.0612275	0.0596315	0.082624	0.0821678	0.0866113	0.436413	0.442635	0.443242	0.438775	0.421671	0.405784	0.36387	0.32011	0.291006	0.308464	0.328435	0.311661
ATN1	-1.26197	-1.26197	-1.26197	-1.26183	-1.26194	-1.26186	-0.25464	-0.352685	-0.348612	NA	NA	NA	NA	NA	NA	NA	NA	NA	NA	NA	NA
ATOX1	-1.26197	-1.26197	-1.26197	0.0609286	0.0611074	0.0784723	0.00470387	0.0543244	0.00591191	0.243064	0.241334	0.257766	0.0970493	0.176244	0.16576	0.203473	0.215388	0.299552	0.300147	0.120631	0.286537
ATP10A	-1.26189	-1.26189	-1.26189	-1.26187	-1.26189	-1.26187	-1.26198	-1.26198	-1.26198	NA	NA	NA	NA	NA	NA	NA	NA	NA	NA	NA	NA
ATP11A	-1.26183	-1.26183	-1.26183	-1.26188	-1.26189	-1.26189	-1.2619	-1.26191	-1.26191	NA	NA	NA	NA	NA	NA	NA	NA	NA	NA	NA	NA
ATP11B	0.210751	0.206274	0.198945	0.192423	0.196598	0.190782	0.0570741	0.063399	0.0771812	-0.0206026	-0.0117718	0.0547299	0.0896938	0.0958721	0.0512916	-1.26195	-1.26193	0.109359	-1.26192	-0.00324154	-1.26191
ATP11C	0.195545	0.196823	0.195952	0.137141	0.148069	0.140448	0.148643	0.142506	0.15329	NA	NA	NA	NA	NA	NA	NA	NA	NA	NA	NA	NA
ATP13A1	0.284051	0.280688	0.279779	0.306562	0.309941	0.310937	0.198163	0.193096	0.200744	0.106145	0.0890591	0.0859604	0.141011	0.177848	0.184333	0.298132	0.286251	0.27376	0.194626	0.236375	0.172129
ATP13A3	-0.252666	-0.26216	-0.251911	-0.558944	-0.651891	-0.470399	-0.045723	-0.148513	-0.246278	NA	NA	NA	NA	NA	NA	NA	NA	NA	NA	NA	NA
ATP1A1	0.640418	0.625507	0.630708	0.53826	0.525295	0.529192	0.66402	0.660172	0.650326	0.467842	0.444433	0.453273	0.534811	0.479541	0.468486	0.522454	0.497601	0.524738	0.56475	0.568914	0.550006
ATP1A4	-1.26188	-1.26188	-1.26188	-0.462279	-0.637318	-0.453428	0.0864996	0.105051	0.0902354	NA	NA	NA	NA	NA	NA	NA	NA	NA	NA	NA	NA
ATP1B1	0.304808	0.302387	0.296671	0.301936	0.301231	0.273949	0.134469	0.137954	0.151203	NA	NA	NA	NA	NA	NA	NA	NA	NA	NA	NA	NA
ATP1B3	0.438891	0.437656	0.427445	0.426211	0.409109	0.414504	0.451168	0.438256	0.437656	0.317987	0.330185	0.322876	0.325258	0.256975	0.281805	0.361303	0.33986	0.345462	0.317312	0.329781	0.352581
ATP23	-0.0192451	-0.0130557	-0.0256521	-1.26196	-1.26196	-1.26196	-1.26198	-1.26198	-1.26198	NA	NA	NA	NA	NA	NA	NA	NA	NA	NA	NA	NA
ATP2A1	-1.26197	-1.26197	-1.26197	-1.262	-1.262	-1.262	-1.26188	-1.26189	-1.26189	NA	NA	NA	NA	NA	NA	NA	NA	NA	NA	NA	NA
ATP2A2	0.458414	0.446495	0.441656	0.504608	0.504853	0.505124	0.486087	0.470746	0.458218	0.268102	0.256838	0.282368	0.287181	0.233474	0.258809	0.439002	0.473188	0.468175	0.429024	0.424038	0.425431
ATP2A3	0.480904	0.470056	0.479473	0.31218	0.31032	0.30939	0.328856	0.327366	0.312753	0.459035	0.472151	0.469131	0.520039	0.458178	0.441003	0.442635	0.441571	0.467527	0.412311	0.408213	0.427104
ATP2B1	0.173784	0.174044	0.183046	0.337129	0.33523	0.334692	0.190666	0.174404	0.183415	0.0476565	-0.445696	-1.26195	0.110044	-0.0268194	-1.26189	-1.26195	-1.26193	-1.26194	-1.26192	-1.26189	-1.26191
ATP2B3	-1.26197	-1.26197	-1.26197	-1.06837	-1.26195	-1.26186	-1.26198	-1.26198	-1.26198	NA	NA	NA	NA	NA	NA	NA	NA	NA	NA	NA	NA
ATP2B4	-1.26188	-1.26187	-1.26187	0.288824	0.300571	0.294411	0.0866663	0.0891376	0.0885691	0.327106	0.293671	0.319775	0.339474	0.329211	0.337822	0.246699	0.21724	0.285534	0.182086	0.139278	0.200026
ATP2C1	0.11667	0.109899	0.108875	0.0646023	0.0676721	0.0695392	0.0923211	0.0874493	0.0881498	NA	NA	NA	NA	NA	NA	NA	NA	NA	NA	NA	NA
ATP5F1A	1.87203	1.81342	1.87203	1.26676	1.32904	1.261	1.62486	1.61236	1.61236	1.20997	1.186	1.186	1.27565	1.17278	1.17278	1.16066	1.02048	1.10373	1.1533	1.37838	1.04051
ATP5F1B	1.92779	1.87203	1.83146	1.57972	1.65741	1.51983	1.15807	1.1672	1.15332	1.57146	1.52513	1.51002	1.47566	1.20268	1.29384	1.37838	1.53727	1.42894	1.86145	1.86145	1.7178
ATP5F1C	0.823371	0.801292	0.750942	0.463842	0.45871	0.46608	0.471542	0.468224	0.484984	0.461729	0.475853	0.458178	0.466204	0.486872	0.500489	0.46519	0.440432	0.453273	0.457087	0.465895	0.432261
ATP5F1D	0.299587	0.314681	0.335974	0.374979	0.390428	0.37908	0.412649	0.452402	0.406647	0.194818	0.127892	0.103649	0.201453	0.324067	0.214669	0.197067	0.18706	0.169759	0.252057	0.275898	0.276923
ATP5IF1	0.3341	0.347885	0.357333	0.49409	0.463842	0.499074	0.122898	0.121692	0.134326	0.21572	0.247903	0.28789	0.359967	0.320801	0.276769	0.267972	0.245169	0.188321	0.161043	-1.26189	0.132437
ATP5MC3	0.605818	0.569995	0.564589	0.384283	0.372516	0.377981	0.470259	0.446495	0.457645	NA	NA	NA	NA	NA	NA	NA	NA	NA	NA	NA	NA
ATP5MD	0.717168	0.676761	0.698352	0.375252	0.389873	0.383199	0.122353	0.147457	0.140744	0.24016	0.258162	0.235994	0.241334	0.237551	0.251979	0.150997	0.148521	0.137111	0.176646	0.183232	0.162304
ATP5ME	0.889092	0.967166	0.824608	0.450813	0.451574	0.458414	0.3326	0.390255	0.339469	0.289425	0.246109	0.256092	0.197492	0.288458	0.315887	0.216083	0.0654534	0.163334	0.363506	0.395599	0.340446
ATP5MF	0.489694	0.479719	0.48298	0.419307	0.396706	0.40517	0.337419	0.349625	0.36501	0.27263	0.274633	0.271579	0.249259	0.242736	0.248964	0.295138	0.289425	0.283289	0.292756	0.324685	0.27844
ATP5MG	0.398973	0.407534	0.36379	0.338586	0.336666	0.352019	-1.26198	-1.26198	-1.26198	0.380115	0.376056	0.358729	0.362348	0.405784	0.387116	0.298484	0.31772	0.306246	0.315887	0.364752	0.339672
ATP5PB	0.841092	0.857431	0.841092	0.529192	0.546013	0.531809	0.704009	0.688268	0.67314	0.488493	0.493246	0.48768	0.448091	0.527561	0.49116	0.400588	0.37095	0.357803	0.384312	0.398744	0.381505
ATP5PF	0.0238449	0.0655173	0.051187	0.232228	0.243064	0.24872	-1.26198	-1.26198	-1.26198	0.308311	0.393557	0.396635	0.282933	0.317444	0.316289	-1.26195	0.0988073	0.0652682	0.235375	0.255423	0.230037
ATP5PO	0.800178	0.782145	0.793643	0.543968	0.583673	0.553738	0.498112	0.530909	0.512209	0.464898	0.478832	0.492182	0.452699	0.460496	0.474071	0.346166	0.364391	0.373561	0.500489	0.514761	0.483473
ATP5S	-0.0123873	-0.0198523	-0.0204558	-1.26197	-1.26196	-1.26196	-1.26198	-1.26198	-1.26198	NA	NA	NA	NA	NA	NA	NA	NA	NA	NA	NA	NA
ATP5SL	-1.26197	-1.26197	-1.26197	-0.149968	-0.0617949	-0.0693066	-1.26198	-1.26198	-1.26198	NA	NA	NA	NA	NA	NA	NA	NA	NA	NA	NA	NA
ATP6AP1	0.123219	0.129875	0.132636	0.0493264	0.0590231	0.053147	0.248354	0.240817	0.241966	-1.26195	-1.16519	-0.643839	-1.26194	-0.0343344	-1.26189	-0.0247211	-1.26193	-0.0264781	-0.0232317	0.0200467	-1.26191
ATP6AP2	0.134262	0.128712	0.12298	0.190496	0.189411	0.18983	0.12134	0.111354	0.113646	NA	NA	NA	NA	NA	NA	NA	NA	NA	NA	NA	NA
ATP6V0A1	-1.26197	-1.26197	-1.26197	-0.0628976	-0.243557	-0.150099	-0.0487982	-0.64411	-0.066212	NA	NA	NA	NA	NA	NA	NA	NA	NA	NA	NA	NA
ATP6V0A2	0.228685	0.22538	0.235376	0.172774	0.186875	0.178258	0.306773	0.298404	0.281989	-1.26195	-1.26195	-1.26195	-1.26194	-1.26193	-1.26189	-1.26195	-0.445454	-0.252671	0.0201953	-1.26189	-0.049176
ATP6V0C	0.202703	0.190666	0.209027	0.280565	0.269497	0.275132	0.0888054	0.0832459	0.0911385	0.149056	0.160638	0.0848167	0.0321772	0.0133565	0.0348959	0.0709049	-1.26193	-0.651619	0.0433913	0.118909	0.0361732
ATP6V0D1	0.109263	0.0883435	0.0759586	0.264195	0.268219	0.267168	0.243449	0.223163	0.23645	-1.26195	-0.376958	-1.26195	-1.26194	-1.26193	0.0786819	0.0186549	-0.0372119	-1.26194	0.1017	0.169759	0.185613
ATP6V1A	0.450404	0.4375	0.440553	0.455516	0.461207	0.460212	0.43688	0.436147	0.453853	0.334712	0.31913	0.336937	0.289064	0.351041	0.339474	0.378715	0.341374	0.315573	0.327648	0.355246	0.280544
ATP6V1B2	0.426735	0.421104	0.421623	0.428735	0.42712	0.429321	0.376176	0.373551	0.381525	0.310725	0.290251	0.303814	0.328165	0.333473	0.319943	0.366859	0.357644	0.319943	0.356099	0.309651	0.354026
ATP6V1C1	0.284986	0.274864	0.276848	0.329237	0.332017	0.34398	0.254194	0.251174	0.256378	0.0906629	0.107412	0.166187	0.115181	0.139655	0.217598	0.134692	0.123842	0.110796	0.354501	0.317987	0.249259
ATP6V1D	0.299925	0.291368	0.294136	0.280446	0.298029	0.291857	0.286763	0.294639	0.314099	0.0822129	0.103457	0.0358178	0.0931855	0.0797768	0.0222444	0.167217	0.181379	-1.26194	-1.26192	0.119043	-0.0373907
ATP6V1E1	0.528876	0.52638	0.530208	0.481679	0.503979	0.492786	0.441301	0.460212	0.472233	0.282202	0.292756	0.278339	0.206869	0.187417	0.216658	0.21888	0.250518	0.2307	0.307719	0.312315	0.318663
ATP6V1F	-0.00956132	0.00460488	0.0246738	0.36798	0.357573	0.361082	0.292079	0.327051	0.306855	0.0172771	-0.861634	-1.26195	-1.26194	-1.26193	-1.26189	-0.0382026	-1.26193	-1.26194	0.101188	0.188008	0.0209414
ATP6V1G1	0.250305	0.264857	0.277787	0.35336	0.361476	0.365224	0.206672	0.262717	0.238658	0.157238	0.126316	0.121533	0.121458	0.147966	0.143919	0.0115605	0.0481828	0.0235846	0.131487	0.164439	0.136734
ATP6V1H	0.28747	0.284921	0.274495	0.204955	0.213465	0.205298	0.257116	0.265455	0.283589	0.18706	0.162718	0.135682	0.108685	0.112111	0.102279	0.0789417	0.186687	0.0497847	0.00252057	-0.011356	0.0496007
ATP7A	-1.26197	-1.26197	-1.26197	-1.262	-1.262	-1.262	-0.365177	-0.364524	-0.251911	NA	NA	NA	NA	NA	NA	NA	NA	NA	NA	NA	NA
ATP8A1	0.06744	0.0707172	0.0705113	-0.449239	-0.369183	-0.458546	-0.650961	-0.651238	-0.652912	NA	NA	NA	NA	NA	NA	NA	NA	NA	NA	NA	NA
ATP8B2	-0.1523	-0.151631	-0.159645	-1.26192	-1.26191	-1.26192	-0.48357	-0.560723	-0.56472	NA	NA	NA	NA	NA	NA	NA	NA	NA	NA	NA	NA
ATP8B4	-1.26183	-1.26183	-1.26186	-1.26199	-1.26199	-1.26199	-1.26198	-1.26198	-1.26198	NA	NA	NA	NA	NA	NA	NA	NA	NA	NA	NA	NA
ATP9A	-1.26182	-1.26183	-1.06923	-1.26185	-1.06548	-1.26184	-1.26198	-1.26198	-1.26198	NA	NA	NA	NA	NA	NA	NA	NA	NA	NA	NA	NA
ATP9B	-0.458546	-0.457337	-0.472938	0.0334996	0.048582	0.0359716	0.0705113	0.070998	0.0730903	NA	NA	NA	NA	NA	NA	NA	NA	NA	NA	NA	NA
ATPAF1	0.191492	0.196207	0.203854	0.107254	0.11002	0.10498	0.0780009	0.0810221	0.0892084	NA	NA	NA	NA	NA	NA	NA	NA	NA	NA	NA	NA
ATPAF2	0.219092	0.20579	0.208967	0.156745	0.162556	0.156351	0.212643	0.194481	0.181286	NA	NA	NA	NA	NA	NA	NA	NA	NA	NA	NA	NA
ATPSCKMT	-0.015738	-0.00846905	-0.0185495	0.11028	0.110786	0.108658	0.124413	0.120333	0.117094	NA	NA	NA	NA	NA	NA	NA	NA	NA	NA	NA	NA
ATR	0.0349103	0.0317464	0.0313133	0.0958073	0.101445	0.0950936	0.139336	0.147146	0.155961	NA	NA	NA	NA	NA	NA	NA	NA	NA	NA	NA	NA
ATRAID	-0.022076	-0.0194946	-0.00169754	-0.0268738	-0.0555819	-0.0246247	-1.26198	-1.26198	-1.26198	NA	NA	NA	NA	NA	NA	NA	NA	NA	NA	NA	NA
ATRIP	-1.26183	-1.26184	-1.26183	-0.643116	-0.363942	-0.463039	-1.26189	-1.26189	-1.26189	NA	NA	NA	NA	NA	NA	NA	NA	NA	NA	NA	NA
ATRX	0.269061	0.261497	0.256227	0.258222	0.260153	0.254117	0.238823	0.226003	0.22942	0.155097	0.188549	0.195046	0.252989	0.19178	0.146878	0.121011	0.137632	0.0934604	0.047526	0.115631	0.152368
ATXN1	-0.249234	-0.210148	-0.244978	-0.244538	-0.0670168	-0.0764634	-0.0198523	-0.0350763	-0.0451456	NA	NA	NA	NA	NA	NA	NA	NA	NA	NA	NA	NA
ATXN10	0.314949	0.297546	0.296049	0.331721	0.342725	0.332106	0.394044	0.397683	0.400497	0.1604	0.160869	0.160526	0.193172	0.153038	0.139777	0.178045	0.230889	0.27957	0.283289	0.185613	0.314316
ATXN1L	-1.26186	-1.26183	-0.96588	0.00139486	-0.00137189	0.00173265	0.0307531	0.0426986	0.044782	NA	NA	NA	NA	NA	NA	NA	NA	NA	NA	NA	NA
ATXN2	0.0434761	0.0353317	0.0350809	0.0872213	0.0845047	0.0867223	0.187204	0.193386	0.196417	-1.26195	-0.0487805	-1.26195	0.0711006	-0.0274152	-1.26189	-0.245769	-0.00116556	-0.245769	-0.243321	-1.26189	-1.26191
ATXN2L	0.336666	0.330055	0.33699	0.438748	0.461003	0.454552	0.49305	0.492095	0.49409	0.254678	0.252217	0.23183	0.280861	0.267584	0.300273	0.317312	0.303485	0.303485	0.328764	0.330185	0.317444
ATXN3	0.0302461	0.0565436	0.0585483	0.156413	0.151674	0.151017	0.23238	0.240964	0.229807	0.0439607	0.0874082	0.0779634	0.0822129	0.109449	0.085344	-1.26195	-0.0393748	-0.251514	0.0562329	-1.26189	-1.26191
ATXN7	-0.658462	-0.650961	-0.649754	-1.26197	-1.26197	-1.26197	-1.26184	-1.16465	-1.26184	NA	NA	NA	NA	NA	NA	NA	NA	NA	NA	NA	NA
ATXN7L1	-0.85938	-0.767374	-0.674781	-1.26198	-1.26198	-1.26198	-1.26185	-1.26186	-1.26185	NA	NA	NA	NA	NA	NA	NA	NA	NA	NA	NA	NA
ATXN7L3	-0.24788	-0.353954	-0.25873	-0.970219	-1.06932	-0.962737	0.0683102	0.0671043	0.0522719	NA	NA	NA	NA	NA	NA	NA	NA	NA	NA	NA	NA
ATXN7L3B	0.0264333	0.0319756	0.024448	0.220102	0.203147	0.221798	-1.26198	-1.26198	-1.26198	NA	NA	NA	NA	NA	NA	NA	NA	NA	NA	NA	NA
AUH	0.381237	0.389699	0.36856	0.278807	0.261826	0.262054	0.303098	0.305078	0.312853	-0.162134	-0.649461	-1.26195	-1.26194	-1.26193	-1.26189	-1.26195	-1.26193	-1.26194	-1.26192	-1.26189	-1.26191
AUNIP	-1.26197	-1.26197	-1.26197	-1.26199	-1.262	-1.262	-1.26198	-1.26198	-1.26198	NA	NA	NA	NA	NA	NA	NA	NA	NA	NA	NA	NA
AUP1	0.275229	0.264787	0.26285	0.279579	0.287857	0.282903	0.242741	0.236868	0.242307	-0.959129	-0.0422744	0.018295	-1.26194	-1.26193	-1.26189	-1.26195	-1.26193	-0.353426	-1.26192	-1.26189	-1.26191
AURKA	0.024336	0.0266587	0.0268541	0.251385	0.258379	0.253166	-0.0291103	-0.347914	-0.247018	-1.26195	-1.26195	-1.26195	-1.26194	-1.26193	-1.26189	-1.26195	-1.26193	0.059176	-0.0679018	-1.26189	-0.0618079
AURKAIP1	-1.26197	-1.26197	-1.26197	-0.650431	-0.64995	-0.648779	-1.26198	-1.26198	-1.26198	NA	NA	NA	NA	NA	NA	NA	NA	NA	NA	NA	NA
AURKB	-1.26197	-1.26197	-1.26197	0.31519	0.2962	0.312506	0.0951688	0.0708824	0.0751934	-1.26195	-1.26195	-1.26195	-1.26194	-1.26193	-1.26189	0.0407519	0.0826237	0.0122458	0.129594	0.0975344	0.10177
AVEN	0.0465497	0.100566	0.0954886	0.177884	0.176622	0.174044	0.244429	0.225594	0.229518	NA	NA	NA	NA	NA	NA	NA	NA	NA	NA	NA	NA
AVL9	0.0883435	0.084413	0.083936	0.0652704	0.066994	0.0698177	0.0797209	0.0736854	0.0775843	NA	NA	NA	NA	NA	NA	NA	NA	NA	NA	NA	NA
AXIN1	-0.256747	-0.35375	-0.253514	-1.2619	-1.26191	-1.26191	-1.26192	-1.26191	-1.26191	NA	NA	NA	NA	NA	NA	NA	NA	NA	NA	NA	NA
AZI2	-1.26197	-1.26197	-1.26197	0.0621476	0.056326	0.0683102	-1.26185	-1.26183	-1.26183	NA	NA	NA	NA	NA	NA	NA	NA	NA	NA	NA	NA
B2M	0.239448	0.293735	0.277454	0.472233	0.488664	0.48639	-1.26198	-1.26198	-1.26198	0.397079	0.391936	0.350466	0.393326	0.394824	0.412311	1.09801	0.804176	0.888788	0.879696	0.830286	1.13117
B3GALNT2	-1.26185	-1.26184	-1.26184	-1.26199	-1.26199	-1.26199	-0.25164	-0.25873	-0.265509	NA	NA	NA	NA	NA	NA	NA	NA	NA	NA	NA	NA
B3GALT4	0.0783978	0.0779479	0.0724307	-0.365177	-0.648894	-0.455271	-1.2619	-1.26191	-1.26192	NA	NA	NA	NA	NA	NA	NA	NA	NA	NA	NA	NA
B3GALT6	0.152962	0.158397	0.151674	0.153895	0.150878	0.149291	0.0969538	0.0969538	0.106904	NA	NA	NA	NA	NA	NA	NA	NA	NA	NA	NA	NA
B3GALTL	0.0641048	0.0607333	0.0477517	-0.659163	-0.655665	-0.646033	-0.00379575	-0.015608	-0.0132828	NA	NA	NA	NA	NA	NA	NA	NA	NA	NA	NA	NA
B3GAT3	-1.26197	-1.26197	-1.26197	-0.460657	-0.242188	-0.348926	-1.2619	-1.2619	-1.26191	-0.647604	0.0316194	0.0746419	0.0663334	0.0597343	-1.26189	0.095687	0.0552535	0.0803656	-0.0302252	-1.26189	-1.26191
B3GNT2	0.00195996	0.000954436	0.00288173	0.0330029	0.0216609	0.0287887	0.140079	0.123144	0.114251	NA	NA	NA	NA	NA	NA	NA	NA	NA	NA	NA	NA
B3GNTL1	-0.643205	-0.460657	-0.45801	-0.354952	-0.26469	-0.263079	-1.06923	-1.06488	-0.861834	NA	NA	NA	NA	NA	NA	NA	NA	NA	NA	NA	NA
B4GALNT1	0.361326	0.360509	0.358649	0.348586	0.348229	0.350802	0.328433	0.307265	0.301494	NA	NA	NA	NA	NA	NA	NA	NA	NA	NA	NA	NA
B4GALT1	0.0761624	0.06744	0.0572566	0.111354	0.104424	0.107411	0.101299	0.105192	0.110325	NA	NA	NA	NA	NA	NA	NA	NA	NA	NA	NA	NA
B4GALT4	-1.26197	-1.26197	-1.26197	-0.0592538	-0.162906	-0.246278	-1.26198	-1.26198	-1.26198	NA	NA	NA	NA	NA	NA	NA	NA	NA	NA	NA	NA
B4GALT5	-0.00640239	-0.0103752	-0.0553399	0.0922287	0.108104	0.0961644	-1.26187	-1.26186	-0.767978	NA	NA	NA	NA	NA	NA	NA	NA	NA	NA	NA	NA
B4GALT7	-0.040355	-0.0215567	-0.0160803	-0.5674	-0.465984	-0.364524	-1.26188	-1.2619	-1.26189	NA	NA	NA	NA	NA	NA	NA	NA	NA	NA	NA	NA
B4GAT1	-1.26197	-1.26197	-1.26197	-1.26189	-1.2619	-1.26186	-0.648528	-0.556217	-0.660201	NA	NA	NA	NA	NA	NA	NA	NA	NA	NA	NA	NA
B9D2	-1.26197	-1.26197	-1.26197	-1.26195	-1.26192	-1.26195	0.0411416	0.0199655	0.0135491	NA	NA	NA	NA	NA	NA	NA	NA	NA	NA	NA	NA
BABAM1	0.157219	0.181374	0.196676	0.263349	0.270083	0.262953	0.283589	0.292527	0.29008	0.183709	0.193337	0.195197	0.109228	0.104481	0.153627	0.102971	0.149167	0.101071	0.0687953	0.0936578	-0.0482165
BACH1	0.0553459	0.0299384	0.0386879	-0.0598979	-0.0628976	-0.152007	-0.00356065	0.0108692	0.0110173	NA	NA	NA	NA	NA	NA	NA	NA	NA	NA	NA	NA
BACH2	0.161595	0.159258	0.162499	0.0361569	0.0400771	0.0334145	0.220808	0.217348	0.213909	-0.0732319	-0.0663663	-0.65016	0.0344722	0.103135	0.0486968	-1.26195	-1.26193	-1.26194	0.180932	0.305764	0.244752
BAG1	0.198839	0.215991	0.226003	0.217652	0.214775	0.21675	0.31519	0.31162	0.305398	0.0235846	0.117421	0.101188	0.131389	0.169111	0.0635719	0.16966	0.193819	0.220378	-1.26192	-0.163342	0.0607275
BAG2	-0.959064	-0.678737	-0.86461	0.215061	0.20298	0.209199	0.128833	0.153118	0.145222	0.121533	0.130019	0.129462	0.158317	0.155097	0.113925	0.250149	0.284097	0.256298	0.274507	0.170067	0.241334
BAG3	-1.26197	-1.26197	-1.26197	-1.26197	-1.26197	-1.26197	-0.655531	-0.446483	-0.446712	0.177255	0.167035	0.151775	-0.048564	0.048006	0.0443986	-0.0013201	-1.26193	0.00936275	0.150253	0.131299	0.118378
BAG4	-1.26197	-1.26197	-1.26197	-1.26195	-1.26196	-1.26195	-1.26198	-1.26198	-1.26198	NA	NA	NA	NA	NA	NA	NA	NA	NA	NA	NA	NA
BAG5	0.391382	0.384283	0.384169	0.202224	0.191991	0.195545	0.256227	0.256028	0.254117	0.173261	0.17847	0.17672	0.0638513	0.012871	-0.022936	0.228335	0.24016	0.180215	0.157952	0.189077	0.199102
BAG6	0.145409	0.160621	0.181778	0.326654	0.3446	0.333315	0.350987	0.353135	0.35346	0.283809	0.252526	0.268371	0.186524	0.210462	0.231735	0.267237	0.24463	0.276923	0.406243	0.414777	0.421134
BAHD1	0.0648557	0.0628523	0.0662411	-0.0132828	-0.015294	-0.0133892	0.043914	0.050375	0.0346493	NA	NA	NA	NA	NA	NA	NA	NA	NA	NA	NA	NA
BAIAP2	0.0726053	0.0623284	0.061563	0.176076	0.179508	0.181633	-0.0366013	-0.0363333	-0.0184682	NA	NA	NA	NA	NA	NA	NA	NA	NA	NA	NA	NA
BAK1	0.464338	0.45536	0.450813	0.442971	0.465003	0.446981	0.3446	0.354474	0.382841	0.0778837	0.127491	0.0920926	0.070319	0.141071	0.137763	-1.26195	0.109759	0.148325	0.0669355	-0.0343344	-0.0666885
BANF1	0.0517817	0.0351654	0.0383239	0.313326	0.295775	0.321373	-1.26198	-1.26198	-1.26198	0.519377	0.523583	0.512711	0.389566	0.447837	0.453273	0.054053	0.325933	0.29382	0.622333	0.485409	0.510595
BANK1	-0.470399	-0.662067	-0.653966	-1.262	-1.262	-1.262	0.0619406	-0.00648977	0.0379654	NA	NA	NA	NA	NA	NA	NA	NA	NA	NA	NA	NA
BANP	0.0920273	0.112976	0.125233	-0.450729	-0.477594	-0.450903	0.0425094	0.0343583	0.051187	NA	NA	NA	NA	NA	NA	NA	NA	NA	NA	NA	NA
BAP1	0.151959	0.142562	0.133126	0.0254015	0.0188942	0.00812992	-0.0449926	-0.0356825	-0.0405904	NA	NA	NA	NA	NA	NA	NA	NA	NA	NA	NA	NA
BARD1	-1.2619	-1.2619	-1.26189	0.075379	0.0695392	0.0748687	-0.677558	-1.26183	-1.06837	NA	NA	NA	NA	NA	NA	NA	NA	NA	NA	NA	NA
BASP1	-1.26197	-1.26197	-1.26197	0.250941	0.217539	0.244593	-1.26198	-1.26198	-1.26198	-0.654258	0.0135602	-1.26195	-0.0317199	0.0939496	0.0175505	-1.26195	-0.249665	-1.26194	0.221457	0.23361	0.218766
BATF	-1.26197	-1.26197	-1.26197	0.18747	0.193096	0.187841	0.248426	0.249021	0.25755	-1.26195	-1.26195	-1.26195	-1.26194	-1.26193	-1.26189	-0.0171993	0.0421048	-0.0482165	0.152174	0.166591	0.164805
BAX	0.63474	0.63474	0.643172	0.660932	0.693215	0.654241	0.636215	0.62399	0.638064	0.215388	0.199281	0.178171	0.165953	0.160768	0.0574587	0.11166	0.16342	0.20482	0.261752	0.262896	0.252327
BAZ1A	0.178014	0.1737	0.170968	0.27071	0.276195	0.269418	0.271287	0.26285	0.262544	0.00215514	-1.26195	-0.0327909	0.0421048	-1.26193	-1.26189	0.197866	0.194818	0.192315	0.215288	0.251509	0.275471
BAZ1B	0.460398	0.454169	0.448428	0.421623	0.422171	0.419037	0.433203	0.420468	0.417984	0.336937	0.319665	0.320239	0.332927	0.300038	0.296152	0.347573	0.38617	0.366859	0.407461	0.401404	0.403126
BAZ2A	0.140744	0.131872	0.128712	0.111719	0.115799	0.112778	0.144139	0.148396	0.149145	NA	NA	NA	NA	NA	NA	NA	NA	NA	NA	NA	NA
BAZ2B	-1.07451	-1.26184	-1.16377	-1.26196	-1.26196	-1.26196	-0.657171	-0.664169	-0.659163	NA	NA	NA	NA	NA	NA	NA	NA	NA	NA	NA	NA
BBX	0.0361569	0.0312222	0.0527762	0.0407791	0.0443956	0.047817	0.0115366	0.0286738	0.0356585	NA	NA	NA	NA	NA	NA	NA	NA	NA	NA	NA	NA
BCAP29	0.313811	0.309941	0.303325	0.405613	0.40922	0.4061	0.352908	0.359933	0.346646	-1.26195	0.037392	-0.649461	-1.26194	-1.26193	-1.26189	-1.26195	-0.0193118	-1.26194	-0.0377071	-0.0422744	0.0500289
BCAP31	0.53826	0.527004	0.533722	0.511427	0.481066	0.496494	0.525295	0.523724	0.529192	0.48961	0.509291	0.499043	0.504551	0.557953	0.560968	0.413948	0.411407	0.403737	0.323162	0.354501	0.334898
BCAS2	0.145276	0.164938	0.164464	0.394453	0.380095	0.397841	0.30904	0.36685	0.308963	0.277512	0.290707	0.269036	0.21236	0.184659	0.216555	0.2089	0.243188	0.229325	0.294946	0.27236	0.276769
BCAS3	0.15498	0.151203	0.144938	0.0320376	0.0370076	0.0308872	0.0845047	0.0867976	0.088948	0.122591	0.048006	0.142489	0.109952	-0.350921	-0.0151329	-1.26195	-1.26193	-1.26194	-1.26192	-1.26189	-1.26191
BCAT1	-1.26188	-1.26188	-1.26187	0.18478	0.171983	0.18759	0.351607	0.316093	0.333536	NA	NA	NA	NA	NA	NA	NA	NA	NA	NA	NA	NA
BCAT2	0.506859	0.489179	0.488664	0.402257	0.380807	0.390673	0.378325	0.36798	0.379002	0.32065	0.304076	0.314316	0.274251	0.230155	0.203081	0.295757	0.261365	0.27236	0.135965	0.241334	0.236898
BCCIP	0.211133	0.220431	0.22302	0.220431	0.211133	0.214656	0.389699	0.385405	0.3943	0.240897	0.240758	0.23712	0.151605	0.135493	0.118745	0.32606	0.360847	0.356099	0.421134	0.377271	0.39425
BCDIN3D	0.0114387	0.0407791	-0.0131901	-0.0465057	-0.0227734	-0.0292116	-0.0580941	-0.0486421	-0.0376898	NA	NA	NA	NA	NA	NA	NA	NA	NA	NA	NA	NA
BCKDHA	0.217012	0.218922	0.210004	0.0113336	0.000114694	0.0117388	0.155687	0.152337	0.155181	0.274109	0.254189	0.253295	0.220118	0.264506	0.254189	0.191332	0.107152	0.186279	0.23712	0.187569	-0.259837
BCKDHB	0.148322	0.13123	0.133185	-1.262	-1.262	-1.262	0.011228	0.0254015	0.0262291	0.151696	0.2089	0.230284	0.192149	0.185057	0.217323	0.159568	0.090174	0.122212	0.0819041	-1.26189	-0.246801
BCKDK	0.172555	0.168055	0.177629	0.148952	0.149007	0.148514	0.12689	0.122443	0.126025	NA	NA	NA	NA	NA	NA	NA	NA	NA	NA	NA	NA
BCL10	0.117878	0.124655	0.155628	0.233933	0.227831	0.237789	0.150452	0.180786	0.152299	0.100491	0.0545653	0.0635719	-0.0482165	-1.26193	-1.26189	0.108235	-1.26193	-1.26194	0.139777	0.0683963	0.154218
BCL11B	0.243144	0.259063	0.264933	0.209778	0.215142	0.211436	0.197947	0.196933	0.188782	0.290857	0.315198	0.310856	0.3538	0.285427	0.259609	0.2307	0.203397	0.229637	0.191229	0.147598	0.143108
BCL2	0.226262	0.210925	0.191297	0.242925	0.245215	0.234157	0.180055	0.202565	0.212796	0.331684	0.301641	0.316587	0.296405	0.280184	0.28789	0.340446	0.374225	0.353479	0.206869	0.283111	0.366454
BCL2L1	-0.456853	-0.452335	-0.448855	0.239117	0.260247	0.247006	0.363124	0.344853	0.354387	NA	NA	NA	NA	NA	NA	NA	NA	NA	NA	NA	NA
BCL2L11	0.0646023	0.0738274	0.0846594	0.194412	0.216604	0.211233	0.0751934	0.0984842	0.0962763	NA	NA	NA	NA	NA	NA	NA	NA	NA	NA	NA	NA
BCL2L13	0.333536	0.33586	0.338476	0.234157	0.238126	0.242817	0.30705	0.316444	0.313522	0.242866	0.253555	0.196908	0.20168	0.205211	0.203902	0.214712	0.249723	0.253555	0.232092	0.192618	0.223833
BCL3	-1.26197	-1.26197	-1.26197	0.00425473	0.0152939	0.00399426	0.0933115	0.104302	0.0920273	-1.26195	-1.26195	-1.26195	-1.26194	-1.26193	-1.26189	-1.26195	-1.26193	-1.26194	-0.0525173	-0.0247211	-0.0503238
BCL7A	-0.0344964	-0.0183591	-0.0172159	-0.253233	-0.466429	-0.260987	0.147107	0.157648	0.159067	NA	NA	NA	NA	NA	NA	NA	NA	NA	NA	NA	NA
BCL7B	-0.0381793	-0.0479384	-0.0502184	0.177726	0.20755	0.185026	0.33699	0.339083	0.32411	NA	NA	NA	NA	NA	NA	NA	NA	NA	NA	NA	NA
BCL7C	0.236936	0.276064	0.261497	0.301399	0.305989	0.299101	0.277958	0.290171	0.279423	0.194626	0.157864	0.121344	0.138923	0.138353	0.0686696	-0.0260745	-1.26193	-0.011356	-1.26192	0.0604468	0.0658049
BCL9L	-1.26197	-1.26197	-1.26197	-1.26199	-1.26199	-1.26199	-1.2619	-1.26189	-1.2619	0.136632	0.115761	0.0745479	0.0845497	0.0741462	-1.26189	-1.26195	-1.26193	-1.26194	-1.26192	-1.26189	-0.0571424
BCLAF1	0.461207	0.452053	0.442788	0.447164	0.451349	0.44956	0.505124	0.481967	0.476594	0.42875	0.445333	0.433374	0.460213	0.447097	0.470098	0.387116	0.406146	0.380839	0.326519	0.345785	0.353148
BCLAF3	0.0592692	0.0578377	0.0618451	0.043914	0.0402735	0.0392701	0.00690408	0.000824615	0.00938147	NA	NA	NA	NA	NA	NA	NA	NA	NA	NA	NA	NA
BCOR	0.0148872	0.0050315	0.0103564	-0.475188	-0.460657	-0.645224	0.153118	0.155767	0.145762	NA	NA	NA	NA	NA	NA	NA	NA	NA	NA	NA	NA
BCR	-0.263079	-0.354952	-0.360986	-0.0287037	-0.0386018	-0.030888	-0.447509	-0.263324	-0.252666	0.146738	0.200026	0.165074	0.142085	0.214574	0.124212	0.0219087	0.070319	0.0490046	0.169006	0.00449577	-0.0155878
BCS1L	0.266576	0.271407	0.270636	-0.0027033	0.0258525	-0.00572329	0.148184	0.148717	0.145409	0.0303887	0.00458917	0.059176	0.00365158	0.0918417	0.149056	0.164505	0.0203342	0.106145	-1.26192	0.103877	0.111885
BDH1	0.579407	0.568166	0.55488	0.377819	0.373551	0.377245	0.44937	0.448983	0.452914	0.27376	0.289689	0.282001	0.300273	0.26681	0.267327	0.24207	0.274937	0.290857	0.211159	0.15196	0.188458
BECN1	0.167868	0.183496	0.187331	0.221026	0.215574	0.221601	0.228429	0.225157	0.226375	-1.26195	-1.26195	-0.25325	-1.26194	-1.26193	-1.26189	-1.26195	-1.26193	-1.26194	0.0268962	-0.0138976	-0.00307522
BEND3	-0.0049375	-0.0359213	-0.0158656	-1.26195	-1.26196	-1.26195	0.109668	0.097283	0.0838305	NA	NA	NA	NA	NA	NA	NA	NA	NA	NA	NA	NA
BET1	0.120285	0.113575	0.104302	0.149438	0.119108	0.160249	-0.658462	-0.66705	-0.964663	NA	NA	NA	NA	NA	NA	NA	NA	NA	NA	NA	NA
BET1L	0.101097	0.0787173	0.0828707	0.275846	0.305715	0.286488	0.214166	0.179413	0.16778	-1.26195	0.021691	0.00553102	-1.26194	-1.26193	-1.26189	-1.26195	-1.26193	-0.242414	-0.353997	-1.26189	-0.256464
BFAR	0.085642	0.0875156	0.0925602	-0.642896	-0.646358	-0.560723	0.0474067	0.048582	0.0501218	NA	NA	NA	NA	NA	NA	NA	NA	NA	NA	NA	NA
BHLHB9	-1.26197	-1.26197	-1.26197	-1.26195	-1.26198	-1.26196	0.0279089	0.035555	0.0217814	NA	NA	NA	NA	NA	NA	NA	NA	NA	NA	NA	NA
BHLHE40	-1.26186	-1.26186	-1.26184	0.0509515	0.0485157	0.0532579	0.119913	0.11519	0.103341	NA	NA	NA	NA	NA	NA	NA	NA	NA	NA	NA	NA
BICD2	0.222744	0.206066	0.220961	0.325177	0.325273	0.325273	0.254507	0.257406	0.265204	-1.26195	0.0628297	-1.26195	-1.26194	-1.26193	-1.26189	-0.336881	-0.0575219	0.0797768	0.0823483	-1.26189	-0.150016
BICRA	0.0895249	0.103759	0.104534	-0.513312	-0.660201	-0.643918	-0.0655664	-0.0546879	-0.042501	NA	NA	NA	NA	NA	NA	NA	NA	NA	NA	NA	NA
BICRAL	-0.649408	-0.247529	-0.0340379	-1.26188	-1.26188	-1.26187	-0.355969	-0.350943	-0.458229	NA	NA	NA	NA	NA	NA	NA	NA	NA	NA	NA	NA
BID	-0.030198	-0.0417596	-0.0236659	0.268055	0.278653	0.2688	0.326356	0.34132	0.330055	0.181148	0.185057	0.152804	0.146984	0.146984	0.147532	-0.648861	0.134027	0.141453	0.180343	0.182534	0.232701
BIN1	0.323173	0.398698	0.434824	0.356622	0.352654	0.351936	0.396859	0.39053	0.384169	0.472994	0.458178	0.434966	0.429024	0.457374	0.457602	0.382149	0.368398	0.359056	0.28789	0.302722	0.319665
BIN2	0.747794	0.748847	0.747794	0.495002	0.508108	0.498112	0.524093	0.516334	0.516592	0.434966	0.462145	0.460807	0.466922	0.468779	0.470642	0.31913	0.32947	0.290143	0.344126	0.361805	0.343048
BIN3	-0.0114602	0.0123111	0.014316	0.0537659	0.0576611	0.0423923	-0.252853	-0.149648	-0.151631	NA	NA	NA	NA	NA	NA	NA	NA	NA	NA	NA	NA
BIRC2	0.187204	0.178014	0.177532	0.124655	0.130823	0.11821	0.111533	0.102898	0.107841	NA	NA	NA	NA	NA	NA	NA	NA	NA	NA	NA	NA
BIRC5	-1.26197	-1.26197	-1.26197	0.137292	0.120397	0.139944	-1.26198	-1.26198	-1.26198	-1.26195	-1.26195	-1.26195	-1.26194	-1.26193	-1.26189	-0.158875	-1.26193	-0.647328	-0.0571424	-0.0709346	-0.0561961
BIRC6	0.163621	0.157721	0.15612	0.228034	0.23675	0.239267	0.173257	0.167448	0.176666	0.00311225	0.0826237	0.0571809	0.0859604	0.0205048	0.093532	0.0203342	0.00379455	0.117576	0.13159	0.0798991	-1.26191
BLM	-0.866966	-0.960123	-0.861324	0.100629	0.0907056	0.0945026	0.0595527	0.0549808	0.0552777	0.277917	0.289575	0.286404	0.238821	0.29657	0.32065	0.189792	0.201818	0.227965	0.224878	0.267114	0.240576
BLMH	0.413754	0.401826	0.400332	0.39458	0.395264	0.398973	0.359723	0.353908	0.364381	0.296039	0.294648	0.291728	0.164942	0.238461	0.253132	0.236719	0.23712	0.249363	0.228743	0.261867	0.242736
BLOC1S1	0.0598074	0.0703433	0.0683817	0.171983	0.156676	0.172717	-0.0178672	0.0334996	0.0255868	-1.26195	0.110113	0.0652682	0.0878673	0.146411	0.164942	-0.652467	-0.0530054	-0.357634	0.0229057	-0.0220122	-0.0268194
BLOC1S3	-1.26197	-1.26197	-1.26197	0.0551418	0.0577405	0.0557607	0.0761624	0.089989	0.0963643	-1.26195	0.124942	0.114025	0.0945207	0.176484	-1.26189	0.103135	0.115416	-0.644934	0.147966	0.131789	0.00174682
BLOC1S4	-0.00137189	-0.00368098	-0.00280074	0.0075514	0.00453753	0.0084445	-0.513312	-0.359685	-0.461548	0.169759	0.151295	0.136734	0.0071726	0.0187774	-1.26189	-1.26195	-0.00727652	0.0177787	0.0376182	0.101873	-1.26191
BLOC1S5	-1.26197	-1.26197	-1.26197	0.0890819	0.0912553	0.0900906	0.0343583	0.0712335	0.049154	0.0189178	0.0512916	0.097325	-0.456637	-0.364591	-1.26189	-0.65175	-1.26193	-0.450208	-0.0564433	-1.26189	-1.26191
BLOC1S6	-1.26197	-1.26197	-1.26197	0.121525	0.127687	0.119169	-1.26198	-1.26198	-1.26198	-0.0666885	-1.26195	-0.0213768	-1.26194	-1.26193	-1.26189	-1.26195	-1.26193	-0.353684	0.15113	-1.26189	0.170067
BLVRA	0.578642	0.576555	0.589177	0.445667	0.438256	0.439183	0.444277	0.440916	0.445667	0.278015	0.296884	0.292891	0.273374	0.276006	0.288345	0.21572	0.25286	0.268551	0.16288	0.155224	0.157094
BLVRB	0.245685	0.251174	0.240964	0.219628	0.216217	0.20212	0.305802	0.283421	0.320858	0.181248	0.176876	0.162304	0.141163	0.137439	0.165074	0.157238	0.156987	0.229206	0.126431	0.0360159	0.137527
BLZF1	-0.858519	-0.961026	-0.857321	-1.26191	-1.26187	-1.2619	0.024336	0.027669	0.00446737	NA	NA	NA	NA	NA	NA	NA	NA	NA	NA	NA	NA
BMI1	0.0984015	0.0810221	0.0791183	0.113957	0.121482	0.123415	-0.156957	-0.243255	-0.246109	NA	NA	NA	NA	NA	NA	NA	NA	NA	NA	NA	NA
BMP2K	-0.0363333	-0.0269885	-0.0119081	0.169695	0.168236	0.175155	0.0246738	0.00669159	0.00139486	NA	NA	NA	NA	NA	NA	NA	NA	NA	NA	NA	NA
BMS1	0.285398	0.280937	0.277612	0.267246	0.281617	0.267016	0.275736	0.270784	0.278734	0.21236	0.180779	0.19178	0.343724	0.428624	0.453707	0.287285	0.276923	0.278667	0.391228	0.330807	0.408803
BNIP1	0.283864	0.280093	0.282526	0.289496	0.29902	0.290171	0.369932	0.371107	0.366458	-1.26195	-0.44853	-0.347972	-0.0187528	-1.26193	0.0235846	0.0256419	0.0929281	-0.00281645	0.145406	0.0400325	0.1995
BNIP2	-1.26197	-1.26197	-1.26197	0.0299384	0.0171241	0.0295268	0.132844	0.151674	0.136704	NA	NA	NA	NA	NA	NA	NA	NA	NA	NA	NA	NA
BNIP3L	-1.26197	-1.26197	-1.26197	-0.453586	-0.454963	-0.2627	0.0443956	0.0778959	0.0862705	-0.971582	0.0609288	-1.26195	-1.26194	-1.26193	-1.26189	-1.26195	-1.26193	-1.26194	-1.26192	-1.26189	-1.26191
BOD1L1	0.152219	0.148898	0.157085	0.105424	0.105123	0.104231	0.125498	0.124187	0.117248	0.23183	0.173921	0.228146	0.269199	0.20247	0.234697	0.136632	0.214251	0.197492	0.143678	0.10282	0.116027
BOLA1	0.136344	0.170446	0.174182	0.232526	0.225443	0.233346	0.0148872	0.0860196	0.0673277	0.037392	0.0674358	0.0110923	-1.26194	-1.26193	-1.26189	-1.26195	0.00492561	-1.26194	-1.26192	0.0752529	0.111138
BOLA2B	0.337679	0.371249	0.355242	0.618091	0.690807	0.637671	0.282046	0.343884	0.30939	0.439453	0.427104	0.43155	0.349981	0.408559	0.413948	0.565429	0.385649	0.457863	0.534811	0.508116	0.533783
BOLA3	0.00871719	0.00742785	-0.0127122	0.132364	0.136704	0.13557	-1.26198	-1.26198	-1.26198	NA	NA	NA	NA	NA	NA	NA	NA	NA	NA	NA	NA
BOP1	0.361645	0.352125	0.344305	0.364867	0.364381	0.366559	0.416148	0.410462	0.418411	0.208496	0.23584	0.189077	0.219918	0.203397	0.2178	0.325708	0.31027	0.314193	0.284277	0.306072	0.311009
BORA	-1.26197	-1.26197	-1.26197	-1.26196	-1.26196	-1.26196	-1.26184	-1.26185	-1.26187	NA	NA	NA	NA	NA	NA	NA	NA	NA	NA	NA	NA
BORCS5	-0.857082	-0.859759	-0.805386	-0.647105	-0.468663	-0.643116	-1.06726	-0.650167	-0.963833	-0.457431	-0.644422	-0.272782	0.0197863	0.108603	0.0839212	-0.155116	-0.451447	-1.26194	-1.26192	0.0762427	-0.149782
BORCS6	-1.164	-0.972011	-0.866601	0.0544516	0.0428576	0.0516686	0.069119	0.0767561	0.0631814	-1.26195	0.0295735	0.080483	0.0539241	0.102559	0.0677367	0.0224068	0.0407519	0.00311225	-0.0701338	-0.0258156	-1.26191
BPGM	0.121692	0.117094	0.124485	-0.963332	-0.965037	-0.969751	-1.26198	-1.26198	-1.26198	0.0686696	0.0747528	0.0846639	0.0586497	0.0778837	0.110796	-0.0536189	0.0694165	0.0179377	-0.00988456	-1.26189	0.0782079
BPHL	0.401447	0.400497	0.405613	0.11263	0.134469	0.113646	0.275484	0.263453	0.255817	0.0749687	0.103877	0.0967215	0.0283389	0.0262086	-0.0321256	0.101282	0.0115605	-0.350921	-1.26192	-1.26189	-1.26191
BPNT1	0.357333	0.356814	0.350605	0.256915	0.248222	0.258837	0.310411	0.306391	0.32761	0.319525	0.334712	0.288838	0.270884	0.283809	0.305764	0.27971	0.278545	0.250046	0.216453	0.263766	0.260521
BPTF	0.211436	0.208458	0.201947	0.137427	0.137018	0.135945	0.16145	0.157172	0.156179	0.0519417	-0.567018	-1.26195	0.229441	0.0524522	0.121458	0.0110923	-0.0312298	0.0291305	0.123394	0.200977	0.0641786
BRAF	0.0921322	0.0799483	0.0752502	-0.0359213	-0.0538871	-0.0487982	0.0423923	0.0389156	0.0490244	NA	NA	NA	NA	NA	NA	NA	NA	NA	NA	NA	NA
BRAP	0.209199	0.203396	0.208293	0.179413	0.182891	0.176716	0.165848	0.16008	0.147699	NA	NA	NA	NA	NA	NA	NA	NA	NA	NA	NA	NA
BRAT1	0.263115	0.243224	0.243599	0.113435	0.122229	0.111858	0.0466213	0.0422981	0.0561383	-0.44909	-1.26195	-0.85712	-1.26194	-1.26193	-0.0506875	0.019343	0.11299	0.00293129	0.194071	0.262318	0.295611
BRCA1	-1.26197	-1.26197	-1.26197	0.0554133	0.0582649	0.0577405	-1.26191	-1.26192	-1.26192	NA	NA	NA	NA	NA	NA	NA	NA	NA	NA	NA	NA
BRCA2	-0.159645	-0.26035	-0.00572329	-1.26196	-1.26196	-1.26196	-1.26198	-1.26198	-1.26198	NA	NA	NA	NA	NA	NA	NA	NA	NA	NA	NA	NA
BRCC3	0.386912	0.380924	0.381048	0.324973	0.336776	0.323451	0.371832	0.369142	0.375373	0.24992	0.235255	0.31291	0.184888	0.242572	0.267584	0.282048	0.193506	0.316168	0.354611	0.331684	0.368754
BRD1	0.189307	0.183319	0.189536	0.0962763	0.081466	0.0940791	0.126315	0.114334	0.108104	0.0967892	0.0222444	0.0904089	0.117964	-0.046281	0.0191843	0.0398996	-1.26193	0.121533	-1.26192	-1.26189	0.0859604
BRD2	0.34364	0.337129	0.3341	0.227682	0.216537	0.223945	0.23262	0.222468	0.232061	0.12652	0.171321	0.147656	0.198906	0.219918	0.160869	0.141319	0.177624	0.111806	0.0676413	0.0404437	0.13159
BRD3	0.259268	0.251958	0.249352	0.217191	0.214321	0.213741	0.254435	0.254035	0.247739	0.19797	0.18863	0.196593	0.120351	0.18601	0.204371	-0.653243	0.0341169	-0.000735989	-0.0611988	0.0652682	-0.250054
BRD4	0.328433	0.327127	0.328755	0.290018	0.297091	0.290656	0.270549	0.267543	0.264333	0.246957	0.268551	0.311997	0.293213	0.258476	0.255687	0.168028	0.16109	0.180343	0.207952	0.167436	0.232599
BRD7	0.140137	0.131301	0.138202	0.134521	0.147699	0.133073	0.240335	0.23675	0.235928	NA	NA	NA	NA	NA	NA	NA	NA	NA	NA	NA	NA
BRD8	0.100404	0.113893	0.142432	0.123415	0.122298	0.115713	0.181633	0.172835	0.175868	NA	NA	NA	NA	NA	NA	NA	NA	NA	NA	NA	NA
BRD9	0.207797	0.19123	0.197439	0.103341	0.10879	0.098777	0.0979069	0.0954886	0.102596	-0.46162	-1.26195	-1.26195	0.104406	-1.26193	-1.26189	-1.26195	-1.26193	-1.26194	-1.26192	-1.26189	-1.26191
BRE	0.294063	0.283677	0.280181	0.301494	0.29084	0.291205	0.247503	0.249413	0.254035	NA	NA	NA	NA	NA	NA	NA	NA	NA	NA	NA	NA
BRF1	0.118398	0.110116	0.126315	0.0777227	0.0846594	0.0852828	-0.258132	-0.260115	-0.456853	NA	NA	NA	NA	NA	NA	NA	NA	NA	NA	NA	NA
BRI3BP	0.685734	0.667081	0.682448	0.470056	0.48298	0.473066	0.44008	0.45871	0.460398	NA	NA	NA	NA	NA	NA	NA	NA	NA	NA	NA	NA
BRIP1	-1.26185	-1.26185	-1.26184	0.0209868	-0.000328092	0.00690408	-1.26189	-1.26189	-1.26189	NA	NA	NA	NA	NA	NA	NA	NA	NA	NA	NA	NA
BRIX1	0.397841	0.3943	0.399585	0.36501	0.360648	0.372059	0.344853	0.325364	0.330202	0.313786	0.321615	0.31335	0.283289	0.313786	0.346871	0.491379	0.450044	0.419624	0.46312	0.435807	0.455363
BRK1	0.221438	0.228498	0.218372	0.324498	0.333315	0.330501	0.0186401	0.0735225	0.0557607	0.0961191	0.165926	0.0929281	0.127028	0.0867295	0.114097	-0.348295	0.0912032	0.0795517	0.140103	0.215042	0.218
BRMS1	0.285051	0.282426	0.273864	0.179458	0.19123	0.176281	0.124338	0.120397	0.117772	-0.045213	-1.26195	-1.26195	0.0698262	-0.349639	-1.26189	-1.26195	0.0581073	-0.00638521	0.0517656	-1.26189	-1.26191
BRMS1L	0.25207	0.238985	0.231704	-0.0052244	0.012733	-0.0049375	0.119534	0.117032	0.124338	NA	NA	NA	NA	NA	NA	NA	NA	NA	NA	NA	NA
BROX	0.302157	0.289387	0.300092	0.265455	0.256828	0.263868	0.173093	0.189987	0.197573	0.198207	0.199192	0.227019	0.235125	0.25344	0.27236	0.214041	0.214669	0.153627	0.163334	0.198906	0.160638
BRPF1	0.175155	0.173464	0.173979	0.0534785	0.0532579	0.0542474	0.117169	0.110116	0.110215	0.130786	0.0993742	0.135353	0.0903123	-0.0500767	0.159082	-0.0208952	0.00311225	-0.648578	-1.26192	-1.26189	-1.26191
BRWD1	-0.0322255	-0.0343066	-0.0419768	-1.26194	-1.26195	-1.26194	-0.243255	-0.239571	-0.148513	NA	NA	NA	NA	NA	NA	NA	NA	NA	NA	NA	NA
BRWD3	-0.012086	-0.030198	-0.0234913	-1.262	-1.262	-1.262	0.0222545	0.0164505	0.0188024	NA	NA	NA	NA	NA	NA	NA	NA	NA	NA	NA	NA
BSCL2	0.0272815	0.0275942	0.0173204	-0.865044	-0.930102	-0.862079	-0.356458	-0.153759	-0.0584195	NA	NA	NA	NA	NA	NA	NA	NA	NA	NA	NA	NA
BSDC1	-1.26197	-1.26197	-1.26197	-0.0148463	-0.0151572	-0.0168355	-0.252427	-0.0331088	-0.64261	0.00592004	-0.0163409	-0.0416808	-1.26194	-1.26193	-1.26189	0.0436889	-0.457841	-0.0388402	-1.26192	0.0834059	-0.260632
BSG	0.18759	0.194592	0.205165	0.590501	0.618091	0.602606	0.682448	0.698352	0.711474	0.251608	0.236291	0.27664	0.253132	0.225807	0.224517	0.32667	0.327482	0.313062	0.288569	0.288569	0.311831
BSPRY	-1.26184	-1.26184	-1.26183	-1.262	-1.262	-1.262	-1.06951	-0.64768	-0.645705	NA	NA	NA	NA	NA	NA	NA	NA	NA	NA	NA	NA
BST2	0.212796	0.213909	0.207889	0.297932	0.290171	0.281657	0.348007	0.350367	0.359833	0.0725848	0.0531091	0.0488823	0.141319	-0.064447	-1.26189	0.12308	0.306497	0.275732	0.2089	0.167556	0.210986
BTAF1	0.173381	0.166101	0.16836	0.171536	0.164633	0.169563	0.208967	0.207693	0.214955	0.111098	0.1073	0.0550827	0.0820344	0.114097	0.0399671	0.155538	0.0932778	0.173751	0.152368	0.135965	0.136333
BTBD1	-0.155814	-0.24538	-0.23907	0.0212548	0.00633509	0.018337	0.106405	0.112515	0.109263	NA	NA	NA	NA	NA	NA	NA	NA	NA	NA	NA	NA
BTBD10	-1.26197	-1.26197	-1.26197	-1.26183	-1.26184	-1.26186	-1.26198	-1.26198	-1.26198	NA	NA	NA	NA	NA	NA	NA	NA	NA	NA	NA	NA
BTBD11	-0.0129332	-0.0340379	-0.0278448	-0.651116	-0.960789	-0.668575	-0.450729	-0.450028	-0.362068	NA	NA	NA	NA	NA	NA	NA	NA	NA	NA	NA	NA
BTBD2	0.0692193	0.0638848	0.0669044	-0.246688	-0.245134	-0.245949	-0.653377	-0.359046	-0.258609	NA	NA	NA	NA	NA	NA	NA	NA	NA	NA	NA	NA
BTBD9	-0.0518936	-0.0610358	-0.248816	0.00413964	0.016743	0.00624007	0.0568851	0.0509515	0.0603651	NA	NA	NA	NA	NA	NA	NA	NA	NA	NA	NA	NA
BTD	-1.26197	-1.26197	-1.26197	-0.26216	-0.152007	-0.0532639	-1.26198	-1.26198	-1.26198	NA	NA	NA	NA	NA	NA	NA	NA	NA	NA	NA	NA
BTF3	0.531409	0.545632	0.53865	0.842894	0.832047	0.835154	0.90747	0.920306	0.901881	0.204644	0.242466	0.204987	0.179534	0.236847	0.227748	0.450912	0.316024	0.355115	0.350466	0.418231	0.396404
BTF3L4	0.297546	0.319853	0.339973	0.440916	0.434824	0.433027	0.344192	0.354259	0.348586	0.298835	0.296278	0.298132	0.202262	0.321106	0.303192	0.375875	0.417393	0.288174	0.278235	0.294946	0.365691
BTG1	-1.26197	-1.26197	-1.26197	0.121482	0.114022	0.119378	0.141546	0.147699	0.160166	-0.245553	-0.254443	-0.0197653	-1.26194	-1.26193	-1.26189	-1.26195	-1.26193	-1.26194	-1.26192	-1.26189	-1.26191
BTLA	0.169563	0.17916	0.182165	0.0272815	0.0524531	0.0299384	0.339728	0.329913	0.332211	NA	NA	NA	NA	NA	NA	NA	NA	NA	NA	NA	NA
BUB1	-1.26197	-1.26197	-1.26197	-0.0409522	-0.0493286	-0.0415786	-1.26198	-1.26198	-1.26198	NA	NA	NA	NA	NA	NA	NA	NA	NA	NA	NA	NA
BUB1B-PAK6	-1.26184	-1.26183	-1.06589	0.227184	0.228498	0.214713	-5.93895e-05	-0.00983047	-0.0262164	NA	NA	NA	NA	NA	NA	NA	NA	NA	NA	NA	NA
BUB3	0.573609	0.551573	0.557814	0.55488	0.556787	0.547021	0.58226	0.559421	0.565938	0.396868	0.394824	0.392439	0.474367	0.441003	0.430823	0.42223	0.408559	0.378942	0.388688	0.388688	0.345152
BUD13	0.143937	0.13876	0.140897	0.0629299	0.0647346	0.0570741	0.151959	0.139027	0.136344	0.0435689	-1.26195	0.0581073	-0.0321256	0.0719347	0.0313572	-0.488205	-1.26193	-0.0305803	-0.00680232	0.0265013	0.00125168
BUD23	0.391121	0.397576	0.397841	0.314949	0.327501	0.314201	0.373551	0.366559	0.36907	0.021691	0.0974453	0.0895112	0.0612334	0.170424	0.178878	0.23712	0.063722	0.139004	0.0570306	0.146055	-0.0133305
BUD31	0.645933	0.66144	0.627934	0.560931	0.557543	0.55856	0.544195	0.526669	0.536671	0.294648	0.291072	0.280324	0.315322	0.295339	0.288569	0.258324	0.3364	0.305114	0.335796	0.231418	0.302569
BYSL	0.358912	0.350078	0.348007	0.342369	0.349849	0.343738	0.388591	0.376055	0.383344	0.196143	0.169342	0.146738	0.12469	0.142628	0.132158	0.27521	0.273652	0.277646	0.367868	0.372436	0.369791
BZW1	0.674881	0.647652	0.641687	0.574047	0.55488	0.569675	0.583022	0.562666	0.58226	0.315573	0.286129	0.297849	0.307446	0.347737	0.312766	0.362976	0.343724	0.297053	0.403126	0.46452	0.459035
BZW2	0.502583	0.496247	0.505406	0.339728	0.327235	0.33523	0.443729	0.440725	0.45005	-0.0197653	0.0829382	-0.00423145	0.112688	0.136917	0.149845	0.20066	0.156171	0.155538	0.261661	0.244752	0.252989
C10orf88	0.050375	0.051896	0.0432358	0.000824615	-0.00559819	-0.00941525	0.193274	0.181778	0.173517	NA	NA	NA	NA	NA	NA	NA	NA	NA	NA	NA	NA
C11orf54	-1.26197	-1.26197	-1.26197	0.069119	0.0714655	0.0797209	-0.0344964	0.00139486	-0.011589	0.30471	0.278545	0.269199	0.209279	0.250762	0.26519	0.311111	0.27076	0.303328	0.27664	0.292756	0.247903
C11orf57	0.255621	0.25125	0.265602	0.138125	0.155526	0.140303	0.235678	0.234252	0.238362	NA	NA	NA	NA	NA	NA	NA	NA	NA	NA	NA	NA
C11orf58	0.210541	0.260247	0.257627	0.49231	0.492786	0.491854	0.575056	0.583673	0.599695	NA	NA	NA	NA	NA	NA	NA	NA	NA	NA	NA	NA
C11orf68	0.316998	0.339973	0.333657	0.219503	0.221186	0.217785	0.306234	0.316746	0.31519	0.135965	0.144299	0.179455	0.0690182	0.134516	0.132617	0.0852253	0.114416	0.0970493	-0.039561	-1.26189	-1.26191
C11orf98	0.60196	0.594708	0.599695	0.395546	0.396859	0.384169	0.449885	0.441107	0.447888	0.243188	0.271359	0.224517	0.266915	0.264089	0.269442	0.193337	0.206544	0.208496	0.193337	0.279452	0.250901
C12orf10	0.318526	0.334587	0.338135	0.443551	0.445888	0.452053	0.405481	0.407981	0.41549	0.244213	0.211721	0.201074	0.201074	0.220223	0.0995759	0.153038	0.278786	0.098629	0.236291	0.262222	0.269393
C12orf29	0.0257629	0.02651	0.00071119	-1.26189	-1.26184	-1.26189	-1.26198	-1.26198	-1.26198	NA	NA	NA	NA	NA	NA	NA	NA	NA	NA	NA	NA
C12orf4	-0.454663	-0.637318	-0.646033	-0.148513	-0.153759	-0.0465057	-0.0164382	-0.0109321	0.00166441	NA	NA	NA	NA	NA	NA	NA	NA	NA	NA	NA	NA
C12orf43	0.245569	0.238658	0.246124	0.202287	0.202565	0.204384	0.251789	0.246537	0.24485	NA	NA	NA	NA	NA	NA	NA	NA	NA	NA	NA	NA
C12orf45	-0.00781148	0.00453753	0.0173981	0.0450127	0.0342323	0.0297781	0.142292	0.132892	0.121525	-1.26195	-1.26195	-1.26195	-1.26194	-1.26193	-1.26189	-1.26195	-1.26193	-1.26194	-1.26192	-1.26189	-1.26191
C12orf57	-0.655802	-0.651238	-0.660533	-1.26189	-1.26187	-1.26185	-1.26198	-1.26198	-1.26198	-1.26195	-1.26195	-1.26195	-1.26194	-1.26193	-0.0468124	-1.26195	-1.26193	-0.698283	-0.00443531	0.125797	0.116787
C12orf65	0.233851	0.235617	0.227754	0.00129019	-0.0184682	-0.0131901	0.108341	0.109772	0.127892	NA	NA	NA	NA	NA	NA	NA	NA	NA	NA	NA	NA
C15orf39	-1.26187	-1.26184	-1.26186	-1.26196	-1.26195	-1.26196	-1.26198	-1.26198	-1.26198	NA	NA	NA	NA	NA	NA	NA	NA	NA	NA	NA	NA
C15orf40	0.142597	0.163803	0.182502	0.0771812	0.0595527	0.0824645	-1.26198	-1.26198	-1.26198	0.0351568	0.0620619	-1.26195	0.0091946	0.098629	0.00581755	-0.0047994	-1.26193	-0.257079	0.0468842	-1.26189	0.106781
C15orf41	0.0882111	0.0875694	0.0845866	0.0851326	0.0843348	0.0921322	-0.664711	-0.651691	-0.462077	NA	NA	NA	NA	NA	NA	NA	NA	NA	NA	NA	NA
C15orf48	0.00425473	-0.011589	0.00734505	0.31664	0.319853	0.337275	-1.26198	-1.26198	-1.26198	NA	NA	NA	NA	NA	NA	NA	NA	NA	NA	NA	NA
C15orf61	0.0331065	0.0427895	0.048867	-1.262	-1.262	-1.262	0.0797971	0.100685	0.0971779	NA	NA	NA	NA	NA	NA	NA	NA	NA	NA	NA	NA
C16orf54	-1.26197	-1.26197	-1.26197	0.0554847	0.044782	0.080238	-0.477594	-0.454073	-0.562767	0.059176	0.0477793	0.166498	0.095243	0.021313	-1.26189	-1.26195	-1.26193	-1.26194	-1.26192	-1.26189	-1.26191
C16orf58	0.177884	0.168236	0.165895	0.10221	0.108718	0.101843	0.0146652	0.00299224	0.00568435	0.146984	0.131689	0.134692	0.0184744	0.0942606	0.0451202	0.197161	0.129594	0.133329	0.0136982	-0.0124711	0.0573054
C16orf70	0.0906334	0.0874493	0.0939282	-0.66664	-1.26185	-1.06629	0.00399426	0.0233764	0.0177798	NA	NA	NA	NA	NA	NA	NA	NA	NA	NA	NA	NA
C16orf72	-0.0289875	-0.0142342	-0.0264661	-1.26196	-1.26196	-1.26196	-0.166397	-0.0628976	-0.0562753	NA	NA	NA	NA	NA	NA	NA	NA	NA	NA	NA	NA
C16orf87	0.070645	0.0928517	0.0801511	0.134959	0.122514	0.139264	0.174598	0.178897	0.191916	NA	NA	NA	NA	NA	NA	NA	NA	NA	NA	NA	NA
C16orf91	-1.26197	-1.26197	-1.26197	-0.655665	-0.251286	-0.260581	-1.26198	-1.26198	-1.26198	NA	NA	NA	NA	NA	NA	NA	NA	NA	NA	NA	NA
C17orf49	0.267088	0.31582	0.33586	0.102983	0.100491	0.107339	-0.257837	-0.154227	-0.449474	NA	NA	NA	NA	NA	NA	NA	NA	NA	NA	NA	NA
C17orf75	0.0861116	0.0777896	0.079877	0.138324	0.131484	0.142562	0.0850592	0.0872875	0.0972245	-1.26195	-0.860719	-0.250054	-1.26194	-1.26193	-1.26189	-0.157998	-1.26193	-1.26194	-0.0109432	-1.26189	-1.26191
C17orf80	-1.26197	-1.26197	-1.26197	-1.262	-1.262	-1.262	-0.26469	-0.355969	-0.464571	NA	NA	NA	NA	NA	NA	NA	NA	NA	NA	NA	NA
C18orf21	0.226375	0.227523	0.226375	0.114826	0.116125	0.110868	0.100629	0.0964599	0.11002	NA	NA	NA	NA	NA	NA	NA	NA	NA	NA	NA	NA
C18orf25	-1.26197	-1.26197	-1.26197	-0.454073	-0.646145	-0.471873	0.0724307	0.0625621	0.0359716	-1.26195	-1.26195	-1.26195	-1.26194	-1.26193	-1.26189	-1.26195	-1.26193	-1.26194	-1.26192	-1.26189	-1.26191
C18orf32	-0.038462	-0.022076	-0.0397779	0.0562431	0.0224845	0.056794	-1.26198	-1.26198	-1.26198	NA	NA	NA	NA	NA	NA	NA	NA	NA	NA	NA	NA
C18orf8	0.146976	0.145762	0.141798	0.158232	0.163919	0.167319	0.121889	0.12215	0.128712	NA	NA	NA	NA	NA	NA	NA	NA	NA	NA	NA	NA
C19orf12	0.395546	0.365608	0.32411	0.24485	0.261263	0.234468	0.40116	0.420061	0.42527	NA	NA	NA	NA	NA	NA	NA	NA	NA	NA	NA	NA
C19orf38	0.0476714	0.083586	0.0905722	-1.262	-1.262	-1.262	-1.26198	-1.26198	-1.26198	NA	NA	NA	NA	NA	NA	NA	NA	NA	NA	NA	NA
C19orf47	0.11673	0.121692	0.120397	0.126583	0.13025	0.130064	0.121013	0.119234	0.119534	NA	NA	NA	NA	NA	NA	NA	NA	NA	NA	NA	NA
C19orf54	-0.663443	-0.657771	-0.644497	-1.26191	-1.2619	-1.2619	-0.00235878	0.00368898	0.0057725	NA	NA	NA	NA	NA	NA	NA	NA	NA	NA	NA	NA
C1GALT1	0.100945	0.101174	0.0984015	0.147699	0.139206	0.148576	0.191916	0.197509	0.188227	NA	NA	NA	NA	NA	NA	NA	NA	NA	NA	NA	NA
C1GALT1C1	0.0626936	0.0602591	0.0688085	0.0429413	0.0441365	0.048582	-1.26198	-1.26198	-1.26186	NA	NA	NA	NA	NA	NA	NA	NA	NA	NA	NA	NA
C1orf112	-1.26197	-1.26197	-1.26197	-1.26193	-1.26194	-1.26194	-0.352685	-0.160902	-0.15923	NA	NA	NA	NA	NA	NA	NA	NA	NA	NA	NA	NA
C1orf122	-0.00208544	-0.0052244	-0.00769973	-1.262	-1.262	-1.262	-1.26198	-1.26198	-1.26198	NA	NA	NA	NA	NA	NA	NA	NA	NA	NA	NA	NA
C1orf131	0.275667	0.275484	0.276751	0.176806	0.170968	0.166788	0.370201	0.361837	0.368426	NA	NA	NA	NA	NA	NA	NA	NA	NA	NA	NA	NA
C1orf174	0.273694	0.275794	0.274864	0.106128	0.124338	0.106595	0.324605	0.330626	0.329152	0.149386	0.110044	0.123699	0.075809	0.198047	0.171638	0.147656	0.188458	0.120227	0.155923	0.179455	0.16795
C1orf198	-1.26197	-1.26197	-1.26197	-1.262	-1.262	-1.262	-0.0306383	-0.00146028	-0.0188846	NA	NA	NA	NA	NA	NA	NA	NA	NA	NA	NA	NA
C1orf35	0.384413	0.36705	0.355759	0.158865	0.15607	0.152105	0.313705	0.286763	0.28747	NA	NA	NA	NA	NA	NA	NA	NA	NA	NA	NA	NA
C1orf43	0.00926937	0.0171241	0.00299224	-0.465475	-0.649754	-0.468243	0.0150252	0.0288805	0.0344494	NA	NA	NA	NA	NA	NA	NA	NA	NA	NA	NA	NA
C1orf50	-1.26197	-1.26197	-1.26197	-1.26196	-1.26195	-1.26194	-1.2619	-1.26187	-1.26191	-0.653735	-0.365065	-1.26195	-1.26194	-1.26193	-1.26189	-1.26195	-1.26193	-1.26194	-1.26192	-1.26189	-1.26191
C1orf52	-1.26197	-1.26197	-1.26197	0.129436	0.136636	0.135876	0.179654	0.183577	0.174867	-1.26195	-1.26195	-1.26195	-1.26194	-1.26193	-1.26189	-1.26195	-1.26193	-1.26194	-1.26192	-1.26189	-1.26191
C1QBP	0.348007	0.387703	0.4061	0.654241	0.69413	0.649391	0.878033	0.866101	0.837841	0.454234	0.452961	0.452961	0.378715	0.290583	0.310725	0.479181	0.721221	0.62566	0.609137	0.50005	0.559265
C20orf27	0.155526	0.15329	0.159627	-0.561736	-0.457337	-0.648305	0.108201	0.110073	0.123556	0.104584	0.0927772	0.125216	0.095787	0.0988073	0.0711006	0.128761	-0.0153417	0.0941378	0.156411	0.163777	0.123603
C21orf91	0.142292	0.147699	0.13483	0.184975	0.181148	0.181006	0.199208	0.206178	0.224559	NA	NA	NA	NA	NA	NA	NA	NA	NA	NA	NA	NA
C2CD2	-1.26197	-1.26197	-1.26197	-1.26199	-1.26198	-1.26198	-1.07117	-1.26183	-1.26184	NA	NA	NA	NA	NA	NA	NA	NA	NA	NA	NA	NA
C2CD2L	0.0362653	0.0291307	0.0364943	0.115105	0.115713	0.119048	0.0644722	0.0673277	0.0809107	NA	NA	NA	NA	NA	NA	NA	NA	NA	NA	NA	NA
C2CD3	-0.265509	-0.405247	-0.359685	-0.452575	-0.471873	-0.547982	-1.26198	-1.26198	-1.26198	NA	NA	NA	NA	NA	NA	NA	NA	NA	NA	NA	NA
C2CD5	0.11192	0.105891	0.108479	0.0387955	0.0371931	0.0343583	0.0179844	0.025171	0.0284752	0.183175	0.17577	0.184567	0.222152	0.172079	0.154405	0.148043	0.174142	0.107535	0.100809	0.155097	0.151775
C2orf49	0.176011	0.18536	0.184626	0.186786	0.191041	0.179934	0.147853	0.154336	0.157648	-1.26195	-1.26195	-1.26195	-0.0422744	0.000890864	-1.26189	-1.26195	-1.26193	-1.26194	-0.0363216	-0.0182701	-0.0382026
C2orf68	-1.26197	-1.26197	-1.26197	-0.648087	-0.444901	-0.646145	-1.26198	-1.26198	-1.26198	NA	NA	NA	NA	NA	NA	NA	NA	NA	NA	NA	NA
C2orf69	-1.26197	-1.26197	-1.26197	-1.26194	-1.26193	-1.26193	-1.26198	-1.26198	-1.26198	NA	NA	NA	NA	NA	NA	NA	NA	NA	NA	NA	NA
C2orf76	0.056794	0.050375	0.0499606	-1.262	-1.262	-1.262	0.10294	0.113826	0.115552	NA	NA	NA	NA	NA	NA	NA	NA	NA	NA	NA	NA
C3orf33	0.00253209	-5.93895e-05	-0.00688328	-1.262	-1.262	-1.262	-1.26198	-1.26198	-1.26198	NA	NA	NA	NA	NA	NA	NA	NA	NA	NA	NA	NA
C3orf38	0.075379	0.0683817	0.0754773	0.0971779	0.117169	0.103029	-0.245505	-0.270436	-0.349299	-1.26195	-1.26195	-1.26195	-1.26194	-1.26193	-1.26189	-0.667283	-1.26193	0.0485874	-1.26192	-1.26189	-0.0611988
C5orf15	-1.26197	-1.26197	-1.26197	-1.26188	-1.26185	-1.26185	-0.0465057	-0.00969851	-0.0294976	NA	NA	NA	NA	NA	NA	NA	NA	NA	NA	NA	NA
C5orf22	-0.0256521	-0.00146028	0.0139655	0.15607	0.160849	0.15748	0.162446	0.17065	0.180246	-1.26195	0.00581755	-1.26195	-0.445454	-1.26193	-1.26189	0.0659293	-1.26193	0.0484877	-1.26192	0.146984	-1.26191
C5orf24	0.281041	0.296365	0.275846	0.165207	0.165449	0.167868	0.124655	0.174598	0.147371	NA	NA	NA	NA	NA	NA	NA	NA	NA	NA	NA	NA
C5orf30	-1.26197	-1.26197	-1.26197	-0.656403	-0.663791	-0.354754	-1.26198	-1.26198	-1.26198	NA	NA	NA	NA	NA	NA	NA	NA	NA	NA	NA	NA
C5orf51	0.0194567	0.0193588	0.015883	-0.0174633	-0.00655827	-0.0148463	0.0136311	0.0174943	0.0428869	-1.26195	-0.016768	-0.240059	-1.26194	-1.26193	-1.26189	0.14174	0.0239449	0.128761	-0.00145209	-1.26189	0.0947362
C6orf136	0.116805	0.131552	0.126782	0.10475	0.110073	0.102524	-0.015608	-0.000125366	-0.00246016	NA	NA	NA	NA	NA	NA	NA	NA	NA	NA	NA	NA
C6orf47	-0.0182202	-0.0180663	-0.00872737	0.0818768	0.0828134	0.0778959	-1.26198	-1.26198	-1.26198	NA	NA	NA	NA	NA	NA	NA	NA	NA	NA	NA	NA
C6orf89	-1.26197	-1.26197	-1.26197	-0.241029	-0.239409	-0.153144	-1.26189	-1.26188	-1.26189	NA	NA	NA	NA	NA	NA	NA	NA	NA	NA	NA	NA
C7orf25	-0.033814	-0.0322255	-0.0444829	0.0234957	0.0399057	0.0248077	0.0389156	0.0398138	0.0369096	NA	NA	NA	NA	NA	NA	NA	NA	NA	NA	NA	NA
C7orf26	0.149655	0.126705	0.130169	0.0842618	0.0974977	0.0856938	0.0565436	0.039714	0.0618451	NA	NA	NA	NA	NA	NA	NA	NA	NA	NA	NA	NA
C7orf43	-0.0180663	-0.00872737	-0.0122542	-1.16926	-0.865951	-0.861459	-0.450028	-0.25164	-0.360986	NA	NA	NA	NA	NA	NA	NA	NA	NA	NA	NA	NA
C7orf50	0.359593	0.35336	0.358025	0.112715	0.122898	0.108606	0.511123	0.514267	0.496494	0.205093	0.216555	0.229325	0.191332	0.235125	0.217164	0.0905188	0.116603	0.0654534	0.149386	0.202372	0.154006
C8orf33	0.267865	0.265984	0.269061	0.223534	0.223442	0.216604	0.252893	0.251883	0.243599	0.0513588	-1.26195	-0.45419	-1.26194	0.0810605	-1.26189	-0.000735989	0.0505564	0.0403256	0.0622336	0.181675	0.144126
C8orf37	0.154445	0.160703	0.156017	0.143112	0.156939	0.14328	0.116462	0.128204	0.130064	NA	NA	NA	NA	NA	NA	NA	NA	NA	NA	NA	NA
C8orf76	-1.26197	-1.26197	-1.26197	-1.262	-1.262	-1.262	-0.010766	0.00187608	0.0229932	NA	NA	NA	NA	NA	NA	NA	NA	NA	NA	NA	NA
C8orf82	0.171802	0.176806	0.163996	0.0997704	0.0832459	0.09712	0.160323	0.169965	0.155847	-0.00842717	0.00233538	0.0482945	-0.150456	0.0157069	0.0543967	-0.0204773	-0.0126245	-0.00756136	-0.150456	-1.26189	-1.26191
C9orf40	-1.26197	-1.26197	-1.26197	-1.262	-1.262	-1.262	-0.85797	-0.248218	-1.16512	NA	NA	NA	NA	NA	NA	NA	NA	NA	NA	NA	NA
C9orf64	0.472486	0.479238	0.473324	0.399121	0.393264	0.393383	0.437299	0.435731	0.447383	0.0571809	0.104901	0.0543203	0.0808822	0.0452319	0.103229	-1.26195	0.0306821	-0.0663663	0.25286	0.182785	0.182411
C9orf78	0.342725	0.359462	0.368307	0.312063	0.308495	0.306855	0.358507	0.346558	0.344498	0.176581	0.18601	0.194268	0.161758	0.22403	0.200356	0.195197	0.171033	0.186404	0.0958721	0.199102	0.168513
CA12	-1.26197	-1.26197	-1.26197	-1.26194	-1.26193	-1.26194	-1.26198	-1.26198	-1.26198	NA	NA	NA	NA	NA	NA	NA	NA	NA	NA	NA	NA
CA2	0.183154	0.21675	0.198255	-1.262	-1.262	-1.262	0.288557	0.277883	0.299925	NA	NA	NA	NA	NA	NA	NA	NA	NA	NA	NA	NA
CA5B	-1.26197	-1.26197	-1.26197	0.0777896	0.104471	0.116365	-1.26198	-1.26198	-1.26198	0.202262	0.242866	0.238821	0.16109	0.240949	0.238107	0.0877564	-0.064447	0.036836	-0.356409	-1.26189	-1.26191
CAAP1	0.076417	0.107774	0.11662	0.0607333	0.0622554	0.0619406	0.168003	0.178358	0.170366	NA	NA	NA	NA	NA	NA	NA	NA	NA	NA	NA	NA
CAB39	0.459163	0.451836	0.448631	0.525295	0.521006	0.526669	0.396217	0.387456	0.393929	0.337822	0.328165	0.318831	0.294648	0.294173	0.269199	0.300147	0.280324	0.285031	0.423471	0.403126	0.434652
CAB39L	0.156351	0.156676	0.154336	-0.562767	-0.671564	-0.647508	0.150202	0.145323	0.141675	NA	NA	NA	NA	NA	NA	NA	NA	NA	NA	NA	NA
CABIN1	0.0619406	0.0538934	0.058655	-0.0239723	-0.040355	-0.0281733	0.0526002	0.0569775	0.055211	NA	NA	NA	NA	NA	NA	NA	NA	NA	NA	NA	NA
CACFD1	0.122443	0.119821	0.129436	-0.651393	-0.675337	-0.858519	-0.557358	-0.5674	-0.465984	NA	NA	NA	NA	NA	NA	NA	NA	NA	NA	NA	NA
CACTIN	0.260153	0.254435	0.259348	0.223249	0.22388	0.226914	0.209778	0.195003	0.195689	-0.0115425	0.0390947	0.0451202	0.148116	0.0887855	0.136632	0.196908	0.283666	0.286251	0.0153536	0.135194	0.0428966
CACUL1	0.0134906	0.0255868	0.0307531	0.149291	0.140137	0.148717	0.108543	0.11821	0.105681	NA	NA	NA	NA	NA	NA	NA	NA	NA	NA	NA	NA
CACYBP	0.651884	0.655138	0.633214	0.589607	0.564038	0.574474	0.938324	0.918001	0.918001	0.509291	0.515282	0.520988	0.615459	0.44743	0.457087	0.698545	0.71774	0.705266	0.773416	0.739778	0.742055
CAD	0.330055	0.321266	0.32183	0.434295	0.440725	0.431585	0.487979	0.480476	0.481967	0.372191	0.386475	0.365312	0.374794	0.35494	0.360333	0.45937	0.481972	0.467842	0.532593	0.544135	0.545782
CALCOCO1	-0.0253632	0.00822444	0.00378198	-0.0165182	-0.0119081	-0.0183591	0.0687326	0.0702602	0.0861965	NA	NA	NA	NA	NA	NA	NA	NA	NA	NA	NA	NA
CALCRL	0.227682	0.218372	0.219351	-1.16489	-1.26185	-1.26183	-0.0239723	-0.0432544	-0.0129332	NA	NA	NA	NA	NA	NA	NA	NA	NA	NA	NA	NA
CALHM2	-0.856778	-0.669265	-0.659452	0.0339905	0.0350809	0.0333409	-1.26198	-1.26198	-1.26198	NA	NA	NA	NA	NA	NA	NA	NA	NA	NA	NA	NA
CALHM6	0.0849761	0.0782638	0.0779479	-1.262	-1.262	-1.262	0.102685	0.0855727	0.0841096	NA	NA	NA	NA	NA	NA	NA	NA	NA	NA	NA	NA
CALM1	0.098777	0.0716855	0.105313	1.28969	1.46763	1.41035	0.55488	0.589177	0.557814	NA	NA	NA	NA	NA	NA	NA	NA	NA	NA	NA	NA
CALR	0.801292	0.899524	0.880034	1.8493	1.90087	1.87203	1.61236	1.49732	1.53614	0.918338	0.857632	0.857632	1.04051	0.80004	0.825666	0.867083	0.918338	0.914894	0.742055	0.776112	0.780404
CALU	0.23633	0.321938	0.322175	0.61869	0.617335	0.61869	0.621144	0.621144	0.623187	0.214368	0.230453	0.211592	0.245666	0.129594	0.148731	0.246232	0.210986	0.222995	0.229042	0.238935	0.24207
CAMK1D	0.320165	0.31747	0.316574	0.172165	0.171745	0.168003	0.248889	0.249481	0.262953	0.181499	0.174495	0.142165	0.208361	0.149845	0.186404	-0.017486	-0.0438377	-0.150016	-1.26192	-1.26189	-1.26191
CAMK2D	0.354694	0.348229	0.340794	0.20431	0.198255	0.197686	0.351936	0.370998	0.375622	0.276576	0.267704	0.268695	0.227748	0.238694	0.246699	0.353479	0.291272	0.321615	0.162383	0.163194	0.198325
CAMK2G	0.350699	0.344083	0.339332	0.30175	0.293986	0.301399	0.299485	0.301313	0.302049	0.34825	0.343214	0.352387	0.345152	0.322142	0.331812	0.257425	0.258324	0.268102	0.235125	0.180068	0.212851
CAMK4	0.439183	0.418668	0.417984	0.347003	0.339596	0.341766	0.303547	0.31507	0.321485	0.324067	0.342791	0.328165	0.302076	0.356726	0.349237	0.271683	0.268228	0.288345	0.218313	0.157238	0.162633
CAMKK2	0.122514	0.125661	0.118871	0.0739064	0.0713923	0.0776586	-0.00630348	-0.00808369	-0.0189961	NA	NA	NA	NA	NA	NA	NA	NA	NA	NA	NA	NA
CAMKMT	-0.151807	-0.148513	-0.240365	-1.26196	-1.26195	-1.26196	-1.26188	-1.26188	-1.26185	NA	NA	NA	NA	NA	NA	NA	NA	NA	NA	NA	NA
CAMLG	0.0681506	0.0665941	0.0665941	-1.262	-1.262	-1.262	0.0740493	0.0875694	0.0745928	NA	NA	NA	NA	NA	NA	NA	NA	NA	NA	NA	NA
CAMSAP1	-0.653966	-0.672855	-0.650431	-1.26187	-1.26189	-1.26187	-0.0472741	-0.0387259	-0.0666306	NA	NA	NA	NA	NA	NA	NA	NA	NA	NA	NA	NA
CAMSAP2	-0.959265	-1.06951	-1.26184	-1.26197	-1.26197	-1.26196	-1.26187	-1.26186	-1.26187	NA	NA	NA	NA	NA	NA	NA	NA	NA	NA	NA	NA
CAND1	0.523724	0.507651	0.505734	0.417446	0.415325	0.418411	0.418865	0.421438	0.422984	0.756045	0.714717	0.7162	0.67248	0.652272	0.654866	0.689469	0.659966	0.712981	0.746482	0.680836	0.794091
CAND2	0.126233	0.115483	0.113511	0.113735	0.114117	0.106669	0.00108614	0.00337084	0.0176299	NA	NA	NA	NA	NA	NA	NA	NA	NA	NA	NA	NA
CANT1	0.161069	0.158938	0.15659	0.13557	0.140303	0.135635	0.161266	0.156498	0.156745	NA	NA	NA	NA	NA	NA	NA	NA	NA	NA	NA	NA
CANX	0.641687	0.61869	0.625507	0.765228	0.799134	0.755912	0.905094	0.837841	0.805709	0.571895	0.597029	0.565429	0.528645	0.501893	0.521473	0.558571	0.577734	0.565429	0.528137	0.538972	0.579572
CAP1	1.50887	1.41035	1.41035	0.946756	0.927641	0.938324	0.929502	0.962085	0.958489	1.41463	1.492	1.492	1.492	1.67223	1.64476	1.58507	1.20268	1.37838	1.38932	1.36726	1.2566
CAPG	0.547389	0.548137	0.544886	0.651884	0.589177	0.612504	0.579748	0.561143	0.552784	0.476908	0.47848	0.467527	0.497171	0.454	0.449783	0.374225	0.38285	0.427342	0.327106	0.323269	0.33986
CAPN1	0.658393	0.641687	0.636841	0.444647	0.452738	0.448631	0.475046	0.475046	0.480476	0.586506	0.580213	0.584266	0.641561	0.572796	0.612002	0.447837	0.429901	0.48961	0.44924	0.466922	0.418639
CAPN15	0.0135491	-0.00128873	0.000616415	-0.675337	-0.864	-0.678737	0.0482619	0.0348234	0.0327421	NA	NA	NA	NA	NA	NA	NA	NA	NA	NA	NA	NA
CAPN2	0.392234	0.379002	0.381237	0.546347	0.544886	0.560931	0.289663	0.279079	0.269168	0.545782	0.540349	0.572796	0.525994	0.556974	0.553152	0.489213	0.475026	0.542115	0.378715	0.353479	0.364972
CAPN7	0.117321	0.111858	0.108718	0.0620346	0.0579913	0.062777	0.0934314	0.085642	0.0861116	0.0977662	0.0638513	0.111519	0.131689	0.038879	0.0101138	-0.0588509	-1.26193	-0.246608	-1.26192	-1.26189	-1.26191
CAPNS1	0.318361	0.316689	0.319313	0.560239	0.554327	0.561143	0.36685	0.363339	0.368681	0.486512	0.514254	0.503074	0.444433	0.459886	0.441571	0.40596	0.371138	0.422969	0.482783	0.462796	0.451185
CAPRIN1	0.23731	0.262283	0.285398	0.457153	0.433814	0.454017	0.48738	0.474653	0.45536	0.157161	0.164177	0.191151	0.0913226	0.184206	0.155447	0.418639	0.367154	0.353148	0.441861	0.43313	0.457602
CAPZA1	1.29757	1.30903	1.34258	0.967166	0.972357	0.946756	0.89543	0.915773	0.930999	0.895365	0.96599	0.892205	0.895365	0.841908	0.823588	0.825666	0.906359	0.906359	0.8113	0.818689	0.879696
CAPZA2	0.758143	0.747794	0.752562	0.782145	0.829181	0.810541	0.641687	0.643172	0.665539	0.434562	0.457374	0.457863	0.415743	0.425431	0.420068	0.435504	0.434652	0.460213	0.437407	0.479181	0.529175
CAPZB	1.5279	1.48541	1.47533	0.981741	0.958489	0.975992	0.989344	0.995863	1.05248	0.922117	0.873508	0.873508	1.186	0.906359	0.870962	0.665961	0.643883	0.58917	0.574388	0.536206	0.557533
CARD11	0.310664	0.307627	0.30736	0.246537	0.254274	0.25536	0.15002	0.147107	0.160249	0.199693	0.158878	0.18351	0.219638	0.209531	0.165509	0.226149	0.18064	0.0300995	-1.26192	-1.26189	-1.26191
CARD6	0.128637	0.113735	0.117772	-1.2619	-1.26188	-1.26189	-0.642704	-0.645705	-0.645906	NA	NA	NA	NA	NA	NA	NA	NA	NA	NA	NA	NA
CARHSP1	-1.26197	-1.26197	-1.26197	0.271058	0.258222	0.276668	-1.26198	-1.26198	-1.26198	0.25344	0.23835	0.231418	0.209766	0.252628	0.271785	0.270517	0.245584	0.260404	0.258476	0.277253	0.203664
CARKD	0.228564	0.218555	0.219287	0.271753	0.271912	0.274864	0.248505	0.250125	0.267865	NA	NA	NA	NA	NA	NA	NA	NA	NA	NA	NA	NA
CARM1	0.206178	0.206931	0.206224	0.145222	0.149655	0.148396	0.257931	0.261412	0.285217	0.0877564	0.0598791	0.0677367	0.0438107	0.167684	0.140352	0.170424	-0.15644	0.132839	0.0865595	0.0369897	-1.26191
CARMIL1	-1.26197	-1.26197	-1.26197	-0.00915548	0.00950284	0.0058447	-1.26198	-1.26198	-1.26198	NA	NA	NA	NA	NA	NA	NA	NA	NA	NA	NA	NA
CARMIL2	0.207693	0.202791	0.202224	0.213644	0.220278	0.216537	0.188709	0.183415	0.178636	0.296726	0.281501	0.30224	0.216555	0.231912	0.254069	0.284277	0.26025	0.204644	0.324836	0.232365	0.19586
CARNMT1	-0.00663206	-0.0221854	-0.0148463	0.139783	0.145931	0.145576	0.160927	0.15969	0.158938	NA	NA	NA	NA	NA	NA	NA	NA	NA	NA	NA	NA
CARS1	0.2669	0.262424	0.266234	0.337419	0.322669	0.334229	0.39053	0.388834	0.416566	NA	NA	NA	NA	NA	NA	NA	NA	NA	NA	NA	NA
CARS2	0.212877	0.212319	0.215574	0.107717	0.11519	0.111178	0.122068	0.114967	0.107411	0.123842	0.140726	0.155538	0.195763	0.170934	0.144396	0.0285088	0.0634082	0.0361732	0.0463895	-0.00923531	-1.26191
CASC3	0.213278	0.232061	0.234824	0.199798	0.198839	0.195188	0.176932	0.170595	0.163494	NA	NA	NA	NA	NA	NA	NA	NA	NA	NA	NA	NA
CASC4	-0.865361	-0.964104	-0.859566	-0.0151572	-0.012086	-0.0198523	-1.26191	-1.26187	-0.659953	NA	NA	NA	NA	NA	NA	NA	NA	NA	NA	NA	NA
CASC5	-0.157484	-0.243105	-0.150099	0.02651	0.0226135	0.0259419	-1.26192	-1.26192	-1.26192	NA	NA	NA	NA	NA	NA	NA	NA	NA	NA	NA	NA
CASD1	-0.356458	-0.268203	-0.364826	-0.659452	-0.681777	-0.676957	-1.26184	-1.16387	-1.26183	NA	NA	NA	NA	NA	NA	NA	NA	NA	NA	NA	NA
CASP1	0.000114694	0.00337084	-0.00886705	0.369371	0.384413	0.387456	0.183415	0.159526	0.170294	0.352175	0.353402	0.357133	0.370012	0.405367	0.379848	0.383571	0.311228	0.326519	0.320801	0.31913	0.306072
CASP2	0.234047	0.23821	0.238126	0.190834	0.193498	0.188973	0.179851	0.194011	0.19915	-1.26195	-0.562018	-1.26195	-1.26194	-1.26193	-1.26189	-1.26195	-0.0536189	-1.26194	0.0102999	-0.00662317	0.00511633
CASP3	0.325468	0.31032	0.306316	0.710625	0.743509	0.720417	0.387604	0.358912	0.372208	-0.653243	-0.861402	-1.26195	0.00846624	0.0449853	0.133772	0.0600105	0.0687953	0.0341169	0.0528331	0.0910423	0.0910423
CASP4	-1.26197	-1.26197	-1.26197	0.0700257	0.0616556	0.0671043	-0.673737	-0.767978	-0.960399	0.0313572	0.047526	0.0608154	0.129779	0.145708	0.15196	0.115181	0.117576	0.0643829	0.0335992	0.102471	0.122833
CASP6	0.367225	0.381382	0.37482	0.448809	0.429498	0.438256	0.296283	0.318526	0.323562	0.17847	0.197589	0.211991	0.21572	0.208063	0.217512	0.0682864	0.116925	0.121344	-1.26192	-1.26189	-1.26191
CASP7	0.0903099	0.102983	0.0966059	0.140963	0.150452	0.151427	0.134174	0.124261	0.132007	-0.676752	-1.26195	-1.26195	0.0811931	0.0335992	-1.26189	-1.26195	0.055462	-0.0530054	-1.26192	-0.0319129	-1.26191
CASP8	0.501855	0.511818	0.512209	0.617335	0.595625	0.618091	0.377147	0.374004	0.388484	0.162383	0.134312	0.162179	0.209442	0.127028	0.136917	0.203174	0.250405	0.204062	0.0763533	0.130868	0.0863402
CASP8AP2	-1.26186	-1.26186	-1.26185	-0.255691	-0.355224	-0.257837	-0.651238	-0.650084	-0.650596	NA	NA	NA	NA	NA	NA	NA	NA	NA	NA	NA	NA
CASP9	0.0246738	0.0289501	0.01335	-1.262	-1.262	-1.262	-1.26191	-1.2619	-1.26189	NA	NA	NA	NA	NA	NA	NA	NA	NA	NA	NA	NA
CASQ1	0.0837323	-0.356925	-0.0744831	-1.262	-1.262	-1.262	-1.26198	-1.26198	-1.26198	NA	NA	NA	NA	NA	NA	NA	NA	NA	NA	NA	NA
CASS4	-0.863276	-0.86461	-0.863276	0.049085	0.0643393	0.0573413	-1.26198	-1.26198	-1.26198	NA	NA	NA	NA	NA	NA	NA	NA	NA	NA	NA	NA
CAST	0.50366	0.51459	0.520344	0.526669	0.519206	0.52741	0.384169	0.377819	0.375252	0.551217	0.550006	0.546816	0.636322	0.519149	0.501893	0.536206	0.549235	0.551217	0.488806	0.476054	0.466575
CASTOR1	0.112976	0.115282	0.114403	0.194224	0.196992	0.192423	-1.26198	-1.26198	-1.26198	NA	NA	NA	NA	NA	NA	NA	NA	NA	NA	NA	NA
CAT	0.387931	0.389454	0.386761	0.368307	0.383624	0.375373	0.331801	0.328433	0.326555	0.421387	0.426018	0.416258	0.445034	0.442635	0.430348	0.38285	0.380497	0.422726	0.271683	0.260108	0.318121
CBFA2T2	-1.26186	-1.26187	-1.26185	-1.26198	-1.26199	-1.26199	-0.0679428	-0.0421586	-0.0310215	NA	NA	NA	NA	NA	NA	NA	NA	NA	NA	NA	NA
CBFB	0.515275	0.589177	0.568656	0.667081	0.651884	0.655138	0.607005	0.602606	0.585513	0.283469	0.317191	0.293943	0.325579	0.400966	0.433374	0.277253	0.259749	0.220223	0.276508	0.269791	0.241459
CBL	0.29849	0.274148	0.282254	0.261263	0.252387	0.260759	0.29736	0.306234	0.302267	0.274633	0.286669	0.283881	0.25937	0.27065	0.253555	0.113468	0.134583	0.122931	0.216774	0.215288	0.159405
CBLB	0.186475	0.182165	0.18585	0.225521	0.235132	0.222371	0.37908	0.395546	0.384782	-1.26195	-1.26195	-0.767953	-1.26194	-1.26193	-1.26189	-1.26195	-0.029993	0.0398996	0.0295735	0.207563	-1.26191
CBLIF	-1.26197	-1.26197	-1.26197	-1.262	-1.262	-1.262	-0.681247	-0.249234	-0.660986	NA	NA	NA	NA	NA	NA	NA	NA	NA	NA	NA	NA
CBLL1	0.22388	0.223442	0.219092	0.196878	0.197088	0.196114	0.207119	0.211389	0.203147	0.03122	0.0406582	-1.26195	0.119456	0.0864681	0.0942606	0.0241138	0.075809	-0.059604	-1.26192	-0.0393748	-1.26191
CBR1	0.938324	0.932932	0.929502	0.46608	0.451836	0.454169	0.626884	0.649391	0.660172	0.517775	0.544634	0.532593	0.509291	0.475853	0.494597	0.446847	0.515982	0.501893	0.58917	0.539705	0.503074
CBR3	-0.0419768	-0.0500683	-0.0372075	-0.0135057	-0.0114602	-0.0119081	-1.26191	-1.26192	-1.26192	0.288963	0.304265	0.303688	0.30471	0.307933	0.287673	0.23498	0.266546	0.260637	0.136774	0.0725848	0.0906123
CBR4	0.352793	0.337419	0.327235	0.283351	0.28377	0.2785	0.0666514	0.0688085	0.0777227	0.224153	0.23498	0.208496	0.231912	0.195563	0.213404	0.238935	0.0442779	0.19178	0.192838	-1.26189	0.131882
CBWD5	0.0927508	0.099485	0.0964599	0.275416	0.273694	0.277523	0.254854	0.261616	0.262606	NA	NA	NA	NA	NA	NA	NA	NA	NA	NA	NA	NA
CBX1	0.680567	0.77351	0.736456	0.507346	0.517704	0.507346	0.637671	0.61869	0.611733	0.275618	0.28789	0.28778	0.31772	0.291583	0.256423	0.25948	0.251261	0.244752	0.0586497	0.0709049	-0.0500767
CBX2	-1.26197	-1.26197	-1.26197	-1.26197	-1.26197	-1.26197	-1.26198	-1.26198	-1.26198	NA	NA	NA	NA	NA	NA	NA	NA	NA	NA	NA	NA
CBX3	2.23134	2.47465	2.18925	1.78349	1.7653	1.63896	1.73148	1.83146	1.78349	0.526457	0.543351	0.553884	0.627866	0.58917	0.587292	0.536633	0.588428	0.546319	0.462796	0.452961	0.475853
CBX4	0.105788	0.104152	0.0972245	0.150654	0.14792	0.147971	0.101024	0.090173	0.0931945	NA	NA	NA	NA	NA	NA	NA	NA	NA	NA	NA	NA
CBX5	0.604961	0.6005	0.590501	0.501855	0.478783	0.512584	0.414146	0.392058	0.389563	0.377098	0.371968	0.378309	0.361027	0.343441	0.373719	0.328618	0.399655	0.350144	0.283407	0.260784	0.259903
CBX6	0.11263	-1.26197	-1.26197	-0.669644	-0.858767	-0.871257	-1.26185	-1.26185	-1.26184	NA	NA	NA	NA	NA	NA	NA	NA	NA	NA	NA	NA
CBX7	0.0845866	0.107495	0.112228	-1.262	-1.262	-1.262	-1.26198	-1.26198	-1.26198	NA	NA	NA	NA	NA	NA	NA	NA	NA	NA	NA	NA
CBX8	0.260759	0.254117	0.260514	0.0895249	0.100313	0.0945849	0.162499	0.162835	0.165598	NA	NA	NA	NA	NA	NA	NA	NA	NA	NA	NA	NA
CC2D1A	0.170294	0.166214	0.172914	0.0920273	0.0950936	0.0909064	0.173007	0.172774	0.175946	0.176646	0.042574	0.115515	-1.26194	0.00474097	-1.26189	0.0185328	-0.0319129	0.0770521	0.129879	0.139102	0.114779
CC2D1B	0.350908	0.339728	0.346081	0.31437	0.303231	0.308668	0.293234	0.285468	0.281041	0.218517	0.196305	0.20247	0.206408	0.211298	0.185814	0.266189	0.234389	0.227748	0.0144442	0.157094	0.00661797
CCAR1	0.37237	0.360757	0.361082	0.326457	0.328552	0.327861	0.329237	0.31682	0.312412	0.39425	0.397329	0.406146	0.411695	0.391228	0.382354	0.377493	0.414985	0.47098	0.357803	0.344299	0.351528
CCAR2	0.42712	0.410462	0.411486	0.372909	0.36907	0.369932	0.365805	0.363454	0.358151	0.501893	0.511049	0.522995	0.510595	0.557533	0.538443	0.535458	0.568172	0.583497	0.492182	0.46244	0.481242
CCBL1	0.22302	0.222289	0.227253	-1.26192	-1.26194	-1.26194	0.0836609	0.0846594	0.0915113	NA	NA	NA	NA	NA	NA	NA	NA	NA	NA	NA	NA
CCBL2	0.16829	0.165848	0.161069	0.0675754	0.0689519	0.0620346	0.121988	0.115029	0.11821	NA	NA	NA	NA	NA	NA	NA	NA	NA	NA	NA	NA
CCDC101	0.221525	0.227184	0.233229	0.102004	0.106353	0.10192	0.170778	0.165598	0.153993	NA	NA	NA	NA	NA	NA	NA	NA	NA	NA	NA	NA
CCDC102A	-0.462077	-0.652209	-0.651595	0.0386879	0.0442342	0.0418189	-1.26198	-1.26198	-1.26198	NA	NA	NA	NA	NA	NA	NA	NA	NA	NA	NA	NA
CCDC109B	0.0325478	0.0288805	0.019254	0.118525	0.109627	0.111147	-0.643541	-0.452335	-0.648894	NA	NA	NA	NA	NA	NA	NA	NA	NA	NA	NA	NA
CCDC115	0.0075514	0.062777	0.0766858	0.11192	0.114892	0.110116	0.0215914	0.0290661	0.00470387	-1.26195	-0.0180345	0.0377334	-0.0193118	-1.26193	-1.26189	-0.642542	-1.26193	-0.462026	0.0754887	-1.26189	-1.26191
CCDC117	0.0168338	0.0837323	0.134007	0.14546	0.141798	0.139861	0.137692	0.158777	0.138125	NA	NA	NA	NA	NA	NA	NA	NA	NA	NA	NA	NA
CCDC12	0.429087	0.471542	0.484515	0.446312	0.454843	0.437841	0.45005	0.444841	0.444277	0.108169	0.0481828	0.179596	0.156987	0.0782079	0.0379022	-0.0191002	0.0779634	0.24116	0.221786	0.165509	0.161253
CCDC124	0.378449	0.38607	0.385882	0.512926	0.531809	0.522273	0.454843	0.444647	0.451349	0.109858	0.114416	0.142369	0.143678	0.109681	0.101873	0.274937	0.218595	0.21368	0.213546	0.230235	0.159082
CCDC126	-0.461274	-0.358166	-0.245783	-0.461274	-0.351286	-0.447197	0.127892	0.139628	0.125288	NA	NA	NA	NA	NA	NA	NA	NA	NA	NA	NA	NA
CCDC127	0.248307	0.246469	0.255747	0.20086	0.202287	0.201029	0.249352	0.285129	0.282046	0.00520209	-1.26195	-0.0482165	0.0488823	-0.465172	-1.26189	-1.26195	-1.26193	-1.26194	-1.26192	-1.26189	-1.26191
CCDC130	0.103498	0.112385	0.103425	0.0356585	0.0466213	0.0332577	0.0370991	0.0336777	0.0383239	NA	NA	NA	NA	NA	NA	NA	NA	NA	NA	NA	NA
CCDC132	0.117248	0.116546	0.121692	0.0504472	0.0538934	0.0480751	0.0726053	0.0676721	0.0735225	NA	NA	NA	NA	NA	NA	NA	NA	NA	NA	NA	NA
CCDC134	0.234824	0.229337	0.238823	0.132636	0.142044	0.135235	0.21641	0.202172	0.192232	-0.24175	-1.26195	-1.26195	-1.26194	-0.148998	-1.26189	-1.26195	-1.26193	-1.26194	0.0831093	0.0517656	0.0482945
CCDC137	0.229695	0.234671	0.233028	0.245215	0.237383	0.237962	0.252593	0.252265	0.249664	-0.0270021	0.0104652	-0.0487805	-0.65724	0.00505341	-1.26189	0.00971662	0.122833	0.113925	0.15668	0.0961191	0.167035
CCDC15	0.0487453	0.063399	0.0536636	-1.26192	-1.26191	-1.26192	-0.962239	-1.06629	-1.26183	NA	NA	NA	NA	NA	NA	NA	NA	NA	NA	NA	NA
CCDC151	-1.26197	-1.26197	-1.26197	0.149007	0.133554	0.139513	-1.26198	-1.26198	-1.26198	NA	NA	NA	NA	NA	NA	NA	NA	NA	NA	NA	NA
CCDC167	0.133554	0.137611	0.133273	0.272039	0.286855	0.270083	0.122443	0.126848	0.120677	NA	NA	NA	NA	NA	NA	NA	NA	NA	NA	NA	NA
CCDC174	0.13483	0.131618	0.139336	0.0229932	0.0432358	0.0263375	0.191418	0.179654	0.170132	NA	NA	NA	NA	NA	NA	NA	NA	NA	NA	NA	NA
CCDC18	-1.26189	-1.26189	-1.26189	-1.26199	-1.26199	-1.26199	-1.26198	-1.26198	-1.26198	NA	NA	NA	NA	NA	NA	NA	NA	NA	NA	NA	NA
CCDC186	-0.266676	-0.34879	-0.261543	-0.0484122	-0.0419768	-0.0362162	-1.26186	-1.26186	-1.26185	0.0508441	-1.26195	-1.26195	-0.258524	0.019343	-1.26189	0.0751654	0.155373	-0.35547	-1.26192	-1.26189	-1.26191
CCDC22	0.276195	0.269793	0.272882	0.199324	0.208896	0.200586	0.233174	0.23238	0.225221	0.199925	0.215938	0.219773	0.178878	0.182201	0.144021	0.18064	0.16795	0.211159	0.152245	0.107784	0.183012
CCDC25	0.365122	0.362168	0.360757	0.307901	0.284752	0.30424	0.288904	0.268534	0.285766	0.176034	0.190826	0.200831	0.194818	0.148116	0.169901	0.135579	0.165616	0.109614	0.0691608	0.138465	0.120744
CCDC27	-1.26197	-1.26197	-1.26197	-1.262	-1.262	-1.262	-0.258972	-0.250099	-0.240792	NA	NA	NA	NA	NA	NA	NA	NA	NA	NA	NA	NA
CCDC28A	0.0915113	0.108606	0.111178	-0.240365	-0.150224	-0.0737772	-1.26198	-1.26198	-1.26198	-0.159607	-0.241511	-0.0583453	-1.26194	-1.26193	-1.26189	-1.26195	-1.26193	-1.26194	-1.26192	-1.26189	-1.26191
CCDC43	0.364468	0.358025	0.366063	0.273247	0.277523	0.267865	0.360963	0.345692	0.348336	-1.26195	-0.0211056	-1.26195	-0.00307522	-1.26193	-1.26189	-0.679497	-1.26193	0.0946482	0.0492132	0.107698	0.021691
CCDC47	0.372059	0.371931	0.364468	0.377147	0.376176	0.375493	0.441477	0.432039	0.430648	0.204454	0.203792	0.185814	0.0357542	0.0954907	0.158187	0.232972	0.244752	0.206408	0.248381	0.240388	0.268695
CCDC50	0.0925602	0.0961644	0.112778	0.159627	0.184975	0.164128	0.408413	0.397455	0.414709	NA	NA	NA	NA	NA	NA	NA	NA	NA	NA	NA	NA
CCDC51	0.252657	0.256028	0.253274	0.248574	0.254357	0.251625	0.220961	0.233174	0.23044	-1.26195	-1.26195	-1.26195	-1.26194	-0.239509	-1.26189	-0.861402	-1.26193	-0.453956	0.0641786	0.038555	0.0563664
CCDC53	-1.26197	-1.26197	-1.26197	0.162886	0.162933	0.158141	0.193017	0.173257	0.178732	NA	NA	NA	NA	NA	NA	NA	NA	NA	NA	NA	NA
CCDC58	-1.26197	0.100166	-1.26197	0.170913	0.159004	0.156273	0.11479	0.170294	0.132713	0.232446	0.273374	0.26681	0.112111	0.150895	0.114175	0.208361	0.199192	0.205356	0.226839	0.244478	0.255988
CCDC59	0.238044	0.230752	0.22127	0.213556	0.231011	0.218555	0.290573	0.289387	0.280363	-0.767333	-0.665664	0.00277897	-0.000410329	0.0919368	0.0343218	-0.353426	-0.0343344	-0.35312	-0.036994	0.0822129	0.0314861
CCDC6	0.218773	0.224867	0.224949	0.350367	0.355759	0.350605	0.258474	0.258326	0.263513	0.0716932	0.0412011	0.0770521	0.0543203	0.0563664	0.0992753	0.203664	0.170848	0.17512	0.246392	0.219918	0.177703
CCDC61	0.0621476	0.0577405	0.0543729	0.0188024	0.0160871	0.0160871	0.050312	0.051896	0.0607333	-1.26195	-1.26195	-1.26195	-1.26194	-1.26193	-1.26189	-0.376958	-1.26193	-1.26194	-0.359041	-1.26189	-1.26191
CCDC64	-0.861834	-0.671895	-0.655404	-0.253947	-0.257837	-0.25464	-1.26198	-1.26198	-1.26198	NA	NA	NA	NA	NA	NA	NA	NA	NA	NA	NA	NA
CCDC66	-1.26197	-1.26197	-1.26197	-1.262	-1.262	-1.262	-1.26186	-1.26186	-1.26186	NA	NA	NA	NA	NA	NA	NA	NA	NA	NA	NA	NA
CCDC69	0.189599	0.206126	0.220383	0.144813	0.142223	0.134617	-0.348926	-0.0936605	-0.0333323	NA	NA	NA	NA	NA	NA	NA	NA	NA	NA	NA	NA
CCDC71	0.118576	0.138609	0.0983272	-0.645496	-0.453751	-0.643643	-0.462279	-0.26035	-0.252853	NA	NA	NA	NA	NA	NA	NA	NA	NA	NA	NA	NA
CCDC71L	0.133185	0.133126	0.12215	0.124187	0.127959	0.129714	0.00435776	-0.00797977	0.0084445	NA	NA	NA	NA	NA	NA	NA	NA	NA	NA	NA	NA
CCDC77	-0.0409522	-0.0421586	-0.040355	-1.26194	-1.26194	-1.26194	-0.349299	-0.242188	-0.0621581	NA	NA	NA	NA	NA	NA	NA	NA	NA	NA	NA	NA
CCDC82	0.0198835	0.0401598	0.0232855	-0.0571059	-0.1523	-0.254388	0.0331065	0.0374323	0.0611074	NA	NA	NA	NA	NA	NA	NA	NA	NA	NA	NA	NA
CCDC84	0.0057725	0.00512001	0.00871719	-1.26189	-1.2619	-1.2619	-0.0607326	-0.357168	-0.25217	NA	NA	NA	NA	NA	NA	NA	NA	NA	NA	NA	NA
CCDC85C	0.0288805	0.018337	0.0165387	-0.863276	-0.562767	-0.669265	0.0859251	0.145691	0.138537	NA	NA	NA	NA	NA	NA	NA	NA	NA	NA	NA	NA
CCDC86	0.229966	0.226375	0.218847	0.238362	0.23023	0.235519	0.349405	0.33523	0.3224	0.17512	0.233274	0.159943	0.185142	0.0760803	0.0560661	0.276355	0.260521	0.248718	0.307144	0.278786	0.248498
CCDC88A	0.127427	0.131682	0.133015	0.043164	0.0389156	0.0451003	-0.210148	-1.26184	-0.0364539	NA	NA	NA	NA	NA	NA	NA	NA	NA	NA	NA	NA
CCDC88B	0.339848	0.328352	0.330356	0.403257	0.411486	0.404881	0.308893	0.310026	0.310026	0.138574	0.132916	0.140726	0.146609	0.0678575	0.0778044	0.166837	0.158743	0.0842947	0.131191	0.128095	0.176034
CCDC88C	0.110215	0.106827	0.111354	0.0710695	0.0704155	0.0681506	0.0626209	0.0611074	0.0584516	NA	NA	NA	NA	NA	NA	NA	NA	NA	NA	NA	NA
CCDC9	0.31682	0.333863	0.341766	0.209484	0.20862	0.209139	0.255138	0.259759	0.256828	-1.26195	-1.26195	0.0469998	0.0944137	0.0446241	-1.26189	0.0447658	0.0352712	-0.049176	-0.00383609	0.118226	-0.0235171
CCDC90B	-0.350187	-0.246688	-0.0463546	0.183222	0.177367	0.174944	-1.26198	-1.26198	-1.26198	-0.256464	0.144021	-0.0547994	-0.0345768	-0.557542	0.155923	-1.26195	-1.26193	-1.26194	-1.26192	-1.26189	-1.26191
CCDC91	-1.26197	-1.26197	-1.26197	-0.668575	-0.648087	-0.663791	-0.247529	-0.0463546	-0.0314758	0.0691608	0.0543967	0.0381124	-0.035313	0.0224068	-1.26189	-1.26195	0.0117205	0.0631094	0.0490046	-1.26189	-1.26191
CCDC92	0.0334996	0.0459748	0.0392701	0.07948	0.0607333	0.0741649	-0.0388898	-0.033814	-0.0319321	NA	NA	NA	NA	NA	NA	NA	NA	NA	NA	NA	NA
CCDC93	0.312412	0.30736	0.312346	0.196114	0.196676	0.191361	0.160849	0.156179	0.15427	0.19586	0.224153	0.168619	0.192838	0.129181	0.167343	0.122317	0.104481	0.0676413	-1.26192	-1.26189	0.257137
CCDC94	0.213465	0.209139	0.212087	0.163494	0.151017	0.156676	0.247739	0.239117	0.234743	NA	NA	NA	NA	NA	NA	NA	NA	NA	NA	NA	NA
CCDC97	-0.0643703	-0.0253632	-0.0277374	0.18047	0.179717	0.172835	0.250703	0.256473	0.241327	0.0942606	-1.26195	-1.26195	0.0302696	0.0215775	0.111519	0.123394	-0.0307933	-0.243437	-1.26192	-1.26189	0.0179377
CCHCR1	-1.26187	-1.26187	-1.26187	-0.649408	-0.655126	-0.654999	-0.657771	-0.653966	-0.657771	NA	NA	NA	NA	NA	NA	NA	NA	NA	NA	NA	NA
CCL21	0.345405	0.357879	0.336291	-1.262	-1.262	-1.262	-1.26198	-1.26198	-1.26198	NA	NA	NA	NA	NA	NA	NA	NA	NA	NA	NA	NA
CCM2	0.403939	0.407195	0.407819	0.240964	0.212245	0.227429	0.251031	0.250305	0.266576	0.166712	0.173751	0.157635	-0.00862765	0.0488823	-1.26189	-0.148998	-0.45419	-1.26194	-1.26192	-1.26189	-1.26191
CCNA2	-1.26197	-1.26197	-1.26197	0.249352	0.249021	0.258379	0.313228	0.296877	0.310262	-1.26195	-1.26195	-1.26195	-1.26194	-1.26193	-1.26189	0.0766797	-1.26193	-0.028373	0.0877564	-1.26189	0.126185
CCNB1	-1.26197	-1.26197	-1.26197	0.323049	0.31664	0.320964	-0.966898	-1.26188	-1.26185	-1.26195	-1.26195	-1.26195	-1.26194	-1.26193	-1.26189	0.117025	0.0789417	0.025524	0.0836457	0.094001	0.0303887
CCNB2	-1.26197	-1.26197	-1.26197	0.195296	0.197573	0.202791	-1.26198	-1.26198	-1.26198	NA	NA	NA	NA	NA	NA	NA	NA	NA	NA	NA	NA
CCNC	0.101445	0.108155	0.121013	-0.0349538	-0.0188846	-0.0414351	0.0862705	0.0791183	0.0852111	NA	NA	NA	NA	NA	NA	NA	NA	NA	NA	NA	NA
CCND2	0.0409183	0.0554133	0.0475	0.164845	0.172358	0.168829	0.105955	0.115282	0.13909	NA	NA	NA	NA	NA	NA	NA	NA	NA	NA	NA	NA
CCND3	-1.26197	-1.26197	-1.26197	0.272777	0.247006	0.266956	-1.26187	-1.26186	-1.26187	NA	NA	NA	NA	NA	NA	NA	NA	NA	NA	NA	NA
CCNDBP1	-1.26197	-1.26197	-1.26197	-0.352685	-0.243353	-0.365177	0.00337084	-0.00663206	-0.00983047	NA	NA	NA	NA	NA	NA	NA	NA	NA	NA	NA	NA
CCNE1	-1.26187	-1.26187	-1.26187	0.0194567	0.0316569	0.0214917	-0.256747	-0.454963	-0.263904	NA	NA	NA	NA	NA	NA	NA	NA	NA	NA	NA	NA
CCNE2	-1.26197	-1.26197	-1.26197	-0.44766	-0.453586	-0.450246	-1.26198	-1.26198	-1.26198	NA	NA	NA	NA	NA	NA	NA	NA	NA	NA	NA	NA
CCNG1	0.051187	0.0395989	0.0461025	-0.00688328	0.00071119	-0.0128338	-1.26198	-1.26198	-1.26198	NA	NA	NA	NA	NA	NA	NA	NA	NA	NA	NA	NA
CCNH	0.288487	0.284276	0.287718	0.234468	0.233174	0.232684	0.270963	0.26611	0.261263	-0.00346693	0.0884219	0.0484877	0.147532	-0.0289777	0.0490046	0.0508441	-0.356772	-0.652975	0.0432103	-1.26189	0.00606993
CCNK	0.290464	0.290247	0.292527	0.190782	0.194224	0.18598	0.204685	0.201772	0.196114	0.215938	0.172388	0.152465	0.181675	0.133885	0.159283	0.142628	0.209997	0.210722	0.0379022	0.0610572	0.098479
CCNL1	0.122898	0.115886	0.127832	0.0298487	0.0354424	0.0269395	0.117248	0.100844	0.0951688	-0.0334434	0.0291305	-1.26195	-0.0153417	0.0168184	0.0359092	0.0290324	-0.251259	-0.0422744	0.073959	0.0577572	0.0526871
CCNL2	0.160004	0.154605	0.139206	0.109411	0.111283	0.114251	0.144186	0.122514	0.117032	-1.26195	-1.26195	-1.26195	-1.26194	-1.26193	-1.26189	-0.350048	-0.0148107	-0.0339168	-1.26192	-1.26189	-0.0023189
CCNQ	0.0571727	0.0505112	0.0630783	-1.26194	-1.26194	-1.26193	-0.659452	-0.857465	-0.682869	NA	NA	NA	NA	NA	NA	NA	NA	NA	NA	NA	NA
CCNT1	0.200303	0.198372	0.197088	0.242307	0.237484	0.23971	0.256572	0.247686	0.251309	-0.0660236	-0.862432	-0.243437	0.0719973	-0.249384	0.0123833	0.036836	0.0122458	0.120872	0.036645	-0.0465297	0.0517656
CCNT2	0.170968	0.169291	0.163803	-0.153144	-0.0270604	-0.210148	-0.962897	-0.668386	-0.859255	NA	NA	NA	NA	NA	NA	NA	NA	NA	NA	NA	NA
CCNY	0.240817	0.234047	0.230293	0.0285749	0.0384915	0.0321607	0.121783	0.142103	0.15153	0.0969065	0.0596059	0.0335992	-0.0483974	0.0895112	0.0598791	-1.26195	-1.26193	-1.26194	-1.26192	-1.26189	-1.26191
CCP110	-0.241974	-0.56472	-0.765358	-0.652912	-0.656973	-0.64785	0.0102422	0.00470387	-0.00169754	NA	NA	NA	NA	NA	NA	NA	NA	NA	NA	NA	NA
CCR2	-1.26197	-1.26197	-1.26197	0.0211249	0.0198835	0.0229026	-1.26198	-1.26198	-1.26198	NA	NA	NA	NA	NA	NA	NA	NA	NA	NA	NA	NA
CCR4	-1.26197	-1.26197	-1.26197	-1.26188	-1.26191	-1.2619	-1.26198	-1.26198	-1.26198	NA	NA	NA	NA	NA	NA	NA	NA	NA	NA	NA	NA
CCR5	-1.26197	-1.26197	-1.26197	0.284359	0.318361	0.310838	-1.26198	-1.26198	-1.26198	NA	NA	NA	NA	NA	NA	NA	NA	NA	NA	NA	NA
CCR7	0.325364	0.323779	0.31903	-0.154617	-0.16416	-0.456512	0.523724	0.542766	0.520076	0.147656	0.174948	0.131191	0.0481828	0.0719347	0.173352	0.0601291	0.00474097	-0.25325	0.139102	0.188228	0.118124
CCRN4L	-0.239409	-0.242919	-0.246515	0.0232095	0.00624007	0.0163592	0.104828	0.110868	0.106453	NA	NA	NA	NA	NA	NA	NA	NA	NA	NA	NA	NA
CCS	0.23971	0.255903	0.243775	0.336153	0.346879	0.340673	0.260076	0.267705	0.296775	0.213546	0.236078	0.245423	0.28778	0.259252	0.269791	0.148325	0.172769	0.146512	0.103757	0.18498	0.154507
CCSAP	0.150452	0.155366	0.15274	0.0307531	0.0136311	0.0176299	-0.861459	-1.16448	-1.23415	NA	NA	NA	NA	NA	NA	NA	NA	NA	NA	NA	NA
CCSER2	0.0618451	0.0599018	0.0576611	-0.252427	-0.446483	-0.446712	-0.962641	-0.959789	-1.06488	NA	NA	NA	NA	NA	NA	NA	NA	NA	NA	NA	NA
CCT2	0.90747	0.864203	0.855631	0.872585	0.846558	0.864203	1.06547	1.04585	1.09227	0.796538	0.790379	0.790379	0.77118	0.730545	0.647017	1.10373	1.07084	1.04051	1.09075	1.21708	1.186
CCT3	0.742114	0.701499	0.709408	0.775207	0.762508	0.783598	0.824608	0.807248	0.823371	0.860672	0.821545	0.815558	0.839376	0.744363	0.727977	0.925831	1.08345	1.14515	1.06357	0.969988	0.999697
CCT4	0.995863	0.94154	0.975992	0.878033	0.889092	0.866101	1.14256	1.16301	1.17423	0.690867	0.670863	0.67797	0.581575	0.627059	0.636322	0.94781	0.962154	0.989888	0.983058	0.944062	0.995151
CCT5	0.699341	0.684651	0.693215	0.689967	0.67039	0.683452	0.723386	0.718164	0.748847	0.706533	0.701794	0.737705	0.685652	0.627866	0.633951	0.870962	1.24419	1.19251	0.832494	0.737705	0.80004
CCT6A	0.915773	0.878033	0.885781	0.688983	0.660932	0.675672	0.665539	0.665539	0.690807	0.670863	0.680836	0.651117	0.675042	0.638235	0.640573	0.821545	0.825666	0.76913	0.804176	0.892205	0.744363
CCT6B	-1.26197	-1.26197	-1.26197	0.0196133	0.0404993	0.039714	-0.858364	-0.858767	-0.668575	NA	NA	NA	NA	NA	NA	NA	NA	NA	NA	NA	NA
CCT7	0.701499	0.682448	0.676761	0.671224	0.669587	0.671224	0.775207	0.782145	0.786326	0.555501	0.568172	0.624655	0.566985	0.562548	0.556974	0.714717	0.690867	0.663546	0.753952	0.806372	0.821545
CCT8	0.797924	0.764063	0.797924	0.789063	0.745351	0.775207	0.998653	0.946756	1.0319	0.751065	0.705266	0.765032	0.732254	0.765032	0.723656	0.999697	0.952333	0.879696	1.07084	1.186	1.10373
CCZ1	0.217191	0.213465	0.227682	0.215934	0.224006	0.217539	0.220102	0.227253	0.222289	NA	NA	NA	NA	NA	NA	NA	NA	NA	NA	NA	NA
CD180	-0.458229	-0.857465	-0.871257	-1.262	-1.262	-1.262	0.03638	-0.0177383	0.0191568	NA	NA	NA	NA	NA	NA	NA	NA	NA	NA	NA	NA
CD1D	0.211995	0.215574	0.213098	-0.671069	-0.661748	-0.672855	-0.0260739	-0.154617	-0.155814	NA	NA	NA	NA	NA	NA	NA	NA	NA	NA	NA	NA
CD2	0.273343	0.264573	0.252177	0.433564	0.413048	0.421438	0.384917	0.364381	0.356948	0.329211	0.292212	0.319665	0.368398	0.346457	0.351041	0.356099	0.386695	0.344799	0.338767	0.350762	0.35494
CD200	-0.00235878	-0.0186506	-0.0319321	-1.262	-1.262	-1.262	0.0739832	0.0510681	0.0714655	NA	NA	NA	NA	NA	NA	NA	NA	NA	NA	NA	NA
CD209	-0.654698	-0.468663	-0.65971	-1.262	-1.262	-1.262	0.118465	0.0393578	0.0876275	NA	NA	NA	NA	NA	NA	NA	NA	NA	NA	NA	NA
CD22	-0.249429	-0.239409	-0.469702	0.00253209	-0.0234913	-0.0135057	0.159417	0.124977	0.157983	NA	NA	NA	NA	NA	NA	NA	NA	NA	NA	NA	NA
CD226	0.0390605	0.0441365	0.0263375	0.135146	0.128712	0.125233	0.00644091	0.0184082	0.039714	-1.26195	-1.26195	-0.0732319	-0.457841	-1.26193	0.0305545	0.0876501	0.0716932	0.0358178	0.146512	0.155447	0.203174
CD247	0.676761	0.730812	0.764063	0.66402	0.653413	0.663225	0.516592	0.548137	0.5285	0.457087	0.475352	0.471808	0.422969	0.417135	0.423211	0.256838	0.240758	0.234269	0.258926	0.28789	0.261752
CD27	-0.243255	-0.0366013	-0.0536562	-0.24788	-0.0512126	-0.26216	0.034096	0.0508738	-0.000125366	0.156411	0.161634	0.181499	0.113823	0.170719	0.209766	-0.0103163	-0.0260745	-0.254835	-0.029829	0.0470954	-0.0240077
CD274	-1.26197	-1.26197	-1.26197	0.0666514	0.085642	0.0759586	0.224221	0.204437	0.217073	NA	NA	NA	NA	NA	NA	NA	NA	NA	NA	NA	NA
CD28	0.202224	0.202043	0.177367	0.363454	0.363454	0.36685	0.321485	0.302777	0.307451	0.122212	0.140352	0.114779	-0.00023962	0.17672	0.142085	-0.0211056	-0.0161205	0.0877564	-0.0558366	0.0334502	0.0117205
CD2AP	0.327366	0.318896	0.320351	0.181006	0.15427	0.17523	0.291695	0.28764	0.289929	0.296152	0.327106	0.315573	0.340446	0.326197	0.32831	0.337145	0.362757	0.361805	0.340248	0.25948	0.293277
CD2BP2	0.0694547	0.0958627	0.0968636	0.340228	0.343541	0.336666	0.39238	0.384283	0.37277	0.193337	0.158521	0.152174	0.180543	0.185814	0.18351	0.140455	0.205829	0.217598	0.154117	0.181793	0.185381
CD36	-0.23925	-0.858364	-0.959447	-1.26195	-1.26193	-1.26194	0.0560338	-0.255691	0.00996277	NA	NA	NA	NA	NA	NA	NA	NA	NA	NA	NA	NA
CD37	0.229518	0.23341	0.225313	0.281617	0.294526	0.279899	0.245685	0.218116	0.22577	-0.040698	0.0714659	0.0687953	0.0752529	0.0946482	0.112231	0.0493526	0.0975344	0.0347612	-0.0211056	-1.26189	-0.151633
CD38	-0.258132	-0.363942	-0.249234	0.0693813	0.100758	0.106028	0.230685	0.205087	0.230521	-0.254835	-0.659851	-0.150016	0.0294456	0.0439607	0.0912032	0.00867689	0.133329	0.0830127	0.0298239	-0.017486	0.0780471
CD3D	0.655907	0.664627	0.687504	0.415162	0.414709	0.409875	0.495002	0.467422	0.461398	0.355115	0.344799	0.361027	0.310856	0.358226	0.364752	0.25286	0.271914	0.237197	0.302789	0.270281	0.26519
CD3E	0.61869	0.628611	0.636215	0.534321	0.55856	0.528176	0.567758	0.536671	0.526669	0.451878	0.439755	0.461729	0.461424	0.462145	0.434099	0.376245	0.380115	0.368061	0.288051	0.304444	0.3135
CD3EAP	0.306391	0.312753	0.311407	0.255529	0.26044	0.257627	0.361837	0.355378	0.362046	0.0490976	0.107623	0.115893	0.127169	0.119233	0.148619	0.152571	0.183635	0.220809	0.187609	0.210986	0.223703
CD3G	0.470259	0.48713	0.490152	0.439183	0.407046	0.426392	0.204536	0.213372	0.184504	0.279329	0.240285	0.282202	0.196305	0.273228	0.296039	-0.452811	0.113569	0.00215514	-0.250054	0.0135602	-1.26191
CD4	0.480263	0.484768	0.456923	0.416885	0.427445	0.425047	0.425494	0.421104	0.422171	0.32996	0.311228	0.315322	0.351218	0.344126	0.369791	0.270884	0.293342	0.308311	0.2313	0.235994	0.233721
CD40	-1.26197	-1.26197	-1.26197	-1.262	-1.262	-1.262	0.131164	0.0902354	0.120333	NA	NA	NA	NA	NA	NA	NA	NA	NA	NA	NA	NA
CD40LG	-0.029924	-0.040355	-0.0483007	-1.2619	-1.26193	-1.26191	0.0201444	0.0469901	0.040983	-1.26195	-1.26195	-1.26195	-1.26194	-1.26193	-1.26189	0.112878	0.0651326	0.0108857	0.119588	0.122028	0.123394
CD44	0.204898	0.190411	0.179781	0.244758	0.224297	0.227523	0.406375	0.382841	0.385405	0.360847	0.38539	0.370474	0.41682	0.444164	0.401636	0.357317	0.343214	0.329211	0.344601	0.35201	0.363656
CD47	0.512584	0.50366	0.507087	0.516334	0.507896	0.514948	0.456177	0.450629	0.448053	0.41549	0.331812	0.342306	0.187524	0.293342	0.250762	0.390067	0.334174	0.530208	0.546816	0.404059	0.514761
CD48	0.371716	0.369932	0.360847	0.439326	0.433027	0.443729	0.264441	0.255445	0.270865	0.389402	0.397079	0.379533	0.434966	0.39406	0.406578	0.392946	0.399177	0.405125	0.374794	0.352581	0.372436
CD5	0.553738	0.537331	0.540332	0.424694	0.415815	0.421104	0.569995	0.600097	0.589177	0.499043	0.497601	0.493246	0.579572	0.522995	0.516493	0.356924	0.360703	0.360166	0.332927	0.324371	0.343214
CD55	0.0502	0.0471195	0.0520176	-1.26189	-1.26184	-1.26186	-1.26183	-1.16926	-1.26183	0.214669	0.168769	0.167556	0.288729	0.203473	0.227864	0.187314	0.185613	0.153225	0.070576	0.130786	-0.0285625
CD6	0.368848	0.364583	0.358783	0.246728	0.246903	0.244352	0.325589	0.329498	0.323659	0.420068	0.436121	0.428159	0.462145	0.439002	0.443958	0.368398	0.320409	0.359262	0.303939	0.317312	0.330807
CD69	0.0765635	-1.26197	0.15427	0.142103	0.141873	0.141739	0.675672	0.739178	0.746463	-1.26195	-1.26195	-1.26195	-1.26194	-1.26193	-1.26189	0.038879	0.0586497	-0.040698	-1.26192	-0.0510962	-0.257079
CD72	-0.460988	-0.449047	-0.645224	-1.262	-1.262	-1.262	-0.0936605	-0.253366	-0.0737772	NA	NA	NA	NA	NA	NA	NA	NA	NA	NA	NA	NA
CD74	0.138681	0.137873	0.154061	0.0886548	0.106524	0.0914047	0.175483	0.155128	0.163151	0.115631	0.13586	0.0908767	0.160869	0.117841	0.145708	0.256423	0.292756	0.318521	0.338628	0.315198	0.367593
CD79A	0.0398138	0.00299224	-0.0125918	-1.262	-1.262	-1.262	0.103688	0.075379	0.0780009	NA	NA	NA	NA	NA	NA	NA	NA	NA	NA	NA	NA
CD80	-1.26197	-1.26197	-1.26197	-1.26198	-1.26198	-1.26198	-0.652036	-1.26183	-0.96588	NA	NA	NA	NA	NA	NA	NA	NA	NA	NA	NA	NA
CD81	-0.348282	-1.15057	-1.26197	0.0604582	0.0419992	0.0348234	0.225221	0.220571	0.233278	0.156781	0.200194	0.178319	-0.0293214	-0.248755	0.0886682	0.121661	0.296405	0.311228	0.237551	0.238571	0.279975
CD82	0.315998	0.312063	0.295679	0.274663	0.254194	0.256028	0.406775	0.373765	0.366156	0.075809	0.0769892	0.0808822	-0.457151	0.046656	-1.26189	0.0435689	-1.26193	-0.0270021	0.156546	0.194721	0.177624
CD84	0.283264	0.282526	0.280273	0.262424	0.256655	0.258222	0.187841	0.175053	0.168906	-1.26195	0.0508441	-1.26195	-1.26194	0.0590641	-0.000735989	0.0279831	-1.26193	-1.26194	-1.26192	0.125216	-1.26191
CD8A	-1.26197	-1.26197	-1.26197	-0.644713	-0.678737	-0.65623	-1.26198	-1.26198	-1.26198	NA	NA	NA	NA	NA	NA	NA	NA	NA	NA	NA	NA
CD8B	0.0334145	0.0451751	0.0390605	-0.0555819	-0.022076	-0.450028	0.0353317	0.0216609	-0.0131901	NA	NA	NA	NA	NA	NA	NA	NA	NA	NA	NA	NA
CD9	0.153943	0.142597	0.140687	-0.655802	-0.658935	-0.44766	0.159004	0.118617	0.103559	NA	NA	NA	NA	NA	NA	NA	NA	NA	NA	NA	NA
CD96	-0.351286	-0.150758	-0.0638975	-1.262	-1.262	-1.262	-1.26198	-1.26198	-1.26198	0.237551	0.156317	0.037392	0.0774471	0.141163	-1.26189	-1.26195	-1.26193	-1.26194	-1.26192	-1.26189	-1.26191
CD99	0.106265	0.123361	0.145276	0.0836609	0.0334145	0.0767561	-0.650431	-0.0566818	-0.856778	0.255283	0.278786	0.264346	0.206217	0.336221	0.300515	0.0664615	0.0930468	0.0327264	0.171207	0.183983	0.150895
CDADC1	-0.0679428	-0.0672698	-0.0470863	-1.26198	-1.26198	-1.26198	-0.157484	-0.253233	-0.468243	NA	NA	NA	NA	NA	NA	NA	NA	NA	NA	NA	NA
CDAN1	0.0866113	0.0810939	0.0805766	0.131618	0.136344	0.131015	-0.0229207	-0.0314758	-0.0229207	NA	NA	NA	NA	NA	NA	NA	NA	NA	NA	NA	NA
CDC123	0.0295268	0.0369096	0.0361569	0.169965	0.160621	0.167693	0.287718	0.275336	0.275229	-1.26195	-1.26195	-1.26195	-1.26194	-1.26193	-1.26189	0.0409631	0.0118272	-0.446704	0.145406	0.103757	0.13513
CDC16	0.255964	0.248426	0.250057	0.291115	0.284846	0.2873	0.225029	0.219709	0.228961	-0.257079	-0.0317199	-1.26195	-0.163342	-0.0115425	0.0195155	-0.652155	0.0725848	0.070576	0.177848	0.152174	0.153627
CDC20	-1.26197	-1.26197	-1.26197	0.122514	0.119234	0.117878	-1.26191	-1.26192	-1.26192	-1.26195	-1.26195	-1.26195	-1.26194	-1.26193	-1.26189	-0.0291609	-0.0309743	-0.0561961	-0.24446	0.0987242	0.113194
CDC23	0.246781	0.236936	0.241492	0.231382	0.231767	0.233104	0.217137	0.217012	0.213041	0.0883124	-0.649291	0.0584904	-0.0270021	0.0861036	0.0840573	0.0272896	0.0864681	0.00592004	0.0857132	0.117358	0.117576
CDC25B	-1.26197	-1.26197	-1.26197	-1.26187	-1.26187	-1.26186	-1.26198	-1.26198	-1.26198	NA	NA	NA	NA	NA	NA	NA	NA	NA	NA	NA	NA
CDC25C	-1.26197	-1.26197	-1.26197	-1.26192	-1.26193	-1.26192	-1.26198	-1.26198	-1.26198	NA	NA	NA	NA	NA	NA	NA	NA	NA	NA	NA	NA
CDC27	0.0727963	0.0641048	0.0711492	0.111101	0.106128	0.105192	0.127278	0.117653	0.11317	-0.252948	-0.260268	0.0616245	0.00675098	-0.457431	-0.045213	-1.26195	-1.26193	-0.0106937	0.236635	0.204371	0.16956
CDC34	-1.26197	-1.26197	-1.26197	0.257627	0.27071	0.257931	0.317219	0.307627	0.300777	NA	NA	NA	NA	NA	NA	NA	NA	NA	NA	NA	NA
CDC37	0.560655	0.557543	0.553738	0.565041	0.557814	0.560239	0.638064	0.655907	0.648518	0.401799	0.415981	0.429609	0.454996	0.436601	0.461131	0.448953	0.420845	0.41682	0.428486	0.417135	0.436601
CDC37L1	0.0801511	0.0864996	0.0987234	0.0374323	0.0115366	0.0281016	-1.26184	-0.660533	-0.962897	NA	NA	NA	NA	NA	NA	NA	NA	NA	NA	NA	NA
CDC40	0.399412	0.384169	0.384782	0.293047	0.28598	0.287091	0.373886	0.370675	0.359462	0.209442	0.242219	0.220453	0.270088	0.165509	0.216453	0.173352	0.185521	0.156317	0.144901	0.188844	0.223422
CDC42	0.932932	0.901881	0.901881	1.02333	0.962085	1.00522	0.796756	0.756922	0.77351	0.540349	0.534222	0.529175	0.876527	0.66456	0.918338	0.654866	0.727977	0.719273	0.571171	0.636322	0.565429
CDC42BPG	-0.645496	-0.866966	-1.16524	-1.26185	-1.26186	-1.26186	-1.26198	-0.646497	-1.26198	NA	NA	NA	NA	NA	NA	NA	NA	NA	NA	NA	NA
CDC42SE2	0.21173	0.200448	0.243064	0.131101	0.121988	0.133757	-1.26198	-1.26198	-1.26198	0.159757	0.183709	0.181148	0.0876501	0.175238	0.199621	0.131094	0.0220827	0.0733571	0.141977	0.176646	0.199925
CDC45	-1.26197	-1.26197	-1.26197	0.148253	0.136762	0.146512	0.0457613	0.0255157	0.0257629	-1.26195	-1.26195	-1.26195	-1.26194	-1.26193	-1.26189	-0.861634	-1.26193	-1.26194	-1.26192	-1.26189	0.019343
CDC5L	0.469596	0.468813	0.46608	0.388834	0.382657	0.384782	0.469038	0.457496	0.448809	0.37908	0.374373	0.371968	0.425074	0.398744	0.379533	0.448091	0.479541	0.490963	0.404907	0.365312	0.387903
CDC6	-1.26187	-1.26186	-1.26186	-0.670253	-0.668881	-0.671069	-0.353417	-0.646145	-0.667454	NA	NA	NA	NA	NA	NA	NA	NA	NA	NA	NA	NA
CDC7	-1.26188	-1.26188	-1.26188	-0.158688	-0.23925	-0.248218	-1.26185	-1.26185	-1.26186	NA	NA	NA	NA	NA	NA	NA	NA	NA	NA	NA	NA
CDC73	0.341901	0.339332	0.344083	0.304898	0.307537	0.303231	0.374979	0.367225	0.369499	0.0989407	0.11368	0.145226	0.155184	0.179977	0.164505	0.196305	0.206217	0.265054	0.338104	0.319525	0.27376
CDCA2	-1.26197	-1.26197	-1.26197	0.141546	0.142103	0.146374	-0.5674	-0.857082	-0.650782	NA	NA	NA	NA	NA	NA	NA	NA	NA	NA	NA	NA
CDCA3	-1.26197	-1.26197	-1.26197	0.118398	0.126025	0.13688	-1.26198	-1.26198	-1.26198	NA	NA	NA	NA	NA	NA	NA	NA	NA	NA	NA	NA
CDCA4	-1.26197	-1.26197	-1.26197	-0.149142	-0.452099	-0.450565	-1.26184	-0.967658	-1.26189	NA	NA	NA	NA	NA	NA	NA	NA	NA	NA	NA	NA
CDCA5	-1.26197	-1.26197	-1.26197	0.201772	0.207797	0.198053	-0.0201842	-0.557776	-0.456018	-1.26195	-1.26195	-1.26195	-1.26194	-1.26193	-1.26189	-1.26195	-1.26193	-1.26194	-1.26192	-1.26189	-0.0336666
CDCA7	-1.16926	-1.26184	-0.972011	0.138972	0.124834	0.127499	0.273949	0.250521	0.217241	NA	NA	NA	NA	NA	NA	NA	NA	NA	NA	NA	NA
CDCA7L	0.212392	0.216217	0.217881	0.215297	0.20748	0.206931	0.252265	0.258474	0.250305	NA	NA	NA	NA	NA	NA	NA	NA	NA	NA	NA	NA
CDCA8	-1.26197	-1.26197	-1.26197	0.413048	0.4061	0.409704	-0.0683321	-0.558944	-0.154961	NA	NA	NA	NA	NA	NA	NA	NA	NA	NA	NA	NA
CDH17	-1.26197	-1.26197	-1.26197	-1.262	-1.262	-1.262	-1.2619	-1.26189	-1.2619	NA	NA	NA	NA	NA	NA	NA	NA	NA	NA	NA	NA
CDIPT	0.371249	0.358783	0.363934	0.427959	0.449709	0.430441	0.261759	0.253166	0.240086	0.106441	-1.26195	0.127574	0.244895	0.166498	0.224153	0.0967892	-1.26193	0.101873	0.232826	0.21724	0.166712
CDK1	0.0184829	0.0121947	0.00413964	0.600097	0.571808	0.592372	0.313326	0.296049	0.302157	-0.766558	-1.26195	-1.26195	-1.26194	-1.26193	-1.26189	0.287067	0.303688	0.272953	0.287067	0.242572	0.344126
CDK10	0.0220431	0.0315686	0.0264333	-0.242679	-0.557358	-0.272819	0.000824615	0.00269397	0.0137388	NA	NA	NA	NA	NA	NA	NA	NA	NA	NA	NA	NA
CDK11A	0.350502	0.343466	0.339083	0.296123	0.292704	0.297862	0.316998	0.31437	0.31903	NA	NA	NA	NA	NA	NA	NA	NA	NA	NA	NA	NA
CDK12	0.102004	0.0996068	0.0911385	0.0755793	0.0686364	0.0590231	0.0872875	0.0782638	0.0697101	-1.26195	0.0584904	0.0165138	-0.465579	0.0350234	0.104813	0.18706	0.093532	0.0127267	0.14174	0.189792	0.174495
CDK13	0.176866	0.164259	0.158487	0.124759	0.133185	0.127349	0.138034	0.133554	0.14383	0.0427081	0.0458285	0.0398996	-1.26194	-1.26193	-1.26189	-1.26195	-1.26193	-1.26194	-1.26192	-1.26189	-1.26191
CDK17	0.199728	0.194481	0.18747	0.216469	0.214166	0.222854	0.222468	0.231704	0.2367	NA	NA	NA	NA	NA	NA	NA	NA	NA	NA	NA	NA
CDK19	0.20212	0.199208	0.194671	0.156273	0.173381	0.159475	0.162886	0.161069	0.160849	NA	NA	NA	NA	NA	NA	NA	NA	NA	NA	NA	NA
CDK2	0.256161	0.260015	0.247686	0.393383	0.37908	0.39156	0.293912	0.288339	0.29849	0.0647838	-0.0345768	-0.669147	0.128095	-1.26193	-1.26189	0.237711	0.245313	0.251355	0.240758	0.104406	0.214869
CDK4	0.144638	0.152962	0.149219	0.375941	0.378449	0.37821	0.329152	0.326457	0.316258	-0.964726	-0.162134	-1.26195	-0.165744	0.0823483	-1.26189	0.00198753	-0.0607236	0.0189178	-0.242818	0.148325	0.0997593
CDK5	0.261412	0.256097	0.259137	0.186402	0.180693	0.183319	0.149932	0.149536	0.162617	-0.0021832	0.0123833	-1.26195	-0.444537	-0.448796	-0.0373907	0.0253413	-1.26193	0.0431152	0.138263	-0.0454544	0.0974453
CDK5RAP1	-0.154227	-0.246795	-0.239752	-0.558176	-0.48357	-0.558944	0.0350809	0.0196133	0.0102422	-1.26195	-1.26195	-0.853004	-1.26194	-1.26193	-1.26189	-0.859659	-0.0194991	0.0310252	-1.26192	-1.26189	-1.26191
CDK5RAP2	0.0417277	0.0394709	0.0430978	0.03638	0.0469136	0.0350809	0.033596	0.0321607	0.0351654	-1.26195	-1.26195	-1.26195	-1.26194	-1.26193	-1.26189	-1.26195	-1.26193	-1.26194	-1.26192	-1.26189	-1.26191
CDK5RAP3	0.303158	0.29893	0.295495	0.270636	0.265984	0.266576	0.248101	0.243971	0.257931	0.280861	0.291728	0.278128	0.316952	0.262971	0.299105	0.237282	0.280453	0.251143	0.263099	0.308172	0.247285
CDK6	0.174676	0.168746	0.15969	0.468224	0.467011	0.460398	0.373226	0.374979	0.372516	0.3225	0.304838	0.30471	0.389789	0.330807	0.312315	0.319035	0.333473	0.362506	0.369557	0.317444	0.374373
CDK7	0.239619	0.221097	0.224654	0.189599	0.18412	0.184257	0.196417	0.19164	0.183109	0.053743	-0.0334434	-0.252671	-0.0182701	0.0227401	-0.00883043	0.142085	0.110506	0.147532	-1.26192	-1.26189	0.199693
CDK8	-0.156957	-0.255691	-0.151353	-0.165749	-0.054908	-0.239752	-1.26198	-1.26198	-1.26198	NA	NA	NA	NA	NA	NA	NA	NA	NA	NA	NA	NA
CDK9	0.297862	0.297463	0.297728	0.275898	0.27021	0.273247	0.293831	0.291857	0.300571	0.120116	0.119882	0.136225	0.0166702	0.102471	0.0877564	0.0974453	0.0712288	0.0432103	0.12433	0.164082	0.092497
CDKAL1	0.1695	0.167448	0.165207	0.090173	0.0924053	0.0878326	0.229807	0.227523	0.22302	-1.26195	-1.26195	-1.26195	-1.26194	-1.26193	-1.26189	-0.0482165	0.0574587	0.0719973	0.0348959	-0.149279	0.0930468
CDKN1A	-1.26197	-1.26197	-1.26197	0.313228	0.3205	0.316502	-0.0208208	0.0391778	0.0409183	NA	NA	NA	NA	NA	NA	NA	NA	NA	NA	NA	NA
CDKN1B	0.114334	0.150654	0.181701	0.0996629	0.126782	0.119108	0.0805766	0.101445	0.0799483	0.314193	0.341374	0.376453	0.292891	0.294946	0.329335	-0.567018	-0.0500767	0.0851055	0.208063	0.18601	0.211991
CDKN2A	-1.26197	-1.26197	-1.26197	0.25076	0.310664	0.284051	-1.26198	-1.26198	-1.26198	NA	NA	NA	NA	NA	NA	NA	NA	NA	NA	NA	NA
CDKN2AIP	0.255529	0.263031	0.258474	0.216674	0.21797	0.215358	0.2688	0.27809	0.279668	0.236898	0.265552	0.226924	0.253661	0.281017	0.225002	0.168769	0.254312	0.225807	0.319943	0.272953	0.255423
CDKN2AIPNL	-0.00508322	-0.0166829	-0.00755939	0.132844	0.127554	0.139336	0.115713	0.155847	0.120069	NA	NA	NA	NA	NA	NA	NA	NA	NA	NA	NA	NA
CDKN2B	-1.26197	-1.26197	-1.26197	0.080238	0.12386	0.0998336	-1.26198	-1.26198	-1.26198	NA	NA	NA	NA	NA	NA	NA	NA	NA	NA	NA	NA
CDKN2C	-1.26197	-1.26197	-1.26197	0.0416114	0.0447044	0.0538934	-0.970219	-0.55839	-0.852974	NA	NA	NA	NA	NA	NA	NA	NA	NA	NA	NA	NA
CDKN2D	-1.26197	-1.26197	-1.26197	0.0233764	0.00908346	0.0400771	-0.452575	-0.245949	-0.447809	NA	NA	NA	NA	NA	NA	NA	NA	NA	NA	NA	NA
CDPF1	0.0952883	0.0724307	0.0751934	0.00119276	-0.00297085	-0.00789822	-1.15057	-0.637318	-1.1643	NA	NA	NA	NA	NA	NA	NA	NA	NA	NA	NA	NA
CDR2	-1.26197	-1.26197	-1.26197	-1.26191	-1.2619	-1.2619	-0.660986	-0.659163	-0.768116	-1.26195	-1.26195	-0.157998	-1.26194	-1.26193	-1.26189	-1.26195	-1.26193	-1.26194	-1.26192	-1.26189	-1.26191
CDS2	0.437841	0.419456	0.420468	0.348123	0.35239	0.347003	0.379354	0.382081	0.364185	0.195563	0.19419	0.168769	0.228146	0.23912	0.260404	0.162718	0.127491	0.203002	0.226149	0.176034	0.13586
CDT1	0.135703	0.125352	0.11821	0.0605411	0.03584	0.0436623	0.151017	0.157313	0.141488	NA	NA	NA	NA	NA	NA	NA	NA	NA	NA	NA	NA
CDV3	0.344403	0.381525	0.393026	0.541425	0.545249	0.545249	0.643989	0.667081	0.632616	0.574388	0.550642	0.541475	0.502435	0.516913	0.517317	0.402868	0.387313	0.384129	0.425705	0.426566	0.415238
CDYL	0.165144	0.16008	0.165689	0.197299	0.212319	0.202172	0.167174	0.174313	0.175665	-0.642688	0.00553102	-0.349337	-1.26194	0.0232557	-1.26189	-0.359333	-1.26193	-1.26194	-1.26192	-1.26189	-1.26191
CDYL2	0.128777	0.125937	0.129191	0.140213	0.129875	0.132007	0.176518	0.176145	0.174744	NA	NA	NA	NA	NA	NA	NA	NA	NA	NA	NA	NA
CEBPB	-1.26197	-1.26197	-1.26197	0.0313984	0.0505112	0.0327421	-1.26198	-1.26198	-1.26198	NA	NA	NA	NA	NA	NA	NA	NA	NA	NA	NA	NA
CEBPG	-1.26197	-1.26197	-1.26197	-0.00181411	0.0154118	0.00938147	-1.26198	-1.26198	-1.26198	-1.26195	-0.247154	-1.26195	-1.26194	-1.26193	-1.26189	-1.26195	-1.26193	-1.26194	-1.26192	-1.26189	-1.26191
CEBPZ	0.239827	0.233644	0.235217	0.283421	0.27214	0.277055	0.324715	0.314949	0.314949	0.203902	0.172769	0.230577	0.0807539	0.109858	0.0945207	0.203081	0.202098	0.22475	0.249055	0.267704	0.290583
CECR5	0.356077	0.350802	0.357478	0.192058	0.198678	0.192932	0.334944	0.333315	0.331801	NA	NA	NA	NA	NA	NA	NA	NA	NA	NA	NA	NA
CELF1	0.24485	0.24189	0.245125	0.182502	0.173897	0.181286	0.304591	0.308963	0.309855	0.0635719	0.0565393	0.00458917	0.145018	0.113569	0.137901	0.149525	0.173006	0.162633	0.160638	0.18351	0.16966
CELF2	0.405033	0.433814	0.454017	0.397309	0.396405	0.397141	0.383624	0.39156	0.386613	0.397535	0.407461	0.4047	0.421938	0.409064	0.427104	0.420068	0.424277	0.406578	0.296726	0.313062	0.319035
CEMIP2	-1.26187	-1.26187	-1.26186	0.0650877	0.0726053	0.061563	-1.2619	-1.2619	-1.2619	-0.789154	-0.666122	-1.26195	0.0718615	-1.26193	0.189661	-0.450997	-1.26193	-1.26194	-1.26192	-1.26189	-1.26191
CENPA	0.201029	0.189906	0.187745	0.163849	0.183415	0.170595	0.236868	0.243224	0.253604	-0.0149849	-1.26195	-1.26195	-1.26194	-1.26193	-1.26189	-0.672407	-1.26193	-1.26194	-1.26192	-1.26189	-1.26191
CENPB	-1.26197	-1.26197	-1.26197	-1.26193	-1.26195	-1.26195	-1.26192	-1.26192	-1.26192	-0.035313	0.0866426	0.00800978	0.00379455	0.0725848	0.128847	-0.64529	-0.152918	-0.447743	-1.26192	-1.26189	-0.0498693
CENPC	0.238887	0.238741	0.236067	0.125661	0.125937	0.121013	0.158588	0.156745	0.155467	-1.26195	0.00125168	-1.26195	0.0819041	0.119136	0.102938	-0.354692	-0.0289777	0.0467638	0.0581073	-0.036994	-0.0669751
CENPE	-1.26187	-1.26187	-1.26187	0.166494	0.176281	0.173257	-1.26188	-1.2619	-1.26189	NA	NA	NA	NA	NA	NA	NA	NA	NA	NA	NA	NA
CENPF	-0.651691	-0.657616	-0.454963	0.105123	0.102685	0.104534	-1.26198	-1.26198	-1.26198	NA	NA	NA	NA	NA	NA	NA	NA	NA	NA	NA	NA
CENPH	0.0964599	0.0969538	0.0774851	0.234047	0.249284	0.234594	-1.26183	-0.861611	-0.966585	NA	NA	NA	NA	NA	NA	NA	NA	NA	NA	NA	NA
CENPI	0.0477517	0.0417277	0.0342323	-0.00648977	-0.0117399	-0.0172159	-0.241029	-0.0592538	-0.246688	NA	NA	NA	NA	NA	NA	NA	NA	NA	NA	NA	NA
CENPJ	-0.867536	-0.877814	-0.857465	-1.26189	-1.26187	-1.2619	-1.26189	-1.26189	-1.2619	NA	NA	NA	NA	NA	NA	NA	NA	NA	NA	NA	NA
CENPK	-1.26197	-1.26197	-1.26197	0.00378198	0.00378198	-0.00769973	-1.26198	-1.26198	-1.26198	NA	NA	NA	NA	NA	NA	NA	NA	NA	NA	NA	NA
CENPL	0.0105561	0.00187608	-0.00479668	-0.0468464	-0.151353	-0.0496033	-1.26198	-1.26198	-1.26198	NA	NA	NA	NA	NA	NA	NA	NA	NA	NA	NA	NA
CENPM	-0.0281733	-0.0499327	-0.0592538	0.00916885	-0.00457799	0.012597	-0.86461	-1.06589	-1.26183	NA	NA	NA	NA	NA	NA	NA	NA	NA	NA	NA	NA
CENPN	-0.0168355	-0.0284607	-0.0381793	-0.00416579	0.00108614	-0.00542838	-0.0485138	-0.0472741	-0.0369195	NA	NA	NA	NA	NA	NA	NA	NA	NA	NA	NA	NA
CENPO	0.0667393	0.0539871	0.0583621	0.0372864	0.0378365	0.0319069	-0.65807	-0.852974	-0.642704	NA	NA	NA	NA	NA	NA	NA	NA	NA	NA	NA	NA
CENPP	0.0369096	0.0267554	0.0285749	-0.239409	-0.0655664	-0.24788	-1.26185	-1.26187	-1.06932	NA	NA	NA	NA	NA	NA	NA	NA	NA	NA	NA	NA
CENPQ	0.0738274	0.0633435	0.0681506	0.153993	0.156745	0.151777	0.0272815	0.01335	0.00261331	NA	NA	NA	NA	NA	NA	NA	NA	NA	NA	NA	NA
CENPT	0.0428576	0.0412169	0.0426137	-0.0103752	0.00857731	0.00659233	0.0075514	0.00460488	0.012733	NA	NA	NA	NA	NA	NA	NA	NA	NA	NA	NA	NA
CENPU	-0.637318	-0.462077	-0.561297	0.0101183	0.0185605	0.00241868	-1.26198	-1.26198	-1.26198	NA	NA	NA	NA	NA	NA	NA	NA	NA	NA	NA	NA
CENPV	0.233174	0.220231	0.2014	0.300244	0.296283	0.289387	0.225443	0.249284	0.233028	0.157635	0.197161	0.131689	0.335161	0.196593	0.196143	0.158878	0.144299	0.114546	0.161507	0.151853	0.19003
CENPW	-1.26197	-1.26197	-1.26197	-1.26194	-1.26192	-1.26194	-1.26198	-1.26198	-1.26198	NA	NA	NA	NA	NA	NA	NA	NA	NA	NA	NA	NA
CENPX	-1.26197	-1.26197	-1.26197	0.00108614	-0.0349538	-0.00326916	-1.26198	-1.26198	-1.26198	NA	NA	NA	NA	NA	NA	NA	NA	NA	NA	NA	NA
CEP120	0.206931	0.204955	0.206178	-0.16919	-0.246278	-0.249608	0.0505901	0.0551418	0.0536636	-1.26195	-1.26195	-0.00568745	-1.26194	-1.26193	-1.26189	-1.26195	-1.26193	-0.029993	-1.26192	-1.26189	-1.26191
CEP128	0.115282	0.111719	0.114572	-0.000756701	0.00195996	-0.00280074	-1.26184	-1.26183	-1.26183	-0.240746	-0.653243	-1.26195	-0.243321	-1.26193	-1.26189	-1.26195	-1.26193	-1.26194	-1.26192	-1.26189	-1.26191
CEP131	0.0353317	0.0403694	0.0359032	0.000344063	0.00253209	0.00071119	-0.0391192	-0.150758	-0.0709226	NA	NA	NA	NA	NA	NA	NA	NA	NA	NA	NA	NA
CEP135	0.269497	0.266467	0.268305	0.108201	0.113036	0.105313	0.165207	0.165449	0.162886	0.00379455	-0.0172967	0.0814863	0.0125108	0.0586497	0.122393	-0.0155878	-1.26193	-0.0391906	0.148963	-0.0256461	0.0846052
CEP152	0.0408568	0.0283649	0.0291307	0.0352371	0.0360529	0.0303325	0.0241852	0.0132305	0.0271532	NA	NA	NA	NA	NA	NA	NA	NA	NA	NA	NA	NA
CEP162	0.0204323	0.0250588	0.0319756	-0.64768	-0.644713	-0.637318	-0.456236	-0.461824	-0.356458	NA	NA	NA	NA	NA	NA	NA	NA	NA	NA	NA	NA
CEP170	-0.00674602	-0.00648977	0.00324149	0.070645	0.06244	0.0701537	0.0713923	0.0770147	0.0784723	-1.26195	0.0907233	-0.643492	0.0855112	0.00954537	-1.26189	-1.06976	-1.26193	-0.649728	-1.26192	-1.26189	-1.26191
CEP170B	-1.26189	-1.26189	-1.26189	-1.07236	-1.16465	-1.06932	-1.26188	-1.26187	-1.26186	NA	NA	NA	NA	NA	NA	NA	NA	NA	NA	NA	NA
CEP192	0.140897	0.136196	0.1432	0.0701537	0.0708004	0.0680933	0.0730903	0.0715829	0.0698177	NA	NA	NA	NA	NA	NA	NA	NA	NA	NA	NA	NA
CEP250	-0.45784	-0.44766	-0.2627	0.121783	0.127499	0.124261	-0.0188846	-0.0110883	-0.00703306	-0.0623548	-0.454754	0.116925	-0.230538	-1.26193	-0.0429405	-0.35312	-1.26193	-1.26194	0.185381	-1.26189	-1.26191
CEP290	0.00482394	0.0287887	0.0178859	0.18065	0.290942	0.31682	0.447655	0.393026	0.477289	NA	NA	NA	NA	NA	NA	NA	NA	NA	NA	NA	NA
CEP295	-0.857556	-0.858519	-0.857556	-1.26197	-1.26197	-1.26197	-1.26183	-1.26184	-1.26184	NA	NA	NA	NA	NA	NA	NA	NA	NA	NA	NA	NA
CEP350	0.106595	0.103271	0.108658	-0.557358	-0.561297	-0.471084	0.0328813	0.0319756	0.0300295	NA	NA	NA	NA	NA	NA	NA	NA	NA	NA	NA	NA
CEP41	0.220492	0.216674	0.214245	0.13391	0.148117	0.131552	0.174118	0.169055	0.168055	-0.15119	-0.00803466	-0.455852	0.0501638	-0.358136	0.0161022	-0.0603207	-0.0361366	-1.26194	-1.26192	-1.26189	-1.26191
CEP44	0.0657525	0.076332	0.0721038	-0.55839	-0.448181	-0.469702	0.0784723	0.0938068	0.0903099	NA	NA	NA	NA	NA	NA	NA	NA	NA	NA	NA	NA
CEP55	-0.559863	-0.655665	-0.646358	0.421104	0.421438	0.42198	0.108242	0.0909064	0.116462	NA	NA	NA	NA	NA	NA	NA	NA	NA	NA	NA	NA
CEP57	0.287232	0.284752	0.281809	0.142918	0.143365	0.138391	0.213098	0.206503	0.201534	NA	NA	NA	NA	NA	NA	NA	NA	NA	NA	NA	NA
CEP57L1	0.0051717	-0.00755939	0.00337084	-1.26195	-1.26193	-1.26195	-0.15923	-0.0643703	-0.0490512	NA	NA	NA	NA	NA	NA	NA	NA	NA	NA	NA	NA
CEP63	0.237484	0.237484	0.243376	0.115886	0.115357	0.109263	0.214321	0.202631	0.190178	NA	NA	NA	NA	NA	NA	NA	NA	NA	NA	NA	NA
CEP68	-1.26183	-1.1643	-1.05027	-0.353234	-0.662067	-0.453054	-0.0381793	-0.0487982	-0.0607326	NA	NA	NA	NA	NA	NA	NA	NA	NA	NA	NA	NA
CEP72	-1.26197	-1.26197	-1.26197	-1.26195	-1.26196	-1.26195	-0.0393957	-0.0166829	-0.00872737	NA	NA	NA	NA	NA	NA	NA	NA	NA	NA	NA	NA
CEP76	0.0330029	0.0334145	0.0417277	0.00435776	0.00324149	0.00460488	0.0275942	0.0282316	0.0321607	NA	NA	NA	NA	NA	NA	NA	NA	NA	NA	NA	NA
CEP78	0.0842618	0.0785581	0.0789934	-1.262	-1.262	-1.262	0.0322864	0.0268541	0.0129123	NA	NA	NA	NA	NA	NA	NA	NA	NA	NA	NA	NA
CEP83	-0.248458	-0.254388	-0.254388	-0.966278	-0.96893	-0.971159	-0.0109321	-0.0196616	-0.0256521	NA	NA	NA	NA	NA	NA	NA	NA	NA	NA	NA	NA
CEP85	-0.647105	-0.150224	-0.0310215	0.166989	0.161374	0.167119	0.0804872	0.0815345	0.0788816	NA	NA	NA	NA	NA	NA	NA	NA	NA	NA	NA	NA
CEP95	0.126133	0.125182	0.123623	-0.645705	-0.671069	-0.650431	-0.460988	-0.456018	-0.644974	NA	NA	NA	NA	NA	NA	NA	NA	NA	NA	NA	NA
CEP97	0.20186	0.18925	0.192058	0.14161	0.140687	0.136636	0.163257	0.17558	0.168236	NA	NA	NA	NA	NA	NA	NA	NA	NA	NA	NA	NA
CEPT1	0.0852828	0.0891376	0.0803309	0.0561383	0.0470489	0.0495141	0.0881498	0.0828134	0.0916691	NA	NA	NA	NA	NA	NA	NA	NA	NA	NA	NA	NA
CERS2	0.176622	0.176281	0.175784	0.232433	0.208229	0.234252	0.16836	0.155233	0.150949	0.0330997	-0.032389	-0.767561	-0.446081	-0.0191002	-1.26189	0.0265013	-0.00883043	0.145825	0.157238	0.12433	0.0873416
CERS4	0.00368898	0.00166441	-0.000861269	0.0375	0.0369096	0.0386879	-1.26191	-1.26189	-1.26187	NA	NA	NA	NA	NA	NA	NA	NA	NA	NA	NA	NA
CERS5	0.15274	0.151725	0.136551	0.208967	0.204898	0.216674	0.0188024	-0.00390394	0.00453753	NA	NA	NA	NA	NA	NA	NA	NA	NA	NA	NA	NA
CERT1	0.2688	0.263573	0.259861	0.316689	0.311407	0.311729	0.281243	0.270083	0.265725	NA	NA	NA	NA	NA	NA	NA	NA	NA	NA	NA	NA
CETN2	0.316689	0.353768	0.384283	0.183496	0.162398	0.17065	0.317554	0.317744	0.303768	0.218313	0.223833	0.2307	0.130958	0.170848	0.203792	-0.0281404	0.146878	0.14454	0.00379455	-1.26189	0.0071726
CETN3	0.0440232	0.126965	0.149145	0.3446	0.330055	0.328169	0.396562	0.363124	0.345405	-1.26195	-1.26195	-0.0414476	-1.26194	-0.0379706	0.0120146	-1.26195	-1.26193	-1.26194	-1.26192	0.00416555	-0.0351079
CFAP20	0.45536	0.46249	0.464102	0.254507	0.268924	0.256828	0.344403	0.33788	0.344974	0.192731	0.203902	0.192315	0.107623	0.27236	0.227236	0.0782079	0.119882	0.115054	-0.0208952	0.107891	0.0864681
CFAP36	-0.654128	-0.243957	-0.0617949	0.157219	0.162147	0.164423	0.12298	0.134617	0.133757	-1.26195	-0.259166	-0.00544859	-1.26194	-1.26193	-1.26189	-0.698283	-1.26193	-1.26194	-1.26192	-1.26189	-1.26191
CFAP97	-0.96893	-0.85938	-0.960399	-1.26191	-1.26193	-1.26192	0.0333409	0.0505112	0.0469901	NA	NA	NA	NA	NA	NA	NA	NA	NA	NA	NA	NA
CFDP1	0.326888	0.368426	0.366458	0.342993	0.350367	0.338987	0.488902	0.491012	0.480904	0.0817836	-0.354692	0.00767459	0.138161	-1.26193	0.0524522	-0.643019	-0.0305803	-1.26194	-1.26192	0.141011	-1.26191
CFL1	5.2588	6.29871	6.29871	5.2588	4.3422	4.71088	4.06585	3.8914	3.8914	1.833	1.833	1.94533	1.76571	2.14293	1.9054	1.94533	1.9054	2.59083	1.833	1.9054	1.73954
CFL2	0.243875	0.240511	0.244232	0.222575	0.217591	0.219799	0.196933	0.203553	0.21102	-1.26195	-1.26195	-1.26195	-1.26194	-1.26193	-1.26189	-0.364591	-1.26193	-1.26194	-1.26192	-1.26189	-1.26191
CGAS	0.0867223	0.0967443	0.0969538	0.113826	0.091866	0.106904	-0.458546	-0.251911	-0.0936605	-1.26195	-1.26195	-0.864981	-1.26194	-1.26193	-0.0607236	-0.043319	0.0638513	0.0890976	-0.157998	-1.26189	-1.26191
CGGBP1	0.536982	0.579044	0.587571	0.421438	0.423322	0.414709	0.373765	0.400879	0.380245	0.343048	0.355246	0.332127	0.303192	0.282202	0.263212	0.314464	0.307446	0.285874	0.236078	0.236192	0.243796
CGRRF1	-1.26197	-1.26197	-1.26197	-1.26197	-1.26196	-1.26197	-1.26198	-1.26198	-1.26198	NA	NA	NA	NA	NA	NA	NA	NA	NA	NA	NA	NA
CHAC2	0.0466862	0.0379654	0.0317464	0.0845047	0.0699152	0.0866113	0.115282	0.113511	0.136551	NA	NA	NA	NA	NA	NA	NA	NA	NA	NA	NA	NA
CHAF1A	-1.26197	-1.26197	-1.26197	0.268718	0.265111	0.264573	0.109411	0.0820503	0.0891376	NA	NA	NA	NA	NA	NA	NA	NA	NA	NA	NA	NA
CHAF1B	-1.26197	-1.26197	-1.26197	0.291368	0.281143	0.288339	0.161374	0.140636	0.151614	-1.26195	-1.26195	-1.26195	-1.26194	-1.26193	-1.26189	0.00767459	-0.00568745	0.00685983	0.0802274	0.0800001	0.139004
CHAMP1	0.259577	0.252593	0.253679	0.0697101	0.0550544	0.0582649	0.243064	0.234157	0.220231	0.205626	0.190336	0.165863	0.22475	0.193059	0.189203	0.172542	0.0486968	0.155184	0.201453	0.0766797	0.179181
CHCHD1	-0.0451456	0.0274971	0.00961779	0.185133	0.201534	0.186875	0.130169	0.165359	0.116125	-1.26195	-1.26195	-1.26195	-1.26194	-1.26193	-1.26189	-0.15119	0.0532786	-1.26194	0.0699747	0.102279	0.037392
CHCHD3	0.451168	0.466551	0.478783	0.467011	0.473324	0.466291	0.518875	0.52741	0.512584	0.342409	0.343568	0.333175	0.346166	0.399837	0.377954	0.279329	0.293493	0.284558	0.254312	0.253132	0.274019
CHCHD4	-1.26197	-1.26197	-1.26197	0.0255868	0.0430978	0.0446154	-1.26198	-1.26198	-1.26198	0.121188	0.106441	0.0800001	0.0403256	0.142085	0.175936	-1.26195	-1.26193	-0.035313	-1.26192	0.0608154	0.0774471
CHCHD5	-0.66628	-0.674306	-0.662328	0.103271	0.0882757	0.0952318	-1.26198	-1.26198	-1.26198	-0.250542	-1.26195	-1.26195	-1.26194	-1.26193	-1.26189	-0.00400518	0.346166	0.0427081	0.0356063	0.0285088	0.0501638
CHCHD6	-0.0296686	0.0259419	0.044782	0.147146	0.174803	0.155687	0.0676721	0.112715	0.0797971	-0.661334	-1.26195	0.0412011	0.0563664	0.140103	0.121533	-0.0148107	0.150772	-1.26194	-1.26192	-1.26189	-1.26191
CHCHD7	-0.363062	-0.446929	-0.259335	0.125182	0.154605	0.144245	-1.26198	-1.26198	-1.26198	0.102696	0.0929281	-0.00702491	0.024805	0.0151528	0.0696653	-1.26195	-1.26193	-1.26194	-1.26192	-1.26189	-1.26191
CHD1	0.160849	0.155961	0.155961	0.157559	0.162294	0.159115	0.221601	0.210751	0.214099	-0.655547	-0.989288	-0.671839	0.152074	0.0649613	0.0800001	0.120227	0.120019	0.135493	0.111519	0.042574	-1.26191
CHD1L	0.259861	0.253371	0.254357	0.0880813	0.0879151	0.0867976	0.220064	0.216131	0.20412	-0.00400518	-0.449855	-0.861184	0.101282	-0.251901	-0.0276931	0.0338345	-1.26193	-1.26194	-1.26192	-1.26189	-1.26191
CHD2	0.209084	0.204796	0.200644	0.127892	0.136196	0.131747	0.141227	0.142223	0.14546	0.1073	0.0245725	0.0681631	0.0938121	0.108924	0.123952	0.0151528	-0.0023189	0.0150488	0.0952865	0.0165138	-1.26191
CHD3	0.255445	0.258115	0.252808	0.156676	0.157721	0.155417	0.15988	0.166411	0.167386	0.230889	0.191934	0.207825	0.32996	0.266674	0.259155	0.150895	0.133187	0.138161	0.0191843	0.114955	0.0412011
CHD4	0.459383	0.446663	0.442971	0.443198	0.448228	0.444647	0.496247	0.493791	0.487677	0.359262	0.346166	0.37908	0.420491	0.367868	0.399655	0.424834	0.429349	0.427616	0.445333	0.435211	0.429609
CHD6	-0.644713	-0.649408	-0.5674	-1.26198	-1.26198	-1.26198	-0.166983	-0.0452966	-0.0444829	NA	NA	NA	NA	NA	NA	NA	NA	NA	NA	NA	NA
CHD7	0.0789934	0.0761624	0.0734417	0.181374	0.176214	0.179717	0.0772876	0.0807531	0.0767561	NA	NA	NA	NA	NA	NA	NA	NA	NA	NA	NA	NA
CHD8	0.178732	0.175396	0.176666	0.137782	0.144186	0.136196	0.169055	0.165848	0.165931	0.0874754	-1.26195	0.214869	0.0601291	-0.0262861	-1.26189	-0.0122958	-1.26193	-0.00968164	-0.00923531	0.0555928	0.0346289
CHD9	-0.252853	-0.257124	-0.253704	-1.26198	-1.26198	-1.26198	-1.26183	-0.962239	-0.959064	NA	NA	NA	NA	NA	NA	NA	NA	NA	NA	NA	NA
CHDH	0.243303	0.235519	0.228564	-1.26199	-1.26198	-1.26199	0.274663	0.279423	0.276396	NA	NA	NA	NA	NA	NA	NA	NA	NA	NA	NA	NA
CHEK1	-1.2619	-1.2619	-1.26189	0.0642064	0.0620346	0.0583621	0.147767	0.133073	0.127499	-1.26195	-1.26195	-1.26195	-1.26194	-1.26193	-1.26189	-0.0709346	-1.26193	-1.26194	0.0299557	0.0149435	0.0033107
CHEK2	-0.0227734	-0.0188846	-0.0311882	0.0559502	0.0527762	0.0558814	-0.663046	-0.65971	-0.653377	NA	NA	NA	NA	NA	NA	NA	NA	NA	NA	NA	NA
CHERP	0.31664	0.285309	0.28764	0.320753	0.324973	0.319853	0.310026	0.304109	0.303231	0.273228	0.283289	0.262896	0.23498	0.203174	0.171485	0.273374	0.236192	0.206869	0.159568	0.18706	0.170424
CHFR	0.130877	0.128204	0.126392	0.0426986	0.0458423	0.0441365	0.0159776	-0.00548811	0.000954436	NA	NA	NA	NA	NA	NA	NA	NA	NA	NA	NA	NA
CHID1	0.26266	0.256828	0.252452	0.147457	0.166411	0.149219	0.176806	0.171695	0.165689	0.179655	0.18899	0.186842	0.0979396	0.179331	0.262896	0.0926234	0.124101	0.141163	0.0855736	0.120227	-1.26191
CHKA	-1.26186	-1.26187	-1.26186	-1.262	-1.262	-1.262	-0.015294	-0.0493286	-0.0452966	NA	NA	NA	NA	NA	NA	NA	NA	NA	NA	NA	NA
CHKB	0.242045	0.249352	0.258222	0.114656	0.122686	0.124114	0.165025	0.166028	0.171426	0.164942	0.163976	0.132437	0.0696653	0.0395828	0.0680687	0.0689085	0.0545653	-0.243671	0.106545	0.209363	0.00198753
CHM	0.201136	0.20325	0.213372	0.234252	0.23544	0.238362	0.231116	0.23262	0.243376	-0.163342	-1.26195	-1.26195	0.0661273	-0.157998	0.0279831	-0.241511	0.000890864	0.00888304	-1.26192	-1.26189	-1.26191
CHML	-0.645329	-0.64411	-0.642704	-1.26198	-1.26198	-1.26198	-1.26198	-1.26198	-1.26198	NA	NA	NA	NA	NA	NA	NA	NA	NA	NA	NA	NA
CHMP1A	0.257116	0.266343	0.260015	0.349526	0.340928	0.343541	0.239968	0.225104	0.220492	0.248498	0.228627	0.225118	0.206296	0.244895	0.226578	-1.26195	0.0313572	-1.26194	0.169839	0.141163	0.175338
CHMP1B	0.474211	0.468602	0.472008	0.357748	0.356948	0.355378	0.356814	0.360291	0.369142	0.224517	0.2313	0.218192	0.234697	0.267003	0.3225	0.0483987	-0.0339168	0.00553102	0.134312	0.115893	0.095687
CHMP2A	0.215884	0.232127	0.286855	0.345819	0.356216	0.347463	0.284986	0.280181	0.294931	0.196305	0.25344	0.21572	0.230889	0.20066	0.232826	-0.248492	0.0256419	0.0496007	0.0884219	0.116787	0.0354377
CHMP2B	-0.866601	-0.968775	-0.352994	0.130367	0.143671	0.140687	0.238362	0.239619	0.259665	-1.26195	0.0810605	0.0975344	-0.0429405	0.0481828	-0.0023189	-1.26195	-1.26193	-1.26194	-0.0321256	0.0316194	0.0122458
CHMP3	0.211317	0.196318	0.185796	0.162933	0.14388	0.152962	0.127765	0.12386	0.131164	NA	NA	NA	NA	NA	NA	NA	NA	NA	NA	NA	NA
CHMP4B	0.475046	0.581513	0.62399	0.636841	0.625921	0.633214	0.346311	0.415815	0.335419	0.221585	0.271683	0.263212	0.23361	0.269199	0.220453	0.138263	0.163862	0.160638	0.265991	0.245666	0.275819
CHMP5	0.157797	0.226614	0.249481	0.253166	0.242475	0.255032	0.19575	0.217652	0.162072	0.0886682	0.106893	0.0185328	-0.0373907	-0.0187528	0.0397573	0.188549	0.0224068	0.0472445	0.266358	0.234389	0.210389
CHMP6	0.251309	0.24485	0.248889	0.221869	0.244681	0.230602	0.166162	0.169695	0.179508	0.0612334	0.128276	0.114955	0.0939039	0.142165	0.188549	0.0580093	0.123134	0.0672681	0.03122	-1.26189	0.0243744
CHMP7	0.170595	0.176518	0.173007	0.188481	0.191568	0.189307	0.222371	0.227902	0.232684	0.221457	0.222029	0.231912	0.129076	0.194373	0.204742	0.216774	0.205211	0.185253	0.190126	0.140726	0.178045
CHN2	0.100685	0.0985861	0.0981676	-1.26199	-1.26199	-1.26199	-1.26192	-1.26192	-1.26192	NA	NA	NA	NA	NA	NA	NA	NA	NA	NA	NA	NA
CHORDC1	0.541825	0.542766	0.547784	0.52133	0.533722	0.521949	0.623187	0.619287	0.636215	0.393168	0.395396	0.422453	0.412588	0.365532	0.284818	0.426264	0.394661	0.359815	0.357644	0.355873	0.374225
CHP1	0.0169132	0.0117388	0.012733	0.31747	0.318191	0.320165	0.375252	0.374543	0.386912	0.0583521	-0.000896475	-0.243671	0.0175505	-0.0135045	0.0521339	-0.664129	-1.26193	-0.655963	0.0851055	0.151467	0.135493
CHPF	-1.26197	-1.26197	-1.26197	-1.26183	-1.26183	-1.26183	0.00804727	0.0207379	0.0187185	NA	NA	NA	NA	NA	NA	NA	NA	NA	NA	NA	NA
CHPF2	-1.26197	-1.26197	-1.26197	0.0412169	0.0448346	0.0502595	-0.0573371	-0.0516166	-0.0525139	NA	NA	NA	NA	NA	NA	NA	NA	NA	NA	NA	NA
CHRAC1	-1.26197	-1.26197	-1.26197	0.203087	0.189178	0.200192	-1.26198	-1.26198	-1.26198	-0.651919	-1.26195	0.0690182	0.0701721	0.0303887	0.0114064	-0.649099	-1.26193	-1.26194	0.178606	0.135682	0.141977
CHST11	-1.26197	-1.26197	-1.26197	-1.16377	-0.356458	-0.660813	-1.26198	-1.26198	-1.26198	NA	NA	NA	NA	NA	NA	NA	NA	NA	NA	NA	NA
CHST12	0.127052	0.127765	0.127278	0.0871527	0.0805766	0.0850592	-0.0401513	-0.0500683	-0.0423287	NA	NA	NA	NA	NA	NA	NA	NA	NA	NA	NA	NA
CHST14	-0.859153	-0.668575	-0.667822	0.0137388	0.0364943	0.0245841	-0.930102	-0.651116	-0.513312	NA	NA	NA	NA	NA	NA	NA	NA	NA	NA	NA	NA
CHST2	-1.26197	-1.26197	-1.26197	-0.0207293	0.0050857	-0.0477277	-1.26198	-1.26198	-1.26198	NA	NA	NA	NA	NA	NA	NA	NA	NA	NA	NA	NA
CHSY1	0.0437364	0.0297112	0.0328813	0.0290064	0.0242755	0.0280086	0.0469901	0.0614715	0.0574419	NA	NA	NA	NA	NA	NA	NA	NA	NA	NA	NA	NA
CHTF18	-0.560723	-0.566176	-0.642896	0.2014	0.20236	0.203619	-0.0112266	-0.0399601	-0.0273748	NA	NA	NA	NA	NA	NA	NA	NA	NA	NA	NA	NA
CHTF8	-0.647324	-0.648435	-0.462601	0.0711492	0.0562431	0.0724307	-1.2619	-1.26189	-1.2619	NA	NA	NA	NA	NA	NA	NA	NA	NA	NA	NA	NA
CHTOP	0.719174	0.71617	0.721681	0.48639	0.514267	0.503012	0.593274	0.633888	0.629334	0.299204	0.31772	0.311339	0.290857	0.307304	0.296884	0.224517	0.255769	0.242332	0.23162	0.2313	0.225118
CHUK	0.128024	0.123077	0.120004	0.163719	0.155767	0.162556	0.174044	0.177817	0.183189	0.104901	0.045714	0.0292248	-1.26194	-1.26193	0.0165138	0.0716932	0.0230393	0.0786819	0.113925	-1.26189	0.167217
CHURC1	-1.26197	-1.26197	-1.26197	0.172717	0.169806	0.162072	0.292251	0.320351	0.311028	-1.26195	-1.26195	-0.239786	-0.0144554	-1.26193	0.0579072	-0.0347095	0.0547299	-0.230538	-1.26192	0.0944137	0.0858182
CHURC1-FNTB	0.0997163	0.109772	0.102596	0.226003	0.224714	0.222744	0.22942	0.246469	0.241742	NA	NA	NA	NA	NA	NA	NA	NA	NA	NA	NA	NA
CIAO1	0.230685	0.230871	0.219503	0.32678	0.3341	0.328352	0.283959	0.27738	0.293831	0.173137	0.192731	0.168028	0.127264	0.141319	0.137236	0.153852	0.197067	0.176034	0.0197863	0.122212	0.185521
CIAO2A	0.0736854	0.0737592	0.0657525	0.174242	0.162072	0.163996	0.09762	0.0817378	0.0719016	-0.0487805	-0.152323	0.00675098	0.0552535	-1.26193	-1.26189	-0.0583453	-1.26193	0.0841861	0.0576337	-1.26189	0.0359092
CIAO2B	-1.26197	-1.26197	-1.26197	0.265602	0.281989	0.280565	0.0258525	0.113094	0.062777	0.159652	0.105995	0.14928	-0.0136647	0.105461	0.0898649	0.117121	0.177848	0.138263	0.27844	0.267327	0.312315
CIAO3	0.153895	0.155577	0.15988	0.114117	0.114403	0.112976	0.202423	0.208175	0.214166	0.0310252	0.0423973	0.00394308	0.109535	0.0971531	0.0787925	-0.968832	0.160869	-1.26194	-1.26192	-1.26189	-1.26191
CIAPIN1	-0.25873	-0.451148	-0.348447	0.315273	0.317219	0.316746	0.293155	0.329799	0.286296	0.19003	0.17672	0.152681	0.218445	0.236847	0.206296	0.235621	0.219139	0.240002	0.179655	0.138353	0.185253
CIB1	-1.26197	-1.26197	-1.26197	0.153118	0.152819	0.164065	-1.26198	-1.26198	-1.26198	0.109952	0.0807539	0.00293129	0.11368	-0.0291609	-0.0592148	-1.26195	-1.26193	-0.0472146	0.0382876	-1.26189	0.0682864
CIC	0.00349764	0.0075514	0.00822444	-0.0350763	-0.0256521	-0.0256521	0.0330029	0.0436623	0.0446154	-0.651326	-0.652155	-0.0568725	-0.00803466	-0.243113	-0.00842717	-1.26195	-1.26193	-1.26194	-1.26192	0.0458285	-1.26191
CILP2	-0.674781	-0.676957	-0.661748	0.0328813	0.0200486	0.0208633	0.0550544	0.0582649	0.0656516	NA	NA	NA	NA	NA	NA	NA	NA	NA	NA	NA	NA
CINP	-0.675337	-0.650782	-0.647105	0.0829561	0.0819585	0.0868801	-0.0668219	-0.000756701	-0.159645	-0.166703	-1.26195	-0.353997	-1.26194	-1.26193	-0.00776754	-1.26195	-1.26193	-1.26194	-0.350048	-1.26189	-1.26191
CIP2A	-0.054908	-0.066212	-0.0452966	0.224654	0.205649	0.219168	-0.160902	-0.453272	-0.255691	NA	NA	NA	NA	NA	NA	NA	NA	NA	NA	NA	NA
CIR1	0.115713	0.114892	0.105192	0.0528719	0.06744	0.0600643	0.101777	0.0931945	0.0871527	NA	NA	NA	NA	NA	NA	NA	NA	NA	NA	NA	NA
CIRBP	0.534321	0.520344	0.525295	0.346187	0.343738	0.33788	0.313522	0.320165	0.310838	0.093532	0.0515936	0.0713482	0.135076	0.150115	-1.26189	0.172769	0.20168	0.217068	0.239232	0.228335	0.237008
CIRH1A	0.225521	0.223249	0.215991	0.215811	0.206672	0.213041	0.29893	0.292251	0.294639	NA	NA	NA	NA	NA	NA	NA	NA	NA	NA	NA	NA
CISD1	0.648518	0.646579	0.651884	0.468813	0.463155	0.472008	0.376444	0.458008	0.397576	0.369178	0.378715	0.375423	0.375024	0.327106	0.327272	0.314826	0.286404	0.252628	0.254546	0.243309	0.237197
CISD2	0.522273	0.508632	0.521949	0.402798	0.380367	0.39587	0.186567	0.211833	0.180403	0.166095	0.206544	0.144299	0.146055	0.141011	0.16966	0.230994	0.268695	0.331684	0.337145	0.328764	0.256975
CISD3	0.242475	0.243303	0.24661	0.158141	0.145523	0.152169	-1.26198	-1.26198	-1.26198	0.0500289	-1.26195	-0.856181	-1.26194	-0.46162	-1.26189	-0.24043	-0.0189329	-0.0409554	-0.0487805	-1.26189	-1.26191
CISH	-1.26197	-1.26197	-1.26197	0.129875	0.123679	0.12142	0.0174943	0.0203299	0.0310941	-1.26195	-1.26195	-1.26195	-1.26194	-1.26193	-1.26189	-0.239271	-1.26193	-1.26194	-1.26192	-1.26189	-1.26191
CIT	-0.0592538	-0.0562753	-0.154617	0.217785	0.219503	0.224006	0.0678138	0.0682288	0.0752502	NA	NA	NA	NA	NA	NA	NA	NA	NA	NA	NA	NA
CIZ1	0.144551	0.143778	0.137954	0.048958	0.0549068	0.0450127	0.125559	0.142825	0.142597	-0.445112	-0.768272	-1.26195	0.0649613	-1.26193	-1.26189	-0.964726	-1.26193	-1.26194	0.0327264	-1.26189	0.0227401
CKAP2	-1.26186	-1.26183	-1.26186	0.182972	0.181454	0.184626	-0.464571	-0.654999	-0.681777	NA	NA	NA	NA	NA	NA	NA	NA	NA	NA	NA	NA
CKAP2L	-0.0936605	-0.471084	-0.468243	0.0574419	0.0544516	0.0574419	-1.26198	-1.26198	-1.26198	NA	NA	NA	NA	NA	NA	NA	NA	NA	NA	NA	NA
CKAP4	-0.0165993	-0.0372075	-0.0275701	0.0945026	0.0762597	0.0761624	0.101445	0.0850592	0.127765	0.127264	0.101873	0.0526871	0.0608154	0.0114064	0.0526871	0.216366	0.188134	0.230235	0.111321	0.197776	0.115054
CKAP5	0.24872	0.241742	0.246305	0.321373	0.312412	0.32253	0.282361	0.275581	0.275416	0.283666	0.265991	0.284935	0.262318	0.282048	0.280184	0.355603	0.331812	0.351218	0.379848	0.378498	0.383856
CKB	0.581925	0.587986	0.587109	1.14813	1.13766	1.11892	0.498393	0.507651	0.520344	NA	NA	NA	NA	NA	NA	NA	NA	NA	NA	NA	NA
CKMT1A	-0.260987	-0.645496	-0.681247	0.056794	0.0807531	0.0549808	-1.26198	-1.26198	-1.26198	NA	NA	NA	NA	NA	NA	NA	NA	NA	NA	NA	NA
CKS2	-1.26197	-1.26197	-1.26197	0.419627	0.434065	0.432853	0.0841927	0.132007	0.0658411	-1.26195	-1.26195	-1.26195	-1.26194	-1.26193	-1.26189	-0.644129	-1.26193	-1.26194	0.0499155	0.0106147	0.0423973
CLASP1	0.139572	0.140448	0.13557	0.237383	0.235617	0.237143	0.189361	0.179355	0.175155	0.111519	0.102696	0.0724573	0.10649	0.063314	-0.0327909	0.172676	0.229042	0.233379	0.172726	0.118634	0.111379
CLASP2	0.256828	0.259759	0.257853	0.270963	0.269418	0.272393	0.254942	0.264857	0.270083	0.0409631	0.0265013	0.0291305	0.221327	0.566136	0.597872	0.0759319	0.0453665	0.108685	0.0429877	0.048006	-0.00423145
CLASRP	0.0897592	0.0830054	0.0881498	0.0815345	0.0734417	0.0747973	0.0571727	0.0520176	0.0512694	-0.248755	0.0668229	0.0567373	-0.0663663	0.123394	0.101383	-0.347972	0.00568956	-0.0347095	-0.0449813	-1.26189	-1.26191
CLCC1	0.240398	0.238044	0.236649	0.205236	0.220844	0.209855	0.231767	0.241583	0.24406	-1.26195	0.103328	0.0868492	0.321615	0.13919	0.00867689	-0.0456489	-1.26193	0.078327	-1.26192	-1.26189	-1.26191
CLCN3	-0.0414351	-0.0512126	-0.0203187	0.0695392	0.0759586	0.0755793	0.0808385	0.0800118	0.0719894	NA	NA	NA	NA	NA	NA	NA	NA	NA	NA	NA	NA
CLCN4	-0.0288438	-0.0352093	-0.0455681	-1.26183	-1.26183	-1.26184	-0.00533848	-0.0154493	-0.015294	NA	NA	NA	NA	NA	NA	NA	NA	NA	NA	NA	NA
CLCN5	-1.26185	-1.26185	-1.26185	0.0745928	0.0793732	0.0783978	-0.353588	-0.243353	-0.0370673	NA	NA	NA	NA	NA	NA	NA	NA	NA	NA	NA	NA
CLCN7	-0.0164382	-0.0175982	-0.0322255	-0.0179613	-0.0125918	-0.0207293	0.193498	0.198678	0.194786	NA	NA	NA	NA	NA	NA	NA	NA	NA	NA	NA	NA
CLDND1	0.117032	0.0940791	0.0777227	0.137692	0.113343	0.130367	0.212723	0.183046	0.199078	-1.26195	-0.445112	-1.26195	-0.460158	-1.26193	-1.26189	0.132617	0.136493	0.0422563	-0.000410329	-1.26189	0.0161022
CLEC16A	0.0237176	0.0304121	0.0248077	-0.0411194	-0.239571	-0.0529072	0.00624007	0.00734505	-0.000586642	-1.26195	-1.26195	-1.26195	-1.26194	-1.26193	-1.26189	-1.26195	0.0286601	0.0856269	0.115054	0.153038	-0.0568725
CLEC2D	0.427274	0.425047	0.426735	0.243224	0.235828	0.242634	0.37482	0.380245	0.380582	NA	NA	NA	NA	NA	NA	NA	NA	NA	NA	NA	NA
CLIC1	0.792648	0.832047	0.839503	1.48541	1.38743	1.44651	0.875774	0.910532	0.905094	0.679583	0.657225	0.642651	0.562548	0.614308	0.625942	0.647017	0.735501	0.676459	0.828052	0.821545	0.733815
CLIC4	0.257703	0.275045	0.26611	0.530208	0.519494	0.523351	0.609742	0.627934	0.668684	-1.26195	-1.26195	-1.26195	-1.26194	-1.26193	-1.26189	0.0541919	0.0265536	-0.356409	0.0171087	-1.26189	0.0579072
CLIC6	-0.0353421	-0.0374598	-0.0247433	-0.35784	-0.677558	-0.558176	-0.643306	-0.674306	-0.866601	NA	NA	NA	NA	NA	NA	NA	NA	NA	NA	NA	NA
CLINT1	0.469834	0.467586	0.461207	0.438039	0.446831	0.445888	0.437656	0.432853	0.440725	0.290707	0.309067	0.258693	0.309736	0.307446	0.306246	0.220453	0.20066	0.119136	0.261365	0.274507	0.230797
CLIP1	0.340928	0.31903	0.334692	0.295959	0.286488	0.295313	0.334587	0.335974	0.33342	0.142725	0.140839	0.196456	0.148521	0.0904089	0.0970493	0.19537	0.270281	0.26519	0.239366	0.226029	0.18706
CLIP2	-0.0316607	-0.0451456	-0.0439344	-0.805386	-0.663046	-0.677558	0.066994	0.0678885	0.0581186	NA	NA	NA	NA	NA	NA	NA	NA	NA	NA	NA	NA
CLK1	-0.678737	-0.768737	-0.648435	-0.0212259	-0.00157988	-0.0229207	0.00299224	-0.0319321	-0.0380293	NA	NA	NA	NA	NA	NA	NA	NA	NA	NA	NA	NA
CLK3	0.229893	0.224006	0.218116	0.221097	0.224221	0.223076	0.233933	0.232941	0.24504	-1.26195	-1.26195	-1.26195	-0.0148107	-0.00756136	-1.26189	-0.137292	-0.449411	-1.26194	-1.26192	-1.26189	-1.26191
CLK4	-0.134031	-0.0621581	-0.0437941	-1.26185	-0.973319	-1.26183	-0.253514	-0.363942	-0.149968	NA	NA	NA	NA	NA	NA	NA	NA	NA	NA	NA	NA
CLN5	-0.00533848	-0.0127122	-0.00288742	-0.241974	-0.362068	-0.240792	-0.159645	-0.246795	-0.250391	NA	NA	NA	NA	NA	NA	NA	NA	NA	NA	NA	NA
CLN6	0.348443	0.342304	0.351188	0.274495	0.287785	0.272664	0.140687	0.133015	0.13123	-1.26195	-1.26195	-1.26195	-1.26194	0.0672681	-0.0138976	-1.26195	-1.26193	-1.26194	-1.26192	-1.26189	-1.26191
CLN8	0.0966842	0.0961028	0.0795778	-1.26191	-1.26193	-1.26193	-1.26198	-1.26198	-1.26198	NA	NA	NA	NA	NA	NA	NA	NA	NA	NA	NA	NA
CLNS1A	0.0668359	0.0698177	0.0698177	0.303768	0.306945	0.300419	0.257332	0.30736	0.213465	0.121458	0.140645	0.177958	0.198395	0.159494	0.171321	0.164599	0.233274	0.210855	0.154639	0.15668	0.191035
CLOCK	-1.26197	-1.26197	-1.26197	-1.26199	-1.26199	-1.26199	-1.26198	-1.26198	-1.26198	NA	NA	NA	NA	NA	NA	NA	NA	NA	NA	NA	NA
CLP1	0.190611	0.192232	0.193498	0.130877	0.121013	0.131682	0.158865	0.148643	0.134469	-1.26195	-0.356772	-1.26195	0.00661797	0.0932778	0.0557459	-1.26195	0.0836457	-1.26194	-0.0506875	-1.26189	-1.26191
CLPB	0.121482	0.12215	0.133554	0.170366	0.162835	0.15988	0.275959	0.272393	0.272664	0.027663	0.0729857	0.0834673	0.000712746	0.0233938	0.0891885	0.107891	0.0784257	0.107891	-1.26192	0.0241138	-0.0558366
CLPP	0.103029	0.114403	0.108606	0.251625	0.256739	0.251031	0.346444	0.358316	0.331061	0.259903	0.252057	0.277167	0.181793	0.24207	0.229932	0.221457	0.219324	0.218766	0.170548	0.162718	0.188549
CLPTM1	0.163803	0.159115	0.164259	0.21797	0.219092	0.219576	0.319966	0.305861	0.2795	-1.26195	-1.26195	-1.26195	-0.00181017	0.13586	0.120276	0.151605	0.165254	0.17181	0.178878	0.219425	0.179083
CLPTM1L	0.234528	0.228685	0.227116	0.161595	0.143937	0.167236	0.188867	0.170088	0.170527	0.0438107	-1.26195	-0.789154	-0.348542	0.0406582	0.0532786	0.0832647	-0.0358935	-1.26194	0.194268	0.215604	0.0185328
CLPX	0.189906	0.182595	0.188345	0.215991	0.209778	0.214955	0.208175	0.196318	0.199798	-1.26195	-0.964726	-0.449855	-1.26194	-1.26193	-0.074545	0.222693	0.170548	0.232599	0.24602	0.203473	0.328032
CLSPN	-0.861324	-0.859566	-0.653101	0.0600643	0.0572566	0.0521436	-1.26198	-1.26198	-1.26198	NA	NA	NA	NA	NA	NA	NA	NA	NA	NA	NA	NA
CLTA	0.0723232	0.0775843	0.0731436	0.35239	0.360396	0.370529	0.132713	0.155467	0.079877	0.234811	0.234269	0.138353	0.15291	0.226149	0.233379	0.0467638	0.0810605	0.116686	0.245169	0.27971	0.196908
CLTB	-0.250099	-0.044156	-0.00235878	0.162781	0.178897	0.18585	-1.26198	-1.26198	-1.26198	0.304265	0.288174	0.283289	0.232015	0.273056	0.283289	0.0800964	-1.26193	-1.26194	0.20453	0.2368	0.210287
CLTC	0.695717	0.666401	0.665539	0.720417	0.724559	0.723386	0.631956	0.629334	0.656635	0.962154	0.962154	0.906359	0.864581	0.873508	0.906359	0.93504	0.873508	0.922117	1.17278	1.02719	0.983058
CLUAP1	-0.0243467	-0.0128338	0.00558292	-1.26185	-1.26186	-1.26187	0.128712	0.121013	0.105891	NA	NA	NA	NA	NA	NA	NA	NA	NA	NA	NA	NA
CLUH	0.152105	0.146374	0.149291	0.232011	0.231382	0.226709	0.433564	0.425494	0.426211	-1.26195	-1.26195	-0.0047994	-1.26194	-1.26193	-1.26189	0.243309	0.232446	0.263212	0.277412	0.280184	0.309451
CLYBL	0.350207	0.356077	0.357648	0.168176	0.141036	0.149848	0.255747	0.268137	0.283264	0.145438	0.145708	0.0961191	0.116925	0.118634	0.116787	-1.26195	0.0849876	0.012871	-0.150016	-1.26189	-1.26191
CMAS	0.576555	0.579748	0.581513	0.412649	0.410983	0.414146	0.369142	0.371568	0.381933	0.38285	0.377954	0.373904	0.357521	0.377701	0.378715	0.308736	0.276203	0.325402	0.274633	0.264698	0.171723
CMC1	0.120004	0.145931	0.147457	0.0237176	0.0346493	0.0266587	0.10493	0.158232	0.133126	NA	NA	NA	NA	NA	NA	NA	NA	NA	NA	NA	NA
CMC2	0.0209868	0.0255157	0.0279089	0.340476	0.366559	0.351383	0.222575	0.232061	0.241407	NA	NA	NA	NA	NA	NA	NA	NA	NA	NA	NA	NA
CMIP	-0.260581	-0.245949	-0.153759	-0.249838	-0.265509	-0.250391	0.0738274	0.049235	0.0441365	NA	NA	NA	NA	NA	NA	NA	NA	NA	NA	NA	NA
CMPK1	0.398154	0.453853	0.467255	0.555315	0.553738	0.552784	0.602606	0.590501	0.572311	0.340765	0.336608	0.332581	0.321272	0.390891	0.386926	0.332733	0.368754	0.365147	0.35494	0.38285	0.369178
CMPK2	0.399838	0.398541	0.398346	0.0440232	0.048867	0.0466862	0.261181	0.255817	0.277454	-0.0184511	0.00109596	0.064033	0.0996776	0.0343218	-0.0345768	0.314019	0.310856	0.351361	0.0811931	0.0631094	0.0165138
CMSS1	0.130823	0.131101	0.126457	0.214475	0.206414	0.216217	0.118678	0.0971779	0.0922287	0.130515	0.127028	0.141837	0.130181	0.0967215	0.134583	0.0329271	0.137901	0.0329271	0.0747528	0.00755002	-1.26191
CMTM6	0.16457	0.15226	0.12134	0.135703	0.192584	0.177113	0.188099	0.171255	0.171255	NA	NA	NA	NA	NA	NA	NA	NA	NA	NA	NA	NA
CMTM7	0.235217	0.233278	0.243449	0.204846	0.232127	0.217395	0.135945	0.137358	0.144245	0.119882	-0.000735989	0.0259185	0.0813351	0.0886682	-1.26189	7.5021e-05	0.0793895	-0.448796	-1.26192	-1.26189	0.0341169
CMTR1	0.399735	0.395264	0.392234	0.321718	0.315352	0.317154	0.31872	0.324813	0.331721	0.157094	0.098108	0.137023	0.18957	0.171568	0.123394	0.277917	0.246232	0.282368	0.133885	0.130564	0.130019
CMTR2	-0.245949	-0.252427	-0.254182	-0.254182	-0.24058	-0.245265	0.10228	0.111222	0.110868	NA	NA	NA	NA	NA	NA	NA	NA	NA	NA	NA	NA
CNBP	0.625921	0.681476	0.679755	1.11892	1.14813	1.11155	1.11892	1.1046	1.14256	0.289809	0.313641	0.298661	0.290079	0.372837	0.332456	0.297053	0.311111	0.290251	0.334898	0.335638	0.307579
CNDP2	0.422658	0.417647	0.412649	0.995863	0.975992	1.00212	0.436342	0.430245	0.446312	0.550006	0.558571	0.553152	0.504926	0.519591	0.537116	0.528645	0.556345	0.555501	0.586506	0.574388	0.594061
CNEP1R1	0.218922	0.224381	0.226065	0.153436	0.172451	0.166101	0.308007	0.296993	0.292877	NA	NA	NA	NA	NA	NA	NA	NA	NA	NA	NA	NA
CNIH1	-1.26197	-1.26197	-1.26197	0.0954886	0.100025	0.0961028	-0.0617949	-0.00594008	0.0161529	NA	NA	NA	NA	NA	NA	NA	NA	NA	NA	NA	NA
CNIH4	0.356814	0.353576	0.353768	0.273694	0.269582	0.260015	0.332697	0.332811	0.328433	0.122469	0.116328	0.102559	0.113078	0.177549	0.167818	0.0933638	0.0800964	0.104901	-1.26192	-0.0202665	-1.26191
CNN2	0.316444	0.364063	0.358507	0.356345	0.350207	0.360648	0.396993	0.425047	0.402966	0.683881	0.669635	0.679583	0.464208	0.616382	0.639496	0.408803	0.361408	0.379533	0.497601	0.551884	0.623342
CNN3	0.202172	0.232526	0.233474	0.0154118	-0.0052244	0.00359528	0.377245	0.416566	0.398541	NA	NA	NA	NA	NA	NA	NA	NA	NA	NA	NA	NA
CNNM2	-0.448506	-0.452575	-0.449047	-1.16387	-0.856778	-1.16448	-1.26192	-1.26192	-1.26192	NA	NA	NA	NA	NA	NA	NA	NA	NA	NA	NA	NA
CNNM3	0.0860196	0.0843348	0.0773862	-0.0407938	-0.0526848	-0.0655664	0.136551	0.132521	0.127832	0.331268	0.340592	0.340967	0.299706	0.336781	0.344983	0.290414	0.304508	0.277082	0.272216	0.30471	0.290707
CNNM4	-0.862359	-0.968466	-0.961026	-1.2619	-1.2619	-1.26189	-0.637318	-0.643758	-0.353588	NA	NA	NA	NA	NA	NA	NA	NA	NA	NA	NA	NA
CNOT1	0.321373	0.310838	0.312753	0.306945	0.311167	0.307451	0.320251	0.319093	0.321057	0.33986	0.338767	0.355603	0.284472	0.297752	0.293943	0.342917	0.303876	0.340248	0.307446	0.3135	0.31335
CNOT10	0.197224	0.188434	0.194349	0.190968	0.19024	0.190496	0.126848	0.120004	0.119727	0.087237	-0.0240077	-0.0629382	0.0862326	0.189462	-1.26189	-0.163342	0.149973	0.168028	-0.0218401	0.0112427	0.0356063
CNOT11	0.129122	0.121241	0.130935	0.122443	0.102524	0.11263	0.221438	0.222371	0.230113	0.0623644	0.00685983	-0.446081	-1.26194	-1.26193	-0.0496021	-1.26195	0.111806	0.200831	0.174743	0.113078	0.203311
CNOT2	0.14142	0.170702	0.172555	0.216057	0.222854	0.218773	0.270401	0.292618	0.275898	0.0484424	0.025061	-0.150742	0.0914287	0.154639	0.148219	0.137023	0.0129939	0.0468842	0.165374	0.171207	0.166263
CNOT3	0.28764	0.284657	0.280093	0.231829	0.212173	0.224468	0.212556	0.211995	0.210603	0.195197	0.109359	0.112331	0.202685	-0.353997	0.0245725	0.0568878	0.187314	0.145614	0.229441	0.00606993	0.179275
CNOT4	0.0368002	0.0217814	0.0236155	0.0754773	0.0758782	0.0727128	0.0931945	0.0890333	0.0956791	-1.26195	-1.26195	-1.26195	-1.26194	-1.26193	-1.26189	-1.26195	-1.26193	-0.558168	-1.26192	-1.26189	-1.26191
CNOT6	0.0558814	0.0549068	0.0528719	0.0720469	0.0791183	0.0799483	0.0651854	0.0651854	0.0702602	NA	NA	NA	NA	NA	NA	NA	NA	NA	NA	NA	NA
CNOT6L	0.174044	0.167119	0.154445	0.099485	0.09712	0.0962763	0.134617	0.135876	0.141227	0.0265013	0.135682	0.133772	0.0998607	0.0912032	0.119739	-0.0554642	-1.26193	-1.26194	-1.26192	-1.26189	-1.26191
CNOT7	0.306701	0.291857	0.28598	0.327127	0.338266	0.326974	0.2785	0.280509	0.289589	0.047526	0.0664615	0.0706635	0.09599	0.0478734	-0.0104894	-1.26195	0.0619151	-1.26194	0.0931855	0.0553574	0.134516
CNOT8	0.123484	0.107254	0.0992953	0.271912	0.276585	0.270963	0.204384	0.202287	0.20579	NA	NA	NA	NA	NA	NA	NA	NA	NA	NA	NA	NA
CNOT9	0.285766	0.299375	0.302049	0.39156	0.387043	0.387043	0.195626	0.24449	0.251883	0.220223	0.184783	0.164372	0.0332121	0.0631844	0.0791293	0.0392535	-1.26193	0.0859604	0.292891	0.218595	0.241107
CNP	0.566481	0.561819	0.565938	0.444841	0.458553	0.453323	0.423841	0.416885	0.412649	0.193625	0.218595	0.203397	0.262794	0.20168	0.230037	0.398952	0.364069	0.385877	0.181793	0.18863	0.197161
CNPY2	0.105955	0.143671	0.148253	0.449169	0.443985	0.457496	0.390428	0.387289	0.395414	0.333657	0.305764	0.316289	0.24504	0.308593	0.277412	0.339081	0.342306	0.304982	0.380115	0.406578	0.396635
CNPY3	0.229337	0.222653	0.217591	0.286657	0.293409	0.288129	0.214955	0.204898	0.213837	0.105522	0.182201	0.192618	0.187363	0.180862	0.188721	0.283809	0.302076	0.283809	0.126624	0.0235846	0.110113
CNPY4	0.172774	0.228862	0.223945	0.313613	0.307451	0.311514	0.216955	0.222575	0.188709	0.106893	0.1293	0.115181	0.0505564	0.0358178	0.098629	0.0840573	0.087237	0.0438107	-0.155116	-0.0133305	-0.0200536
CNST	-0.664711	-0.562767	-0.448369	-1.26185	-1.26187	-1.26186	-0.871257	-0.655802	-0.655937	0.107535	0.0332121	0.0884219	-0.465172	0.0177787	0.0465521	-1.26195	-0.0285625	-1.26194	-1.26192	-1.26189	-0.157998
CNTRL	0.172644	0.168567	0.183496	0.175912	0.176757	0.173093	0.131101	0.138537	0.133073	0.078327	0.0967215	0.0676413	0.181582	-0.040698	0.0458285	0.216453	0.0851055	0.157747	0.244379	0.288729	0.282933
CNTROB	0.0306169	0.0194567	0.0296116	0.0434761	0.0536636	0.0428576	-0.0170714	0.00359528	-0.0102596	-1.26195	0.0308809	0.0289461	-0.046281	-1.26193	0.0485874	-1.26195	-1.26193	-1.26194	-1.26192	-1.26189	-1.26191
COA3	0.108415	0.110325	0.109627	0.105681	0.098777	0.104669	-1.26198	-1.26198	-1.26198	-1.26195	0.154507	-0.46412	0.0253413	0.130868	0.160768	0.0423973	0.0409631	0.0977662	0.105737	0.118482	0.0946482
COA5	0.206274	0.218847	0.235297	0.0201444	-0.0129332	0.0232855	-1.26198	-1.26198	-1.26198	-0.00883043	-9.9329e-05	-1.26195	-0.0503238	0.0796643	-1.26189	-1.26195	-1.26193	-1.26194	-1.26192	-1.26189	-1.26191
COA7	0.0486521	0.0582649	-0.0191053	0.162294	0.163621	0.157313	0.19393	0.198945	0.187095	-1.26195	-1.26195	-1.26195	-1.26194	-1.26193	-1.26189	-0.0516849	-0.0526441	-1.26194	-0.0254189	0.0268962	-0.0516849
COA8	0.111811	0.108658	0.111101	-0.0617949	-0.247258	-0.166397	0.117321	0.111624	0.0933685	NA	NA	NA	NA	NA	NA	NA	NA	NA	NA	NA	NA
COASY	0.185026	0.173517	0.167119	0.16008	0.154682	0.154061	0.0743449	0.0752502	0.0946624	0.282535	0.265354	0.264089	0.27076	0.211477	0.220378	0.222413	0.224517	0.250405	0.253555	0.203664	0.16109
COBLL1	-1.26189	-1.26189	-1.26189	0.113094	0.117321	0.124759	-1.26198	-1.26198	-1.26198	NA	NA	NA	NA	NA	NA	NA	NA	NA	NA	NA	NA
COG1	0.137544	0.134521	0.130769	0.154388	0.149848	0.155767	0.100104	0.0982586	0.104669	-0.0023189	-0.0367588	0.0356063	-0.04201	0.0243744	0.170934	0.0890976	-0.259166	-0.0377071	-1.26192	-1.26189	-1.26191
COG2	0.177726	0.168176	0.172644	0.216217	0.210751	0.213644	0.143112	0.144076	0.148396	-1.26195	-1.26195	-1.26195	-1.26194	-1.26193	-1.26189	0.0281261	-1.26193	-0.0013201	0.0555928	0.00233538	-1.26191
COG3	0.161677	0.154445	0.156498	0.170968	0.167693	0.171695	0.124114	0.114733	0.122686	-0.675301	-0.960745	-0.767333	-1.26194	-1.26193	-1.26189	0.125894	0.00828802	0.0844116	-0.0446281	0.127847	0.0807539
COG4	0.134402	0.128777	0.130316	0.180936	0.182098	0.175868	0.156807	0.146648	0.156939	-1.26195	-0.0270021	0.0144442	-1.26194	-1.26193	-0.00443531	-0.257079	-1.26193	-1.26194	0.0507001	-0.0483974	0.038879
COG5	0.158397	0.155847	0.155295	0.205165	0.195626	0.201136	0.143473	0.143473	0.154061	NA	NA	NA	NA	NA	NA	NA	NA	NA	NA	NA	NA
COG6	0.127765	0.123219	0.122835	0.169428	0.16457	0.168746	0.0326441	0.0306169	0.0378365	-1.26195	-0.155116	-1.26195	-1.26194	-1.26193	-1.26189	-1.26195	-0.245361	-1.26194	-1.26192	-1.26189	-1.26191
COG7	0.120333	0.110073	0.119727	0.13915	0.139628	0.137873	0.142223	0.142432	0.149761	-0.0024716	-1.26195	-1.26195	0.0886682	-1.26193	0.0033107	0.0634082	-1.26193	-0.663599	-1.26192	-1.26189	-1.26191
COG8	0.158232	0.153178	0.150112	0.154931	0.162886	0.157983	0.107913	0.107567	0.107913	0.0449853	-0.0260745	0.0224068	-0.657586	-0.350048	0.229441	-1.26195	-1.26193	-0.651127	-1.26192	-1.26189	-0.162134
COIL	0.104302	0.0986683	0.0947919	0.128204	0.135146	0.126233	0.150536	0.151427	0.148117	0.0422563	-0.67159	0.0338345	-0.666122	-1.26193	-1.26189	-0.449855	-0.00464074	0.042574	0.117301	0.111186	0.0817836
COL1A1	0.110116	0.0376546	-0.0529072	-1.26194	-1.26194	-1.26195	0.0103564	-0.0178672	-0.0551082	NA	NA	NA	NA	NA	NA	NA	NA	NA	NA	NA	NA
COL6A1	0.228769	0.152299	0.136453	-1.26189	-1.26192	-1.26188	-0.0058344	0.0429413	-0.652209	NA	NA	NA	NA	NA	NA	NA	NA	NA	NA	NA	NA
COL6A2	0.0201444	-0.462279	-0.648305	-1.262	-1.262	-1.262	-1.26187	-0.965406	-1.26189	NA	NA	NA	NA	NA	NA	NA	NA	NA	NA	NA	NA
COL6A3	0.0684435	-0.23907	-0.257507	-1.262	-1.262	-1.262	-0.860022	-0.350828	-1.26188	NA	NA	NA	NA	NA	NA	NA	NA	NA	NA	NA	NA
COLGALT1	0.0139655	0.00288173	0.00435776	0.203619	0.214955	0.210925	0.225313	0.216826	0.218662	-1.26195	-0.959802	-0.857434	-1.26194	-1.26193	-1.26189	-0.0287541	-1.26193	-1.26194	0.0580093	-0.04201	-1.26191
COMMD1	0.30424	0.311729	0.320753	0.287232	0.278869	0.280688	0.242233	0.249215	0.258533	NA	NA	NA	NA	NA	NA	NA	NA	NA	NA	NA	NA
COMMD10	0.117653	0.137073	0.132521	0.151315	0.167608	0.154682	0.232684	0.231496	0.220163	-1.26195	-1.26195	-1.26195	-0.646244	-1.26193	-1.26189	-1.26195	-1.26193	-1.26194	-1.26192	-0.00145209	-0.255123
COMMD2	0.251559	0.250214	0.243971	0.300571	0.280093	0.298298	0.0500344	0.0528719	0.0684435	0.0185328	-0.0176975	0.0235846	-0.0409554	-1.26193	-0.0520641	0.0809681	0.0438107	0.0397573	0.221677	0.231912	0.19293
COMMD3	-0.0208208	0.0156389	0.0347355	0.301011	0.278433	0.295863	0.0777227	0.112151	0.0830639	0.197866	0.206349	0.223084	0.161507	-0.0106937	0.095787	0.108603	0.0494972	-0.0111718	0.200194	0.023741	0.140645
COMMD4	0.191041	0.186875	0.188013	-0.0417596	-0.246688	-0.252666	0.146733	0.137292	0.122835	-0.00946536	-1.26195	-0.46598	-0.46412	-0.0692839	-0.0223463	0.0534499	0.260108	0.101282	-1.26192	0.0445189	0.171994
COMMD5	0.0406491	0.0504472	0.0603651	-0.0363333	-0.000451936	-0.0255022	-0.00559819	-0.00157988	-0.0086004	0.08756	0.0663334	0.120471	-1.26194	-1.26193	0.115631	-0.558983	-0.0551046	-1.26194	-1.26192	-1.26189	-1.26191
COMMD6	-0.00941525	-0.00457799	-0.0270604	0.127615	0.134097	0.134469	0.0840245	0.108201	0.109348	NA	NA	NA	NA	NA	NA	NA	NA	NA	NA	NA	NA
COMMD7	0.174313	0.189361	0.149761	0.125865	0.116805	0.125034	-0.665226	-0.663791	-0.862359	NA	NA	NA	NA	NA	NA	NA	NA	NA	NA	NA	NA
COMMD8	-0.643027	-0.558944	-0.562767	0.0612275	0.0247483	0.0530507	0.0865574	0.123767	0.0570741	0.0593324	0.122722	0.0241138	-1.26194	-1.26193	-1.26189	-0.000896475	-1.26193	-1.26194	-1.26192	-0.15644	0.128532
COMMD9	-1.26197	-1.26197	-1.26197	0.188394	0.168906	0.176866	0.213644	0.20186	0.199557	0.176787	0.162078	0.136071	-0.0564433	-0.356409	-0.0006156	0.0950868	0.103554	0.0763533	0.172388	0.130378	0.189462
COMT	0.23919	0.23574	0.224867	0.356077	0.328433	0.349726	0.21572	0.217785	0.227754	0.215511	0.147966	0.213546	0.153727	0.18991	0.193949	0.23835	0.247903	0.33147	0.266674	0.258693	0.27521
COMTD1	0.157085	0.160323	0.176716	0.165779	0.177532	0.158938	0.19915	0.204616	0.201683	0.064033	-1.26195	-1.26195	0.0654534	0.08756	-1.26189	-1.26195	-1.26193	-1.26194	-1.26192	-1.26189	-1.26191
COP1	-0.643428	-0.650084	-0.648894	-1.2619	-1.26191	-1.2619	-0.451148	-0.561297	-0.560723	NA	NA	NA	NA	NA	NA	NA	NA	NA	NA	NA	NA
COPA	0.493791	0.486087	0.478553	0.484984	0.486886	0.490152	0.467255	0.464536	0.475255	0.510114	0.507782	0.512143	0.53324	0.538443	0.566985	0.583497	0.620186	0.59553	0.555501	0.543351	0.571895
COPB1	0.488475	0.481967	0.478063	0.546013	0.538977	0.544519	0.458553	0.452738	0.459163	0.493246	0.526457	0.513222	0.497601	0.455619	0.460807	0.597872	0.580895	0.581575	0.579044	0.58917	0.587957
COPB2	0.485446	0.4728	0.474408	0.477289	0.47999	0.478063	0.489934	0.488664	0.491285	0.484706	0.48961	0.481557	0.526928	0.531438	0.542115	0.488806	0.472533	0.472994	0.424507	0.426018	0.412311
COPE	0.320077	0.336666	0.329799	0.512209	0.512926	0.510805	0.509368	0.513619	0.507651	0.290251	0.310372	0.305764	0.31335	0.275068	0.299894	0.307144	0.331268	0.331268	0.278339	0.324067	0.321438
COPG1	0.40768	0.396217	0.387703	0.492525	0.496494	0.502583	0.406523	0.397309	0.410061	0.455961	0.459886	0.466204	0.460496	0.432597	0.462796	0.525994	0.536206	0.505877	0.517317	0.557533	0.567578
COPG2	0.328169	0.316502	0.30904	0.319399	0.313044	0.319504	0.245215	0.248574	0.275736	0.146055	0.115631	0.109952	0.0958721	0.130474	0.161758	0.146411	0.222413	0.201453	0.212475	0.168619	0.187417
COPS2	0.406647	0.394797	0.407195	0.387289	0.389003	0.386761	0.387289	0.384917	0.376705	0.377701	0.366454	0.38617	0.367593	0.357317	0.351361	0.310078	0.356924	0.350466	0.311339	0.276508	0.324067
COPS3	0.412286	0.402966	0.414146	0.391257	0.388211	0.386912	0.368199	0.359593	0.354137	0.256092	0.264806	0.262429	0.156411	0.196456	0.181903	0.306979	0.304982	0.337909	0.351041	0.328618	0.328435
COPS4	0.338135	0.34558	0.350367	0.426594	0.41566	0.424694	0.361937	0.370201	0.374293	0.388899	0.367387	0.376245	0.336608	0.32606	0.329781	0.311997	0.337592	0.341153	0.304508	0.322985	0.268551
COPS5	0.367373	0.364867	0.370675	0.340571	0.336291	0.339332	0.376843	0.379522	0.389699	0.301903	0.31335	0.308014	0.289969	0.29382	0.283534	0.293493	0.251094	0.258244	0.377098	0.393326	0.35201
COPS6	0.331061	0.3224	0.31437	0.42986	0.419037	0.427274	0.286129	0.286657	0.301936	0.322876	0.325933	0.335455	0.233379	0.212133	0.177392	0.266915	0.301764	0.286537	0.227019	0.241459	0.218595
COPS7A	0.308007	0.305078	0.307537	0.277787	0.274075	0.275581	0.311095	0.305989	0.300244	0.167343	0.120116	0.169006	0.166837	0.0382876	0.07507	-0.24446	0.0971531	0.113078	0.0271113	0.100956	0.0455814
COPS7B	0.277276	0.274962	0.287951	0.319156	0.322055	0.319966	0.256378	0.261108	0.246781	0.165863	0.121661	0.137763	0.146738	0.131094	0.181248	0.178976	-0.0191002	0.108091	0.0970493	0.1073	0.162799
COPS8	0.055211	0.0915113	0.0857577	0.349982	0.350605	0.353576	0.342905	0.365608	0.332431	0.203248	0.219425	0.236635	0.259041	0.2307	0.247667	0.232599	0.188397	0.148731	0.222693	0.233721	0.214574
COPZ1	0.364583	0.362996	0.345819	0.498112	0.495489	0.490579	0.452053	0.462087	0.45099	0.376862	0.311498	0.351528	0.296152	0.268228	0.28161	0.373904	0.404059	0.439755	0.420491	0.357521	0.364391
COQ2	-1.26197	-1.26197	-1.26197	-1.262	-1.262	-1.262	0.0578377	0.0526002	0.0466213	NA	NA	NA	NA	NA	NA	NA	NA	NA	NA	NA	NA
COQ3	0.00173265	0.0151609	0.0190803	-1.26194	-1.26195	-1.26195	-1.26198	-1.26198	-1.26198	NA	NA	NA	NA	NA	NA	NA	NA	NA	NA	NA	NA
COQ4	-0.152007	-0.045723	-0.0353421	0.0266587	0.0262291	0.0252636	0.0494252	0.059988	0.0632671	NA	NA	NA	NA	NA	NA	NA	NA	NA	NA	NA	NA
COQ5	0.122401	0.136636	0.132417	0.110116	0.120215	0.107254	0.202287	0.20236	0.191361	-0.00464074	0.10177	0.0964501	-0.0629382	0.0613457	-1.26189	-0.451447	0.053743	-1.26194	-1.26192	-1.26189	-1.26191
COQ6	0.124485	0.120258	0.110708	0.0477517	0.0387955	0.0391778	0.0816767	0.0750712	0.0868801	0.190478	0.154752	0.190751	-1.26194	-1.26193	0.0793895	-1.26195	-1.26193	-1.26194	-1.26192	-0.0339168	-0.151882
COQ7	-1.26197	-1.26197	-1.26197	-0.0512126	-0.251431	-0.472938	-1.26189	-1.26183	-1.26186	0.0354377	-0.0178945	0.0496007	-1.26194	-1.26193	-1.26189	0.0343218	0.126185	0.0789417	-1.26192	-1.26189	-1.26191
COQ9	0.0635022	0.0811807	0.0916691	0.142044	0.140897	0.133273	0.225104	0.228685	0.224221	0.170597	0.137901	0.134227	0.125683	0.202864	0.180343	0.107152	0.123603	0.0581073	0.138465	0.0701721	0.00936275
CORO1A	3.05206	3.05206	3.05206	1.63896	1.5578	1.57972	2.47465	2.47465	2.55246	2.74425	2.74425	2.74425	3.53767	3.53767	3.09238	2.97036	2.47588	3.32331	2.21958	2.59083	2.25522
CORO1B	0.508108	0.483436	0.490783	0.417647	0.419456	0.42127	0.434627	0.43516	0.438039	-0.679497	-0.86002	0.042574	-0.0468124	-0.0235171	0.138923	-0.0312298	-1.26193	0.0393887	0.224255	0.102696	0.181499
CORO1C	0.443729	0.443551	0.458218	0.464102	0.45099	0.46562	0.389873	0.395264	0.400332	-0.668329	-0.959202	-1.26195	0.150667	0.159159	0.117244	0.134428	0.0323969	0.128652	0.117964	0.0490976	0.107152
CORO2A	0.0882757	0.072954	0.0700257	0.287857	0.261181	0.299485	0.103621	0.0771037	0.0849761	-1.26195	-1.16823	-1.26195	0.0209414	-0.0400405	-0.0558366	-1.26195	-1.26193	-0.452811	-1.26192	-1.26189	-1.26191
CORO7	0.534706	0.507087	0.512584	0.425875	0.41597	0.423841	0.419037	0.421805	0.426059	0.530208	0.537116	0.535458	0.526457	0.489976	0.494107	0.59611	0.619345	0.600088	0.486512	0.410904	0.44924
COTL1	4.3422	4.3422	4.3422	1.49732	1.50887	1.42137	2.82302	2.55246	2.95872	1.24419	1.28307	1.27565	1.19251	1.30272	1.27565	0.888788	0.860672	0.788601	0.665961	0.687041	0.653518
COX10	0.0713923	0.068521	0.0811807	-0.663443	-1.26183	-0.966898	-1.26198	-1.26198	-1.26198	NA	NA	NA	NA	NA	NA	NA	NA	NA	NA	NA	NA
COX11	-0.0262164	-0.00797977	-5.93895e-05	0.0776586	0.0761624	0.0765635	0.0472236	0.0507845	0.024869	NA	NA	NA	NA	NA	NA	NA	NA	NA	NA	NA	NA
COX17	0.131747	0.137954	0.145762	-0.643306	-0.644974	-0.45801	-1.26198	-1.26198	-1.26198	0.0964501	0.102162	0.115761	-0.00464074	0.111519	-0.0185829	-0.243671	-0.00585826	-0.359333	0.228146	0.21888	0.215388
COX20	0.250376	0.255259	0.254194	0.29363	0.271216	0.315352	0.105356	0.121889	0.131552	0.129594	0.0861036	0.110796	0.159848	0.0356063	0.0958721	0.134027	0.212612	0.190126	0.196711	0.0597343	0.107412
COX4I1	0.712191	0.760111	0.718164	0.714155	0.706672	0.704009	0.60196	0.695717	0.630708	0.548572	0.570519	0.59611	0.583497	0.600747	0.594828	0.455961	0.396404	0.420068	0.453707	0.467842	0.482398
COX5A	0.120258	0.141036	0.147107	0.4728	0.491854	0.48586	0.309941	0.364468	0.324405	0.3707	0.392214	0.40034	0.287067	0.378309	0.376862	0.114836	0.131882	0.097325	0.206145	0.515557	0.247095
COX5B	0.126705	0.148184	0.155767	0.166864	0.15659	0.183046	-1.26198	-1.26198	-1.26198	0.359967	0.406968	0.413948	0.439002	0.406769	0.432597	0.326992	0.336608	0.333657	0.316821	0.314316	0.315887
COX6A1	0.278163	0.277787	0.23378	0.386471	0.412649	0.401447	0.138916	0.185541	0.143015	-1.26195	-1.26195	-1.26195	0.131191	0.197866	0.245423	0.20195	0.15196	0.0731848	-1.26192	0.192838	0.192355
COX6B1	0.392058	0.40861	0.404578	0.406775	0.391257	0.40768	0.270784	0.32253	0.270784	0.442266	0.470254	0.444164	0.322876	0.398506	0.385649	0.293342	0.282718	0.271734	0.313201	0.33986	0.318339
COX7A2	0.423129	0.375373	0.299375	0.248505	0.229518	0.249664	-1.26198	-1.26198	-1.26198	0.421134	0.410662	0.412588	0.403737	0.359815	0.383856	0.362757	0.411142	0.398506	0.366454	0.343831	0.341374
COX7A2L	-1.26197	-1.26197	-1.26197	-1.262	-1.262	-1.262	-0.0104893	0.0252636	-0.0322255	0.164281	0.169246	0.134583	0.0247069	0.131974	0.170139	0.148436	0.115631	0.130958	0.112878	0.148043	-0.00501924
COX7C	0.0613069	0.0558224	0.0656516	0.195188	0.183154	0.197299	-1.26198	-1.26198	-1.26198	NA	NA	NA	NA	NA	NA	NA	NA	NA	NA	NA	NA
CPEB4	-0.648087	-0.646497	-0.469269	0.131015	0.131618	0.14058	0.00195996	-0.0192451	-0.0383217	NA	NA	NA	NA	NA	NA	NA	NA	NA	NA	NA	NA
CPM	0.204041	0.202703	0.201772	0.138034	0.109899	0.13884	0.0336777	0.0502	0.0810939	NA	NA	NA	NA	NA	NA	NA	NA	NA	NA	NA	NA
CPNE1	0.584582	0.567011	0.567409	0.399412	0.404772	0.405033	0.387159	0.388702	0.401992	0.385877	0.399177	0.392214	0.409468	0.363171	0.380115	0.337368	0.326197	0.315017	0.309812	0.338767	0.318339
CPNE2	-1.26197	-1.26197	-1.26197	0.0351654	0.0315686	0.0356585	-1.2619	-1.26191	-1.26192	NA	NA	NA	NA	NA	NA	NA	NA	NA	NA	NA	NA
CPNE3	0.301837	0.300335	0.305078	0.257332	0.246404	0.260514	0.298837	0.302049	0.309127	0.447097	0.448091	0.452699	0.414478	0.414777	0.398952	0.326519	0.427616	0.38336	0.387568	0.332127	0.333657
CPOX	0.282903	0.282046	0.285882	0.306391	0.328755	0.318361	0.275336	0.258837	0.260247	0.226839	0.237854	0.248851	0.219139	0.130378	0.146738	0.301903	0.290857	0.286829	0.324516	0.302849	0.322985
CPPED1	0.00749177	0.0105561	-0.0174633	0.162989	0.166265	0.160784	0.0775843	0.0707172	0.0721038	0.241717	0.190126	0.208165	0.243796	0.25857	0.257053	0.207825	0.251094	0.184888	0.102559	0.0062614	0.143367
CPSF1	0.335419	0.3326	0.326654	0.264717	0.26611	0.26278	0.302049	0.298608	0.303547	0.261365	0.241947	0.252327	0.312766	0.278235	0.270088	0.280544	0.254189	0.242736	0.294723	0.292626	0.298484
CPSF2	0.409875	0.396706	0.397309	0.332106	0.336153	0.327728	0.37237	0.363239	0.365933	0.190751	0.164695	0.175683	0.205626	0.195967	0.217952	0.250297	0.293943	0.288458	0.122357	0.125406	0.0445189
CPSF3	0.389454	0.378449	0.376705	0.322959	0.320964	0.31519	0.333536	0.33586	0.337569	0.252526	0.260466	0.277779	0.237854	0.245767	0.223559	0.275898	0.22534	0.300038	0.278889	0.282048	0.2313
CPSF3L	0.214713	0.215934	0.216356	0.183874	0.191297	0.183874	0.20412	0.199885	0.200192	NA	NA	NA	NA	NA	NA	NA	NA	NA	NA	NA	NA
CPSF4	0.343808	0.342725	0.342369	0.286296	0.276848	0.281143	0.323317	0.310411	0.292968	0.171907	0.189381	0.166935	0.14619	0.103229	0.0974453	0.0857132	0.0903123	0.077703	-0.0157862	0.0307752	0.0710428
CPSF6	0.493525	0.485446	0.47999	0.417984	0.41114	0.417265	0.411486	0.417093	0.422477	0.41985	0.40241	0.42875	0.438279	0.387313	0.380657	0.459886	0.457863	0.462145	0.476908	0.404432	0.431908
CPSF7	0.330743	0.321601	0.326057	0.232684	0.234047	0.243449	0.312506	0.314681	0.312506	0.29382	0.305288	0.304265	0.301362	0.302569	0.281329	0.305612	0.288729	0.327847	0.418935	0.318121	0.378715
CPT1A	0.305861	0.308299	0.315436	0.0570741	0.0682288	0.0605411	0.186152	0.184626	0.177684	0.232365	0.255423	0.279895	0.224153	0.243309	0.219704	0.22475	0.183854	0.174633	0.1893	0.178753	0.158597
CPT2	0.312753	0.30302	0.303158	0.251174	0.245925	0.244681	0.225946	0.22615	0.23341	0.131191	0.128095	0.170067	0.237008	0.186279	0.184108	0.0836457	0.146984	0.103811	0.0997593	0.047526	0.0869897
CR1	0.289817	0.287163	0.276396	0.213278	0.212467	0.211317	0.28764	0.276668	0.296365	NA	NA	NA	NA	NA	NA	NA	NA	NA	NA	NA	NA
CRABP2	-1.26197	-1.26197	-1.26197	0.152387	0.169351	0.153895	0.375622	0.360181	0.388702	NA	NA	NA	NA	NA	NA	NA	NA	NA	NA	NA	NA
CRACR2A	0.159067	0.151885	0.160927	0.125729	0.128903	0.131926	-1.06488	-0.962897	-0.669857	NA	NA	NA	NA	NA	NA	NA	NA	NA	NA	NA	NA
CRADD	-0.649754	-0.45784	-0.448506	0.18793	0.179458	0.190898	-0.662067	-0.647105	-0.671069	NA	NA	NA	NA	NA	NA	NA	NA	NA	NA	NA	NA
CRAMP1	-0.648894	-0.643758	-0.643541	-0.655267	-0.667822	-0.661179	-0.246278	-0.348612	-0.253704	NA	NA	NA	NA	NA	NA	NA	NA	NA	NA	NA	NA
CRAT	-0.460282	-0.456018	-0.644847	-1.262	-1.262	-1.262	-1.26183	-1.1656	-0.962239	0.172769	0.102279	0.178976	0.209177	0.161634	0.140645	0.116027	0.037392	0.0982482	-1.26192	-0.0293214	-1.26191
CRBN	0.177113	0.173632	0.168176	0.0619406	0.03638	0.0509515	0.134213	0.137873	0.144813	0.149704	0.117244	0.145955	0.0676413	-1.26193	-1.26189	-0.650597	-1.26193	-1.26194	-0.0268194	-0.074545	-1.26191
CREB1	0.352019	0.384559	0.399267	0.219988	0.216674	0.21641	0.358025	0.348871	0.34398	0.271482	0.270517	0.289689	0.239786	0.291728	0.290143	0.0676413	0.192838	0.103649	0.247391	0.227638	0.222863
CREBBP	0.0595527	0.0470489	0.0506872	-0.0225268	-0.0113404	-0.0206295	0.128777	0.124413	0.129596	0.130868	0.118567	0.0365185	0.0975344	0.0793895	0.130786	0.0871314	0.0691608	0.0395828	-1.26192	0.0191843	-1.26191
CREBL2	0.165848	0.171426	0.168236	-1.262	-1.262	-1.262	-1.26198	-1.26198	-1.26198	NA	NA	NA	NA	NA	NA	NA	NA	NA	NA	NA	NA
CREBRF	0.0255157	0.0270142	0.0334145	-1.262	-1.262	-1.262	-1.26191	-1.26192	-1.26191	NA	NA	NA	NA	NA	NA	NA	NA	NA	NA	NA	NA
CRELD1	-1.26197	-1.26197	-1.26197	-1.26195	-1.26196	-1.26196	-0.25304	-0.351495	-0.268203	NA	NA	NA	NA	NA	NA	NA	NA	NA	NA	NA	NA
CRELD2	-0.00457799	0.024448	0.0433534	0.350987	0.347673	0.347112	0.341045	0.321485	0.319234	-0.0603207	-0.00622378	-1.26195	-0.0138976	0.108791	0.0814863	0.0946482	0.0920926	0.0989407	-0.0349153	-0.00163187	-1.26191
CRIP1	0.447888	0.529192	0.520076	0.853734	0.737846	0.796756	0.547389	0.572989	0.585067	0.540832	0.554791	0.576815	0.445333	0.620186	0.680836	0.324214	0.337145	0.335455	0.352798	0.380657	0.379283
CRIP2	0.0966059	0.101239	0.0862705	0.0945849	0.0787908	0.0777227	0.0156389	0.00762326	0.00378198	0.303814	0.289425	0.297053	0.344299	0.301234	0.299552	0.249723	0.284472	0.274109	0.0661273	0.14454	0.110179
CRK	0.177367	0.200149	0.191123	0.259137	0.271489	0.267629	0.234334	0.248101	0.244593	NA	NA	NA	NA	NA	NA	NA	NA	NA	NA	NA	NA
CRKL	0.329498	0.366458	0.382081	0.40893	0.412851	0.41168	0.436718	0.454843	0.431021	0.367868	0.363506	0.345785	0.371138	0.351528	0.365147	0.338302	0.324067	0.313641	0.30587	0.279055	0.300515
CRLF2	-1.26189	-1.26188	-1.26188	0.130169	0.142562	0.125498	0.0727128	0.0721038	0.0734417	NA	NA	NA	NA	NA	NA	NA	NA	NA	NA	NA	NA
CRLF3	0.639694	0.629334	0.639694	0.393748	0.413754	0.390974	0.526669	0.531809	0.543438	0.400094	0.418639	0.400094	0.470642	0.4047	0.396117	0.35365	0.361662	0.392946	0.282202	0.293671	0.279055
CRLS1	-0.558176	-0.559863	-0.358809	-0.857321	-0.669644	-0.858364	-0.0411194	-0.0564142	-0.0027033	NA	NA	NA	NA	NA	NA	NA	NA	NA	NA	NA	NA
CRMP1	0.198053	0.177684	0.175946	0.236067	0.217137	0.234933	0.0051717	0.0215914	0.000226745	NA	NA	NA	NA	NA	NA	NA	NA	NA	NA	NA	NA
CRNKL1	0.482237	0.480476	0.474862	0.31162	0.311514	0.305802	0.362168	0.353576	0.347231	0.137023	0.182686	0.177392	0.252526	0.194721	0.180706	0.205626	0.220453	0.208165	0.161634	0.178319	0.188228
CROCC	0.152451	0.141227	0.142764	0.188649	0.193386	0.189987	0.298608	0.297802	0.297932	0.376453	0.334551	0.39055	0.399655	0.361662	0.360847	0.323898	0.32996	0.322142	0.317191	0.344983	0.338302
CROT	0.252593	0.242741	0.247503	0.247603	0.255817	0.253773	0.185076	0.197629	0.206337	NA	NA	NA	NA	NA	NA	NA	NA	NA	NA	NA	NA
CRTAP	-1.26197	-1.26197	-1.26197	-1.16448	-1.26184	-1.16377	0.048867	0.0453316	0.0443956	NA	NA	NA	NA	NA	NA	NA	NA	NA	NA	NA	NA
CRTC1	-0.646358	-0.643116	-0.357168	-1.26197	-1.26197	-1.26196	0.0949445	0.106524	0.079275	0.175338	0.247519	0.240992	0.256838	0.0091946	0.00252057	0.0797768	0.27065	0.276203	0.551217	0.0308809	-0.0202665
CRTC2	-0.152642	-0.00737132	0.0104623	-0.962897	-0.665226	-0.665678	0.0577405	0.0756848	0.048582	0.126019	0.107891	0.045714	-0.0685041	-1.26193	0.0501638	-0.246801	-0.000896475	-1.26194	-1.26192	-1.26189	-1.26191
CRTC3	0.00387798	0.0659906	0.0739064	0.0168338	0.0241852	0.0306918	0.102117	0.127615	0.125865	0.0965337	0.109681	0.0101138	-0.0276931	0.0453665	0.0382876	-0.0469766	-1.26193	0.0613457	0.0534499	-1.26189	0.098629
CRY1	0.0719894	0.0642064	0.0667393	0.0406491	0.0377324	0.0385859	0.11519	0.0956791	0.0886548	NA	NA	NA	NA	NA	NA	NA	NA	NA	NA	NA	NA
CRYBG3	-1.26197	-1.26197	-1.26197	-1.26191	-1.2619	-1.2619	-1.26198	-1.26198	-1.26198	NA	NA	NA	NA	NA	NA	NA	NA	NA	NA	NA	NA
CRYL1	0.427959	0.430049	0.425875	0.140636	0.13557	0.126457	0.308399	0.315352	0.320753	0.270517	0.273528	0.269791	0.210287	0.270281	0.279329	0.177549	0.125603	0.109952	0.147755	-1.26189	-0.250542
CRYZ	0.152299	0.146976	0.150654	0.0911385	0.0847553	0.0791183	0.132636	0.136276	0.135235	0.513222	0.524738	0.492914	0.491379	0.473384	0.490321	0.566985	0.571171	0.572796	0.285151	0.331268	0.284935
CRYZL1	0.263349	0.256915	0.249583	0.176666	0.177278	0.179096	0.222203	0.227184	0.240511	0.0709049	0.103044	0.0996776	0.0693139	0.0877564	0.123496	0.141453	0.140557	0.157499	-1.26192	-1.26189	-1.26191
CS	0.675672	0.665539	0.650326	0.687504	0.681476	0.687504	0.649391	0.640418	0.676761	0.609896	0.636322	0.630022	0.54285	0.662088	0.614308	0.742055	0.545782	0.630993	0.723656	0.76913	0.636322
CSAD	0.0707172	0.0648557	0.0659213	-1.26194	-1.26193	-1.26194	-0.0287037	-0.0613927	-0.0255022	NA	NA	NA	NA	NA	NA	NA	NA	NA	NA	NA	NA
CSDE1	0.364867	0.365224	0.365608	0.4135	0.406523	0.410462	0.55856	0.551985	0.545632	0.138807	0.209003	0.190925	0.237282	0.217323	0.243309	0.371138	0.351724	0.364752	0.316024	0.314193	0.327648
CSE1L	0.462727	0.443985	0.447888	0.420709	0.427622	0.423129	0.423475	0.402489	0.402257	1.9054	0.391228	0.730545	2.32006	1.31381	0.759385	1.73954	2.74425	2.32006	0.630993	0.481242	1.833
CSGALNACT2	-0.159909	-0.152007	-0.0643703	-0.243255	-0.242418	-0.243255	-1.2619	-1.26188	-1.26189	NA	NA	NA	NA	NA	NA	NA	NA	NA	NA	NA	NA
CSK	0.585067	0.573609	0.559789	0.463346	0.449169	0.459383	0.436147	0.434065	0.439872	0.542115	0.537771	0.542115	0.515282	0.548572	0.508911	0.481557	0.438544	0.446847	0.526928	0.474367	0.469934
CSNK1A1	0.336536	0.336153	0.329913	0.325826	0.32867	0.324605	0.155295	0.144311	0.148813	0.173471	0.158043	0.187609	0.167217	0.114307	0.203248	0.157747	0.180779	0.191539	0.227236	0.18991	0.184783
CSNK1D	0.218662	0.21747	0.226537	0.209855	0.211918	0.214475	0.210686	0.201029	0.217295	NA	NA	NA	NA	NA	NA	NA	NA	NA	NA	NA	NA
CSNK1E	-0.874112	-0.671069	-0.767738	-0.668386	-0.861834	-0.674781	-0.255058	-0.0360828	-0.012086	NA	NA	NA	NA	NA	NA	NA	NA	NA	NA	NA	NA
CSNK1G1	0.197573	0.200303	0.195003	0.181853	0.186475	0.181521	0.0918159	0.09712	0.109837	NA	NA	NA	NA	NA	NA	NA	NA	NA	NA	NA	NA
CSNK1G2	-0.0122542	-0.00789822	-0.0136079	-0.245949	-0.357168	-0.242679	-0.643205	-0.656076	-0.656076	NA	NA	NA	NA	NA	NA	NA	NA	NA	NA	NA	NA
CSNK1G3	0.130545	0.12512	0.138125	0.0229026	-0.00508322	0.00217746	-1.26189	-1.2619	-1.26189	NA	NA	NA	NA	NA	NA	NA	NA	NA	NA	NA	NA
CSNK2A1	0.521633	0.515459	0.509141	0.48586	0.47779	0.4832	0.527835	0.53337	0.534017	0.332127	0.32065	0.317312	0.364542	0.332581	0.315449	0.429349	0.434099	0.450634	0.420845	0.391424	0.478107
CSNK2A2	0.381777	0.383822	0.380687	0.396562	0.401826	0.400177	0.391891	0.382223	0.392529	0.27236	0.27844	0.236479	0.303485	0.309451	0.289689	0.250762	0.269036	0.275068	0.32271	0.269442	0.277253
CSNK2B	0.290656	0.316352	0.317154	0.572311	0.591945	0.573609	0.758143	0.761234	0.76654	0.25857	0.251509	0.257425	0.196593	0.275732	0.255988	0.306497	0.283953	0.296152	0.27521	0.265354	0.254954
CSPP1	-0.668144	-0.662491	-0.662717	-1.26192	-1.26192	-1.26192	-1.26188	-1.26187	-1.26187	NA	NA	NA	NA	NA	NA	NA	NA	NA	NA	NA	NA
CSRNP1	-1.26186	-1.26185	-1.26183	-0.0322255	-0.0166829	-0.044156	-0.351495	-0.242919	-0.0566818	NA	NA	NA	NA	NA	NA	NA	NA	NA	NA	NA	NA
CSRP1	0.597661	0.593712	0.588651	0.508632	0.485646	0.488902	0.591945	0.575569	0.570454	0.420491	0.408803	0.410337	0.394485	0.397079	0.404059	0.312315	0.323383	0.293943	0.255551	0.274251	0.23162
CSRP2	-1.26197	-1.26197	-1.26197	-0.0437941	-0.00390394	-0.0319321	-1.26198	-1.26198	-1.26198	NA	NA	NA	NA	NA	NA	NA	NA	NA	NA	NA	NA
CSRP2BP	0.000226745	-0.0002206	-0.000328092	-0.348926	-0.360402	-0.349489	0.00261331	-0.00430797	-0.00288742	NA	NA	NA	NA	NA	NA	NA	NA	NA	NA	NA	NA
CST3	0.266467	0.284583	0.2785	0.146733	0.155847	0.147304	-1.26198	-1.26198	-1.26198	NA	NA	NA	NA	NA	NA	NA	NA	NA	NA	NA	NA
CST7	-1.26197	-1.26197	-1.26197	-0.00157988	-0.0162064	-0.00157988	-1.26198	-1.26198	-1.26198	NA	NA	NA	NA	NA	NA	NA	NA	NA	NA	NA	NA
CSTB	-1.26197	-1.26197	-1.26197	-0.00305374	0.0134906	0.0328813	0.0882111	0.168503	0.16047	0.703718	0.683881	0.65864	0.471808	0.551217	0.732254	0.404432	0.402625	0.383856	0.392946	0.433374	0.404059
CSTF1	0.398346	0.390673	0.388211	0.29763	0.301586	0.296877	0.365608	0.362533	0.369635	0.208361	0.199791	0.200281	0.261563	0.195669	0.254546	0.319775	0.241597	0.275898	0.236898	0.252989	0.205093
CSTF2	0.0484552	0.0776586	0.11263	0.175784	0.180403	0.182043	0.404578	0.426735	0.376176	0.221327	0.192315	0.202581	0.196143	0.267327	0.26252	0.21724	0.203002	0.17847	0.224382	0.236291	0.262318
CSTF2T	-0.0270604	0.0258525	0.0493264	0.0484552	0.0636084	0.051187	0.283351	0.282046	0.271407	0.106367	-0.242818	0.0352712	0.163777	0.0455814	0.108235	0.124445	0.119345	0.105078	0.109449	0.177392	0.149704
CSTF3	0.41597	0.407046	0.409352	0.316352	0.309855	0.311167	0.325078	0.314468	0.315908	0.207301	0.18498	0.193713	0.159757	0.233237	0.187524	0.276923	0.259155	0.232446	0.255423	0.216774	0.203902
CTBP1	0.400332	0.406226	0.400752	0.373394	0.368951	0.368951	0.339596	0.338476	0.349258	0.370212	0.338302	0.363656	0.309451	0.354169	0.338302	0.301641	0.247095	0.21888	0.349029	0.360703	0.378309
CTBS	-1.26197	-1.26197	-1.26197	-0.360986	-0.263904	-0.452793	-1.26198	-1.26198	-1.26198	0.125603	0.133329	0.104069	0.142575	0.152305	0.169111	-0.0575219	0.0405352	-1.26194	-0.246608	-1.26189	-1.26191
CTC1	0.14328	0.135517	0.131618	0.219168	0.214848	0.217073	0.153993	0.151725	0.161374	NA	NA	NA	NA	NA	NA	NA	NA	NA	NA	NA	NA
CTCF	0.404578	0.393383	0.378325	0.327051	0.330891	0.325753	0.345087	0.341045	0.346081	0.269036	0.286251	0.284277	0.289809	0.323162	0.321615	0.264916	0.279895	0.265552	0.105589	0.137763	0.137632
CTDNEP1	0.0306918	0.0238449	0.0255157	-0.0113404	-0.00169754	-0.00305374	0.107156	0.0953628	0.0843348	NA	NA	NA	NA	NA	NA	NA	NA	NA	NA	NA	NA
CTDP1	0.302387	0.294136	0.293735	0.228961	0.220961	0.226468	0.243526	0.238126	0.238434	0.0270148	0.123842	0.110361	0.162954	0.143919	0.15668	0.149704	0.0704306	0.0350234	0.0133565	0.0033107	0.0387098
CTDSP1	0.0866663	0.0876275	0.0876275	0.115713	0.128204	0.122443	0.0252636	0.0186401	0.014316	NA	NA	NA	NA	NA	NA	NA	NA	NA	NA	NA	NA
CTDSPL2	0.303677	0.292788	0.292877	0.280688	0.291033	0.284846	0.297091	0.303231	0.308299	0.0733571	0.152681	0.0785545	0.0825181	0.159848	0.139102	-1.26195	0.0612334	0.0406582	0.152074	0.136225	0.142273
CTH	-1.26197	-1.26197	-1.26197	-1.26195	-1.26196	-1.26196	-1.2619	-1.26189	-0.661414	NA	NA	NA	NA	NA	NA	NA	NA	NA	NA	NA	NA
CTLA4	-1.26197	-1.26197	-1.26197	0.0966842	0.0998336	0.0981676	-1.26188	-1.26188	-1.2619	-1.26195	-1.26195	-1.26195	-1.26194	-1.26193	-1.26189	-1.26195	-1.26193	-0.0193118	0.0915079	0.031756	0.0532786
CTNNA1	-0.0258956	-0.0497877	-0.252666	0.166101	0.157172	0.160551	0.107083	0.11192	0.129191	NA	NA	NA	NA	NA	NA	NA	NA	NA	NA	NA	NA
CTNNA2	-1.26185	-1.26185	-1.26184	-0.151807	-0.242679	-0.239409	-0.85905	-0.85938	-0.65669	NA	NA	NA	NA	NA	NA	NA	NA	NA	NA	NA	NA
CTNNB1	0.040983	0.0385859	0.0180847	-1.26198	-1.26198	-1.26198	-1.26187	-1.26187	-1.26187	NA	NA	NA	NA	NA	NA	NA	NA	NA	NA	NA	NA
CTNNBL1	0.402367	0.396562	0.394453	0.360053	0.36231	0.360053	0.38607	0.374404	0.369371	0.297053	0.296152	0.2728	0.35037	0.271482	0.276923	0.347231	0.328618	0.292076	0.251509	0.304982	0.30994
CTPS1	0.329399	0.324605	0.318291	0.391751	0.378325	0.38919	0.413984	0.413754	0.432273	0.183112	0.184206	0.181039	0.165863	0.204165	0.263509	0.376453	0.335455	0.326367	0.410337	0.426794	0.453273
CTPS2	0.372646	0.358992	0.36231	0.257406	0.246003	0.250625	0.275898	0.264082	0.272969	0.00867689	-0.0355319	0.0184173	-0.0207506	-0.0547994	0.0081399	-1.26195	-0.354692	-1.26194	-1.26192	-1.26189	-1.26191
CTR9	0.315352	0.305502	0.306122	0.205649	0.209546	0.208967	0.288824	0.282628	0.289663	0.186948	0.189255	0.197776	0.204742	0.161892	0.22475	0.261365	0.311997	0.271035	0.265849	0.270088	0.248604
CTSA	0.214099	0.219503	0.214166	0.336776	0.336536	0.347673	0.17523	0.188227	0.169563	0.103757	0.114955	0.0988073	-1.26194	0.0486968	0.0810605	-0.150209	-0.0227133	0.0014103	0.180215	0.182201	0.111806
CTSB	0.290171	0.303231	0.293318	0.429498	0.437299	0.45536	0.370529	0.379723	0.396706	0.386695	0.39406	0.394824	0.381285	0.412588	0.389402	0.239366	0.271163	0.244083	0.235255	0.234269	0.234389
CTSC	0.199557	0.188867	0.174044	0.257703	0.257703	0.253679	0.18598	0.206414	0.185668	0.242572	0.254546	0.229637	0.214574	0.286829	0.279207	0.152465	0.148325	0.100809	0.0455814	0.162541	0.0233938
CTSD	0.331801	0.328081	0.329319	0.47779	0.486652	0.507087	0.300163	0.28747	0.27738	0.399655	0.41985	0.421134	0.378498	0.404432	0.401404	0.408559	0.388107	0.393326	0.47098	0.439453	0.437959
CTSL	-1.26197	-1.26197	-1.26197	-1.26197	-1.26197	-1.26197	-0.257507	-0.0764634	-0.0668219	NA	NA	NA	NA	NA	NA	NA	NA	NA	NA	NA	NA
CTSO	-1.26197	-1.26197	-1.26197	-1.26186	-1.26187	-1.26186	-1.26198	-1.26198	-1.26198	NA	NA	NA	NA	NA	NA	NA	NA	NA	NA	NA	NA
CTSS	0.438599	0.436608	0.449169	0.254672	0.266467	0.256655	0.371107	0.337679	0.355486	0.199102	0.167436	0.204898	0.275732	0.249155	0.270408	0.249055	0.175404	0.221017	0.142958	0.213086	0.235255
CTSW	-0.26035	-0.154961	-0.23925	0.283504	0.288053	0.292169	-1.26198	-1.26198	-1.26198	NA	NA	NA	NA	NA	NA	NA	NA	NA	NA	NA	NA
CTSZ	0.184569	0.206337	0.206503	0.352518	0.354046	0.359236	0.352125	0.355242	0.371832	0.0816939	-0.46598	0.0524522	0.171638	0.161507	0.191332	-0.661334	-1.26193	-0.148998	-0.016768	0.0709894	0.0256419
CTU1	0.156273	0.153047	0.152169	0.174118	0.175155	0.179654	0.188973	0.185592	0.194671	NA	NA	NA	NA	NA	NA	NA	NA	NA	NA	NA	NA
CTU2	0.247006	0.242475	0.24575	0.199473	0.20579	0.199078	0.320858	0.316258	0.316093	NA	NA	NA	NA	NA	NA	NA	NA	NA	NA	NA	NA
CUEDC2	-1.26197	-1.26197	-1.26197	-1.06514	-0.963106	-0.660533	-1.26198	-1.26198	-1.26198	NA	NA	NA	NA	NA	NA	NA	NA	NA	NA	NA	NA
CUL1	0.30705	0.306122	0.305181	0.322887	0.327728	0.325589	0.305715	0.298029	0.300486	0.208063	0.192475	0.198769	0.147656	0.172676	0.185906	0.277512	0.194626	0.243537	0.267003	0.156317	0.208769
CUL2	0.238658	0.238887	0.23675	0.301231	0.305398	0.303098	0.30876	0.301936	0.315273	0.24678	0.255551	0.248498	0.212735	0.256423	0.232972	0.306246	0.241334	0.254954	0.224517	0.244379	0.237982
CUL3	0.419037	0.412286	0.410837	0.398541	0.393929	0.396041	0.380582	0.377379	0.383027	0.355603	0.338104	0.342409	0.33926	0.3225	0.311339	0.269791	0.280861	0.306619	0.32831	0.325933	0.325933
CUL4A	0.140383	0.133757	0.137782	0.216297	0.217395	0.213465	0.20186	0.212877	0.222653	0.202581	0.181039	0.195967	0.0927772	0.0944137	0.098108	0.222577	0.170719	0.134161	0.286129	0.307304	0.30587
CUL4B	0.342993	0.324892	0.332811	0.282903	0.275667	0.279342	0.335419	0.325589	0.32961	0.25948	0.282718	0.290251	0.256298	0.267704	0.288051	0.254678	0.356307	0.209997	0.312178	0.304076	0.338459
CUL5	0.338	0.335655	0.332106	0.226914	0.223076	0.22615	0.301586	0.295495	0.302856	0.210722	0.19586	0.225002	0.187363	0.216141	0.198906	0.224878	0.182686	0.17064	0.128761	0.0573054	0.110044
CUL7	-1.26197	-1.26197	-1.26197	-1.26199	-1.26198	-1.26199	-1.26189	-1.26189	-1.26191	0.0900437	0.00416555	0.0219087	0.134312	0.0625543	0.0989407	0.127574	0.144021	0.0305545	0.07275	0.0977662	0.115893
CUTA	-0.24058	-0.556217	-0.668575	0.0837323	0.076417	0.0967443	-1.26198	-1.26198	-1.26198	0.242736	0.25937	0.247192	0.243188	0.250518	0.229325	0.304508	0.19537	0.207162	0.262429	0.21187	0.236479
CUTC	0.250214	0.281462	0.257229	0.00241868	0.00698856	0.00206296	0.134007	0.127148	0.13695	0.294473	0.315573	0.301234	0.380657	0.301504	0.337592	0.251866	0.301139	0.290707	0.210287	0.19797	0.237551
CUX1	0.0885691	0.089989	0.0886548	0.138609	0.141675	0.135765	0.16778	0.163151	0.168567	NA	NA	NA	NA	NA	NA	NA	NA	NA	NA	NA	NA
CWC15	0.304109	0.349117	0.359087	0.339848	0.334802	0.345405	0.456923	0.442373	0.425665	0.173645	0.16342	0.220223	0.166935	0.191332	0.155538	0.167035	0.175338	0.169342	0.200456	0.186148	0.170213
CWC22	0.271686	0.266748	0.271617	0.246903	0.249583	0.243064	0.319684	0.31709	0.310754	0.09599	0.0865595	0.119739	0.119233	0.14619	0.144202	0.162304	0.16966	0.16599	0.183112	0.20247	0.207665
CWC25	0.23341	0.233346	0.232228	0.149219	0.158232	0.150654	0.215811	0.209324	0.20186	NA	NA	NA	NA	NA	NA	NA	NA	NA	NA	NA	NA
CWC27	0.210414	0.202565	0.206066	0.215221	0.227116	0.215991	0.320964	0.308495	0.304337	0.187878	0.191151	0.185742	0.154325	0.121964	0.147966	0.170848	0.196908	0.162383	0.126827	0.0484424	0.146738
CWF19L1	0.333974	0.32761	0.32961	0.236936	0.236275	0.233028	0.308299	0.296365	0.293409	0.234121	0.216888	0.206544	0.287535	0.221457	0.235621	0.180862	0.174232	0.234697	0.147086	0.16288	0.108685
CWF19L2	0.133073	0.128833	0.131164	0.00229451	0.0157395	0.00269397	0.128559	0.122599	0.118305	NA	NA	NA	NA	NA	NA	NA	NA	NA	NA	NA	NA
CXCR1	-1.26197	-1.26197	-1.26197	0.033827	0.0541578	0.0502	-1.26198	-1.26198	-1.26198	NA	NA	NA	NA	NA	NA	NA	NA	NA	NA	NA	NA
CXCR3	-1.26197	-1.26197	-1.26197	0.0240835	0.0263375	0.0246738	-1.26186	-1.26187	-1.26188	NA	NA	NA	NA	NA	NA	NA	NA	NA	NA	NA	NA
CXCR4	-1.26197	-1.26197	-1.26197	-1.26197	-1.26197	-1.26198	-1.26198	-1.26198	-1.26198	0.274251	0.255988	0.253806	0.306072	0.250297	0.289238	-1.26195	-0.0187528	-0.243113	0.023741	0.0359092	0.094001
CXorf38	0.246404	0.24368	0.233346	0.187398	0.189092	0.183222	0.0538934	0.0607333	0.0720469	NA	NA	NA	NA	NA	NA	NA	NA	NA	NA	NA	NA
CXorf40B	-0.0454533	-0.0638975	-0.0504177	-1.07451	-1.06951	-1.26186	-1.26198	-1.26198	-1.26198	NA	NA	NA	NA	NA	NA	NA	NA	NA	NA	NA	NA
CXorf56	0.29902	0.289143	0.299166	0.232757	0.240589	0.230364	0.280273	0.268718	0.263973	-1.26195	-0.0343344	-1.26195	-1.26194	-1.26193	-1.26189	-1.26195	-1.26193	-1.26194	-1.26192	-1.26189	-1.26191
CXXC1	0.317834	0.31218	0.311841	0.247217	0.242541	0.241407	0.215433	0.212467	0.214475	0.234269	0.236719	0.234578	0.244083	0.286129	0.212133	0.140645	0.177255	0.131299	0.098358	0.134516	0.11166
CYB561D2	0.322887	0.336291	0.309767	0.251559	0.249755	0.249284	0.304808	0.311943	0.32253	0.155373	0.147887	0.164082	0.235375	0.185142	0.217068	0.144021	0.128276	0.111269	0.0993742	-1.26189	0.128276
CYB5A	0.308576	0.358151	0.356814	0.829181	0.824608	0.842894	0.534321	0.584582	0.537808	0.162633	0.162954	0.166095	0.0873416	0.209279	0.184567	0.105185	0.104584	0.120019	0.157161	0.180543	0.177958
CYB5B	0.230034	0.257229	0.24793	0.568166	0.614791	0.600097	0.253535	0.277697	0.257627	0.313201	0.301903	0.32065	0.28161	0.193819	0.204165	0.275618	0.355873	0.337368	0.137763	0.0970493	0.183448
CYB5R1	0.304337	0.306855	0.308111	0.160621	0.155467	0.153229	0.0512694	0.058765	0.0604582	0.340967	0.351218	0.376862	0.252217	0.306497	0.321106	0.234389	0.235375	0.262614	0.220378	0.312178	0.233198
CYB5R3	0.577196	0.570894	0.569675	0.491854	0.500638	0.48713	0.450629	0.450813	0.452402	0.39268	0.389789	0.397535	0.416258	0.381589	0.391006	0.469131	0.441861	0.410038	0.396868	0.359056	0.339474
CYB5R4	0.181521	0.178957	0.180591	0.181922	0.180004	0.197629	0.118398	0.115483	0.114117	NA	NA	NA	NA	NA	NA	NA	NA	NA	NA	NA	NA
CYBA	0.0858327	0.0725187	0.0778959	0.205087	0.234334	0.218372	0.29518	0.305294	0.318437	0.140839	0.150115	0.158984	0.176138	0.173921	0.158597	0.119136	0.122028	0.101997	-1.26192	-0.0262861	-1.26191
CYBB	-0.858767	-0.96373	-0.963541	-1.262	-1.262	-1.262	0.149761	0.0965586	0.143778	-1.26195	0.0550206	-0.0465297	-0.149279	0.018295	-1.26189	-1.26195	-1.26193	-1.26194	-1.26192	-1.26189	-1.26191
CYBC1	0.643172	0.650326	0.655138	0.46539	0.474211	0.468	0.55078	0.544519	0.556401	0.235711	0.225002	0.237197	0.00971662	0.098358	0.108169	0.202685	0.121661	0.122591	0.114307	0.140217	0.130378
CYC1	0.382357	0.407819	0.401016	0.367661	0.382223	0.372516	0.389454	0.417265	0.417828	0.39406	0.396404	0.400766	0.250405	0.293943	0.332927	0.269338	0.320964	0.298484	0.398952	0.306619	0.276203
CYCS	1.1916	1.17071	1.19664	0.73396	0.638917	0.685734	0.363339	0.407362	0.393264	0.267584	0.233198	0.272216	0.189462	0.227864	0.212475	0.3982	0.314019	0.362757	0.373904	0.378715	0.344601
CYFIP1	0.419307	0.41566	0.417647	0.375373	0.365933	0.374293	0.324892	0.324973	0.33191	0.131882	0.152074	0.139777	0.147392	0.179455	0.153852	-1.26195	0.0165138	-0.165744	-1.26192	-1.26189	-1.26191
CYFIP2	0.177684	0.187277	0.195419	0.125424	0.120004	0.130877	0.04301	0.0347355	0.0508738	0.46519	0.466922	0.458476	0.467289	0.434099	0.452181	0.340061	0.326367	0.371968	0.375236	0.374225	0.403325
CYHR1	-1.26197	-1.26197	-1.26197	-1.26196	-1.26195	-1.26195	-1.26198	-1.26198	-1.26198	NA	NA	NA	NA	NA	NA	NA	NA	NA	NA	NA	NA
CYLD	0.307627	0.300895	0.299812	0.233851	0.229337	0.230685	0.198255	0.199557	0.210414	0.167556	0.185521	0.170213	0.258476	0.200026	0.185381	-0.362131	0.0146129	-0.00266512	-0.00702491	0.0220827	-0.0536189
CYP20A1	0.131552	0.127148	0.126233	0.159067	0.154758	0.161945	0.229066	0.220677	0.225313	0.229932	0.238821	0.184108	0.272101	0.253295	0.220719	0.226473	0.126905	0.215042	0.159283	0.246957	0.140557
CYP2D6	0.113511	0.100404	0.108415	-1.262	-1.262	-1.262	0.0342323	0.02651	-0.0061859	NA	NA	NA	NA	NA	NA	NA	NA	NA	NA	NA	NA
CYP2S1	0.274577	0.286763	0.281143	-0.00542838	-0.0174633	-0.0129332	0.180591	0.179717	0.1737	NA	NA	NA	NA	NA	NA	NA	NA	NA	NA	NA	NA
CYP4F8	-1.26197	-1.26197	-1.26197	0.027669	0.0217814	0.0250588	-1.26185	-1.26184	-1.26186	NA	NA	NA	NA	NA	NA	NA	NA	NA	NA	NA	NA
CYP51A1	0.102898	0.0934314	0.0788816	0.369787	0.35336	0.365933	0.387043	0.35336	0.362412	-1.26195	-1.26195	-1.26195	-1.26194	-1.26193	-1.26189	-1.26195	-1.26193	-1.26194	-1.26192	-0.0397628	-0.0213768
CYTH1	0.39587	0.391891	0.392689	0.425494	0.423841	0.420918	0.278231	0.263659	0.276297	0.356726	0.364069	0.347231	0.350466	0.311339	0.319245	0.339474	0.382354	0.415238	0.318521	0.32606	0.296098
CYTH2	0.166028	0.160004	0.163719	0.227337	0.227523	0.230752	0.128418	0.130769	0.135876	-0.447058	-1.26195	-1.26195	-1.26194	0.0694165	-1.26189	0.0127267	-1.26193	0.0212334	0.0371318	0.112878	-0.241511
CYTH3	0.140636	0.146449	0.146293	-1.262	-1.262	-1.262	-1.26198	-1.26198	-1.26198	NA	NA	NA	NA	NA	NA	NA	NA	NA	NA	NA	NA
CYTH4	0.326245	0.325673	0.320165	0.274411	0.273622	0.276751	0.152169	0.153842	0.158232	0.0147365	-1.26195	0.0659293	0.0120146	0.0147365	-1.26189	-0.252948	0.0570306	0.0754887	-1.26192	-1.26189	-1.26191
CYTIP	0.298725	0.295863	0.287785	0.381048	0.380687	0.384016	0.220844	0.221869	0.242045	0.10282	0.141319	0.148043	0.13586	-0.241511	0.067093	0.184659	0.16946	0.196305	0.0106147	0.025061	0.147966
D2HGDH	-0.0071929	-0.00226897	-0.0224074	-0.649564	-0.85938	-0.655665	-1.26188	-1.26188	-1.26187	-0.0193118	-0.244755	-0.674522	-0.669147	-0.488205	-1.26189	-1.26195	-1.26193	-1.26194	-1.26192	-1.26189	-1.26191
DAAM1	-0.0112266	-0.0174633	-0.0130557	-1.26183	-0.964663	-0.959789	-0.468243	-0.645118	-0.45801	NA	NA	NA	NA	NA	NA	NA	NA	NA	NA	NA	NA
DAAM2	0.369499	0.368768	0.379522	0.317834	0.284657	0.302049	0.390052	0.367661	0.354945	NA	NA	NA	NA	NA	NA	NA	NA	NA	NA	NA	NA
DAD1	0.604205	0.561404	0.551985	0.470968	0.527004	0.476783	0.572989	0.576006	0.554327	0.251866	0.244478	0.273652	0.269036	0.248142	0.243188	0.230577	0.252628	0.218043	0.294473	0.263155	0.238236
DAG1	-1.26186	-1.26186	-1.26186	-1.26195	-1.26196	-1.26195	-0.856375	-0.673737	-0.76587	NA	NA	NA	NA	NA	NA	NA	NA	NA	NA	NA	NA
DAGLB	-1.26197	-1.26197	-1.26197	-1.26198	-1.26199	-1.26199	-0.645496	-0.471873	-0.355969	NA	NA	NA	NA	NA	NA	NA	NA	NA	NA	NA	NA
DALRD3	-0.0346961	-0.0452966	-0.151045	0.0730903	0.068521	0.0678885	0.0475	0.0559502	0.0756848	NA	NA	NA	NA	NA	NA	NA	NA	NA	NA	NA	NA
DAP	-1.26197	-1.26197	-1.26197	0.18766	0.214245	0.204745	-1.26198	-1.26198	-1.26198	NA	NA	NA	NA	NA	NA	NA	NA	NA	NA	NA	NA
DAP3	0.258603	0.256299	0.25536	0.2409	0.24661	0.238434	0.261108	0.261826	0.252177	0.0642772	0.131487	0.0772978	0.0588188	0.0532786	0.0904089	0.143838	0.134161	0.212851	0.263509	0.294473	0.258008
DAPK2	-1.26197	-1.26197	-1.26197	0.0950936	0.10526	0.108201	-1.26191	-1.26192	-1.26191	NA	NA	NA	NA	NA	NA	NA	NA	NA	NA	NA	NA
DAPK3	0.0590964	0.0594713	0.0582649	-0.0397779	-0.259813	-0.0500683	0.00926937	0.000954436	0.0242755	NA	NA	NA	NA	NA	NA	NA	NA	NA	NA	NA	NA
DAPL1	0.528176	0.547389	0.567011	-1.262	-1.262	-1.262	-1.26198	-1.26198	-1.26198	NA	NA	NA	NA	NA	NA	NA	NA	NA	NA	NA	NA
DAPP1	0.142764	0.141329	0.134696	0.108718	0.11061	0.107841	0.00698856	-0.00315277	0.01335	-1.26195	-0.658308	-1.26195	-0.65175	-0.0558366	-0.00266512	-0.0397628	0.0684929	-1.26194	0.0826237	0.0187774	0.0941378
DARS1	0.820396	0.797924	0.796756	0.77351	0.756922	0.747794	0.742114	0.748847	0.796756	NA	NA	NA	NA	NA	NA	NA	NA	NA	NA	NA	NA
DARS2	0.140821	0.135819	0.136762	0.0151609	0.0146652	0.00387798	0.0932556	0.0913326	0.0909064	0.262568	0.28778	0.31257	0.247903	0.247095	0.247391	0.247597	0.30224	0.315322	0.257425	0.212988	0.264346
DAXX	0.230364	0.218662	0.242925	0.0918159	0.0985861	0.0987234	0.202791	0.201683	0.195545	0.21141	0.196824	0.198906	0.233095	0.166935	0.18899	0.142273	0.197492	0.107996	0.0529737	0.0581073	0.0995759
DAZAP1	0.562177	0.625921	0.613994	0.524475	0.548137	0.532541	0.492786	0.524867	0.515948	0.410904	0.413948	0.404059	0.36387	0.40596	0.436121	0.419365	0.41985	0.424834	0.331063	0.347573	0.347573
DBI	0.260015	0.300419	0.305715	0.412851	0.362412	0.404772	-1.26198	-1.26198	-1.26198	0.599417	0.600747	0.592639	0.413219	0.409255	0.429901	0.27844	0.281501	0.263603	0.414478	0.398506	0.412889
DBNL	0.402489	0.493248	0.500927	0.635498	0.646579	0.632616	0.622527	0.617335	0.633888	0.554791	0.562548	0.577734	0.550642	0.682312	0.687041	0.478107	0.458476	0.442266	0.464208	0.482783	0.471808
DBR1	0.340794	0.33191	0.336776	0.252723	0.252525	0.250214	0.30302	0.304337	0.300895	0.287673	0.28161	0.257652	0.23712	0.261867	0.291728	0.264506	0.154218	0.171033	0.188458	0.262794	0.339081
DBT	0.327501	0.325364	0.329152	0.166214	0.147304	0.16184	0.187331	0.169428	0.172835	0.220053	0.25857	0.234389	0.265725	0.237982	0.241459	0.215042	0.267972	0.237008	0.192731	0.147966	0.18601
DCAF1	0.264082	0.253773	0.257332	0.184626	0.176806	0.185541	0.214656	0.211486	0.210004	0.164439	0.109087	0.165509	0.18601	0.138465	0.216774	0.190217	0.122393	0.119739	0.158043	0.095197	0.226029
DCAF10	0.0652704	0.0800742	0.0800118	0.224221	0.236936	0.222289	0.420468	0.434295	0.43554	NA	NA	NA	NA	NA	NA	NA	NA	NA	NA	NA	NA
DCAF11	0.165931	0.162556	0.16829	0.0427895	0.0561383	0.0414689	0.134959	0.149655	0.146733	-0.770353	-0.560395	-0.646244	-0.17178	-0.0438377	0.0508441	-1.26195	-1.26193	-1.26194	-1.26192	-1.26189	-1.26191
DCAF12	-1.26197	-1.26197	-1.26197	-1.26183	-1.26185	-1.16499	0.0861965	0.0884154	0.0944328	NA	NA	NA	NA	NA	NA	NA	NA	NA	NA	NA	NA
DCAF13	0.324605	0.317386	0.316093	0.290171	0.279899	0.283023	0.401826	0.39587	0.393383	0.0308809	0.0460313	0.0108857	0.157094	0.107152	0.150997	0.213262	0.157404	0.167684	0.143108	0.199693	0.132839
DCAF15	-0.445482	-0.463039	-0.451952	0.0775843	0.0487453	0.06744	0.278433	0.257008	0.255445	NA	NA	NA	NA	NA	NA	NA	NA	NA	NA	NA	NA
DCAF4	0.00698856	0.0051717	0.00897746	-1.2619	-1.26188	-1.26191	0.0470489	0.0447044	0.03183	NA	NA	NA	NA	NA	NA	NA	NA	NA	NA	NA	NA
DCAF5	0.0990825	0.0937057	0.09762	0.140516	0.148461	0.145222	0.040567	0.0381021	0.0389156	NA	NA	NA	NA	NA	NA	NA	NA	NA	NA	NA	NA
DCAF7	0.30939	0.306234	0.309241	0.247006	0.228862	0.236211	0.264082	0.262486	0.268137	0.077703	0.0805507	0.0172771	0.257425	0.243188	0.239505	0.120631	0.136917	0.121188	0.0292248	0.146512	0.123179
DCAF8	0.246903	0.240398	0.23788	0.205298	0.20412	0.203203	0.159942	0.154517	0.155767	-0.039561	0.053743	-0.460731	-0.012817	0.0014103	0.00233538	-0.0240077	0.125519	0.0157069	-1.26192	-1.26189	-0.0258156
DCAKD	0.171255	0.173784	0.168986	0.191418	0.21102	0.196004	0.215991	0.216955	0.228429	-0.460731	-1.1645	-0.0391906	0.00534983	0.0770521	0.0684929	-1.26195	-0.249384	-0.0372119	-0.0536189	-1.26189	-0.0129788
DCK	0.271058	0.264082	0.263266	0.382081	0.388702	0.374543	0.309241	0.297932	0.311316	0.295895	0.294304	0.310571	0.279055	0.251509	0.230577	0.257652	0.259609	0.254189	0.183854	0.228546	0.234269
DCP1A	0.0938697	0.108242	0.106028	0.208458	0.203496	0.208175	0.249985	0.255747	0.261699	0.192388	0.103554	0.175238	-0.00790481	0.106781	0.15113	0.261023	0.215938	0.252989	0.334174	0.280453	0.271482
DCP1B	-0.0607326	-0.0336601	-0.0268738	-0.151353	-0.241974	-0.245134	0.0930194	0.0966842	0.084413	-0.0583453	0.0117673	-0.016768	-0.651326	-1.26193	-1.26189	0.0874754	0.0441335	-0.00202748	-1.26192	-1.26189	0.0187774
DCP2	0.199473	0.196004	0.203496	0.113511	0.1055	0.106753	0.111858	0.0924823	0.0815345	NA	NA	NA	NA	NA	NA	NA	NA	NA	NA	NA	NA
DCPS	0.58226	0.596523	0.598221	0.430859	0.427787	0.425875	0.429666	0.419917	0.4375	0.394661	0.385877	0.409763	0.299552	0.342187	0.342791	0.443242	0.356486	0.336221	0.397535	0.355603	0.388107
DCTD	-1.26197	-1.26197	-1.26197	-1.262	-1.262	-1.262	-0.465698	-0.251286	-0.670253	-0.249665	0.0895112	0.0519417	0.128964	0.0525638	0.0514307	-0.0666885	0.0435689	0.114416	0.107152	-1.26189	-1.26191
DCTN1	0.366156	0.359356	0.365933	0.400332	0.402257	0.402966	0.356077	0.347463	0.350699	0.420845	0.437666	0.437666	0.447837	0.410662	0.458476	0.402238	0.422726	0.398744	0.360502	0.351218	0.380657
DCTN2	0.15969	0.22567	0.253166	0.480904	0.479719	0.481679	0.475255	0.480666	0.4832	0.403737	0.394485	0.41219	0.363656	0.366053	0.369367	0.389566	0.466575	0.406146	0.537771	0.461131	0.487246
DCTN3	0.292251	0.31664	0.307901	0.251789	0.25536	0.25346	0.250057	0.269497	0.242233	0.139102	-1.26195	0.117576	0.0348959	0.135778	0.114955	-0.0193118	-0.0365076	-0.0436556	0.0962059	0.0993742	0.0332121
DCTN4	0.27214	0.269267	0.262717	0.302942	0.307158	0.310129	0.306391	0.311095	0.324892	0.191648	0.150667	0.158743	0.208769	0.171033	0.19293	0.197589	0.261124	0.236635	0.157094	0.127264	0.194626
DCTN5	0.280937	0.276497	0.28314	0.234407	0.217241	0.227902	0.124834	0.121783	0.117321	-0.698283	-0.681345	-0.669729	-0.240746	-0.0131798	-0.0403441	0.0445189	-0.154491	-0.0416808	0.156987	0.201818	0.100809
DCTN6	0.123767	0.16047	0.170294	0.256378	0.282361	0.270865	0.204796	0.215884	0.20993	NA	NA	NA	NA	NA	NA	NA	NA	NA	NA	NA	NA
DCTPP1	-1.26197	-1.26197	-1.26197	0.134326	0.150949	0.145276	-1.26198	-1.26198	-1.26198	0.182686	0.145825	0.187314	-0.648712	-1.26193	-1.26189	0.0310252	-0.452102	0.0256419	0.31772	0.264916	0.281805
DCUN1D1	0.388834	0.4061	0.40517	0.276064	0.260668	0.269793	0.249284	0.254854	0.258913	0.162799	0.189661	0.213832	0.221786	0.220968	0.226839	0.102162	0.18498	0.178878	0.110669	0.132158	0.116328
DCUN1D2	0.14161	0.162499	0.152219	0.0437364	0.0333409	0.0409183	0.0580551	0.044782	0.0515583	NA	NA	NA	NA	NA	NA	NA	NA	NA	NA	NA	NA
DCUN1D3	-0.245265	-0.15923	-0.0597262	0.395132	0.40598	0.399412	-1.26198	-1.26198	-1.26198	NA	NA	NA	NA	NA	NA	NA	NA	NA	NA	NA	NA
DCUN1D5	0.251485	0.244758	0.23194	0.214848	0.207889	0.215061	0.247603	0.238289	0.245629	-1.26195	-1.26195	-0.86002	0.102279	-1.26193	-1.26189	-1.26195	0.105185	0.00971662	0.133013	0.109858	0.07507
DCXR	-0.0372075	-0.0260739	-0.152007	0.241664	0.243971	0.235617	0.00154222	-0.0236659	-0.00846905	0.437959	0.430823	0.43677	0.429901	0.46312	0.441861	0.429609	0.386926	0.338104	0.348411	0.335455	0.3994
DDA1	0.0351654	0.079275	0.074938	0.260514	0.245835	0.271686	-1.26198	-1.26198	-1.26198	0.0300995	-0.040698	-1.26195	-0.356772	-0.0024716	-0.0270021	-0.0701338	-1.26193	-0.450997	0.087185	0.000558837	0.0401596
DDAH2	-1.26197	-1.26197	-1.26197	-0.642513	-1.26183	-0.681777	0.0471195	0.0443199	0.0400771	0.0908767	0.125797	0.15196	0.0500289	-0.0673684	0.0859604	0.131389	-1.26193	0.0441335	0.215388	0.177549	0.209003
DDB1	0.500331	0.498393	0.493525	0.448228	0.43688	0.441477	0.491854	0.48523	0.493525	0.501371	0.492914	0.515557	0.553152	0.520466	0.515982	0.560968	0.478832	0.523583	0.520039	0.475352	0.49251
DDB2	0.262424	0.258326	0.251485	0.161374	0.156498	0.167054	0.134262	0.145523	0.158141	0.190654	0.183012	0.16515	0.0967512	0.203664	0.270517	0.100956	0.122317	0.0837551	0.109535	0.0797768	0.137439
DDHD1	-0.5674	-0.458229	-0.467875	-1.2619	-1.26187	-1.2619	-0.162906	-0.247018	-0.166983	-1.26195	-1.26195	-1.26195	-1.26194	-0.35713	-1.26189	-0.149279	-1.26193	-0.246023	-1.26192	-1.26189	-1.26191
DDHD2	0.0481887	0.0484552	0.0483979	0.0445484	0.0445484	0.0458423	0.155181	0.150949	0.154336	NA	NA	NA	NA	NA	NA	NA	NA	NA	NA	NA	NA
DDOST	0.450217	0.435731	0.436342	0.463585	0.482237	0.471783	0.416351	0.413276	0.4016	0.332927	0.311831	0.307446	0.475352	0.41549	0.424663	0.468175	0.457374	0.527561	0.479181	0.473384	0.460807
DDR1	-1.26184	-1.16841	-1.26185	-1.26196	-1.26197	-1.26196	-0.00146028	0.0111324	-0.0113404	NA	NA	NA	NA	NA	NA	NA	NA	NA	NA	NA	NA
DDRGK1	0.351188	0.347463	0.348229	0.274245	0.276396	0.270784	0.258913	0.251385	0.252015	0.293213	0.301008	0.327648	0.304838	0.355873	0.313641	0.241597	0.242572	0.253806	0.258162	0.324953	0.225807
DDT	0.261699	0.265725	0.254117	0.604205	0.626336	0.599695	0.491012	0.593712	0.506553	0.43677	0.445034	0.441571	0.366535	0.401636	0.42037	0.386475	0.410904	0.38617	0.364391	0.342791	0.369557
DDX1	0.548951	0.539399	0.546669	0.483658	0.481679	0.479004	0.483919	0.47611	0.489694	0.653518	0.614308	0.606869	0.571171	0.575246	0.551217	0.690867	0.572796	0.641561	0.582152	0.556345	0.647017
DDX10	0.244593	0.245629	0.243303	0.19024	0.194786	0.190611	0.305181	0.290247	0.288557	-1.26195	-1.26195	-0.562018	0.0800001	-0.0355319	0.023741	0.160174	0.130564	0.0834059	0.0890125	0.110044	0.0605771
DDX11	0.071312	0.0705113	0.0732354	-0.0386018	-0.0475076	-0.0447783	-0.0238253	-0.0349538	-0.0329156	NA	NA	NA	NA	NA	NA	NA	NA	NA	NA	NA	NA
DDX17	0.633214	0.627357	0.622527	0.504853	0.510805	0.502195	0.541425	0.545249	0.541825	0.925831	0.952333	0.898697	0.97971	0.920124	0.898697	0.873508	0.784408	0.759385	0.844619	0.901995	0.792334
DDX18	0.45099	0.448809	0.451349	0.458008	0.468813	0.462727	0.66144	0.636841	0.63131	0.308014	0.333657	0.337592	0.334387	0.356604	0.354735	0.422726	0.408213	0.43677	0.366627	0.350466	0.364069
DDX19A	0.491285	0.48639	0.477523	0.564589	0.569416	0.563119	0.573609	0.573609	0.590883	0.345325	0.338933	0.364972	0.31027	0.358729	0.32947	0.388107	0.342917	0.362133	0.343968	0.364391	0.358522
DDX19B	-0.00326916	-0.0280003	-0.0266824	0.00742785	-0.0160803	0.00311202	-0.674306	-0.861834	-0.861459	0.229511	0.208619	0.220294	0.152245	0.219139	0.176829	0.281173	0.308464	0.24678	0.208496	0.245423	0.226149
DDX20	0.171536	0.167386	0.17065	0.255903	0.251174	0.258913	0.227902	0.21747	0.213372	-0.157998	-0.0607236	-0.0268194	-1.26194	-1.26193	-1.26189	0.120351	0.0161022	0.082874	0.177703	0.134227	0.130181
DDX21	0.739178	0.742114	0.73501	0.715212	0.705827	0.698352	1.21305	1.17779	1.14813	0.391424	0.369791	0.386695	0.400966	0.341593	0.351528	0.776112	0.712981	0.765032	0.97971	0.939485	0.914894
DDX23	0.471542	0.466757	0.46588	0.357879	0.366295	0.357879	0.425047	0.422822	0.421623	0.366328	0.37264	0.366859	0.431074	0.369178	0.37264	0.342611	0.316638	0.297324	0.302076	0.266674	0.305692
DDX24	0.275581	0.273622	0.280755	0.28314	0.290464	0.280363	0.379002	0.355486	0.349726	0.373719	0.40034	0.384129	0.359431	0.382354	0.381921	0.349237	0.368061	0.371614	0.33926	0.343048	0.364752
DDX27	0.328552	0.320351	0.325273	0.326974	0.321718	0.323659	0.450404	0.43688	0.426392	0.200456	0.20126	0.213262	0.283666	0.227236	0.220294	0.282535	0.293213	0.264249	0.322876	0.32831	0.313062
DDX28	-0.48357	-0.646033	-0.465698	-0.0284607	-0.0397779	-0.046685	0.045465	0.0339905	0.0134274	-0.681345	-1.26195	-1.26195	-1.26194	-1.26193	-1.26189	0.0647838	-1.26193	0.145374	0.155265	0.101282	0.0663334
DDX31	0.196992	0.192869	0.192373	0.170778	0.166494	0.167448	0.179577	0.176353	0.180004	0.0832647	0.125005	0.0771385	-0.0309743	0.0477793	0.0229057	0.169759	0.186948	0.179083	0.191648	0.176138	0.121188
DDX39A	0.537331	0.528176	0.534017	0.544519	0.55078	0.541825	0.715212	0.706672	0.67039	0.387903	0.375236	0.387313	0.395858	0.371138	0.373904	0.508521	0.430196	0.442635	0.384129	0.449541	0.413948
DDX39B	1.17779	1.14256	1.1672	0.748847	0.797924	0.762508	0.969764	0.983711	0.929502	0.94781	0.97971	0.952333	0.830286	0.8113	0.813659	0.956548	0.995151	1.04956	0.860672	0.883626	0.956548
DDX3X	0.351492	0.346646	0.340228	0.487677	0.4832	0.484768	0.481066	0.473568	0.46588	0.397961	0.391424	0.392946	0.412889	0.434433	0.462145	0.586506	0.474367	0.534222	0.692788	0.711785	0.701794
DDX3Y	0.567011	0.553738	0.561404	0.745351	0.729353	0.736456	0.747794	0.709408	0.705003	-0.967028	-0.00539679	-1.26195	-1.26194	-1.26193	-1.26189	0.119043	0.0235846	-0.0149849	-1.26192	-1.26189	-1.26191
DDX41	0.277697	0.265511	0.270083	0.228617	0.232011	0.227337	0.255817	0.249755	0.253274	0.185142	0.145536	0.19537	0.155613	0.209643	0.187878	0.218595	0.17181	0.140839	0.095687	0.286019	0.163057
DDX42	0.375252	0.364726	0.361937	0.385253	0.387159	0.388591	0.405745	0.399735	0.397455	0.37095	0.370474	0.361216	0.387903	0.338628	0.350616	0.400766	0.471437	0.395396	0.420262	0.3364	0.334174
DDX43	-0.454963	-0.450903	-0.358166	-1.26184	-1.26184	-1.26184	-1.26198	-1.26198	-1.26198	NA	NA	NA	NA	NA	NA	NA	NA	NA	NA	NA	NA
DDX46	0.457338	0.449709	0.451836	0.411486	0.411895	0.410061	0.466757	0.449169	0.459767	0.425074	0.477691	0.453707	0.454234	0.467842	0.464367	0.356307	0.357803	0.351041	0.362757	0.414478	0.397535
DDX47	0.446312	0.441848	0.443551	0.353016	0.349405	0.346081	0.398834	0.393748	0.398002	0.262049	0.265725	0.240471	0.270517	0.257882	0.240285	0.319525	0.334712	0.310856	0.333981	0.283809	0.288963
DDX49	0.272561	0.271335	0.267865	0.176932	0.180328	0.173979	0.276064	0.264787	0.257778	-0.448796	-1.26195	-1.26195	-1.26194	-1.26193	-1.26189	0.0187774	0.0941378	0.118124	0.038879	-0.150456	-1.26191
DDX5	1.187	1.13397	1.16301	1.09692	1.08262	1.06103	1.39252	1.29757	1.29757	0.50005	0.478107	0.486512	0.543756	0.457602	0.463423	0.746482	0.627059	0.667076	0.676459	0.706533	0.673637
DDX50	0.209546	0.206799	0.201608	0.12512	0.134174	0.125352	0.197509	0.194278	0.208967	0.157747	0.098629	0.111269	0.173645	0.160174	0.0736715	0.281329	0.119588	0.222863	0.251261	0.255098	0.2178
DDX51	0.253679	0.251698	0.254507	0.224867	0.221798	0.217241	0.278016	0.265725	0.263398	-0.856656	0.00954537	-0.00907057	0.123952	0.0110923	0.0884219	0.159848	0.131299	0.165616	0.112231	0.015815	0.042574
DDX52	0.307807	0.304992	0.308399	0.254035	0.253371	0.251789	0.272039	0.257931	0.247603	0.095787	0.0898649	0.107623	0.1073	0.0996776	0.127574	0.125797	0.143678	0.215288	0.164439	0.248295	0.212247
DDX54	0.212643	0.202172	0.193017	0.266833	0.273864	0.275336	0.353908	0.34398	0.354619	0.119588	0.0967892	0.101282	0.0905188	0.989888	0.788601	0.210855	0.162456	0.138353	0.260637	0.222577	0.272101
DDX55	0.263659	0.259268	0.258115	0.193386	0.198325	0.194278	0.219896	0.224157	0.221869	0.114307	0.0902603	0.0725848	0.139004	-0.0021832	0.0555928	0.0341169	0.117484	0.169246	0.146055	0.277575	0.259609
DDX56	0.28191	0.276585	0.274148	0.265111	0.262166	0.257406	0.429087	0.411486	0.40517	0.0865595	0.0357542	0.075647	-0.248492	0.122931	0.0695407	0.199925	0.172182	0.131094	0.281017	0.282453	0.267704
DDX58	0.456923	0.45099	0.455137	0.284921	0.286062	0.301011	0.288759	0.284421	0.292169	0.263603	0.279055	0.271277	0.303096	0.29748	0.318386	0.337592	0.375024	0.332733	0.304076	0.163537	0.226473
DDX59	0.0819585	0.0825509	0.0777896	-1.16508	-0.669857	-0.856375	0.0139655	0.024869	0.0263375	-1.26195	-1.26195	-1.26195	-1.26194	-1.26193	-1.26189	-0.856656	-1.26193	-0.0204773	0.0881159	0.389402	0.182086
DDX6	0.517704	0.505124	0.511123	0.561404	0.579407	0.564589	0.596523	0.587571	0.574474	0.452961	0.475026	0.440048	0.536633	0.427869	0.43313	0.380115	0.375423	0.432261	0.431908	0.424507	0.398506
DDX60	0.0732354	0.0735225	0.0770504	-1.262	-1.262	-1.262	-0.468663	-0.465698	-0.451952	0.239232	0.20482	0.24016	0.253806	0.247903	0.227638	0.340765	0.351041	0.376862	0.179383	0.191648	0.197382
DEAF1	-0.0165182	-0.00356065	-0.00630348	-1.26196	-1.26196	-1.26196	-0.448369	-0.44586	-0.453751	NA	NA	NA	NA	NA	NA	NA	NA	NA	NA	NA	NA
DECR1	0.30302	0.302687	0.293513	0.249021	0.251698	0.243526	0.188594	0.190411	0.205165	0.567578	0.591177	0.590524	0.579044	0.518218	0.506514	0.575246	0.614308	0.535458	0.438544	0.441571	0.441861
DECR2	0.0577405	0.0613809	0.0537659	0.130715	0.130715	0.127832	0.076959	0.0966059	0.123077	NA	NA	NA	NA	NA	NA	NA	NA	NA	NA	NA	NA
DEDD	-0.244258	-0.249838	-0.0703849	-1.26195	-1.26195	-1.26195	0.0049421	0.00229451	-0.0201842	NA	NA	NA	NA	NA	NA	NA	NA	NA	NA	NA	NA
DEF6	0.511818	0.497799	0.504608	0.443985	0.452237	0.440553	0.395132	0.3943	0.392871	0.49251	0.497171	0.534222	0.46244	0.470642	0.459035	0.335161	0.359262	0.304508	0.359815	0.354026	0.347415
DEF8	-0.0331088	-0.0236659	-0.0409522	-1.26194	-1.26195	-1.26195	-1.26186	-1.26188	-1.26188	NA	NA	NA	NA	NA	NA	NA	NA	NA	NA	NA	NA
DEGS1	0.168986	0.166028	0.16145	0.352125	0.34364	0.362854	0.187536	0.194224	0.18536	-1.26195	-0.631283	-1.26195	-0.0117718	-1.26193	-1.26189	-1.26195	0.0541919	-1.26194	-1.26192	-1.26189	-1.26191
DEK	0.665539	0.657469	0.658393	0.502583	0.504314	0.506135	0.564038	0.560239	0.560655	0.515557	0.531438	0.540832	0.500489	0.478107	0.53069	0.41985	0.42223	0.454996	0.416258	0.39406	0.391723
DENND10	0.2783	0.276952	0.275132	0.18536	0.19575	0.190119	0.18925	0.187095	0.198759	NA	NA	NA	NA	NA	NA	NA	NA	NA	NA	NA	NA
DENND11	0.210841	0.212087	0.212556	0.151017	0.157559	0.154388	0.143015	0.160551	0.168435	NA	NA	NA	NA	NA	NA	NA	NA	NA	NA	NA	NA
DENND1A	0.0900906	0.0898709	0.0824645	-0.0129332	-0.00789822	-0.0203187	0.0453316	0.0579282	0.0636084	NA	NA	NA	NA	NA	NA	NA	NA	NA	NA	NA	NA
DENND1B	0.145762	0.138916	0.135703	0.059988	0.0787173	0.0716855	0.0271532	0.0297781	0.0334996	NA	NA	NA	NA	NA	NA	NA	NA	NA	NA	NA	NA
DENND1C	0.214245	0.207055	0.192423	0.085642	0.0874493	0.0773862	0.0461025	0.0562431	0.0601489	0.247192	0.261752	0.24504	0.19493	0.215042	0.208254	0.072858	0.106145	0.143919	0.106367	0.0352712	-0.016768
DENND2D	0.400177	0.394162	0.409875	0.247739	0.23341	0.239448	0.263973	0.251485	0.236275	0.225942	0.219	0.214758	0.199791	0.168028	0.220053	0.155097	0.164177	0.158743	0.0665779	-0.035313	0.0580093
DENND3	-0.673737	-0.860468	-0.862079	-1.262	-1.262	-1.262	-1.26188	-1.26188	-1.26185	NA	NA	NA	NA	NA	NA	NA	NA	NA	NA	NA	NA
DENND4A	-0.447509	-0.450246	-0.447809	0.0376546	0.0502595	0.050375	-0.00128873	-0.00572329	0.00049193	-0.0425492	-0.251514	-0.0321256	-1.26194	-1.26193	-1.26189	-0.864167	-1.26193	-1.26194	0.0469998	-1.26189	-1.26191
DENND4B	0.176518	0.171927	0.174944	0.162352	0.165531	0.159341	0.171695	0.168055	0.170179	-1.26195	-0.646991	-0.446355	-1.26194	-1.26193	-1.26189	-0.0520641	-1.26193	-0.651326	-1.26192	-1.26189	-1.26191
DENND4C	0.100566	0.0972245	0.100404	0.120258	0.117401	0.120069	0.0551418	0.0621476	0.0655173	0.188134	0.0684929	0.127028	0.116328	0.137336	0.182889	-0.0498693	-1.26193	-0.241095	0.0706635	0.110924	0.0590641
DENND5A	-1.07117	-1.26184	-1.26183	-0.134031	-0.0472741	-0.0598979	-0.0643703	-0.241766	-0.0484122	NA	NA	NA	NA	NA	NA	NA	NA	NA	NA	NA	NA
DENND6A	-0.349299	-0.354366	-0.258422	0.0305208	0.0317464	0.0294379	0.0334996	0.0320961	0.0179844	NA	NA	NA	NA	NA	NA	NA	NA	NA	NA	NA	NA
DENR	0.458943	0.461207	0.437841	0.433203	0.422822	0.428567	0.531809	0.527004	0.546347	0.232092	0.289809	0.24678	0.233821	0.266189	0.281951	0.244379	0.281173	0.246392	0.204742	0.232826	0.185906
DEPDC1	0.126457	0.139456	0.144728	-1.26187	-1.26188	-1.26189	-1.26198	-1.26198	-1.26198	NA	NA	NA	NA	NA	NA	NA	NA	NA	NA	NA	NA
DEPDC1B	-1.26197	-1.26197	-1.26197	-0.25464	-0.241343	-0.349086	-1.26198	-1.26198	-1.26198	NA	NA	NA	NA	NA	NA	NA	NA	NA	NA	NA	NA
DEPDC5	-0.0490512	-0.0551082	-0.0388898	-1.26186	-1.26186	-1.26187	-0.0459286	-0.0423287	-0.0468464	NA	NA	NA	NA	NA	NA	NA	NA	NA	NA	NA	NA
DERA	0.253773	0.251559	0.254764	0.26611	0.270401	0.266659	0.26285	0.250376	0.248574	0.184783	0.129181	0.180343	0.134161	0.121533	0.152681	0.175238	0.145825	0.213262	0.181675	0.125952	0.173261
DERL1	0.338266	0.335116	0.325468	0.288759	0.29736	0.28692	0.232433	0.241966	0.261616	0.0737326	0.0433913	0.0631844	0.0954907	0.139004	0.18064	0.171723	0.118482	0.140217	0.193625	0.143536	0.147887
DERL2	0.024869	0.0452498	0.0179844	0.20993	0.239267	0.221869	0.250125	0.230521	0.224654	0.0408714	0.0753457	0.0565393	0.190478	0.0955669	0.136493	0.101873	0.172676	0.139102	-0.0103163	0.070319	0.102696
DESI1	-1.26197	-1.26197	-1.26197	0.033596	0.0407791	0.0483298	-1.26198	-1.26198	-1.26198	-1.26195	-1.26195	-1.26195	-1.26194	-1.26193	-1.26189	0.0308809	-1.26193	-0.650597	-1.26192	-1.26189	-1.26191
DESI2	-0.646033	-0.605525	-0.463039	0.0690268	0.0924823	0.0816002	0.169695	0.182891	0.165281	NA	NA	NA	NA	NA	NA	NA	NA	NA	NA	NA	NA
DET1	0.0145831	0.0215914	0.0198835	-0.00969851	-0.0104893	-0.0114602	-0.66664	-0.56472	-0.470399	NA	NA	NA	NA	NA	NA	NA	NA	NA	NA	NA	NA
DFFA	0.317154	0.370998	0.389338	0.167236	0.170179	0.162398	0.365491	0.358992	0.362168	0.323162	0.313201	0.315887	0.258324	0.257425	0.278339	0.230037	0.291958	0.266674	0.274019	0.239232	0.268826
DFFB	0.408769	0.405481	0.40213	0.0598074	0.051896	0.0579913	0.28747	0.288487	0.295679	0.100601	0.0880027	0.0334502	-0.667854	-0.151633	0.0300995	0.135682	-1.26193	0.130474	0.181148	0.0665779	0.0709049
DGAT1	0.116462	0.10908	0.116055	0.109175	0.153895	0.122298	0.0118007	0.0248077	0.0201444	0.114836	-1.26195	0.0674358	0.0141879	-1.26193	-1.26189	-1.26195	-1.26193	-1.26194	-1.26192	-1.26189	-1.26191
DGCR2	-1.26188	-1.26187	-1.26187	-1.26196	-1.26196	-1.26196	0.0236155	0.00166441	-0.00479668	NA	NA	NA	NA	NA	NA	NA	NA	NA	NA	NA	NA
DGCR6	-1.26197	-1.26197	-1.26197	-1.26193	-1.26191	-1.26194	-1.26185	-1.26184	-1.26184	NA	NA	NA	NA	NA	NA	NA	NA	NA	NA	NA	NA
DGCR8	0.118871	0.113826	0.108543	0.176866	0.175912	0.172095	0.142103	0.123219	0.124561	NA	NA	NA	NA	NA	NA	NA	NA	NA	NA	NA	NA
DGKA	0.419917	0.41168	0.407534	0.240086	0.242817	0.240182	0.191568	0.191991	0.186567	0.627866	0.673637	0.67248	0.602295	0.636322	0.624655	0.531438	0.490633	0.496591	0.481557	0.449783	0.475026
DGKD	-1.1054	-0.965406	-1.26184	-1.26189	-1.26189	-1.26189	0.0196133	0.019254	0.012597	NA	NA	NA	NA	NA	NA	NA	NA	NA	NA	NA	NA
DGKE	0.0113336	0.00624007	-0.00508322	-0.0291103	-0.0500683	-0.0373054	-0.0523364	-0.0575858	-0.0236659	-0.964	-1.26195	-1.26195	-0.039561	-1.26193	-0.0422744	0.0486968	0.00606993	0.0722935	-0.0483974	-1.26189	-1.26191
DGKH	-0.039278	-0.0569391	-0.151631	-0.276141	-0.150099	-0.0664165	-1.26184	-1.26183	-0.962448	NA	NA	NA	NA	NA	NA	NA	NA	NA	NA	NA	NA
DGKQ	-0.0573371	-0.0613927	-0.0595255	0.0275942	0.0203299	0.0242755	-1.26188	-1.26189	-1.26189	NA	NA	NA	NA	NA	NA	NA	NA	NA	NA	NA	NA
DGKZ	0.269971	0.261056	0.264639	0.159526	0.164508	0.158232	0.159341	0.161266	0.164696	0.202685	0.248851	0.203081	0.271163	0.264806	0.261477	0.166367	0.156546	0.219425	0.0231452	0.137439	0.120116
DGUOK	0.380367	0.381633	0.374979	0.204745	0.210414	0.202565	0.226861	0.228034	0.222468	0.216555	0.186842	0.223222	0.179856	0.1995	0.230155	0.100491	0.0939039	0.194131	-0.0256461	-1.26189	-1.26191
DHCR24	-0.0191053	-0.0320666	-0.0285793	0.131682	0.110116	0.125806	0.142918	0.117401	0.098777	NA	NA	NA	NA	NA	NA	NA	NA	NA	NA	NA	NA
DHCR7	0.269793	0.262111	0.261699	0.204235	0.209619	0.205565	0.204616	0.18817	0.197036	0.0115605	-0.444537	0.0857132	-0.24175	0.0499155	0.0289461	-0.253452	-1.26193	-0.045213	-0.00181017	0.0162058	0.0104652
DHDDS	-0.26469	-0.255058	-0.0687896	-0.451952	-0.470068	-0.460988	0.0162348	0.0161529	0.00349764	NA	NA	NA	NA	NA	NA	NA	NA	NA	NA	NA	NA
DHDH	-0.470068	-0.558176	-0.465475	-1.26196	-1.26197	-1.26196	-1.26198	-1.26198	-1.26198	NA	NA	NA	NA	NA	NA	NA	NA	NA	NA	NA	NA
DHFR	0.354137	0.341901	0.345489	0.633888	0.607612	0.617335	0.353016	0.332697	0.356622	-1.26195	-1.26195	-1.26195	-1.26194	-1.26193	-1.26189	0.200194	0.224382	0.214669	0.262896	0.226327	0.241717
DHODH	0.149145	0.137358	0.132844	0.175352	0.178636	0.176666	0.177726	0.177884	0.168986	-0.449855	0.00971662	0.070576	-0.0669751	0.285699	0.0724573	0.21368	0.233379	0.255423	0.255687	0.291728	0.279329
DHPS	-0.149812	-0.247018	-0.156957	0.202043	0.190319	0.203035	0.136704	0.134326	0.140897	-1.26195	-1.26195	-0.644739	-1.26194	-1.26193	-1.26189	0.147887	0.118124	0.103457	0.166367	0.19493	0.188134
DHRS1	0.264857	0.268305	0.260668	0.38573	0.384559	0.38573	0.318361	0.327728	0.342993	0.0826237	0.144808	0.148116	0.0409631	0.127264	0.0976358	0.0526871	0.0413233	-0.255586	-1.26192	-1.26189	-1.26191
DHRS11	0.102843	0.108277	0.114967	0.00568435	0.0116425	0.0187185	0.0947919	0.0939907	0.0791944	-0.049176	-1.26195	-0.0153417	-1.26194	-1.26193	-1.26189	-1.26195	-1.26193	-0.664129	-0.0278853	-1.26189	-1.26191
DHRS13	0.107774	0.118465	0.106353	0.107567	0.115976	0.113036	0.188434	0.179781	0.188973	NA	NA	NA	NA	NA	NA	NA	NA	NA	NA	NA	NA
DHRS4	0.299687	0.305802	0.294736	0.284469	0.293912	0.286763	0.245125	0.227038	0.236211	0.122722	0.192388	0.173921	0.165509	0.197067	0.202315	0.0795517	0.218766	0.212735	-1.26192	-1.26189	-1.26191
DHRS7	0.230933	0.232228	0.226468	0.1432	0.11821	0.139572	0.151777	0.154931	0.163803	0.296884	0.27521	0.298484	0.343568	0.241597	0.227965	0.369367	0.423211	0.44632	0.366209	0.186948	0.310372
DHRS7B	0.29363	0.289496	0.293986	0.246003	0.248426	0.248354	0.255529	0.250445	0.238741	NA	NA	NA	NA	NA	NA	NA	NA	NA	NA	NA	NA
DHRSX	-0.15923	-0.0560774	-0.243255	0.0865574	0.107156	0.0966842	0.104603	0.0831389	0.0834279	NA	NA	NA	NA	NA	NA	NA	NA	NA	NA	NA	NA
DHX15	0.681476	0.674881	0.667081	0.536052	0.532187	0.532954	0.589996	0.591393	0.587986	0.547379	0.549235	0.547969	0.58917	0.585645	0.558571	0.628913	0.594061	0.648521	0.640573	0.661122	0.645897
DHX16	0.267452	0.263453	0.265023	0.230113	0.236547	0.23262	0.263573	0.262606	0.2669	0.0552535	0.112111	0.0285088	0.170548	0.138161	0.114836	0.184333	0.123316	0.126827	0.23183	0.261661	0.233945
DHX29	0.198372	0.196114	0.19024	0.243449	0.236387	0.240398	0.243303	0.22577	0.232127	0.147283	0.09599	0.117121	0.1017	-1.26193	-0.0256461	0.168409	0.143367	0.177549	0.158187	0.243419	0.216888
DHX30	0.196207	0.194278	0.193845	0.197509	0.198163	0.200955	0.236067	0.23356	0.234933	0.176484	0.176787	0.186687	0.248718	0.205307	0.261023	0.351528	0.35544	0.369063	0.353479	0.395858	0.360703
DHX32	-0.859255	-0.856101	-0.865044	-1.26185	-1.26188	-1.26184	-0.649193	-0.644298	-0.457558	NA	NA	NA	NA	NA	NA	NA	NA	NA	NA	NA	NA
DHX33	0.16008	0.16151	0.166101	0.173381	0.173784	0.17229	0.295411	0.287785	0.2873	NA	NA	NA	NA	NA	NA	NA	NA	NA	NA	NA	NA
DHX34	0.15612	0.150878	0.148813	0.0542474	0.055211	0.0467573	0.0928517	0.0882757	0.103425	NA	NA	NA	NA	NA	NA	NA	NA	NA	NA	NA	NA
DHX35	0.170527	0.166411	0.163849	0.0687326	0.0750055	0.0690268	0.172555	0.176011	0.167693	NA	NA	NA	NA	NA	NA	NA	NA	NA	NA	NA	NA
DHX36	0.283959	0.283023	0.281657	0.263398	0.271058	0.267246	0.293409	0.289589	0.291292	0.199791	0.166591	0.192731	0.222693	0.10177	0.098358	0.293104	0.278889	0.280861	0.184659	0.0965986	0.14174
DHX37	0.224079	0.222575	0.224221	0.185026	0.187008	0.183109	0.312272	0.303547	0.301231	0.00198753	-0.350048	0.0825181	0.07275	-1.26193	0.0376182	0.0842947	0.128964	0.146055	-1.26192	0.0377334	-0.064447
DHX38	0.243526	0.237588	0.236211	0.188013	0.188973	0.186475	0.227116	0.22127	0.22567	0.196039	0.200456	0.185057	0.263509	0.199281	0.192618	0.28161	0.27376	0.271359	0.279895	0.353148	0.266358
DHX40	0.0308872	0.0347355	0.0394709	-1.26185	-1.26183	-1.26183	-0.037867	-0.0744831	-0.151045	NA	NA	NA	NA	NA	NA	NA	NA	NA	NA	NA	NA
DHX57	0.107913	0.107083	0.107913	0.0326441	0.0234957	0.0320961	-0.0185495	-0.0262164	-0.023113	NA	NA	NA	NA	NA	NA	NA	NA	NA	NA	NA	NA
DHX58	0.232228	0.234157	0.230752	0.133372	0.142292	0.138267	0.130877	0.12898	0.155417	-1.26195	-1.26195	-1.26195	-0.649099	-1.26193	-1.26189	-0.673673	0.0807539	0.0916225	-1.26192	-0.0679018	-1.26191
DHX8	0.254274	0.25233	0.248806	0.176011	0.173632	0.173314	0.262054	0.255138	0.254274	0.0117205	0.128847	0.038879	0.158597	0.188228	0.123179	0.198769	0.137527	0.181582	0.145708	0.12476	0.145226
DHX9	0.651058	0.632616	0.630055	0.575569	0.594208	0.58226	0.660932	0.648518	0.645366	0.876527	0.931488	0.888788	0.851599	0.847668	0.860672	1.08345	0.910785	0.929113	1.13117	0.914894	1.09801
DIABLO	-0.768737	-0.658227	-0.858519	0.114967	0.126457	0.12512	-0.0117399	0.0417277	0.00786128	0.361216	0.378138	0.366053	0.262614	0.240576	0.285031	0.167389	0.127892	0.1073	0.260108	0.222693	0.23712
DIAPH1	0.40517	0.396859	0.405331	0.412127	0.40517	0.40861	0.352793	0.345196	0.343808	0.649891	0.605964	0.641561	0.594061	0.540349	0.514254	0.488493	0.496591	0.506958	0.534222	0.537116	0.58917
DIAPH2	0.131164	0.127959	0.121482	0.0247483	0.024448	0.0241852	-0.0659666	-0.257124	-0.242418	NA	NA	NA	NA	NA	NA	NA	NA	NA	NA	NA	NA
DIAPH3	-0.369183	-0.457169	-0.45784	0.136344	0.14487	0.14691	-0.96893	-1.26184	-1.07236	NA	NA	NA	NA	NA	NA	NA	NA	NA	NA	NA	NA
DICER1	0.0680265	0.0619406	0.0599018	0.074938	0.0711492	0.0727963	0.119451	0.120215	0.124655	NA	NA	NA	NA	NA	NA	NA	NA	NA	NA	NA	NA
DIDO1	0.223534	0.213195	0.208175	0.16922	0.174867	0.163217	0.223627	0.216537	0.214713	0.207454	0.193819	0.23498	0.208496	0.165074	0.168769	0.146878	0.11368	0.133885	0.164805	0.183175	0.12308
DIMT1	0.346081	0.343181	0.344403	0.219351	0.207614	0.217591	0.294829	0.290464	0.284521	0.27957	0.283953	0.273056	0.188844	0.218313	0.202581	0.206544	0.216888	0.24183	0.364752	0.369063	0.384891
DIP2B	0.0574419	0.0526002	0.0558224	0.11673	0.133831	0.128418	0.17558	0.164938	0.181521	-1.26195	-1.26195	-1.26195	-0.0363216	-0.567018	0.00293129	-0.647328	-0.00400518	0.0589459	0.0679599	0.0770521	0.166837
DIPK1A	0.0570741	0.0537659	0.0310941	-1.262	-1.262	-1.262	-1.26198	-1.26198	-1.26198	NA	NA	NA	NA	NA	NA	NA	NA	NA	NA	NA	NA
DIPK2A	-0.253514	-0.350828	-0.246278	0.204041	0.207193	0.209698	0.0383239	0.0490244	0.0553459	NA	NA	NA	NA	NA	NA	NA	NA	NA	NA	NA	NA
DIS3	0.412467	0.40264	0.40313	0.368092	0.368848	0.369239	0.388484	0.37821	0.376569	0.304076	0.291849	0.276923	0.329781	0.298835	0.274507	0.334174	0.32271	0.351882	0.316952	0.330619	0.308311
DIS3L	0.163565	0.163257	0.161945	0.0987234	0.102843	0.0997163	0.0884154	0.084413	0.0787173	-1.26195	0.104069	-0.0142467	-1.26194	-1.26193	-1.26189	-1.26195	0.0260633	-1.26194	0.201566	-1.26189	0.238571
DIS3L2	0.246305	0.240086	0.23645	0.152589	0.144006	0.146066	0.201947	0.209698	0.216297	-1.26195	-0.137292	0.0419434	-0.671249	-1.26193	-1.26189	0.158187	0.125216	0.134428	-1.26192	-1.26189	-1.26191
DKC1	0.585513	0.591393	0.569125	0.448053	0.45005	0.445051	0.592372	0.589996	0.581925	0.490963	0.485409	0.496174	0.481242	0.491379	0.49116	0.579044	0.551217	0.609137	0.544135	0.526457	0.514254
DLAT	0.372208	0.376444	0.375493	0.261699	0.261108	0.254583	0.351746	0.352518	0.357879	0.41682	0.41659	0.42223	0.411142	0.418639	0.417135	0.434966	0.382149	0.406968	0.390776	0.397961	0.376862
DLD	0.473777	0.468224	0.468602	0.352654	0.345489	0.350908	0.40213	0.383822	0.373886	0.453707	0.4413	0.414985	0.392946	0.479941	0.489213	0.437407	0.454115	0.459035	0.483112	0.493657	0.426566
DLG1	0.195003	0.188481	0.190834	0.166924	0.167236	0.166554	0.210004	0.205649	0.217348	-0.0520641	0.0171087	0.0151528	0.140557	-0.354692	-1.26189	0.122722	0.136071	-0.0367588	-1.26192	-1.26189	0.121458
DLG3	-0.0427455	-0.0388898	-0.0326841	-1.262	-1.262	-1.262	0.0129925	0.0178859	0.0234957	NA	NA	NA	NA	NA	NA	NA	NA	NA	NA	NA	NA
DLGAP4	0.288227	0.297862	0.31519	0.188434	0.188867	0.197036	0.176281	0.197754	0.184043	0.133772	0.121964	0.168887	0.0918417	0.173006	0.0967892	-0.659019	0.000336441	-0.354692	-0.35547	0.0279831	0.0635719
DLGAP5	-1.26197	-1.26197	-1.26197	0.324605	0.33586	0.338777	0.216674	0.19575	0.19409	-1.26195	-1.26195	-1.26195	-1.26194	-0.245769	-1.26189	0.0222444	-1.26193	-1.26194	-0.258732	-1.26189	-1.26191
DLST	0.504608	0.504853	0.499827	0.371716	0.384677	0.376843	0.461398	0.465003	0.460212	0.506958	0.505362	0.50005	0.518218	0.510114	0.496174	0.445333	0.454115	0.443242	0.449783	0.492182	0.451477
DMAC1	0.306562	0.317744	0.315608	0.237962	0.240398	0.234407	0.290349	0.307807	0.299166	-1.26195	-0.00907057	-1.26195	0.0759319	-0.0249026	0.0431152	-0.0653972	-0.0164787	-0.0187528	-1.26192	-1.26189	-1.26191
DMAP1	0.365706	0.361326	0.357573	0.22388	0.215515	0.221353	0.301231	0.288129	0.290171	0.109449	-0.00862765	0.104197	-0.0024716	-0.242818	0.0112427	-1.26195	-0.257662	-0.052382	0.00745965	0.078327	0.0736715
DMXL1	-0.0437941	-0.0316607	-0.0177383	-1.00587	-1.26183	-1.06837	-0.000125366	0.00071119	0.00387798	NA	NA	NA	NA	NA	NA	NA	NA	NA	NA	NA	NA
DNA2	-1.26188	-1.26188	-1.26188	0.0342323	0.0365782	0.035555	-0.0253632	-0.0541329	-0.0363333	NA	NA	NA	NA	NA	NA	NA	NA	NA	NA	NA	NA
DNAAF2	-1.26197	-1.26197	-1.26197	-0.445265	-0.0698739	-0.25873	-1.26198	-1.26198	-1.26198	NA	NA	NA	NA	NA	NA	NA	NA	NA	NA	NA	NA
DNAAF5	0.17229	0.164845	0.158397	0.161005	0.159174	0.164259	0.235132	0.239827	0.252976	-0.0235171	-0.358647	-0.651326	-1.26194	-1.26193	0.0463895	0.0912032	-1.26193	-1.26194	0.206296	0.130019	0.141163
DNAH5	0.0478817	0.0524531	0.0521436	-1.26189	-1.26187	-1.26186	-1.26198	-1.26198	-1.26198	NA	NA	NA	NA	NA	NA	NA	NA	NA	NA	NA	NA
DNAJA1	0.502195	0.512209	0.508359	0.53865	0.55038	0.546669	0.69413	0.647652	0.666401	0.256578	0.361027	0.365532	0.315017	0.330185	0.285427	0.467527	0.462796	0.439453	0.569855	0.593349	0.546319
DNAJA2	0.560931	0.560239	0.575056	0.614791	0.613994	0.619287	0.664627	0.639694	0.633214	0.326519	0.312315	0.295339	0.337743	0.340592	0.3135	0.494597	0.370212	0.366209	0.291583	0.326367	0.328618
DNAJA3	0.369142	0.373551	0.371931	0.294931	0.297256	0.292788	0.394453	0.394889	0.398834	0.180343	0.190654	0.220118	0.195563	0.210644	0.214368	0.260637	0.223328	0.260521	0.242572	0.258809	0.200456
DNAJA4	0.158938	0.163151	0.170179	0.171426	0.183646	0.180693	-1.26191	-1.26191	-1.26191	NA	NA	NA	NA	NA	NA	NA	NA	NA	NA	NA	NA
DNAJB1	0.549963	0.563548	0.555315	0.461003	0.448428	0.462987	0.490375	0.489934	0.499074	0.330807	0.33986	0.364069	0.41659	0.431908	0.419173	0.329781	0.35963	0.324953	0.319665	0.331063	0.336781
DNAJB11	0.503012	0.498112	0.501512	0.648518	0.656635	0.643172	0.520344	0.48738	0.482237	0.0859604	0.133187	0.118124	0.204252	0.164281	0.208361	0.192039	0.265119	0.229804	0.188184	0.217323	0.179655
DNAJB12	0.0664444	0.0631308	0.0659906	0.184696	0.180737	0.182285	0.0765012	0.0753041	0.0683102	-1.26195	-1.26195	-1.26195	-1.26194	-1.26193	-1.26189	0.0865168	-0.160007	0.0665779	0.0257822	-0.0021832	0.013887
DNAJB2	-1.26197	-1.26197	-1.26197	-1.262	-1.262	-1.262	0.0903685	0.0947919	0.108341	-0.241511	-0.250054	-0.0679018	-0.243437	0.00252057	0.0568878	-1.26195	-1.26193	-1.26194	-0.045213	-0.0278853	-0.245553
DNAJB4	0.293986	0.289929	0.293093	0.0821678	0.0906334	0.0863423	0.278971	0.278163	0.282526	-1.26195	-1.26195	-1.26195	-1.26194	-1.26193	-1.26189	-1.26195	0.0270148	-1.26194	-1.26192	-1.26189	-1.26191
DNAJB5	0.0780009	0.0741649	0.0809107	-0.0352093	-0.038462	-0.0395166	0.200096	0.192808	0.184975	NA	NA	NA	NA	NA	NA	NA	NA	NA	NA	NA	NA
DNAJB6	0.313613	0.310664	0.313811	0.354137	0.368426	0.352908	0.368681	0.371716	0.366695	0.0224068	0.0600105	-1.26195	0.0427081	0.181441	0.105737	0.148219	0.173921	0.0858182	0.113078	0.187734	0.142958
DNAJB9	-0.0502184	-0.0423287	-0.0296686	-1.262	-1.262	-1.262	0.0138618	-0.00872737	-0.0226425	NA	NA	NA	NA	NA	NA	NA	NA	NA	NA	NA	NA
DNAJC1	0.168746	0.15982	0.162835	0.219225	0.22302	0.221729	0.135819	0.128903	0.124261	-0.0469766	-1.26195	-1.26195	-1.26194	-1.26193	-1.26189	-0.247154	-0.0520641	-0.0543945	-1.26192	0.0690182	0.0511619
DNAJC10	0.174944	0.172358	0.171255	0.204796	0.217348	0.206337	0.176579	0.176806	0.174404	-1.26195	-1.26195	-1.26195	-0.467912	-0.00181017	0.0302696	-0.0157862	0.0766797	-1.26194	-0.34903	0.0496007	-1.26191
DNAJC11	0.267016	0.269061	0.271216	0.361082	0.372909	0.362046	0.381633	0.38573	0.381633	0.150772	0.157404	0.0509739	0.228743	0.317191	0.24504	0.265054	0.126624	0.207825	0.292331	0.368754	0.335161
DNAJC13	0.249583	0.243775	0.24449	0.196004	0.195689	0.198595	0.236547	0.236936	0.244141	0.209177	0.206145	0.210855	0.261023	0.25937	0.244083	0.201453	0.159283	0.173137	0.190654	0.210644	0.202372
DNAJC14	-0.963833	-0.750037	-0.930102	0.0514522	0.0510681	0.0555703	-1.26185	-1.26184	-1.26186	NA	NA	NA	NA	NA	NA	NA	NA	NA	NA	NA	NA
DNAJC15	-1.26197	-1.26197	-1.26197	0.170132	0.170366	0.17558	0.122686	0.135765	0.150536	NA	NA	NA	NA	NA	NA	NA	NA	NA	NA	NA	NA
DNAJC16	0.0830054	0.0803309	0.0770147	-0.0159833	-0.0145951	-0.0112266	0.0591699	0.0539871	0.0543244	NA	NA	NA	NA	NA	NA	NA	NA	NA	NA	NA	NA
DNAJC17	0.219351	0.222116	0.223316	0.190178	0.196878	0.18817	0.263185	0.270472	0.269659	-1.26195	-1.26195	-0.0202665	-0.045945	-0.0285625	0.0140347	0.0211418	0.0231452	-0.152323	-1.26192	0.0719973	-1.26191
DNAJC18	-1.26197	-1.26197	-1.26197	-1.26183	-1.26186	-1.26183	-1.26198	-1.26198	-1.26198	NA	NA	NA	NA	NA	NA	NA	NA	NA	NA	NA	NA
DNAJC19	0.295775	0.301102	0.2962	0.221661	0.213195	0.228769	-1.26198	-1.26198	-1.26198	-1.26195	-1.26195	-1.26195	-1.26194	-0.0232317	-1.26189	0.0359092	-1.26193	-0.376958	-0.0821555	-1.26189	-1.26191
DNAJC2	0.399267	0.392058	0.403257	0.401708	0.397141	0.394797	0.401708	0.402257	0.4061	0.16576	0.145109	0.147887	0.126624	0.103328	0.199371	0.174495	0.183065	0.17975	0.218043	0.232015	0.195669
DNAJC21	0.151103	0.148952	0.14197	0.224079	0.227429	0.22577	0.271912	0.2785	0.281809	-1.26195	-1.26195	-0.365065	-1.26194	-1.26193	-1.26189	-1.26195	-1.26193	-1.26194	-0.000896475	-1.26189	-1.26191
DNAJC24	-1.26197	-1.26197	-1.26197	0.158045	0.150388	0.151674	-0.0102596	0.0198835	-0.00416579	NA	NA	NA	NA	NA	NA	NA	NA	NA	NA	NA	NA
DNAJC25	-1.26183	-1.26184	-1.1054	0.0369096	0.0500344	0.0469901	0.0226947	0.0227888	0.0189905	NA	NA	NA	NA	NA	NA	NA	NA	NA	NA	NA	NA
DNAJC27	-1.26197	-1.26197	-1.26197	-1.262	-1.262	-1.262	-0.661179	-0.665226	-0.674781	NA	NA	NA	NA	NA	NA	NA	NA	NA	NA	NA	NA
DNAJC3	0.363657	0.365706	0.362854	0.432693	0.44386	0.436608	0.411311	0.399121	0.390824	-0.0393748	0.0190617	0.123842	-1.26194	-1.26193	-1.26189	0.233326	0.186404	0.22534	0.176138	0.139606	0.0971531
DNAJC5	0.395132	0.388211	0.398154	0.2873	0.271824	0.275846	0.385579	0.371406	0.369239	0.173352	0.160044	0.20168	0.135778	0.0987242	0.131191	0.148731	0.169972	0.095787	-1.26192	-1.26189	-1.26191
DNAJC7	0.464778	0.462727	0.461398	0.498714	0.493791	0.493791	0.476594	0.463155	0.472008	0.132875	0.151467	0.151853	0.17975	0.223328	0.219704	0.35201	0.38257	0.311661	0.289689	0.286886	0.296278
DNAJC8	0.764063	0.750942	0.754619	0.609742	0.611733	0.595986	0.587571	0.581061	0.566481	0.394965	0.374225	0.344799	0.388688	0.439453	0.406146	0.38617	0.338459	0.343968	0.340967	0.37264	0.356307
DNAJC9	0.778365	0.762508	0.784875	0.522966	0.508359	0.509867	0.585513	0.562177	0.565041	0.393557	0.373904	0.38539	0.401799	0.371968	0.417393	0.351724	0.423747	0.397713	0.404059	0.375875	0.387568
DNAL4	-0.677558	-0.664169	-0.657922	-1.26187	-1.26185	-1.26186	0.0418189	0.0623284	0.0716855	NA	NA	NA	NA	NA	NA	NA	NA	NA	NA	NA	NA
DNASE1L1	-0.56472	-0.461548	-0.649564	-0.861459	-0.866601	-0.969117	-1.06884	-0.962737	-0.961303	NA	NA	NA	NA	NA	NA	NA	NA	NA	NA	NA	NA
DNASE2	-1.26197	-1.26197	-1.26197	-0.648305	-0.962737	-0.962448	-1.26198	-1.26198	-1.26198	0.00109596	0.0785545	-0.17178	0.0934604	0.0369897	-1.26189	0.00162756	-0.035313	-0.0673684	-1.26192	-0.0618079	-0.0220122
DNLZ	0.141227	0.147853	0.151203	0.144638	0.14328	0.125937	0.100166	0.0980282	0.104534	-1.26195	-1.26195	-1.26195	0.0926234	-0.0331041	0.0153536	-1.26195	-0.351191	-1.26194	-1.26192	-1.26189	-0.029829
DNM1L	0.492525	0.488226	0.480904	0.49724	0.503012	0.495002	0.442788	0.447655	0.455516	0.314464	0.324371	0.314826	0.282368	0.237854	0.245767	0.312415	0.348411	0.341374	0.342187	0.30587	0.344983
DNM2	0.547021	0.534706	0.530909	0.456655	0.470746	0.463585	0.405331	0.399267	0.41168	0.977337	0.974494	0.969988	0.705266	0.560968	0.568914	0.450634	0.517317	0.517317	0.53324	0.508521	0.517317
DNM3	0.219002	0.223805	0.22577	0.155767	0.163803	0.159258	0.137486	0.142562	0.144186	NA	NA	NA	NA	NA	NA	NA	NA	NA	NA	NA	NA
DNMBP	0.0452498	0.0392701	0.043164	-0.860468	-0.96373	-0.85938	-0.452793	-0.462279	-0.452099	NA	NA	NA	NA	NA	NA	NA	NA	NA	NA	NA	NA
DNMT1	0.367661	0.363239	0.365706	0.509867	0.507651	0.503348	0.413048	0.394044	0.399412	0.20066	0.189462	0.185521	0.268371	0.246109	0.267003	0.392439	0.394824	0.394485	0.42223	0.417697	0.410904
DNMT3A	0.255704	0.244947	0.243144	0.215358	0.224381	0.216297	0.40861	0.40116	0.401447	NA	NA	NA	NA	NA	NA	NA	NA	NA	NA	NA	NA
DNMT3B	-1.26187	-1.26187	-1.26187	-1.26193	-1.2619	-1.26193	0.058765	0.0560338	0.0432358	NA	NA	NA	NA	NA	NA	NA	NA	NA	NA	NA	NA
DNPEP	0.458553	0.450813	0.448809	0.37237	0.375252	0.37482	0.355486	0.348007	0.355242	0.47848	0.479541	0.481972	0.405784	0.408803	0.436601	0.43922	0.348846	0.387313	0.427104	0.392946	0.469131
DNPH1	0.0245841	0.0286738	0.0184829	0.380367	0.383344	0.370675	0.166989	0.188394	0.166864	0.17181	0.136225	0.145825	-0.0065172	-1.26193	-1.26189	0.115416	0.00505341	0.047526	0.157499	0.130703	0.15196
DNTTIP1	0.222468	0.221525	0.228498	0.172914	0.165281	0.173784	0.199885	0.18585	0.174044	0.015815	-0.659019	-0.258116	-1.26194	-1.26193	-1.26189	-1.26195	-1.26193	-1.26194	-1.26192	-1.26189	-1.26191
DNTTIP2	0.385579	0.385579	0.382223	0.308111	0.313522	0.306636	0.438429	0.427787	0.420186	0.203664	0.150397	0.236898	0.169972	0.207952	0.210644	0.280453	0.249457	0.235125	0.288458	0.300273	0.300663
DOCK10	0.322959	0.318089	0.321157	0.262054	0.262953	0.262486	0.251385	0.25207	0.263185	0.415981	0.425074	0.43313	0.439453	0.409468	0.411142	0.421387	0.400094	0.438279	0.374225	0.381285	0.424834
DOCK11	0.390428	0.380582	0.384559	0.243971	0.242741	0.244232	0.274962	0.267168	0.279579	0.430196	0.44632	0.448091	0.44632	0.421262	0.414985	0.330185	0.349237	0.347415	0.222413	0.157404	0.216141
DOCK2	0.544519	0.536982	0.537331	0.464536	0.456655	0.455516	0.41549	0.406375	0.405867	0.642651	0.639496	0.638235	0.653518	0.578412	0.580213	0.559265	0.540832	0.504551	0.556345	0.565429	0.561319
DOCK3	0.12075	0.120135	0.115886	0.0582649	0.0383239	0.0592692	-1.26198	-1.26198	-1.26198	NA	NA	NA	NA	NA	NA	NA	NA	NA	NA	NA	NA
DOCK5	-0.767374	-0.856245	-0.858933	0.0410649	0.0443199	0.0444752	-1.16495	-1.164	-0.967658	NA	NA	NA	NA	NA	NA	NA	NA	NA	NA	NA	NA
DOCK8	0.40922	0.400001	0.400497	0.338376	0.334484	0.335655	0.317154	0.30561	0.30876	0.518218	0.525994	0.527561	0.533783	0.509624	0.505362	0.433712	0.475853	0.474367	0.467289	0.442898	0.401636
DOCK9	-1.06629	-1.07043	-0.963833	-0.00903807	-0.00781148	-0.011589	-0.0281733	-0.00118855	0.00288173	0.198517	0.178045	0.161892	0.218595	0.16515	0.170719	0.188458	0.230453	0.190751	-0.0598761	0.114674	-0.0469766
DOHH	-0.642896	-0.456512	-0.466429	0.26235	0.272306	0.270322	0.280623	0.310262	0.265602	-0.646409	-1.26195	-0.00023962	0.00906101	-1.26193	-1.26189	0.17847	0.0658049	0.168212	0.23361	0.221897	0.283666
DOK1	0.169965	0.164128	0.162886	0.15748	0.161757	0.155628	0.150295	0.145762	0.155295	0.0560661	0.0842947	0.0166702	0.0964501	0.0714659	0.124869	-1.26195	-0.469942	-0.153848	-1.26192	0.00828802	-1.26191
DOK2	0.305502	0.29849	0.303547	0.387812	0.383822	0.385095	0.187008	0.17758	0.167608	0.366627	0.36333	0.369791	0.389183	0.403737	0.379283	0.295473	0.304076	0.26342	0.268371	0.271683	0.278786
DOLPP1	-1.26197	-1.26197	-1.26197	-1.26186	-1.06488	-1.26185	-1.26198	-1.26198	-1.26198	NA	NA	NA	NA	NA	NA	NA	NA	NA	NA	NA	NA
DONSON	0.0904353	0.0915834	0.0962763	0.196933	0.18047	0.191297	-1.26198	-1.26198	-1.26198	NA	NA	NA	NA	NA	NA	NA	NA	NA	NA	NA	NA
DOP1A	0.00832742	-0.0027033	0.00349764	-1.26191	-1.2619	-1.26191	-1.2619	-1.2619	-1.2619	NA	NA	NA	NA	NA	NA	NA	NA	NA	NA	NA	NA
DOP1B	0.0688085	0.0632671	0.0637059	-0.85797	-0.681247	-0.85905	-0.0168355	-0.015738	-0.0177383	-0.668611	-1.15098	-1.26195	-1.26194	-1.26193	-1.26189	-1.26195	-1.26193	-1.26194	-1.26192	-1.26189	-1.26191
DOT1L	-0.446483	-0.444901	-0.00444058	-1.26192	-1.26193	-1.26193	-0.0436769	-0.0364539	-0.241203	NA	NA	NA	NA	NA	NA	NA	NA	NA	NA	NA	NA
DPAGT1	0.124719	0.120833	0.126965	-0.0383217	-0.000679451	-0.0052244	0.115483	0.106353	0.113343	NA	NA	NA	NA	NA	NA	NA	NA	NA	NA	NA	NA
DPCD	-0.352246	-0.44867	-0.448181	0.0855727	0.0896432	0.0822675	-0.0499327	-0.0257544	-0.0227734	NA	NA	NA	NA	NA	NA	NA	NA	NA	NA	NA	NA
DPF2	0.426913	0.419917	0.412127	0.371568	0.38607	0.37277	0.468	0.454552	0.447655	0.15668	0.194818	0.201362	0.137336	0.16956	0.166095	0.133614	0.168619	0.149056	0.0803656	0.098108	-0.0047994
DPH1	0.0372864	0.0419038	0.0598074	-0.0703849	-0.16919	-0.241343	0.0384915	0.0304121	0.0419992	-1.26195	-1.26195	-1.26195	-1.26194	-1.26193	-1.26189	-1.26195	-1.26193	-1.26194	-1.26192	-1.26189	-1.26191
DPH2	2.07679e-06	0.0343583	0.0468353	0.125498	0.119627	0.119234	0.248806	0.25076	0.249021	-1.26195	-1.26195	-0.455186	-1.26194	-1.26193	-1.26189	0.0376182	0.013887	-0.0365076	-1.26192	-1.26189	-1.26191
DPH3	-1.26197	-1.26197	-1.26197	0.0524531	0.0607858	0.0591699	-1.26198	-1.26198	-1.26198	NA	NA	NA	NA	NA	NA	NA	NA	NA	NA	NA	NA
DPH5	0.352248	0.349625	0.346558	0.290464	0.282526	0.281462	0.279668	0.285309	0.287951	-1.26195	-1.26195	-0.454754	-0.655135	-0.0506875	-1.26189	-1.26195	0.046656	-1.26194	-1.26192	-1.26189	-1.26191
DPH6	0.0154118	0.021377	0.0305208	0.171255	0.174242	0.167953	0.199387	0.186238	0.203854	NA	NA	NA	NA	NA	NA	NA	NA	NA	NA	NA	NA
DPH7	-0.058753	-0.153144	-0.24538	0.061563	0.0617491	0.0593718	0.0737592	0.0770504	0.0768844	-0.642823	-0.253734	-1.26195	-1.26194	-1.26193	-1.26189	-1.26195	-1.26193	-1.26194	0.00568956	0.0765847	0.0448451
DPM1	0.452914	0.444647	0.445888	0.333228	0.360757	0.341045	0.31032	0.316574	0.317554	0.152625	0.149845	0.157747	0.15332	0.109359	0.190751	0.146984	0.146738	0.11299	0.0813351	0.0526871	0.098108
DPM3	-1.26197	-1.26197	-1.26197	0.301313	0.322959	0.310664	-1.26198	-1.26198	-1.26198	0.149167	0.165254	0.156411	0.198517	0.190572	0.145955	0.0878673	0.0759319	0.0625543	0.114175	0.122931	0.113327
DPP3	0.553259	0.535553	0.52741	0.435356	0.458218	0.443387	0.500638	0.489432	0.492525	0.384129	0.377098	0.362757	0.427869	0.402868	0.391936	0.412889	0.426794	0.440432	0.425431	0.430823	0.442266
DPP4	0.323893	0.31896	0.314821	0.24504	0.21572	0.225104	0.24449	0.228498	0.23788	0.334898	0.335455	0.340061	0.377493	0.396868	0.385877	0.292076	0.332456	0.306072	0.282453	0.300824	0.299204
DPP7	0.0649712	0.0699152	0.074725	-0.0364539	-0.011589	-0.0185495	0.0419038	0.0428576	0.0414689	3.32331	4.02398	4.46003	1.94533	4.02398	3.78567	1.6228	1.86145	2.07831	2.1155	2.21958	2.21958
DPP8	0.162728	0.15659	0.153229	0.115357	0.12075	0.118576	0.106196	0.103621	0.0945849	NA	NA	NA	NA	NA	NA	NA	NA	NA	NA	NA	NA
DPP9	0.261056	0.256473	0.254942	0.193703	0.18793	0.194011	0.201772	0.197367	0.2014	0.0642772	0.0302696	-0.0500767	0.22543	0.227019	0.178171	0.109759	0.0827798	0.0185328	0.0508441	0.0543203	0.023741
DPY19L1	0.0781735	0.0845866	0.0750712	-0.00548811	-0.00128873	0.00349764	-0.359685	-0.467126	-0.460282	NA	NA	NA	NA	NA	NA	NA	NA	NA	NA	NA	NA
DPY19L3	0.0188942	0.0184082	0.00611017	-1.26196	-1.26195	-1.26195	-0.452099	-0.446712	-0.448181	NA	NA	NA	NA	NA	NA	NA	NA	NA	NA	NA	NA
DPY19L4	-0.766961	-0.857556	-0.475188	-1.26197	-1.26196	-1.26197	-0.667454	-0.655665	-0.658747	NA	NA	NA	NA	NA	NA	NA	NA	NA	NA	NA	NA
DPY30	-1.26197	-1.26197	-1.26197	-0.64785	-1.26185	-0.645118	-1.26198	-1.26198	-1.26198	0.177848	0.124869	0.163537	0.0557459	0.125131	-0.0227133	-1.26195	-1.26193	-0.00443531	0.139473	0.485723	0.371366
DPYSL2	0.641006	0.614791	0.611733	0.718164	0.720417	0.733096	0.50366	0.506859	0.52638	0.485723	0.448953	0.451878	0.48383	0.463807	0.512143	0.415981	0.413565	0.432855	0.326367	0.366454	0.329077
DR1	0.0810939	0.118398	0.125613	0.370074	0.351607	0.364867	0.275667	0.278971	0.231767	0.280048	0.249363	0.256905	0.189792	0.238107	0.257766	0.288838	0.263212	0.271277	0.302569	0.288838	0.278889
DRAP1	0.41549	0.435951	0.438256	0.264857	0.266956	0.257008	0.422658	0.417984	0.40598	0.263509	0.254069	0.278545	0.195197	0.258008	0.252327	0.200026	0.196305	0.192731	0.305612	0.327106	0.291006
DRG1	0.414146	0.403939	0.409109	0.459163	0.461586	0.453082	0.528176	0.51326	0.505734	0.208165	0.21572	0.207665	0.185613	0.105737	0.167132	0.286537	0.326519	0.311831	0.376245	0.319665	0.337145
DRG2	0.406375	0.405745	0.405033	0.411895	0.419307	0.410672	0.389563	0.387812	0.402798	0.125519	0.191035	0.186279	0.230994	0.162541	0.212988	0.29382	0.254546	0.25344	0.178753	0.0448451	0.160295
DROSHA	0.0743449	0.0804872	0.0717987	0.0741024	0.0721682	0.0705113	0.0583621	0.0501218	0.0544516	NA	NA	NA	NA	NA	NA	NA	NA	NA	NA	NA	NA
DSCC1	-0.556535	-0.644847	-0.969117	0.191721	0.151614	0.180889	-0.0218538	-0.166397	-0.0432544	NA	NA	NA	NA	NA	NA	NA	NA	NA	NA	NA	NA
DSN1	-0.451148	-0.453925	-0.250391	0.144186	0.147107	0.141036	-1.26198	-1.26198	-1.26198	0.0946482	0.00936275	0.0314861	0.046656	0.0339569	0.0798991	-0.0468124	-0.162134	0.0617678	-0.352006	-0.150016	-1.26191
DSP	-0.148513	-0.0391192	0.0542474	-1.26189	-1.26194	-1.26193	0.00961779	0.00690408	-0.0250397	0.0861036	0.0305545	0.200566	0.176981	0.215168	0.176981	0.0472445	0.104197	0.0451202	0.0596059	0.0874754	-1.26191
DST	-1.26186	-1.26184	-1.26185	-0.663046	-0.655531	-0.605525	-1.26192	-1.26192	-1.26192	-1.26195	-1.26195	-1.26195	0.255283	-1.26193	0.129076	-0.0429405	-0.0454544	0.109681	0.00733688	0.177958	-1.26191
DSTN	0.182595	0.178732	0.168435	0.418411	0.418865	0.420061	0.342231	0.318291	0.343181	0.310372	0.29657	0.313062	0.308464	0.381285	0.371614	0.285427	0.279452	0.258926	0.261867	0.247903	0.247667
DTD1	0.385882	0.392529	0.3943	0.242634	0.267705	0.254194	0.349982	0.345819	0.347112	0.0858182	0.067093	0.100809	-1.26194	0.0754887	0.103554	-0.545278	-0.350921	-1.26194	0.0465521	0.196039	-0.00727652
DTD2	0.213644	0.227116	0.221869	0.191815	0.206931	0.193386	0.175053	0.205362	0.217395	NA	NA	NA	NA	NA	NA	NA	NA	NA	NA	NA	NA
DTL	-1.26197	-1.26197	-1.26197	-0.0253632	-0.0477277	-0.0485138	-0.134031	-0.445056	-0.648528	NA	NA	NA	NA	NA	NA	NA	NA	NA	NA	NA	NA
DTNB	-0.405247	-0.46007	-0.453428	-1.2619	-1.26188	-1.26188	-1.26189	-1.26188	-1.26188	NA	NA	NA	NA	NA	NA	NA	NA	NA	NA	NA	NA
DTNBP1	-0.64768	-0.348282	-0.350368	-0.446712	-0.468243	-0.457169	-0.676957	-0.959171	-0.861611	0.0926234	0.177703	0.134516	0.0891885	0.132839	0.0638513	-0.0478957	-1.26193	-0.643019	-1.26192	-1.26189	-1.26191
DTWD1	-0.246795	-0.656076	-0.669265	-1.262	-1.262	-1.262	0.0173981	0.0224845	0.019254	NA	NA	NA	NA	NA	NA	NA	NA	NA	NA	NA	NA
DTX2	0.0157395	0.0114387	0.00269397	-0.649193	-0.55839	-0.650288	0.0266587	0.0264333	0.0229026	NA	NA	NA	NA	NA	NA	NA	NA	NA	NA	NA	NA
DTX3	-0.65807	-0.653377	-0.64768	-0.0326841	-0.00674602	-0.0356825	-0.454963	-0.254182	-0.241974	NA	NA	NA	NA	NA	NA	NA	NA	NA	NA	NA	NA
DTX3L	0.197815	0.198004	0.196417	0.259201	0.250703	0.255445	0.219709	0.203035	0.219092	0.190925	0.208361	0.22534	0.226029	0.245313	0.2307	0.388523	0.363656	0.374794	0.311997	0.324516	0.316289
DTYMK	0.32411	0.313137	0.312944	0.420918	0.414995	0.416148	0.48639	0.501181	0.491557	0.0947362	0.116925	0.0173921	0.173352	0.183012	0.151775	0.122591	0.0769892	0.038555	0.180862	0.194626	0.180706
DUS1L	0.0959332	0.0830639	0.0723232	0.0897592	0.0919312	0.0866663	0.114656	0.125865	0.120833	-0.000410329	-0.15644	0.00492561	-1.26194	-1.26193	-0.0663663	-0.0425492	-1.26193	0.00394308	0.135353	0.0802274	-0.0314403
DUS2	0.0407133	0.0445484	0.0376546	0.0834279	0.0905099	0.0831389	0.138537	0.132713	0.137611	NA	NA	NA	NA	NA	NA	NA	NA	NA	NA	NA	NA
DUS3L	0.340476	0.323659	0.331721	0.253064	0.258913	0.255903	0.268219	0.252387	0.248644	0.00733688	0.0290324	0.00365158	-0.241323	0.00828802	0.0862326	0.104686	0.0680687	0.0493526	0.0718615	0.148619	0.191229
DUS4L	0.039714	0.0446154	0.040567	0.00611017	0.00749177	-0.00128873	0.131926	0.143581	0.150112	NA	NA	NA	NA	NA	NA	NA	NA	NA	NA	NA	NA
DUSP11	0.16184	0.156413	0.149932	0.0819585	0.0727128	0.0793732	0.178957	0.153684	0.135345	-0.24446	-0.0281404	-0.00727652	0.0660298	-1.26193	-1.26189	-0.685327	0.0091946	0.0745479	-1.26192	-1.26189	-1.26191
DUSP12	0.246003	0.253866	0.238044	-0.0683321	-0.0481557	-0.0580941	0.0788816	0.0786422	0.0725187	-0.272782	-0.00501924	0.0286601	0.0101138	0.0888724	0.0855112	0.189077	0.134312	0.115761	0.132738	0.202813	0.0933638
DUSP19	0.0856938	-0.0226425	-1.26197	0.072238	0.0841096	0.0787908	0.0429413	0.0483979	0.0633435	NA	NA	NA	NA	NA	NA	NA	NA	NA	NA	NA	NA
DUSP22	-1.06666	-0.660533	-1.06629	0.0256678	0.012474	0.00229451	0.108606	0.141546	0.155628	NA	NA	NA	NA	NA	NA	NA	NA	NA	NA	NA	NA
DUSP23	-0.446104	-0.350648	-0.336881	0.0480751	0.061563	0.0721682	-1.26198	-1.26198	-1.26198	-0.860719	-0.655135	-1.26195	-0.354692	-1.26193	-1.26189	-1.26195	-0.0136647	-1.26194	-1.26192	-1.26189	-0.244943
DUSP28	-0.459617	-0.45991	-0.355969	-1.26197	-1.26197	-1.26198	-1.26184	-0.648693	-1.26183	NA	NA	NA	NA	NA	NA	NA	NA	NA	NA	NA	NA
DUSP3	0.0774851	0.0728682	0.0688825	-0.0209204	-0.0193726	-0.00956132	0.130491	0.118398	0.128491	NA	NA	NA	NA	NA	NA	NA	NA	NA	NA	NA	NA
DUSP4	-1.26197	-1.26197	-1.26197	-1.262	-1.262	-1.262	0.00734505	-0.0247433	-0.0243467	NA	NA	NA	NA	NA	NA	NA	NA	NA	NA	NA	NA
DUSP5	-1.26197	-1.26197	-1.26197	-1.26184	-1.26184	-1.26183	0.13695	0.131484	0.147222	NA	NA	NA	NA	NA	NA	NA	NA	NA	NA	NA	NA
DUSP6	0.109467	0.0730903	0.0676721	0.0530507	0.0683102	0.0476714	-1.26188	-1.26189	-1.26189	NA	NA	NA	NA	NA	NA	NA	NA	NA	NA	NA	NA
DUSP7	-1.26197	-1.26197	-1.26197	0.0402735	0.0391778	0.0437364	-0.55839	-0.468243	-0.676957	NA	NA	NA	NA	NA	NA	NA	NA	NA	NA	NA	NA
DUT	0.292968	0.306562	0.308208	1.17071	1.15807	1.13397	0.73501	0.714155	0.761234	0.31291	0.304508	0.282933	0.272216	0.295611	0.321792	0.463423	0.474071	0.47848	0.494597	0.468175	0.460213
DVL1	-1.26197	-1.26197	-1.26197	-1.26196	-1.26197	-1.26196	-1.26189	-1.26187	-1.26188	NA	NA	NA	NA	NA	NA	NA	NA	NA	NA	NA	NA
DVL2	0.142103	0.138681	0.13601	0.0333409	0.0368002	0.0347355	0.134696	0.138267	0.137292	-1.26195	-0.966531	-0.754209	-0.049176	0.0365185	-0.0692839	-0.676752	-0.24175	-0.350728	-0.00776754	-1.26189	-0.165744
DXO	0.131301	0.117601	0.109577	0.0384915	0.0403694	0.0370076	0.113826	0.10526	0.106196	NA	NA	NA	NA	NA	NA	NA	NA	NA	NA	NA	NA
DYM	0.0852111	0.0734417	0.0782638	-0.0638975	-0.0221854	-0.154617	0.0689519	0.0646023	0.0541578	NA	NA	NA	NA	NA	NA	NA	NA	NA	NA	NA	NA
DYNC1H1	0.464536	0.457338	0.460014	0.399267	0.394453	0.396859	0.400639	0.388484	0.394162	0.837025	0.786536	0.825666	0.688802	0.67797	0.679583	0.725693	0.668237	0.689469	0.682312	0.669635	0.668237
DYNC1I2	0.327861	0.319684	0.321266	0.332325	0.338777	0.336153	0.359236	0.349258	0.3446	0.216774	0.276769	0.299706	0.291135	0.348846	0.355603	0.320239	0.306979	0.345785	0.264916	0.269689	0.264806
DYNC1LI1	0.402257	0.395546	0.394984	0.311167	0.299101	0.306773	0.330501	0.322887	0.327501	0.26681	0.267972	0.252057	0.287673	0.24504	0.259252	0.242572	0.267327	0.346871	0.195046	0.210462	0.172676
DYNC1LI2	0.0942438	0.0981676	0.09712	0.139513	0.151777	0.139783	0.219351	0.206274	0.207967	-0.0249026	-0.00307522	0.105949	-0.642542	0.0465521	0.0256419	0.163777	-0.0388402	0.117121	0.063722	0.0998607	0.133101
DYNLL1	0.345311	0.347231	0.296775	0.487979	0.51459	0.515275	0.347463	0.388377	0.349117	0.0382876	0.072182	0.098358	0.0531091	0.0393887	-1.26189	-1.26195	0.0222444	0.0118272	-1.26192	-1.26189	-1.26191
DYNLL2	0.469288	0.4832	0.418865	0.643989	0.666401	0.676761	0.220278	0.266748	0.262221	0.432855	0.43677	0.429349	0.308172	0.354026	0.298977	0.320801	0.323898	0.31291	0.242332	0.259903	0.249723
DYNLRB1	0.00413964	0.00253209	-0.00457799	0.211233	0.19164	0.215297	-0.349489	-0.0137332	-0.0340379	0.186524	0.171723	0.199621	0.152414	0.2178	0.228885	0.290583	0.242219	0.279329	0.230797	0.225659	0.283953
DYNLT1	0.289734	0.280273	0.274075	0.341175	0.329152	0.34778	0.195003	0.191041	0.186786	-1.26195	-1.26195	-1.26195	-1.26194	-1.26193	-1.26189	-0.256464	-0.0592148	-0.471644	0.1073	0.150667	0.152465
DYNLT3	-0.0516166	-0.0484122	-0.0263348	-0.247258	-0.0643703	-0.149483	0.139783	0.148576	0.162989	0.181793	0.189077	0.159082	0.184333	0.205626	0.214484	0.0975344	0.147392	0.0967892	0.0347612	0.0882127	-0.0232317
DYRK1A	0.197088	0.189536	0.191041	0.159004	0.152299	0.154336	0.175352	0.177113	0.180528	0.0693139	0.07275	0.0806192	-0.0103163	0.116686	0.157499	0.0062614	0.0429378	-0.0478957	-0.0397628	-0.00946536	-1.26191
DZIP3	-1.26197	-1.26197	-1.26197	-1.26192	-1.26194	-1.26192	-1.26184	-1.26183	-0.969382	NA	NA	NA	NA	NA	NA	NA	NA	NA	NA	NA	NA
E2F2	-0.449239	-0.256264	-0.44867	0.0120426	-0.00983047	0.00885162	-0.456512	-0.361496	-0.642896	NA	NA	NA	NA	NA	NA	NA	NA	NA	NA	NA	NA
E2F3	-1.26187	-1.26187	-1.26186	-1.26183	-0.965406	-1.26184	-1.26198	-1.26198	-1.26198	NA	NA	NA	NA	NA	NA	NA	NA	NA	NA	NA	NA
E2F4	-0.247258	-0.0335221	-0.0521293	0.184043	0.189661	0.181853	0.161069	0.162446	0.150725	NA	NA	NA	NA	NA	NA	NA	NA	NA	NA	NA	NA
E2F6	-0.646256	-0.561297	-0.46007	-1.262	-1.262	-1.262	-1.26188	-1.26188	-1.26185	NA	NA	NA	NA	NA	NA	NA	NA	NA	NA	NA	NA
E2F8	-1.26197	-1.26197	-1.26197	0.0214917	-0.0198523	0.0179844	-1.26198	-1.26198	-1.26198	NA	NA	NA	NA	NA	NA	NA	NA	NA	NA	NA	NA
E4F1	-0.0226425	-0.0173413	-0.0194946	-1.262	-1.262	-1.262	-0.244855	-0.246515	-0.239571	NA	NA	NA	NA	NA	NA	NA	NA	NA	NA	NA	NA
EAF1	-1.26187	-1.26187	-1.26187	0.124939	0.121603	0.126025	0.211486	0.205428	0.190834	-1.26195	-1.26195	-1.26195	-1.26194	-1.26193	-1.26189	-1.26195	-1.26193	-1.26194	-1.26192	-0.0106937	-1.26191
EAPP	0.122229	0.129338	0.123679	0.0123925	0.0273917	0.0223577	0.242817	0.233028	0.221438	NA	NA	NA	NA	NA	NA	NA	NA	NA	NA	NA	NA
EARS2	0.206503	0.19915	0.200955	0.0585483	0.0575579	0.0580551	0.103271	0.105586	0.107717	0.0453665	-0.0384181	0.0560661	-1.26194	-0.0345768	-1.26189	-1.05232	-0.15119	-0.642688	-0.158875	-0.0135045	-1.26191
EBAG9	0.256655	0.277697	0.256739	0.137018	0.132713	0.137224	0.23788	0.245125	0.25233	NA	NA	NA	NA	NA	NA	NA	NA	NA	NA	NA	NA
EBF3	-1.26197	-1.26197	-1.26197	-1.262	-1.262	-1.262	0.280565	0.2669	0.257853	NA	NA	NA	NA	NA	NA	NA	NA	NA	NA	NA	NA
EBNA1BP2	0.387043	0.389003	0.376444	0.42365	0.402489	0.413984	0.543438	0.529458	0.522966	0.265552	0.246957	0.255687	0.170213	0.210389	0.251608	0.269689	0.247285	0.258809	0.27971	0.284935	0.302975
EBP	0.265023	0.250625	0.258379	0.233474	0.250057	0.240589	0.199728	0.183496	0.195952	0.241597	0.259041	0.26545	0.142273	0.0939496	0.1893	0.176138	0.212988	0.191934	0.145955	0.197276	0.178878
EBPL	0.260351	0.26266	0.282046	-0.0521293	-0.150758	-0.150224	-1.26198	-1.26198	-1.26198	NA	NA	NA	NA	NA	NA	NA	NA	NA	NA	NA	NA
ECD	0.127832	0.123484	0.12689	0.139336	0.125865	0.129122	0.289044	0.286062	0.280273	-1.26195	-1.26195	-1.26195	-1.26194	-1.26193	-1.26189	-0.0379706	-1.26193	-1.26194	0.199371	0.212851	-0.0104894
ECE1	-1.26184	-1.17976	-1.164	-0.359685	-0.354366	-0.358809	-0.0477277	-0.248816	-0.25464	NA	NA	NA	NA	NA	NA	NA	NA	NA	NA	NA	NA
ECE2	0.0704155	0.0701537	0.0638848	0.0556686	0.0613069	0.0534785	0.274864	0.276064	0.279779	NA	NA	NA	NA	NA	NA	NA	NA	NA	NA	NA	NA
ECH1	0.25346	0.263973	0.272777	0.252525	0.251559	0.249215	0.186938	0.18925	0.205362	0.497601	0.489976	0.516913	0.495412	0.505362	0.49851	0.407461	0.419624	0.423471	0.433374	0.495412	0.417393
ECHDC1	0.228269	0.217785	0.221438	-0.000125366	-0.0159833	-0.0192451	0.140821	0.150388	0.148576	0.336608	0.364251	0.37095	0.32011	0.329642	0.357133	0.317191	0.355115	0.355873	0.300824	0.300663	0.28789
ECHDC2	-1.26197	-1.26197	-1.26197	-0.669265	-0.652036	-0.684858	-1.26198	-1.26198	-1.26198	0.0601291	0.0310252	0.0175505	0.0406582	-0.0124711	-0.0414476	-1.26195	-1.26193	-1.26194	-1.26192	-1.26189	-1.26191
ECHS1	0.546013	0.543686	0.551149	0.30876	0.310558	0.304725	0.395546	0.397141	0.395132	0.375024	0.406358	0.389402	0.361662	0.399177	0.439002	0.389183	0.396117	0.425431	0.35365	0.299706	0.406769
ECI1	0.329152	0.357333	0.369371	0.285309	0.255259	0.245925	0.377529	0.372909	0.38627	0.203473	0.250518	0.214136	0.169759	0.214758	0.236078	0.233326	0.20247	0.166367	0.180068	0.187417	0.153038
ECI2	0.249284	0.246124	0.251309	0.183109	0.178258	0.183694	0.179781	0.18598	0.181374	0.203559	0.24775	0.241459	0.238461	0.185742	0.17064	0.116787	0.186524	0.0987242	0.0996776	-0.0225287	-0.24043
ECM1	-0.352994	-0.258609	-0.351286	0.340106	0.345819	0.326888	-0.34879	-0.452099	-0.405247	NA	NA	NA	NA	NA	NA	NA	NA	NA	NA	NA	NA
ECPAS	0.216469	0.208896	0.209378	0.356216	0.356077	0.361326	0.265111	0.26266	0.273864	0.210462	0.203174	0.232826	0.186687	0.0898649	0.0754887	0.305288	0.283407	0.307719	0.262568	0.324214	0.324214
ECSIT	0.197036	0.195188	0.192869	0.157013	0.161595	0.154517	0.18536	0.189906	0.196992	NA	NA	NA	NA	NA	NA	NA	NA	NA	NA	NA	NA
ECT2	-1.2619	-1.2619	-1.26189	0.0854871	0.0854871	0.0864996	-1.26192	-1.26192	-1.26193	-1.26195	-1.26195	-1.26195	-1.26194	-1.26193	-1.26189	-1.26195	-1.26193	-1.26194	-1.26192	-1.26189	-1.26191
EDC3	0.237962	0.236387	0.240817	0.266467	0.267246	0.271407	0.244758	0.24189	0.244232	0.139473	0.108505	0.0448451	0.0857132	0.1017	0.0559373	0.185814	0.135778	0.209279	0.177392	0.134692	0.214251
EDC4	0.316502	0.309855	0.309127	0.326555	0.33699	0.333228	0.302777	0.300335	0.301837	0.365312	0.334898	0.383856	0.365691	0.325579	0.334551	0.389789	0.401404	0.396868	0.396635	0.358729	0.38336
EDEM1	-0.644497	-0.645329	-0.454663	0.0862705	0.0950186	0.101097	0.0607858	0.049085	0.0568851	NA	NA	NA	NA	NA	NA	NA	NA	NA	NA	NA	NA
EDEM2	-0.643306	-0.644298	-0.468663	-0.35375	-0.352994	-0.446104	-0.648435	-0.675337	-0.650288	NA	NA	NA	NA	NA	NA	NA	NA	NA	NA	NA	NA
[truncated: 6,531 more rows]
