# Supplementary material for: The Proteomic Landscape of Resting and Activated CD4+ T Cells Reveal Insights into Cell Differentiation and Function
Source: Int J Mol Sci. 2020 Dec 29;22(1):275. doi: 10.3390/ijms22010275 (PMC7795831; doi:10.3390/ijms22010275)
Supplement: Supplementary file 1 [file ijms-22-00275-s001.zip › Supplementary_table_6.xlsx]

## Sheet: Table6
Supplementary Table 6. Comparison of current CD4+ T-cell proteomics dataset with previous proteomic studies
GS	Current_Human_Resting _CD4+_D1_R1	Current_Human_Resting _CD4+_D1_R2	Current_Human_Resting _CD4+_D1_R3	Current_Human_Resting _CD4+_D2_R1	Current_Human_Resting _CD4+_D2_R2	Current_Human_Resting _CD4+_D2_R3	Current_Human_Activated_CD4+_D1_R1	Current_Human_Activated_CD4+_D1_R2	Current_Human_Activated_CD4+_D1_R3	Current_Human_Activated_CD4+_D2_R1	Current_Human_Activated_CD4+_D2_R2	Current_Human_Activated_CD4+_D2_R3	Rieckmann_CD4+_Activated_1	Rieckmann_CD4+_Activated_2	Rieckmann_CD4+_Activated_3	Rieckmann_CD4+_Activated_4	Rieckmann_CD4+_Resting_1	Rieckmann_CD4+_Resting_2	Rieckmann_CD4+_Resting_3	Rieckmann_CD4+_Resting_4	Gerner_CD4+_Resting_1	Gerner_CD4+_Resting_2	Gerner_CD4+_Resting_3	Gerne_CD4+_Activated_1_24h	Gerner_CD4+_Activated_2_24h	Gerner_CD4+_Activated_3_24h	Mitchell_CD4+_Resting_cells
AAAS	-0.404717	-0.456065	-0.508501	-0.866358	-0.880502	-0.706655	-0.201786	-0.678061	-0.397525	-0.186265	-0.13819	-0.294825	0.326608	0.43854	0.464302	0.318483	0.247989	0.405672	0.279825	0.296141	NA	NA	NA	NA	NA	NA	0.113039
AAK1	0.594944	0.563543	0.566641	0.501018	0.575605	0.567137	0.175355	0.155769	0.290818	0.126755	0.0475716	0.00523533	0.691109	0.721133	0.730215	0.570417	0.86495	0.863132	0.770237	0.980335	0.669564	0.695145	0.782723	0.652446	0.574702	0.595565	-0.171012
AAMP	-0.638757	-0.604229	-0.597448	-0.57338	-0.273766	-0.393648	-0.316221	-0.104767	-0.0999134	-0.475662	-0.370051	-0.381085	0.167695	-0.0216379	-0.0346425	0.270413	-0.232671	-0.0369282	-0.182905	0.0970716	-0.232336	-0.648493	-0.588746	0.321402	-0.183344	0.267686	-0.630084
AAR2	-0.998178	-1.08641	-0.912256	-0.817781	-1.25978	-1.28505	-0.827974	-0.68699	-0.742207	-0.113893	-0.47665	-0.231933	-0.350484	-0.16919	-0.420743	-0.444121	-0.344459	-0.578553	-0.408891	-0.504498	NA	NA	NA	NA	NA	NA	-0.109768
AARS	0.597461	0.534566	0.541952	0.476648	0.590739	0.510724	0.923248	0.825811	0.831518	0.810526	0.806302	0.734365	NA	NA	NA	NA	NA	NA	NA	NA	NA	NA	NA	NA	NA	NA	NA
AARS2	-0.522958	-0.606251	-1.52132	-0.423655	-0.328177	-0.427134	0.17925	-0.0351928	-0.221886	-0.414951	-0.568634	-0.598822	0.221223	0.282082	0.235457	0.135953	0.337509	0.3329	0.424443	0.270964	0.412898	0.491452	0.398521	0.22271	0.333611	0.250116	0.151927
AARSD1	-0.501506	-0.762042	-1.1913	-1.37611	-1.41545	NA	-0.285062	-0.308803	-0.497694	-0.359557	-0.165089	-0.359678	0.196361	0.164979	0.0753936	0.172633	-0.0338641	-0.0698604	-0.135644	-0.0902659	-0.497539	-0.276152	-0.381219	-0.196683	-0.416867	-0.0805833	NA
AASDHPPT	0.0475821	-0.057408	-0.0856272	0.0992271	-0.324882	-0.132091	-0.43113	-0.329657	-0.875226	-0.144775	-0.228138	-0.112719	0.283536	0.365239	0.268124	-0.0100804	0.315511	0.173368	0.200101	0.227516	-0.217296	-1.01215	-0.460935	-0.0136194	-0.551268	-0.0861734	-0.134259
AATF	-0.279136	-0.303314	-0.282981	-0.416851	-0.733059	-0.628616	-0.127741	-0.226171	-0.00374713	-0.322538	-0.19674	-0.178346	0.103101	0.0297243	0.125834	0.206447	0.163576	0.249933	0.264118	0.2129	NA	NA	NA	NA	NA	NA	-0.146981
ABAT	-0.608718	-0.786985	-0.741099	NA	NA	NA	-0.921207	-1.17425	-0.886826	-1.3178	-0.638303	NA	-0.987036	-0.414108	NA	-0.424302	-0.293181	-0.196399	-0.0249474	-0.262038	-0.429879	-0.806087	-0.597187	-0.709605	-0.707201	-0.87367	-0.0810732
ABCB7	-0.0540889	-0.193331	0.0458821	-0.035595	0.240376	0.143736	-0.136928	-0.089493	-0.126058	-0.16283	-0.545696	-0.411617	0.0405544	0.1544	0.265348	0.425897	0.32988	0.316501	0.326322	0.320279	NA	NA	NA	NA	NA	NA	-0.524219
ABCC1	0.197058	-0.201229	0.143738	-0.533935	-1.18936	0.112878	0.32746	0.374356	0.359831	-0.265169	-0.494984	-0.367658	0.128781	0.265181	0.200648	0.168577	0.0354625	0.0802511	0.0200373	-0.0485184	1.54224	-0.201878	0.704631	1.49385	1.65729	1.555	NA
ABCD3	NA	NA	-0.112655	-0.406378	-0.68777	-0.548433	-0.58639	0.314966	-0.292923	0.0455104	-0.134862	0.0386831	0.311212	0.41345	0.426042	0.307564	0.209823	0.123397	0.384666	0.0469676	NA	NA	NA	NA	NA	NA	-0.423893
ABCE1	0.57161	0.577406	0.571415	0.656853	0.553683	0.484158	0.597897	0.583397	0.542884	0.575466	0.580134	0.562293	0.964862	1.09448	1.12335	1.02241	0.910346	0.945373	0.807161	0.954662	0.547076	0.779358	0.718136	0.617989	0.721879	0.593678	0.615445
ABCF1	0.429699	0.542348	0.476539	0.63327	0.509447	0.659234	0.612543	0.417612	0.511017	0.482713	0.548917	0.627841	0.695077	0.979728	0.910457	1.07647	1.05318	0.908864	1.01653	0.972484	-0.598524	0.269529	-0.0145257	-0.319026	0.637302	0.190928	0.237345
ABCF2	0.00339399	0.0986262	-0.114971	0.0902425	0.117454	-0.0774705	0.409639	0.639161	0.553236	0.653365	0.574587	0.61341	0.746921	0.843818	0.861101	0.9009	0.461457	0.367422	0.244603	0.227211	-0.285909	0.284886	0.261402	0.388025	0.479704	0.48222	-0.146648
ABCF3	-0.156026	-0.0729338	-0.173295	-0.199095	-0.198395	-0.301623	0.0672651	-0.0558212	0.233341	0.139293	0.290021	0.252069	0.0955012	0.0304716	0.246951	0.254328	0.285465	0.290825	0.221162	0.286123	0.351386	0.125823	0.243573	0.304388	0.308981	0.389892	-0.0310474
ABHD10	0.409874	0.366776	0.467355	0.291314	0.338889	0.20843	0.22042	0.229155	0.211104	-0.0194884	0.0353365	0.0144692	NA	NA	NA	NA	0.940856	NA	NA	0.649681	0.579001	0.537721	0.557408	0.532831	0.375724	0.357978	0.942614
ABHD11	-0.71493	-0.949888	-0.612535	NA	-1.04997	NA	NA	NA	NA	-0.728507	NA	NA	0.154016	0.00685804	-0.162986	-0.1852	-0.158998	0.150405	-0.0211022	0.0147177	NA	NA	NA	NA	NA	NA	0.142099
ABHD12	-0.635283	-0.509736	-0.42921	-0.912122	-0.649953	-0.572448	-0.745648	-0.813259	-0.937371	NA	NA	NA	-0.542588	-0.183193	-0.0936174	-0.299615	-0.18249	-0.155696	-0.253153	-0.146925	NA	NA	NA	NA	NA	NA	-0.472799
ABHD14B	0.956518	0.987529	0.987287	1.09542	0.834788	0.755727	0.873808	0.835844	0.86555	0.685878	0.690315	0.468065	0.77927	0.682844	0.602045	0.615855	0.883251	0.960038	0.652481	0.979255	0.420192	0.182014	0.276565	0.480494	0.292115	0.371602	1.32383
ABHD16A	NA	NA	NA	-0.511235	-0.710066	NA	NA	NA	NA	NA	NA	NA	0.200679	0.164136	0.0442653	-0.154747	0.310957	-0.163891	0.182829	0.242751	NA	NA	NA	NA	NA	NA	-0.634476
ABI1	0.304127	0.311994	0.261252	0.294994	0.19017	0.191873	0.118306	0.147311	0.0109789	-0.379192	-0.550294	-0.240242	0.316822	0.237618	0.133898	0.187585	0.541002	0.665786	0.532885	0.584805	0.441504	0.62142	0.616765	0.338725	0.383029	0.299524	0.386284
ABI3	-0.112116	-0.151488	-0.2272	-0.173637	-0.377086	-0.413048	-0.310331	-0.563233	-1.01739	-0.381075	-0.261207	-0.16917	0.549662	0.363597	0.418774	0.383882	0.324256	0.202417	0.132686	0.328927	0.0458797	0.227117	0.125823	0.0126469	0.0637696	-0.117128	0.0201712
ABLIM1	0.377512	0.39479	0.405283	0.330682	0.296392	0.35623	-0.0123069	-0.0789966	-0.036703	-0.64691	-0.479186	-0.427203	NA	NA	NA	NA	0.80577	0.644682	NA	0.858277	-0.0342537	0.0182746	-0.245315	-0.746379	-0.87174	-0.881186	0.132857
ABR	-0.399689	-0.457229	-0.344873	-0.448451	-0.226555	-0.551016	-0.902752	-0.999927	-0.484906	-0.469249	-0.684677	-0.290033	NA	NA	NA	NA	NA	NA	NA	NA	0.0305372	0.201199	-0.342129	-0.17548	-0.073136	-0.230028	0.193631
ABRACL	1.09029	1.06795	1.04892	0.790692	0.44784	0.410047	0.933646	1.61129	1.212	1.20988	1.04662	1.1149	1.05655	0.949738	0.87143	0.711618	0.826311	0.958029	0.898431	1.02887	NA	NA	NA	NA	NA	NA	1.2116
ABRAXAS1	-0.519039	-0.60976	-0.420194	-0.672742	-0.500236	-0.485215	-0.914831	-0.771459	-0.87754	-1.02527	-0.743653	-0.850981	-0.475275	-0.361227	-0.421833	-0.686671	0.0147803	-0.0205688	-0.0274693	-0.0106144	NA	NA	NA	NA	NA	NA	-0.791303
ABRAXAS2	-0.0932263	-0.0164539	0.0124401	0.158362	0.101495	-0.153908	-0.0961187	-0.0946258	-0.135938	-0.477276	-0.339445	-0.584924	-0.0910661	0.0627996	0.036427	0.138167	0.166095	0.259885	0.174752	0.269503	0.109469	0.377316	0.321689	-0.00343625	0.117068	0.0625597	-0.0758847
ABT1	-1.11816	-0.135174	-0.208776	-0.579083	-0.873484	-0.336186	-0.540562	-0.529125	-1.39267	-0.871953	-0.838207	-0.697158	-0.0916763	-0.0277602	-0.146708	-0.25531	-0.0867718	0.0419819	-0.273946	-0.105987	NA	NA	NA	NA	NA	NA	0.139429
ACAA1	0.0665837	0.0669084	-0.0325469	-0.0862339	-0.251299	-0.298495	-0.0768544	-0.0946258	-0.074472	-0.0274269	-0.521697	-0.231933	0.571283	0.552902	0.502787	0.379474	0.3268	0.359527	0.250943	0.1936	0.250811	-0.169905	0.0356052	-0.122748	-0.0866887	0.084076	0.345046
ACAA2	0.720928	0.661523	0.695257	0.622866	0.635815	0.57645	0.749446	0.593496	0.79118	0.409196	0.414237	0.415578	1.50183	1.26599	1.25491	1.28827	1.23018	1.17487	1.11129	1.10539	1.32859	1.17461	1.11559	1.24505	0.926559	1.01973	0.411209
ACACA	0.374312	0.402421	0.444073	0.23542	0.149727	0.176585	0.239898	0.25252	0.250387	0.797272	0.871026	0.713934	0.109904	0.333591	0.379119	0.0834531	-0.481038	-0.406254	-0.858766	-0.537922	-0.984973	-0.459441	-0.339015	-0.507236	-0.402544	-0.621293	-0.85737
ACAD8	-0.175199	-0.161404	-0.135715	-0.282063	-0.255192	-0.252398	-0.366661	-0.399236	-0.452219	-0.851007	-0.697284	-0.712543	-0.0317194	-0.422543	-0.0660038	0.212027	0.41579	0.430953	0.436718	0.345679	0.387272	0.429485	0.408614	0.195551	0.25044	0.15429	-0.458718
ACAD9	0.0475821	-0.0370782	-0.0260691	0.0710731	-0.0759534	-0.0175564	0.0297026	0.0972031	0.0630703	0.0935751	-0.0360833	0.0144692	0.963966	0.514607	0.676649	0.568874	0.584313	0.642698	0.692112	0.705177	-0.211623	0.194294	-0.019847	-0.201878	-0.112327	-0.305735	-0.218952
ACADM	0.147139	0.282341	0.24652	0.39165	0.313372	0.387886	0.192765	0.231	0.262033	-0.0534272	0.143343	0.103861	0.822283	0.833509	0.679978	0.735276	0.734391	0.811762	0.710921	0.768796	0.449269	0.646797	0.50762	0.222033	0.549586	0.21994	0.614882
ACADS	0.193801	0.298875	0.223342	0.252798	0.303727	0.157624	0.236072	0.275952	0.299345	-0.0649166	-0.694003	0.132054	0.607507	0.526397	0.593356	0.443526	0.769179	0.91994	0.879786	0.730972	0.611724	0.410927	0.260132	0.309331	0.283672	-0.0148346	0.101069
ACADSB	0.206931	0.208009	0.172584	-0.0281787	0.0146085	-0.0280443	-0.199476	-0.605764	-0.165051	-0.0728523	-0.530438	-0.206455	0.707728	0.499187	0.505345	0.349694	0.585518	0.623328	0.683599	0.607506	0.292731	0.421067	0.43056	0.180913	0.18973	0.134453	0.445786
ACADVL	0.641675	0.691709	0.674029	0.575757	0.687167	0.830786	0.644149	0.707759	0.680435	0.739527	0.733798	0.743431	1.79041	1.81168	1.77065	1.40498	1.27497	1.18429	1.42161	1.06729	0.71463	0.789074	0.640945	0.501127	0.543745	0.508702	0.540194
ACAP1	0.705018	0.710429	0.719706	0.695586	0.626359	0.715077	0.652287	0.68046	0.702009	0.438761	0.380346	0.397414	0.89646	0.887737	1.00867	0.710857	1.00225	0.932612	0.864017	0.948397	1.16608	1.07526	1.12496	0.845861	0.899273	0.952698	0.519211
ACAP2	0.172741	0.195041	0.0523943	0.220387	0.231322	0.170515	-0.357132	-0.346427	-0.0179248	-0.704279	-0.556967	-0.50117	0.129446	0.165497	0.157127	-0.0132649	0.513289	0.317314	0.39062	0.391599	0.330559	0.481535	0.361684	0.0179825	0.288058	0.242618	0.343803
ACAT1	0.630774	0.542348	0.655864	0.710603	0.594696	0.63198	0.692185	0.479691	0.691705	0.935552	0.700564	0.668542	NA	NA	1.22321	NA	NA	NA	NA	NA	1.13074	1.15851	1.24505	0.8444	0.961115	0.997046	0.551314
ACAT2	0.531676	0.502	0.480015	0.344733	0.371024	0.36895	0.728203	0.707759	0.852143	0.634129	0.621937	0.621256	0.75785	0.683388	0.71036	0.742776	0.599701	0.669645	0.609706	0.732008	0.534628	0.696767	0.569161	0.516434	0.563025	0.445071	0.544543
ACBD3	-0.202152	-0.222467	-0.54879	-0.168432	-0.223377	-0.391385	-0.274716	-0.172774	-0.244987	-0.151589	-0.388395	-0.705609	0.321007	0.174424	0.339819	0.327187	0.132721	0.151858	0.215501	0.165307	0.296384	0.541564	0.563612	0.281793	0.383648	0.297186	0.247109
ACD	NA	NA	NA	-0.491692	-0.240773	-0.292647	-0.0706894	-0.16278	-0.118967	NA	NA	NA	-0.370706	-0.337301	-0.385244	-0.388635	-0.155453	-0.69248	-0.0568611	-0.0282362	NA	NA	NA	NA	NA	NA	-0.43728
ACIN1	0.7694	0.822924	0.813124	0.802016	0.768444	0.697779	0.652287	0.664617	0.669647	0.572464	0.546232	0.545592	0.85191	0.917937	0.953629	0.994145	1.08353	1.18429	1.28428	1.10738	-0.614771	-0.372798	-0.29919	-0.81287	-0.634879	-0.766653	0.850756
ACLY	0.638237	0.57477	0.571415	0.515239	0.619211	0.558915	1.06621	0.688558	0.780555	0.909053	0.889055	0.90197	1.28035	1.43327	1.4054	1.21476	0.766201	0.735519	0.754798	0.643597	0.591619	0.400244	0.180913	0.972843	0.900789	0.954444	0.322174
ACO1	0.25145	0.205516	0.28182	0.317587	0.105455	0.121046	-0.043256	-0.0585924	0.192314	-0.379192	-0.288715	-0.150644	0.258035	0.143836	0.356948	-0.00747596	0.546956	0.40046	0.44406	0.630042	0.178519	0.258682	-0.462354	-0.0735615	-0.142434	-0.0206479	0.0839963
ACO2	1.32144	1.36148	1.32982	1.38687	1.29293	1.22479	1.06621	1.17332	1.38814	0.859446	0.803955	0.740249	1.26907	1.38602	1.36379	1.42378	1.88819	2.01366	2.02404	1.93045	1.85417	1.39262	1.60171	1.47166	1.48334	1.45252	0.500413
ACOT1	0.16318	0.16567	0.204327	0.173828	0.256695	0.147352	-0.190638	-0.145156	-0.0342674	-0.0568464	-0.347336	-0.0452028	NA	NA	NA	NA	-0.693347	-0.467131	-0.587672	-0.770733	0.417212	0.582587	0.444236	0.146834	0.215229	0.059375	0.521226
ACOT13	0.124013	0.0421428	0.102854	-0.0585445	0.213427	0.13455	-0.117854	-0.104767	-0.102895	-0.151589	-0.121241	-0.0285269	0.2722	0.0894141	0.0335792	0.258399	0.25166	0.269508	0.0560358	0.0324121	0.180273	0.172004	0.0220818	-0.0477068	-0.0331975	0.00376106	0.710658
ACOT2	NA	NA	NA	NA	NA	NA	-0.594636	-1.28921	NA	NA	NA	NA	-0.0398958	-0.0568994	-0.00150615	0.199968	0.499855	0.498885	0.553261	0.36487	NA	NA	NA	NA	NA	NA	0.441255
ACOT7	-0.989936	-0.554779	-0.678219	-0.382611	-0.68777	-0.965981	0.22042	0.270879	0.30691	0.25849	0.17792	0.190166	0.92047	0.839932	0.733924	0.698101	NA	NA	NA	NA	-0.0195399	-0.492448	-0.0180389	0.410331	0.442809	0.306262	0.258374
ACOT8	-0.953174	-0.819742	NA	NA	NA	NA	NA	NA	NA	NA	NA	NA	-0.339823	-0.781127	-0.476273	-0.379663	-0.457819	-0.313192	-0.388574	-0.421609	NA	NA	NA	NA	NA	NA	NA
ACOT9	0.265435	0.161322	0.147647	0.338726	0.242722	0.15219	0.291886	0.163232	0.218731	0.00541859	0.175141	0.218819	0.145071	0.348962	0.185577	0.0493908	0.356897	0.53549	0.457756	0.465348	0.279431	0.321689	0.203118	0.101553	0.129764	0.0563686	-0.0628312
ACOX1	-0.824626	-0.531403	-0.435164	NA	-0.93506	NA	-0.222125	-0.037486	-0.00757301	-0.376979	-1.19359	-0.566283	0.132674	0.153358	0.191058	0.122847	-0.352302	-0.334371	-0.350347	-0.404805	-0.340518	-0.588183	-0.750759	-0.576738	-0.342654	-0.403449	-0.677214
ACOX3	-0.444968	-0.364475	-0.793192	0.173828	-0.223377	-0.144872	-0.175032	-0.45012	-0.074472	NA	NA	NA	0.470847	0.307818	-0.164699	0.266231	-0.166299	-0.0387178	-0.0836138	-0.169217	NA	NA	NA	NA	NA	NA	-0.2209
ACP1	0.487255	0.481513	0.518785	0.515239	0.425041	0.471068	0.229489	0.197814	0.211104	0.297415	0.193409	0.188323	0.813494	0.677578	0.604246	0.364135	0.436182	0.471294	0.543863	0.406126	0.460135	0.317062	0.382137	0.579001	0.573008	0.381378	0.583837
ACSF2	-0.6544	-0.686337	-0.6272	-0.795092	-1.30505	NA	-1.16587	-1.15112	-1.132	NA	-0.907741	-1.0865	-0.130232	0.0216506	0.0611696	-0.0976835	-0.284055	-0.178268	-0.266184	-0.277753	-0.167942	-0.0536568	-0.10109	-0.517072	-0.382447	-0.490887	-0.0289852
ACSF3	0.131847	0.168335	0.202145	0.18779	0.0906864	0.0103896	-0.188405	-0.0259245	-0.00942603	-0.376979	-0.401345	-0.297549	0.101173	0.149655	0.195045	0.036871	0.561857	0.643221	0.727145	0.641302	-0.088284	-0.0313762	-0.84802	-0.308783	-0.297	-0.251883	0.247373
ACSL1	NA	NA	-0.817569	NA	NA	NA	NA	-0.838005	-0.597888	NA	NA	NA	-0.0472938	-0.0289142	0.089747	0.0254932	-0.0771604	-0.279917	-0.0656642	-0.0716061	-0.788797	-0.246737	-0.978024	-0.707201	-0.701901	-0.864926	-0.86921
ACSL3	-0.399689	-0.263488	-0.465954	-0.186615	-0.255192	-0.572448	-0.278399	-0.259817	-0.342243	-0.796715	-0.683026	-0.590636	-0.0294084	0.0660117	0.309624	0.275102	0.227904	0.224268	0.247608	0.196299	-0.574117	-1.09078	-0.829863	-0.584798	-0.720072	-0.916181	-0.137845
ACSL4	-0.667276	-0.585144	-0.399556	-0.574342	-0.425086	-0.672918	0.0424668	-0.0186296	0.0474786	-0.115754	-0.29449	-0.123731	0.438892	0.710342	0.686544	0.345618	0.104116	0.0757522	0.197867	0.159737	-0.0995413	-0.032201	-0.0499895	0.475992	0.314125	0.279431	-0.0397799
ACSL5	-0.572817	-0.684128	-0.418322	-0.617483	-1.06779	-0.698092	-0.384435	-0.777426	-0.706682	-0.309031	-0.435758	-0.315574	0.0621211	-0.0909163	-0.106842	0.196038	0.129467	0.00157935	0.222825	0.113743	-0.99105	-1.06157	-0.881186	-0.664713	-0.659619	-0.640029	0.00626955
ACSS1	-0.246058	-0.170894	-0.31527	0.0468607	-0.114505	-0.315779	-0.646238	-0.743806	-1.08096	NA	-0.653854	NA	0.269566	-0.088092	0.152845	0.166386	0.33317	0.152967	0.41622	0.128593	-0.440196	0.0698978	-0.743542	-0.140247	-0.29324	-0.227733	-0.22829
ACTB	15.2793	15.304	15.2486	15.2109	19.6576	19.6576	19.6576	19.6576	19.6576	19.6576	19.6576	19.6576	NA	NA	NA	NA	NA	NA	NA	NA	4.65038	4.65038	4.65038	4.65038	4.65038	4.65038	4.56011
ACTBL2	0.982869	1.25497	0.488841	-0.324968	NA	-0.809561	0.316179	0.233389	0.254993	NA	-0.574299	0.429466	0.875423	0.369138	0.607668	0.566924	-0.57494	-0.303405	-0.6518	2.07881	3.57783	-0.705134	-0.830841	0.37792	0.234506	0.384935	1.90199
ACTC1	6.56047	4.92322	5.71483	3.78107	2.95167	3.25078	3.01772	2.85655	2.61709	2.06276	1.87535	1.7936	2.39804	2.02794	2.09019	1.97148	2.97506	1.78728	1.78932	2.32374	NA	NA	NA	NA	NA	NA	4.18014
ACTG1	-0.049743	-0.198428	-0.217785	0.0522582	0.352701	0.00109058	-0.33005	-0.520696	-0.194461	0.650705	0.520572	0.593662	NA	NA	NA	NA	0.456459	NA	NA	NA	0.426019	-0.413824	-0.426098	1.03813	0.402789	0.568384	4.42522
ACTL6A	0.483808	0.457692	0.491438	0.485781	0.442097	0.431063	0.717051	0.733387	0.691705	0.504168	0.464159	0.323132	0.600493	0.663323	0.723274	0.768404	0.787358	0.762515	0.738938	0.748257	-0.160442	-0.360568	-0.707849	-0.502475	-0.479481	-0.590987	0.323394
ACTN1	1.7387	1.79215	1.65324	1.5394	1.54702	1.8633	1.31327	1.42712	1.27572	1.12321	1.00351	1.0659	NA	NA	NA	NA	NA	2.42364	2.36875	2.31427	1.57606	1.57606	1.39262	1.47166	1.47421	1.51051	1.86347
ACTN4	2.0325	1.96544	1.95859	1.62929	1.64735	1.80795	1.729	1.47614	1.67494	1.89079	1.8639	1.94023	2.60726	2.13604	2.21191	2.91578	NA	NA	NA	NA	2.01892	1.89455	1.92174	1.71472	1.64588	1.66491	1.08931
ACTR10	-0.598994	-0.472324	-0.53161	-0.7109	-0.479692	-0.425066	-0.842609	-0.899659	-0.768056	-0.765933	-0.606119	-0.637838	-0.219232	0.02991	-0.205683	-0.183418	0.0810563	0.0467074	-0.186762	0.0920126	NA	NA	NA	NA	NA	NA	0.109402
ACTR1A	0.297719	0.168335	0.347	0.32616	0.213427	0.259558	0.309182	0.407937	0.393345	0.339367	0.308556	0.377811	0.686016	0.806614	0.720631	0.738751	0.675362	0.760033	0.602091	0.875176	0.446705	0.445071	0.40805	0.416238	0.303449	0.409837	0.53314
ACTR1B	0.44825	0.519105	0.538003	0.374632	0.556339	0.607384	0.744601	0.67086	0.740108	0.37447	0.236431	0.210636	0.103553	0.286646	0.0923825	-0.0104143	0.358501	0.468735	0.345493	0.438543	-0.053332	-0.416867	-0.0861734	0.131511	-0.548986	-0.563449	0.643601
ACTR2	1.51577	1.52462	1.54326	1.16797	1.38471	1.29591	1.00495	1.0066	0.939738	0.926624	1.0612	0.987311	1.86072	2.04561	2.00983	1.86195	1.92541	1.97654	1.86212	2.15886	1.79522	1.81673	1.54224	1.6802	1.88505	1.59576	1.41812
ACTR3	2.11991	2.12453	2.10523	2.05787	2.03565	2.08864	1.8153	2.37805	1.91477	1.54517	1.77789	1.47395	2.19527	2.17245	2.18397	2.18966	2.40516	2.75152	2.14268	2.98016	1.93156	1.87365	1.57061	1.79522	1.76592	1.70575	1.4565
ACTR5	-0.663354	-1.17956	-0.709408	-0.944038	-1.00511	NA	-0.931876	NA	NA	NA	NA	NA	-0.224265	-0.364908	-0.469092	-0.547612	-0.0409088	0.00851715	0.0703207	0.0616548	NA	NA	NA	NA	NA	NA	-0.35787
ACTR8	-0.955207	-0.971475	-0.6625	NA	NA	NA	NA	-0.7335	-0.328646	NA	NA	NA	-0.965576	-0.670845	-0.527499	-0.204868	-0.183809	-0.136928	-0.242098	-0.168576	NA	NA	NA	NA	NA	NA	-0.465731
ACYP1	-0.251793	-0.145283	-0.310284	-0.418635	-0.164784	-0.224025	-0.461553	-0.487699	-0.427184	-0.857527	-0.67288	-0.7018	0.325902	0.326935	0.280506	-0.202148	-0.219076	-0.138848	-0.211864	-0.0278441	NA	NA	NA	NA	NA	NA	0.701241
ADA	0.364981	0.348627	0.449845	0.73481	0.296392	0.196852	0.072564	0.147311	0.167614	0.172571	0.155657	0.247136	0.578824	0.513332	0.572841	0.597935	0.615402	0.721528	0.625967	0.873884	0.546453	0.6913	0.576127	0.35309	0.482679	0.322377	0.316091
ADA2	-0.566885	-0.525636	-0.723827	0.147363	-0.0759534	-0.0198688	-0.849003	-0.921172	-1.60406	NA	NA	-0.942861	-0.527145	-1.35769	-0.753834	-0.437206	-0.204073	-0.166097	-0.271604	-0.262951	-0.499869	1.58952	0.156437	-0.64313	-0.27907	-0.784682	-0.0148566
ADAM10	-0.194744	-0.0922922	-0.219573	0.1098	0.0102705	-0.0968212	-0.538444	-0.485619	-0.652713	-0.500962	-0.692344	-0.846665	0.294978	0.381546	0.49175	0.466837	0.135168	0.24227	0.384263	0.167437	-0.374407	-0.349995	-0.16468	-0.29324	-0.157287	-0.322817	-0.727994
ADAM8	NA	NA	NA	NA	NA	NA	NA	-0.925593	-0.78841	NA	NA	NA	-0.717839	-0.638751	-1.30621	-0.496957	-0.509584	NA	-0.426971	-0.623526	NA	NA	NA	NA	NA	NA	NA
ADAR	0.822683	0.832181	0.783824	0.952873	0.856885	0.804905	1.04681	0.906102	0.926939	0.672846	0.736666	0.762157	1.30569	1.33796	NA	NA	1.20541	1.39474	1.34387	1.22207	NA	NA	NA	NA	NA	NA	0.402737
ADARB1	-0.497243	-0.456065	-0.38672	-0.842759	-0.601608	-0.896556	-0.490199	-0.617551	-0.144114	NA	NA	NA	0.0711456	-0.236169	-0.0512332	-0.236925	-0.0732831	-0.0245907	-0.151951	-0.178368	NA	NA	NA	NA	NA	NA	-0.71622
ADD1	0.732779	0.731147	0.716676	0.730259	0.777295	0.791344	0.516137	0.595997	0.460091	0.52477	0.576439	0.639009	0.811984	0.80717	0.890274	0.987271	1.41355	1.33876	1.43365	1.42886	0.22271	0.596357	0.548175	0.697461	0.721879	0.64274	0.884935
ADD3	0.602019	0.587621	0.621662	0.777615	0.619211	0.796458	0.545405	0.590619	0.619082	0.20033	0.317979	0.269662	NA	NA	NA	NA	1.25442	NA	NA	NA	-0.0486744	0.206086	0.244177	0.010166	0.0497682	0.344423	1.23729
ADH5	1.0966	1.18474	1.17186	1.2195	1.05725	1.08385	1.15895	1.34324	1.37894	0.822759	0.675118	0.895609	0.908205	0.849455	0.535957	0.770179	1.11857	1.26793	0.695796	0.996768	1.24111	1.31561	1.18596	1.00915	0.935596	0.99835	1.17444
ADI1	-0.9747	-0.821917	-0.511877	-0.723611	-0.807786	-0.498335	-0.403735	-0.550951	-0.418945	NA	-0.47665	NA	0.530052	0.318494	0.247303	0.0415074	-0.428598	-0.301706	-0.98658	-0.4423	NA	NA	NA	NA	NA	NA	-0.430607
ADK	0.217662	0.269614	0.297588	0.248163	0.26354	0.27135	-0.0269781	-0.0162498	-0.316522	-0.0937811	-0.0212355	0.0729443	0.806341	0.712467	0.61192	0.383187	0.785235	0.613309	0.557327	0.814045	0.483678	0.55059	0.631204	0.294387	0.368761	0.39411	2.92512
ADNP	-0.124646	-0.177949	-0.18611	-0.126981	-0.160963	-0.137255	-0.344606	-0.446844	-0.253084	-0.165974	-0.374668	-0.449652	0.522322	0.391537	0.427891	0.446938	0.45755	0.506534	0.576395	0.443302	NA	NA	NA	NA	NA	NA	-0.370842
ADO	-0.834171	-0.429101	-0.569687	-0.707889	-0.736549	NA	-0.909341	-0.715518	-0.647333	-0.874042	-0.760757	-0.892193	-0.317493	-0.427207	-0.573378	-0.557872	-0.426666	-0.413174	-0.456425	-0.500067	-0.339808	-0.262827	-0.216283	-0.159253	-0.0978661	-0.0508964	-0.324467
ADPGK	-0.300335	-0.233831	-0.299924	0.0553975	-0.244008	-0.124392	0.100902	-0.0680104	0.15157	-0.344829	-0.153126	-0.20067	0.344826	0.373011	0.35877	0.197411	0.363689	0.489182	0.409622	0.41384	-0.105609	0.00568527	-0.374827	0.0106664	-0.21146	-0.134911	0.16122
ADPRHL2	0.457552	0.481513	0.499758	0.482329	0.352701	0.342701	0.404984	0.347934	0.419476	0.269361	0.17792	0.134174	NA	NA	NA	NA	NA	NA	NA	NA	NA	NA	NA	NA	NA	NA	NA
ADRM1	-0.209757	-0.0370782	-0.0198402	-0.115463	0.0526881	0.0145074	0.0297026	0.0654241	-0.011243	0.0935751	0.000292815	0.0503792	-0.0406186	0.194462	0.140669	0.0746693	0.127201	0.00214098	0.0206144	0.0431412	0.298199	0.136367	0.37792	-0.0825312	0.0149955	0.216995	-0.010116
ADSL	0.615265	0.571886	0.540208	0.636266	0.644143	0.5794	0.864461	0.830982	0.722709	0.737554	0.746934	0.843779	0.806961	0.938329	0.823052	0.739304	0.674134	0.693444	0.651906	0.691702	0.62142	0.80225	0.0477207	0.540073	0.573922	0.534628	0.456046
ADSS	0.144763	0.0770534	0.0692235	-0.139201	-0.00749462	0.00864022	0.136616	0.298324	0.387709	0.129448	0.240997	0.185836	NA	NA	NA	NA	NA	NA	NA	NA	NA	NA	NA	NA	NA	NA	NA
AEBP2	NA	NA	NA	NA	NA	NA	-1.23302	-1.42241	-1.23725	-0.789304	-0.784657	-0.837255	NA	NA	-1.05973	-0.852148	NA	-1.00887	NA	NA	NA	NA	NA	NA	NA	NA	NA
AFDN	NA	NA	NA	NA	NA	NA	-0.339662	-0.594182	-0.600275	0.0025958	-0.65671	0.120722	-0.036704	NA	0.0605643	NA	NA	NA	NA	NA	NA	NA	NA	NA	NA	NA	NA
AFF4	-0.91635	-0.733196	-0.757916	-0.752767	NA	NA	NA	NA	NA	-0.665409	-0.601654	-0.652182	-1.09691	-0.600841	-0.527817	-0.605124	-0.456875	-0.458874	-0.0767284	-0.0850469	NA	NA	NA	NA	NA	NA	-0.549583
AFG3L2	0.30915	0.203389	0.22704	0.292987	0.261121	0.235096	0.115553	0.237494	0.114208	-0.0728523	-0.067251	-0.310337	0.397676	0.544476	0.496773	0.578185	0.736436	0.808413	0.823487	0.784119	-0.00879231	-0.196683	-0.052474	-0.293706	-0.310594	-0.368668	0.374311
AFTPH	-0.749192	-0.454806	-0.455962	-0.632232	-0.550167	-0.659441	-0.58639	-0.418881	-0.434587	-0.951963	-0.423899	-1.36314	-0.0104735	-0.134024	-0.175493	-0.118145	-0.0432437	-0.131934	-0.0370522	-0.000287914	-0.16414	-0.489725	-1.01315	-0.230535	-0.240369	-0.235309	-0.15531
AGA	-0.186743	-0.235865	-0.371106	-0.458231	-0.164784	-0.287201	-0.495365	-0.466293	-0.571373	-0.979604	-0.915011	-1.17814	NA	NA	NA	-1.12888	-1.36374	-1.20889	NA	NA	-1.42055	-1.13568	-0.736914	-0.888825	-0.578237	-0.835041	NA
AGAP2	-0.308099	-0.370779	-0.460441	0.0877591	-0.208295	-0.106598	-0.839189	-0.773818	NA	-0.896985	-0.47665	-1.16285	0.191758	0.159839	0.188373	-0.025358	0.311921	0.252604	0.342278	0.240016	0.246085	0.0644389	0.458416	-0.214599	0.0382588	0.0773614	0.423577
AGFG1	0.24242	0.306263	0.267451	0.16205	0.0705427	0.0483972	0.0172346	0.163232	0.00457557	0.336216	0.269961	0.277973	0.329479	0.440369	0.150939	0.297391	-0.0293846	0.0937588	0.0182424	-0.0304267	0.32839	0.240248	0.258682	0.499563	0.357012	0.4538	0.425322
AGFG2	-0.199571	-0.317802	-0.249044	-0.194677	-0.3103	-0.498335	-0.535189	-0.431122	-0.501456	-1.13417	-0.689041	-0.664989	-0.548327	-0.506301	-0.394659	-0.553363	-0.27104	-0.26611	-0.654922	-0.402873	0.0360569	0.0209163	-0.00807215	-0.271114	-0.319344	-0.152888	-0.48877
AGK	0.417561	0.414812	0.438853	0.0433223	0.242722	0.273151	0.362099	0.445754	0.42511	0.550378	0.821786	0.646506	0.659746	0.791433	0.76449	0.715916	0.780456	0.629812	0.741724	0.67981	0.295994	0.246681	0.300429	0.242618	0.125327	0.17897	0.435465
AGL	0.364981	0.359433	0.224684	0.422478	0.34202	0.329167	0.296081	0.182007	0.0630703	0.220306	0.0993293	0.12592	0.402441	0.518727	0.597772	0.494008	0.828047	0.830349	0.677294	0.956612	-0.17759	-0.228227	0.0831434	-0.223367	-0.436569	-0.348995	0.794575
AGMAT	-0.277364	-0.361377	-0.403858	-0.168432	-0.397187	-0.425066	-0.324224	-0.183637	-0.9053	-0.364275	-0.638303	-0.617452	0.309843	0.22044	0.279588	-0.256791	0.0399675	0.362624	0.280789	0.318162	-0.267516	-0.661599	-0.463586	-0.335077	-0.497539	-0.443267	-0.513981
AGO1	0.0665837	0.101701	0.100383	0.19834	0.18018	0.0667383	-0.237089	-0.219655	-0.33854	0.00541859	-0.255613	-0.081731	0.234404	0.181906	0.15523	0.246503	0.711593	0.704459	0.58112	0.690754	NA	NA	NA	NA	NA	NA	NA
AGO2	0.269615	0.195041	0.342106	0.353581	0.253521	0.220976	0.118306	-0.0789966	0.00727119	0.0859833	0.260437	0.218819	0.0981664	0.19656	0.227245	0.184115	0.450522	0.440105	0.324532	0.376017	0.105233	0.315949	0.160034	0.109802	0.162296	0.113333	NA
AGO3	-0.649778	-0.618952	NA	-0.745908	-0.905475	-0.972536	-0.512545	-0.275192	-0.324306	-1.34151	-0.909968	NA	-0.658567	-0.285113	0.158543	-0.519549	-0.00925754	-0.0296818	-0.0648329	0.0536484	-1.02697	-0.432628	-0.570545	-0.957182	-0.976357	-0.601253	NA
AGPAT1	-1.11123	-1.03684	NA	-1.15871	NA	NA	-0.733206	NA	-0.675767	-0.558656	-0.653854	-0.8485	-0.547298	-0.373334	-0.589282	-0.797861	0.136514	-0.0977366	0.182564	0.148753	NA	NA	NA	NA	NA	NA	0.188433
AGPAT3	-0.424656	-0.379067	-0.484373	-0.700946	-0.561734	-0.413048	NA	NA	NA	NA	NA	NA	-0.136065	-0.0692535	0.200863	-0.446158	0.00530975	0.0432207	0.0265531	0.0154839	NA	NA	NA	NA	NA	NA	0.216647
AGPAT5	-0.284249	-0.424708	-0.31527	0.0171285	-0.372176	-0.340804	-0.371238	-0.379749	-0.328646	-0.877049	-1.12721	-0.837255	-0.073996	0.076661	0.0144735	-0.380092	0.215729	0.0446007	0.270215	0.041929	NA	NA	NA	NA	NA	NA	-0.101896
AGPS	-0.352702	-0.472324	-0.440443	-0.581884	-0.48186	-0.526772	0.0039685	0.0972031	0.124569	0.217649	-0.0232786	-0.0963305	0.446964	0.626934	0.581881	0.651441	0.043677	-0.00911544	-0.0900115	-0.0431819	-0.010535	-0.550277	0.0689792	0.0584395	0.335189	0.265328	0.0382865
AGTPBP1	-1.19657	-1.21662	NA	NA	NA	NA	-1.06189	NA	NA	NA	NA	NA	-0.476138	-0.534953	-0.221845	-0.606214	-0.450906	-0.427145	-0.415412	-0.441502	NA	NA	NA	NA	NA	NA	-0.537191
AGTRAP	-0.947779	-0.865069	NA	NA	-0.895755	-0.796562	NA	NA	NA	NA	NA	NA	NA	-0.835869	NA	-0.84081	-0.708985	NA	NA	-1.25343	-0.95847	-0.216749	-0.722716	-0.631101	-0.789719	-0.687411	-0.435873
AHCTF1	-0.192064	-0.289678	-0.28716	-0.04796	-0.188767	-0.118341	-0.0106144	-0.0715263	0.11131	-0.171003	-0.547559	-0.387303	0.499408	0.525816	0.510266	0.673516	0.651012	0.578888	0.615802	0.56923	NA	NA	NA	NA	NA	NA	-0.141224
AHCY	0.866841	0.896116	0.902079	1.06499	0.897158	0.840929	0.853096	0.796932	0.840883	0.734699	0.787572	0.713934	1.46564	1.46195	1.49594	1.31102	1.25292	1.22354	1.16238	1.4592	1.26115	1.2926	1.32013	1.1635	1.15277	1.23041	0.781545
AHCYL1	0.355413	0.243685	0.229073	0.317587	0.315398	0.342701	0.0499244	0.117895	0.0942771	-0.118094	0.103097	-0.0547716	0.517289	0.388988	0.231523	0.459594	0.43688	0.42088	0.545779	0.442213	0.886619	0.943214	0.855818	0.375724	0.694349	0.543745	0.426064
AHCYL2	-0.579712	-0.556774	-0.62442	-0.265308	-0.586746	-0.654925	-0.274716	-0.54722	-0.574089	-0.779757	NA	NA	-0.272999	-0.404155	-0.672953	-0.312593	-0.286515	-0.205899	-0.247196	-0.29577	0.288695	0.313713	0.404902	0.0329174	0.192452	0.157258	0.216341
AHNAK	3.36131	3.37123	3.26749	2.84988	2.59234	2.51011	1.79063	2.12959	2.02428	1.81162	1.30661	1.64459	1.48374	2.41424	2.42913	1.92217	3.36562	3.13665	2.33922	2.46184	1.32013	1.98431	2.46876	1.45252	1.72508	1.91112	0.534646
AHSA1	0.230802	0.329919	0.233672	0.405076	0.463256	0.439269	0.898754	0.633081	0.783758	0.852266	0.682418	0.657397	1.10192	1.04392	1.01021	0.977701	0.419895	0.486834	0.440641	0.446116	0.540073	0.233763	0.242618	0.848716	0.628187	1.05037	0.77964
AHSG	NA	NA	NA	NA	NA	NA	NA	NA	NA	-0.371427	-0.398556	-0.369774	0.739841	0.348721	0.177905	0.73052	0.0910692	-0.0779035	1.33219	0.790779	NA	NA	NA	NA	NA	NA	0.870868
AIDA	-0.290229	-0.0922922	-0.265501	-0.176666	-0.151712	-0.166947	-0.533014	-0.464203	-0.179613	-0.681987	-0.694003	-0.676725	-0.010121	-0.141762	0.0524058	0.127208	-0.0899726	0.230273	0.0261115	0.0272787	-0.0206479	0.249618	0.195551	-0.17427	-0.0201958	-0.114389	-0.277408
AIF1	-0.471507	NA	-0.431148	-0.745908	-0.757179	NA	NA	NA	NA	NA	NA	NA	NA	NA	-1.20849	-1.26453	NA	NA	-1.35806	NA	-0.818071	-1.36733	-0.684466	-0.817884	-0.978024	-0.942859	NA
AIFM1	0.594944	0.552215	0.595923	0.772327	0.722214	0.652603	0.504546	0.803619	0.630804	0.450281	0.188432	0.106148	0.895128	0.933462	1.04648	0.894662	1.07754	0.85819	1.20097	1.0001	0.781799	0.873721	0.820377	0.565363	0.521607	0.535725	0.384688
AIMP1	0.494017	0.513831	0.53065	0.4902	0.269833	0.292898	0.546773	0.566997	0.585462	0.530424	0.414237	0.482735	0.777441	0.880018	0.757848	0.852762	0.476763	0.42741	0.487599	0.568804	0.243039	0.573922	0.423091	0.538315	0.445828	0.524962	0.557255
AIMP2	-0.117042	0.00200779	-0.0198402	-0.0329793	-0.13573	-0.0511321	-0.0454318	-0.106848	-0.0888692	0.326393	0.308556	0.325369	NA	NA	0.557866	NA	NA	NA	NA	NA	-0.228227	-0.21773	-0.36211	0.323285	-0.00712842	0.244659	0.0299618
AIP	0.697708	0.698228	0.745076	0.65346	0.654071	0.595581	0.962038	0.60489	0.773202	0.630104	0.787572	0.671092	1.08614	0.900088	0.989543	0.860468	0.72086	0.768294	0.77266	0.786072	1.00515	0.944835	1.04279	0.935596	0.989121	0.935596	1.24361
AK2	0.926558	1.01577	0.98035	0.772327	0.927464	0.780416	0.787291	0.855539	0.890552	0.805709	0.729342	0.809622	1.35968	1.21522	1.1797	1.16189	1.173	1.33068	1.14776	1.25835	1.20328	1.21814	1.09261	0.99835	1.02765	0.961115	1.80986
AK3	0.340628	0.419665	0.342106	0.16205	0.371024	0.299423	0.0851712	0.160744	0.242176	0.0254348	-0.326832	0.0952738	0.218333	0.236366	0.40999	0.170551	0.560912	0.664338	0.561713	0.46286	0.30858	0.294879	0.403555	0.151564	0.00479322	0.076562	1.34644
AK4	NA	NA	NA	NA	NA	NA	-0.55506	-0.627439	NA	NA	NA	NA	0.47381	0.38348	0.404134	-0.0273448	-0.538801	NA	NA	NA	NA	NA	NA	NA	NA	NA	NA
AK5	-0.629225	-1.27779	NA	-0.933836	NA	NA	NA	NA	NA	NA	NA	NA	NA	NA	NA	NA	0.0510544	0.042836	0.127952	0.128023	NA	NA	NA	NA	NA	NA	-0.0545393
AK6	NA	NA	NA	NA	NA	NA	-0.205939	-0.282829	-0.120931	0.0455104	-0.122987	-0.081731	NA	-0.331427	NA	-0.461081	-0.568596	-0.681855	-0.566074	-0.606201	-0.462354	-0.491514	-0.0160797	-0.183695	0.224783	-0.208639	NA
AKAP11	-0.720977	-0.734742	NA	NA	NA	NA	NA	NA	-1.25811	NA	NA	NA	-0.0514874	0.328309	-0.0914461	-0.350712	0.0523452	0.143505	-0.0203239	0.198181	-0.789337	-0.486862	-0.5188	-0.757476	-0.65439	-0.841685	-0.459692
AKAP13	0.0851486	0.133797	0.0933519	0.216427	0.0465703	-0.0110394	-0.0411556	0.0715849	-0.129662	-0.263471	-0.347336	-0.147694	NA	NA	NA	NA	NA	NA	NA	NA	-0.112327	0.384229	0.336685	-0.0776503	0.25044	0.26201	0.353313
AKAP17A	-0.447755	-0.75616	NA	-0.406378	-0.486634	-0.599965	-0.717207	NA	-0.551409	-0.84145	-0.85542	-0.590636	-0.137581	0.18014	0.1273	0.11229	0.164331	0.194985	0.229146	0.220924	NA	NA	NA	NA	NA	NA	-0.341065
AKAP2	NA	-0.801804	NA	NA	NA	NA	-0.523022	-0.37468	-0.090015	-0.269203	-0.48999	-0.369774	0.0983816	0.0813664	0.272328	-0.0297406	-0.697066	NA	-1.09513	-1.20388	NA	NA	NA	NA	NA	NA	NA
AKAP8	-0.391888	-0.394301	-0.292713	-0.624177	-0.696935	-0.872717	-0.8079	-0.663198	-0.652713	-0.392002	-0.616915	-0.91638	0.292673	0.136248	0.29212	0.37593	0.183967	0.276417	0.11855	0.147458	NA	NA	NA	NA	NA	NA	-0.552831
AKAP8L	-0.0386783	0.00548717	-0.0630748	-0.165138	-0.0233286	-0.0399045	-0.22612	-0.0323904	-0.282575	-0.578587	-0.613062	-0.528007	0.00814995	-0.0444658	-0.193725	-0.0982665	0.0786887	-0.0948201	0.06204	-0.00210116	NA	NA	NA	NA	NA	NA	-0.710617
AKAP9	-0.549007	-0.402798	-0.312888	-0.382611	-0.836968	NA	-0.294252	NA	-0.595559	NA	-0.962429	-0.393955	0.0201379	0.0483789	0.0355528	0.140215	0.385293	0.557455	0.356966	0.529472	NA	NA	NA	NA	NA	NA	-0.35486
AKNA	-0.480053	-0.451639	-0.381796	-0.878985	-0.627281	NA	-0.374387	-0.346427	-0.591117	NA	-0.802012	-0.827369	0.0298995	-0.106165	0.13619	0.109152	0.498777	0.216574	0.419101	0.177075	NA	NA	NA	NA	NA	NA	0.0115503
AKR1A1	0.870319	0.834801	0.854774	0.797274	0.82689	0.81865	0.822616	0.825811	0.744159	0.801588	0.865564	0.680502	1.07678	0.983698	0.987977	0.755205	0.948662	1.00923	0.70962	0.887688	0.897932	0.886619	0.779358	0.737105	0.824883	0.781159	0.318267
AKR1B1	1.0404	1.04994	0.927805	1.09358	1.26605	1.32866	0.926157	0.839535	0.8831	0.606031	0.621937	0.596777	1.0705	0.956502	0.88956	0.750774	1.19957	1.26793	0.921755	1.20151	1.35338	1.37087	1.14628	1.09041	0.972843	1.09041	1.00546
AKR1C3	NA	NA	NA	-0.547684	-0.736549	-0.730284	-1.20926	NA	-0.753758	-0.891903	NA	-0.791654	NA	NA	NA	NA	NA	NA	NA	NA	NA	NA	NA	NA	NA	NA	0.0780905
AKR7A2	0.450482	0.454952	0.540208	0.524876	0.487398	0.506118	0.516137	0.396172	0.25227	0.0775131	0.0649884	0.255428	0.532076	0.366633	0.25739	0.355819	0.565743	0.627727	0.52527	0.645119	0.415544	0.290056	0.402147	0.296384	0.238177	0.164017	0.421947
AKT1	-0.12735	-0.161404	-0.100419	0.0116722	-0.244008	-0.272355	-0.0291066	-0.0876093	0.0146133	-0.0233935	-0.202196	-0.167291	0.30696	0.184265	0.234586	0.780943	0.068889	0.197324	0.00113365	0.14207	0.496171	-0.432374	0.419678	0.537721	0.291171	0.5228	0.260877
AKT2	-0.259493	-0.299253	-0.2272	-0.15982	-0.335814	-0.248891	-0.0612934	-0.166546	-0.0561877	-0.290107	-0.413977	0.0553898	0.0114308	0.0769719	0.0792815	0.112708	-0.0245367	0.142395	-0.136994	0.0652777	-0.549875	-0.803114	-0.19352	-0.0497961	-0.24266	-0.198652	0.584525
AKTIP	NA	-0.759745	NA	-0.523773	-0.68777	-0.687005	-0.369198	NA	-0.503208	NA	NA	-0.676725	NA	-0.730665	NA	0.0911959	-0.292716	-0.345907	-0.415082	-0.272718	NA	NA	NA	NA	NA	NA	0.328267
ALAD	0.289465	0.334358	0.31427	0.292987	0.157852	0.136564	0.169324	-0.0259245	-0.139689	0.174758	-0.143638	-0.0433169	NA	NA	NA	NA	NA	0.504529	NA	NA	0.0419899	0.195025	0.0296619	-0.0296018	-0.0449525	-0.16598	0.259262
ALCAM	NA	NA	NA	NA	NA	NA	NA	NA	NA	-0.487904	NA	NA	-0.531294	-0.209983	-0.301471	-0.578918	NA	NA	-0.189978	NA	NA	NA	NA	NA	NA	NA	NA
ALDH16A1	0.386568	0.402421	0.362519	0.206457	0.435104	0.366247	0.0804561	0.00132507	0.0733824	-0.0728523	0.133156	0.0836556	0.500331	0.445998	0.622362	0.736767	0.666929	0.484427	0.58425	0.578632	0.344423	0.513853	-0.17548	0.300905	0.248625	0.248845	0.922625
ALDH18A1	-0.089097	0.00200779	-0.176245	0.0637927	-0.0470205	-0.147872	0.163367	0.383967	0.436763	0.383304	0.246718	0.269662	1.08383	1.10549	1.16568	1.06261	0.593527	0.653542	0.621473	0.507112	0.501127	0.460135	0.525456	0.521208	0.590799	0.637302	0.531407
ALDH1B1	-0.124646	-0.00642497	0.0339249	-0.146528	-0.121733	-0.246247	-0.199476	-0.133303	-0.213214	-0.309031	-0.54145	-0.253325	0.538476	0.453735	0.343617	0.272455	0.12587	0.333271	0.325834	0.262442	-0.0758762	-0.0735615	-0.368668	0.0200105	-0.484228	-0.0353182	-0.117953
ALDH2	-0.707175	-0.562623	-0.819352	-0.307466	-1.08556	-0.773546	NA	NA	NA	-0.374539	NA	-1.47357	0.244469	-0.395215	-0.0612577	0.430018	-0.331093	-0.0863083	-0.152479	-0.157671	-1.04301	-0.939519	-0.538547	-1.0329	-1.39403	-1.32545	-0.844714
ALDH3A2	-0.274822	-0.0429133	-0.208776	-0.29731	-0.223377	-0.350719	-0.374387	-0.327506	-0.372913	-0.464067	-1.05504	-0.851859	0.0611984	0.205789	0.379713	0.276034	0.445435	0.389683	0.58753	0.455438	NA	NA	NA	NA	NA	NA	0.416807
ALDH5A1	0.00574621	0.0465732	0.0692235	-0.105205	0.133913	0.0403478	0.166154	0.318026	0.270115	-0.00556942	-0.0972664	0.0386831	-0.1251	-0.0671233	0.0338682	0.109521	0.680186	0.538071	0.720071	0.675622	0.384935	0.457281	0.595565	0.264548	0.18009	0.0831434	0.379349
ALDH6A1	0.399487	0.437053	0.383407	0.33468	0.327996	0.353161	0.451059	0.40062	0.0296061	0.118825	-0.143638	0.158413	0.334709	0.408625	0.223743	0.299232	0.696823	0.893131	0.695378	0.780642	0.445071	0.600182	0.506861	0.184418	0.266551	0.172899	-0.0191906
ALDH9A1	1.00038	1.03512	1.07089	1.05003	1.05084	0.978279	0.833725	0.780754	0.740108	0.47984	0.495139	0.435434	0.931185	0.909454	0.969122	0.967402	1.44357	1.79988	1.57351	1.44976	1.47751	1.40176	1.43215	1.26115	1.29734	1.12834	0.883776
ALDOA	2.55181	2.64418	2.51556	2.51907	2.59234	2.48567	2.39727	2.21875	2.25757	2.30694	2.33643	2.45403	4.32576	4.17798	4.52057	NA	2.46105	NA	NA	NA	2.59452	2.93448	2.97728	2.56442	2.63069	2.63069	1.71403
ALDOC	1.24563	1.29911	1.31463	1.11533	1.19185	1.15338	1.15357	1.03667	1.13014	1.38092	1.50992	1.42464	1.59244	1.57347	1.49594	1.17198	1.27702	1.08924	1.10218	1.39762	1.6802	2.11145	1.6878	1.44006	1.46248	1.41301	0.955878
ALG1	-0.457886	-0.88312	-0.639446	-0.739996	-0.611564	-0.641311	-0.267851	-0.76	-0.427184	-0.845732	NA	-1.03551	-0.576682	-0.472679	NA	-0.196276	-0.00768014	-0.0104431	-0.486015	0.0142903	NA	NA	NA	NA	NA	NA	-0.319279
ALG12	NA	-0.985977	NA	-0.98453	-0.638843	-0.813409	-1.09096	NA	-1.00102	NA	NA	NA	-0.212589	-0.314278	NA	-0.651863	-0.158695	-0.0749487	-0.117378	-0.148643	NA	NA	NA	NA	NA	NA	-0.727197
ALG2	-0.209757	-0.454806	-0.657376	-0.706159	-0.374533	-0.510022	-0.0961187	-0.0701429	-0.0179248	-0.765933	-0.582021	-0.39087	-0.135755	0.00513622	0.0188507	-0.316413	0.0895912	0.0074154	0.202545	0.0864626	NA	NA	NA	NA	NA	NA	0.0932546
ALG3	NA	NA	NA	-0.98453	-1.01737	-1.06801	NA	NA	NA	-0.909886	-0.701183	-1.01332	NA	NA	-1.09832	-1.0102	NA	NA	-0.888037	NA	NA	NA	NA	NA	NA	NA	NA
ALG5	-1.14107	NA	-0.750766	-0.211687	-0.588533	NA	-0.414026	-0.435538	-0.172445	NA	-0.511633	-0.819862	-0.115044	-0.09928	-0.0295257	-0.144662	-0.130068	-0.195158	-0.103117	-0.204949	-0.630284	-0.313568	-1.00475	-0.942859	-0.778647	-1.04301	-0.259482
ALG8	-0.869822	-0.6636	-0.873965	-0.912122	NA	NA	NA	-0.624922	-0.855471	NA	NA	NA	-0.566657	-0.326901	-0.0398952	-0.0345248	0.0149099	-0.162923	0.141889	0.0586805	NA	NA	NA	NA	NA	NA	0.900577
ALKBH5	-0.222989	-0.155435	-0.216426	-0.300361	-0.157977	-0.246247	-0.192942	-0.114263	-0.0465982	-0.0839679	-0.0808618	-0.184456	0.0537491	0.157988	0.183181	0.0709846	0.140961	0.296349	0.203264	0.239421	NA	NA	NA	NA	NA	NA	-0.17504
ALMS1	-1.48327	-0.776371	NA	NA	NA	NA	-0.192942	-0.229744	-0.242652	NA	NA	NA	-0.845487	NA	-0.416225	-0.306052	-0.31865	-0.473178	-0.306655	-0.36388	NA	NA	NA	NA	NA	NA	-1.13862
ALOX15	-0.430846	-0.550128	-0.408222	NA	NA	NA	NA	NA	NA	NA	NA	NA	-0.267482	-0.838048	-0.502113	-0.157917	NA	-0.727491	NA	NA	NA	NA	NA	NA	NA	NA	NA
ALOX5	-0.798878	-0.587806	-0.688869	-0.458231	-0.689557	-0.779409	NA	NA	NA	NA	NA	NA	-0.519481	-0.336209	-0.268839	-0.586952	-0.468266	-0.421293	-0.623368	NA	-0.933999	-0.384424	-0.637777	-0.863217	-1.10253	-0.745879	NA
ALOX5AP	0.861898	0.215582	0.430579	0.351878	0.26354	0.280784	0.270403	0.0715849	0.17841	-0.356717	-0.0191397	-0.222304	0.0860477	0.172317	0.0267198	0.0430863	0.515972	0.474586	0.760968	0.673252	NA	NA	NA	NA	NA	NA	2.1464
ALYREF	0.795714	0.850383	0.75362	0.695586	0.635815	0.640851	0.8768	0.719998	0.816947	0.941258	0.968417	0.891506	NA	NA	1.31922	NA	NA	NA	NA	NA	-0.973404	-0.705666	-0.520564	-0.694222	-0.779714	-0.507236	0.574418
AMDHD2	-0.300335	-0.406536	-0.301649	-0.470294	-0.314738	-0.394635	-0.82376	NA	-0.569513	NA	NA	NA	0.0220763	0.034732	-0.180287	-0.209752	-0.203342	-0.249853	-0.534221	-0.298079	-0.255511	-0.093273	-0.118316	-0.629433	-0.51657	-0.478343	-0.299746
AMOT	NA	NA	NA	NA	NA	NA	NA	NA	NA	NA	NA	NA	NA	NA	NA	NA	-0.33031	NA	NA	-0.200438	NA	NA	NA	NA	NA	NA	NA
AMPD2	0.342555	0.298875	0.31427	0.40735	0.412782	0.381139	-0.053234	0.188474	0.250387	-0.290107	-0.043031	-0.187774	0.309324	0.442585	0.457274	0.251136	0.686935	0.538071	0.422225	0.503898	0.469516	0.545769	0.489225	0.308981	0.424249	0.30858	0.336453
AMPD3	-0.0175707	-0.00103135	-0.0392784	-0.00305558	-0.0356299	-0.191073	-0.232233	-0.135287	-0.714665	-0.265169	-0.580007	-0.218596	NA	NA	NA	NA	NA	NA	NA	NA	-0.0653131	-0.334174	-0.00147681	-0.18005	-0.0877084	-0.0541892	1.22085
ANAPC1	-0.679719	-0.649522	-0.804391	-0.562778	-0.538011	NA	-0.32173	-0.68586	-0.461854	-0.803321	NA	-0.684438	-0.0340269	0.0180207	0.0985463	-0.00124982	-0.0849324	0.0499222	-0.477373	-0.0569822	NA	NA	NA	NA	NA	NA	-0.45067
ANAPC15	NA	NA	NA	NA	NA	NA	-1.38954	NA	-1.36578	-1.24125	-1.31978	-1.35057	NA	NA	NA	NA	NA	NA	NA	NA	NA	NA	NA	NA	NA	NA	NA
ANAPC16	NA	NA	NA	NA	NA	NA	NA	NA	NA	NA	-0.677862	NA	NA	-1.06876	-0.98964	NA	-0.635126	-0.589444	-0.649765	-0.634297	NA	NA	NA	NA	NA	NA	-0.567073
ANAPC4	-1.04971	-0.988217	NA	NA	NA	NA	-1.0436	-1.19123	-1.14245	NA	NA	NA	-0.156515	-0.148663	0.0297937	-0.126062	-0.620682	-0.24628	-0.157774	-0.298682	NA	NA	NA	NA	NA	NA	-0.960996
ANAPC5	-0.697	-0.978289	-0.462959	-0.599266	-1.02605	NA	-0.461553	-1.15899	NA	-0.420192	-0.550294	-0.493073	-0.267382	-0.222906	-0.249217	-0.225413	-0.243561	-0.28106	-0.268516	-0.226728	NA	NA	NA	NA	NA	NA	-0.534525
ANAPC7	-0.473105	-0.59754	-0.435164	-0.747421	-0.841591	-0.737774	-0.0585159	-0.592575	-0.10612	-0.389409	0.476799	-0.157423	0.419905	0.364901	0.363807	0.275391	0.131969	-0.00674311	-0.132994	-0.143051	NA	NA	NA	NA	NA	NA	0.00865869
ANGEL2	-0.9463	NA	-0.892303	-0.795092	NA	-0.74229	NA	NA	NA	NA	NA	NA	NA	NA	-0.662922	-0.452386	-0.140867	-0.227391	-0.299854	-0.189083	NA	NA	NA	NA	NA	NA	-0.715305
ANK3	0.102166	0.534566	-0.00643583	0.0398828	-0.0262659	0.0304623	-0.0870081	0.111646	0.0200816	0.191715	-0.0579853	0.0680261	-0.874478	-0.864482	-0.324917	-0.313306	0.34731	0.497883	0.383659	0.333588	0.140802	0.456131	0.324051	-0.0401381	0.146834	0.145326	0.263951
ANKFY1	0.465668	0.437053	0.444073	0.0848123	0.306455	0.40198	0.147181	0.163232	0.221007	-0.344829	0.0382544	-0.142798	0.118052	0.104625	0.60012	0.273056	0.626373	0.652867	0.580577	0.625419	0.299524	0.440607	0.21265	-0.0131065	0.109802	0.0807198	-0.0944927
ANKHD1	-0.834171	-0.56754	-0.562059	-1.25933	-0.68593	-0.963727	-0.100678	-0.388299	-0.132029	-0.0609802	-0.178068	-0.0700657	NA	NA	NA	NA	NA	NA	NA	NA	-0.422632	-0.252788	-0.118575	-0.369439	0.0608895	0.0679068	-0.336018
ANKLE2	1.00448	NA	-0.103141	1.35291	1.78227	1.30592	1.14964	1.09432	0.644433	0.962772	1.00943	0.929947	0.0346347	0.0806589	0.844859	-0.0811124	-0.356722	0.449143	-0.354626	-0.289728	-0.688825	-0.397826	-0.73457	-0.19755	-0.10109	-0.279371	-0.489018
ANKRD11	-1.24402	NA	-1.18016	NA	-0.0506917	NA	-0.883561	NA	NA	NA	NA	NA	-1.00244	-0.871592	-1.09034	-0.934728	-0.858089	-0.0685417	-0.555252	-1.09352	NA	NA	NA	NA	NA	NA	-1.4086
ANKRD13A	0.119007	0.0545043	0.141213	-0.205066	-0.0612815	-0.046179	-0.287431	-0.249902	-0.273733	-0.307598	-0.171284	-0.238133	0.0964054	-0.0770785	0.0493051	-0.0713316	0.21607	0.29127	0.327844	0.302964	0.188246	0.262593	0.0997043	-0.0679336	0.0443213	-0.026281	-0.51905
ANKRD17	NA	NA	NA	NA	NA	NA	-1.20926	NA	-1.00271	-0.891903	-0.674016	-0.978754	-0.0788635	0.223945	-0.0177935	-0.199937	-0.52826	-0.552213	-0.491918	-0.571885	-0.798713	-0.720352	-0.684802	-1.06916	-0.716409	-1.12825	-0.527042
ANKRD27	NA	-1.07131	NA	-1.33738	-0.777476	NA	-1.32167	-1.10209	-0.999198	-0.629734	-0.357063	NA	-0.469424	-0.705179	-1.32308	-0.544418	-0.49615	-0.358574	-0.883695	-0.903904	NA	NA	NA	NA	NA	NA	-1.32133
ANKRD28	NA	-0.444612	NA	-1.08525	-0.91913	-0.947195	-0.790638	-0.975749	-0.686771	-0.712898	NA	-0.666915	-0.0427195	-0.0904387	-0.0682527	-0.363842	-0.252033	-0.272627	-0.435451	-0.484771	-0.679856	-0.718939	-0.646913	-0.744968	-0.723438	-1.01118	-0.366154
ANKRD44	0.757301	0.769144	0.74245	0.804809	0.626359	0.644076	0.655676	0.566997	0.596574	0.442117	0.272891	0.364329	1.01886	0.850235	0.948182	1.02387	1.04292	1.00314	0.934859	1.13832	0.961115	1.10465	1.12834	0.780559	0.833155	0.770551	0.612845
ANKS1A	-0.697	-0.586381	NA	-1.19207	-0.850337	-0.837335	NA	NA	NA	NA	-1.17518	NA	-1.05384	-0.834315	-0.819701	-0.589086	-0.406619	-0.960728	-0.524895	-0.527099	NA	NA	NA	NA	NA	NA	-0.327981
ANKZF1	NA	NA	NA	-0.948875	NA	NA	NA	NA	-1.09589	-1.04997	-0.886811	-0.645392	0.374973	0.443457	0.423423	0.0885199	-0.0493987	-0.0834893	-0.13116	-0.0807663	NA	NA	NA	NA	NA	NA	-0.586238
ANO6	NA	NA	-0.949922	-0.219719	-0.807786	-0.663263	-0.90463	-0.881634	NA	NA	NA	NA	-0.740131	-0.329726	-0.234465	-0.390437	0.19938	0.0643951	0.166145	0.0168107	NA	NA	NA	NA	NA	NA	0.119527
ANP32A	1.42543	1.40692	1.44116	0.991804	1.30742	1.15924	0.982273	1.12446	0.872128	1.10331	1.17879	1.32669	1.66602	1.48727	1.3561	1.45609	1.77732	1.59299	1.77936	1.79569	0.339032	0.380679	0.899273	0.428094	1.13831	0.896293	1.17292
ANP32B	0.969958	0.912295	0.942736	0.449474	0.474223	0.433948	0.570856	0.599635	0.549085	1.62732	1.11592	0.854947	1.17876	0.716585	1.2053	1.11013	0.819961	0.964956	1.05782	1.08643	-0.290294	-0.362767	0.0810861	0.0497682	0.544699	0.347105	0.995853
ANP32E	1.06336	1.0294	1.04345	0.468507	0.501547	0.449035	0.453865	0.497593	0.569636	1.06289	1.02277	1.1489	NA	NA	NA	NA	NA	0.990367	NA	NA	-0.00712842	-0.289154	0.305761	0.13021	0.553784	0.470584	1.80457
ANXA1	3.2789	3.09129	3.44985	2.89133	2.88126	2.67466	2.82874	2.80734	2.65549	2.39414	2.06801	2.31616	1.43597	1.17523	1.08765	1.34416	3.03257	2.59008	2.24168	2.74473	2.81873	3.2565	3.17507	2.52473	2.59452	2.97728	1.52884
ANXA11	1.28201	1.3421	1.33611	1.3155	1.27207	1.36751	0.949296	1.05476	1.09554	0.993089	0.958047	0.881665	1.06198	1.1253	1.26773	1.0501	1.45725	1.45519	1.31568	1.50883	1.555	1.79522	1.56423	1.43638	1.37534	1.37087	0.744358
ANXA2	2.32789	2.48312	2.45352	2.44597	2.21277	2.10867	1.95129	2.31813	2.13226	2.08406	1.84198	1.9796	1.72951	1.71616	1.81541	1.75322	1.03818	0.926602	0.928582	0.646722	2.32098	2.3416	2.30043	2.27827	1.93156	2.13679	1.09025
ANXA3	-0.616393	-0.658925	-0.379461	-0.453109	-0.747546	-0.544569	-0.3644	-0.437543	-0.397525	-0.408352	-0.534594	-0.548463	-0.618407	-0.337707	-0.339815	-0.488283	0.731556	0.2606	0.754187	-0.321297	-0.888825	-0.295129	-0.707201	-0.988052	-0.889341	-1.31878	-0.316675
ANXA4	0.415215	0.412746	0.369268	0.200581	0.334587	0.317674	0.284052	0.3579	0.411358	0.205526	0.0783618	0.175982	0.311847	0.384861	0.298451	0.317967	-0.112457	0.104819	-0.205773	-0.0448154	0.700036	0.701037	0.711146	0.44748	0.558272	0.525914	0.259135
ANXA5	1.66552	1.61434	1.64083	1.23917	1.24333	1.20917	1.28462	1.20226	1.30512	1.08752	1.12259	1.09513	1.02388	1.09561	1.09537	1.04621	1.08971	1.29083	0.966052	1.07969	1.66491	1.30063	1.4481	1.32013	1.16938	1.37961	NA
ANXA6	4.42474	4.43828	4.40903	5.0726	3.66078	3.76759	3.3661	3.0813	3.25741	3.5375	3.22293	3.25022	3.22491	2.8899	3.04518	3.19314	6.23686	6.44436	4.56395	6.46471	3.17507	3.03323	3.2565	2.87235	2.93448	2.87235	2.2347
ANXA7	1.1668	1.19578	1.10243	0.930982	1.1645	1.0768	0.805903	0.830982	0.807638	0.848913	1.02838	0.936618	0.845775	1.0296	1.02655	1.1026	0.847623	0.985094	0.874748	1.06612	1.25263	1.03613	0.99835	1.41301	1.05265	1.08839	0.377441
AP1B1	0.144763	-0.0298391	0.0832431	0.113049	0.0600793	-0.0151841	-0.289143	-0.402525	0.229148	0.176387	-0.285693	-0.154288	1.2511	1.23523	1.30742	1.05629	1.06542	1.12884	0.997083	1.04683	0.200469	0.223237	0.611415	0.482679	0.384229	0.520406	1.00247
AP1G1	0.253492	0.39237	0.31427	0.353581	0.26354	0.280784	0.158167	0.403417	0.401295	0.379032	0.292772	0.377811	0.583935	0.648809	0.747434	0.566234	0.706228	0.716899	0.640212	0.71907	-0.29919	-0.19755	-0.139651	-0.248881	-0.0914961	-0.127501	0.136976
AP1G2	-0.0790477	-0.0891796	-0.169058	-0.179368	-0.617844	-0.561728	-0.14632	-0.305898	0.0446633	-0.142973	-0.328587	-0.193636	0.423169	0.306254	0.456911	0.272706	0.0996136	0.505469	0.0601781	0.169229	-0.574904	-0.569516	-0.933999	-0.633692	-0.583062	-0.627459	-0.664956
AP1M1	0.327203	0.419665	0.449845	0.430583	0.363687	0.415686	0.424662	0.336521	0.3818	0.20033	0.172556	0.161854	0.610714	0.662796	0.669597	0.635765	0.692757	0.514568	0.64821	0.504478	-0.205683	-0.269102	-0.21146	-0.0304264	-0.32441	-0.0970162	1.22742
AP1S1	NA	NA	NA	-0.941216	-0.694574	NA	NA	-0.878744	-0.813267	-0.803321	-0.679793	-0.725562	-0.000508462	0.16927	0.165585	-0.0957036	-0.167524	-0.0786986	-0.305751	-0.15073	NA	NA	NA	NA	NA	NA	-0.447836
AP1S2	-0.419919	-0.242194	-0.110874	-0.0503505	-0.0356299	-0.111853	-0.576451	-0.428955	-0.479982	-0.301642	-0.0388284	-0.385376	-0.0201227	-0.00350779	0.0384172	-0.413294	0.0143464	0.172642	0.111669	0.119162	-0.0974372	-0.622361	-0.351116	-0.145042	-0.113751	-0.112327	-0.246856
AP2A1	0.510181	0.427816	0.538003	0.453192	0.349041	0.397805	0.530736	0.515583	0.433607	0.516891	0.344442	0.30135	0.987087	1.09327	1.14441	0.877154	0.897041	0.886578	0.843768	0.881479	0.0650916	-0.499014	0.177978	0.0468542	-0.00807215	-0.0401381	0.152548
AP2A2	0.371936	0.247265	0.221347	0.220387	0.267865	0.0902246	0.335723	-0.0810777	0.206278	0.571	0.37794	0.438589	NA	0.504435	0.500472	NA	NA	NA	NA	NA	-0.702956	-0.707201	-0.475236	-0.326231	-0.270879	-0.86176	0.584241
AP2B1	0.697708	0.731147	0.702738	0.515239	0.672315	0.562565	0.797458	0.577797	0.604477	0.680074	0.640777	0.66519	NA	0.829001	NA	NA	NA	NA	NA	NA	0.654248	0.19706	0.840162	0.796304	0.554612	0.837141	0.335779
AP2M1	0.348623	0.357127	0.291804	0.581033	0.465568	0.350694	0.276212	0.20123	0.358424	0.13447	0.21118	-0.0519909	0.523637	0.696044	0.645077	0.59526	0.662386	0.683076	0.543863	0.670246	0.29545	0.44748	0.0758075	0.195025	0.206086	0.1765	0.916686
AP2S1	-0.222989	-0.153845	0.0189104	-0.104153	0.0446329	0.176585	-0.130096	-0.364091	-0.445006	-0.367682	-0.242367	-0.216569	0.135236	0.235262	0.335621	-0.0458458	0.235619	0.0221696	0.119357	-0.086214	NA	NA	NA	NA	NA	NA	0.517023
AP3B1	0.0851486	0.146918	0.127792	0.0689523	0.0146085	-0.0912939	-0.0802351	-0.091534	0.0109789	0.0144256	-0.00986063	0.158413	0.656732	0.716135	0.736238	0.549838	0.652342	0.714713	0.669954	0.676835	-0.520923	-0.157287	-0.413824	-0.70353	-0.129513	-0.485447	0.170998
AP3D1	0.286334	0.261742	0.273388	0.203398	0.0600793	0.0435935	0.457696	0.4824	0.563855	0.328566	0.236431	0.514556	0.500331	0.517297	0.639466	0.583915	0.612815	0.622209	0.446599	0.585261	-0.721718	-0.639575	-0.869863	-0.918986	-0.623551	-1.01806	-0.070675
AP3M1	-0.0765808	-0.0262945	0.0103828	-0.236032	-0.285395	-0.399535	-0.053234	0.160744	0.0397791	0.0935751	0.0737323	-0.0261507	0.355397	0.369848	0.38058	0.274289	0.230825	0.15634	0.271573	0.284565	-0.576234	-0.81101	-0.422632	-0.682816	-0.871342	-1.0895	-0.199917
AP3S1	-0.202152	-0.206373	-0.146162	-0.253024	-0.223377	-0.122487	-0.520584	-0.422759	-0.400862	-0.578587	-0.532666	-0.284854	0.253883	0.187984	0.190092	0.0200655	0.580168	0.0713956	-0.254697	0.512551	-0.726985	-0.737655	-0.882958	-0.977269	-0.738237	-0.943664	-0.15628
AP4S1	-0.612944	-0.684128	-0.844427	-0.811862	-0.996251	NA	-1.07673	NA	NA	-0.803321	NA	NA	-1.40289	NA	NA	-0.796791	-0.41904	-0.374983	-0.312253	-0.316432	NA	NA	NA	NA	NA	NA	-0.461922
AP5B1	-1.09068	-1.1713	-0.973736	NA	NA	NA	NA	NA	NA	NA	NA	NA	-0.611352	-1.0237	-0.547353	NA	-0.880972	-0.754026	-0.501072	-0.446708	NA	NA	NA	NA	NA	NA	-0.641451
AP5S1	NA	NA	NA	NA	NA	NA	-0.800664	-0.842097	NA	NA	NA	NA	NA	NA	NA	-0.950503	-0.942422	-0.686983	-0.695338	-0.889287	NA	NA	NA	NA	NA	NA	NA
AP5Z1	NA	-0.622803	NA	-1.481	NA	NA	-0.644216	-0.675098	-0.297624	NA	NA	-0.827369	-0.419459	-0.321626	-0.293201	-0.275671	-0.374599	-0.269751	-0.334284	-0.264798	NA	NA	NA	NA	NA	NA	-0.3242
APAF1	-0.352702	-0.303314	-0.462959	-0.659509	-0.541171	-0.878749	NA	-0.168386	NA	NA	-1.11488	NA	-0.217026	-0.147017	-0.0552066	-0.576651	0.118016	-0.0569639	-0.195076	-0.0661139	-0.44211	-0.291739	-0.230028	-0.679856	-0.441848	-0.902915	-0.540665
APBB1	-0.419919	-0.483365	-0.757916	-0.760704	-0.752788	-1.14265	NA	NA	-0.779364	-0.684553	NA	NA	-0.440432	-0.422665	-0.116384	-0.403115	-0.0872955	0.0162265	-0.0693745	-0.0259738	NA	NA	NA	NA	NA	NA	0.237573
APBB1IP	0.553835	0.474694	0.546376	0.493279	0.644143	0.607384	0.478843	0.363756	0.371179	0.176387	-0.0257126	0.227332	0.528396	0.438693	0.516129	0.549416	0.701816	0.679297	0.607569	0.708098	0.575405	0.743323	0.781799	0.629907	0.613576	0.599197	-0.0237044
APEH	0.399487	0.484995	0.496741	0.538266	0.371024	0.392684	0.276212	0.354494	0.387709	0.318902	0.383022	0.415578	0.922028	0.79405	0.780986	0.7974	0.642397	0.611521	0.496997	0.740666	0.765327	0.872277	0.608283	0.628187	0.604699	0.653822	0.409107
APEX1	1.60745	1.63385	1.65324	1.30777	1.62467	1.50531	1.57733	1.24456	1.60432	1.86989	1.20918	1.87909	0.96096	0.972714	1.13472	1.31442	2.15875	2.10561	2.35243	2.15161	1.24931	1.6981	1.45252	1.11762	1.24505	1.06793	1.29529
API5	1.05774	0.661523	0.98035	0.618801	0.614669	0.593855	0.561902	0.559905	0.572289	0.602	0.348475	0.538223	NA	1.29082	NA	1.00199	NA	NA	NA	NA	0.300905	0.383648	-0.12003	0.456131	0.213513	0.227117	1.55714
APIP	-0.219627	-0.217175	-0.211539	0.276471	0.0984142	0.0483972	-0.313549	-0.42718	-0.246828	-0.493993	-0.336848	-0.464055	0.413297	0.224535	0.226307	-0.0470116	0.278981	0.304519	0.0451715	0.126463	0.0402337	0.218283	-0.501351	-0.156385	-0.0578552	-0.0111965	0.00110068
APMAP	0.757301	0.67485	0.685908	0.595842	0.8111	0.659234	0.683658	0.764798	0.719218	0.32151	0.407058	0.446319	0.438395	0.541676	0.635875	0.557827	1.07359	1.17862	1.23159	1.18357	0.812912	0.972843	0.669921	0.711146	0.729056	0.690565	0.510223
APOA1	NA	NA	NA	NA	NA	NA	NA	NA	-0.7939	0.33194	0.481967	0.356629	2.93658	1.36053	0.961002	1.75322	0.753163	0.597232	4.80055	4.74605	NA	NA	NA	NA	NA	NA	1.35353
APOA2	NA	NA	NA	NA	NA	NA	NA	NA	NA	-0.299001	-0.342329	-0.329704	1.29326	0.966652	0.939906	1.27101	0.0390668	-0.518316	2.0157	2.18965	NA	NA	NA	NA	NA	NA	0.461166
APOA4	NA	NA	NA	NA	NA	NA	NA	NA	NA	-0.523213	-0.302835	-0.334295	0.904998	0.265468	0.118342	0.859271	-0.0130473	-0.290342	1.49479	1.20388	NA	NA	NA	NA	NA	NA	1.53686
APOB	NA	NA	NA	-0.516715	NA	NA	0.231789	0.0431643	0.196284	0.236571	0.336244	0.23801	1.55245	1.23897	0.650204	1.8316	0.715338	0.563333	1.92569	1.66742	-0.333075	-0.831305	-0.443775	0.0671491	-0.0512804	-0.0139913	0.621532
APOBEC3C	-0.277364	-0.286848	-0.240313	0.0522582	-0.307313	-0.346502	0.0115673	-0.236913	-0.244987	-0.14786	-0.180215	-0.175262	0.133445	0.258409	0.359505	0.3049	-0.304299	-0.144853	-0.27427	-0.174239	NA	NA	NA	NA	NA	NA	0.0443074
APOBEC3D	-0.725584	NA	-0.714357	-0.413937	-0.999948	-1.0815	NA	NA	-0.845333	NA	NA	NA	-0.19443	-0.147897	-0.0558597	-0.396756	-0.614093	-0.684142	-0.671196	NA	NA	NA	NA	NA	NA	NA	-0.386314
APOBEC3G	-0.169369	-0.186691	-0.349333	-0.335864	-0.395286	-0.122487	-0.180766	-0.466293	-0.513706	-0.597527	-0.330266	-0.369774	0.18021	0.394748	0.340204	0.249347	-0.0980215	0.423327	-0.143337	0.493195	NA	NA	NA	NA	NA	NA	-0.360928
APOBR	-0.424656	-0.19096	-0.360124	0.00103895	-0.360643	-0.582104	-0.437455	-0.659858	-1.08753	-0.999577	NA	NA	0.111064	-0.505379	-0.18774	0.00210472	0.157753	-0.277604	-0.169012	-0.194516	0.462092	0.0257217	0.39177	0.0271844	0.11439	0.200913	-0.629053
APOC3	NA	NA	NA	NA	NA	NA	NA	NA	NA	-0.206542	-0.192885	-0.196522	1.25551	0.813901	0.769867	1.12041	0.0691715	0.353716	1.62775	1.52087	NA	NA	NA	NA	NA	NA	1.55102
APOD	NA	NA	NA	NA	-1.3433	NA	-0.374387	-0.479802	-0.776145	-0.228847	0.0952579	0.0386831	0.625656	0.463604	0.48537	0.788932	-0.602915	NA	0.895383	0.915487	-0.823849	-0.8559	-1.18441	-0.845447	-0.783121	-0.916937	0.105585
APOE	NA	NA	NA	NA	NA	NA	-0.790638	NA	NA	-0.508083	-1.01815	-0.594183	0.664941	0.374369	0.0811084	0.848154	-0.0890014	-0.175835	1.10336	0.955472	NA	NA	NA	NA	NA	NA	0.193409
APOL2	-0.964527	-0.462776	-0.647357	-0.682125	-0.456184	-0.479854	0.0659439	0.00633906	0.104937	0.0300199	0.117761	0.0589792	0.253507	0.242618	0.418329	0.464487	-0.319369	-0.114139	-0.141591	-0.345579	-0.0762724	0.0833266	0.131977	0.327422	0.30401	0.51327	-0.390686
APOL3	-0.089097	-0.127693	-0.25759	-0.616117	-0.420051	-0.803886	0.0115673	0.279232	0.0942771	-0.480596	-0.267356	-0.454888	-0.167648	-0.151538	-0.0198792	0.0887442	-0.0647793	0.093923	-0.0990259	-0.00615947	-0.993933	-0.185065	-0.745879	-0.766653	-0.460082	-0.60055	-0.372251
APOO	-0.473105	-0.444612	-0.178301	-0.518695	-0.47292	-0.326905	-0.576451	-1.04411	-0.884762	-0.537393	-0.592778	NA	-0.819976	-0.817409	-0.859278	-0.588018	-0.149399	-0.122339	-0.0909494	-0.0991785	-0.240369	-0.535721	-0.0649295	-0.227733	-0.236203	-0.373805	-0.381181
APOOL	0.137108	0.0913639	0.147647	0.167085	-0.0373318	-0.0280443	0.0115673	-0.116444	-0.0608849	-0.361988	-0.584045	-0.273422	-0.141559	0.0293654	-0.151817	-0.14419	0.383698	0.291971	0.304339	0.330131	-0.195163	0.0668132	0.0557377	-0.948235	-0.258949	-0.447254	0.0296821
APPL1	0.172741	0.255906	0.0803796	0.33468	0.0669605	-0.114836	-0.043256	0.20123	0.0296061	-0.0367852	-0.371849	-0.171999	0.321338	0.168316	0.221685	0.276807	0.382734	0.350035	0.324336	0.434776	0.410927	0.605976	0.718996	0.198596	0.349157	0.166077	-0.138579
APRT	0.977856	1.0461	1.00899	0.807646	0.95818	1.22479	1.06181	1.04639	0.931845	0.964992	1.15759	1.03293	1.25867	1.20177	1.19498	0.920847	1.64516	1.75441	1.27882	1.70345	1.08346	1.03813	1.02222	1.0466	0.941392	0.924886	2.44595
AQR	-0.0597677	-0.00894756	0.0318428	0.0257506	-0.0656859	-0.132091	0.0455377	-0.16278	0.0768082	0.223597	0.0321337	0.298547	0.554755	0.584923	0.545898	0.674735	0.692076	0.822191	0.610854	0.668577	NA	NA	NA	NA	NA	NA	0.147012
ARAF	-0.562954	-0.543365	-0.539599	-0.271042	-0.278002	-0.912141	-1.0436	-0.599914	-0.611863	-0.704279	-0.999293	-0.684438	-0.196684	0.04729	-0.0133464	-0.0088833	0.197676	0.166165	0.0427825	0.179402	0.12138	0.109075	-0.0285803	-0.0379464	0.0253726	-0.0195399	-0.344877
ARAP1	-0.199571	0.0603209	-0.270876	-0.0610959	-0.264782	-0.362182	-0.41159	-0.327506	-0.461854	-0.0388168	-0.438078	0.011296	0.214489	0.256587	0.320509	0.182664	0.277865	0.169045	0.119102	0.236674	0.00142399	-0.16353	-0.333645	-0.146129	-0.218968	-0.606834	0.307492
ARCN1	0.734245	0.76053	0.733129	0.781005	0.785103	0.755727	0.848737	0.878983	0.844895	0.830234	0.7609	0.749148	0.898806	0.872323	1.02773	0.965171	0.800255	0.820319	0.781143	0.919993	0.67613	0.868656	0.775498	0.793621	0.855818	0.746533	0.662202
ARF1	0.757301	0.67485	0.614585	0.705254	0.489505	0.462337	1.01893	0.959073	0.910941	0.634129	0.635974	0.653155	1.38366	1.34344	1.34639	1.08849	1.59713	1.53225	1.29055	1.52087	-0.408705	-0.484644	-0.242272	-0.181976	-0.50289	-0.370963	1.28493
ARF4	-0.558721	-0.69889	NA	-0.602071	-0.214149	NA	-0.712387	-0.586904	-0.527714	-0.302959	0.0399909	-0.081731	0.482101	0.593794	0.53179	0.328446	0.195302	0.228566	0.355515	0.229211	NA	NA	NA	NA	NA	NA	0.998516
ARF5	0.565367	0.579822	0.506683	0.81697	0.520758	0.533159	0.758755	0.754754	0.844895	0.65659	0.585029	0.583409	-0.117632	-0.0990051	-0.0711621	0.0881691	0.465291	0.223151	0.758032	0.589487	NA	NA	NA	NA	NA	NA	1.0014
ARF6	0.312008	0.161322	0.28661	0.280365	0.184178	0.0773141	0.312208	0.379142	0.328537	0.281366	0.111953	0.180712	0.408134	0.514024	0.358135	0.352546	0.24028	0.267884	0.114175	0.216354	-0.732131	-0.881586	-0.619685	-1.03889	-1.18018	-0.577541	0.94632
ARFGAP1	-0.430846	-0.303314	-0.350829	-0.261333	-0.305068	-0.423225	NA	-0.520696	-0.319404	-0.471638	-0.326832	-0.461885	0.0711456	-0.00516793	-0.11153	0.00714434	-0.0864621	-0.0935405	-0.133383	-0.093138	-0.0707471	-0.455607	-0.093273	-0.0443883	0.0928019	0.087474	0.045188
ARFGAP2	-0.156026	-0.163389	-0.181569	-0.0418708	-0.0506917	-0.0175564	-0.0899552	0.140687	0.12704	-0.0492669	-0.0114008	-0.142798	NA	NA	NA	NA	NA	NA	NA	NA	0.166077	0.216995	0.259624	0.328073	0.29545	0.21265	0.246768
ARFGAP3	-0.454481	-0.387965	-0.727037	-0.130286	-0.531099	-0.716974	-0.104466	-0.149534	-0.626598	-0.835577	-0.929684	NA	0.00103321	0.0404378	0.0952933	-0.249961	-0.259226	-0.343552	-0.259453	-0.247588	0.153861	0.289403	0.241464	0.03132	0.101553	0.174144	-0.626185
ARFGEF1	-0.230433	0.0648042	-0.143184	-0.171316	-0.100427	-0.231743	-0.549343	-0.628778	-0.167705	-0.137736	-0.110649	-0.225329	0.284495	0.482113	0.465697	0.270188	0.434029	0.432117	0.238244	0.401011	-1.18018	-0.717802	-0.343127	-0.497004	-0.793398	-0.806087	0.0395751
ARFGEF2	-0.465506	-0.534343	-0.312888	-1.14705	-0.292439	-0.510022	-0.641081	-1.00769	-0.950407	NA	-0.505339	NA	-0.217719	-0.0570929	-0.00967598	-0.0229365	0.200313	0.16298	0.127087	0.0851477	-0.56188	-0.808198	-0.779714	-0.720631	-0.784682	-0.60478	-0.0527231
ARFIP1	-0.457886	-0.289678	-0.489878	-0.873875	-0.675556	NA	-0.563991	NA	-0.743671	-0.228847	-0.165089	-0.130343	NA	0.0246602	-0.0543717	-0.13054	NA	NA	NA	NA	-0.281264	-0.465837	0.175084	-0.164871	-0.0890474	-0.0739588	-0.417551
ARFIP2	-0.841087	-0.868306	-0.820582	-0.924142	-1.49757	NA	NA	NA	-0.960239	-0.787175	-0.997267	-0.659031	-0.149763	-0.24919	-0.332194	-0.393452	-0.448433	-0.582307	-0.834106	-0.730199	-0.483229	-0.426098	-1.196	-0.582572	-0.509525	-0.450655	-0.628
ARFRP1	NA	NA	-1.37751	NA	NA	NA	-0.887402	-1.16766	-0.85242	-1.57419	NA	-1.2492	-0.265395	-0.398284	-0.292775	-0.461841	-0.768287	-0.73492	-0.551154	-0.469527	NA	NA	NA	NA	NA	NA	-0.817662
ARGLU1	0.119007	0.0625239	0.125173	0.223801	0.132047	0.104826	-0.183071	-0.166546	-0.167705	-0.14102	-0.363985	-0.035526	-0.898929	NA	0.100778	-0.308579	0.0190649	-0.0114636	-0.103457	0.0174777	NA	NA	NA	NA	NA	NA	-0.19338
ARHGAP1	0.543794	0.569522	0.562984	0.567732	0.457409	0.522288	0.504546	0.450194	0.506388	0.504168	0.529428	0.460718	0.719387	0.670379	0.703692	0.581227	0.781075	0.792775	0.837488	0.796509	0.455249	0.201979	-0.327408	0.373056	0.320072	0.357012	0.840337
ARHGAP15	-0.184824	-0.275336	-0.273437	-0.271042	-0.206238	-0.408107	-0.188405	-0.355562	-0.339362	-0.302959	-0.377023	-0.10069	0.410476	0.448997	0.506407	0.526843	0.683394	0.635769	0.542169	0.655228	0.315949	0.543082	0.434835	0.0556479	0.224207	0.0899372	0.319602
ARHGAP17	0.184664	0.185815	0.116778	0.123149	-0.01634	-0.151116	0.0702343	0.316304	-0.0386637	-0.401879	-0.390575	-0.432885	NA	NA	NA	NA	NA	0.562986	0.479024	NA	0.282456	0.276565	0.206461	0.140802	0.0631016	0.160034	-0.239228
ARHGAP25	0.926558	0.918292	0.913003	0.873917	0.706918	0.652603	0.710523	0.664617	0.653044	0.478661	0.43728	0.538223	NA	NA	0.587892	NA	0.906134	0.927269	0.836674	NA	1.20086	1.24505	1.17734	0.965964	0.990692	1.02222	1.26645
ARHGAP27	-0.527499	-0.427233	-0.458968	-0.105205	-0.793179	-0.614091	-0.563991	-0.682406	-0.454484	-1.23617	NA	NA	NA	NA	NA	0.233034	0.19349	0.0434655	0.192554	0.258551	-0.206507	-0.0606044	-0.477574	-0.53426	-0.377078	-0.735735	0.291372
ARHGAP30	0.417561	0.451795	0.48317	0.323323	0.400481	0.41208	0.00975471	0.0745861	0.00155397	-0.183742	-0.0956535	-0.142798	0.379063	0.351709	0.344506	0.602137	0.517054	0.610816	0.57114	0.591902	0.402147	0.248845	0.366302	0.133011	0.428094	0.449886	-0.112097
ARHGAP31	-0.769528	-1.18987	-0.943585	-0.637795	-0.385167	-0.346502	-0.454667	-0.512799	-0.389809	-0.48361	-0.416774	-0.562952	0.0836424	0.00581294	0.18159	NA	-0.212183	-0.244245	-0.305838	-0.232107	NA	NA	NA	NA	NA	NA	NA
ARHGAP4	0.697708	0.63694	0.706537	0.63327	0.647409	0.572381	0.409639	0.42179	0.496671	0.349737	0.182272	0.364329	0.493182	0.633824	0.652979	0.580704	1.02285	0.979015	0.806603	0.977816	0.73597	0.967054	0.81109	0.493081	0.622255	0.563025	0.60151
ARHGAP45	1.11703	1.11455	1.0927	1.04297	0.912239	0.920643	0.532723	0.497593	0.549085	0.492819	0.559612	0.629772	0.69075	0.709008	0.829439	1.05211	1.59713	1.48774	1.45764	1.47516	1.10658	1.21531	1.26115	1.02994	1.05469	0.971133	0.798508
ARHGAP5	-0.638757	-0.75616	NA	-0.60771	-1.00277	NA	NA	NA	NA	NA	NA	NA	-0.636115	-0.514605	-0.440408	-0.817862	-0.409444	-0.226707	-0.63957	-0.581123	NA	NA	NA	NA	NA	NA	-0.751968
ARHGAP9	0.269615	0.39479	0.380169	0.143755	0.248584	0.302164	0.129547	-0.0484042	0.304026	-0.0075755	-1.15593	-0.0261507	0.417153	0.420248	0.38877	0.417334	0.673618	0.600592	0.712089	0.715976	0.0890451	0.258263	0.0298451	-0.2838	-0.106159	-0.298105	0.122855
ARHGDIA	1.89748	1.84585	1.79372	2.11967	1.57966	1.70913	1.41712	1.38086	1.39294	1.16488	1.12259	1.21505	1.33314	1.05512	1.15407	1.01888	1.20257	1.00016	0.877355	1.01335	2.11145	1.37961	1.4684	1.92174	1.95947	1.72508	2.48309
ARHGDIB	3.11097	3.09129	3.07282	4.2965	3.37964	3.57736	2.75607	3.21234	2.85165	2.12509	2.06801	2.21388	NA	NA	NA	NA	NA	NA	2.78231	NA	2.68149	2.37065	2.68149	2.41733	2.46876	2.44715	2.54521
ARHGEF11	-0.343604	-0.247213	-0.219573	0.265312	0.206874	0.0535992	-0.171549	-0.0680104	-0.287515	-0.848744	-0.912143	-0.967444	NA	NA	NA	NA	-0.823352	-0.611432	-0.956346	-0.959386	NA	NA	NA	NA	NA	NA	-1.05058
ARHGEF18	0.465668	0.39763	0.45646	0.355491	0.236596	0.212888	0.129547	0.0942436	-0.0580499	0.00788317	-0.214822	0.129159	NA	NA	NA	0.304656	0.823304	0.878672	NA	NA	0.548175	0.599197	0.67195	0.381378	0.400628	0.324051	0.286447
ARHGEF2	0.304127	0.304141	0.28182	0.32616	0.253521	0.184058	0.520853	0.298324	0.393345	0.473825	0.486933	0.512223	NA	NA	0.789558	0.725186	NA	0.647725	NA	NA	0.11439	0.283672	0.351386	0.213513	0.327422	0.224783	0.117509
ARHGEF6	0.46269	0.430575	0.480015	0.571957	0.440063	0.372266	0.409639	0.405802	0.414391	0.246861	0.286484	0.0710109	NA	NA	NA	NA	NA	NA	NA	NA	0.74847	0.8444	0.669921	0.519651	0.5803	0.570207	0.345837
ARHGEF7	0.165953	0.170835	0.0933519	-0.0300122	0.0189156	0.00109058	0.0702343	0.0942436	0.173096	-0.263471	-0.0850104	-0.364293	0.234998	NA	0.326458	NA	NA	0.376936	NA	0.270538	0.333031	-0.023284	0.139273	0.0717945	0.152026	0.211964	0.839031
ARID1A	0.0422816	0.129835	0.0692235	-0.0662104	0.00355807	-0.0586632	-0.104466	0.0517246	0.0492376	-0.127618	0.0278008	-0.0963305	0.526311	0.560157	0.642615	0.545552	0.664916	0.631326	0.543393	0.624891	NA	NA	NA	NA	NA	NA	0.166536
ARID1B	-0.215199	-0.249138	-0.433102	-0.434933	-0.850337	-0.782099	NA	-0.489896	-0.360732	-0.67384	NA	-0.775417	-0.301458	-0.142045	-0.191432	-0.0899364	0.133753	0.183028	0.149846	0.204774	NA	NA	NA	NA	NA	NA	-0.181482
ARID2	-0.286828	-0.418877	-0.415567	-0.402909	-0.596712	-0.521491	NA	-1.03306	-0.883075	NA	NA	-0.989231	0.00845687	0.156127	0.0766598	0.310967	0.14153	0.209477	0.183684	0.104084	NA	NA	NA	NA	NA	NA	-0.334092
ARID3B	NA	NA	NA	NA	NA	NA	-0.700891	-0.703855	-0.817742	-0.55143	NA	-0.428539	-0.18678	-0.0218952	0.143926	-0.6118	-0.381242	-0.241689	-0.845865	-0.442768	NA	NA	NA	NA	NA	NA	-0.48957
ARID4A	-0.493185	-0.424708	-0.139651	-0.335864	0.327996	-0.564371	-0.704564	-0.671401	-0.469698	0.369858	0.0175975	0.0627386	-0.289712	-0.274979	-0.0906785	-0.233368	0.065169	-0.0635153	0.104901	0.0963549	NA	NA	NA	NA	NA	NA	0.144907
ARID4B	-0.376508	-0.331006	-0.822136	-0.184291	-0.404662	-0.81981	-0.263447	-0.254861	-0.352738	-0.406427	-0.421833	-0.151979	0.132969	-0.0130672	0.268293	1.00448	0.248812	0.255489	0.335488	0.262143	NA	NA	NA	NA	NA	NA	-0.394853
ARIH1	0.0587263	0.128074	0.0599406	-0.03811	-0.114505	-0.177604	-0.35237	-0.275192	-0.290141	-0.547223	-0.39224	-0.582288	0.303585	0.144302	0.0825405	0.242606	0.409277	0.555193	0.35933	0.490499	0.141935	0.488554	0.603257	0.150336	0.353452	0.239014	0.117737
ARIH2	-0.457886	-0.649522	-0.31527	-0.339157	-0.366649	-0.436038	-0.433044	-0.545583	-0.242652	-0.240393	-0.811913	-0.742468	0.0810181	0.109122	-0.148692	-0.277687	-0.229731	-0.0399873	-0.134472	-0.190275	-0.10322	0.159513	0.0414993	-0.311217	-0.147814	-0.295129	0.227616
ARL1	-0.178509	-0.145283	-0.159235	-0.717709	-0.928152	NA	-0.190638	-0.0286582	0.109037	0.202478	0.0132426	0.00887559	0.154821	-0.0226792	-0.0312471	0.0970643	0.142484	0.265682	0.163365	0.170648	NA	NA	NA	NA	NA	NA	-0.321655
ARL2	-0.781987	NA	NA	-0.704383	-0.946315	NA	-0.683173	-0.301416	-0.476119	-0.118094	-0.242367	-0.243901	0.0871766	0.137774	0.228154	-0.170671	-0.415818	-0.318255	-0.404694	-0.0927804	-0.532986	-0.815942	-0.810361	-0.27333	-0.482863	-0.454502	-0.0996221
ARL2BP	-0.886027	-1.01407	NA	-0.531555	-0.955197	-0.684759	NA	NA	NA	NA	NA	NA	-0.477451	-0.663885	-0.930934	-0.463681	0.0585444	0.185837	0.0802685	0.213496	-0.0929244	-0.487872	-0.699039	-0.914019	-0.869863	-0.506349	-0.149006
ARL3	-0.45576	-0.404746	-0.489878	-0.996431	NA	NA	-0.461553	-0.301416	-0.117201	0.0455104	-0.63649	-0.0180047	0.0667421	0.297441	0.0714202	-0.140963	-0.205535	-0.162042	-0.320389	-0.190346	-0.693052	-0.84802	-0.335721	-0.487872	-0.309537	-1.29189	-0.175474
ARL6IP4	0.0268043	-0.0978154	-0.0572884	-0.0884945	-0.17822	-0.118341	-0.245605	-0.675098	-0.35703	-0.228847	-0.465685	-0.203496	NA	NA	NA	NA	NA	NA	NA	NA	NA	NA	NA	NA	NA	NA	-0.119501
ARL6IP5	0.744836	0.741716	0.733129	0.748023	0.801678	0.68506	0.808576	0.86137	0.753381	0.590439	0.576439	0.633706	0.347364	0.611946	0.514518	0.755205	1.02356	0.906288	1.0185	1.11079	0.252589	0.185041	-0.0762724	0.10437	-0.0821478	-0.0641049	0.799207
ARL6IP6	-0.627255	-0.686337	-0.757916	-0.415726	-0.329741	-0.315779	NA	-0.620469	-0.804164	-1.03386	NA	NA	-0.707595	-0.659459	-0.527136	-0.447187	-0.641405	-1.02163	-0.426377	-0.514473	NA	NA	NA	NA	NA	NA	-0.176779
ARL8A	0.16318	-0.256542	0.154363	0.176105	-0.0262659	-0.188349	0.0326282	-0.010156	0.143801	0.360958	0.37794	0.514556	-0.295838	-0.137258	-0.275421	-0.327376	0.00854089	-0.0148046	0.0482036	0.00039836	-0.25152	-0.587706	-0.491988	-0.221525	-0.367748	-0.258295	0.209807
ARL8B	-0.354869	-0.172742	-0.321505	-0.554189	-0.25836	-0.44231	-0.366661	-0.339286	-0.253084	-0.399158	-0.566658	-0.56097	0.451609	0.0922382	0.0578275	0.468101	0.497953	0.477124	0.568648	0.52351	-0.209582	-0.0748587	-0.181976	0.0438446	-0.0679336	0.00850917	0.423881
ARMC1	-0.942145	-0.731678	-0.783856	-0.594309	-0.475544	NA	-0.405942	-0.308803	-0.452219	-0.909886	NA	-0.841111	0.0515559	-0.0547761	-0.0637183	0.164848	0.206075	0.237956	0.178211	0.281173	-0.65913	-0.323162	-0.349995	-0.394037	-0.555197	-0.293706	0.561676
ARMC10	-1.0248	-0.33415	-0.604102	-0.425567	NA	-0.854394	-0.401861	-0.548923	-0.160424	-0.290107	-0.796655	-0.588273	NA	NA	NA	NA	NA	NA	NA	NA	NA	NA	NA	NA	NA	NA	1.14328
ARMC6	-0.898146	-1.42215	-0.956295	-0.487683	-0.369395	-0.256424	NA	NA	-0.855471	-0.237745	-0.0687901	-0.247179	-0.132045	-0.17529	-0.297625	-0.202717	-0.393679	-0.351466	-0.469183	-0.344607	-0.263719	0.010166	-0.0707471	-0.182978	-0.181521	-0.0793807	-0.770801
ARMC8	-0.942145	NA	NA	-0.463665	-0.653496	-1.0176	-0.485356	-0.249902	-0.445006	-0.711025	-0.816636	-0.642374	-0.195493	-0.144865	-0.0609103	0.239985	0.270967	0.190295	0.0952082	0.192899	NA	NA	NA	NA	NA	NA	-0.24758
ARMCX3	NA	NA	NA	NA	NA	NA	NA	NA	-1.05555	-1.04353	NA	-0.761404	-0.211931	-0.144502	-0.0692008	-0.117668	-0.273935	-0.387356	-0.279808	-0.423205	-0.484228	-1.09586	-1.15794	-0.623189	-0.33445	-0.554498	-0.494854
ARMH3	-1.24402	NA	-0.741099	-1.04324	NA	NA	-1.00011	NA	-0.823314	-0.471638	-0.355497	-0.112719	-0.440688	-0.538242	-0.46232	-0.517211	-0.469487	-0.305116	-0.396819	-0.288571	NA	NA	NA	NA	NA	NA	-1.07165
ARMT1	-0.161609	-0.113476	-0.0608439	-0.820985	-1.04997	NA	-0.616954	-0.364091	-0.389809	-0.292467	-0.530438	-0.334295	0.301395	0.267904	0.24859	0.0619982	0.263113	0.235261	0.13149	0.28837	NA	NA	NA	NA	NA	NA	0.543321
ARPC1A	-0.337868	-0.418877	-0.341424	-0.68362	-0.335814	-0.564371	-0.140601	NA	-0.35703	-0.542749	-0.35354	-0.216569	-0.168779	-0.0236029	0.124048	-0.156589	-0.0742129	-0.108036	-0.219785	-0.0720085	NA	NA	NA	NA	NA	NA	1.97966
ARPC1B	2.16917	2.21394	2.1367	2.27969	2.25233	2.24402	1.6562	1.57569	1.45891	1.23725	1.31832	1.27684	1.64167	1.59493	1.59084	1.50648	2.14092	1.98746	1.69325	1.94813	1.80752	1.76592	1.52358	1.57606	1.61351	1.60171	2.19628
ARPC2	1.68073	1.73506	1.74134	1.70651	1.52695	1.54372	1.27591	1.0779	1.00979	1.04798	0.981505	0.989948	2.05071	1.89688	1.78555	1.94649	2.50098	2.55786	2.3092	2.76347	1.89455	2.27827	2.11145	1.65729	1.82949	1.6981	1.33568
ARPC3	1.78089	1.8021	1.83503	1.46122	1.44929	1.4592	1.30292	1.25988	1.16004	1.30527	1.33202	1.34255	1.15522	1.25357	1.23643	1.23505	1.35463	1.46447	1.4461	1.42886	0.776999	0.824883	0.660456	0.614016	0.673068	0.601116	1.51422
ARPC4	1.59406	1.53944	1.52881	1.59638	1.34468	1.27426	1.08115	1.1515	1.27288	1.34285	1.39449	1.45752	1.49458	1.38009	1.65112	1.19381	1.3725	1.51055	1.45219	1.65682	1.34138	0.851881	1.02443	1.30063	1.25263	1.00026	1.66305
ARPC5	1.20238	1.35479	1.20995	1.13751	1.11153	1.09179	0.882147	0.873069	0.872128	0.663442	0.718368	0.762157	1.19584	0.76834	0.996353	1.29541	1.05178	1.53792	1.04421	1.60853	0.924886	0.903271	0.814364	0.762521	0.762521	0.613057	1.85175
ARPC5L	0.513273	0.603263	0.518785	0.257736	0.0949935	0.136564	0.37917	0.696489	0.848923	0.810526	0.751192	0.798759	0.508138	0.460546	0.515031	0.460504	0.22504	0.281596	0.161511	0.207059	0.0698978	-0.576738	-0.675043	0.076562	-0.604243	-0.454304	0.670321
ARPP19	-0.0146851	-0.0107888	-0.0878063	-0.697911	-0.240773	-0.321929	NA	NA	-0.855471	-0.510887	-0.407695	-0.381085	0.318195	0.227647	0.181969	0.247326	0.185038	-0.0434344	0.170725	0.0497824	-0.601253	-0.982009	-0.700269	0.12803	-0.0455007	-0.00267193	0.822855
ARRB1	-0.129805	-0.142519	-0.0792267	0.0205648	0.0576767	0.109302	-0.319056	-0.435538	-0.359456	-0.678493	-0.423899	-0.539961	NA	NA	NA	NA	0.422807	0.392418	0.291031	0.42801	0.364158	0.554612	0.514931	0.101127	0.239807	0.205582	-0.231519
ARRB2	0.150495	0.185815	0.09533	0.276471	0.233513	0.290709	0.0659439	0.153596	0.346079	-0.0233935	-0.112385	-0.243901	0.345354	0.371114	0.287458	0.502937	0.485653	0.278658	0.278083	0.384374	0.334393	0.364929	0.296384	0.0940276	0.109075	0.122249	0.809526
ARSA	-0.265303	-0.140018	-0.219573	0.0468607	-0.029751	-0.0858486	-0.689519	-0.45012	-0.571373	NA	NA	NA	-0.682938	-0.986696	-0.794345	-0.619971	-0.238642	-0.00528853	-0.129688	-0.0322163	-0.242863	-0.864169	-0.455208	-0.525552	-0.684802	-1.17385	0.0953468
ASAH1	-0.24861	-0.175894	-0.121577	0.0585355	-0.294031	-0.521491	-0.112448	-0.0547326	-0.126058	-0.523213	-0.374668	-0.313023	-0.249742	-0.501395	-0.277481	-0.251866	0.0250567	0.0094275	-0.0812842	0.16506	-0.052474	-0.763812	-0.108114	-0.115062	-0.159822	-0.201878	0.862278
ASAP1	-0.141148	-0.21429	-0.23195	-0.274983	-0.410922	-0.691451	-0.731454	-0.282829	-0.226699	-0.915843	-0.936923	-1.14868	-0.264701	-0.141053	-0.0235805	-0.189256	0.251832	0.176581	0.321892	0.234694	-0.187056	-0.0416415	-0.916937	-0.461547	-0.349285	-0.460082	-0.122075
ASCC1	-0.529338	-0.892621	-1.16099	-0.544228	-0.823772	-0.773546	NA	NA	-1.06589	-0.954954	-1.17192	-0.734171	0.147848	0.011621	0.168839	-0.173548	-0.453412	-0.134084	-0.195167	-0.171266	-0.411557	-0.327408	-0.509525	-0.603434	-0.896569	-0.57286	-0.0535123
ASCC2	-0.341975	-0.821917	-0.318434	-0.674866	-0.644092	-0.361183	-0.473656	-0.620469	-0.800949	-0.71942	-0.976728	-0.674897	0.0237077	0.0672095	0.0427206	0.444911	-0.135058	0.0264904	0.0756454	-0.00326805	NA	NA	NA	NA	NA	NA	0.0696999
ASCC3	-0.0899293	-0.196387	-0.193838	0.18779	-0.377086	-0.649951	0.0455377	-0.0680104	-0.176341	-0.0106516	0.0202398	0.0216934	0.513353	0.581085	0.643593	0.400361	0.389739	0.494755	0.222611	0.2974	NA	NA	NA	NA	NA	NA	-0.828314
ASDURF	NA	-0.617096	NA	NA	NA	NA	NA	-0.696914	NA	-0.707148	-0.566658	-0.772614	NA	NA	NA	NA	NA	NA	NA	NA	NA	NA	NA	NA	NA	NA	NA
ASF1A	-0.45963	-0.508278	-0.51515	NA	NA	NA	NA	-0.175322	-0.141667	NA	NA	-0.323252	0.035001	-0.253087	-0.258789	-0.0636174	-0.379073	-0.321889	-0.535226	-0.786594	-0.354066	-0.107741	-0.211815	-0.462695	-0.610413	-0.473537	-0.516432
ASF1B	NA	NA	NA	NA	NA	NA	-0.382537	-0.973664	NA	-0.392002	-0.296895	-0.243901	0.329994	0.151889	0.16534	0.000906643	NA	NA	-0.746124	-0.787013	NA	NA	NA	NA	NA	NA	-0.521955
ASH2L	-0.199571	-0.227031	-0.23195	-0.253024	-0.342861	-0.234033	-0.47752	-0.236913	-0.490393	-0.767395	-1.16633	NA	0.553989	0.388699	0.35359	0.380572	0.574524	0.632404	0.628494	0.636095	-0.373413	-0.844425	-0.292917	-0.672999	-0.558464	-0.767177	0.0355303
ASL	-0.758649	-0.61223	-1.04817	-0.697142	-0.116403	NA	NA	-0.599914	-0.929615	NA	NA	NA	0.0463317	-0.136205	0.147536	-0.39362	-0.382575	-0.300627	-0.597572	-0.85857	-0.531482	-0.531482	-0.468586	-0.505469	-0.95847	-0.724937	0.390659
ASMTL	-0.281689	-0.153845	-0.15647	-0.28971	-0.218808	-0.244097	0.0851712	-0.286188	-0.176341	-0.40431	-0.252592	-0.381085	0.206991	0.236769	0.151777	0.164276	0.145035	0.226769	-0.0328367	0.295044	0.218283	0.223969	-0.159253	0.00234383	0.144433	0.0391385	0.0215528
ASNA1	0.119007	0.271767	0.241525	0.381681	0.346428	0.232028	0.434499	0.42179	0.529203	0.196966	0.0907287	0.192903	NA	NA	NA	NA	NA	NA	NA	NA	NA	NA	NA	NA	NA	NA	NA
ASNS	-1.29227	-1.3145	NA	-0.73754	-1.02075	-1.06801	0.443363	0.464814	0.506388	0.482713	0.315945	0.429466	0.729528	0.826644	0.833911	0.404831	-0.474871	-0.482217	-0.618106	-0.397946	-0.59162	-0.838892	-0.574117	0.782723	0.468856	0.456912	0.105056
ASPSCR1	-0.267234	-0.0940001	-0.384598	-0.472618	-0.404662	-0.366302	-0.685107	-0.353499	-0.64486	-0.500962	NA	-0.428539	-0.0566478	-0.417706	-0.154324	-0.191904	0.281741	0.189884	-0.00713605	-0.0657928	-0.0834203	0.0579549	0.0322896	-0.169905	-0.261513	-0.186165	0.115349
ATAD1	-0.345525	-0.309145	-0.321505	0.223801	-0.357621	-0.531487	-0.285062	-0.177868	-0.301615	-0.248619	-0.292591	-0.564322	-0.0326746	0.190013	0.140272	0.226886	0.345302	0.095011	0.325374	0.0923732	-0.60917	-0.748357	-0.607358	-0.460082	-0.676625	-0.605343	0.0551292
ATAD2	-0.208025	-0.263488	-0.237027	NA	NA	NA	-0.205939	-0.437543	-0.215575	-0.237745	-0.287434	-0.12743	0.635985	0.592981	0.706761	0.61096	-0.313307	-0.248513	-0.373619	0.0107979	NA	NA	NA	NA	NA	NA	-0.0834087
ATAD3A	0.10945	0.201625	0.269227	0.35971	0.306455	0.16133	0.44816	0.352796	0.417225	0.571	0.486933	0.429466	0.674486	0.77982	0.828825	0.823911	0.582122	0.510186	0.618477	0.560193	-0.313568	-0.171516	-0.241809	-0.42556	-0.274496	-0.4023	0.443929
ATAD3B	NA	NA	-0.79712	-0.839465	-0.608039	-0.56286	-0.274716	-0.111705	-0.571373	-0.0705972	-0.279991	-0.213581	-0.0355454	-0.135119	0.0617992	0.025859	-1.19386	-0.800491	NA	NA	NA	NA	NA	NA	NA	NA	NA
ATE1	-0.254415	-0.209474	-0.192137	-0.242894	-0.283645	-0.207361	-0.387924	-0.175322	-0.043938	-0.520246	NA	-0.441469	NA	NA	NA	NA	NA	NA	NA	NA	-0.252788	-0.414078	-0.200765	-0.0459199	-0.151861	-0.160809	0.0585382
ATF2	-0.907952	-0.773926	-0.754943	-1.09283	-1.05265	NA	-0.946169	NA	-1.08753	-0.384131	NA	-0.0298897	-0.334096	-0.380667	-0.0628147	-0.234915	-0.563853	-0.217751	-0.224339	-0.270416	NA	NA	NA	NA	NA	NA	-0.452561
ATG16L1	NA	-0.845381	NA	NA	NA	NA	-0.712387	-0.504937	NA	NA	NA	NA	-0.493841	-0.542403	-0.373858	-0.370528	-0.312899	-0.247323	-0.309392	-0.335243	-0.337833	-0.0793807	-0.241272	-0.638261	-0.56493	-0.43781	0.304758
ATG2A	-0.688934	NA	-0.589957	-0.826604	-0.821322	-0.801911	NA	-0.934825	NA	NA	NA	NA	NA	NA	-0.624175	-1.06607	-1.05583	-0.922697	NA	NA	NA	NA	NA	NA	NA	NA	0.164234
ATG3	-0.00580379	-0.115852	-0.0761754	-0.333918	-0.168872	-0.202796	0.0395716	-0.0570125	-0.0321894	-0.104959	0.0884523	0.0236168	0.166567	0.313278	0.204314	0.0264953	0.0734618	-0.0267558	-0.132597	0.00576355	0.327422	0.381378	0.48222	0.276565	0.299314	0.237476	-0.0244368
ATG4B	-1.06438	-0.797509	NA	-0.861115	-0.836968	-0.989993	-0.699911	-0.736011	-0.800949	-1.05226	-0.712414	-0.652182	-0.0172101	-0.190236	-0.117213	-0.1303	-0.122115	-0.233154	-0.359078	-0.232395	-0.89881	-0.707849	-0.926624	-0.286797	-0.336426	-0.343663	0.429605
ATG5	0.0398421	0.0852782	0.150614	-0.339157	-0.379409	-0.420922	-0.483207	-1.13284	-1.09104	-0.215066	-0.719044	-0.117363	0.186151	-0.0872967	0.0759461	-0.0584902	0.0751318	0.23257	0.183898	0.224606	NA	NA	NA	NA	NA	NA	0.414049
ATG7	-0.812504	-0.679279	-0.652359	-0.741502	-0.868092	NA	-0.504119	-0.100413	-0.339362	-0.195598	-0.634272	-0.524013	0.12601	0.101295	0.479064	-0.155688	-0.168739	-0.0870458	-0.222043	0.0247016	-0.502475	-0.33627	-1.03889	-0.602663	-0.89588	-0.890156	0.205282
ATIC	1.1586	1.17559	1.17186	1.23917	1.08179	1.05003	1.19794	1.35349	1.29079	1.25872	1.26292	1.18615	1.65263	1.80391	1.81541	1.53813	1.33995	1.37239	1.20342	1.33943	1.2926	1.51789	1.4183	1.31561	1.38872	1.36184	0.652857
ATL3	0.327203	0.339095	0.302647	0.40735	0.303727	0.237398	0.218346	0.212867	0.109951	0.25849	0.0298279	0.364329	NA	NA	NA	NA	0.730181	0.672641	0.773164	0.70045	-0.221525	-0.34582	-0.888019	0.102101	-0.325035	-0.0920661	0.258895
ATM	0.662811	0.685257	0.677976	0.662691	0.605638	0.533159	0.460699	0.300401	0.22367	0.251691	0.303371	0.257349	0.305127	0.241897	0.388108	0.451982	1.23923	1.36709	1.08778	1.11238	NA	NA	NA	NA	NA	NA	0.0935546
ATOX1	0.0737376	0.0717793	0.116778	-0.438165	-0.192368	-0.279552	-0.0585159	-0.0570125	0.250387	0.223597	-0.436791	0.173401	0.478957	0.134587	0.308853	0.228723	-0.00856253	-0.124727	-0.0974316	-0.351568	NA	NA	NA	NA	NA	NA	-0.300404
ATP11B	-0.765488	-0.731678	-0.557114	-0.463665	-0.470599	-0.704472	NA	NA	-0.393685	NA	-0.909968	NA	-0.20433	-0.202187	-0.0861788	-0.196708	0.140572	-0.079368	0.0956959	0.032144	-0.903836	-0.488216	-0.0035749	-0.922997	-0.852413	-0.325591	-0.385689
ATP13A1	-0.388967	-0.437876	-0.462959	-0.291177	-0.186624	-0.21106	0.258258	0.188474	0.167614	-0.14102	-0.0146231	-0.231933	0.317754	0.415621	0.522033	0.494887	0.408068	0.465301	0.494817	0.366983	-1.25037	-0.228707	-0.311527	-0.557476	-0.850962	-0.976357	-0.0713772
ATP1A1	0.757301	0.691709	0.70937	0.916379	0.762933	0.70785	0.901107	0.811221	0.896708	0.966806	0.961403	0.927275	1.33314	1.47643	1.57045	1.73672	1.158	1.25239	1.36809	1.13606	0.407376	0.227534	-0.188717	0.920017	0.450553	0.721326	0.346628
ATP1B3	0.318279	0.361519	0.32899	0.330682	0.0906864	0.139101	0.453865	0.360509	0.397953	0.281366	0.308556	0.387907	0.835606	0.981517	1.035	0.844426	0.412529	0.685695	0.47411	0.488653	-0.137818	-0.36172	-0.882163	0.051635	-0.359446	-0.051678	-0.0659122
ATP2A2	0.158486	0.123531	0.200288	0.209313	0.0102705	0.0596693	0.674368	0.74321	0.747412	0.619074	0.588898	0.60259	0.520304	0.766119	0.795419	0.757814	0.302887	0.243527	0.427885	0.233326	-0.28625	-0.161386	-1.08035	0.265812	0.0438446	0.0644389	0.288292
ATP2A3	0.729111	0.767683	0.75362	0.884198	0.705076	0.63198	0.683658	0.658041	0.744159	0.571	0.546232	0.607477	0.697112	0.773103	0.906395	0.861129	1.12081	0.976294	1.26392	1.03518	0.375724	-0.303393	-0.337833	0.63852	0.21265	0.294387	0.848469
ATP2B1	-0.566885	-0.934537	NA	-0.39443	-0.87118	NA	NA	NA	NA	NA	NA	NA	-0.40657	-0.41575	-0.473228	-0.353665	-0.250784	-0.404979	-0.39949	-0.708784	-0.729517	-0.662996	-0.697218	-1.19302	-0.739075	-0.91489	-0.0108398
ATP2B4	0.348623	0.245007	0.320665	0.377486	0.330481	0.324364	0.086974	-0.0509035	0.204952	-0.187807	-0.370051	-0.130343	0.454861	0.476794	0.565235	0.500207	0.469339	0.492091	0.625426	0.38182	0.051635	0.331003	-0.107014	0.404902	0.0685201	-0.053332	0.0916783
ATP5F1A	2.0325	2.01117	2.01152	2.11046	1.95353	1.91417	1.96932	1.75057	1.88323	1.90892	2.19097	1.75903	2.80141	2.96899	3.27375	2.79665	2.95337	3.37129	3.90077	3.4639	2.49565	2.49565	2.87235	2.44715	2.37065	2.37065	1.5809
ATP5F1B	2.55181	2.46237	2.43059	2.38202	1.99906	2.06911	2.24936	2.4426	2.30944	2.88161	2.85153	2.66488	4.20574	NA	NA	3.99678	NA	NA	NA	NA	2.44715	2.25887	2.13679	2.63069	2.24172	2.46876	0.791236
ATP5F1C	0.737755	0.776209	0.72389	0.739438	0.7826	0.792766	0.747407	0.655393	0.704957	0.692607	0.703208	0.621256	1.2298	1.39244	1.29957	1.30541	1.30638	1.33876	1.37938	1.12723	0.695145	0.769243	0.800693	0.620576	0.598199	0.552273	0.816173
ATP5F1D	-0.0911255	-0.313323	-0.406203	-0.0842465	0.313372	-0.0987116	-0.0828317	-0.156146	-0.192443	0.0599747	0.124205	0.139366	0.559699	0.425899	0.523959	0.850282	0.677624	0.560113	0.982548	0.7542	0.527279	0.459498	0.562013	0.577763	0.467472	0.288695	0.281081
ATP5F1E	0.276987	0.291196	0.320665	0.449474	0.495544	0.345047	0.136616	0.132146	0.118584	0.230524	0.150381	0.175982	NA	NA	NA	NA	NA	NA	NA	NA	NA	NA	NA	NA	NA	NA	-0.0962904
ATP5IF1	-0.0201492	0.0936319	0.217587	0.440397	0.304859	0.122809	0.158167	0.0470333	-0.126058	-0.263471	NA	-0.375325	-0.54384	-0.706106	-0.33853	-0.00185479	0.0427599	-0.0525312	0.0324617	0.0306625	NA	NA	NA	NA	NA	NA	0.604372
ATP5MD	0.0640103	0.126768	0.0458821	0.0553975	0.0244122	0.0343599	-0.24042	-0.29271	-0.30433	-0.206542	-0.2086	-0.267656	0.230397	0.207523	0.364454	0.417571	0.221165	0.200301	0.156575	0.161844	NA	NA	NA	NA	NA	NA	0.20903
ATP5ME	0.227542	0.0879584	0.110134	-0.0955622	0.197933	0.256304	-0.0184513	-0.576666	-0.213214	0.426886	0.506239	0.349291	0.73152	0.692388	0.694578	0.257117	0.520835	0.432665	0.536966	0.547368	NA	NA	NA	NA	NA	NA	0.308767
ATP5MF	0.172741	0.182623	0.165689	0.0802804	0.0412702	0.0218402	0.249249	0.20123	0.198336	0.202478	0.290021	0.146488	-0.455285	-0.0819958	-0.143199	-0.15434	-0.0675522	-0.186166	-0.508369	-0.464234	0.0356052	0.150336	0.213141	-0.0717543	-0.023284	-0.0849186	2.29504
ATP5MG	0.510181	0.498988	0.438853	0.446671	0.563591	0.477576	0.258258	0.292834	0.272193	0.276674	0.418447	0.34529	0.538215	0.613662	0.743623	0.62965	0.419672	0.65117	0.791466	0.677182	0.118697	-0.490887	0.228315	0.119583	-0.0278834	-0.72375	0.370068
ATP5MPL	-0.151952	-0.0447645	0.0268189	-0.130286	0.129344	0.0435935	NA	NA	NA	NA	NA	NA	-0.387275	-0.369326	0.172027	-0.387929	0.187253	0.168695	0.287724	0.182731	NA	NA	NA	NA	NA	NA	-0.466792
ATP5PB	0.809338	0.828509	0.80288	0.690516	0.88816	0.767246	0.570856	0.456732	0.434917	0.489472	0.516436	0.475209	0.901074	0.854406	1.06348	0.746409	0.99337	1.07284	1.10659	1.04597	0.834751	0.771853	0.772348	0.733227	0.71463	0.775498	0.626898
ATP5PD	0.750831	0.832181	0.833972	0.641616	0.69905	0.702109	0.646972	0.590619	0.593409	0.413683	0.435165	0.456952	1.02241	0.797143	1.05635	0.815543	0.919851	1.06309	1.26951	1.28558	0.861491	0.778202	0.646797	0.73597	0.74451	0.688625	1.83302
ATP5PF	0.289465	0.552215	0.554551	0.194821	0.293129	0.256304	NA	-0.464203	-0.536703	0.0025958	0.0502455	-0.023416	0.72499	0.606958	0.628849	0.745223	0.640138	0.650535	0.811373	0.744739	-0.785577	-0.419414	-0.711392	-0.890156	-0.652239	-0.389516	-0.0499273
ATP5PO	0.744836	0.784741	0.819871	0.703459	0.710583	0.721785	0.409639	0.43867	0.482254	0.810526	0.834933	0.762157	1.22198	1.2876	1.3859	1.08031	1.33427	1.41867	1.55459	1.43922	0.95617	0.922097	0.805896	0.808046	0.780559	0.680062	1.04543
ATP6AP1	NA	-1.5363	-1.05898	NA	-0.889625	NA	-0.768115	NA	-0.808254	-0.908522	-0.813693	NA	-1.00039	-0.353702	-0.117507	-0.157218	-0.163832	-0.12825	-0.140871	-0.144748	NA	NA	NA	NA	NA	NA	0.180145
ATP6V0A2	NA	NA	NA	NA	NA	NA	NA	-1.17425	-0.944937	-0.757984	NA	-1.02772	-0.43516	-0.155068	0.201903	-0.186099	-0.531467	-0.827715	-0.467439	-0.633974	NA	NA	NA	NA	NA	NA	0.0960819
ATP6V0C	-0.24861	-0.204237	-0.468686	-0.641775	-0.745588	-0.769148	-0.497761	NA	-1.15581	-0.675589	-0.44369	-0.717495	NA	-0.530428	-0.465703	-0.344899	-0.568343	-0.399689	-0.213484	-0.330184	NA	NA	NA	NA	NA	NA	0.171964
ATP6V0D1	NA	-0.931489	NA	NA	NA	-0.601913	-0.652617	-0.908511	NA	-0.471638	-0.255613	-0.184456	-0.16946	-0.267921	-0.0473101	-0.0778632	-0.186185	-0.0680646	0.0211765	0.0232088	NA	NA	NA	NA	NA	NA	-0.56894
ATP6V1A	0.371936	0.325921	0.374924	0.216427	0.400481	0.329167	0.507837	0.366672	0.301035	0.31494	0.388119	0.15296	0.885721	0.764558	0.806706	0.677003	0.637285	0.729368	0.7227	0.764373	0.659659	0.731749	0.674149	0.594604	0.629907	0.579001	-0.0231097
ATP6V1B2	0.296011	0.234484	0.269227	0.342108	0.344487	0.27135	0.470868	0.418963	0.318803	0.406827	0.239041	0.391935	0.756168	0.752347	0.819785	0.728598	0.564283	0.67116	0.52719	0.642599	0.654248	0.440151	0.726286	0.734061	0.650367	0.656657	0.24419
ATP6V1C1	-0.439877	-0.379067	-0.197322	-0.376508	-0.321641	-0.0888735	-0.294252	-0.378538	-0.389809	0.400543	0.267758	0.042717	0.139322	0.113561	0.13018	0.062276	0.220168	0.122488	0.245182	0.244399	-0.384424	0.13021	-0.874893	-0.406369	-0.592683	-0.422632	0.204503
ATP6V1D	-0.465506	-0.392002	-0.614579	-0.451959	-0.524269	-0.821979	-0.185953	-0.175322	NA	NA	-0.44369	-0.986867	0.154224	0.272682	0.206757	-0.053514	-0.0579338	0.0490189	-0.213312	-0.113208	-0.501831	-0.470728	-0.66279	-0.577541	-0.464823	-0.573618	-0.248883
ATP6V1E1	0.204661	0.241691	0.184836	-0.0630666	-0.151712	-0.0912939	-0.00613694	0.0654241	0.0200816	0.251691	0.249528	0.28078	0.4453	0.579172	0.461809	0.367454	0.163971	0.271428	0.043817	0.20603	0.113955	0.382137	0.304388	0.111846	0.0620738	0.042902	0.704968
ATP6V1F	-0.661738	-1.1609	NA	NA	NA	NA	-0.797853	NA	NA	-0.473443	-0.192885	-0.773574	0.144331	0.0957054	0.0540598	0.13742	0.0235333	0.161052	-0.147156	0.0193847	-0.354779	-0.292917	-0.724937	-0.333075	-0.200765	-0.756858	-0.529776
ATP6V1G1	-0.219627	-0.317802	-0.347397	-0.357423	-0.292439	-0.359142	-0.674225	-0.632815	-0.667049	-0.367682	-0.275641	-0.359678	0.175098	0.263448	0.179394	0.171027	0.0667314	-0.0952849	0.0191549	0.108547	0.0438446	0.140448	-0.24838	-0.17759	0.141226	0.0685201	1.18911
ATP6V1H	-0.117042	-0.196387	-0.301649	-0.399507	-0.415693	-0.513843	-0.472508	-0.156146	-0.581691	-0.821392	-0.943618	-0.670109	0.175385	0.267314	0.271361	0.169957	0.311673	0.214563	0.218286	0.357885	-0.870771	-0.104895	-0.37662	-0.465212	-0.345933	-0.542811	0.652587
ATRX	-0.226685	-0.108828	-0.0950422	0.0953365	-0.13573	-0.348869	-0.33644	-0.332109	-0.449206	-0.66194	-0.454779	-0.304452	0.167082	0.0607858	0.661284	0.795092	0.704329	0.841377	0.830854	0.692226	NA	NA	NA	NA	NA	NA	-0.452083
ATXN10	-0.209757	-0.202512	-0.216426	-0.110699	-0.273766	-0.376717	-0.14632	-0.00139596	0.185426	0.168862	-0.199618	0.265414	0.576325	0.640314	0.591637	0.591455	0.210056	0.283588	0.327473	0.326257	-0.633692	-0.505469	-0.226064	-0.32998	-0.426098	-0.376383	0.52978
ATXN2	NA	-0.813332	NA	-0.521269	-0.873484	NA	-0.879822	-0.799147	-0.931582	-1.10532	NA	NA	-0.261144	-0.0917939	-0.0653226	-0.13614	-0.258589	-0.19578	-0.351657	-0.393647	NA	NA	NA	NA	NA	NA	-1.06119
ATXN2L	0.113141	0.108863	0.0298586	0.18779	0.126022	0.204233	0.318295	0.244304	0.263595	0.318902	0.308556	0.277973	0.565348	0.701346	0.688907	0.679508	0.472665	0.332467	0.33076	0.374904	0.336685	0.250811	0.245214	0.498709	0.374391	0.462683	0.937768
ATXN3	-0.578279	-0.444612	-0.487865	-0.485095	-0.423139	-0.57631	NA	-0.915732	-0.944937	-0.629734	NA	NA	0.0299966	0.00328742	-0.0281166	-0.123404	-0.0862385	-0.109678	-0.0795252	-0.0711197	0.133011	-0.0907264	0.202493	-0.0564983	0.19706	-0.114774	0.967206
AUH	-0.87115	-1.02144	NA	NA	NA	NA	NA	NA	NA	NA	NA	NA	-0.382536	-0.17529	-0.256689	-0.240968	-0.135909	-0.115111	-0.162951	-0.145385	-0.508817	-0.761945	-0.356572	-0.7092	-0.731521	-0.789337	0.569486
AUP1	-1.27549	-0.799075	-0.671425	NA	NA	NA	NA	NA	-0.982581	NA	NA	NA	-0.338638	-0.0642534	-0.0216958	-0.484664	-0.298975	-0.246955	-0.336907	-0.282501	NA	NA	NA	NA	NA	NA	-0.0352722
AURKA	NA	NA	NA	NA	NA	NA	NA	NA	-0.553957	-1.0353	NA	-1.06871	-0.386264	-0.479569	-0.479722	-0.275147	-0.74372	-0.911167	-0.750517	-0.768656	NA	NA	NA	NA	NA	NA	NA
AURKB	NA	NA	NA	NA	NA	NA	-0.58639	-0.5188	-0.702362	-0.374539	-0.521697	-0.483422	0.147516	0.243928	0.280795	0.0320528	NA	NA	NA	NA	NA	NA	NA	NA	NA	NA	NA
AZGP1	-1.11816	-1.06378	-1.05333	NA	NA	-0.908247	NA	-1.03306	-0.46357	-0.425483	-0.361181	-0.475352	-0.654321	-1.15464	NA	NA	NA	NA	-0.373782	NA	-0.889341	-0.813269	-0.329206	-0.616781	-0.752843	-0.859577	0.216085
AZU1	0.106603	0.121549	0.102854	0.0553975	0.023562	0.0704819	NA	NA	NA	NA	NA	NA	NA	NA	NA	NA	NA	NA	NA	NA	-1.21683	-0.624592	-0.908928	-1.25037	-0.662996	-0.725341	-0.226111
B2M	0.557815	0.54657	0.415632	0.538266	0.530394	0.55343	1.8908	1.42364	1.57877	1.52753	1.44173	1.86785	1.10433	NA	NA	1.34032	NA	NA	NA	NA	0.350543	0.201199	-0.00879231	0.94895	0.427726	0.505541	NA
B3GAT3	-1.04089	-0.607757	-0.499703	-0.535256	-0.590609	NA	-0.421177	-0.608847	-0.488352	-0.932703	NA	NA	-0.154085	-0.302685	-0.254239	-0.275429	-0.0408217	-0.168549	-0.113757	-0.346769	NA	NA	NA	NA	NA	NA	-0.2947
BABAM1	-0.129805	-0.0891796	-0.0950422	-0.397291	-0.440953	-0.326905	-0.396944	-0.290557	-0.423063	-0.588184	-0.534594	-1.02404	0.206162	0.0851539	0.163034	-0.0867465	0.0683521	0.11456	0.0201873	0.00127237	0.129764	0.184186	0.225557	-0.0174143	-0.00582048	-0.0837564	0.19577
BABAM2	-0.103168	-0.130044	-0.223812	-0.307466	-0.267357	-0.292647	-0.0848013	-0.342177	-0.144114	-0.217514	-0.151004	-0.278296	0.180693	0.323516	0.30359	0.184605	0.624373	0.515671	0.331213	0.433363	0.110736	-0.687411	-1.0879	-0.941796	-0.416515	-0.552746	0.251608
BACH2	-0.854619	-0.834875	-1.09607	-0.633878	-0.445737	-0.716974	NA	NA	NA	-0.191561	0.227344	0.0257136	-0.354597	-0.413852	-0.406242	-0.625833	-0.091305	0.0355692	0.0334556	-0.0978112	NA	NA	NA	NA	NA	NA	-0.948834
BAG1	-0.642244	-0.345369	-0.415567	-0.322523	-0.216844	-0.659441	-0.177117	-0.133303	-0.0152355	NA	-1.57134	-0.629764	-0.299843	NA	-0.37238	0.0647539	-0.0703312	-0.0333078	-0.165286	-0.142693	-0.450248	-0.420211	-0.43134	-0.299606	-0.365965	-0.622104	1.11612
BAG2	-0.339341	-0.305827	-0.321505	-0.232488	-0.267357	-0.467877	0.0982651	0.180021	0.109037	0.137444	-0.255613	0.0172023	0.54865	0.379237	0.432905	0.534091	0.0347399	0.215311	-0.0868245	0.00327968	-0.198236	-1.04156	-0.61638	-0.540713	0.00650383	-0.0992428	-0.321508
BAG3	-0.150464	-0.183633	-0.246656	-0.863114	-0.629612	-0.73488	-0.709567	NA	-0.708427	-0.302959	-0.398556	-0.424384	NA	NA	NA	0.0996726	0.103008	NA	NA	NA	-0.243895	-0.270154	-0.590987	-0.144203	-0.388686	-0.263719	0.236939
BAG5	-0.166607	-0.142519	-0.161091	-0.542436	-0.747546	-1.02121	0.0244471	0.0299268	-0.152762	-0.274697	-0.187578	-0.135645	-0.175072	-0.157265	-0.113908	-0.192909	0.0181368	0.0560204	0.124573	0.0800736	0.0817814	0.0855699	0.231022	-0.043302	-0.000936892	-0.11745	0.915806
BAG6	0.206931	0.110266	0.154363	-0.134232	-0.0708087	-0.0372034	0.158167	0.0449299	0.176259	0.553817	0.564376	0.590789	0.434502	0.548136	0.704774	0.629291	0.417472	0.426661	0.220391	0.360146	-0.294669	-0.25152	0.0911143	0.059375	0.22086	0.211335	0.420891
BAK1	-0.480053	-0.313323	-0.444012	-0.523773	-0.316418	-0.383314	NA	-0.424793	-0.264343	-0.594422	-1.04605	-1.08233	-0.674045	NA	-0.00796883	-0.61842	NA	NA	NA	-0.429084	NA	NA	NA	NA	NA	NA	-0.326625
BANF1	0.891073	0.905081	0.864998	0.528982	0.677383	0.665228	-0.545274	0.318026	0.233341	1.09313	0.755216	0.830617	1.19071	0.914424	0.971844	1.32941	1.22242	1.12444	1.54494	1.2696	-0.128094	-0.343663	-0.640931	-0.0625639	-0.21773	-0.148162	0.104378
BAP18	0.392647	0.424072	0.427325	0.322163	0.245854	0.243502	0.0326282	-0.166546	-0.110192	0.0667642	0.0234192	0.0236168	NA	NA	NA	NA	NA	NA	NA	NA	NA	NA	NA	NA	NA	NA	NA
BASP1	-1.07781	-0.661519	NA	-0.826604	-0.477321	-0.840319	NA	-1.0494	NA	-0.0451626	-0.0257126	-0.0649284	NA	NA	NA	-0.59964	NA	-0.539556	NA	-1.04887	-1.25479	-1.55628	-1.47292	-1.36733	-1.40541	-0.970366	-0.0505501
BATF	NA	NA	NA	NA	NA	NA	-0.75157	-0.654498	-0.85796	-0.296865	-0.267356	-0.259224	-0.587416	-0.698332	NA	-0.778942	NA	NA	NA	NA	NA	NA	NA	NA	NA	NA	NA
BATF3	NA	NA	NA	NA	NA	NA	NA	NA	NA	-1.06174	-0.905163	-0.782045	-0.786839	-0.750387	-0.77591	NA	NA	NA	NA	-1.4452	NA	NA	NA	NA	NA	NA	NA
BAX	-0.0229659	-0.0703714	-0.153135	-0.206427	-0.246406	-0.684759	-0.366661	-0.240292	-0.0676501	0.0955808	0.0783618	0.0533521	0.491699	0.506793	0.428757	0.386485	0.353422	0.404757	0.266184	0.241442	0.0322896	0.213513	0.183981	0.039763	-0.170763	0.0329174	0.854841
BAZ1A	-0.70428	NA	-0.808347	-0.610524	NA	NA	-0.0802351	-0.128799	-0.110192	-0.0687949	0.0382544	0.134174	0.254532	0.376685	0.434447	0.667384	-0.00982534	0.0973012	0.0280435	-0.0137087	NA	NA	NA	NA	NA	NA	-0.377334
BAZ1B	0.379096	0.328342	0.322825	0.357513	0.236596	0.189911	0.412655	0.502186	0.462669	0.558363	0.524845	0.540664	0.658167	0.717027	0.777442	0.931574	0.832979	0.817792	0.827387	0.761644	NA	NA	NA	NA	NA	NA	-0.210891
BCAP29	NA	-0.591454	-1.08986	NA	NA	NA	NA	-0.856692	NA	-0.958358	-1.09151	-0.666915	NA	-1.15584	-0.427152	-0.28401	-0.286515	-0.461727	-0.217723	-0.278519	-0.7307	-0.891885	-0.650025	-1.24175	-0.972445	-1.0585	-0.415507
BCAP31	0.813785	0.865992	0.835905	0.843931	0.95818	0.939692	0.606982	0.574909	0.569636	0.30283	0.38578	0.331994	0.343738	0.50074	0.678029	0.866583	1.03497	1.12023	1.35654	0.936758	0.385544	0.362389	0.12138	0.0685201	0.0849619	0.476715	1.11821
BCAS2	0.188151	0.234484	0.154363	-0.0444861	-0.160963	-0.0937773	-0.0411556	0.0409815	0.0168159	0.208183	0.111953	0.139366	0.372236	0.324564	0.0702815	0.528293	0.399574	0.403638	0.5545	0.467149	NA	NA	NA	NA	NA	NA	0.672835
BCAS3	-0.336271	-0.55876	-0.27674	-0.39443	-1.09603	-0.984784	NA	NA	NA	NA	NA	NA	NA	NA	-0.455651	-0.557675	-0.0944332	-0.256539	-0.318592	-0.219122	-0.500011	-1.03535	-0.562483	-0.33917	-0.634215	-0.685702	-0.0554862
BCAT2	0.327203	0.277813	0.302647	0.167085	-0.00112838	-0.141445	0.249249	0.103141	0.162313	-0.352672	0.00221753	-0.000555123	0.57712	0.523678	1.35112	0.420356	0.419369	0.433899	0.526825	0.395189	-0.208639	-0.446866	-0.264936	-0.274851	-0.525982	-0.234581	0.157727
BCCIP	0.0665837	0.0697636	0.0494742	-0.255651	-0.335814	-0.451493	0.347788	0.428692	0.429265	0.594883	0.454171	0.512223	0.746371	NA	0.648061	0.519053	0.178078	NA	NA	0.19339	-0.52758	-0.874893	-0.271355	0.117284	-0.0375606	0.086032	-0.0663979
BCKDHA	0.176627	0.114485	0.102854	-0.0193494	0.117454	0.0419382	-0.100678	-0.435538	-0.132029	0.0100626	-0.192885	-1.39092	0.251768	0.317403	0.106498	-0.232511	0.400342	0.373109	0.541174	0.426278	0.237476	0.361684	0.349947	0.0960653	0.086032	-0.022095	0.218965
BCKDHB	-0.240281	-0.0390105	0.0247491	-0.112922	-0.160963	-0.0888735	-0.210362	-0.493473	-0.352738	-0.54132	NA	-1.21859	0.23744	0.0394137	0.0460639	-0.00268583	0.423691	0.450987	0.531968	0.500117	NA	NA	NA	NA	NA	NA	-0.306491
BCL10	-0.409533	-0.539301	-0.53161	-0.863114	NA	NA	-0.378817	NA	NA	-0.33943	-0.631744	-0.297549	-0.0207741	-0.140702	-0.19039	-0.2673	0.00381693	-0.0924685	-0.13836	0.05804	-0.124878	-0.39906	-0.0111965	-0.213004	-0.17759	-0.231234	-0.452307
BCL11B	0.230802	0.311994	0.291804	0.422478	0.187534	0.0619886	0.0326282	-0.0976524	0.0168159	-0.154022	-0.339445	-0.337301	0.189789	0.273647	0.393425	0.408584	0.82386	0.806199	0.949358	0.757112	NA	NA	NA	NA	NA	NA	0.303535
BCL2	0.362746	0.269614	0.309628	0.24017	0.169001	0.162971	0.391268	0.467096	0.422749	-0.0987473	0.148811	0.429466	-0.319365	-0.426907	-0.375252	-0.415261	0.0208744	0.0532007	-0.296522	-0.26757	NA	NA	NA	NA	NA	NA	-0.240355
BCL2L13	0.0725042	0.112508	-0.0899676	-0.0826918	-0.0882343	-0.137255	-0.0213857	0.0654241	0.0986228	-0.0106516	-0.174276	-0.0452028	-0.0891046	-0.0666533	-0.0946475	-0.412508	0.425183	0.423847	0.480661	0.396192	-0.0748587	-0.365896	-0.125523	-0.365896	-0.107311	-0.093273	1.8689
BCL3	NA	NA	NA	NA	NA	NA	NA	NA	NA	-0.999577	-1.00215	-1.03282	-0.949929	-0.369044	-0.430467	-0.610046	NA	-1.63825	-0.918521	-0.597729	NA	NA	NA	NA	NA	NA	NA
BCL7C	-0.0911255	-0.21429	-0.347397	-0.300361	-0.326529	-0.641311	-0.770906	NA	-0.769403	NA	-0.661372	-0.612053	-0.129522	-0.191815	-0.382867	-0.245786	0.00604932	-0.142068	-0.0862859	-0.046718	NA	NA	NA	NA	NA	NA	0.298123
BCL9	-1.10388	NA	-0.527616	NA	NA	NA	NA	NA	NA	NA	NA	NA	-0.892143	NA	NA	NA	-0.684163	-0.622253	-0.791431	-0.783842	NA	NA	NA	NA	NA	NA	-0.387608
BCL9L	-0.290229	-0.350745	-0.499703	-0.478576	-0.54424	NA	NA	NA	NA	NA	NA	-1.0542	-0.818863	NA	-1.08725	-0.534314	-0.0454915	-0.0836299	-0.280355	-0.025733	-0.187745	-1.17385	-0.364441	-0.463174	-0.823849	-0.275473	-0.712463
BCLAF1	0.646426	0.691709	0.652732	0.723118	0.674477	0.710973	0.530736	0.563223	0.502759	0.311501	0.356971	0.391935	NA	0.630825	0.624843	0.779694	NA	NA	NA	NA	NA	NA	NA	NA	NA	NA	0.640714
BCR	-0.254415	-0.0703714	-0.19987	-0.287427	-0.0566078	-0.433105	-0.644216	-0.561756	-0.585049	-0.23337	-0.875689	-0.906418	-0.0448513	-0.120029	0.0290028	0.160759	0.312368	0.257572	0.0194092	0.172406	-0.254793	-0.1178	-0.183344	-0.617391	-0.134069	-0.444309	-0.15982
BCS1L	-0.620427	-0.688024	-0.543423	-0.732748	-0.484541	-0.340804	-0.192942	-0.730001	-0.406591	NA	-0.498396	-0.447115	-0.151253	0.0155201	0.0898949	-0.103327	-0.126793	0.0591754	0.14279	0.147275	NA	NA	NA	NA	NA	NA	-0.67295
BDH1	0.175135	0.231921	0.198464	0.25137	0.126022	0.0902246	0.072564	0.150251	0.22367	-0.0839679	-0.324946	-0.175262	0.723981	0.680768	0.742951	0.533564	0.631956	0.685059	0.502513	0.517473	-0.0907264	-0.627161	-0.267315	-0.163163	-0.570135	-0.159253	0.152227
BDH2	-0.18145	-0.571384	-0.223812	0.322163	-0.18313	-0.168908	-0.43113	-0.286188	-0.377425	-1.09027	-1.06653	-1.05207	-0.145971	-0.226135	-0.177868	-0.470631	-0.221086	-0.135994	-0.0966456	-0.150943	0.450553	0.217746	0.315949	0.297602	0.217746	0.0587853	0.368989
BECN1	NA	NA	-0.92623	NA	NA	NA	NA	NA	NA	-0.734514	-0.954202	-0.861728	-0.539245	-0.748855	-0.40635	-0.543716	-0.368968	-0.389479	-0.531465	-0.274837	-0.249777	-0.21106	-0.371851	-0.744262	-0.882958	-0.911201	-0.0514276
BET1L	NA	-0.638059	-0.709408	NA	NA	NA	NA	NA	-0.920854	-1.33029	NA	-1.33338	NA	-0.81068	-0.431235	NA	NA	-0.727892	-0.413768	NA	NA	NA	NA	NA	NA	NA	NA
BICD2	NA	-0.514227	NA	NA	NA	NA	-0.914831	-0.960625	-0.490393	-0.539316	NA	-1.10543	0.0738637	-0.00445858	0.104722	-0.00382395	-0.333585	-0.404002	-0.235064	-0.470616	-0.0560064	-0.301666	-0.27333	0.137398	0.270103	0.329644	-0.100512
BID	-0.138671	-0.118486	-0.242486	-0.271042	-0.294031	-0.346502	-1.03225	-0.342177	-0.287515	-0.195598	-0.21125	-0.0147714	0.301887	0.111736	0.20022	-0.30168	0.0457148	0.265467	0.00384974	0.257758	0.0878151	0.119052	0.231681	-0.0592471	-0.79494	0.0488519	NA
BIN1	0.766929	0.729436	0.655864	0.638535	0.70321	0.677038	0.516137	0.450194	0.438767	0.185092	0.215557	0.286743	0.582966	0.421163	0.504412	0.581664	0.821198	0.772008	0.736353	0.876981	1.23041	0.68261	0.982083	1.00389	0.969326	0.862866	0.988178
BIN2	0.662811	0.741716	0.729636	0.742037	0.734911	0.715077	0.325118	0.330501	0.221007	0.364895	0.407058	0.356629	0.404625	0.303365	0.407297	0.569329	0.805102	0.818716	0.83545	0.932529	0.814364	0.878086	1.13074	0.556495	0.678863	0.600182	0.642583
BIRC5	NA	NA	NA	NA	NA	NA	-0.860853	NA	-1.1208	-1.01246	-1.25837	-1.05207	-0.349975	-0.858596	-0.737103	-0.206258	-1.30798	NA	NA	NA	NA	NA	NA	NA	NA	NA	NA
BIRC6	-0.70428	-0.458441	-0.551185	-0.474191	-0.72352	-0.548433	-0.648319	-0.782017	-0.366225	-0.367682	-0.587791	NA	0.442631	0.552425	0.636232	0.360168	0.230095	0.212998	-0.0480681	0.154414	NA	NA	NA	NA	NA	NA	-0.562822
BLM	0.188151	0.231921	0.213261	0.0468607	0.22406	0.273151	-0.104466	-0.104767	0.0109789	-0.0336441	0.0952579	0.0144692	0.324376	0.419405	0.233404	0.0491463	0.205326	0.416324	0.41281	0.369745	NA	NA	NA	NA	NA	NA	-0.127579
BLMH	0.248568	0.247265	0.230641	-0.209974	0.0266744	0.0383518	0.0549411	0.0206845	0.0852403	-0.0214757	0.0754166	0.0196635	0.673897	0.602707	0.223614	0.541645	0.527579	0.392792	0.386259	0.511128	-0.0363304	-0.836281	-0.260826	0.0770986	-0.0901811	0.131511	-0.0204247
BLOC1S1	NA	-0.36762	-0.527616	-0.468104	-0.297259	-0.281191	-1.05196	-0.950173	-0.989958	-0.748161	-0.989906	-0.948611	-0.263483	-0.265571	-0.27921	-0.273406	-0.097607	0.0848539	-0.12746	-0.0193903	-0.486397	-0.145459	-0.141786	-0.621293	-0.526243	-0.790454	0.657228
BLOC1S2	-0.0960896	-0.140018	-0.0651671	-0.436355	-0.299671	-0.323588	-1.0399	-0.457306	-0.610466	-0.606215	-0.433838	-0.504332	-0.0282063	-0.156614	-0.10651	-0.0147293	-0.113221	-0.0896253	0.0028338	-0.0333704	0.150336	0.205582	-0.290827	0.285977	-0.333965	0.0353952	0.43421
BLOC1S3	NA	-0.323494	-0.36954	-0.447111	-0.192368	NA	-0.396944	-0.40657	-1.10524	-0.311037	-0.398556	-0.844952	0.121188	-0.424585	-0.220601	-0.0448443	-0.0708927	-0.26947	-0.0171676	-0.0888342	-0.832141	-0.774967	-0.449162	-1.20533	-0.490462	-0.633692	-0.17699
BLOC1S4	-0.178509	-0.235865	-0.297792	-0.719214	-0.728512	NA	NA	-0.819691	-0.684996	-0.695346	-0.505339	NA	-0.409844	-0.26848	-0.461207	-0.271122	-0.239795	-0.193111	-0.459898	-0.258315	-0.258508	-0.165892	-1.04156	-0.256299	-0.317298	-0.346489	NA
BLOC1S5	-0.657322	-0.548563	-0.427108	-1.04582	-1.13558	NA	-1.04761	NA	-1.01739	-1.00916	NA	NA	-0.209761	-0.273806	-0.139712	-0.119016	0.108255	-0.111183	-0.220947	-0.0825346	-0.45252	-0.62507	-0.312789	-0.723438	-0.567873	-0.71204	NA
BLOC1S6	-0.84916	NA	-0.781913	NA	NA	NA	NA	NA	-0.98409	-0.300374	NA	-0.238133	-1.03711	NA	-1.34403	NA	-0.182768	-0.167068	-0.252972	-0.231416	NA	NA	NA	NA	NA	NA	NA
BLVRA	0.190375	0.255906	0.233672	0.164323	0.154818	0.16439	-0.0184513	0.0745861	0.148866	-0.256198	-0.311316	-0.286276	0.642541	0.618343	0.606684	0.300396	0.124257	0.378832	0.0946369	0.264858	0.408614	-0.00524066	0.359697	0.355625	0.298199	0.0557377	0.159015
BLVRB	-0.135697	-0.14849	-0.211539	-0.291177	-0.328177	-0.281191	-0.217515	-0.262926	0.0146133	-0.384131	-0.751395	-0.357672	0.0649023	0.197248	0.147368	0.121741	0.154156	0.263789	0.0936549	0.157946	0.136982	0.0402337	0.204392	-0.0226726	0.132488	-0.0242593	0.244691
BMS1	-0.0315343	-0.135174	-0.107565	0.389374	0.626359	0.667864	0.222351	0.158352	0.182026	0.509142	0.308556	0.559424	0.455352	0.581558	0.575919	0.51171	0.579291	0.484155	0.607312	0.514322	NA	NA	NA	NA	NA	NA	-0.085055
BNIP1	NA	-0.94066	-0.945784	-0.791616	NA	-0.816969	-0.632678	-0.484884	-0.748282	-0.319278	-0.738599	-0.133411	0.0252212	0.127836	-0.00343608	0.286362	-0.21619	-0.148055	-0.224099	-0.211087	NA	NA	NA	NA	NA	NA	-0.351062
BNIP3L	-1.63371	-0.521	NA	NA	NA	NA	NA	NA	NA	NA	NA	NA	-0.360551	-0.484835	-0.394521	-0.612225	-1.1542	-0.702777	-0.592139	-0.731633	NA	NA	NA	NA	NA	NA	NA
BOD1L1	0.0358475	-0.159025	0.0171737	0.15025	-0.0974686	-0.0280443	-0.287431	-0.0606535	-0.0926995	-0.324942	-0.502745	-0.432885	NA	NA	NA	NA	NA	NA	NA	NA	NA	NA	NA	NA	NA	NA	-0.201443
BOLA1	-0.598994	-0.503527	-0.690827	NA	NA	NA	NA	-0.778736	NA	NA	-0.604136	-0.447115	-0.366755	-0.168351	-0.432709	-0.574365	NA	-0.472173	NA	-0.328115	NA	NA	NA	NA	NA	NA	-0.221096
BOLA2B	0.674169	0.646034	0.650624	0.409578	0.571777	0.557768	1.0018	0.500298	0.719218	0.897704	0.816445	0.889754	NA	NA	NA	NA	NA	NA	NA	NA	NA	NA	NA	NA	NA	NA	0.166825
BOP1	-0.0445478	0.0522282	-0.116665	-0.0193494	-0.0942701	-0.0888735	0.347788	0.268216	0.29712	0.172571	0.227344	0.255428	0.547099	0.486775	0.513561	0.574905	0.335357	0.383661	0.205513	0.19905	NA	NA	NA	NA	NA	NA	0.40172
BORCS5	-0.981138	-1.0005	-0.944345	-0.682125	-0.427552	-0.582104	-0.858494	-1.23013	NA	NA	-0.601654	-1.10543	-0.165656	-0.269509	-0.0894218	-0.160045	-0.0940941	-0.0884967	0.0314341	-0.106853	-0.435089	-0.675218	-0.215356	-0.562483	-0.493875	-0.524472	-0.40649
BORCS6	NA	-0.61503	-0.480053	-0.571378	-0.448421	-0.646677	-0.641081	-0.659858	-0.728835	-1.03828	-1.00617	NA	-0.370935	-0.257577	-0.193106	0.0170257	-0.0520438	0.142108	0.0752465	-0.0358043	0.222033	0.225557	0.198596	-0.0633927	0.102331	0.0196058	-0.0058594
BORCS7	-0.360268	-0.327321	-0.372295	-0.540578	-0.700136	-0.609226	-0.520584	-0.693635	-0.488352	NA	NA	-0.395589	-0.205636	-0.419391	-0.31368	-0.296725	-0.275409	-0.160291	-0.254322	-0.096282	NA	NA	NA	NA	NA	NA	-0.168712
BORCS8	NA	NA	-0.812798	NA	-0.616174	-0.750804	NA	NA	NA	NA	NA	NA	-0.782494	-0.142778	-0.635842	-0.253507	-0.409819	-0.423726	-0.334432	-0.377118	NA	NA	NA	NA	NA	NA	-0.21476
BPGM	-0.507961	-0.480434	-0.468686	-0.557361	-0.531099	-0.479854	-0.825811	-0.566099	-0.684996	-0.863523	NA	-0.566283	-0.473026	-0.40917	-0.310483	-0.329214	-0.417424	-0.0933089	-0.280985	-0.0172638	-0.275473	-0.224369	0.0215119	-1.01118	-0.23811	-0.489725	-0.319974
BPHL	-0.488238	-0.390116	-0.42921	-0.654016	-0.704538	-1.07339	-0.403735	-0.7581	-0.977282	NA	NA	NA	-0.425992	-0.445099	-0.432983	-0.76771	-0.230309	-0.380412	-0.148488	-0.213483	NA	NA	NA	NA	NA	NA	-0.33236
BPI	-0.70428	-0.44667	-0.60975	-0.961235	-0.946315	-0.813409	NA	NA	NA	NA	NA	NA	-0.509026	-0.723465	-0.442459	-0.165681	-0.372347	-0.12126	-0.820225	-0.328897	NA	NA	NA	NA	NA	NA	NA
BPNT1	0.324703	0.37667	0.221347	0.156057	0.182352	0.222638	0.198045	0.163232	0.0852403	-0.0649166	0.0830106	0.0836556	0.657568	0.546394	0.510543	0.223617	0.572756	0.515092	0.422906	0.503186	0.214175	0.281793	0.317866	0.214656	0.137398	0.144433	0.328397
BPTF	-0.55408	-0.991405	NA	0.0149419	-0.613542	-0.44231	-0.674225	-0.891094	-0.648606	-0.399158	-0.143638	-0.615976	0.134452	0.114952	0.255175	0.162447	0.314317	0.272596	0.404553	0.292807	NA	NA	NA	NA	NA	NA	-0.580228
BRAT1	-0.961216	NA	-1.29825	NA	NA	-1.2079	-0.650225	-0.416367	-0.728835	-0.144775	0.0783618	0.204774	-0.00385279	-0.0810557	-0.120383	0.00432912	-0.19074	-0.173576	-0.359988	-0.159635	NA	NA	NA	NA	NA	NA	-0.61192
BRCC3	0.0970382	0.0504484	0.297588	-0.139201	0.0412702	0.0902246	0.204383	-0.133303	0.304026	0.400543	0.311646	0.438589	0.606814	0.507345	0.520816	0.463095	0.669841	0.720289	0.503637	0.652962	0.349157	0.0261405	0.288058	-0.023284	0.166077	0.11439	0.691764
BRD1	-0.419919	-0.638059	-0.450055	-0.367763	-0.924171	-0.834366	-0.58906	NA	-0.352738	NA	NA	-0.539961	-0.283136	-0.0922986	-0.167911	0.0455244	0.299564	0.425566	0.288103	0.237033	NA	NA	NA	NA	NA	NA	-0.664285
BRD2	-0.3227	-0.168368	-0.25985	-0.0907565	-0.0373318	-0.298495	-0.271031	-0.19114	-0.386112	-0.592085	-0.734563	-0.378262	0.223155	0.072903	0.19762	0.246701	0.172571	0.27056	0.258295	0.312715	NA	NA	NA	NA	NA	NA	0.267636
BRD3	-0.0807662	-0.105214	-0.0924179	-0.359432	-0.155964	-0.135069	-1.05452	-0.682406	-0.742207	-1.02117	-0.642639	-1.2492	-0.10759	0.000525996	-0.100921	0.148762	0.308284	0.381341	0.292627	0.235616	NA	NA	NA	NA	NA	NA	0.016743
BRD4	0.0851486	0.163171	0.295408	0.229013	0.0949935	0.0483972	-0.183071	-0.248409	-0.152762	-0.0937811	-0.267356	-0.0147714	0.441697	0.490069	0.570557	0.571523	0.670917	0.630312	0.659804	0.607234	NA	NA	NA	NA	NA	NA	0.12641
BRD9	-0.989936	NA	NA	-0.413937	NA	NA	NA	NA	NA	NA	NA	NA	-0.421119	-0.463747	-0.424875	-0.629953	-0.196663	-0.329583	-0.400695	-0.30325	NA	NA	NA	NA	NA	NA	0.0712971
BRIX1	0.304127	0.334358	0.29989	0.19676	0.280675	0.35623	0.822616	0.68046	0.612273	0.707737	0.621937	0.684468	0.435908	0.418635	0.462625	0.561839	0.442723	0.519072	0.404126	0.449329	NA	NA	NA	NA	NA	NA	0.563077
BRK1	-0.42224	-0.186691	-0.442166	-0.337194	-0.502466	-0.467877	-0.916145	-0.489896	-0.4922	-0.33943	-0.0915313	-0.0674227	0.121672	-0.0938168	-0.328624	0.19289	-0.0606586	-0.0528428	0.100237	0.107364	NA	NA	NA	NA	NA	NA	0.375916
BRMS1	-0.817807	NA	NA	-0.525564	-1.09067	NA	NA	-0.599914	-0.757145	-0.645023	NA	NA	-0.519054	-0.712929	-0.750448	-0.302533	-0.575413	-0.186548	NA	-0.551891	NA	NA	NA	NA	NA	NA	0.034928
BROX	-0.0807662	-0.0729338	0.0148907	0.0355136	0.0798725	0.109302	-0.0234777	-0.0585924	-0.246828	-0.256198	-0.151004	-0.273422	0.0356131	-0.195342	-0.170361	-0.0615838	0.210784	0.109012	0.0413732	0.260326	NA	NA	NA	NA	NA	NA	0.329679
BRPF1	-0.308099	-0.406536	-0.301649	-0.461053	-0.93506	-0.304081	-0.761353	-0.783792	-1.12883	NA	NA	NA	-0.706583	-0.558723	-0.46667	-0.219159	0.223102	0.132442	0.318647	0.188341	NA	NA	NA	NA	NA	NA	-0.325322
BSDC1	-0.692644	-0.743886	-0.82996	NA	NA	NA	-0.574402	-1.29863	-0.837938	NA	-0.572691	-1.40591	-0.243246	-0.223773	-0.294345	NA	-0.25332	-0.262723	-0.304603	-0.414441	-0.0389185	-0.567617	-0.043302	-0.266146	-0.194374	-0.329686	0.385656
BSG	0.102166	0.0545043	0.1794	0.0953365	-0.01634	-0.06295	0.347788	0.324192	0.294817	0.186866	0.168393	0.259199	0.362545	0.463604	0.348145	0.374326	-0.499748	-0.625225	-0.213964	-0.270083	0.160034	0.210645	0.244659	0.414052	0.331003	0.553115	-0.504694
BST2	-0.497243	-0.543365	-0.573238	-0.291177	-0.962676	NA	-0.33005	0.254356	0.173096	-0.0913747	-0.267356	-0.0905428	-0.374126	-0.465661	-0.0673796	0.34893	-0.148194	-0.342213	-0.404489	-0.257793	NA	NA	NA	NA	NA	NA	-0.0704662
BTAF1	-0.371277	-0.379067	-0.555395	-0.485095	-0.408722	-0.750804	-0.223948	-0.483195	-0.177725	-0.294523	-0.382672	-0.361618	0.208789	0.366115	0.253318	0.194765	0.156928	0.165353	1.36106	-0.128988	-0.469528	-0.433494	-0.135672	-0.429607	-0.405129	-0.365088	-0.301605
BTF3	-0.0565126	0.0770534	-0.0608439	-0.15982	0.0216813	-0.0535808	0.710523	0.286513	0.427312	0.387223	0.572401	0.519348	0.864545	0.901732	0.894019	0.721649	0.522884	0.495108	0.4187	0.66723	-0.0649295	-0.108114	0.115565	0.437298	0.0933624	0.290736	1.85868
BTF3L4	0.256965	0.25215	0.251704	-0.0797551	0.306455	0.215598	0.497474	0.592025	0.214095	0.151065	0.190339	0.429466	0.511328	0.336157	0.298451	0.407021	0.778673	0.748143	0.701027	0.852714	0.147523	0.15464	0.291171	0.21994	0.185041	0.107051	0.519996
BTG1	-0.88874	-0.889	-0.777219	NA	NA	NA	NA	NA	NA	NA	NA	NA	-0.78373	-0.871806	NA	NA	NA	-0.629394	NA	NA	NA	NA	NA	NA	NA	NA	-0.9559
BTN3A3	-0.0445478	0.0219555	-0.135715	0.0623562	-0.196564	-0.196753	-0.0475683	-0.147261	-0.114747	-0.808199	-1.07972	-0.730347	-0.2261	-0.193453	-0.127314	0.829351	0.378187	0.329498	0.438538	0.385999	0.371909	0.286973	-0.113751	0.14785	0.143581	0.125327	0.190973
BUB3	0.557815	0.555869	0.541952	0.761535	0.657075	0.603807	0.630032	0.566997	0.498628	0.500206	0.486933	0.364329	0.685383	0.699669	0.808916	0.905407	0.776006	0.730698	0.668495	0.753607	0.43056	0.48222	0.248845	0.318546	0.294879	0.161816	0.0106375
BUD13	-0.579712	NA	-0.54879	-0.828141	-0.551278	-0.782099	-0.992678	NA	-0.820232	-0.852787	-0.786884	-0.846665	0.0555981	-0.0766405	0.0732334	0.312886	-0.0514618	-0.0938105	0.0651468	-0.2197	NA	NA	NA	NA	NA	NA	-0.134152
BUD23	-0.649778	-0.410911	-0.453516	-0.549728	-0.211097	-0.229832	0.0549411	-0.58168	-0.297624	-0.627087	-0.345246	-0.896641	-0.23099	-0.053658	-0.27457	0.0739768	0.0516383	-0.214713	0.048469	-0.151962	-0.646298	-0.623189	-0.845447	-0.553273	-0.600083	-0.558254	0.0100702
BUD31	0.244859	0.23712	0.193583	0.300411	0.22056	0.16439	0.12578	0.351222	0.266943	0.339367	-0.0330669	0.226151	0.214669	0.222885	0.233536	0.145565	0.278207	0.330017	0.315005	0.28158	-0.312623	-0.704666	-0.255267	-0.31414	-0.327408	-0.283173	-0.00912731
BYSL	-0.0880294	-0.175894	-0.262708	-0.345973	-0.3103	-0.405126	0.182278	0.14403	0.17841	0.440271	0.438754	0.440633	0.274486	1.19187	0.553419	0.580153	0.218937	0.101134	0.0861827	0.0209078	-0.649125	-0.808754	-0.912756	-0.439022	-0.450655	-0.480652	-0.188324
BZW1	0.30915	0.220848	0.249908	0.276471	0.389773	0.246755	0.457696	0.374356	0.242176	0.546537	0.696812	0.695779	0.653855	1.01481	0.896841	0.924517	0.652747	0.734918	0.614314	0.73402	0.538315	0.540073	0.367038	0.734968	0.706889	0.677049	0.80318
BZW2	-0.763567	-0.457229	-0.738311	-0.384739	-0.331277	-0.338675	-0.0679325	-0.265478	-0.240315	0.0935751	0.0132426	0.0577848	0.433768	0.530208	0.405135	0.640361	0.413444	0.211082	0.240343	0.191722	0.0510651	0.171036	-0.105118	0.279431	0.288695	0.454326	-0.226465
C11orf54	0.276987	0.195041	0.156984	-0.0558354	0.0705427	0.0832917	0.2978	0.135042	0.263595	0.145076	0.182272	0.0386831	0.276804	-0.140415	-0.18585	-0.0324325	0.548037	0.547624	0.274422	0.384748	-0.105118	-0.44547	-0.735735	-0.104513	-0.44663	-0.213805	-0.0901682
C11orf68	-0.293034	-0.258459	-0.151005	-0.527101	-0.338151	-0.403933	-0.454667	-0.410245	-0.437614	-0.962993	NA	NA	-0.031844	-0.0673617	-0.0239093	-0.434907	0.0834792	0.192684	-0.0716658	0.172523	-0.0783747	-0.881586	-0.035755	-0.17523	-0.223367	-0.317298	0.362131
C11orf98	0.0752133	0.17267	0.00507863	0.141517	0.116288	0.0969095	-0.0931296	-0.0876093	-0.0561877	-0.146499	0.137417	0.0477734	NA	NA	NA	NA	NA	NA	NA	NA	NA	NA	NA	NA	NA	NA	NA
C12orf10	0.0774808	-0.0284577	-0.0770693	-0.0842465	-0.0373318	-0.523905	-0.232233	0.163232	-0.429812	0.00541859	0.0783618	0.114813	NA	NA	NA	NA	NA	NA	NA	NA	NA	NA	NA	NA	NA	NA	0.0219815
C12orf45	NA	NA	NA	NA	NA	NA	NA	NA	NA	NA	NA	NA	-0.608533	NA	-0.833997	-0.462623	NA	-0.781952	-0.73091	-0.886244	NA	NA	NA	NA	NA	NA	NA
C12orf57	NA	NA	NA	NA	NA	-1.16968	NA	NA	-1.42769	-0.845053	-0.419272	-0.429758	-0.217903	-0.207921	-0.353733	-0.671621	-0.911392	NA	-0.709048	-0.812442	-0.488216	-0.226665	-0.902915	-0.116545	-0.574904	-0.322231	0.77784
C15orf40	-0.606307	-0.518715	NA	-0.712502	-0.462782	-0.888061	-0.718945	NA	-0.953934	-0.663528	NA	-0.466824	-0.32065	-0.297039	-0.278713	-0.429414	-0.154048	-0.190275	-0.344266	-0.322799	NA	NA	NA	NA	NA	NA	-0.638268
C16orf54	-0.53348	-0.55876	-0.195684	-0.445465	-0.720456	NA	NA	NA	NA	NA	NA	NA	NA	-0.919827	NA	-0.602411	-0.515352	-0.268922	-0.511933	-0.376909	NA	NA	NA	NA	NA	NA	-0.285198
C16orf58	-0.254415	-0.299253	-0.304462	-0.685219	-0.477321	-0.730284	-0.0828317	-0.35939	-0.316522	-0.779757	-0.947331	-0.641316	NA	NA	NA	NA	NA	NA	NA	NA	NA	NA	NA	NA	NA	NA	0.59422
C17orf75	NA	-1.15576	-0.92006	NA	NA	NA	-0.860853	NA	NA	-0.865536	NA	NA	-0.718403	-0.313668	-0.475979	-0.561936	-0.0627608	-0.272254	-0.329696	-0.0976181	-0.438546	-0.410909	-0.610154	-0.333965	-0.512588	-0.333075	-0.435574
C18orf25	NA	NA	NA	NA	NA	NA	NA	NA	NA	NA	NA	NA	NA	NA	NA	NA	NA	NA	NA	NA	NA	NA	NA	NA	NA	NA	-0.852793
C19orf25	-0.961216	-0.807256	-0.87123	NA	NA	NA	-0.887402	NA	NA	-0.16283	-0.416774	-0.959778	-0.571558	-0.63941	-0.813546	-0.723835	-0.219745	-0.257324	-0.135038	-0.206447	NA	NA	NA	NA	NA	NA	-0.114072
C19orf53	0.248568	0.2656	0.237046	0.237367	0.381053	0.329167	0.147181	-0.325014	-0.172445	-0.220583	-0.255613	-0.234885	-0.670608	0.140851	-0.183001	0.173351	0.168481	0.340238	0.0606812	-0.481128	NA	NA	NA	NA	NA	NA	-0.499887
C1orf174	-0.246058	-0.369148	-0.341424	-0.505745	-0.114505	-0.256424	-0.250916	-0.151276	-0.35703	-0.280593	-0.220731	-0.247179	-1.11105	-0.473459	-0.453848	-0.22654	-0.0769153	-0.0673668	0.0598876	-0.000901381	NA	NA	NA	NA	NA	NA	-0.177432
C1orf50	-1.07226	-0.931489	NA	NA	NA	NA	NA	NA	NA	NA	NA	NA	-0.308702	-0.568437	NA	NA	-0.692513	-0.652907	-0.707029	-0.696106	NA	NA	NA	NA	NA	NA	-0.265388
C1orf52	NA	NA	NA	NA	NA	NA	NA	NA	NA	NA	NA	NA	-0.278481	-0.489096	-0.395342	-0.97557	-0.520353	-0.520805	-0.757829	-0.694285	NA	NA	NA	NA	NA	NA	-0.528874
C1QBP	0.715816	0.71482	0.708344	0.496973	0.204471	0.239443	0.783049	1.28504	1.12414	1.06611	0.795202	0.948113	1.30924	1.15601	1.0593	1.11325	0.961098	0.970389	1.27145	1.07292	0.685775	0.729872	0.857117	0.905285	0.6913	0.730823	0.243877
C20orf27	-0.396426	-0.427233	-0.334226	-0.442515	-0.462782	-0.632863	-0.313549	-0.845249	-0.446708	-0.279112	-0.279991	-0.40654	0.109792	0.00389997	0.0148962	0.0470735	-0.144126	0.0653944	-0.145444	-0.119432	-0.141129	-0.407862	-0.228707	0.0386082	-0.0428533	-0.0398631	-0.594556
C2CD5	-0.131622	-0.151488	-0.13399	-0.0101955	-0.206238	-0.321929	-0.248387	-0.203012	-0.403056	-0.475662	-0.311316	-0.306111	0.0458431	0.0298159	0.165108	0.0774758	0.262025	0.157905	0.183119	0.307539	-0.657314	-0.888019	-0.653063	-0.978024	-1.27075	-0.746379	NA
C2orf49	NA	NA	NA	-0.851395	-0.785965	NA	NA	NA	NA	-0.951963	-0.974917	-0.989231	-0.101257	-0.0944833	-0.102755	-0.482852	-0.49	-0.387638	-0.539345	-0.493229	NA	NA	NA	NA	NA	NA	0.308971
C3	NA	NA	NA	NA	NA	-0.411208	-0.362694	-0.464203	-0.408827	0.126755	0.233261	0.109598	1.87238	1.01913	0.650732	1.67469	0.916956	0.773037	3.01397	2.33916	NA	NA	NA	NA	NA	NA	1.24559
C3orf38	NA	NA	NA	NA	NA	NA	-1.10359	NA	-0.587327	NA	NA	-1.06722	-0.49978	-0.442132	-0.439405	-0.608856	-0.59695	-0.517079	-0.579546	-0.460819	NA	NA	NA	NA	NA	NA	-0.342428
C4A	NA	NA	NA	NA	NA	NA	-0.791671	-0.838005	-0.863205	-0.471638	-0.606119	-0.422	-0.0394822	-0.529996	-0.403941	-0.5688	-0.564615	-0.686563	0.167093	-0.0139068	NA	NA	NA	NA	NA	NA	1.35993
C4B_2	NA	NA	-0.769658	-1.54768	NA	NA	0.0585163	0.00426266	0.00457557	0.688669	0.621937	0.607477	NA	NA	NA	NA	NA	NA	NA	NA	NA	NA	NA	NA	NA	NA	NA
C4BPA	NA	NA	NA	NA	NA	NA	NA	NA	-0.745665	-0.0214757	0.00534505	-0.123731	0.687741	0.206627	0.713999	0.628357	-0.47998	-0.0171824	1.34755	1.29991	NA	NA	NA	NA	NA	NA	-0.0710762
C5orf22	NA	-0.684128	NA	-1.01073	NA	NA	-0.512545	NA	-0.587327	NA	-0.342329	NA	-0.479808	-0.973237	-0.463397	-0.523158	-0.381859	-0.261882	-0.400399	-0.299768	-0.272037	-0.376383	-0.140247	-0.294669	-0.150465	-0.270879	-0.698759
C5orf51	NA	-0.74572	-0.894392	NA	NA	NA	-0.271031	-0.718373	-0.328646	-0.835577	NA	-0.50826	-0.864328	-0.834155	NA	NA	-0.218135	-0.668115	NA	-0.674928	-0.559574	-0.252385	-0.294669	-0.692141	-0.478343	-0.788071	-0.191509
C6orf203	-0.89403	-0.810948	NA	-0.989469	-0.798672	-0.585102	NA	NA	-0.891233	NA	NA	NA	NA	NA	NA	NA	NA	NA	NA	NA	NA	NA	NA	NA	NA	NA	NA
C7orf50	-0.0565126	-0.0131445	0.0217523	-0.115463	0.0163906	-0.0888735	-0.437455	-0.404752	-0.535013	-0.305703	-0.13819	-0.297549	-0.118951	0.0844396	-0.134014	0.147462	0.0623252	0.0540148	-0.0135543	-0.21665	NA	NA	NA	NA	NA	NA	-0.289276
C8orf33	-0.556432	NA	-0.999434	NA	-0.520385	NA	-0.707597	-0.624922	-0.613687	-0.609227	-0.213416	-0.334295	-0.0108378	-0.33233	-0.172809	-0.00530218	-0.177939	-0.106449	-0.0633234	-0.180209	NA	NA	NA	NA	NA	NA	-0.464446
C8orf82	-0.735309	-0.695391	-0.575391	-0.905222	-0.740392	-0.693972	-0.758762	-0.835944	-0.759974	-1.05451	NA	NA	-0.489861	-0.606283	-0.397984	-0.528471	-0.0565301	0.0209768	0.0248914	-0.0233889	NA	NA	NA	NA	NA	NA	-0.259682
C9orf64	-0.53981	-0.387965	-0.55846	-0.489463	-0.638843	-0.508383	NA	-0.693635	-0.884762	0.0628616	-0.2086	-0.193636	0.34942	0.364517	0.284356	-0.224156	0.174644	-0.172016	0.13246	-0.076386	-0.194168	0.0584395	-0.522943	-0.315659	-0.408403	-0.308427	0.3389
C9orf78	-0.153758	-0.115852	-0.100419	-0.221506	-0.0233286	-0.151116	-0.0870081	-0.213289	-0.132029	-0.493993	-0.151004	-0.243901	0.35849	0.250775	0.252482	0.0332766	0.119466	0.269765	0.0353606	0.158357	-0.147327	-0.285737	0.470584	0.0525409	-0.106516	0.276565	-0.171393
CA5B	-0.0664304	0.0770534	0.0523943	-0.221506	0.0360879	-0.0133408	-0.444928	-0.971262	-0.623856	-1.36429	NA	NA	-0.707293	-0.343025	-0.409315	-0.245189	0.0365629	0.0113145	0.121338	0.172754	-0.216283	-0.178394	-0.210664	-0.57202	-0.551565	-0.485049	-0.180652
CAB39	0.381073	0.357127	0.318016	0.234533	0.217827	0.0969095	0.263671	0.167977	0.202288	0.602	0.531303	0.62583	0.662987	0.904926	0.96578	0.960298	0.676184	0.718525	0.718562	0.745717	0.465203	0.430039	-0.143692	0.444236	0.315949	0.531923	0.366235
CABLES2	NA	NA	-1.2206	NA	NA	NA	-1.32167	-1.37179	NA	-1.17994	NA	NA	-0.832395	NA	-0.823401	NA	-0.873941	NA	-1.01198	NA	NA	NA	NA	NA	NA	NA	NA
CACTIN	-0.743842	-0.585144	-0.587376	-0.267089	-0.493762	-0.388379	-0.0828317	0.180021	0.207698	-0.77554	-0.385216	-0.69306	-0.505104	-0.231817	-0.432418	-0.216665	-0.142875	-0.120706	0.0492945	-0.0497336	NA	NA	NA	NA	NA	NA	-0.472642
CACYBP	0.864198	0.880804	0.889278	1.10239	0.675078	0.673632	1.2674	1.27439	1.26862	1.35489	1.28379	1.30463	1.29985	1.3197	1.36934	1.10379	0.687523	0.747235	0.558227	0.695407	0.833155	0.75668	0.879719	1.0703	0.964917	1.062	0.724299
CAD	0.485671	0.530209	0.461147	0.484271	0.412782	0.400303	0.730615	0.769798	0.747412	0.891759	0.905389	0.919823	1.33314	1.5321	1.41081	1.31271	0.88437	0.896445	0.690987	1.02775	0.726286	0.862866	0.74451	0.857117	0.866975	0.828908	0.346987
CALCOCO2	NA	NA	NA	NA	NA	NA	-0.858494	NA	NA	NA	NA	NA	-0.485297	-0.973579	-0.268563	-0.330001	-1.31573	-0.237952	NA	-0.39444	-0.332064	-0.277972	-0.365088	-0.481689	-0.30659	-0.53384	0.255376
CALM3	2.41488	2.27345	2.23365	1.47594	1.82601	1.75654	0.279149	0.283725	0.369709	1.56017	1.33849	1.34894	NA	NA	NA	NA	NA	NA	NA	NA	NA	NA	NA	NA	NA	NA	NA
CALR	1.62879	1.53944	1.52881	1.80107	1.41457	1.42729	1.55283	1.59744	1.61098	1.30527	1.34675	1.35804	1.60293	1.37572	1.52133	2.16828	1.36608	1.33876	1.37253	1.17779	1.70575	1.75449	1.86492	1.86492	1.89455	1.93156	0.484988
CALU	-0.0262273	0.0355572	-0.0392784	0.0689523	-0.354907	-0.342246	0.086974	-0.0715263	-0.00631665	-0.0194884	-0.00711349	0.0196635	0.265766	0.251641	0.311868	0.315829	-0.111195	-0.127435	0.00870663	NA	0.123062	-0.104513	0.357529	0.214175	0.237079	0.390721	1.20263
CAMK1D	-0.135697	-0.155435	-0.279574	-0.0585445	-0.285395	-0.202796	-0.75157	-0.927998	-0.895759	NA	NA	NA	-1.2237	-1.25057	-0.72951	NA	-0.141067	-0.246103	-0.25978	-0.136718	-0.389516	-0.394729	-0.299988	-0.687411	-0.629813	-0.616781	0.0200075
CAMK2D	0.184664	0.161322	0.154363	0.00959032	0.0297733	0.0145074	0.430266	0.205968	0.323509	-0.25866	-0.282825	-0.137434	0.471867	0.633398	0.679431	0.388023	0.642883	0.683946	0.715144	0.722015	0.423614	0.175084	0.389892	0.513853	0.565363	0.478423	0.585819
CAMK2G	0.413066	0.40048	0.42226	0.394506	0.30965	0.309188	0.122645	0.0942436	0.147282	0.00112558	-0.218766	-0.0868104	NA	NA	NA	NA	0.461105	NA	NA	NA	-0.162755	0.0443213	-0.726985	-0.495605	-0.221058	-0.307034	1.27969
CAMK4	0.336164	0.40048	0.347	0.257736	0.417927	0.362207	0.169324	0.12848	0.215452	-0.0568464	-0.302835	-0.267656	0.187178	0.0937641	0.0454245	0.60538	0.710241	0.698819	0.549717	0.728594	0.606857	0.416238	0.158166	0.424782	0.413641	0.147175	0.169294
CAMP	-0.319249	-0.533125	-0.473494	-1.2224	-0.412586	-0.306419	NA	NA	NA	NA	NA	NA	NA	-1.03588	-0.752307	-0.396943	-0.773419	-0.618709	-0.57238	-0.700397	NA	NA	NA	NA	NA	NA	-0.879032
CAND1	1.35937	1.29911	1.29172	1.21077	1.16102	1.13817	1.25454	1.17332	1.28222	1.31147	1.19146	1.39048	1.64167	1.85796	1.7287	1.57326	2.0398	2.07972	1.69325	1.97205	0.320625	0.37986	0.776999	0.66652	0.583516	0.628187	0.696814
CANX	1.01578	1.07998	0.993375	0.903921	0.823752	0.846566	0.982273	1.00395	0.990519	0.878792	0.894598	0.99467	1.31698	1.35194	1.44317	1.44884	1.29438	1.28458	1.33724	1.25835	1.12834	1.20943	0.935596	1.10658	1.10958	1.27991	0.741514
CAP1	2.30378	2.43252	2.40697	2.39938	2.59234	2.53667	2.55612	2.00359	2.24421	2.22188	2.16479	2.03869	NA	NA	2.72325	3.04369	4.31554	3.60091	2.92749	3.9269	2.73438	3.35603	3.35603	2.37065	2.68149	2.49565	1.8379
CAPG	0.776656	0.784741	0.748418	0.82844	0.694337	0.652603	0.492366	0.491954	0.635613	0.31494	0.286484	0.34529	0.308967	0.331083	0.670179	0.462206	0.478149	0.412913	0.563905	0.607773	1.08839	1.06569	1.23694	0.820377	0.865715	1.06569	0.769244
CAPN1	1.04694	1.03512	1.03709	1.15504	0.995623	1.05281	0.697037	0.628411	0.805908	0.670077	0.705169	0.583409	0.912701	0.877547	0.956126	0.827015	1.40216	1.14143	1.03724	1.39762	0.362389	0.325085	0.101127	0.0886626	0.00376106	0.0317922	0.64576
CAPN2	0.95438	0.943562	1.00899	0.89991	0.95818	0.920643	0.813676	0.749293	0.935562	0.470804	0.383022	0.429466	0.382507	0.553508	0.493639	0.540509	0.843953	0.963107	0.760109	1.03629	0.857117	0.634729	0.432996	0.703562	0.404902	0.67195	0.37308
CAPN7	-0.417879	-0.514227	-0.378356	-0.322523	-0.661913	-0.869956	-0.836448	NA	-0.933087	NA	NA	NA	-1.23121	-0.540803	-0.152099	1.03965	0.104411	0.185337	0.117892	0.273209	-0.333645	-0.0914961	-0.789719	-0.559939	-0.931541	-0.499437	-0.0723618
CAPNS1	0.805971	0.877738	0.8433	0.678416	0.710583	0.63198	0.585111	0.459396	0.624408	0.760948	0.693913	0.674196	0.908862	0.861244	0.914228	0.70263	0.890877	0.962237	0.643513	0.958241	1.14945	1.23041	1.11272	0.862866	0.870443	0.92954	0.61038
CAPRIN1	-0.219627	-0.193331	-0.107565	-0.458231	-0.163271	-0.318776	0.620427	0.445754	0.419476	0.650705	0.613875	0.691459	1.04239	1.04892	0.944932	1.22696	0.606034	0.40072	0.495693	0.356822	0.110015	-0.469234	0.0899372	0.560688	0.692392	0.783988	-0.00356457
CAPZA1	1.59406	1.69186	1.58019	1.58591	1.49115	1.42729	1.48583	1.5835	1.60432	1.42187	1.42126	1.52889	1.8122	1.5448	1.3859	1.65685	1.47123	1.52839	1.45956	1.49874	1.59576	1.85417	1.78665	1.54951	1.60171	1.48334	1.3298
CAPZA2	0.662811	0.726875	0.719706	0.602505	0.616974	0.572381	0.663545	0.639161	0.725629	0.638977	0.736666	0.874984	0.82981	0.743253	0.746181	0.647581	0.728776	0.751173	0.711388	0.694685	0.963108	0.712813	0.66652	0.800693	0.600182	0.757755	0.953333
CAPZB	1.63621	1.56812	1.56395	1.99498	1.57966	1.49327	1.20973	1.14232	1.04485	0.987377	0.884942	0.941559	NA	1.61779	NA	1.36117	NA	NA	NA	NA	2.04551	2.15425	2.24172	1.75449	1.86492	1.82949	2.45761
CARD11	-0.0765808	-0.209474	-0.135715	-0.0193494	-0.0734068	-0.279552	0.0172346	-0.180545	-0.64486	NA	NA	NA	0.336464	0.363064	0.472469	0.357146	0.405464	0.48166	0.300289	0.40339	0.0115607	0.18973	0.355402	0.230022	0.158877	0.0584395	-0.433087
CARD16	-0.659455	-0.686337	-0.852841	-0.842759	-0.470599	-0.984784	NA	-0.875031	NA	NA	NA	NA	-0.500104	-0.735997	-0.841672	NA	-0.280765	-0.222431	-0.305986	-0.232863	NA	NA	NA	NA	NA	NA	0.0881223
CARD19	-0.242109	-0.19096	-0.265501	NA	NA	-1.10621	-0.891779	-0.657969	-0.895759	NA	-0.939145	NA	-0.239486	-0.0594513	-0.0993213	-0.307797	-0.212795	-0.192537	-0.187034	-0.271155	NA	NA	NA	NA	NA	NA	-0.543851
CARD8	-0.236998	-0.186691	-0.336156	-0.599266	-0.413911	-0.548433	-0.283941	-0.282829	-0.261674	NA	-0.602351	-1.27052	0.101	-0.17703	-0.109472	-0.151597	-0.0486962	-0.100466	-0.0456457	-0.0264376	-0.169905	0.0175211	-0.154181	-0.346137	-0.465736	-0.294669	0.0484824
CARHSP1	0.10945	0.0625239	0.0268189	-0.0537484	0.077271	0.104826	0.166154	0.0470333	0.121798	0.0833201	0.128907	-0.117363	0.560982	0.367477	0.345543	0.304169	-0.180873	0.0382174	-0.585138	0.0859199	-0.844425	-1.16852	-0.900127	-0.519795	-0.59537	-0.206084	0.187051
CARM1	-0.447755	-0.525636	-0.521819	-0.60468	-0.223377	-0.374513	-0.171549	-0.999927	-0.316522	-0.526261	-0.748532	NA	0.417645	0.593476	0.574545	0.225114	0.0131953	0.0291277	-0.104875	0.180137	-0.350487	-0.424925	-0.32998	-0.272037	-0.173673	-0.36172	0.161725
CARMIL2	0.25145	0.205516	0.264065	-0.0300122	0.00355807	0.0419382	0.211899	0.100372	-0.07039	0.30558	-0.028828	-0.145307	0.488114	0.505763	0.550965	0.541377	0.665237	0.534272	0.589819	0.652767	-0.0898611	-0.841685	-0.790981	-0.253069	-0.568673	-0.0914961	0.360242
CARS	0.401939	0.469368	0.45646	0.528982	0.410103	0.462337	0.446114	0.383967	0.419476	0.519966	0.506239	0.415578	NA	NA	NA	NA	NA	NA	NA	NA	NA	NA	NA	NA	NA	NA	NA
CARS2	-0.330314	-0.2712	-0.23195	-0.101185	-0.211097	-0.359142	-0.621995	-0.58168	-0.626598	-0.665409	-0.935244	NA	0.162056	0.433618	0.365787	0.35028	0.24452	0.174447	0.294047	0.136038	-0.221991	-1.01542	-0.617391	-0.258949	-0.426903	-0.392635	-0.687206
CASP1	0.425519	0.433532	0.435686	0.468507	0.561371	0.457252	0.520853	0.270879	0.337325	0.294971	0.272891	0.23801	0.523145	0.282571	0.195327	0.236713	0.616632	0.674614	0.465241	0.640773	0.76092	0.830187	1.09041	0.573008	0.630547	0.68775	0.667666
CASP10	-0.376508	-0.418877	-0.614579	-0.802425	-0.520385	-0.856542	-0.667539	-0.864386	-0.779364	-0.808199	NA	NA	-0.0709477	0.0963559	-0.0369529	-0.10399	0.0543878	0.0254818	-0.0100508	0.148175	-0.167175	-0.608784	-0.366646	-0.381219	-0.294018	-0.390055	0.894629
CASP14	NA	-1.04898	NA	NA	NA	NA	NA	NA	NA	NA	NA	NA	NA	NA	NA	NA	NA	-0.851201	NA	-0.8352	NA	NA	NA	NA	NA	NA	-0.759812
CASP2	NA	-0.989819	NA	NA	NA	NA	NA	-0.950173	NA	-0.79121	-0.925984	-0.831109	0.262895	0.124282	0.218063	0.0455244	-0.268666	-0.231885	-0.332413	-0.181691	NA	NA	NA	NA	NA	NA	-0.469628
CASP3	-1.06875	-1.15576	NA	-0.715626	-0.638843	-0.399535	-0.527802	-0.566099	-0.631851	-0.640844	-0.545696	-0.52287	0.833681	0.814742	0.846303	0.694932	-0.139585	-0.0196858	-0.00814629	0.0703288	-0.336426	0.224383	0.193346	-0.0783747	0.053853	0.0382588	-0.321956
CASP4	-0.618191	-0.560267	-0.539599	-0.328698	-0.299671	-0.331082	-0.354069	-0.400284	-0.53785	-0.711025	-0.502745	-0.410394	-0.0344668	0.00222532	-0.131049	0.0939487	-0.0452138	-0.0107944	-0.130293	0.0488594	-0.0443883	0.000871394	0.131511	0.017186	-0.0653131	0.252589	-0.411198
CASP6	-0.147183	-0.0764123	-0.0392784	-0.0329793	-0.080687	-0.0888735	-0.504119	-0.402525	-0.354939	NA	NA	NA	0.130391	0.00087616	-0.00938209	-0.0659802	-0.144616	-0.0255399	-0.275498	-0.0131757	0.0501609	0.0890451	0.10763	-0.216283	-0.12377	-0.177121	0.238772
CASP7	-1.14107	NA	NA	-0.489463	-0.678431	NA	NA	-0.608847	-0.867867	NA	-1.03431	NA	-0.559153	-0.463974	-0.518048	-0.300248	-0.135461	-0.227588	-1.15901	-0.536849	-0.222279	-0.598035	-0.151488	-0.441267	-0.355279	-0.445033	0.140507
CASP8	-0.204056	-0.292063	-0.211539	-0.0558354	-0.364331	-0.388379	-0.0612934	0.0654241	-0.07039	-0.561251	-0.401345	-0.538626	-0.0680255	-0.153394	0.0199873	-0.204085	-0.0631212	0.0688345	-0.189133	0.0839329	0.20369	-0.200765	0.322377	-0.0139913	-0.420211	0.10847	-0.00526685
CAST	0.969958	0.96593	0.948859	1.14318	0.868151	0.796458	0.930335	0.938097	0.958561	0.778362	0.729342	0.713934	NA	NA	NA	NA	NA	NA	NA	NA	0.889637	0.301695	1.21814	0.977178	0.814364	0.912928	0.96224
CAT	0.626724	0.641742	0.60769	0.681871	0.661932	0.603807	0.518983	0.486004	0.624408	0.129448	0.0697278	0.28078	1.00989	0.657285	0.765326	0.845903	0.865724	0.862305	0.755337	0.74939	0.796304	0.658531	0.798895	0.539023	0.606857	0.597381	NA
CBFB	0.206931	0.320226	0.237046	0.33468	0.548426	0.611158	0.188308	0.0972031	-0.0152355	0.145076	0.103097	0.0172023	0.81602	0.717761	0.731106	NA	0.40131	0.365886	NA	0.317259	0.292995	0.265328	0.259183	0.153861	0.247245	0.161319	0.906665
CBL	0.178939	0.220848	0.204327	0.117388	0.136025	0.0403478	-0.360075	-0.342177	-0.349659	-0.0649166	-0.0915313	-0.278296	0.224743	0.411487	0.409721	0.268838	0.503292	0.397126	0.336689	0.46652	0.124217	0.22271	-0.0271824	-0.127736	-0.0629345	-0.0572407	0.141072
CBLB	NA	NA	-1.26735	NA	NA	NA	NA	-0.887568	-0.613687	-0.724954	-0.117643	NA	0.0721629	-0.0379396	-0.156775	-0.071035	-0.477529	-0.363726	-0.406234	-0.449004	-0.183695	-0.0428533	-0.740943	-0.151143	-0.153949	-0.113751	-0.145307
CBLL1	-0.618191	-0.581714	NA	-0.363888	-0.502466	-0.544569	-0.635612	-0.541777	-0.877054	NA	-1.07569	NA	-0.501155	-0.513052	-0.341215	-0.395557	-0.340329	-0.433452	-0.277689	-0.352573	NA	NA	NA	NA	NA	NA	-0.284678
CBR1	0.885713	0.954082	0.917816	0.855197	0.753838	0.777299	0.694526	0.855539	0.838705	1.02418	0.894598	0.813093	1.05547	0.977132	0.874895	0.303753	0.983273	0.93193	0.826583	0.53983	1.03404	0.978804	0.902378	0.843494	0.81605	0.63852	0.404921
CBR3	0.224933	0.279905	0.269227	0.267516	0.26354	0.16133	0.0482615	0.121736	0.121798	-0.350224	-0.614919	-0.524013	0.750126	0.688503	0.430852	0.233298	0.67812	0.667571	0.237297	0.379231	0.652446	0.571205	0.560688	0.441504	0.514931	0.281793	0.0360464
CBR4	0.00932259	0.0504484	-0.0525302	0.0227936	-0.124439	-0.104861	0.0613772	-0.647289	-0.11234	-0.14786	NA	-0.375325	-0.119887	-0.0580079	-0.209695	-0.178227	0.0668492	0.299697	0.311941	0.184169	-0.176282	-0.699584	-0.28944	-0.298105	-0.379595	-0.491514	-0.715917
CBX1	0.182313	0.224984	0.217587	0.30804	0.210229	0.0483972	0.129547	0.0690823	0.0683858	-0.622311	-0.622246	-1.03125	0.224166	-0.0512033	0.067831	0.389568	0.52564	0.313455	0.694109	0.381098	0.214656	-0.18005	-0.0398631	0.183044	-0.23194	-0.139452	0.357703
CBX3	0.906094	0.949505	0.970405	1.12831	1.0317	0.999036	0.933646	1.02796	0.948013	0.707737	0.670575	0.740249	1.28853	1.13691	1.13604	1.33784	1.0322	1.1316	1.22981	1.13227	1.02765	0.980708	1.15851	1.07654	1.14042	0.790609	0.483163
CBX5	0.500303	0.488276	0.499758	0.443024	0.373954	0.439269	0.356853	0.543983	0.411358	0.168862	0.0715014	0.0836556	1.00729	0.80594	0.858452	0.906916	0.908019	0.794485	0.955873	0.819521	-0.715836	-1.13383	-0.891045	-0.996322	-1.10687	-1.15262	0.858095
CC2D1A	-0.153758	-0.574182	-0.364963	NA	-0.772782	NA	-0.652617	-0.891094	-0.499819	-0.374539	-0.371849	-0.43534	-0.164704	0.046547	0.00427671	-0.347137	-0.221602	-0.353654	-0.408153	-0.287793	-0.461772	-0.773273	-0.252788	-0.558464	-0.476991	-0.56188	-0.531943
CC2D1B	-0.0110641	-0.0828788	-0.0706254	-0.0646584	-0.0680852	-0.205344	0.154448	0.011711	0.0109789	-0.77554	-0.302835	-0.824088	-0.0476491	-0.0346428	0.145048	-0.22742	0.0841084	0.0205838	0.167974	-0.0238062	-0.0313762	0.042554	0.179491	-0.0837564	-0.0705561	-0.0821478	-0.469387
CCAR1	0.550911	0.563543	0.580013	0.591234	0.517729	0.464087	0.504546	0.583397	0.753381	0.411166	0.350695	0.384739	1.25244	0.937249	1.17263	1.15942	0.92959	0.920481	0.881993	0.912846	NA	NA	NA	NA	NA	NA	-0.173228
CCAR2	0.84496	0.870465	0.897235	0.858494	0.95818	0.886859	0.930335	0.983282	1.03298	0.789096	0.693913	0.754238	NA	NA	NA	NA	NA	NA	NA	NA	0.870443	0.974828	0.859004	0.67807	0.822668	0.739538	NA
CCDC115	NA	-0.748524	-0.60975	-0.793572	NA	NA	-1.00464	NA	-1.04855	-0.563847	NA	NA	-0.696694	-0.729458	-0.76371	-0.373792	-1.04346	-0.568754	NA	NA	NA	NA	NA	NA	NA	NA	0.00135321
CCDC12	-0.381776	-0.556774	-0.148835	-0.236032	-0.531099	-0.758403	-0.756536	-0.533519	0.0556705	-0.0451626	-0.272689	-0.270908	-0.0185024	-0.0577313	-0.043324	0.295902	0.0596138	0.117041	0.0934625	0.183009	-0.663447	-0.37997	-0.912041	-0.666334	-0.420752	-0.406197	0.0405685
CCDC124	-0.376508	-0.353609	-0.27674	-0.282063	-0.423139	-0.513843	0.181127	-0.0441275	-0.0386637	-0.0754625	-0.0388284	-0.278296	0.131489	0.523213	0.467321	0.381622	0.0558051	0.192998	-0.0161218	0.220374	-0.459018	-0.096201	0.00568527	0.20369	0.0477207	0.029177	0.215181
CCDC127	-0.697	NA	-0.840423	-0.588291	-1.29903	NA	NA	NA	NA	NA	NA	NA	NA	-0.728047	-0.691966	-0.649809	-0.289	-0.260188	-0.180645	-0.0701094	NA	NA	NA	NA	NA	NA	-0.587564
CCDC134	-0.878697	NA	NA	NA	-0.975386	NA	NA	NA	NA	-0.537393	-0.690849	-0.674897	-0.391159	-0.193106	-0.296596	-0.303282	-0.337891	-0.26058	-0.387081	-0.381959	NA	NA	NA	NA	NA	NA	0.00589361
CCDC137	-0.778066	-0.671027	-0.844427	-1.23212	-0.772782	NA	-0.678142	-0.383002	-0.379224	-0.279112	-0.527521	-0.249255	-0.305919	-0.27391	-0.236551	-0.036941	-0.217606	-0.425074	-0.118757	-0.365838	NA	NA	NA	NA	NA	NA	-0.485511
CCDC186	-0.558721	NA	NA	-0.964242	-0.728512	NA	-0.485356	-0.268209	-0.987132	NA	NA	NA	-1.00458	NA	-0.648557	-0.789252	-0.67735	-0.457148	-0.818226	-0.940374	NA	NA	NA	NA	NA	NA	-1.15871
CCDC22	-0.0743381	-0.0148412	-0.0114052	-0.15982	-0.170721	-0.359142	-0.136928	-0.223743	-0.0465982	-0.296865	-0.483571	-0.193636	0.21558	0.13384	0.150333	0.181964	0.215176	0.150733	-0.0589375	0.21058	0.128608	0.166473	0.165493	0.0135722	0.200469	-0.0789394	-0.0879556
CCDC25	-0.156026	-0.0978154	-0.0770693	-0.105205	-0.290584	-0.262614	-0.291466	-0.231862	-0.393685	-0.58743	-0.373642	-0.416796	0.701073	0.252328	0.263737	0.346769	-0.0341881	-0.0671559	-0.00927751	-0.0269426	-0.295129	-0.155865	-0.114774	-0.455607	-0.337363	-0.319737	-0.335646
CCDC28A	-0.869822	-0.865069	-0.859158	NA	NA	NA	NA	NA	NA	NA	NA	NA	-0.818327	-0.764848	-0.623612	NA	-0.656238	-0.993827	-0.753681	-0.770073	NA	NA	NA	NA	NA	NA	-0.930337
CCDC43	NA	-0.754291	NA	-0.751249	NA	NA	-1.1273	NA	-0.443682	-0.653944	-0.483571	-0.771387	-0.123947	-0.117551	-0.0808254	-0.107479	-0.209149	-0.268468	-0.294631	-0.42007	-0.303393	-0.854609	0.0360569	-0.408705	-0.130293	-0.206507	0.595732
CCDC47	-0.0597677	-0.0547579	-0.127644	-0.630019	-0.47292	-0.306419	0.0424668	0.0449299	-0.0633377	0.0475896	-0.0015422	0.112804	0.431424	0.600579	0.652979	0.58753	0.44788	0.44514	0.423511	0.297563	-0.266876	-0.00921906	-0.010535	-0.0682759	0.206866	0.0620738	0.0749716
CCDC51	NA	NA	NA	NA	-0.999948	NA	-1.19143	NA	-1.02772	-0.601937	-0.743653	-0.645392	-0.287407	-0.0682544	-0.0461901	-0.0492394	-0.223896	-0.47368	-0.244162	-0.302501	NA	NA	NA	NA	NA	NA	9.07278
CCDC58	0.03808	0.17847	0.147647	-0.387194	-0.281722	-0.467877	-0.043256	-0.111705	-0.0676501	-0.0274269	0.0132426	0.0680261	0.546142	0.438308	0.445219	0.24704	0.129982	0.271013	0.240126	0.277761	-0.202516	-0.528525	-0.19755	0.142499	-0.314685	-0.261796	0.0255064
CCDC59	-1.16298	-1.08091	-0.716515	-0.743992	-0.484541	-0.771506	-0.925488	-0.898085	-0.981489	-0.951963	-0.576685	-0.73645	-0.683096	-0.280341	-0.343868	-0.00588293	-0.180123	-0.0692455	0.401118	-0.276158	NA	NA	NA	NA	NA	NA	-0.770122
CCDC6	-0.499548	-0.578639	-0.489878	-0.56896	-0.601608	-0.523905	-0.0585159	-0.213289	-0.172445	0.0385883	-0.0747382	-0.210497	0.18211	0.221225	0.148843	0.00126226	0.248425	0.0991022	-0.321878	-0.338887	-0.0186192	-0.302213	-0.0139913	-0.0739588	-0.051678	-0.0856769	-0.652471
CCDC61	NA	NA	NA	NA	NA	NA	-0.940343	NA	NA	-1.45346	NA	NA	-0.515441	-0.34383	-0.530898	-0.516156	NA	NA	NA	-0.906654	NA	NA	NA	NA	NA	NA	NA
CCDC86	-0.159874	0.0439421	-0.217785	-0.139201	-0.538011	-0.687784	0.186616	0.100372	0.0831932	0.248905	0.133156	0.0386831	-0.00590969	-0.0941446	0.0102955	0.448003	-0.0839488	-0.0145313	0.0869721	-0.0754663	NA	NA	NA	NA	NA	NA	-0.652613
CCDC88B	-0.284249	-0.294405	-0.282981	-0.272986	-0.565894	-0.605938	-0.185953	-0.257642	-0.476119	-0.369115	-0.411101	-0.218596	0.221918	0.152778	0.435769	0.502479	0.449341	0.326367	0.334742	0.360461	0.147175	0.312521	0.371268	0.183981	0.236705	0.213141	-0.082812
CCDC9	NA	NA	-0.581743	-0.447111	-0.641493	NA	-0.572342	-0.678061	-0.859048	-0.842853	-0.44369	-0.936951	-0.395809	-0.305414	-0.0836138	-0.0342508	0.0877288	0.0338815	0.0123575	-0.0550794	-0.0553244	-0.0155962	0.247549	0.119052	0.183981	0.0928019	-0.226048
CCDC90B	-0.907952	-0.258459	-0.852841	-0.833943	-1.43355	-0.315779	NA	NA	NA	NA	NA	NA	-0.896628	-0.577525	-0.510277	0.0770121	0.103719	0.0260579	-0.0286675	0.0807712	-0.0950376	0.264548	0.125327	-0.243011	-0.138718	-0.165567	-0.728555
CCDC91	-0.505897	-0.539301	-0.607723	-0.833943	-0.718122	NA	NA	-0.757088	-0.54256	-0.653944	NA	NA	-0.929731	-0.456734	-0.434986	-0.889672	-0.623328	-0.449302	-0.36547	-0.26132	-0.0675031	-1.03156	-0.310594	-0.313568	-0.201878	-0.276152	-0.438004
CCDC93	-0.089097	0.0143064	-0.18962	-0.110699	-0.354907	-0.272355	-0.333004	-0.444852	-0.529636	NA	NA	0.0710109	-0.118474	0.162198	0.0211998	0.0506557	-0.0421276	0.129349	0.0114393	0.148575	-0.0546906	0.260932	0.21994	-0.194168	-0.0541892	-0.227368	0.0984121
CCDC97	-0.430846	NA	NA	-0.649276	-0.720456	-0.476442	-0.33005	-0.891094	-0.924417	NA	NA	-0.782045	0.000127341	-0.146786	-0.0885277	-0.0488096	-0.461183	-0.372363	-0.369182	-0.268553	-0.160809	-0.775573	0.0382588	-0.227368	-0.155865	-0.25566	0.405851
CCM2	-0.189571	-0.159025	-0.226062	-0.766958	-0.624924	NA	-0.851268	-1.26109	NA	NA	NA	NA	-0.0234058	-0.165541	0.074209	0.0086603	-0.0437165	0.0911527	-0.0486682	0.0205299	-0.168493	-0.00998798	0.0115607	-0.418048	-0.41725	-0.487872	0.0955448
CCNA2	NA	NA	NA	NA	NA	NA	-0.479984	NA	-0.813267	-0.523213	NA	-0.397371	-0.334246	-0.10527	-0.319773	-0.503627	NA	NA	NA	-0.910063	NA	NA	NA	NA	NA	NA	NA
CCNB1	NA	NA	NA	NA	NA	NA	-0.350424	-0.531359	-0.6603	-0.534924	-0.534594	-0.739564	-0.129713	-0.330729	-0.213151	-0.146147	NA	-1.28918	NA	NA	NA	NA	NA	NA	NA	NA	NA
CCNH	-0.720977	-0.440044	-0.575391	-0.268604	-0.875629	-0.714332	-0.552379	-1.13866	-1.16652	-0.675589	NA	-0.827369	-0.267191	-0.15361	-0.206706	-0.305862	-0.305684	-0.457402	-0.514897	-0.412615	NA	NA	NA	NA	NA	NA	-0.479061
CCNK	-0.0201492	-0.163389	-0.244109	-0.149682	-0.34119	-0.304081	-0.267851	-0.0742659	-0.0488905	-0.695346	-0.658556	-0.494992	0.00422681	0.0539618	-0.0596341	0.0801809	-0.023441	-0.0174956	-0.00161746	0.0674195	NA	NA	NA	NA	NA	NA	-0.430436
CCNL1	-0.791821	-0.61503	NA	-0.781832	-0.736549	-0.766137	-0.621995	-1.05389	-0.845333	-0.568746	-0.66984	-0.6576	-0.393339	-0.199211	-0.215199	-0.305785	-0.287433	-0.0440096	-0.304458	-0.321606	NA	NA	NA	NA	NA	NA	-0.193067
CCNL2	NA	NA	NA	NA	NA	NA	-0.919337	-0.842097	-0.826305	NA	NA	-0.859553	-0.415809	-0.34763	-0.21468	-0.331843	-0.475137	-0.816667	-0.430073	-0.419717	NA	NA	NA	NA	NA	NA	0.219777
CCNT1	-0.84916	-1.16523	-0.90397	-0.518695	-1.0341	-0.863127	-0.59661	-0.755292	-0.35703	-0.699865	-1.11192	-0.661545	-0.450064	-0.255599	0.0397567	-0.054719	-0.153895	-0.36094	-0.283651	-0.27672	NA	NA	NA	NA	NA	NA	-0.891229
CCNY	-0.419919	-0.525636	-0.623337	-0.863114	-0.49131	-0.675079	NA	NA	NA	NA	NA	NA	-0.543374	-0.432596	-0.328858	-0.819785	-0.206945	-0.21628	-0.184159	-0.033212	NA	NA	NA	NA	NA	NA	0.0927039
CCR7	-0.251793	-0.153845	-0.31527	-0.590827	-0.551278	-0.251132	-0.527802	-0.780339	-0.944937	-0.342263	-0.192885	-0.424384	-0.520755	-0.473086	-0.52981	-0.0741967	-0.141774	-0.395593	-0.100662	-0.123992	NA	NA	NA	NA	NA	NA	-0.575382
CCS	-0.0288678	0.0545043	0.0750991	0.213875	0.0984142	0.0989532	-0.248387	-0.206165	-0.271054	-0.466582	-0.202196	-0.297549	0.716249	-0.0259932	0.585125	0.948109	0.492658	0.98244	1.39094	0.19649	0.384229	0.281085	0.433796	0.17234	0.133982	0.170732	-0.345945
CCT2	1.43701	1.43017	1.41852	1.37774	1.29293	1.12453	1.8908	1.8102	1.80313	1.83078	1.98291	1.94023	2.70392	2.6139	2.23131	2.11126	1.6097	1.71643	1.57623	1.72881	1.53559	1.49931	1.66491	1.80752	2.06565	1.97261	1.25479
CCT3	1.54319	1.47551	1.45905	1.5025	1.32086	1.26027	1.64189	1.8421	1.93538	1.79232	1.64805	1.70228	1.95272	2.66237	2.60496	2.11126	1.70138	1.56923	1.24686	1.44976	1.60171	1.44006	1.47751	1.81673	1.78665	1.88505	1.09374
CCT4	1.25789	1.22334	1.22939	1.02622	1.11153	1.10244	1.67709	1.66663	1.72415	1.68929	1.60973	1.68982	2.16414	2.48837	2.27787	1.88783	1.50538	1.57594	1.26012	1.4088	1.40772	1.36184	0.909886	1.555	1.57061	1.58189	0.732609
CCT5	1.28201	1.27638	1.32982	1.23917	1.11153	1.09703	1.56579	2.05187	2.01154	1.45879	1.28379	1.39922	2.56942	2.53362	2.34047	2.3463	1.79133	1.91518	1.70421	1.92566	1.52804	1.6391	1.6981	1.58189	1.70575	1.6391	0.727423
CCT6A	1.22243	1.24052	1.17726	1.21572	1.1371	1.11132	1.47711	1.45299	1.37894	1.41325	1.52772	1.30463	1.97266	2.39039	2.07739	1.85343	1.64516	1.64062	1.29883	1.50883	1.6728	2.08208	1.82949	1.87365	1.97261	1.94517	0.902196
CCT7	0.977856	1.00898	1.12324	0.993959	0.970708	0.929999	1.30292	1.22952	1.19433	1.31972	1.39449	1.43575	2.21322	2.33196	2.31137	1.81374	1.58333	1.57594	1.65998	1.76263	1.35739	1.57061	1.42768	1.51789	1.52804	1.49385	1.05982
CCT8	1.35114	1.28615	1.3709	1.31265	1.35187	1.25531	1.75366	1.64544	1.56727	1.80311	1.94263	1.84161	2.8737	2.94829	2.88893	2.66007	1.61621	1.83131	1.61544	1.79569	1.81673	1.93156	1.71472	2.15425	2.27827	2.15425	0.724798
CCZ1B	-1.0858	-0.868306	-0.508501	-0.933836	-0.521873	-0.826267	-0.360075	-0.336242	-0.631851	-0.751066	-0.828699	-0.466824	NA	NA	NA	NA	NA	NA	NA	NA	NA	NA	NA	NA	NA	NA	NA
CD101	NA	-1.48409	NA	-0.828141	NA	-0.925666	NA	NA	NA	NA	NA	NA	-0.391557	-0.768805	-0.786833	-0.546596	-0.291396	-0.56812	-0.48827	-0.237629	NA	NA	NA	NA	NA	NA	-0.466131
CD2	0.357371	0.23984	0.320665	0.465083	0.384922	0.36895	0.43865	0.505462	0.395533	0.349737	0.37058	0.397414	-0.0983282	0.121466	0.264208	0.406734	-0.107691	0.184199	0.105001	-0.0207681	-0.113751	-0.458485	-0.109839	0.0997043	0.0542535	0.234506	0.830083
CD226	NA	NA	-0.87123	-1.04873	NA	-0.786326	-0.44686	-0.55662	-0.626598	-0.313908	-0.311316	-0.117363	-0.450438	-0.118813	-0.457315	-0.1248	-0.670074	-0.482509	-0.709501	-0.44648	NA	NA	NA	NA	NA	NA	NA
CD247	0.724118	0.776209	0.758279	0.622866	0.594696	0.582248	0.121493	0.0325556	0.0348626	0.0859833	0.166818	0.0895285	NA	NA	NA	NA	NA	NA	NA	NA	0.657423	0.92954	0.649066	-0.10897	-0.226244	-0.21773	0.525124
CD27	-0.222989	-0.201229	-0.143184	-0.381205	-0.211097	-0.115913	-0.733206	-0.875031	-0.950407	-0.930946	-0.709607	-0.938769	0.186843	-0.127586	-0.0789992	-0.133331	0.0215005	-0.0718616	-0.0317551	-0.016215	-0.138718	-0.408403	-0.776761	0.0322896	-0.365088	-0.0660003	0.668119
CD28	-0.336271	-0.2712	-0.367722	-0.743992	-0.192368	-0.366302	-0.761353	-0.846055	-0.466048	-1.00916	-0.760757	-0.806022	-0.158554	0.220215	0.362882	0.105292	-0.124292	-0.0408954	-0.0186771	-0.0935888	NA	NA	NA	NA	NA	NA	-0.0549421
CD2AP	0.248568	0.353335	0.306741	0.379273	0.320744	0.299423	0.381192	0.434363	0.445753	0.354913	0.0668638	0.197382	0.456669	0.515348	0.588437	0.575262	0.848319	0.771373	0.802184	0.867253	0.800693	0.850164	0.876612	0.754367	0.80711	0.742097	0.168981
CD2BP2	-0.0960896	-0.211468	-0.246656	-0.153617	-0.157977	-0.212974	-0.274716	-0.089493	-0.0235696	-0.287779	-0.213416	-0.184456	-0.0945923	-0.211081	-0.144467	0.155592	0.150864	0.0496971	0.164373	0.104724	-0.387747	-0.0271824	-1.22518	-0.245315	-0.0267219	-0.341217	-0.138112
CD300A	-0.836334	NA	NA	-0.929557	-0.769812	-0.796562	NA	NA	NA	NA	NA	NA	-0.447476	-0.734631	-0.504571	-1.03223	NA	NA	-0.817762	NA	-0.541379	-0.408705	0.100715	-0.130816	-0.00377218	-0.106516	NA
CD37	-0.810222	-0.490982	-0.517817	-0.507671	-0.475544	-0.473175	-0.558454	-0.468496	-0.629331	-0.90136	NA	-1.11368	-0.280309	-0.309477	-0.0983273	-0.0119671	-0.244515	-0.286478	-0.113444	-0.28328	NA	NA	NA	NA	NA	NA	-0.879419
CD38	-0.906775	-1.06378	-0.877057	-0.65212	-0.644092	-0.554942	-0.680931	-0.344924	-0.479982	-0.723593	-0.971167	-0.56747	0.632758	0.504932	0.692593	0.853613	-0.0352843	-0.0828678	0.174979	-0.070697	-0.545586	-0.406744	-0.909958	-0.494861	-0.495912	-0.589629	-0.753349
CD3D	0.434322	0.407348	0.447951	0.286477	0.421529	0.41208	0.107687	0.140687	0.0446633	0.233467	0.104863	0.101161	0.326358	0.43574	0.546401	0.11385	0.554662	0.65311	0.729657	0.652392	0.619456	0.776999	0.696767	-0.010535	0.233763	-0.00712842	0.372667
CD3E	0.708245	0.678214	0.733129	0.727042	0.716614	0.611158	0.499822	0.484161	0.462669	0.185092	0.221879	0.263642	0.787355	0.753477	0.755037	0.574555	1.12317	1.12535	1.13309	1.18642	0.476715	0.670165	0.633069	0.130936	0.184418	-0.00116466	0.872971
CD3EAP	-0.562954	-0.377102	-0.364963	-0.337194	-0.390667	-0.342246	-0.234293	-0.168386	-0.0131695	-0.1685	-0.106132	-0.0467913	NA	NA	NA	NA	NA	NA	NA	NA	NA	NA	NA	NA	NA	NA	0.122039
CD3G	0.193801	0.0697636	0.198464	-0.101185	0.146793	0.189911	-0.962108	-0.413726	-0.733126	-1.14373	-0.840496	NA	0.468469	0.382901	0.489446	0.53032	0.731108	0.775841	0.748733	0.71401	0.059375	0.0200105	0.363189	-0.249526	-0.55101	-0.550589	0.120659
CD4	0.359505	0.300843	0.30439	0.412654	0.377608	0.428105	0.169324	0.212867	0.279669	-0.0106516	-0.0146231	-0.0102226	0.639499	0.747109	0.724369	0.392612	0.739012	0.895757	0.812412	0.832138	-0.535721	-0.067216	-0.307034	-0.693052	-0.908084	-0.932027	-0.00830096
CD40LG	NA	NA	NA	NA	NA	NA	-0.362694	-0.576666	-0.704807	-0.411242	-0.432547	-0.408786	-0.791012	NA	-0.8769	-0.10956	NA	-0.805116	NA	NA	-0.508087	-0.040991	-0.583062	0.291529	0.16736	0.163348	NA
CD44	0.450482	0.526723	0.476539	0.607289	0.66675	0.522288	0.443363	0.37171	0.348325	0.36794	0.37794	0.423875	0.821044	0.748603	0.791513	0.926939	0.902547	1.08657	1.1392	0.949168	0.828908	0.91142	1.10658	1.13608	1.07893	1.18316	0.775741
CD46	-0.228628	-0.256542	-0.399556	-0.455542	-0.246406	-0.374513	-0.457424	-0.324055	-0.382609	-1.24499	-0.99277	-0.75531	NA	NA	-0.345775	0.115084	0.035566	-0.0961011	-0.0220692	0.0721342	NA	NA	NA	NA	NA	NA	-0.237143
CD47	0.610292	0.366776	0.389468	-0.130286	0.215709	0.0304623	0.540202	0.34402	0.905666	0.926624	0.53383	0.841785	0.0876735	0.0273426	-0.174232	0.669814	0.619435	0.743484	1.06468	0.6475	0.275488	0.357978	0.228891	0.32839	-0.181976	0.219258	0.12609
CD48	0.538063	0.563543	0.502839	0.65346	0.52562	0.537257	0.548834	0.541359	0.572289	0.460878	0.37794	0.447942	0.44206	0.441606	0.52364	0.567135	0.60013	0.725993	0.763036	0.664821	-0.273917	-0.256299	-0.179068	-0.131468	-0.052474	-0.226885	0.191715
CD5	0.84039	0.83918	0.819871	1.02105	0.87799	0.833707	0.440393	0.428692	0.442225	0.330439	0.290021	0.359678	0.799236	0.763553	0.9234	0.907916	0.927191	0.854934	0.964057	0.877682	0.58836	0.399365	0.812912	0.39411	0.345579	0.658531	-0.0804507
CD55	-0.0229659	-0.175894	-0.192137	0.213875	-0.0942701	-0.0511321	-0.11465	-0.16278	-0.248612	-0.581949	-0.402794	-0.955205	0.0273426	-0.0258211	0.0521654	0.148194	-0.364369	-0.00722552	-0.0913662	-0.0883374	NA	NA	NA	NA	NA	NA	-0.32479
CD58	-0.773784	-0.9433	NA	NA	-0.915645	-0.896556	NA	NA	NA	NA	NA	-0.926707	-0.624205	-0.679733	-0.596052	-0.494842	NA	NA	NA	-0.915785	NA	NA	NA	NA	NA	NA	-0.928991
CD59	0.126321	0.168335	0.170678	0.344733	0.217827	0.320737	0.0938352	0.0256258	0.0877636	-0.0785991	-0.167379	-0.154288	-0.0259238	0.150197	-0.0274378	0.558234	0.48479	0.269108	0.374367	0.38812	NA	NA	NA	NA	NA	NA	0.00271441
CD6	0.624121	0.668033	0.639861	0.730259	0.654071	0.640851	0.475082	0.30258	0.438767	0.236571	0.265375	0.319107	0.200084	0.206235	0.274348	0.588373	0.512362	0.746164	0.669625	0.730507	-0.521746	-0.208639	-0.268733	-0.317298	-0.38723	0.0356052	-0.243962
CD63	NA	NA	NA	-0.909738	NA	-0.863127	-0.693711	NA	NA	-0.81365	-0.83429	-0.666915	-0.421374	-0.470443	-0.464727	-0.652192	-1.22062	NA	NA	NA	NA	NA	NA	NA	NA	NA	NA
CD69	NA	NA	NA	NA	NA	NA	-0.590736	-0.598153	-0.842486	NA	-1.13988	-1.34044	-1.12353	-0.985973	NA	NA	NA	NA	NA	-0.569655	-1.20857	-0.740943	-0.0871455	0.567352	-0.00614986	0.106509	NA
CD7	-0.0288678	0.00548717	-0.137312	0.425087	-0.338151	-0.315779	-0.278399	-0.233781	-0.0633377	-0.406427	-0.736852	-0.318358	0.188472	0.163089	0.0428785	0.0695932	0.198678	0.127736	0.311703	0.232062	0.216995	0.456912	0.395955	0.278012	0.395955	0.253887	0.739835
CD70	NA	NA	NA	NA	NA	NA	-1.01364	-0.987516	-1.09309	NA	-1.12227	NA	NA	NA	-0.0266954	-0.476182	NA	NA	NA	NA	NA	NA	NA	NA	NA	NA	NA
CD74	-0.357535	-0.286848	-0.448429	-0.223799	-0.395286	-0.352786	0.120494	0.212867	0.312534	0.348138	0.25712	0.435434	0.279045	0.421835	0.501912	0.718618	0.166273	-0.0572184	0.162281	0.0751628	-0.00614986	0.0346484	0.135533	0.320072	0.291529	0.280044	0.0237577
CD81	-0.222989	-0.0703714	-0.153135	-0.820985	-1.0318	-0.564371	-0.334707	0.222287	0.290818	0.0100626	-0.00711349	0.151107	-0.0299248	0.091892	0.087617	0.254049	-0.616548	-0.150345	0.09014	-0.17142	NA	NA	NA	NA	NA	NA	-0.296142
CD82	-0.485176	-0.473969	-0.478548	-1.04688	-0.633166	NA	-0.574402	NA	-0.810619	-0.279112	-0.165089	-0.213581	-0.719398	-0.755966	-0.577618	-0.688513	-0.64965	-0.70179	-0.311728	-0.512826	-0.546108	-0.906552	-0.392635	-0.0167139	-0.546977	-0.120731	NA
CD84	NA	-0.550128	NA	NA	-0.592941	-0.916405	-0.624206	NA	NA	NA	-0.421833	NA	-0.628125	-0.134869	-0.439771	-0.338894	-0.117067	-0.383564	-0.540882	-0.599389	-0.565721	-0.379089	-0.461547	-0.40909	-0.781049	-0.406744	0.550145
CD96	0.0550715	-0.217175	-0.60975	-0.501339	-0.316418	NA	NA	NA	NA	NA	NA	NA	-0.0417929	-0.323137	-0.0570711	-0.0860189	-0.557815	-0.527189	-0.40986	-0.650991	NA	NA	NA	NA	NA	NA	NA
CD97	0.0169504	0.00979049	0.0852737	-0.0610959	-0.0470205	-0.101846	0.347788	0.114408	0.356912	-0.220583	-0.0565897	-0.20067	NA	NA	NA	NA	NA	NA	NA	NA	NA	NA	NA	NA	NA	NA	NA
CD99	0.114792	0.195041	0.137976	-0.0662104	0.352701	0.206102	-0.510246	-0.484884	-0.636112	-0.226389	-0.205873	-0.310337	0.114305	NA	0.205258	0.587017	0.21342	0.528747	0.506667	0.516778	0.35895	0.00234383	0.476715	0.105824	0.107051	0.317062	-0.224075
CDC123	NA	NA	NA	NA	NA	NA	-0.582884	-0.757088	-1.00602	-0.319278	-0.498396	-0.366087	0.049603	-0.110873	-0.233472	0.0048524	NA	-0.79882	-0.664981	-0.568725	-1.06747	-0.390055	-0.563204	-0.353692	-0.461547	-0.471623	NA
CDC16	-0.909798	-0.778382	NA	-0.916769	-0.825559	-0.833208	-1.04761	-0.553007	-0.521149	-0.202102	-0.322697	-0.299833	0.201504	0.114384	0.238245	0.106606	-0.195429	-0.169439	-0.394347	-0.118202	-1.12478	-0.465837	-0.819471	-0.448407	-0.397039	-0.416024	-0.761472
CDC20	NA	NA	NA	NA	NA	NA	-0.777864	-0.891094	-0.871692	-1.11099	-0.515493	-0.441469	-0.555032	-0.468382	-0.411162	-0.129703	-1.0027	NA	NA	NA	NA	NA	NA	NA	NA	NA	NA
CDC23	-0.447755	-1.02144	-0.545546	-0.814393	-0.504678	-0.582104	-0.625914	-0.507856	-0.720162	-0.528606	-0.448348	-0.425739	-0.0707365	-0.0605947	0.0404284	-0.175808	-0.302306	-0.264863	-0.384482	-0.240588	NA	NA	NA	NA	NA	NA	-0.480092
CDC26	NA	NA	NA	NA	NA	NA	NA	NA	NA	NA	NA	NA	-0.0506966	-0.210711	-0.411433	-0.866715	-0.609988	-0.576933	-0.617151	-0.706868	NA	NA	NA	NA	NA	NA	NA
CDC27	-0.903072	-0.895584	-0.53668	-0.721261	-1.23882	-1.15498	NA	NA	-0.76654	0.00541859	-0.13022	-0.241569	0.35703	0.278396	0.28393	0.13554	-0.126434	-0.0882406	NA	0.116293	NA	NA	NA	NA	NA	NA	-0.691058
CDC37	0.57161	0.617852	0.643479	0.708505	0.644143	0.687284	0.700967	0.602488	0.606964	0.615275	0.569479	0.633706	0.92879	NA	NA	NA	NA	NA	NA	NA	0.959245	0.896293	1.07654	0.914671	1.05037	0.972843	0.593476
CDC40	-0.0417314	0.074627	-0.00953631	0.152058	-0.228974	-0.0937773	-0.163944	-0.16278	-0.236265	-0.322538	-0.187578	-0.0467913	0.162306	0.233786	0.269126	0.318049	0.348496	0.388774	0.375904	0.442508	NA	NA	NA	NA	NA	NA	0.0578662
CDC42	0.938869	0.927485	0.909977	1.55874	1.18328	1.56939	1.19249	1.29023	1.29746	0.982628	1.10509	0.963162	1.0472	1.13798	NA	NA	NA	1.47362	NA	NA	0.539023	0.441504	0.357012	0.463301	0.576881	0.604699	1.32605
CDC42SE2	-0.212783	-0.123534	-0.143184	-0.468104	-0.196564	-0.153908	-0.306495	-0.724661	-0.511769	-0.331484	-0.231202	-0.130343	0.0447402	0.107345	0.0853382	0.091392	-0.0776229	-0.0496101	0.00324887	-0.141076	NA	NA	NA	NA	NA	NA	-0.253164
CDC45	NA	NA	NA	NA	NA	NA	-1.19143	NA	NA	NA	NA	-0.779307	-0.0133369	-0.077698	-0.0606279	0.0111715	NA	NA	-0.84379	NA	NA	NA	NA	NA	NA	NA	NA
CDC5L	0.506884	0.495312	0.480015	0.629821	0.541756	0.457252	0.697037	0.759443	0.812046	0.550378	0.418447	0.493489	0.635208	0.782719	0.879755	0.786542	0.900059	0.837569	0.918515	0.871645	NA	NA	NA	NA	NA	NA	0.203274
CDC73	-0.413925	-0.357495	-0.268503	-0.242894	-0.17822	-0.282852	-0.0848013	-0.0876093	0.136603	0.346395	0.272891	0.129159	0.3965	0.338697	0.325691	0.458476	0.354042	0.533261	0.449234	0.446759	NA	NA	NA	NA	NA	NA	0.269065
CDCA5	NA	NA	NA	NA	NA	NA	NA	NA	NA	NA	NA	-0.973517	-0.204835	-0.138427	-0.129471	-0.217459	NA	NA	NA	NA	NA	NA	NA	NA	NA	NA	NA
CDIPT	-0.388967	NA	-0.327357	0.0668645	-0.226555	-0.0647908	-0.417738	NA	-0.420071	-0.0075755	-0.0850104	-0.251646	-0.26901	-0.236455	-0.142639	0.117038	0.365189	0.325112	0.359949	0.417132	-0.110781	-0.702451	-0.445927	-0.61211	-1.11021	-0.720631	-0.0102838
CDK1	-1.16102	NA	NA	NA	NA	NA	0.22042	0.24813	0.164165	0.182497	0.00534505	0.359678	0.694719	0.902593	0.824086	0.80291	-0.494399	-0.452514	NA	-0.568216	NA	NA	NA	NA	NA	NA	NA
CDK11B	0.300434	0.372887	0.350098	0.252798	0.26354	0.503188	0.17925	0.0858468	0.0877636	0.236571	-0.028828	-0.137434	0.719957	0.615845	0.640016	0.714593	0.714606	0.706804	0.885066	0.771854	NA	NA	NA	NA	NA	NA	0.376436
CDK12	NA	-0.528146	-0.676674	-1.06551	-0.674061	-0.502536	-0.11465	-0.483195	-0.699886	-0.331484	-0.185263	-0.222304	0.604082	0.698768	0.645651	0.676005	0.43051	0.522697	0.504708	0.509422	NA	NA	NA	NA	NA	NA	0.00886991
CDK13	-0.582238	-0.564356	-0.604102	NA	NA	NA	NA	NA	NA	NA	NA	NA	0.133264	-0.136659	0.0769573	-0.134106	-0.067982	-0.118797	-0.12565	-0.230979	NA	NA	NA	NA	NA	NA	-0.139744
CDK2	-0.519039	-0.78302	-1.19529	-0.333918	NA	NA	0.0585163	0.0470333	0.0916042	0.0205036	-0.494984	-0.0791276	0.732716	0.796085	0.855519	0.60538	-0.0484386	-0.417152	0.13448	-0.290014	NA	NA	NA	NA	NA	NA	-0.151243
CDK4	-1.39858	-0.855317	NA	-0.916769	-0.515876	NA	-0.700891	-0.966736	-0.682831	-1.10311	-0.336848	-0.489282	-0.261651	-0.203055	-0.0377808	-0.0850466	-0.646249	-0.773404	-0.720797	-0.748533	-0.597578	-1.17107	-1.01542	-0.37997	-0.457295	-0.134069	-0.266233
CDK5	-0.718094	-0.667255	NA	-1.01073	-1.1691	-1.10416	-0.632678	NA	-0.604229	-0.344829	-1.10522	-0.497945	0.223415	0.106506	0.117346	-0.220812	-0.209558	-0.284644	-0.175154	-0.359365	-0.480652	-0.535231	-0.221525	-0.593214	-0.841685	-0.530775	0.668656
CDK5RAP1	NA	NA	-1.28039	NA	NA	NA	-1.17896	-0.858492	-0.642094	NA	NA	NA	-0.180863	-0.293949	-0.461761	0.123528	NA	-1.02547	-0.714749	-1.03183	NA	NA	NA	NA	NA	NA	NA
CDK5RAP2	NA	NA	NA	NA	NA	NA	NA	NA	NA	NA	NA	NA	-0.56879	-0.438457	-0.127898	-0.151336	NA	-1.04336	NA	-1.41138	NA	NA	NA	NA	NA	NA	NA
CDK5RAP3	0.200458	0.23712	0.184836	0.306129	0.11232	0.200308	0.0585163	0.167977	0.0897843	0.0987014	0.236431	0.0355157	0.407792	0.423486	0.439999	0.506596	0.72727	0.773701	0.924623	0.777048	0.439155	0.502979	0.345579	0.227117	0.365693	0.202493	0.197566
CDK6	0.332259	0.279905	0.271699	0.528982	0.336331	0.243502	0.322334	0.341837	0.448606	0.446508	0.265375	0.452106	0.215837	-0.0198234	-0.120084	0.205551	0.0407046	-0.332575	-0.40912	-0.156674	0.089642	0.12803	-0.0894612	0.220336	0.325848	0.19706	0.22229
CDK7	-0.551212	-0.780641	-0.9242	-0.791616	-0.716677	-0.95592	-0.267851	-0.422759	-0.267423	NA	NA	-0.133411	0.000918015	0.033842	0.0439887	-0.0359055	0.540504	1.31314	1.59652	-0.380318	NA	NA	NA	NA	NA	NA	-0.208481
CDK9	-0.343604	-0.337776	-0.299924	-0.690852	-0.448421	-0.567505	-0.415939	-0.558956	-0.604229	-0.394416	-0.277911	-0.517002	-0.17086	0.324364	0.378829	0.104413	0.083272	0.100961	-0.0756066	-0.0353704	NA	NA	NA	NA	NA	NA	0.0083942
CDKAL1	NA	NA	NA	NA	NA	NA	-0.817435	-0.602262	-0.515361	-0.704279	-1.29102	-0.514617	0.121471	0.261781	0.413445	0.194059	-0.455052	-0.236493	-0.331318	-0.433274	NA	NA	NA	NA	NA	NA	-0.957057
CDKN1B	0.307081	0.39479	0.493522	0.229013	0.22056	0.302164	-1.00011	-0.94489	-0.476119	-0.0937811	-0.19674	-0.0885705	-0.735084	-0.610089	-0.423807	-0.165999	0.327739	0.326178	0.249933	0.304004	0.478423	0.0557377	0.511615	-0.377487	-0.093273	-0.231592	0.18643
CDKN2AIP	0.0522056	0.154224	0.0124401	0.0971502	0.172388	-0.061222	-0.179279	0.0793251	0.00457557	0.292463	0.114267	0.0649018	0.312279	0.368836	0.427727	0.402011	0.709808	0.619365	0.760509	0.641765	-0.11745	0.109802	0.171036	-0.32674	-0.287652	-0.393657	0.340216
CDR2	NA	NA	-0.885623	NA	NA	NA	NA	NA	NA	NA	NA	NA	NA	-0.869433	-0.770962	-0.733143	-0.921524	-0.648551	NA	-0.580099	NA	NA	NA	NA	NA	NA	NA
CDS2	-0.089097	-0.0891796	-0.18962	0.00959032	0.0297733	0.0642806	-0.199476	-0.366003	-0.074472	-0.0296316	-0.233393	-0.364293	-0.58103	-0.334549	-0.376902	-0.0476097	0.320666	0.389063	0.510316	0.41633	-0.363917	-0.531766	-0.831305	-0.391665	-0.531482	-0.427105	-0.192938
CDV3	1.02268	0.970886	0.939177	0.838087	0.861661	0.836404	0.57511	0.505462	0.513313	0.607611	0.597412	0.574486	0.83864	0.746587	0.825766	0.952777	0.842782	0.74032	0.805296	0.840145	0.616765	0.413641	0.906684	0.760101	0.882713	0.873721	1.13344
CDYL	-1.01771	-0.684128	-0.949922	NA	-0.715218	NA	-0.936078	NA	NA	NA	NA	NA	-0.366081	-0.189935	-0.0895995	-0.339577	-0.324354	-0.383277	-0.288323	-0.323473	NA	NA	NA	NA	NA	NA	-0.0790077
CEACAM1	NA	NA	NA	NA	NA	NA	-0.35237	-0.891094	NA	NA	NA	NA	-0.774171	-0.674249	-0.569003	-0.493424	NA	NA	-1.20065	-1.28786	NA	NA	NA	NA	NA	NA	NA
CEBPG	NA	-0.876199	NA	NA	NA	NA	NA	NA	NA	NA	NA	NA	NA	NA	NA	NA	NA	NA	NA	NA	NA	NA	NA	NA	NA	NA	NA
CEBPZ	-0.0597677	-0.161404	0.0247491	-0.491692	-0.423139	-0.542454	-0.0612934	-0.102666	-0.000949028	0.0501027	0.0952579	0.188323	0.479863	0.626473	0.641797	0.506269	0.445819	0.47646	0.524321	0.469448	NA	NA	NA	NA	NA	NA	-0.489749
CELF1	-0.522958	-0.533125	-0.712003	-0.27739	-0.410922	-0.383314	-0.242703	-0.206165	-0.215575	-0.265169	-0.205873	-0.240242	0.591304	0.631578	0.531379	0.407333	0.30647	0.215121	0.290816	0.0935447	-0.369144	-0.86176	-0.203028	-0.0470689	-0.794128	-0.102352	0.366452
CELF2	0.561007	0.591716	0.576577	0.618801	0.571777	0.593855	0.624865	0.611576	0.577338	0.215131	0.251847	0.283646	1.1602	1.16093	1.25491	1.20536	1.04595	1.02939	1.03418	0.999121	0.412391	0.390721	0.281793	0.345579	0.318546	0.288058	0.792868
CEMIP2	-1.17376	-1.08091	NA	-0.518695	NA	-0.191073	-0.957192	NA	NA	NA	NA	NA	0.476825	0.458045	0.519677	0.388272	0.070055	0.0148231	-0.0889038	-0.258802	-0.431005	-0.112327	-0.11257	-0.0911253	-0.308427	-0.0712459	-0.999967
CENPA	-0.751933	NA	NA	NA	NA	NA	-1.11571	NA	NA	NA	NA	NA	NA	NA	NA	NA	NA	NA	NA	NA	NA	NA	NA	NA	NA	NA	-0.66562
CENPB	-0.796589	-0.444612	-0.701783	-0.730643	-0.550167	-0.417788	-1.01812	-0.997096	-1.00953	NA	NA	-1.03125	-0.140249	-0.308602	-0.911074	-0.266101	-0.213616	0.114408	-0.088117	0.108104	NA	NA	NA	NA	NA	NA	-0.739921
CENPC	NA	-0.69889	NA	-0.487683	-0.390667	-0.510022	-0.92917	-0.8837	-0.591117	-0.622311	-1.06078	-1.08233	0.11862	0.162843	0.265552	0.202448	0.373111	0.345795	0.538818	0.421417	NA	NA	NA	NA	NA	NA	NA
CENPV	-0.219627	-0.0788886	-0.312888	0.362738	-0.118929	-0.168908	-0.212147	-0.308803	-0.374694	-0.262206	-0.324946	-0.167291	0.117358	NA	0.142042	0.12005	0.31467	NA	0.344365	0.409256	NA	NA	NA	NA	NA	NA	0.0589289
CEP120	NA	NA	-0.741099	NA	NA	NA	NA	NA	-0.817742	NA	NA	NA	-0.889132	-0.50094	-0.252023	-0.850877	0.049346	0.0177565	0.108861	-0.030063	NA	NA	NA	NA	NA	NA	-0.151139
CEP128	-0.877118	-1.03939	NA	-0.929557	NA	NA	NA	NA	NA	NA	NA	NA	0.127964	0.0453774	-0.266842	-0.304988	-0.566405	-0.303405	0.0284219	-0.235373	NA	NA	NA	NA	NA	NA	NA
CEP135	-0.700392	-0.74572	-0.476397	-0.704383	-0.592941	-0.440103	-0.746857	NA	-0.839739	-0.305703	-1.00617	-0.544999	0.222647	0.142051	0.0912481	-0.0374168	0.737098	0.557455	0.715786	0.600578	NA	NA	NA	NA	NA	NA	-0.728339
CEP170	NA	-0.433527	-1.05898	-0.476242	-0.757179	NA	-1.5818	NA	-1.13825	NA	NA	NA	0.0169364	0.125686	0.127915	0.00591321	0.0775804	0.130773	0.0345853	-0.183776	-0.531766	-0.339015	-0.259116	-0.68383	-0.540713	-0.635537	-0.13566
CEP250	-0.84538	-0.957458	-0.360124	-0.91953	NA	-1.14088	-0.925488	NA	NA	-0.17705	NA	NA	-0.00290872	-0.0660296	-0.0192843	0.143962	0.237457	0.167262	0.383025	0.248154	NA	NA	NA	NA	NA	NA	-0.726269
CEP41	-0.861748	-0.721104	-1.00395	-0.583495	-1.12618	-0.845386	-0.836448	-0.904066	NA	NA	NA	NA	-1.1248	-0.599515	-0.437685	-0.429108	-0.317766	-0.647427	-0.319004	0.0228207	NA	NA	NA	NA	NA	NA	0.388483
CERS2	-0.611776	-0.778382	-1.25726	-1.01281	-0.848559	NA	-0.62813	-0.823841	-0.273733	-0.277041	-0.423899	-0.53516	-0.13057	-0.0551424	0.0789548	-0.0673847	-0.289814	-0.256752	-0.267153	-0.379133	NA	NA	NA	NA	NA	NA	-0.790933
CETN2	-0.0110641	0.0143064	0.0247491	-0.324968	-0.211097	-0.138946	-0.775832	-0.298011	-0.277254	-0.816467	NA	-0.822698	-0.542464	-0.342603	-0.413115	-0.603125	0.162869	0.230507	0.352912	0.261084	NA	NA	NA	NA	NA	NA	0.0386732
CETN3	NA	NA	-0.827918	NA	-0.902551	-0.863127	NA	NA	NA	NA	-0.877348	-0.978754	-0.204059	-0.424719	-0.54459	-0.241878	-0.255075	-0.347759	-0.289896	-0.399506	NA	NA	NA	NA	NA	NA	-0.670228
CFAP20	-0.0982428	-0.0547579	-0.104985	-0.406378	0.14292	-0.0535808	-0.473656	-0.393544	-0.374694	-0.900536	-0.483571	-0.538626	0.0475141	0.159577	0.166551	0.196916	0.356108	1.25993	0.214829	0.251322	NA	NA	NA	NA	NA	NA	-0.134538
CFAP298	-0.443765	NA	-0.327357	-0.146528	NA	NA	-0.183071	0.00132507	0.411358	-0.195598	NA	-0.424384	-0.182334	-0.202825	-0.187886	-0.483228	-0.397245	-0.335131	-0.464561	-0.438237	-0.34938	-0.57286	-0.929008	-0.359446	-0.244871	-0.172735	-0.174366
CFAP36	NA	-0.895584	-0.741099	NA	NA	NA	-1.13194	NA	NA	NA	NA	NA	-0.77395	-0.63836	-0.583452	NA	-0.514837	-0.501736	-0.459566	-0.38129	-0.465736	-1.0529	-0.367883	-0.579509	-0.541379	-0.603434	-0.86619
CFDP1	-0.46794	-0.919663	-0.701783	-0.302886	NA	-0.701795	-1.00871	-0.887568	NA	NA	-0.363985	NA	0.103874	0.016855	0.203979	-0.379317	-0.217882	-0.217579	-0.259663	-0.282953	NA	NA	NA	NA	NA	NA	-0.629631
CFL1	2.91615	2.94387	3.02857	2.79855	3.29122	2.88725	3.01772	2.94919	3.90124	2.8396	2.89862	2.70829	3.98426	3.70008	3.54244	4.10233	5.93286	3.71156	5.49258	4.47375	3.47994	2.87235	3.80417	2.93448	3.2565	2.772	2.66362
CFL2	NA	NA	NA	NA	NA	NA	-0.940343	NA	NA	NA	NA	NA	NA	-0.590104	NA	0.314949	-0.429383	-0.43319	NA	-0.516528	NA	NA	NA	NA	NA	NA	2.02278
CGAS	NA	NA	-1.50129	NA	NA	-1.32159	-0.8079	-0.579752	-0.46357	-1.07186	NA	NA	0.215398	0.341168	0.198559	0.278293	NA	NA	-1.05688	-0.853629	NA	NA	NA	NA	NA	NA	NA
CGGBP1	0.396785	0.437053	0.360485	0.261957	0.176375	0.0773141	0.309182	0.259103	0.206278	0.00541859	-0.0146231	0.0236168	0.518371	0.53673	0.560197	0.621939	0.873357	0.795807	0.889986	0.869903	NA	NA	NA	NA	NA	NA	0.21808
CHAF1B	NA	NA	NA	NA	NA	NA	-0.683173	-0.814732	-0.716234	-0.547223	-0.587791	-0.351473	0.27303	0.259161	0.297276	0.351571	NA	NA	NA	NA	NA	NA	NA	NA	NA	NA	NA
CHAMP1	-0.0540889	-0.100768	-0.197322	-0.00094346	-0.132407	-0.192972	-0.166623	-0.632815	-0.240315	-0.118094	-0.600101	-0.206455	0.355624	0.348132	0.406447	0.370142	0.309949	0.279298	0.426843	0.307539	NA	NA	NA	NA	NA	NA	-0.0409232
CHCHD1	NA	NA	NA	NA	NA	NA	-0.855413	-0.614909	NA	-0.584197	-0.505339	-0.712543	-0.25643	-0.266489	-0.215534	-0.141755	NA	-0.880924	-0.5786	-0.830937	NA	NA	NA	NA	NA	NA	NA
CHCHD2	-0.103168	0.0804685	-0.0415948	0.12941	0.227269	0.170515	-0.0555847	-0.0742659	-0.0676501	-0.0367852	-0.19674	-0.151979	0.622109	0.605047	0.329173	0.630341	0.118382	0.370512	0.540255	0.451283	0.100715	-0.318627	0.00892848	0.0563686	0.127608	0.123827	0.492384
CHCHD3	0.394795	0.402421	0.363833	0.39765	0.546036	0.451572	0.19592	0.212867	0.202288	0.0695399	0.0443943	0.129159	0.29955	-0.0518359	0.210791	0.676629	0.546629	0.735956	0.755994	0.787404	-0.289851	-0.319344	-0.133645	-0.252385	-0.220565	-0.333645	0.495876
CHCHD4	-0.339341	-0.382488	-0.481746	-0.616117	-0.313014	-0.242326	NA	NA	-0.828913	NA	-0.658556	-0.568722	-0.142831	-0.160508	0.0829091	0.283851	0.0120085	-0.0181668	0.187068	0.0523599	NA	NA	NA	NA	NA	NA	-0.238033
CHCHD5	-0.898146	NA	NA	NA	NA	NA	-0.717207	0.383967	-0.604229	-0.704279	-0.781581	-0.666915	0.343326	-0.0508127	0.102132	-0.0418077	-0.909057	-0.897823	-0.81474	-0.455733	NA	NA	NA	NA	NA	NA	NA
CHCHD6	-1.10388	NA	-0.599798	-0.564429	-0.319742	-0.44231	-0.745648	-0.28492	NA	NA	NA	NA	-0.289021	-0.593794	-0.282761	-0.0624683	-0.0281867	-0.27378	-0.317827	-0.217816	NA	NA	NA	NA	NA	NA	-0.543523
CHCHD7	-0.402575	-0.427233	-0.746075	-0.667209	-0.742984	-0.638568	NA	NA	NA	NA	NA	NA	-0.471346	-0.396564	-1.2166	-0.527327	-0.822578	-0.398131	-0.432169	-0.440626	NA	NA	NA	NA	NA	NA	NA
CHD1	-1.0822	-1.29509	-1.20544	-0.253024	-0.572491	-0.597657	-0.339662	-0.393544	-0.308703	-0.43726	-0.728456	NA	0.0881655	0.306603	0.305052	0.377201	0.0387799	0.0584998	0.0664373	-0.0809439	NA	NA	NA	NA	NA	NA	NA
CHD1L	-0.72352	-0.945479	-1.38794	-0.425567	-1.04136	-1.04817	-0.604659	NA	NA	NA	NA	NA	NA	NA	NA	NA	NA	NA	NA	NA	NA	NA	NA	NA	NA	NA	0.210761
CHD2	-0.385601	-0.630844	-0.519685	-0.448451	-0.425086	-0.433105	-0.663074	-0.805401	-0.692575	-0.493993	-0.828699	NA	-0.0928856	-0.0723198	-0.0287003	0.200178	0.297949	0.237152	0.378129	0.295658	NA	NA	NA	NA	NA	NA	-0.501176
CHD3	0.0329098	-0.0957621	-0.0525302	0.349037	0.123877	0.0596693	-0.24042	-0.346427	-0.301615	-0.761539	-0.454779	-0.7018	NA	NA	0.187837	0.293156	0.694804	0.70032	0.681885	0.686919	NA	NA	NA	NA	NA	NA	0.143301
CHD4	0.445997	0.409988	0.502839	0.615537	0.449747	0.515747	0.635158	0.626664	0.635613	0.659534	0.621937	0.614588	1.05021	1.25357	1.33771	1.2069	1.27169	1.19506	1.19181	1.15604	NA	NA	NA	NA	NA	NA	0.129095
CHD8	-0.450719	NA	-0.0293649	-0.553181	-0.87118	NA	-0.738526	NA	-0.765016	-0.86091	-0.677862	-0.723555	0.298246	0.289431	0.476393	0.342	0.181587	0.12877	0.0517431	0.202429	NA	NA	NA	NA	NA	NA	0.224767
CHEK1	NA	NA	NA	NA	NA	NA	-0.845684	NA	NA	-0.723593	-0.83429	-0.837255	0.0626287	0.116161	0.0710384	0.155294	NA	NA	-1.04855	NA	-0.746379	-0.367693	-0.767177	-0.608784	-0.514404	-0.592683	NA
CHERP	0.174229	0.211672	0.135026	0.0333585	-0.0974686	-0.256424	0.176613	0.0175411	-0.0608849	-0.269203	-0.195079	-0.237073	0.677589	0.601054	0.498977	0.653887	0.681544	0.716017	0.70603	0.721425	NA	NA	NA	NA	NA	NA	0.114001
CHID1	-0.143921	-0.105214	-0.125685	-0.434933	-0.181566	0.0748033	-0.43113	-0.378538	-0.290141	-0.528606	-0.438078	NA	-0.433567	-0.393126	-0.218814	-0.339161	0.138386	-0.0630283	0.0696657	0.00151094	-0.720072	-0.603966	-0.599645	-0.679465	-0.868996	-0.625748	0.347515
CHKB	-0.194744	-0.193331	-0.311443	-0.525564	-0.659627	-0.645479	-0.504119	-0.612057	-0.924417	-0.454795	-0.112385	-0.842808	-0.585116	-0.498301	-0.319486	-0.682544	-0.227721	-0.125868	-0.279563	0.0469676	NA	NA	NA	NA	NA	NA	0.183665
CHM	-0.871636	NA	NA	-0.536871	-0.990056	-0.796562	-0.872092	-0.792698	-0.709513	NA	NA	NA	-0.551749	-0.543294	-0.394131	-0.523991	-0.491633	-0.502669	-0.657098	-0.452315	-1.11021	-0.222279	0.134453	-0.270154	-0.639017	-0.488736	-0.536297
CHMP1A	0.0915522	0.0298302	0.00641002	-0.0646584	0.0496209	-0.0564591	NA	-0.691192	NA	-0.231818	-0.363985	-0.220672	-0.167252	-0.0784758	-0.0803729	0.0919654	0.0441021	-0.0188962	0.0810838	0.084709	0.17897	0.0940276	0.168501	0.0391385	0.0981624	0.141935	0.673459
CHMP1B	0.00932259	0.0381225	-0.0166589	0.0317032	0.126022	0.279162	-0.562016	-0.89716	-0.720162	-0.359557	-0.452468	-0.504332	-0.252148	-0.289467	-0.24589	-0.203541	0.271398	0.121162	0.230856	0.229832	-0.902036	0.118697	0.16293	0.0162953	0.00207456	-0.0211883	0.00924193
CHMP2A	-0.0880294	0.112508	-0.0260691	0.0194863	-0.106294	-0.0336335	-0.885665	-0.711084	-0.581691	-0.520246	-0.450259	-0.721083	-0.364324	-0.497184	-0.0196148	0.182099	0.23613	0.235868	0.298256	0.269749	0.30401	0.160034	0.282456	0.229325	0.419034	0.323054	0.354763
CHMP2B	NA	-0.462776	-0.42552	-0.851395	-0.629612	-0.925666	NA	NA	NA	-0.937209	-0.768296	-0.80467	-0.472791	-0.308602	-0.275141	-0.110615	-0.162302	-0.131082	-0.264629	-0.131473	-0.116545	-0.084489	-0.16414	-0.166289	0.0242197	-1.07876	-0.308416
CHMP4A	0.111407	0.16567	0.0113769	-0.0842465	-0.080687	-0.159757	-0.510246	-0.325014	-0.486615	-0.0130527	-0.0485376	0.0196635	0.471405	0.537362	0.47201	0.461165	0.143771	-0.0581274	-0.0532055	0.0670581	0.329644	0.103195	0.50626	0.350543	0.355625	0.172004	0.0811416
CHMP4B	0.0015491	0.17267	0.135026	0.0295076	0.132047	-0.0774705	-0.282365	-0.236913	-0.221886	0.10969	0.0175975	0.137021	0.405549	0.53612	0.58318	0.725797	0.502481	0.34254	0.518541	0.5439	0.510171	0.145326	0.705903	0.510785	0.538315	0.465827	0.235111
CHMP5	-0.447755	-0.380107	-0.669796	-0.839465	-0.848559	-0.752597	-0.110369	-0.723545	-0.591117	0.111541	-0.0212355	-0.092791	-0.134129	0.019237	0.0852322	0.214543	0.186891	0.433189	0.230513	0.58417	-0.948235	-0.582572	-0.25092	-0.320561	0.0126469	-0.791606	0.492985
CHMP6	-0.527499	-0.311673	-0.366448	-0.448451	-0.313014	-0.194732	-0.533014	-0.381175	-0.529636	-0.71942	NA	-0.761404	-0.238079	-0.374517	-0.364286	0.105599	0.0446187	-0.0363224	0.138346	-0.0006709	-0.475712	-0.993166	-0.302213	-0.457994	-0.251883	-0.441267	-0.344193
CHMP7	-0.00028658	0.00727638	0.0298586	-0.331264	-0.127741	-0.135069	-0.0147565	-0.091534	-0.135938	-0.15679	-0.363985	-0.210497	-0.0408096	0.0114671	0.158109	0.0533116	0.665543	0.591372	0.521768	0.647049	0.255772	0.368761	0.12803	-0.00309904	0.336283	-0.180463	0.329906
CHORDC1	0.548042	0.558345	0.626597	0.593658	0.444061	0.15219	0.640856	0.526023	0.440393	0.411166	0.390145	0.452106	0.781101	0.687546	0.745047	0.658177	0.45421	0.369435	0.264715	0.397557	0.462683	0.387272	0.446705	0.746533	0.564145	0.695935	0.747447
CHP1	-0.536415	-0.70241	-0.90397	-0.688979	-0.831256	-0.702866	-1.09529	NA	-1.19565	-0.530447	-0.326832	-0.364293	0.0358283	0.0745928	0.202643	0.53973	-0.2238	-0.324978	0.162935	-0.0798959	-1.39403	-0.869863	-0.839444	-0.76124	-1.26385	-0.915616	-0.776267
CHRAC1	-1.06345	NA	-0.51515	-0.525564	-0.689557	-0.863127	-1.03436	NA	NA	-0.199969	-0.383953	-0.339613	NA	-0.911402	-0.832273	-0.0570717	-0.0163715	0.0874266	0.0297783	0.107086	NA	NA	NA	NA	NA	NA	-0.802414
CHTOP	0.258852	0.322582	0.291804	0.220387	0.259079	0.193092	0.0115673	0.0836441	0.0610363	-0.0106516	-0.0330669	-0.0401721	-0.0649853	0.197568	0.272517	0.477491	0.603998	0.580222	0.775313	0.598518	NA	NA	NA	NA	NA	NA	0.695961
CHUK	-0.393794	-0.564356	-0.635959	NA	NA	-0.845386	-0.495365	-0.720946	-0.494443	-0.427287	NA	-0.249255	-0.176307	-0.0529795	-0.107542	0.0931981	-0.0430152	-0.0248996	-0.140587	0.0119263	-0.592354	-0.578237	-0.622104	-0.963422	-0.679465	-0.652239	-0.661784
CHURC1	NA	NA	-0.894392	-0.781832	NA	-0.682402	-0.789073	-0.612057	-0.912184	NA	-0.534594	-0.541842	-0.389219	-0.488306	-0.39658	-0.637789	-0.833343	NA	-0.71016	NA	NA	NA	NA	NA	NA	NA	-0.628472
CIAO1	-0.166607	-0.0922922	-0.18962	-0.337194	-0.316418	-0.385635	-0.229442	-0.121	-0.170124	-0.759771	-0.430958	-0.184456	0.295428	0.117465	0.0047243	0.0372067	-0.0808975	-0.177416	-0.21095	-0.16068	0.0203123	-1.16067	0.00598003	0.00181676	0.0335242	-0.0267219	0.446465
CIAO2A	-0.828068	-0.850131	-0.703898	-0.56896	NA	NA	-0.834634	NA	-0.476119	-0.625644	NA	-0.719009	-0.143528	-0.190911	-0.12167	-0.38817	-0.65692	-0.557719	-0.6263	-0.605098	-0.320949	-0.908928	-0.448613	-0.519254	-0.561388	-0.538547	-0.600928
CIAO2B	-0.212783	-0.382488	-0.253007	-0.778384	-0.438304	-0.560349	-0.350424	-0.189123	-0.299298	0.153439	0.0952579	0.259199	0.0585877	-0.117016	0.0516828	-0.00289883	-0.263457	-0.18349	-0.177294	-0.162812	0.169426	-0.915616	0.00113886	0.0196058	0.10763	-0.0587733	0.737366
CIAO3	-0.618191	-0.574182	-0.714357	-0.397291	-0.4657	-0.601913	-1.34464	-0.249902	NA	NA	NA	NA	-0.204517	-0.394267	-0.507399	-0.479894	0.14808	-0.108873	-0.0386325	-0.373664	NA	NA	NA	NA	NA	NA	-0.159574
CIAPIN1	-0.1077	-0.14849	-0.244109	-0.0229463	0.0216813	-0.12785	0.0499244	-0.0426172	0.0514512	-0.195598	-0.373642	-0.184456	0.62759	0.540536	0.477207	0.611643	0.277397	0.355088	0.0505064	0.298122	0.397767	0.30858	0.581753	0.343231	0.421752	0.402789	0.881108
CIB1	-0.376508	-0.46431	-0.716515	-0.381205	-0.877638	-1.29749	NA	NA	-0.855471	-0.693832	NA	-0.604001	-0.258233	-0.35992	-0.220442	-0.346539	-0.0582267	-0.0215882	0.0179561	-0.051633	NA	NA	NA	NA	NA	NA	-0.422762
CIC	-1.06041	-1.03436	-0.855378	-0.764278	-1.01146	-0.954539	NA	NA	NA	NA	-0.714164	NA	0.104989	-0.0147616	-0.105294	-0.319544	-0.621089	-0.243338	-0.390173	-0.480215	NA	NA	NA	NA	NA	NA	-0.529162
CINP	-0.873331	NA	-0.961348	NA	NA	-0.952299	NA	NA	NA	-1.27425	NA	NA	-0.529612	-0.46586	-0.454804	-0.58944	-0.964724	-0.655828	-1.10448	NA	NA	NA	NA	NA	NA	NA	-0.659675
CIRBP	-0.430846	-0.547146	-0.508501	-0.314149	-0.283645	NA	-0.165136	-0.104767	-0.0267501	0.0169766	-0.043031	-0.000555123	-0.0288037	-0.07642	-0.0709021	0.528632	0.596722	0.510461	0.724532	0.615595	-0.0136194	-0.576234	-0.167942	-0.107311	-0.341732	-0.381219	0.385281
CISD1	0.474627	0.509534	0.491438	0.484271	0.324198	0.295018	0.309182	0.188474	0.0942771	0.0695399	0.00867094	0.00230311	0.332126	0.416332	0.509292	0.55209	0.707937	0.543387	0.725801	0.530862	0.228315	-0.809595	-0.186165	0.251281	0.157258	0.000871394	0.344342
CISD2	-0.192064	-0.0468997	-0.270876	-0.274983	-0.316418	-0.265456	0.0326282	0.12848	0.354811	0.34445	0.303371	0.0710109	0.251604	0.292795	0.431116	0.370521	0.241275	0.0116118	0.33245	0.25564	-0.576738	-0.660004	-0.55101	-0.323802	-0.695425	-0.495273	-0.302921
CISD3	-0.558721	NA	-1.28458	NA	-1.27639	NA	-0.86918	-0.854549	-0.842486	-0.991426	NA	NA	-0.793473	NA	-1.11802	-0.479688	-1.02605	-0.301265	-0.445012	-0.535183	NA	NA	NA	NA	NA	NA	-0.564542
CISH	NA	NA	NA	NA	NA	NA	-0.866186	NA	NA	NA	NA	NA	-0.196518	-0.408855	-0.329864	-0.3555	NA	NA	NA	NA	NA	NA	NA	NA	NA	NA	NA
CIZ1	-0.952359	-1.12246	NA	-0.539339	NA	NA	-1.30545	NA	NA	-0.712898	NA	-0.7684	-0.178273	-0.594737	-0.0866886	-0.000926441	0.0766796	-0.0367208	0.109829	0.238929	NA	NA	NA	NA	NA	NA	-0.0011082
CKAP4	-0.319249	-0.397133	-0.564044	-0.551384	-0.752788	-0.701795	-0.0147565	-0.151276	0.0200816	-0.43726	-0.155023	-0.43534	-0.109464	0.109507	0.131297	0.154156	0.0449085	-0.0650193	0.224489	0.112606	-0.113094	-1.15546	-0.00241725	-0.277972	-0.0894612	-0.315659	-0.709096
CKAP5	0.206931	0.154224	0.208957	0.125411	0.176375	0.132814	0.436818	0.336521	0.414391	0.476487	0.45701	0.482735	0.844293	1.08166	1.12234	0.941283	0.855632	0.688627	0.844936	0.773453	-0.63201	-0.805251	-0.595921	-0.51657	-0.884632	-0.388686	0.241829
CKS2	NA	NA	NA	NA	NA	NA	-1.01364	NA	NA	-0.652183	-0.851505	-0.69552	-0.290399	-0.564361	-0.503726	-0.277875	NA	NA	NA	NA	NA	NA	NA	NA	NA	NA	NA
CLASP1	-0.369352	-0.394301	-0.50518	-0.406378	-0.576205	-1.07692	-0.165136	-0.00826894	0.0296061	-0.220583	-0.44369	-0.447115	0.179275	0.285227	0.370425	0.427858	0.147574	-0.200915	-0.166753	0.00354628	NA	NA	NA	NA	NA	NA	0.0445446
CLASP2	-0.588492	-0.622803	-0.635959	-0.0129173	0.980206	1.02615	-0.48195	-0.643412	-0.397525	-0.678493	-0.706825	-0.86648	0.185435	0.256826	0.270527	0.281766	NA	NA	NA	NA	NA	NA	NA	NA	NA	NA	-0.0673738
CLASRP	-0.89403	-0.506032	-0.551185	-0.888695	-0.377086	-0.516176	-0.914831	-0.775676	-0.828913	-0.977551	NA	NA	-0.303162	-0.377228	-0.144678	0.0217748	-0.478073	-0.470071	-0.313286	-0.32303	NA	NA	NA	NA	NA	NA	-0.520953
CLC	0.757301	0.71482	0.697729	0.641616	0.58551	0.619341	0.0219596	-0.111705	-0.0580499	-0.819871	-0.56175	-0.615976	-0.166384	-0.953004	NA	-0.35495	NA	-0.575502	-1.09749	-0.347087	NA	NA	NA	NA	NA	NA	-0.265673
CLCC1	NA	-0.394301	-0.462959	0.322163	-0.323176	-0.875141	-0.812201	NA	-0.494443	NA	NA	NA	-0.622264	-0.755269	-0.535095	-0.229602	-0.147596	-0.202974	-0.00858615	-0.342809	NA	NA	NA	NA	NA	NA	0.283917
CLDND1	NA	-0.932865	NA	-1.05424	NA	NA	-0.299484	-0.336242	-0.607035	-0.831044	NA	-0.789605	-0.667393	-0.525652	-0.519789	-0.317338	NA	NA	NA	-1.14496	NA	NA	NA	NA	NA	NA	NA
CLEC16A	NA	NA	NA	NA	NA	NA	NA	-0.701804	-0.472401	-0.424373	-0.318676	-1.0542	NA	NA	NA	NA	-0.336089	-0.433452	-0.422626	NA	NA	NA	NA	NA	NA	NA	-0.565207
CLIC1	1.23508	1.19578	1.1615	0.981415	1.08629	1.08385	1.17733	1.30277	1.2194	1.45227	1.42579	1.28712	1.87238	1.72637	1.74515	1.87833	1.1502	1.25239	1.04214	1.18497	1.39674	1.54951	1.34884	1.52358	1.23389	1.23389	1.70506
CLIC2	NA	NA	NA	-0.700946	NA	NA	NA	NA	NA	NA	NA	NA	-0.46489	-0.833914	NA	NA	-0.844394	NA	-0.861761	NA	NA	NA	NA	NA	NA	NA	NA
CLIC4	NA	NA	NA	NA	NA	NA	-0.545274	-0.708685	-0.989958	-0.769792	NA	-0.639568	-0.836783	-0.241955	-0.334223	-0.349321	NA	-1.20255	-1.7414	-1.16458	-0.452265	-0.944662	-0.769932	-0.491988	-0.742369	-0.686158	1.65605
CLIC5	-0.555065	-0.824847	-0.601794	-0.672742	-1.57605	NA	-0.90747	NA	-0.490393	-0.550205	NA	-0.422	NA	NA	-0.264384	NA	NA	-0.995006	NA	-0.973594	NA	NA	NA	NA	NA	NA	NA
CLINT1	0.230802	0.294386	0.120425	0.283612	0.259079	0.223897	-0.0010632	-0.106848	-0.360732	0.0935751	0.117761	-0.0199129	0.579658	0.466454	0.548792	0.617972	0.446093	0.357822	0.386861	0.334593	0.0971123	0.478423	0.585866	0.389245	0.47894	0.343624	0.539802
CLIP1	-0.269091	-0.2712	-0.0924179	-0.265308	-0.48929	-0.531487	-0.0870081	0.132146	0.136603	0.0169766	-0.0537015	-0.178346	0.240247	0.411889	0.258078	NA	NA	0.211397	NA	NA	0.607516	0.344423	0.954444	0.633762	0.838882	0.760101	-0.286068
CLK3	NA	NA	NA	-0.781832	-0.814291	NA	-0.849003	-1.20859	NA	NA	NA	NA	0.104886	0.271109	0.260218	-0.065063	-0.119849	-0.0595669	-0.0429227	-0.116381	NA	NA	NA	NA	NA	NA	-1.15717
CLN3	NA	NA	NA	NA	NA	NA	NA	NA	NA	NA	-0.958066	-0.831109	NA	NA	NA	NA	-0.834094	-1.01291	-0.945036	-0.978829	NA	NA	NA	NA	NA	NA	NA
CLN6	NA	NA	NA	NA	-0.566745	-0.97782	NA	NA	NA	NA	NA	NA	-0.321081	-0.195163	-0.458704	-0.457725	-0.252299	-0.118429	-0.591061	-0.508703	NA	NA	NA	NA	NA	NA	NA
CLNS1A	-0.339341	-0.2712	-0.15647	-0.0926681	-0.251299	-0.258319	-0.192942	0.00633906	-0.0488905	-0.285907	-0.305886	-0.164142	0.444251	0.315017	0.0630845	0.0735934	-0.132056	-0.0456901	-0.43503	-0.222857	-0.129705	-0.974395	-0.0880218	0.443268	0.460679	0.269529	-0.424561
CLP1	NA	-0.924165	NA	-0.721261	-0.479692	-0.688991	NA	-0.516043	NA	-0.99631	NA	NA	-0.393743	-0.0282971	-0.0856901	-0.0539209	-0.0482022	-0.102129	-0.196251	-0.132564	NA	NA	NA	NA	NA	NA	0.517372
CLPB	-0.629225	-0.486909	-0.470733	-0.739996	-0.712694	-0.56286	-0.380862	-0.533519	-0.400862	NA	-0.79888	-1.0496	0.279985	0.330415	0.372606	0.180688	0.166512	-0.000650677	0.0120624	-0.157313	-0.106516	0.0203123	0.0242197	-0.239334	-0.0940346	-0.0748587	-0.465898
CLPP	0.128845	0.108863	0.18221	-0.149682	0.0395883	-0.0438333	0.0013809	-0.0426172	-0.0200906	-0.228847	-0.282825	-0.171999	0.266517	0.296346	0.134608	0.225932	-0.0264746	0.144014	0.219731	0.316225	0.406131	-0.00116466	0.350543	0.391179	0.232908	0.192452	0.686875
CLPTM1	NA	NA	NA	-0.747421	-0.333455	-0.445198	-0.237089	-0.233781	-0.18388	-0.198318	-0.076593	-0.206455	-0.0682003	-0.11311	0.040719	-0.0914245	-0.510247	-0.226246	-0.454019	-0.419112	NA	NA	NA	NA	NA	NA	-0.244392
CLPTM1L	-0.579712	NA	-1.27645	-0.978335	-0.653496	-0.698092	-0.459367	-0.904066	NA	-0.142973	-0.0886707	-0.782045	-0.599532	-0.711132	-0.159374	-0.410799	0.166795	-0.0207651	0.109554	0.102661	-0.633058	-0.603434	-0.806667	-0.601834	-0.789337	-0.811854	-0.55185
CLPX	NA	-1.24677	-0.989682	NA	NA	-1.69576	0.00805159	-0.216632	0.0262016	0.0385883	-0.134862	0.312022	0.47326	0.422178	0.441746	0.553662	-0.0411276	-0.00106872	0.035801	0.0381084	-0.169335	-0.0483956	0.00479322	0.19021	0.231022	0.0981624	-0.0715808
CLTA	0.0457211	0.0489476	-0.292713	-0.253024	-0.01634	-0.0322111	-0.566372	-0.524007	-0.368897	0.0356188	0.137417	-0.142798	0.273634	0.126044	0.403785	0.39382	0.117343	0.143853	0.189312	0.166007	0.249618	-0.00712842	0.26201	0.106509	0.0493884	0.243039	0.381692
CLTB	0.275138	0.227228	0.202145	0.0227936	0.146793	0.143736	-0.468287	NA	NA	-0.106446	-0.0146231	-0.0944091	0.351794	0.0752265	0.191495	0.213934	0.430223	0.284421	0.388449	0.448001	0.431154	0.0473267	0.519651	0.155005	0.182014	0.30529	0.13108
CLTC	1.69881	1.69186	1.60378	1.5394	1.5357	1.55011	1.6562	1.53314	1.62771	1.93689	1.73093	1.67967	2.52083	2.92393	2.83718	2.54429	2.29411	2.23177	1.91592	2.13087	1.01567	0.864273	1.1635	1.22436	0.99835	1.24505	0.47474
CLTCL1	-1.19383	NA	NA	NA	NA	NA	NA	NA	NA	NA	NA	NA	-0.139644	-0.106532	-0.0968499	-0.116607	-0.766665	NA	-1.20813	NA	NA	NA	NA	NA	NA	NA	NA
CLU	NA	NA	NA	NA	NA	NA	-0.707597	-0.502719	-0.437614	-0.204651	-0.110649	-0.0767258	NA	NA	NA	NA	NA	NA	NA	NA	-0.722716	-0.38723	-0.347779	-0.929914	-0.582154	-1.04408	0.516698
CLUH	NA	NA	-0.741099	NA	NA	NA	0.0763293	0.00426266	0.129469	0.147982	0.137417	0.249613	0.437345	NA	0.518131	0.542875	NA	NA	NA	NA	-0.71204	-0.338317	-0.942859	0.239807	-0.0992428	0.0501609	NA
CLYBL	-0.259493	-0.253513	-0.431148	-0.370529	-0.393092	-0.458755	NA	-0.511494	-0.699886	-1.05226	NA	NA	0.0534005	-0.204688	-0.156515	-0.578448	0.146974	0.145734	0.234728	0.161339	0.157258	0.354086	0.31638	-0.0335844	0.0525409	0.00937347	-0.202043
CMAS	0.516429	0.506785	0.484853	0.432864	0.479757	0.45354	0.291886	0.153596	0.33392	0.137444	0.0854669	-0.231933	0.233417	0.318494	0.459788	0.481059	0.810326	0.787667	0.698309	0.698271	-0.183344	0.0608895	-0.0416415	-0.537975	-0.419414	-0.53894	0.430147
CMC4	-0.519039	-0.496546	-0.301649	NA	NA	NA	NA	NA	NA	NA	NA	NA	-1.18955	NA	-0.711912	-0.360591	-0.661854	-0.19722	-0.353034	-0.358952	NA	NA	NA	NA	NA	NA	NA
CMPK1	0.3904	0.379596	0.360485	0.32008	0.517729	0.476557	0.368809	0.450194	0.457112	0.400543	0.468062	0.440633	0.63694	0.643645	0.683915	0.406464	0.550532	0.615745	0.415505	0.549446	0.528348	0.442809	0.510785	0.318086	0.333031	0.469516	0.563402
CMPK2	-0.758649	-0.69889	-0.529334	-0.428543	-0.675556	-1.08633	0.307137	0.268216	0.414391	-0.542749	-0.650316	-0.789605	-0.620298	NA	-0.928789	-0.642837	-0.359217	-0.316242	-0.292506	-0.205913	0.0135722	0.0915363	0.213513	0.303449	0.116484	0.0242197	-0.561747
CMSS1	-0.311145	-0.315619	-0.279574	-0.327071	-0.468321	-0.396692	-0.609083	-0.330379	-0.636112	-0.566493	-0.861801	NA	0.118411	0.0150371	0.151547	0.158421	0.274145	0.275944	0.255286	0.289597	NA	NA	NA	NA	NA	NA	NA
CMTM7	-0.343604	-0.70241	-0.647357	-0.487683	-0.493762	NA	-0.70604	-0.529125	-1.01315	NA	NA	-0.725562	NA	NA	-0.868438	NA	NA	NA	-0.58058	NA	NA	NA	NA	NA	NA	NA	-0.661566
CMTM8	-1.02699	NA	NA	NA	NA	NA	NA	NA	NA	NA	NA	NA	NA	NA	NA	NA	NA	NA	NA	NA	NA	NA	NA	NA	NA	NA	NA
CMTR1	-0.219627	-0.408775	-0.295272	-0.122395	-0.208295	-0.436038	0.192765	0.0495193	0.196284	-0.359557	-0.402794	-0.383659	0.167469	0.242766	0.216164	0.204808	0.422115	0.427731	0.405166	0.496698	NA	NA	NA	NA	NA	NA	NA
CNBP	0.227542	0.308561	0.251704	0.220387	0.463256	0.309188	0.252034	0.270879	0.221007	0.336216	0.32429	0.243939	0.688872	0.653128	0.77613	0.872952	0.502944	0.52066	0.589164	0.565819	0.613057	0.392537	0.543745	0.469516	0.611415	0.67807	1.56984
CNDP2	0.962707	0.987529	0.965248	0.843931	0.868151	0.883477	0.913835	0.952079	0.96789	1.01596	0.973293	1.02901	0.92394	0.868576	0.793152	1.00102	1.11639	1.19506	0.904045	1.19389	1.4481	1.04279	1.28366	1.32859	1.33627	1.34138	0.896679
CNIH4	-0.336271	-0.347643	-0.410471	-0.384739	-0.188767	-0.272355	-0.429197	-0.527041	-0.410861	NA	-0.98243	NA	-0.253707	-0.165886	0.0809432	-0.362487	NA	-0.444651	-0.277882	-0.411002	NA	NA	NA	NA	NA	NA	-0.343062
CNN2	1.24098	1.217	1.22939	0.73481	1.09024	1.10705	0.595436	0.428692	0.498628	0.805709	0.922146	1.08953	0.981624	0.91269	1.05771	0.875385	1.06641	0.998215	0.908606	1.16221	1.42768	1.34138	1.38872	1.00515	1.14945	1.14628	2.07244
CNNM3	0.362746	0.39479	0.386262	0.250007	0.355143	0.348896	0.233283	0.24813	0.176259	0.129448	0.223701	0.188323	-0.792823	-0.389094	-0.268698	-0.414985	-0.181189	-0.24219	-0.295422	-0.183461	NA	NA	NA	NA	NA	NA	-0.542459
CNOT1	0.388008	0.389002	0.430579	0.200581	0.227269	0.184058	0.399568	0.24813	0.379357	0.248905	0.251847	0.263642	0.783994	0.866154	0.822205	0.876317	0.903478	0.784498	0.713104	0.787882	-0.512588	-0.370963	-0.852413	-0.685114	-0.481225	-0.645824	0.204281
CNOT10	-0.450719	-0.762042	-0.863299	-0.472618	-0.143728	NA	-0.863081	-0.287438	-0.196612	-0.90399	-0.849044	-0.719009	-0.174712	0.159355	0.131915	0.211378	0.0178998	0.153665	-0.0495778	0.057672	NA	NA	NA	NA	NA	NA	0.0401081
CNOT11	-0.524638	-0.681079	-0.980516	NA	NA	-1.19702	NA	-0.418881	-0.0828101	-0.215066	-0.463461	-0.117363	-0.074264	-0.0585235	-0.0209108	-0.163958	-0.110785	-0.217866	-0.184808	-0.192958	NA	NA	NA	NA	NA	NA	NA
CNOT2	-0.564772	-0.628406	-0.879708	-0.458231	-0.269156	-0.344086	-0.286069	-0.75266	-0.591117	-0.248619	-0.252592	-0.253325	0.0729247	0.0707012	-0.0123097	0.107421	0.00123484	0.0218843	0.0686991	0.209936	-0.467941	-0.782017	-0.568454	-0.357148	-0.850128	-0.36632	0.489358
CNOT3	-0.0911255	-0.370779	-0.376545	-0.0797551	-1.10766	-0.813409	-0.535189	-0.156146	-0.273733	-0.0194884	-0.86885	-0.206455	0.148343	0.19787	0.231774	0.281441	0.0243374	0.0740375	-0.0586173	0.132002	-0.311217	-0.28276	-0.436959	-0.447254	-0.300421	-0.316399	0.20177
CNOT4	NA	NA	NA	NA	NA	NA	NA	NA	-1.0765	NA	NA	NA	-0.235182	-0.298488	-0.357751	-0.463087	-0.632957	-0.787077	-0.571359	-0.588083	NA	NA	NA	NA	NA	NA	NA
CNOT6L	-0.632882	-0.286848	-0.307086	-0.428543	-0.486634	-0.448469	-0.829323	NA	NA	NA	NA	NA	0.178848	0.135121	-0.00288644	0.0984711	-0.0781421	0.01858	-0.171519	0.041062	NA	NA	NA	NA	NA	NA	-0.628164
CNOT7	-0.568442	-0.506032	-0.511877	-0.442515	-0.629612	-0.963727	NA	-0.586904	NA	-0.500962	-0.679793	-0.367658	0.107924	-0.0197233	-0.0714348	-0.0760412	-0.1068	-0.291233	-0.1694	-0.293616	NA	NA	NA	NA	NA	NA	1.0708
CNOT9	-0.0024653	-0.119952	-0.202236	-0.638538	-0.578749	-0.601913	-0.590736	NA	-0.472401	0.202478	-0.0790411	0.0144692	0.35871	0.474224	0.39538	0.318234	0.322637	0.223811	0.139351	0.285062	NA	NA	NA	NA	NA	NA	1.1012
CNP	-0.0960896	-0.00642497	-0.0685976	0.127208	-0.102522	-0.0438333	0.566968	0.436992	0.518236	-0.189604	-0.190168	-0.142798	0.3351	0.347213	0.42167	0.512193	0.481685	0.271681	0.436162	0.352946	-0.0131065	0.266972	0.174144	-0.0283434	0.104933	0.0463536	0.103418
CNPY2	0.36989	0.285461	0.309628	0.0689523	0.26354	0.122809	0.387522	0.369654	0.266943	0.476487	0.541786	0.519348	0.573382	0.214894	0.254068	0.423283	0.171837	0.206053	0.440167	0.265241	0.355625	-0.315194	0.267686	0.546453	0.509512	0.266972	-0.0305437
CNPY3	-0.391888	-0.127693	-0.104985	-0.130286	-0.174891	-0.194732	0.210291	0.2412	0.200096	-0.384131	-0.800584	-0.45223	0.302837	0.240882	0.220838	0.0225768	0.359057	0.0976474	0.268169	0.17753	0.391179	0.141582	0.632177	0.302428	0.280666	0.207519	-0.279893
CNPY4	-0.388967	-0.30715	-0.366448	-0.581884	-0.67225	-0.526772	-0.457424	-0.504937	-0.602031	-1.06681	-0.95042	-0.924372	-0.275487	-0.532159	-0.389159	-0.586562	-0.157066	-0.110777	-0.128917	-0.0614293	-0.19755	-0.531289	-0.52758	-0.666965	-0.513732	-0.5188	-0.622166
CNST	-0.385601	-0.602327	-0.455962	-1.06551	-0.733059	-0.724103	NA	-0.8837	NA	NA	NA	-1.12774	-0.825247	-0.861557	-0.421023	-0.534866	0.167198	0.280835	0.230513	0.20183	NA	NA	NA	NA	NA	NA	1.11169
CNTRL	-0.477497	-0.413252	-0.521819	-0.149682	-0.909803	-0.728128	-0.0147565	-0.511494	-0.231637	0.0336334	0.170543	0.161854	0.109454	0.0359172	0.207336	0.200806	0.452206	0.302239	0.493425	0.438321	NA	NA	NA	NA	NA	NA	-0.186075
CNTROB	NA	-0.60976	-0.638181	-0.858634	NA	-0.716974	NA	NA	NA	NA	NA	NA	-0.632013	-0.657037	-0.7082	-0.632925	-0.156103	-0.299025	-0.363873	-0.265773	NA	NA	NA	NA	NA	NA	-0.228023
COA1	NA	-0.75779	NA	NA	NA	NA	NA	NA	NA	NA	NA	NA	NA	-0.662348	-0.369381	-0.523027	-0.559044	NA	-0.576372	-0.577986	NA	NA	NA	NA	NA	NA	NA
COA3	NA	-0.224073	-1.02051	-0.665491	-0.350712	-0.298495	-0.579592	-0.657969	-0.433169	-0.45844	-0.44369	-0.510207	-0.981418	-0.217041	0.0832729	-0.112118	0.120622	0.0299336	0.0706153	0.0177576	-0.888019	-0.800661	-0.521428	-1.196	-0.499014	-0.548498	NA
COA4	-0.644954	-0.924165	-0.118481	-0.808049	-0.745588	-0.399535	-1.04761	-0.424793	-0.810619	0.0913546	-0.242367	0.00887559	-0.161318	-0.038697	-0.153863	-0.162118	-0.424612	-1.06466	-0.623511	-0.586667	-0.788071	-0.421471	-0.317767	-0.41315	-0.622104	-0.578953	NA
COA5	-0.735309	-0.70241	NA	-0.86855	-0.524269	NA	NA	NA	NA	NA	NA	NA	NA	NA	-0.448158	-0.319262	-0.38837	-0.306668	-0.0884888	-0.16147	NA	NA	NA	NA	NA	NA	-0.695347
COA6	-0.52614	-0.34183	-0.381796	-0.503568	-0.390667	-0.569224	NA	NA	NA	NA	NA	NA	-0.220441	-0.252376	-0.294563	-0.0035996	-0.202532	-0.24383	-0.173178	-0.0739113	NA	NA	NA	NA	NA	NA	NA
COA7	NA	NA	NA	NA	NA	NA	-0.82376	-0.950173	NA	-0.915843	-0.786884	-1.03551	-0.403076	-0.733435	-0.249933	-0.271408	-1.05875	-0.789644	-0.991825	-1.03856	NA	NA	NA	NA	NA	NA	NA
COASY	0.204661	0.154224	0.137976	0.154221	-0.0680852	-0.0774705	0.00563431	-0.023409	0.0877636	0.0667642	-0.132377	-0.273422	0.203446	0.0650701	0.218631	0.0437861	0.380986	0.412391	0.384979	0.429681	0.125327	0.164994	-0.176282	-0.114389	-0.114774	-0.0255407	-0.1932
COG1	-0.718094	-0.786985	-0.616932	-0.851395	-0.71126	-0.259658	-0.439996	-1.08155	-0.834638	NA	NA	NA	-0.23557	-0.188943	-0.245435	-0.445731	-0.229002	-0.449711	-0.293214	-0.504328	NA	NA	NA	NA	NA	NA	-0.0323307
COG2	NA	NA	NA	NA	NA	NA	-0.624206	NA	-0.743671	-0.629734	-0.884503	NA	-0.147266	-0.126053	-0.10996	-0.196548	-0.105412	-0.22851	-0.302991	-0.238005	-0.467042	-0.788485	-0.330746	-0.5188	-0.4094	-1.02233	-0.23394
COG3	-1.14107	-1.20849	-1.25726	NA	NA	NA	-0.32173	-0.766991	-0.476119	-0.977551	-0.411101	-0.557228	-0.0148444	-0.355939	-0.0952915	-0.137509	-0.145426	-0.098416	-0.183621	-0.137456	-0.397039	-0.0259122	-0.439776	-0.337833	-0.307386	-0.416515	-0.15409
COG4	NA	-0.767147	-0.681896	NA	NA	-0.936261	-0.901041	NA	NA	-0.648467	-1.12227	-0.708044	-0.115737	-0.0410914	-0.0116398	-0.120486	-0.277858	-0.299382	-0.417096	-0.30832	-0.504093	-0.30659	-0.550589	-0.665315	-0.585165	-0.570135	-0.432794
COG6	NA	-0.852245	NA	NA	NA	NA	NA	-1.03306	NA	NA	NA	NA	-0.151716	-0.0544959	0.146328	-0.421467	-0.145233	-0.470837	-0.232294	-0.343376	-0.950141	-0.89881	-0.343663	-0.840442	-0.665879	-1.09078	0.0310892
COG7	-0.718094	NA	NA	-0.465684	NA	-0.900191	-0.517183	NA	-1.26104	NA	NA	NA	0.0605625	0.19315	0.0752538	0.0643839	-0.0198007	-0.180602	-0.105987	-0.172234	-0.845447	-1.0329	-0.771947	-1.09078	-0.810361	-1.24637	0.232511
COG8	-0.574331	-0.767147	-0.659676	-1.23694	-1.09329	-0.046179	NA	NA	-1.15043	NA	NA	-1.13458	-0.323103	-0.734213	-0.524021	-0.573441	-0.176983	0.16156	-0.417925	-0.37932	NA	NA	NA	NA	NA	NA	-0.977283
COIL	-0.58493	-1.09344	-0.62164	-1.32213	NA	NA	-0.954183	-0.810225	-0.604229	-0.417308	-0.468655	-0.554393	-0.0414267	0.00905461	-0.225257	-0.310248	-0.269843	-0.152526	-0.351846	-0.238386	NA	NA	NA	NA	NA	NA	0.0150486
COL4A3BP	-0.635283	-0.483365	-0.985404	-0.549728	-0.47292	-0.623249	-1.24102	-0.75266	-0.712472	NA	NA	-0.75531	NA	NA	NA	NA	NA	NA	NA	NA	NA	NA	NA	NA	NA	NA	NA
COLGALT1	NA	-1.20238	-1.30679	NA	NA	NA	-0.777864	NA	NA	-0.624399	-1.08839	NA	0.152947	0.154258	0.254342	0.106909	-0.401711	-0.632605	-0.499891	-0.654877	-0.245912	-0.448407	-0.490462	-0.420211	0.260932	-0.272755	NA
COMMD10	NA	NA	NA	-1.12924	NA	NA	NA	NA	NA	NA	-0.901233	-1.31667	0.0727184	-0.0603743	-0.0941757	-0.0726308	-0.295983	-0.184853	-0.462013	-0.258164	-0.357952	-0.493875	-0.524685	-0.525982	-0.740242	-0.43134	0.535303
COMMD2	-0.657322	-0.74572	-0.654858	-0.847432	NA	-1.21986	-0.465942	-0.647289	-0.614832	-0.0451626	-0.0330669	-0.154288	-0.52383	0.0178261	-0.0246149	-0.246663	-0.336905	-0.206446	-0.314961	-0.182837	-0.465501	-0.356072	-0.128094	-0.574117	-0.473889	-0.594311	-0.593209
COMMD3	-0.0826973	-0.0468997	-0.000750193	-0.221506	-0.823772	-0.536651	-0.37654	-0.627439	-0.769403	-0.122332	-0.79888	-0.345867	-0.4468	-0.538959	NA	-0.472584	-0.57319	-0.60073	-0.629691	-0.531524	-0.0809507	-0.00343625	-0.104733	-0.192491	-0.223965	-0.0957275	0.176284
COMMD4	-0.739699	NA	-1.02266	-1.06319	-0.969267	-1.02121	-0.547376	0.100372	-0.423063	NA	-0.719044	-0.231933	-0.000314075	-0.052446	-0.00414962	-0.179384	-0.117586	-0.0213634	-0.22854	-0.0732379	NA	NA	NA	NA	NA	NA	-0.339482
COMMD5	-0.450719	-0.506032	-0.349333	NA	NA	-0.463363	-0.998244	-0.955019	NA	NA	NA	NA	-0.0191168	-0.1095	-0.091078	-0.372054	-0.79858	-0.408165	-0.504153	-0.504758	NA	NA	NA	NA	NA	NA	-0.292446
COMMD8	-0.53348	-0.329404	-0.653821	NA	NA	NA	-0.709567	NA	NA	NA	-1.40977	-0.38993	0.116282	0.112002	-0.0499549	-0.289014	-0.292571	-0.24279	-0.337896	-0.163209	-0.61638	-0.329206	-0.433494	-0.724316	-0.609639	-0.641715	0.620053
COMMD9	-0.153758	-0.199885	-0.299924	-0.877154	-1.11685	-0.916405	-0.422917	-0.446844	-0.501456	-0.220583	-0.404737	-0.16917	0.231484	0.106833	0.0751573	-0.0353336	0.130175	-0.0150684	-0.0681276	0.0261825	-0.239334	-0.671695	-0.490887	-0.193149	-0.422873	0.0218535	0.328068
COMT	-0.0201492	-0.246115	-0.0325469	-0.248362	-0.143728	-0.176072	0.0613772	0.0558216	0.353191	0.111541	0.0649884	0.132054	0.305982	0.189284	0.192784	0.357419	0.436581	0.447934	0.460618	0.438852	-0.307034	-0.0698509	-0.150976	-0.448613	-0.448613	-0.337833	0.86448
COMTD1	-0.520937	NA	NA	-0.538424	-0.498572	NA	NA	NA	NA	NA	NA	NA	-0.605596	-0.379518	-0.332568	-0.818721	-0.191636	-0.42406	-0.436915	-0.428195	NA	NA	NA	NA	NA	NA	-0.44844
COPA	0.866841	0.861577	0.864998	0.916379	0.912239	0.954829	1.04303	1.09432	1.06216	0.944233	0.901548	0.97897	1.36787	1.45195	1.50406	1.30331	1.38867	1.42822	1.25888	1.37157	0.571617	0.697461	0.229325	0.814364	0.627163	0.729872	0.158219
COPB1	0.824245	0.912295	0.869258	0.82844	0.697292	0.68506	1.07792	1.00911	1.0265	0.998776	1.00943	1.01624	1.26708	1.32548	1.32482	1.13913	1.07169	1.08802	0.92784	1.05308	0.0663305	-0.289851	-0.0787408	0.534628	0.397767	0.573008	0.420402
COPB2	0.799289	0.815	0.787079	0.89991	0.897158	0.894961	0.813676	0.74321	0.759861	0.604546	0.594594	0.566683	0.944403	1.08265	1.15564	1.03861	0.995618	0.942775	0.817562	0.880801	0.824883	0.908513	0.665382	0.868656	0.873721	0.881114	-0.265952
COPE	0.230802	0.298875	0.275487	0.294994	0.152186	0.202506	0.28745	0.334963	0.353191	0.151065	0.290021	0.291586	NA	NA	NA	NA	NA	NA	NA	NA	0.216117	-0.530024	-0.0492936	0.592769	0.265812	0.451141	0.789062
COPG1	0.720928	0.735413	0.745076	0.723118	0.635815	0.690865	0.908482	0.906102	0.844895	0.855609	0.933098	0.970176	1.24668	1.21522	1.22634	1.19485	1.19481	1.07588	1.0501	1.14471	0.50626	0.71032	0.0725245	0.778202	0.63852	0.753759	1.47509
COPG2	-0.256797	-0.350745	-0.384598	-0.442515	-0.352296	-0.294948	-0.253123	-0.0323904	-0.0828101	-0.0785991	-0.261207	-0.178346	0.0187599	0.479579	0.4816	0.253259	0.155917	0.313078	0.245476	0.337759	-0.256299	-0.325035	-0.787189	-0.236203	-0.536591	-0.52677	-0.102237
COPRS	NA	NA	NA	0.200581	-0.00749462	NA	NA	NA	NA	-0.982401	-1.04813	-1.10227	NA	NA	NA	NA	NA	NA	NA	NA	NA	NA	NA	NA	NA	NA	NA
COPS2	0.502844	0.471397	0.521997	0.46226	0.417927	0.36895	0.296081	0.415002	0.411358	0.263161	0.125951	0.298547	0.73152	0.607927	0.65679	0.603456	0.654627	0.585081	0.532426	0.678185	0.414942	0.424249	0.451141	0.382137	0.352392	0.402147	0.283702
COPS3	0.116868	0.150325	0.132447	-0.238195	-0.118929	-0.217515	0.28745	0.251264	0.372812	0.391125	0.303371	0.312022	0.433994	0.512154	0.517144	0.624353	0.693284	0.47978	0.510819	0.542924	0.218623	-0.0226726	-0.110337	0.299906	0.155278	0.0933624	0.323187
COPS4	0.53454	0.474694	0.493522	0.369248	0.320744	0.302164	0.301122	0.354494	0.383116	0.239601	0.286484	0.112804	0.795946	0.735784	0.697274	0.706023	0.686503	0.63535	0.575124	0.682274	0.651417	0.657423	0.650367	0.50762	0.512666	0.540073	0.43792
COPS5	0.267331	0.308561	0.28182	0.220387	0.215709	0.143736	0.24261	0.0690823	0.114208	0.466771	0.499303	0.387907	0.430467	0.397452	0.414923	0.403482	0.397848	0.467329	0.355861	0.443774	0.355029	0.244659	0.153137	0.042902	0.136982	0.278812	0.261143
COPS6	0.336164	0.348627	0.369268	0.0295076	-0.0656859	-0.236028	0.154448	0.2412	0.207698	-0.0274269	0.00221753	-0.0649284	0.630547	0.495816	0.471173	0.497633	0.442261	0.259011	0.242687	0.276593	0.324566	0.288058	0.201488	0.344855	0.270564	0.304388	0.36729
COPS7A	-0.186743	-0.336815	-0.18962	-0.201499	-0.661913	-0.616298	-0.877434	-0.470771	-0.381026	-0.734514	-0.508088	-0.684438	-0.252798	-0.261265	-0.195125	-0.194284	-0.126206	-0.267896	-0.330074	-0.441353	0.00317984	-0.416024	-0.099948	0.023806	-0.053332	-0.115062	0.633788
COPS7B	-0.192064	-0.331819	-0.295272	-0.271596	-0.350712	-0.220399	-0.142988	-0.856692	-0.400862	-0.487904	-0.483571	-0.267656	0.276467	0.228487	NA	0.217579	0.397249	0.374448	0.381676	0.398822	0.336283	0.543745	0.126773	0.237079	0.27613	0.177254	0.125915
COPS8	-0.0633871	-0.003049	0.0458821	0.114957	-0.00112838	0.0190521	0.0395716	-0.151276	-0.264343	-0.0426948	-0.0257126	-0.0791276	0.368177	0.315591	0.259936	0.0155959	0.489891	0.308529	0.106087	0.25276	-0.522181	-0.154879	-0.838196	0.0734274	-0.186642	0.0253726	1.56263
COPZ1	0.498202	0.302577	0.419533	0.237367	0.129344	0.139101	0.492366	0.556456	0.669647	0.594883	0.39493	0.423875	0.376357	0.395643	0.430019	0.47591	0.471124	0.448202	0.467206	0.513788	0.233763	0.483678	0.0106664	0.404195	0.246681	0.158877	1.6185
COQ5	-0.725584	-0.399789	-0.42921	-0.885572	-0.584828	NA	-0.960391	-0.614909	NA	NA	NA	NA	-0.206715	-0.42378	-0.647464	-0.152362	0.122775	0.106322	0.0748997	0.139796	NA	NA	NA	NA	NA	NA	0.72225
COQ6	-0.105688	-0.222467	-0.110874	NA	NA	-0.599965	NA	NA	NA	NA	-1.04323	-1.11368	0.0957334	0.126876	-0.0641494	0.0246753	0.118992	0.207882	0.145038	0.190056	NA	NA	NA	NA	NA	NA	0.280645
COQ7	-0.606307	-0.74572	-0.569687	NA	NA	NA	-0.604659	-0.369279	-0.493204	NA	NA	NA	-0.788447	NA	NA	-0.875681	-0.246746	-0.15777	-0.227204	-0.390636	NA	NA	NA	NA	NA	NA	-0.508728
COQ8A	-0.316663	-0.174223	-0.183565	0.0902425	-0.134087	-0.234033	-0.43113	-0.624922	-0.5231	-0.578587	-0.322697	-0.544999	-0.199096	-0.0893996	-0.186409	0.00533083	0.266672	0.272393	0.273138	0.312186	-0.0353182	-0.465501	-0.0901811	-0.237263	-0.217907	-0.324942	0.0191152
COQ9	-0.175199	-0.279626	-0.304462	-0.342487	-0.0974686	-0.224025	-0.382537	-0.378538	-0.556697	-0.344829	-0.625535	-0.814152	-0.366448	-0.0663694	-0.478102	-0.325493	-0.137003	-0.157417	0.0634241	-0.0297584	0.117581	0.0797971	0.269529	-0.192909	0.0191553	-0.137394	0.131544
CORO1A	4.05701	4.07002	4.04088	5.66598	5.87566	4.54381	4.43128	3.74012	5.08228	3.45448	3.78007	3.48652	NA	NA	NA	NA	NA	NA	NA	NA	2.52473	2.97728	2.73438	2.12358	2.25887	2.11145	2.26286
CORO1B	-1.14561	-1.15048	-0.59504	-0.858634	-0.862131	-0.379083	-0.782036	NA	-0.616225	-0.0367852	-0.502745	-0.196522	0.174138	0.0702616	-0.0410334	-0.144436	-0.454339	-0.324017	-0.237425	-0.489447	-0.206387	-1.25037	-0.817221	-0.534802	-0.569516	-0.468978	-0.262791
CORO1C	-1.127	-1.18987	NA	-0.258889	-0.253144	-0.456432	-0.294252	-0.68699	-0.331361	-0.414951	-0.701183	-0.464055	0.184373	0.562013	0.432114	0.129963	-0.37156	-0.189553	-0.18174	-0.450286	-0.181976	-0.406197	-0.822426	-0.453771	-0.440196	-0.659619	0.300183
CORO2A	NA	-1.63442	NA	-0.679678	-0.908433	-1.25541	NA	NA	-1.02341	NA	NA	NA	-0.37196	-0.316984	-0.291567	-0.695029	-0.369586	-0.137904	-0.380665	-0.314007	NA	NA	NA	NA	NA	NA	-0.643928
CORO7	0.916408	0.93535	0.923162	0.89991	0.789472	0.777299	1.07512	1.09432	1.07596	0.773798	0.55306	0.668542	NA	NA	NA	NA	0.853904	0.974168	NA	0.890091	1.12223	1.27588	1.23389	0.783988	0.889637	0.865715	0.632132
COTL1	2.08725	2.13471	2.10523	2.01002	2.12599	2.04416	1.5911	1.51017	1.41168	1.17542	1.19741	1.1489	1.42223	1.08057	1.14033	1.13432	1.40814	1.74202	1.49172	1.85847	1.6981	1.7459	1.38418	1.49931	1.34138	1.4183	1.56627
COX17	-0.42224	-0.397133	-0.364963	-0.75519	-0.415693	-1.00245	-0.875355	-0.815448	-0.993271	-0.0233935	-0.0790411	-0.0767258	0.421791	0.152183	0.350122	0.237201	-0.3301	-0.806042	-0.168613	-0.366145	NA	NA	NA	NA	NA	NA	-0.671183
COX20	-0.313603	-0.447194	-0.381796	-0.226288	-0.67225	-0.536651	-0.296658	-0.0652299	-0.118967	-0.135621	-0.663912	-0.464055	0.246813	0.218985	0.294854	0.178855	-0.00226496	0.018238	0.088634	-0.0491499	-0.394461	-0.857606	-0.539283	-0.38723	-0.765638	-0.422873	-0.0719768
COX4I1	0.958844	1.01577	1.06607	1.03192	1.06322	1.01788	0.721112	0.533134	0.61578	0.685878	0.707688	0.754238	1.00001	0.932748	1.08893	1.05929	1.25163	1.28458	1.51186	1.36625	0.967054	0.838882	0.697461	0.954444	0.795124	0.850164	0.61157
COX5A	0.481738	0.54657	0.562984	0.209313	0.48132	0.449035	-0.357132	-0.34892	-0.434587	-0.0987473	0.834933	0.0355157	1.14226	0.969004	0.93127	1.0718	1.31394	1.46447	1.46843	1.55102	0.452923	-1.08179	-0.0560064	0.431959	-0.37457	0.258263	0.735106
COX5B	0.44825	0.591716	0.60163	0.662691	0.566166	0.607384	0.350906	0.352796	0.359831	0.281366	0.255229	0.269662	0.54795	0.597187	0.804716	0.82807	0.963135	0.997484	1.44395	1.18214	0.524962	0.133982	0.206866	0.457281	0.373731	0.307323	0.837257
COX6A1	NA	NA	NA	-0.324968	-0.114505	0.0103896	-0.0646987	-0.280488	-0.511769	NA	-0.17313	-0.157423	0.227127	-0.261593	-0.180098	0.216806	-0.0158166	-0.173245	-0.64522	-0.339131	NA	NA	NA	NA	NA	NA	0.512831
COX6B1	0.681586	0.764132	0.68248	0.324444	0.541756	0.472932	0.24261	0.175678	0.159772	0.267186	0.336244	0.28078	0.533497	0.305222	0.391479	0.5569	0.492658	0.562489	0.636315	0.662799	-0.497919	-0.539283	-0.462695	-0.352065	-0.684466	-0.868996	1.65048
COX6C	0.705018	0.712058	0.669609	0.503734	0.471158	0.439269	0.229489	0.22667	0.11131	0.0205036	0.121445	0.0928139	0.460849	0.318139	0.487263	0.637089	0.547412	0.625801	0.910946	0.630995	-0.33445	-0.47045	-0.775573	-0.436959	-0.690522	-0.308783	0.700211
COX7A2	0.626724	0.600806	0.598862	0.569577	0.425041	0.468491	0.457696	0.574909	0.553236	0.437096	0.348475	0.352401	0.364391	0.308311	0.440815	0.619098	0.709154	0.783104	0.899823	0.788546	-0.924711	-0.751995	-0.389141	-1.06618	-0.754366	-0.912041	-0.236789
COX7A2L	-0.196675	-0.175894	-0.304462	-0.667209	-0.345882	-0.262614	-0.248387	-0.40657	-0.324306	-0.432379	-0.336848	-0.869665	-0.383809	-0.469173	-0.325024	-0.137741	-0.043456	-0.0515227	-0.11405	0.192537	NA	NA	NA	NA	NA	NA	-0.206455
COX7B	-0.269091	-0.0526042	-0.0899676	-0.518695	-0.316418	-0.348869	NA	NA	NA	-0.43726	-0.48999	NA	NA	NA	NA	NA	NA	NA	NA	NA	NA	NA	NA	NA	NA	NA	-0.369053
CPNE1	0.527228	0.566657	0.540208	0.586025	0.437134	0.457252	0.383083	0.319374	0.301035	0.256321	0.331646	0.28078	1.13104	0.928967	0.981835	0.432474	0.964997	0.969464	0.730579	0.470918	0.68775	0.533542	0.657423	0.5228	0.35309	0.554612	0.143053
CPNE3	0.694684	0.700483	0.706537	0.598763	0.58551	0.51347	0.347788	0.621539	0.511017	0.497443	0.313923	0.327944	0.772685	0.721691	0.804036	0.699719	0.95022	0.915374	0.797996	0.906527	0.797387	0.861491	0.609496	0.704631	0.693319	0.703562	0.332074
CPOX	0.0185338	0.0603209	0.0879898	-0.0193494	-0.352296	-0.348869	0.268349	0.204742	0.211104	0.30558	0.215557	0.295684	0.94977	0.913463	0.990264	0.913208	0.0351402	0.141789	-0.0472701	0.157638	0.111846	0.086032	0.293793	0.0298451	0.15429	0.303449	-0.400149
CPPED1	0.0693582	-0.100768	-0.0525302	0.0637927	0.0984142	0.0511956	-0.0454318	0.0690823	-0.138278	-0.469249	-0.86885	-0.334295	0.110009	0.0446727	0.189451	-0.150581	-0.411258	-0.137738	-0.155781	0.0434063	0.266551	0.271856	0.0402337	-0.0369259	-0.0394237	-0.21106	-0.10381
CPSF1	0.134062	0.074627	0.100383	0.292987	0.164776	0.0989532	0.200922	0.0793251	0.0610363	0.208183	0.182272	0.214427	0.393871	0.547512	0.668509	0.734237	0.830018	0.80482	0.787416	0.765262	NA	NA	NA	NA	NA	NA	-0.181233
CPSF2	-0.105688	-0.19096	-0.164909	-0.0679423	-0.121733	-0.0888735	0.100902	0.215345	0.215452	-0.401879	-0.419272	-0.687259	0.624623	0.413745	0.567696	0.510875	0.480733	0.538463	0.449852	0.524598	NA	NA	NA	NA	NA	NA	0.067805
CPSF3	0.104242	0.133797	0.18221	0.0433223	0.0496209	-0.0673587	0.18423	-0.0201179	0.25227	0.153439	0.146877	-0.0199129	0.598941	0.576551	0.535957	0.560689	0.364057	0.482559	0.485619	0.45214	-0.329206	-0.690908	-0.622361	-0.384997	-0.471153	-0.246737	-0.301673
CPSF4	-0.171256	-0.105214	-0.193838	-0.274983	-0.445737	-0.531487	-0.452305	-0.493473	-0.497694	-0.882502	-0.771749	-0.594183	0.145071	0.111151	0.194322	0.187116	0.111198	0.16003	0.122174	0.0957143	NA	NA	NA	NA	NA	NA	-0.571602
CPSF6	0.621424	0.577406	0.643479	0.662691	0.507165	0.460041	0.734691	0.700861	0.729977	0.748967	0.53383	0.619253	0.832668	0.817593	0.865878	0.837941	0.758892	0.865241	0.881215	0.753168	0.380679	0.446264	0.339781	0.333031	0.227117	0.0802255	0.664807
CPSF7	0.24242	0.282341	0.269227	0.255385	0.244111	0.139101	0.2812	0.197814	0.341569	0.586358	0.267758	0.468065	0.567101	0.52783	0.64216	0.607113	0.42088	0.561618	0.397503	0.484593	0.177636	0.28316	0.140448	-0.0416415	-0.0762724	-0.0852306	0.644048
CPT1A	0.03808	0.118591	0.191672	-0.00305558	0.0433486	-0.0827784	0.0146483	-0.166546	-0.174814	-0.16283	-0.223594	-0.280837	0.33244	0.427334	0.550161	0.687244	0.595782	0.547098	0.668001	0.456722	-0.235671	-0.355279	-0.383219	-0.397301	-0.52677	-0.282018	0.515922
CPT2	-0.308099	-0.311673	-0.183565	0.0398828	-0.155964	-0.21106	-0.457424	-0.298011	-0.414119	-0.478897	-0.706825	-0.536823	0.275381	0.204508	0.312807	0.322046	0.369072	0.333527	0.547682	0.401748	-0.0725053	0.0625597	-0.177996	-0.235309	-0.335077	-0.111082	-0.258314
CPTP	-1.21561	-0.895584	-0.709408	NA	NA	NA	NA	NA	-1.46072	NA	-1.16057	-0.953507	-0.73781	-0.88535	NA	0.0601624	-0.659057	-0.62056	NA	-1.3791	NA	NA	NA	NA	NA	NA	-1.01178
CRAT	-0.166607	-0.397133	-0.153135	-0.0558354	-0.244008	-0.372734	-0.35237	-0.671401	-0.432162	NA	-1.02293	NA	-0.223801	-0.160692	-0.2755	-0.507038	0.216335	0.210713	0.117294	0.18719	0.0911143	-0.17523	-0.116003	-0.452265	-0.282018	-0.321844	0.249067
CRBN	-0.246058	-0.345369	-0.265501	-0.531555	NA	NA	-1.04217	NA	NA	-0.92104	-1.2703	NA	-0.129042	-0.322989	-0.384956	-0.445289	-0.338803	-0.0222443	-0.204205	-0.135464	NA	NA	NA	NA	NA	NA	0.102607
CREB1	0.167905	0.168335	0.223342	0.0496371	0.210229	0.170515	-0.506508	-0.135287	-0.414119	0.0427693	-0.0459457	-0.0499584	0.152112	0.353632	0.173732	0.133442	0.48446	0.464825	0.275206	0.402431	-0.134069	-0.150465	0.0305372	-0.21146	-0.0649295	-0.264936	0.364727
CREBBP	-0.308099	-0.34183	-0.612535	-0.436355	-0.526031	-0.409649	-0.44686	-0.566099	-0.614832	NA	-0.817987	NA	0.158115	0.137367	0.111771	0.0381848	0.112055	0.0835699	-0.0410164	0.120597	NA	NA	NA	NA	NA	NA	-0.189264
CREG1	NA	NA	NA	-0.888695	-0.531099	NA	NA	NA	NA	NA	NA	NA	-0.883209	NA	-0.983523	-0.873366	NA	-1.11538	NA	NA	NA	NA	NA	NA	NA	NA	NA
CRELD2	-0.84338	-0.718502	NA	-0.779564	-0.425086	-0.593019	-0.42475	-0.487699	-0.429812	-0.946312	-0.903052	NA	-1.07556	-0.726077	-0.483202	-0.497266	-0.316983	-0.421999	-0.509082	-0.391825	-0.171516	-0.323287	-0.0115073	-0.211815	-0.19352	-0.194168	-0.682955
CREM	-0.447755	-0.355624	-0.418322	-0.768724	-0.624924	-0.716974	-0.707597	-0.663198	NA	-0.33689	-0.684677	-0.612053	NA	NA	-0.451877	-0.505577	NA	NA	NA	NA	NA	NA	NA	NA	NA	NA	NA
CRIP1	0.938869	0.978106	1.02342	0.681871	1.09915	1.18469	0.341718	0.354494	0.366503	0.395485	0.464159	0.468065	0.264443	0.20463	0.527758	0.522648	0.952389	0.745011	0.861116	0.774902	NA	NA	NA	NA	NA	NA	0.752125
CRIP2	0.272724	0.229731	0.247271	0.39165	0.240376	0.201405	0.0982651	0.182007	0.167614	-0.597527	-0.351011	-0.45223	-0.455986	-0.509586	-0.486791	-0.717858	-0.177939	-0.402946	-0.289656	-0.334234	NA	NA	NA	NA	NA	NA	-0.627087
CRIPT	-0.402575	-0.315619	-0.632589	-0.588291	-0.747546	-0.682402	-0.951785	-0.895443	NA	-0.999577	-0.851505	-0.929059	-0.895149	NA	-0.586153	-0.495529	-0.49339	-0.382475	-0.586403	-0.742867	NA	NA	NA	NA	NA	NA	-0.765742
CRKL	0.471047	0.462789	0.402539	0.472971	0.400481	0.414064	0.38564	0.312816	0.29712	0.243696	0.135029	0.221706	0.817956	0.595734	0.671032	0.422609	0.591795	0.724257	0.657141	0.571485	0.530345	0.0298451	0.255328	0.6913	0.43056	0.523995	0.828101
CRLF3	0.565367	0.621654	0.562984	0.751366	0.559499	0.506118	0.430266	0.428692	0.539763	0.164306	0.187031	0.14864	NA	NA	NA	NA	0.982526	0.91708	0.886867	0.988865	0.935596	1.01341	0.961115	0.812912	0.983521	0.81605	0.553538
CRNKL1	-0.290229	-0.127693	-0.15647	0.0933451	-0.126313	-0.22239	-0.0514224	-0.037486	-0.0580499	-0.262206	-0.226262	-0.175262	-0.0114821	0.14234	0.234315	0.374439	0.43085	0.483429	0.454417	0.386883	NA	NA	NA	NA	NA	NA	0.129397
CROCC	0.498202	0.374574	0.535734	0.559173	0.431818	0.40198	0.338912	0.330501	0.323509	0.281366	0.353316	0.342039	0.682144	0.72954	0.620198	0.523598	0.349387	0.44473	0.408387	0.523673	0.537721	0.738434	0.742097	0.428773	-0.255267	0.444236	-0.206298
CRTC1	-0.158515	0.0936319	0.0610615	0.1098	-0.758912	-0.904743	-0.470605	0.135042	0.173096	0.934054	-0.771749	-0.925471	NA	-0.854914	NA	NA	-0.547256	-0.531875	-0.758653	-0.317964	NA	NA	NA	NA	NA	NA	0.192056
CRTC2	-0.3227	-0.377102	-0.585081	-0.892033	NA	-0.709089	-0.883561	-0.797246	NA	NA	NA	NA	NA	NA	NA	NA	-0.0644182	-0.114835	-0.183438	-0.126456	NA	NA	NA	NA	NA	NA	-0.382545
CRTC3	-0.42224	-0.370779	-0.693976	-0.815733	-0.638843	-0.756241	-0.817435	NA	-0.547508	-0.640844	NA	-0.494992	-0.300671	-0.441265	-0.231715	-0.313814	0.136849	-0.0133128	-0.0537672	0.111932	NA	NA	NA	NA	NA	NA	0.730808
CRYBG1	0.152556	0.125257	0.118783	0.288629	0.0852211	0.00109058	-0.0870081	-0.361851	0.0492376	-0.497864	-0.48999	-0.438898	-0.0845009	0.204778	0.322535	0.0383059	0.211449	0.429383	0.263681	0.275237	-0.10897	-0.319737	-0.0705561	0.156437	-0.0739588	-0.0940346	-0.301463
CRYL1	0.165953	0.17847	0.156984	-0.0523465	0.136025	0.130002	-0.149012	-0.371045	-0.393685	-0.311037	NA	-1.25465	-0.0320916	-0.0860258	-0.285702	-0.308997	0.542892	0.577166	0.490414	0.440143	0.241464	0.502062	0.279431	0.042554	-0.0871455	-0.576234	0.232842
CRYZ	0.874406	0.906689	0.819871	0.810002	0.746888	0.767246	1.0018	0.988011	1.00979	0.174758	0.311646	0.168575	0.314875	0.446394	0.243289	0.67834	0.668278	0.671865	0.471222	0.778262	0.716811	0.617989	1.03232	0.452022	0.30858	0.781159	1.36927
CRYZL1	-0.501506	-0.394301	-0.420194	-0.527101	-0.498572	-0.436038	-0.271031	-0.319568	-0.23302	NA	NA	NA	0.289183	-0.188248	0.408252	0.102345	-0.123905	-0.15453	-0.0728342	-0.0773177	-0.0901811	-0.644712	-0.174733	-1.08035	-1.21193	-0.337363	-0.463679
CS	1.0966	1.15943	1.13531	0.93931	1.17385	1.05535	1.34315	0.929897	1.13675	1.27615	1.33202	1.11684	1.56302	1.65133	1.71161	1.4729	1.82488	1.8568	2.00798	1.68139	0.971133	0.677049	0.796304	1.05037	0.737105	1.13074	0.739218
CSDE1	-0.284249	-0.0390105	-0.110874	0.0433223	-0.0470205	0.00352676	0.484511	0.40062	0.457112	0.276674	0.253957	0.309393	0.93908	1.07773	0.967968	1.13176	0.583491	0.523619	0.69156	0.73924	0.503618	0.612109	0.683624	0.860243	0.917227	0.870443	-0.0369948
CSE1L	2.99243	0.54657	1.31463	3.69432	2.13666	1.30891	2.78493	3.9624	3.69677	1.11082	0.743196	2.82552	3.26943	3.35535	3.32305	1.35048	3.75943	2.97918	1.19029	1.06413	0.244659	-0.052474	0.186849	0.749599	0.704631	0.786707	0.393744
CSK	0.942462	0.93535	0.939177	0.868667	0.935075	0.813419	0.79138	0.650317	0.688036	0.878792	0.729342	0.722861	0.92113	1.04772	1.11583	1.27248	1.15358	1.03677	1.09099	1.15293	1.38872	1.47421	1.27588	1.11994	1.20086	1.13831	0.213696
CSNK1A1	-0.164722	-0.211468	-0.121577	-0.201499	-0.40653	-0.141445	-0.215994	-0.177868	-0.114747	-0.0274269	-0.183518	-0.187774	0.347871	0.324979	0.338918	0.548754	0.317534	0.32067	0.244103	0.361979	NA	NA	NA	NA	NA	NA	0.0363717
CSNK2A1	0.364981	0.331898	0.31427	0.453192	0.34202	0.253413	0.650412	0.639161	0.697338	0.594883	0.495139	0.745616	0.712595	0.710749	0.684455	0.807432	0.551669	0.54614	0.523361	0.552112	NA	NA	NA	NA	NA	NA	0.154274
CSNK2A2	0.170864	0.195041	0.0458821	0.261957	0.266721	0.16728	0.100902	0.12848	0.170388	0.300572	0.101055	0.140773	0.44778	0.502248	0.49301	0.434877	0.385985	0.496925	0.317998	0.415045	-0.360218	0.278012	-0.0190235	-0.260826	-0.172095	-0.188717	0.0295104
CSNK2B	0.124013	0.105221	0.116778	-0.0984486	0.154818	0.0483972	0.284052	0.180021	0.242176	0.140639	0.0907287	0.0627386	0.463203	0.436413	0.524919	0.58785	0.347828	0.363877	0.363826	0.40723	-0.223771	-0.0992428	-0.250249	-0.00524066	-0.068797	-0.0342537	0.491331
CSRP1	0.624121	0.597438	0.592073	0.543356	0.538694	0.528495	0.304041	0.311018	0.233341	0.0726195	0.117761	-0.0180047	0.61289	0.479165	0.46382	0.527774	0.374668	0.275944	0.323938	0.214958	0.840162	0.357529	0.441504	0.622255	0.241925	0.526597	0.28087
CSTA	-0.62226	-0.509736	-0.593365	NA	-0.858225	-0.834366	NA	NA	-0.806445	NA	NA	NA	-0.551136	NA	-0.774221	-0.710278	-0.861474	-0.756978	NA	NA	-0.460082	-0.368668	-0.51188	-1.25479	-0.649125	-1.28618	-0.351612
CSTB	1.27558	1.24508	1.19369	0.755141	0.942881	1.26814	0.580751	0.550812	0.511017	0.513454	0.613875	0.542941	1.24069	0.983023	1.15924	0.906072	1.44592	1.29083	1.18409	1.33285	0.581753	0.411765	0.342014	0.653822	0.355029	0.216117	1.92205
CSTF1	-0.0445478	-0.0703714	-0.0792267	0.123149	-0.124439	0.0435935	0.32746	0.0354067	0.173096	0.00788317	0.0443943	-0.110964	0.434824	0.386774	0.417576	0.29884	0.158232	0.196223	0.0222124	0.0113732	-0.605343	-0.418632	-0.531766	-0.753829	-0.704666	-0.736177	-0.191953
CSTF2	-0.00028658	-0.0940001	-0.0706254	-0.101185	0.126022	0.0704819	-0.0123069	-0.100413	-0.160424	-0.0367852	-0.0146231	0.0895285	0.423442	0.429501	0.465346	0.417943	0.371343	0.505011	0.501051	0.410976	-0.0379464	0.100715	0.0135722	-0.188096	0.125823	0.153861	0.559422
CSTF2T	-0.388967	-0.868306	-0.616932	-0.213241	-0.637201	-0.490128	-0.326934	-0.394723	-0.408827	-0.444896	-0.228138	-0.314378	0.54268	0.480831	0.468356	0.507256	0.446482	0.553352	0.541494	0.457197	-0.578953	-0.745598	-1.17107	-0.327811	-0.358598	-1.02595	0.821216
CSTF3	-0.049743	-0.118486	-0.100419	-0.226288	0.0102705	-0.199667	0.188308	0.0972031	0.0262016	0.0726195	-0.0850104	-0.117363	0.381223	0.432656	0.446808	0.463883	0.636753	0.686645	0.604996	0.619167	NA	NA	NA	NA	NA	NA	1.34109
CTBP1	0.478741	0.386071	0.45646	0.283612	0.410103	0.326518	0.268349	0.054197	-0.0200906	0.383304	0.407058	0.465334	NA	NA	NA	NA	NA	NA	NA	NA	0.6913	0.345579	0.545769	0.541564	0.531923	0.419678	0.201546
CTBS	-0.324982	-0.294405	-0.406203	-0.285011	-0.278002	-0.265456	-0.833901	-0.661616	NA	-1.12801	NA	NA	-0.233449	-0.544956	NA	-0.683045	0.0993396	-1.09328	-0.789521	-0.489925	-0.302213	-0.527886	-0.415689	-0.481225	-0.480652	-0.585165	-1.10063
CTCF	0.160044	0.220848	0.206183	0.218129	0.311864	0.275689	0.150079	0.167977	0.139983	-0.45844	-0.377023	-0.357672	0.229384	0.22737	0.391885	0.653025	0.924808	0.833523	0.935701	0.855931	NA	NA	NA	NA	NA	NA	-0.0260505
CTDP1	-0.631656	-0.323494	-0.381796	-0.217231	-0.307313	-0.312277	-0.242703	-0.561756	-0.629331	-0.779757	-0.880916	-0.708044	0.314197	0.495412	0.32162	0.287591	0.12086	0.238351	-0.0119543	0.138741	-0.043302	-0.192491	-1.0895	-0.111082	0.172899	-0.147814	-0.0827394
CTDSPL2	-0.493185	-0.230039	-0.484373	-0.485095	-0.248771	-0.379083	NA	-0.589611	-0.611863	-0.296865	-0.381663	-0.339613	0.127399	0.22719	0.282295	0.158113	0.167898	0.243826	0.216616	0.217019	NA	NA	NA	NA	NA	NA	-0.621341
CTLA4	NA	NA	NA	NA	NA	NA	NA	NA	-0.789495	-0.508083	-0.768296	-0.654801	-0.54033	-0.433968	-0.496242	NA	NA	NA	NA	NA	NA	NA	NA	NA	NA	NA	NA
CTNNBL1	0.25145	0.25215	0.168359	0.409578	0.139524	0.122809	0.412655	0.328183	0.227263	0.0578624	0.223701	0.252069	0.374415	0.572139	0.590389	0.507655	0.480197	0.540266	0.566153	0.460567	-0.523782	-0.622104	-0.594311	-0.51489	-0.711392	-0.646913	-0.19792
CTPS1	-0.131622	-0.121551	-0.143184	-0.206427	-0.0923795	0.0773141	0.499822	0.347934	0.337325	0.566914	0.597412	0.677989	1.01457	1.04047	1.00412	0.719583	-0.136741	-0.0199233	-0.126389	-0.0417959	-0.0735615	0.131977	0.254516	0.479704	0.50626	0.515713	-0.135927
CTPS2	-0.686557	-0.78302	-0.671425	-0.797413	-0.943466	-0.878749	NA	-1.13284	NA	NA	NA	NA	-0.255363	-0.200418	-0.378961	-0.491014	-0.214654	-0.128022	-0.290159	-0.164008	-0.778647	-0.593214	-0.618753	-0.695997	-0.992166	-0.844425	-0.540499
CTR9	-0.117042	-0.105214	-0.0878063	-0.070576	-0.244008	-0.06295	0.13415	0.273235	0.157674	0.10969	0.104863	0.042717	0.0104803	0.166796	0.300091	0.4146	0.308617	0.254392	0.366866	0.377352	NA	NA	NA	NA	NA	NA	0.12546
CTSA	-0.397864	-0.350745	-0.422396	NA	-0.624924	-0.593019	-0.852946	-0.86854	-0.734658	-0.195598	-0.21125	-0.447115	-0.0359897	-0.173651	-0.100507	0.000580756	-0.134139	-0.0879836	-0.361828	-0.0706084	-0.0242593	-0.777363	-0.854609	-0.465212	-0.214827	-0.637777	-0.28499
CTSB	0.527228	0.552215	0.5489	0.503734	0.581717	0.484158	0.0644322	0.137361	0.0659444	0.00112558	-0.0232786	-0.00796825	0.704138	0.586117	0.526852	0.650858	0.693815	0.772519	0.741116	0.742373	0.789074	0.686681	0.636276	0.636276	0.341286	0.400628	0.564274
CTSC	0.0725042	0.116658	0.0217523	-0.03811	0.192878	0.130002	-0.234293	-0.29271	-0.423063	-0.667275	-0.285693	-0.766122	0.382947	0.206443	0.235886	0.230572	0.000453899	0.0742806	0.0238602	0.118027	-0.794128	-0.68318	-0.563204	-0.580497	-0.780289	-0.529309	-0.352313
CTSD	0.565367	0.626535	0.621662	0.496973	0.559499	0.522288	0.593829	0.509719	0.539763	0.731472	0.630331	0.633706	0.588455	0.358505	0.516495	0.48271	0.533485	0.596709	0.55484	0.736699	0.552273	0.604699	0.478423	0.37986	0.356639	0.29545	NA
CTSG	0.694684	0.670742	0.696568	0.622866	0.50513	0.540021	-1.03225	NA	NA	-0.984966	NA	-0.989231	-0.771079	-0.566742	-1.38892	-0.730065	NA	-0.493479	-0.537565	-0.55785	-0.767177	-0.560435	-1.12695	-0.774177	-0.912756	-0.718632	NA
CTSH	-0.324982	-0.304626	-0.389467	-0.0842465	-0.17822	-0.165093	-0.384435	-0.361851	-0.472401	-1.08608	-0.692344	-0.75531	-0.0492965	-0.489368	-0.307515	-0.477317	-0.437722	NA	-0.075315	-1.10566	-1.04976	-0.48228	-0.66279	-0.97895	-0.813876	-0.101698	NA
CTSS	-0.0765808	-0.180016	-0.0630748	0.170926	0.0630917	0.0989532	0.095397	-0.198633	-0.0131695	-0.3269	-0.0985308	-0.00591702	0.012326	-0.196404	-0.0223576	0.380888	0.0369494	-0.302577	-0.0500015	0.00712122	0.42244	-0.27333	-0.270154	0.377316	0.12803	0.260132	0.478569
CTSZ	-0.46794	-0.973205	-0.564044	-0.186615	-0.244008	-0.185541	-1.08752	NA	-0.892414	-0.884824	-0.622246	-0.75531	0.0677806	-0.179283	-0.190304	-0.250883	-0.177418	-0.183797	-0.0605935	-0.227732	-0.508399	-0.826154	-0.404401	-1.09935	-0.791725	-0.347345	-0.505233
CUL1	-0.0469215	-0.0940001	-0.0847724	-0.268604	-0.204459	-0.205344	0.189816	-0.128799	0.0659444	0.113134	-0.308464	-0.0993924	0.453849	0.652876	0.671949	0.665542	0.322879	0.266015	0.174245	0.339816	-0.172095	-0.0572407	-0.073136	0.252012	-0.344633	0.139633	0.257403
CUL2	0.0851486	0.118591	0.0852737	-0.0444861	0.0890314	-0.0322111	0.284052	0.0354067	0.102647	-0.0367852	0.0132426	0.00523533	0.439884	0.522022	0.496089	0.435968	0.511409	0.586062	0.411119	0.591464	0.111231	-0.0206479	-0.0898611	0.0360569	0.0220818	0.256441	0.319234
CUL3	0.436637	0.386071	0.389468	0.377486	0.30965	0.241438	0.166154	0.170458	0.272193	0.318902	0.295128	0.305662	0.363657	0.477203	0.498251	0.657089	0.802069	0.675705	0.627405	0.62293	0.554612	0.438703	0.384935	0.411765	0.446705	0.426899	0.659895
CUL4A	-0.0664304	-0.132547	-0.0950422	-0.453109	-0.475544	-0.526772	0.00563431	-0.213289	-0.312689	0.179032	0.230851	0.23801	0.476206	0.490536	0.499824	0.598329	0.439485	0.429831	0.365956	0.336139	0.099145	0.272895	0.051635	0.0117769	0.0810861	0.224383	0.176595
CUL4B	0.128845	0.209875	0.224684	0.106939	0.129344	0.162971	0.11369	0.415002	-0.052127	0.263161	0.221879	0.342039	0.286404	0.488207	0.550668	0.430871	0.663463	0.587604	0.65911	0.684876	-0.364441	-0.467513	-0.531482	-1.06447	-0.692556	-0.260826	0.519619
CUL5	-0.0386783	-0.0828788	0.00641002	-0.130286	-0.0526013	-0.156708	0.0146483	-0.172774	-0.188531	-0.376979	-0.671661	-0.45223	0.00135258	0.0983792	0.0662628	-0.071547	0.409012	0.410616	0.365457	0.379983	0.166739	0.396659	0.325085	0.104933	0.289403	0.110015	-0.0948687
CUL7	-0.442233	-0.689015	-0.6625	-0.314149	-0.581219	-0.526772	-0.316221	-0.308803	-0.64486	-0.571817	-0.520084	-0.432885	NA	NA	NA	NA	NA	NA	NA	NA	NA	NA	NA	NA	NA	NA	NA
CUSTOS	-0.877118	-0.686337	-0.86185	-0.60468	-0.678431	NA	-0.425621	-0.786312	-0.558446	-0.537393	NA	-0.437613	NA	NA	NA	NA	NA	NA	NA	NA	NA	NA	NA	NA	NA	NA	NA
CUTA	0.0725042	0.131494	0.0832431	0.0606787	0.0686087	-0.046179	0.276212	-0.126066	-0.0608849	0.0987014	-0.104524	-0.000555123	-0.0537329	-0.132648	-0.110756	-0.0138122	0.448845	0.413755	0.32812	0.477025	0.102101	0.039763	-1.0472	-0.574411	-1.15012	-0.619685	0.504532
CUTC	0.244859	0.314066	0.261252	0.501018	0.240376	0.324364	0.105291	0.237494	0.22367	-0.0869554	-0.155023	0.00230311	0.0695118	0.208032	0.203331	-0.111333	0.543589	0.513991	0.243777	0.513238	0.614016	0.689659	0.615019	0.433796	0.33224	0.325848	0.501449
CWC15	-0.164722	-0.196387	-0.00953631	-0.201499	-0.137884	-0.315779	-0.185953	-0.198633	-0.192443	-0.120125	-0.19674	-0.238133	-0.123675	-0.0828017	-0.0962739	0.19649	0.185312	0.233366	0.516046	0.344379	NA	NA	NA	NA	NA	NA	-0.0114886
CWC22	-0.424656	-0.444612	-0.352339	-0.363888	-0.297259	-0.359142	-0.201786	-0.216632	-0.204167	-0.183742	-0.13819	-0.102763	0.213834	0.131388	0.197053	0.212377	0.37399	0.0110011	0.276339	0.170394	NA	NA	NA	NA	NA	NA	-0.0484837
CWC27	-0.114786	-0.0978154	-0.127644	-0.245466	-0.382501	-0.344086	-0.171549	-0.121	-0.217845	-0.384131	-0.703383	-0.323252	-0.144056	0.0676441	0.0900659	0.123141	-0.0317177	0.159502	0.0658101	-0.01785	-0.671016	-0.253344	-0.284731	-0.938651	-1.02119	-0.599031	0.0739742
CWF19L1	0.0440396	-0.0107888	-0.0572884	0.211139	-0.0315974	-0.0234233	-0.136928	-0.203012	0.0348626	-0.313908	-0.282825	-0.459008	0.271907	0.280407	0.428371	0.366622	0.512905	0.409179	0.461378	0.402101	0.0852413	-0.0422246	0.0884423	-0.0331975	0.0168603	-0.17427	0.025307
CXCR4	0.176627	0.121549	0.105095	0.269566	0.0686087	0.16728	NA	-0.854549	-0.924417	-0.748161	-0.751395	-0.512136	-1.1182	NA	-0.370181	-0.501386	-1.03043	-1.18929	-0.495314	-0.689127	-0.139651	-0.10959	-0.449824	-1.35668	-1.33557	-1.34302	NA
CXorf56	NA	-0.78302	NA	NA	NA	NA	NA	NA	NA	NA	NA	NA	-0.364186	-0.274497	-0.416987	-0.41619	-0.532695	-0.428976	-0.475158	-0.211276	NA	NA	NA	NA	NA	NA	-0.406308
CXXC1	0.0440396	0.0558965	0.0381993	0.065389	0.19017	-0.107835	-0.274716	-0.19114	-0.321634	-0.48361	-0.388395	-0.447115	-0.469648	-0.389481	-0.26313	-0.0910366	0.256831	0.113992	0.172356	0.19946	NA	NA	NA	NA	NA	NA	-0.3554
CYB561D2	-0.226685	-0.246115	-0.204438	0.0355136	-0.160963	-0.0888735	-0.261915	-0.361851	-0.387791	-0.480596	NA	-0.38993	-0.769847	-0.894876	-0.863056	-0.279539	-0.366088	-0.373708	-0.246849	-0.40665	NA	NA	NA	NA	NA	NA	-0.461644
CYB5A	-0.202152	-0.196387	-0.197322	-0.470294	-0.0759534	-0.209562	-0.390625	-0.444852	-0.359456	-0.277041	-0.216994	-0.210497	0.349035	0.183655	-0.126878	-0.0069843	0.0115482	0.0256546	0.0418915	0.0717407	-0.191676	-0.850962	-0.168875	0.0317922	-0.167175	-0.0548497	0.270063
CYB5B	0.304127	0.271767	0.322825	0.191499	-0.129895	-0.137255	0.18423	0.412586	0.372812	-0.347506	-0.523482	-0.191193	NA	NA	0.482506	NA	NA	NA	0.248161	0.344924	0.393333	0.435478	0.521208	0.35895	0.360242	0.408614	0.437065
CYB5R1	0.391086	0.424072	0.496741	0.0933451	0.256695	0.275689	0.0455377	0.0149069	0.12704	-0.0516983	0.246718	-0.0147714	0.243962	0.0344431	0.190249	0.22476	0.839591	0.712836	0.815584	0.765956	-0.316091	0.0371152	-0.264093	-0.240683	-0.101698	-0.297216	0.458995
CYB5R3	0.546129	0.542348	0.557138	0.602505	0.491499	0.48918	0.757357	0.658041	0.588012	0.526273	0.39912	0.34529	0.571691	0.573894	0.731524	0.713262	0.949434	0.938026	0.905292	0.913637	-0.402942	-0.624131	-0.513732	-0.60478	-0.485049	-0.432628	0.561346
CYBA	-0.274822	-0.23806	-0.221835	-0.171316	-0.199897	-0.306419	-0.342351	-0.385983	-0.420071	NA	-1.00829	NA	-1.11211	-0.612319	0.0800798	-0.203205	-0.267169	0.194618	-0.421254	0.256791	-0.759373	-0.684466	-0.427192	-0.916181	-0.902915	-0.98287	-0.0643197
CYBB	NA	-0.537932	-0.83793	-0.900824	-0.733059	NA	NA	NA	NA	NA	NA	NA	-0.430395	-0.392139	-0.409961	NA	-0.817602	-0.868312	-0.644943	-0.954052	-1.08655	-0.386502	-0.605343	-0.705666	-0.831305	-1.08532	NA
CYBC1	0.0475821	0.0166181	0.0494742	-0.7109	-0.462782	-0.490128	-0.0612934	-0.385983	-0.349659	-0.427287	-0.366963	-0.381085	0.00637473	0.231267	0.130433	0.143817	0.193273	0.00596137	0.17984	0.203943	NA	NA	NA	NA	NA	NA	0.168442
CYC1	0.550911	0.560561	0.566641	0.0848123	0.217827	0.312233	0.163367	0.304193	0.247153	0.532888	0.227344	0.137021	0.626559	0.684863	0.582302	0.560225	0.773123	0.830968	0.822569	0.807787	0.0407465	0.0650916	-0.0914961	0.0948589	-0.0707471	-0.0283434	0.00410646
CYCS	0.156461	0.0439421	0.165689	-0.122395	-0.0108333	-0.106598	0.561902	0.279999	0.448606	0.457695	0.45701	0.364329	0.789232	0.874251	0.951596	0.849516	1.24117	1.02134	1.08183	1.09837	0.429485	0.0271844	0.0679068	0.361684	0.299906	0.491452	NA
CYFIP1	-0.3058	-0.232199	-0.28716	-0.269666	-0.181566	-0.323588	NA	-0.741936	-0.912184	NA	NA	NA	-0.329585	-0.301799	-0.639234	0.491617	-0.413026	NA	-0.653255	-0.498813	-1.06014	-0.79494	-0.592683	-0.751474	-0.779205	-1.13383	0.00573663
CYFIP2	0.744836	0.75345	0.72389	0.742037	0.639425	0.663301	0.389539	0.320735	0.477518	0.460878	0.442673	0.541843	0.922962	0.945754	1.02236	0.93365	1.19375	1.12361	1.05447	1.12827	-0.000523389	0.149956	0.122249	0.164017	0.10437	0.117581	0.581567
CYLD	-0.186743	-0.115852	-0.183565	0.113049	-0.107885	-0.207361	-0.936078	-0.748564	-0.745665	-0.854698	-0.806009	-1.04324	0.266749	0.288696	0.297276	0.287015	0.590945	0.500879	0.29974	0.436607	0.529315	0.40805	-0.0698509	0.233362	0.267938	0.273515	0.339042
CYP20A1	0.0268043	0.0648042	-0.13399	0.159936	0.078481	-0.0774705	0.0194136	-0.367707	-0.0342674	-0.269203	0.0202398	-0.345867	-0.191593	0.0647644	0.0937816	0.243009	0.447538	0.414578	0.497273	0.390865	-0.459441	-0.740242	-0.517579	-0.878632	-0.627161	-0.301666	-0.0682851
CYP51A1	NA	NA	NA	NA	NA	NA	NA	NA	NA	NA	-1.07838	-0.929059	-0.118623	0.0361937	0.018267	-0.211896	-0.767086	NA	-0.678799	-0.443768	NA	NA	NA	NA	NA	NA	-0.71954
CYTH1	0.438812	0.462789	0.408099	0.412654	0.271986	0.268024	0.387522	0.491954	0.602014	0.287686	0.295128	0.206678	0.0664876	0.292886	0.230193	0.0851044	0.515255	0.492546	0.435359	0.515332	0.514931	0.652989	0.481535	0.272895	0.321689	0.365693	0.329395
CYTH2	-0.957462	NA	NA	NA	-0.558946	NA	-0.669956	NA	-0.675767	-0.697412	-0.463461	-1.16285	-0.933864	-0.74691	-0.725113	NA	-0.68925	-0.741022	-0.511404	-0.616091	NA	NA	NA	NA	NA	NA	-0.499807
CYTH4	-0.670234	NA	-0.526016	-0.706159	-0.742984	NA	-0.891779	-0.604139	-0.504377	NA	NA	NA	-0.8134	-0.609388	-0.79536	-0.168118	-0.109684	-0.354921	-0.252225	-0.233157	-0.261513	-0.602215	-0.23194	-0.530024	-0.528525	-0.27333	-0.18552
CYTIP	-0.402575	-0.267562	-0.25759	-0.309669	-1.00721	-0.647616	-0.123181	-0.219655	-0.0976898	-0.789304	-0.7947	-0.318358	-0.175661	-0.178136	-0.754902	-0.208665	-0.0257471	0.0959317	0.0915769	0.0939677	0.0532037	0.169118	0.0878151	-0.594311	-0.352969	-0.602663	-0.154269
CZIB	0.474627	0.419665	0.430579	0.147363	0.14761	0.130002	-0.0010632	0.291105	0.143801	0.30558	0.303371	0.252069	0.541196	0.39521	0.369782	0.381255	0.494818	0.489805	0.377199	0.4767	0.243573	0.299524	0.235096	0.218623	0.084076	-0.00377218	0.277632
D2HGDH	-0.761594	-0.871409	-1.21211	-1.36549	-1.38281	NA	NA	NA	NA	NA	NA	NA	-0.404249	-0.276546	-0.195557	NA	-0.203055	-0.379788	-0.3071	-0.228994	-0.650025	-0.655963	-0.381785	-0.550589	-0.663447	-0.657758	-1.01218
DAD1	0.102166	0.0831377	0.170678	0.147363	0.0600793	0.00207466	0.0326282	0.0745861	-0.0235696	0.205526	0.0830106	0.00523533	0.0914043	0.058833	0.273136	0.279357	0.240073	0.119874	0.291966	0.15149	NA	NA	NA	NA	NA	NA	-0.0971714
DAP3	-0.519039	-0.299253	-0.489878	-0.557361	-0.610055	-0.557216	-0.263447	-0.342177	-0.0417831	0.102171	0.190339	0.075038	0.100472	0.101016	0.160183	0.397902	0.226617	0.0518633	0.418234	0.197983	-0.189109	-0.476991	-0.235309	-0.126899	-0.0304264	-0.146591	0.380271
DAPP1	NA	-1.05829	NA	-1.17458	-0.946315	-0.929007	-0.800664	-0.566099	NA	-0.539316	-0.820022	-0.510207	-0.358515	-0.234606	-0.318665	-0.517657	-1.08978	-0.570726	-1.07972	-0.760945	NA	NA	NA	NA	NA	NA	-0.548115
DARS	0.737755	0.747532	0.760436	0.82844	0.713147	0.702109	0.679504	0.764798	0.650973	0.72069	0.722769	0.796517	NA	NA	NA	NA	NA	NA	NA	NA	NA	NA	NA	NA	NA	NA	NA
DARS2	0.137108	0.224984	0.297588	0.0772742	0.0550687	0.0172742	0.0900384	0.2412	0.301035	0.0799117	-0.0985308	0.0978119	0.409633	0.460103	0.559455	0.348416	0.606956	0.541766	0.580016	0.40723	0.0977146	-1.06916	0.0463536	0.0921568	-0.176282	0.0631016	-0.336399
DAXX	-0.0345596	-0.0807429	-0.0847724	0.0257506	-0.223377	-0.194732	-0.267851	-0.118525	-0.400862	-0.640844	-0.66984	-0.491395	0.196762	0.147338	0.163789	-0.366546	-0.0258953	0.00646241	0.0435975	-0.0377647	NA	NA	NA	NA	NA	NA	-0.000462675
DAZAP1	0.599297	0.611486	0.57486	0.449474	0.563591	0.619341	0.622132	0.599635	0.630804	0.326393	0.361148	0.37276	0.757283	0.658441	0.711191	0.741954	0.691199	0.691389	0.684017	0.67117	0.437298	0.388025	-0.148162	0.239014	0.251281	0.18009	0.4198
DBI	1.08377	1.08598	1.05535	0.595842	0.571777	0.599678	0.192765	0.172837	0.131642	0.575466	0.516436	0.566683	0.881769	0.610398	0.719493	0.503596	0.753608	0.513323	0.530336	0.639257	-0.347345	-0.745879	-0.555197	0.505541	-0.239334	-0.0646042	1.95443
DBN1	-0.711695	NA	-0.767633	-0.880416	NA	NA	-0.965338	-1.22621	-0.859048	NA	-1.10522	-1.22146	-0.1056	-0.144241	0.089375	-0.530764	-0.501247	-0.545948	-0.432401	-0.684591	-0.807446	-0.552746	-1.20533	-0.633058	-0.506004	-0.82125	-0.699357
DBNL	0.969958	0.992876	1.02342	0.958354	1.21495	1.1947	0.783049	0.704835	0.674093	0.71265	0.749073	0.728857	NA	NA	1.12942	0.873974	NA	NA	0.960012	1.04299	1.22109	1.11559	1.31212	1.062	1.01091	1.03232	1.37374
DBR1	0.222925	0.205516	0.116778	0.0398828	0.107446	0.173379	0.147181	-0.275192	-0.186234	-0.165974	0.0783618	0.34529	0.362962	0.345609	0.488932	0.231741	0.270048	0.334299	0.201762	0.267893	0.074581	-0.0649295	0.396659	-0.0117387	0.14785	-0.126265	0.271421
DBT	-0.00580379	0.128074	0.0381993	0.137963	0.0254883	-0.0024881	-0.0213857	0.12539	0.0446633	-0.14786	-0.336848	-0.181604	-0.138427	-0.1481	-0.109472	-0.134418	0.58619	0.320374	0.432676	0.447561	-0.0986791	-0.770852	-0.527189	-0.536892	-0.400989	-0.426098	NA
DCAF1	-0.196675	-0.372228	-0.19987	-0.135762	-0.326529	-0.0912939	-0.104466	-0.383002	-0.359456	-0.274697	-0.530438	-0.037439	0.338715	0.334838	0.279865	0.326178	0.327089	0.312271	0.206607	0.270061	NA	NA	NA	NA	NA	NA	0.39334
DCAF11	-1.17155	-0.988217	-1.07383	-0.916769	-0.9178	-0.706655	NA	NA	NA	NA	NA	NA	-0.256704	-0.0884215	-0.0164961	-0.436959	-0.52861	-0.501166	-0.536776	-0.139524	NA	NA	NA	NA	NA	NA	-0.771932
DCAF13	-0.618191	-0.564356	-0.692402	-0.236032	-0.432652	-0.334258	-0.0269781	-0.259817	-0.198432	-0.3269	-0.146818	-0.372912	0.210194	0.388041	0.298451	0.45076	0.22222	0.282409	0.13014	0.17522	-0.756858	-0.344633	-0.803114	-0.469703	-0.469898	-0.461547	-0.657329
DCAF7	-0.480053	-0.46431	-0.675129	0.1098	0.0433486	-0.00979974	-0.337918	-0.336242	-0.354939	-0.726269	-0.342329	-0.408786	0.250343	0.121173	0.163461	-0.0212523	-0.102758	-0.0559496	-0.0825208	0.0802431	-0.431829	-0.779928	-0.41994	-0.300421	-0.43134	-0.81101	-0.0395348
DCAF8	-0.807639	-0.5411	-1.01292	-0.776103	-0.78221	-0.904743	-0.768115	-0.373079	-0.689925	NA	NA	-0.944814	-0.00966366	-0.158947	0.0529428	-0.0221366	0.0474433	0.162696	-0.00546276	0.0298748	-1.15262	-0.674309	-0.74772	-0.87651	-0.718939	-1.03889	-0.209847
DCAKD	-0.987138	-1.44329	-0.822136	-0.725981	-0.534272	-0.643566	NA	-1.0494	-0.834638	-1.00353	NA	-0.894801	-0.4086	-0.346811	-0.233357	-0.465471	0.113036	0.00893623	-0.00255347	0.00485107	NA	NA	NA	NA	NA	NA	-0.489249
DCD	0.338926	0.291196	0.302647	0.220387	0.206874	0.0596693	0.412655	0.263617	0.292843	0.696344	0.690315	0.745616	0.0715087	NA	-0.54135	-1.16364	NA	-1.03274	-0.590187	NA	NA	NA	NA	NA	NA	NA	-0.242288
DCK	0.248568	0.247265	0.291804	0.181927	0.0742683	-0.0414308	0.122645	0.0972031	0.100429	-0.182222	-0.043031	-0.00796825	0.941789	0.625521	0.7294	0.657583	0.468725	0.565937	0.396363	0.549872	0.427726	0.296384	0.216995	0.260132	0.338725	0.331003	1.00666
DCP1A	-0.0982428	-0.392002	-0.166697	-0.764278	-0.432652	-0.334258	0.13415	-0.0547326	0.0969869	0.334976	0.140535	0.120722	0.344486	0.244451	0.198897	0.264175	0.286375	0.265182	0.21458	0.231562	-0.255511	-0.209203	-0.236487	-0.00116466	-0.104895	0.0911143	-0.36457
DCP1B	-0.841087	-0.667255	-0.769658	-1.17028	NA	NA	-0.44686	-0.647289	-0.744534	NA	NA	-0.779307	-0.248597	-0.308837	-0.406614	-0.460783	-0.298322	-0.208198	-0.209938	-0.450722	-0.701901	-0.41725	-0.353692	-0.8487	-0.766137	-0.65913	-0.430868
DCPS	0.550911	0.528471	0.592073	0.250007	0.371024	0.340497	0.686873	0.415002	0.369709	0.527973	0.388119	0.493489	0.567386	0.456775	0.432114	0.30678	0.688949	0.755626	0.634715	0.563019	0.737105	0.817272	0.831488	0.543745	0.671022	0.569161	0.536181
DCTD	-0.896166	-0.437876	-0.565442	-0.331264	-0.613542	-0.704472	-0.842609	-0.649727	-0.374694	-0.452156	NA	NA	0.105131	0.0107012	-0.264085	-0.242529	-0.475354	-0.401265	-0.76611	-0.403752	NA	NA	NA	NA	NA	NA	0.287935
DCTN1	0.626724	0.670742	0.664911	0.690516	0.575605	0.679684	0.57511	0.607567	0.557863	0.418828	0.373666	0.471709	0.823712	0.824069	0.925191	0.687847	0.861403	1.07708	0.640873	0.823455	0.753266	0.881114	0.882713	0.668462	0.689659	0.674149	1.12923
DCTN2	0.576682	0.555869	0.598862	0.449474	0.446125	0.428105	0.537025	0.728501	0.577338	0.904199	0.690315	0.770689	0.814297	0.852754	0.886579	0.66524	0.844591	0.786584	0.800491	0.772888	0.690565	0.357012	0.579789	0.615893	0.477533	0.594604	0.353524
DCTN3	-0.281689	NA	-0.358228	-0.632232	-0.333455	-0.465655	-0.756536	-0.907123	-0.847591	-0.491807	-0.51421	-0.730347	0.161	0.176581	0.0419611	0.164469	-0.16344	0.105099	-0.130833	0.0969148	0.200913	0.33168	0.285977	0.0952497	0.0852413	0.0300555	0.332375
DCTN4	-0.100754	-0.23806	-0.221835	-0.0585445	-0.211097	-0.179841	-0.0802351	0.103141	0.041823	-0.277041	-0.413977	-0.150644	0.172436	0.257835	0.0746675	0.174425	0.161726	0.19185	0.00735834	0.0789121	0.268134	0.256938	0.230022	-0.0278834	-0.010535	0.0532037	0.596649
DCTN5	-1.15588	-1.10585	-1.20004	-0.924142	-0.831256	-1.12639	-0.572342	-0.997096	-0.845333	-0.277041	-0.140286	-0.487167	-0.773664	NA	NA	-0.384923	-0.279015	-0.369139	-0.474914	-0.63656	-0.166289	-0.220565	-0.968407	-0.198236	-0.449162	-0.0924235	0.143857
DCTPP1	-0.133583	-0.253513	-0.123598	-1.14705	NA	NA	-0.614738	-1.23654	-0.6603	0.28371	0.0875749	0.158413	0.756736	0.718446	0.576281	0.341662	-0.357532	-0.27701	-0.550971	-0.351858	-0.0995413	0.0215119	0.103195	0.387272	0.302428	0.385544	0.16745
DCUN1D1	-0.202152	-0.105214	-0.0325469	-0.0129173	-0.033349	-0.0564591	-0.401861	-0.16278	-0.160424	-0.439549	-0.395218	-0.430926	-0.166707	0.0425972	-0.0650908	-0.0807484	0.247298	0.252604	0.236887	0.217773	-0.0369259	-0.508087	-0.963422	-0.0328196	-0.391665	0.0162953	0.540582
DCUN1D5	NA	NA	-1.36243	-0.420675	NA	NA	NA	-0.442251	-0.706682	-0.361988	-0.474705	-0.578877	0.20493	-0.114812	-0.138434	0.0269122	-0.184296	-0.202043	-0.276877	-0.210994	-0.874893	-0.213433	-1.12478	-0.200765	-0.234227	-0.129705	-0.808949
DCXR	0.669978	0.652358	0.661253	0.641616	0.71972	0.634222	0.650412	0.505462	0.372812	0.380807	0.321431	0.529311	0.429021	0.329184	0.450159	0.367838	0.6268	0.803046	0.629375	0.781246	0.617989	0.674149	0.579001	0.483678	0.503618	0.459498	1.03135
DDA1	-0.62226	-0.795192	NA	-0.996431	-0.796573	-1.0437	-0.845684	NA	-1.0207	-0.523213	-0.891898	-0.704271	-0.353351	-0.510257	-0.433746	-0.134986	-0.640964	-0.418189	-0.527379	-0.270791	NA	NA	NA	NA	NA	NA	-0.297704
DDAH2	-0.439877	-0.320236	-0.246656	-0.585161	-0.966065	-0.574637	-0.304453	NA	-0.600275	-0.0687949	-0.228138	-0.0983096	-0.296084	-0.485807	-0.3086	-0.830552	0.00887706	-0.206516	0.116471	-0.0948542	-0.000936892	0.0553725	-0.023574	-0.207066	-0.171516	-0.276711	0.415271
DDB1	0.84496	0.828509	0.876883	0.961946	0.873346	0.833707	0.99048	0.759443	0.896708	0.862669	0.729342	0.784824	1.60811	1.5448	1.57719	1.46063	1.20874	1.16067	1.14288	1.2696	0.854925	0.837141	0.623365	0.932454	0.876612	0.892957	0.347995
DDB2	-0.105688	-0.125934	-0.19987	-0.438165	-0.0942701	0.101548	-0.405942	-0.383002	-0.478555	-0.44365	-0.587791	-0.357672	0.217093	0.570574	0.508905	0.339719	0.267637	0.115159	0.205266	0.226493	NA	NA	NA	NA	NA	NA	0.759173
DDHD1	NA	NA	NA	NA	-1.1199	NA	-0.851268	NA	-0.931582	NA	NA	NA	0.0381727	-0.173148	0.336236	-0.181072	-0.709455	-0.57585	-0.733637	-0.646416	NA	NA	NA	NA	NA	NA	-0.979808
DDI2	0.286334	0.310312	0.31427	0.269566	0.201586	0.186634	0.28745	0.469445	0.504823	0.0385883	-0.0408399	-0.0963305	0.223911	0.150038	0.198091	0.175121	0.227102	0.308957	0.313641	0.336284	0.00234383	-0.128094	0.166473	0.061494	-0.0974372	-0.0278834	0.200254
DDOST	0.367551	0.302577	0.28182	0.764268	0.58551	0.586096	0.753705	0.700861	0.905666	0.753151	0.722769	0.695779	0.787815	0.903526	0.980395	0.945807	0.81618	0.75477	0.751729	0.729614	0.215229	-0.33627	-0.130293	0.218283	-0.0459199	0.0825074	0.398731
DDRGK1	0.23988	0.26794	0.347	0.267516	0.415484	0.248666	0.0702343	0.0380582	0.0986228	0.0814599	0.290021	-0.0401721	-0.133976	0.158291	0.17413	0.0797071	0.623447	0.666538	0.687848	0.638299	0.367038	0.519651	0.35309	0.223969	0.334393	0.215229	0.0209633
DDT	0.666587	0.691709	0.677976	0.459874	0.550718	0.572381	0.528694	0.574909	0.518236	0.429608	0.344442	0.440633	0.924874	0.799477	0.849801	0.677462	0.438784	0.66374	0.259216	0.265725	-0.203622	-1.31878	-0.681292	-0.281264	-0.897602	-0.252385	1.01296
DDX1	1.18601	1.11455	1.0927	1.00447	1.00167	0.916331	1.25938	0.992241	1.15621	1.0052	0.933098	1.13421	1.27835	1.21522	1.27231	1.27405	1.56999	1.54305	1.36609	1.49874	0.795124	0.890986	0.746533	0.609496	0.593678	0.556495	0.597652
DDX10	NA	NA	-1.04458	-0.491692	-0.892649	-0.816969	-0.208381	-0.355562	-0.479982	-0.516932	-0.472601	-0.629764	0.0808602	0.252628	0.0245134	0.178095	-0.196919	-0.0614555	-0.0690916	-0.151843	NA	NA	NA	NA	NA	NA	-0.80169
DDX17	1.64267	1.69186	1.59692	1.70651	1.60381	1.53787	1.56579	1.38086	1.35911	1.48475	1.54935	1.3828	1.43597	1.32937	1.54568	1.60987	1.84963	1.96171	2.04071	1.84407	0.540867	0.683624	0.540867	0.268311	0.295994	0.109075	0.954253
DDX18	0.28756	0.372887	0.374924	0.362738	0.417927	0.381139	0.630032	0.566997	0.659188	0.437096	0.37058	0.423875	0.93045	1.11904	1.08194	1.0121	1.04681	1.04961	1.01762	0.938906	NA	NA	NA	NA	NA	NA	0.17233
DDX19A	0.404108	0.389002	0.461147	0.283612	0.421529	0.302164	0.537025	0.37171	0.448606	0.364895	0.414237	0.409353	0.734571	0.780473	0.709459	0.792669	0.712765	0.700804	0.520116	0.741503	0.686681	0.763516	0.618692	0.548175	0.632177	0.609496	0.217776
DDX19B	0.0268043	-0.0390105	-0.00953631	-0.253024	-0.0393981	-0.237549	0.204383	0.261327	0.0768082	-0.0937811	0.0149739	-0.037439	NA	NA	NA	NA	-0.536775	-0.406536	-0.574198	-0.437421	NA	NA	NA	NA	NA	NA	0.819141
DDX20	-0.867769	-0.831018	-0.793192	NA	NA	NA	-0.339662	-0.743806	-0.482499	-0.202102	-0.388395	-0.383659	0.190079	0.264006	0.462365	0.263021	-0.209708	-0.162245	-0.0232708	-0.0857208	NA	NA	NA	NA	NA	NA	-0.533817
DDX21	0.543794	0.481513	0.523463	0.561256	0.368947	0.372266	1.39614	1.26576	1.36825	1.67939	1.60037	1.57843	1.39565	1.60783	1.51623	2.16828	1.1673	0.971303	1.061	1.02094	NA	NA	NA	NA	NA	NA	0.355498
DDX23	0.465668	0.491744	0.464332	0.641616	0.453935	0.436624	0.397566	0.287956	0.242176	0.230524	0.0952579	0.235421	0.715049	0.858526	0.801055	0.813852	0.803739	0.866519	0.882897	0.811685	NA	NA	NA	NA	NA	NA	-0.310324
DDX24	0.489595	0.571886	0.518785	0.438637	0.495544	0.462337	0.41767	0.447913	0.475111	0.351624	0.344442	0.426261	0.77984	0.919975	0.96478	0.938538	1.2812	1.17487	1.05536	0.961617	-1.18441	-0.72375	-0.87651	-0.992166	-0.356572	-1.06447	0.581097
DDX27	-0.0723199	-0.0647842	-0.0352458	0.19834	-0.0108333	-0.0796586	0.206509	0.212867	0.133484	0.300572	0.303371	0.261611	0.486141	0.647138	0.633064	0.796296	0.607917	0.615315	0.63076	0.556889	NA	NA	NA	NA	NA	NA	-0.121786
DDX28	-1.14869	NA	NA	NA	NA	NA	-0.51422	NA	-0.273733	-0.283223	-0.508088	-0.610553	-0.723671	-0.531486	-0.111292	-0.0930803	-0.0605455	-0.19118	-0.114418	-0.316369	-0.00664699	-0.32998	-0.811854	-0.202516	-0.511062	-0.105609	-0.20229
DDX31	-0.462474	-0.320236	-0.489878	-0.823658	-0.629612	-0.81981	-0.177117	-0.156146	-0.157365	-0.151589	-0.233393	-0.416796	-0.35511	-0.263239	-0.287589	-0.122335	0.143903	0.125355	0.0196174	0.105558	NA	NA	NA	NA	NA	NA	0.175865
DDX39A	0.531676	0.498988	0.524927	0.546472	0.459835	0.439269	0.864461	0.628411	0.674909	0.489472	0.65848	0.571163	NA	NA	1.04565	1.06085	NA	NA	NA	NA	-1.2301	0.0329174	-0.435568	-0.653477	-0.570545	-0.809595	0.917536
DDX39B	1.67535	1.72788	1.67312	1.47594	1.4361	1.41225	1.6854	1.71124	1.81129	1.49814	1.52169	1.64459	NA	2.12966	NA	2.09147	NA	2.51951	2.48433	2.42203	0.392537	0.4955	0.172004	0.298199	0.371909	0.249618	0.768802
DDX3X	0.561007	0.54657	0.541952	0.595842	0.639425	0.689922	1.04681	0.746804	0.919839	1.22108	1.24073	1.23194	1.28235	1.29917	1.4863	1.6833	1.18169	1.19506	1.15868	1.20999	0.615893	0.680062	0.617989	0.809607	0.812912	1.07383	0.336243
DDX3Y	-1.46289	-0.71624	NA	NA	NA	NA	-0.342351	-0.718373	-0.777983	NA	NA	NA	0.114589	0.183088	0.182105	0.104951	0.142203	0.193285	0.221858	0.137247	NA	NA	NA	NA	NA	NA	0.119222
DDX41	-0.124646	-0.253513	-0.0950422	-0.240922	-0.0734068	-0.196753	-0.00755973	-0.208914	-0.290141	-0.493993	0.160049	-0.265263	0.496353	0.461429	0.412562	0.495751	0.389441	0.455649	0.365083	0.545602	-0.875538	-0.820051	-0.823849	-0.651489	-0.68318	-0.750041	0.128895
DDX42	0.481738	0.484995	0.447951	0.521912	0.360147	0.36895	0.570856	0.740099	0.546534	0.592348	0.32429	0.329703	0.751365	0.817036	0.894888	0.833926	0.74032	0.840568	0.789396	0.783432	0.278012	0.319217	0.394824	0.27613	0.317866	0.0298451	0.264252
DDX46	0.634842	0.782036	0.710197	0.706659	0.733498	0.695404	0.43865	0.418963	0.414391	0.426886	0.561558	0.52369	NA	NA	1.00776	NA	NA	NA	0.981145	0.981199	NA	NA	NA	NA	NA	NA	-0.200903
DDX47	0.137108	0.154224	0.0584711	0.154221	0.0949935	-0.00661197	0.32746	0.345199	0.288161	0.333614	0.152836	0.180712	0.653368	0.629446	0.630248	0.666141	0.644913	0.633987	0.641654	0.506776	NA	NA	NA	NA	NA	NA	0.898362
DDX49	-0.961216	NA	NA	NA	NA	NA	-0.652617	-0.479802	-0.363826	-0.691595	-1.31978	NA	-0.489721	0.286914	0.189038	-0.0864418	-0.108893	0.0406966	-0.0945114	-0.0980259	NA	NA	NA	NA	NA	NA	0.878793
DDX5	0.84039	0.783152	0.80288	0.93931	0.70321	0.692624	1.34933	1.11451	1.20478	1.19734	1.22989	1.18615	2.04015	2.11596	2.31137	2.56638	1.81554	1.9394	2.10377	1.99608	-0.134911	0.0322896	-0.0127534	-0.053332	0.00142399	-0.10959	0.865945
DDX50	-0.219627	-0.408775	-0.379461	-0.181114	-0.248771	-0.623249	0.204383	-0.393544	-0.00631665	0.0578624	0.0502455	-0.0674227	0.545291	0.66448	0.520036	0.636101	0.330616	0.348565	0.534196	0.427642	NA	NA	NA	NA	NA	NA	0.188225
DDX51	-1.18178	-0.672724	-0.750766	-0.348268	-0.753856	-0.564371	-0.208381	-0.3513	-0.206267	-0.434734	-0.831635	-0.69552	0.438582	0.414328	0.349874	0.309646	0.0980215	0.0832984	0.0791422	-0.0165278	NA	NA	NA	NA	NA	NA	-0.120018
DDX52	-0.424656	-0.436112	-0.393646	-0.406378	-0.457693	-0.420922	-0.32173	-0.311064	-0.0342674	-0.251444	0.0259386	-0.0885705	-0.00753696	0.219416	0.039139	0.0219056	0.259157	0.129442	0.19636	0.25364	NA	NA	NA	NA	NA	NA	-0.485708
DDX54	-0.343604	-0.413252	-0.415567	-0.461053	1.70995	1.36137	-0.0333952	-0.244641	-0.299298	0.0913546	-0.0647188	0.124486	NA	NA	0.307415	0.576728	NA	NA	NA	NA	NA	NA	NA	NA	NA	NA	0.450017
DDX55	-0.360268	-0.433527	-0.50518	-0.300361	-0.795123	-0.688991	-0.604659	-0.402525	-0.192443	-0.316293	0.128907	0.0804242	-0.122894	0.032941	-0.0010448	-0.00243395	0.0882909	0.111037	0.246044	0.122356	NA	NA	NA	NA	NA	NA	0.321476
DDX56	-0.452547	-0.59426	-0.494903	-0.943334	-0.379409	-0.638568	-0.0724617	-0.208914	-0.321634	0.161947	0.146877	0.109598	0.414825	0.30229	0.360054	0.521878	0.435222	0.323042	0.324791	0.347783	NA	NA	NA	NA	NA	NA	-0.216864
DDX58	0.140852	0.197474	0.162256	0.261957	0.227269	0.264264	0.383083	0.469445	0.358424	0.236571	-0.279991	-0.037439	-0.269596	-0.333402	-0.217064	0.220261	0.633285	0.533715	0.583382	0.601044	0.741098	0.633069	0.28316	0.637302	0.470584	0.464103	0.226159
DDX59	NA	NA	NA	NA	NA	NA	-1.15436	NA	-0.791161	-0.520246	0.489575	-0.196522	-0.343745	-0.260106	-0.53781	-0.830034	-0.5081	-0.400622	-0.544669	-0.40864	NA	NA	NA	NA	NA	NA	-0.56665
DDX6	0.712471	0.776209	0.669609	0.920943	0.626359	0.611158	0.511639	0.469445	0.646934	0.625047	0.588898	0.526349	1.16142	1.3197	1.26112	1.08452	0.970442	1.12138	0.978484	0.95878	0.658531	0.255328	0.109075	0.718996	0.690565	0.643729	0.606435
DDX60	0.0615026	-0.0526042	0.0584711	0.0971502	0.0600793	-0.0535808	0.391268	0.396172	0.491828	-0.198318	-0.178068	-0.139745	0.555176	-0.408855	0.200072	0.244653	0.776796	0.696509	0.673874	0.718645	-0.975218	-0.733374	-0.84895	-0.745879	-0.717802	-0.730122	-0.256763
DECR1	1.00448	1.06175	1.05535	1.02105	0.865167	0.807923	1.02325	1.08667	0.919839	0.640935	0.635974	0.646506	1.00091	0.847334	0.775381	0.773775	0.991509	0.989616	1.13003	0.960495	0.743323	0.726286	0.674796	0.664781	0.542283	0.464667	0.415959
DEF6	0.822683	0.837183	0.923162	0.730259	0.740253	0.682348	0.376692	0.423419	0.266943	0.415902	0.383022	0.37276	0.594209	0.692804	0.660626	0.656746	0.777399	0.758306	0.790856	0.808402	0.793621	0.760101	0.708122	0.548858	0.63555	0.567352	0.856496
DEFA1B	1.99778	1.94831	1.85574	1.57969	2.28508	1.93136	0.0549411	-0.198633	-0.10612	0.246861	0.249528	0.249613	NA	NA	NA	NA	NA	NA	NA	NA	NA	NA	NA	NA	NA	NA	-0.0154306
DEFA3	-0.222989	-0.323494	-0.229162	-0.528924	-0.17822	-0.192972	NA	NA	NA	NA	NA	NA	NA	-1.16929	-1.07811	-0.218909	NA	-0.589223	-0.0578784	-0.200163	NA	NA	NA	NA	NA	NA	NA
DEGS1	NA	-0.992787	NA	-0.773829	NA	NA	NA	-0.612057	NA	NA	NA	NA	-0.526179	-0.88319	-0.829163	-0.602239	-0.328563	NA	-0.428742	-0.269622	NA	NA	NA	NA	NA	NA	-0.144838
DEK	0.88124	0.922124	0.935787	0.835282	0.760055	0.868268	0.624865	0.60489	0.710131	0.581285	0.50264	0.505618	1.4077	1.41082	1.5374	1.39666	1.36338	1.28458	1.50909	1.3935	-0.891885	-0.594759	-0.422167	-0.98579	-1.08348	-0.817884	0.706263
DENND1C	0.0877647	0.139177	0.0750991	-0.105205	-0.0547128	-0.122487	-0.49165	-0.439846	-0.279323	-0.454795	-0.753737	-0.911984	0.239796	0.251808	0.29962	0.200603	0.539129	0.317751	0.43869	0.542541	-0.253069	-0.0887987	-0.358598	-0.432374	-0.425292	-0.384424	0.112061
DENND2D	0.0149253	-0.003049	-0.0293649	-0.0884945	-0.220665	-0.0796586	-0.223948	-0.236913	-0.228735	-0.595816	-1.05258	-0.639568	NA	NA	NA	-0.252626	0.627851	0.604359	0.655452	0.693137	NA	NA	NA	NA	NA	NA	0.253106
DENND4A	-0.814831	-0.88312	-0.806364	NA	NA	NA	-1.20297	NA	NA	-0.66194	NA	NA	-0.24949	0.0385572	0.0110339	0.310493	-0.227541	-0.283381	-0.568656	-0.334556	NA	NA	NA	NA	NA	NA	-0.889848
DENND4B	NA	-1.01243	-0.980516	NA	NA	NA	-0.825811	NA	-1.15245	NA	NA	NA	-0.182746	-0.202343	-0.480621	NA	0.0482942	0.0188468	-0.107938	-0.0787005	NA	NA	NA	NA	NA	NA	-0.57763
DENND4C	-0.114786	-0.499874	-0.327357	-0.373162	-0.329741	-0.214959	-0.821656	NA	-0.916473	-0.581949	-0.470606	-0.635073	0.0416188	0.0518844	-0.036511	-0.278408	0.392494	0.290163	0.368132	0.37293	-0.515371	-0.681292	-0.275768	-0.597187	-0.55393	-0.584798	-0.41573
DENR	0.0358475	0.231921	0.0803796	0.0295076	0.122406	0.140858	0.0804561	0.170458	0.0733824	-0.104959	-0.028828	-0.181604	0.198066	0.315961	0.25157	0.305347	0.318287	0.397773	0.296773	0.384011	-0.0828292	0.246085	0.572206	0.113955	0.369391	0.277415	0.957088
DERA	-0.124646	-0.309145	-0.146162	-0.314149	-0.382501	-0.326905	-0.157032	-0.301416	-0.0401179	-0.189604	-0.419272	-0.227942	0.236103	0.406458	0.374379	0.362696	0.340947	0.377799	0.251911	0.468271	0.0215119	-0.89588	-0.204586	-0.19652	-0.61271	-0.190831	0.0314215
DERL1	-0.49139	-0.571384	-0.53161	-0.443892	-0.323176	-0.224025	-0.16868	-0.39714	-0.292923	-0.144775	-0.35354	-0.321411	-0.451615	-0.196645	-0.0685261	-0.38739	-0.267679	-0.113829	-0.1219	-0.059565	NA	NA	NA	NA	NA	NA	-0.305878
DERL2	-0.588492	-0.480434	-0.551185	-0.119534	-0.47292	-0.388379	-0.401861	-0.208914	-0.296069	-0.863523	-0.624265	-0.479774	-0.878945	-0.748652	NA	-0.862966	-0.526244	-0.531515	-0.552101	-0.604173	NA	NA	NA	NA	NA	NA	0.327395
DERPC	-0.483203	-0.602327	-0.347397	-0.438165	-0.442953	-0.371683	NA	NA	NA	NA	NA	NA	NA	NA	NA	NA	NA	NA	NA	NA	NA	NA	NA	NA	NA	NA	NA
DESI1	NA	NA	NA	NA	NA	NA	-0.614738	NA	-1.1463	NA	NA	NA	-0.386579	-0.832034	-0.834679	-0.582157	NA	-0.587769	-0.73536	-0.724387	-1.26385	-0.402043	-0.664713	-0.710936	-0.558797	-0.525982	NA
DFFA	0.336164	0.306263	0.306741	0.113049	0.0923124	0.127093	0.0326282	0.207745	0.14195	0.13447	-0.00500659	0.112804	0.370077	0.327194	0.241478	0.188447	0.295753	0.325918	0.391682	0.415635	0.542283	0.305761	0.629193	0.420192	0.394824	0.301695	0.433347
DFFB	-0.409533	-0.441647	-0.623337	-1.34966	-0.984076	-0.789367	-0.291466	NA	-0.324306	-0.191561	-0.638303	-0.594183	NA	NA	NA	NA	-0.279766	-0.363855	-0.377885	-0.324738	NA	NA	NA	NA	NA	NA	-0.597308
DGAT1	-0.360268	NA	-0.521819	-0.69873	NA	NA	NA	NA	NA	NA	NA	NA	-0.959658	NA	-0.569994	0.160384	-0.213921	-0.530146	-0.326452	-0.593156	NA	NA	NA	NA	NA	NA	-0.965157
DGKA	1.13101	1.22938	1.21493	1.07867	1.12773	1.0768	0.919602	0.793151	0.82744	0.759243	0.65848	0.737683	0.983808	1.00383	1.11301	1.12277	1.92541	2.08677	1.72104	1.8237	1.33172	1.42768	1.27991	0.937611	1.06793	1.1023	0.471872
DGKB	0.106603	0.175066	0.174671	0.117388	0.0297733	0.0435935	0.0013809	-0.180545	-0.0718261	-0.220583	-0.264413	-0.278296	-0.00331065	-0.0700231	-0.0052213	NA	0.0851333	0.167731	-0.0879771	0.0250124	NA	NA	NA	NA	NA	NA	0.515587
DGKE	-1.38909	NA	NA	-0.84541	NA	-1.13802	-0.560206	-0.773818	-0.515361	-0.989771	NA	NA	-0.547471	-0.575232	-0.624367	-0.678465	-0.472235	-0.345761	-0.419597	-0.481807	NA	NA	NA	NA	NA	NA	-1.02146
DGKZ	-0.0664304	0.0959024	-0.0706254	0.156057	0.120444	0.0704819	-0.188405	-0.262926	-0.0179248	-0.748161	-0.377023	-0.419248	0.197857	0.28981	0.204516	0.0463133	0.537352	0.548899	0.406137	0.556426	-0.0914961	-0.0136194	-0.132908	-0.317767	0.0501609	-0.0497961	0.879661
DGLUCY	-0.592436	-0.467304	-0.566648	-0.0503505	-0.132407	-0.144872	-0.80328	-0.620469	-0.472401	-0.427287	-0.461121	-0.461885	-0.141143	-0.0739054	-0.438553	-0.168563	0.48293	0.561957	0.168687	0.180432	-0.0371607	-0.0745027	0.0773614	-0.253657	-0.245912	-0.207674	0.00969407
DGUOK	-0.0175707	-0.113476	8.57445e-05	-0.156113	-0.110377	-0.0438333	-0.405942	-0.481446	-0.10612	-0.915843	NA	NA	-0.0158969	-0.447936	-0.322529	-0.289526	0.179992	0.218591	0.312154	0.188645	NA	NA	NA	NA	NA	NA	0.0398681
DHCR7	-0.679719	-0.932865	-0.465954	-0.92658	-0.620804	-0.792409	-0.89589	NA	-0.85242	-0.835577	-0.830115	-0.811088	-0.450977	-0.195071	-0.111709	0.148582	-0.171034	-0.0302321	-0.110554	-0.291599	NA	NA	NA	NA	NA	NA	-0.067694
DHFR	NA	NA	NA	NA	NA	NA	-0.0706894	-0.023409	-0.036703	0.0987014	-0.0512967	0.0172023	0.325445	0.25895	0.23271	0.415629	NA	-0.840835	NA	NA	NA	NA	NA	NA	NA	NA	NA
DHODH	-0.964527	-0.672724	-0.511877	-0.890706	0.187534	-0.628616	-0.0252256	0.00633906	0.104937	0.0726195	0.180203	0.14864	-0.0854897	0.172889	0.303135	-0.00756701	-0.20073	-0.0058744	0.0303579	-0.0388124	0.0797971	0.0725245	0.0937051	-0.000936892	0.0200105	-0.0127534	-0.610141
DHPS	NA	NA	-1.06396	NA	NA	NA	-0.248387	-0.399236	-0.415923	-0.242594	-0.165089	-0.175262	0.220224	0.314734	0.327966	-0.0233367	-0.671282	-0.819675	-0.354903	-0.667608	-0.327811	-0.635965	-0.369144	-0.0455007	0.0960653	-0.0120993	-0.767054
DHRS1	-0.465506	-0.256542	-0.25759	-0.613794	-0.36238	-0.529329	-0.549343	-0.657969	-0.951894	NA	NA	NA	-0.116537	-0.180727	0.0193888	-0.233255	0.0117645	0.147524	0.354318	0.149434	-0.627459	-0.997502	-0.0564983	-0.380742	-0.946254	-0.64313	-0.00376549
DHRS11	-0.828068	NA	-0.765719	NA	NA	NA	NA	NA	-1.26597	-0.923785	NA	NA	-0.824303	-0.914324	-0.793294	-0.661534	-0.811681	-0.860166	NA	-0.501136	NA	NA	NA	NA	NA	NA	-0.871024
DHRS4	-0.336271	-0.0940001	-0.171193	-0.206427	-0.118929	-0.144872	-0.470605	-0.0441275	-0.0417831	NA	NA	NA	0.115361	-0.00336764	0.282905	0.276469	0.185792	0.237352	0.0897791	0.215381	0.0488519	-0.206507	-0.157995	-0.0989713	-0.207674	-0.653872	0.220424
DHRS7	0.25145	0.183867	0.251704	0.389374	0.0383149	-0.0511321	0.478843	0.611576	0.688036	0.435552	-0.195079	0.252069	0.125861	0.320546	0.322319	0.0723092	0.636241	0.455176	0.665739	0.559781	-0.976357	-1.11967	-0.0401381	-0.3612	-0.457994	-0.229158	0.129303
DHX15	0.958844	0.96593	0.954636	1.04613	1.02257	0.929999	1.14016	1.04239	1.16658	1.12836	1.15759	1.13421	1.15359	1.26027	1.35821	1.38621	1.38637	1.25993	1.20649	1.2696	0.841692	0.894186	0.862866	0.624274	0.711146	0.726286	0.315159
DHX16	-0.545735	-0.361377	-0.639446	-0.191952	-0.326529	-0.465655	-0.123181	-0.379749	-0.336097	-0.0106516	0.0737323	-0.0102226	0.11124	0.293173	0.29059	0.169728	0.0873109	-0.0220509	-0.0351319	0.0873006	NA	NA	NA	NA	NA	NA	0.231226
DHX29	-0.254415	-0.415897	-0.360124	-0.423655	NA	-1.0347	-0.180766	-0.311064	-0.165051	-0.274697	0.00867094	-0.0700657	-0.0521653	0.253616	0.241661	0.0729967	-0.0192759	-0.122047	0.0981346	0.0297834	NA	NA	NA	NA	NA	NA	-0.378582
DHX30	-0.153758	-0.14849	-0.125685	0.0802804	-0.0882343	0.0667383	0.424662	0.412586	0.465691	0.397605	0.508711	0.415578	NA	NA	NA	0.920309	NA	NA	NA	NA	-0.637777	-0.0317627	-0.604243	-0.364302	-0.248632	-0.305937	0.281498
DHX36	-0.0743381	-0.183633	-0.104985	-0.00695254	-0.451716	-0.526772	0.24261	0.163232	0.188509	-0.179763	-0.525599	-0.341652	0.155424	0.200501	0.351762	0.39583	0.323806	0.416852	0.310992	0.533103	-0.665315	-0.87651	-0.385289	-0.623551	-0.710354	-0.675956	-0.405346
DHX37	-0.706042	-0.910038	-0.473494	-0.516715	NA	-0.758403	-0.457424	-0.35939	-0.271054	NA	-0.746365	-1.07404	-0.00186063	0.120302	0.0670821	0.320003	0.171253	0.0952982	0.114692	0.0583091	NA	NA	NA	NA	NA	NA	0.185207
DHX38	-0.0880294	-0.0676865	-0.131145	0.12941	-0.110377	-0.179841	0.204383	0.14403	0.159772	0.156144	0.380346	0.103861	-0.0767415	0.0817652	0.162468	0.283601	0.465631	0.475011	0.307548	0.417938	0.0740968	0.0784423	0.0300555	0.100212	0.204671	0.0367687	-0.086481
DHX58	NA	NA	NA	-1.14705	NA	NA	-1.11571	-0.525655	-0.454484	NA	-1.24503	NA	-1.10469	-0.356157	-0.977682	-0.718416	-0.430238	-1.13477	-0.955153	-0.379664	NA	NA	NA	NA	NA	NA	-1.2063
DHX8	-0.677935	-0.309145	-0.606116	-0.232488	-0.148645	-0.436038	-0.0768544	-0.332109	-0.148687	-0.317499	-0.423899	-0.329704	0.365134	0.661096	0.664481	0.636575	0.536718	0.590524	0.526193	0.583732	NA	NA	NA	NA	NA	NA	-0.378872
DHX9	1.57564	1.65559	1.58019	1.51736	1.49115	1.47678	1.87083	1.58966	1.6388	1.86989	1.56831	1.833	2.06304	2.26221	2.49237	2.4633	2.78562	2.93496	2.85273	2.80253	-0.052714	-0.007535	-0.362767	-0.379259	-0.372798	-0.205683	0.522071
DIABLO	0.452552	0.506785	0.461147	0.127208	0.0337794	0.15219	-0.183071	-0.364091	-0.403056	0.0890006	-0.0647188	-0.000555123	0.491119	0.405414	0.447912	0.389929	0.622839	0.381689	0.774662	0.522829	0.946938	1.11994	1.18882	0.75668	1.08346	0.80711	0.403209
DIAPH1	1.18037	1.0971	1.15787	1.05667	0.918571	0.828057	0.813676	0.811221	0.848923	0.897704	0.887171	1.01624	1.25996	1.46195	1.43636	1.32771	1.9399	1.75441	1.46557	1.71696	0.99835	1.4183	1.19458	1.1803	1.14628	1.16066	0.675994
DIDO1	-0.0485679	-0.0891796	0.0404723	-0.0585445	-0.231541	-0.267497	-0.253123	-0.413726	-0.314734	-0.248619	-0.2086	-0.408786	0.30814	0.184025	0.322688	0.438422	0.638247	0.616553	0.546764	0.632451	NA	NA	NA	NA	NA	NA	0.224176
DIEXF	-0.609995	-0.763521	-0.754943	-0.611945	-0.766572	NA	-0.843924	-0.720946	-0.692575	-0.352672	-0.13819	-0.40654	NA	NA	NA	NA	NA	NA	NA	NA	NA	NA	NA	NA	NA	NA	NA
DIMT1	0.193801	0.213391	0.168359	-0.126981	-0.043041	-0.143031	-0.0486476	-0.0509035	0.0585846	0.43286	0.429374	0.484964	0.31913	0.563854	0.440359	0.489325	0.551185	0.445535	0.470347	0.555382	NA	NA	NA	NA	NA	NA	-0.045737
DIP2B	NA	NA	NA	-0.836311	-1.70051	-0.901821	-1.02534	-0.810225	-0.553957	-0.592085	-0.598121	-0.251646	0.0371625	0.209052	0.21926	0.132968	-0.69041	-0.735293	-0.916165	-0.0143322	NA	NA	NA	NA	NA	NA	-1.06713
DIS3	0.272724	0.23984	0.18221	0.349037	0.231322	0.114899	0.373343	0.309077	0.417225	0.281366	0.308556	0.247136	0.5316	0.688976	0.698008	0.623436	0.583962	0.678635	0.448322	0.588102	0.291171	0.476715	0.430039	0.369922	0.392537	0.35309	-0.435272
DIS3L	NA	-0.390116	-0.763447	NA	NA	NA	NA	-0.708685	NA	-0.118094	NA	0.00523533	-0.322066	-0.291235	-0.346698	-0.595289	-0.457177	-0.599958	-0.429192	-0.461973	-0.419414	-0.0834203	-0.573618	-0.640029	-0.53426	-0.485776	0.0876503
DIS3L2	NA	-0.841867	-0.597448	-1.39706	NA	NA	-0.214216	-0.373079	-0.312689	NA	NA	NA	-0.142173	-0.111311	0.0689008	-0.100745	-0.0168937	-0.0700157	-0.108227	-0.00882204	-0.528525	-0.902036	-0.777363	-0.864926	-0.626282	-0.513105	-0.744302
DKC1	0.817307	0.806466	0.827271	0.781005	0.796533	0.767246	1.02938	0.944131	1.09012	0.915877	0.861318	0.839884	0.7478	0.93943	0.866418	0.982522	1.34224	1.30057	1.32723	1.22368	-0.711392	-0.627459	-1.02475	-0.761642	-0.614341	-1.06157	0.789933
DLAT	0.615265	0.617852	0.624695	0.591234	0.596965	0.565965	0.663545	0.491954	0.57979	0.507124	0.514764	0.460718	0.571967	0.340846	0.653551	0.674433	0.978478	1.00387	1.12024	0.962676	0.584314	0.608852	0.564145	0.477533	0.438344	0.396659	-0.0612537
DLD	0.715816	0.68238	0.604507	0.538266	0.762933	0.762822	0.670738	0.692463	0.721574	0.763165	0.779237	0.607477	1.06912	0.991168	1.1335	1.08242	1.16908	1.16791	1.1684	1.14792	1.05037	1.12223	1.05265	0.821574	0.841692	0.820377	0.269332
DLG1	-0.831286	-0.653293	-0.681896	-0.292722	-1.11041	NA	-0.331649	-0.336242	-0.834638	NA	NA	-0.414336	-0.199823	-0.0496657	0.00513827	-0.212965	-0.10087	0.0333293	-0.0336381	-0.107467	0.0179825	-0.873939	0.236705	0.099145	0.0955494	0.143161	-0.557746
DLGAP4	-0.29904	-0.331006	-0.18962	-0.455542	-0.203101	-0.533789	-1.08109	-0.792698	-0.98542	-1.35167	-0.781581	-0.618948	-0.294458	-0.196461	-0.403041	-0.361351	-0.161787	-0.00344118	-0.412195	-0.186685	0.211335	-0.58649	0.145326	-0.0486744	0.0689792	0.00568527	-0.366626
DLGAP5	NA	NA	NA	NA	-1.02075	NA	-0.641081	NA	NA	-1.19239	NA	NA	0.0143563	0.083158	-0.0130454	0.183478	-0.61158	-0.601941	-0.543491	-0.529452	NA	NA	NA	NA	NA	NA	NA
DLST	0.858904	0.855953	0.835905	0.877612	0.846384	0.783316	0.692185	0.692463	0.677168	0.672846	0.775939	0.674196	0.974957	0.974742	0.983288	0.900069	1.06434	1.17487	1.07682	0.993266	1.28645	1.18316	1.32466	0.992603	0.992603	1.03813	0.308545
DMAC1	NA	-0.72414	NA	-0.505745	-0.864775	-0.737774	-0.841635	-0.848463	-0.78841	NA	NA	NA	-0.570434	-0.127274	-0.0323647	-0.34619	-0.1279	-0.352154	NA	-0.24108	NA	NA	NA	NA	NA	NA	NA
DMAC2L	-0.183257	0.275104	0.215334	-0.217231	-0.0410381	-1.1347	-0.723607	-0.196458	-0.279323	-1.01474	NA	NA	-0.46982	-0.811859	NA	-0.460347	-0.144982	-0.138466	-0.33973	-0.337233	NA	NA	NA	NA	NA	NA	-0.496455
DMAP1	-0.37918	-0.72414	-0.406203	-0.748801	-1.01146	-0.863127	NA	-1.07556	-0.865209	-0.799295	-0.592778	-0.584924	-0.102993	-0.108699	-0.115874	0.218362	0.241006	0.134449	0.265531	0.224427	NA	NA	NA	NA	NA	NA	0.245256
DNAAF5	-0.771696	-0.926137	-1.10502	NA	NA	-0.724103	-0.435299	NA	NA	-0.0987473	-0.404737	-0.343197	0.0887449	0.0931426	0.227034	-0.0563589	-0.341932	-0.477263	-0.245793	-0.163324	NA	NA	NA	NA	NA	NA	-0.934727
DNAH6	-0.52614	-1.14556	-1.08457	-0.649276	-0.601608	-0.275635	NA	-0.602262	-1.00407	-0.77334	-0.860041	NA	NA	NA	NA	NA	NA	NA	NA	NA	NA	NA	NA	NA	NA	NA	NA
DNAH8	-0.196675	-0.253513	0.223342	0.371037	0.768444	0.759698	0.294392	0.0858468	0.266943	0.391125	0.383022	0.463241	NA	NA	NA	NA	NA	NA	NA	NA	NA	NA	NA	NA	NA	NA	-0.559602
DNAJA1	0.119007	0.454952	0.461147	0.299509	0.334587	0.15219	0.753705	0.716496	0.66688	0.978586	1.01733	0.919823	0.659293	0.851119	0.823575	0.957486	0.525125	0.551322	0.542673	0.483192	0.201488	-0.0186192	-0.123239	0.861491	0.68261	0.887941	0.594845
DNAJA2	0.346497	0.304141	0.241525	0.372682	0.363687	0.246755	0.82853	0.456732	0.460091	0.196966	0.295128	0.31388	0.61463	0.615467	0.694953	0.735786	0.786775	0.752493	0.915865	0.809207	0.48222	0.575405	0.598199	0.467472	0.557408	0.518842	0.417306
DNAJA3	-0.141148	-0.100768	-0.00953631	-0.103111	-0.0708087	-0.100356	0.13415	-0.0286582	0.121798	0.0274989	0.0649884	-0.130343	NA	NA	NA	NA	NA	NA	NA	NA	0.0185996	-0.400989	-0.51657	-0.0828292	-0.138363	-0.119275	-0.427101
DNAJB1	0.359505	0.391095	0.45646	0.602505	0.633086	0.572381	0.358457	0.424143	0.331317	0.292463	0.311646	0.336147	0.537915	0.627493	0.716805	0.520237	0.600619	0.709917	0.638057	0.701223	0.5171	0.625249	0.62142	0.356639	0.472265	0.369922	0.756907
DNAJB11	-0.454481	-0.294405	-0.358228	-0.070576	-0.233511	-0.122487	-0.0981184	0.117895	0.0168159	-0.165974	-0.0850104	-0.203496	0.388966	0.409881	0.509977	NA	NA	0.0622721	NA	NA	0.317866	0.0671491	0.423614	0.662742	0.624274	0.616765	0.401394
DNAJB12	NA	NA	NA	NA	NA	NA	-0.44909	-1.00505	-0.533301	-0.739756	-0.905163	-0.796986	-0.392264	-0.297895	-0.492068	0.0206567	-1.49412	0.196842	0.0343222	0.0438145	-1.16306	-0.672508	-0.469528	-0.673778	-0.299606	-0.977269	-1.13269
DNAJB2	-0.878697	-0.88312	-0.87123	-0.929557	-0.779671	-0.686148	NA	NA	NA	-0.979604	-1.01605	-1.20384	-0.0738236	-0.206473	-0.0925643	-0.487911	-0.320251	-0.117554	-0.151395	-0.0678129	-0.585779	-1.24175	-0.397826	-0.750759	-0.953971	-1.11721	0.638153
DNAJB4	NA	NA	NA	NA	NA	NA	NA	-0.706657	NA	NA	NA	NA	NA	-0.931955	-0.858284	NA	NA	-0.973371	NA	NA	NA	NA	NA	NA	NA	NA	0.952288
DNAJB6	-0.647167	-0.523539	NA	-0.60771	-0.174891	-0.500425	-0.248387	-0.203012	-0.472401	-0.432379	-0.192885	-0.337301	-0.406168	-0.305632	-0.189094	-0.114637	-0.159347	-0.244042	-0.282053	-0.469704	-0.428459	-0.348995	-0.820662	-0.360369	-0.21974	-0.529309	-0.0826773
DNAJC1	-0.822726	NA	NA	NA	NA	NA	-0.883561	-0.948175	-0.867867	NA	-0.62956	-0.66342	-0.463452	-0.400173	-0.223773	-0.131704	NA	-0.690373	-0.80594	NA	NA	NA	NA	NA	NA	NA	NA
DNAJC10	NA	NA	NA	-1.06861	-0.794237	-0.786326	-0.748415	-0.539967	NA	-1.25951	-0.699335	NA	-0.110109	-0.283868	-0.493557	0.0309049	-0.425731	-0.29872	-0.331714	-0.24258	-0.48228	-1.16604	-0.338317	-0.533413	-0.5188	-0.517579	-0.654556
DNAJC11	-0.243667	-0.21429	-0.566648	0.0116722	0.293129	0.00864022	0.150079	-0.367707	-0.0580499	0.20033	0.429374	0.331994	0.119193	0.155533	0.122553	0.174941	0.424033	0.373974	0.488276	0.368235	NA	NA	NA	NA	NA	NA	-0.552472
DNAJC13	-0.0417314	-0.0468997	-0.0415948	0.121311	0.0984142	0.00548717	-0.0679325	-0.254861	-0.179613	-0.15679	-0.107527	-0.123731	0.566005	0.628612	0.624379	0.485851	0.697532	0.638878	0.511467	0.90517	-0.597187	-0.382447	-0.753333	-0.717035	-0.758098	-1.16604	-0.248145
DNAJC17	NA	NA	-0.778537	-0.858634	-0.875629	-0.854394	-0.646238	-0.720946	-0.900965	NA	-0.616915	NA	-0.100547	0.100253	-0.323759	-0.165271	-0.0888721	-0.0876702	-0.172108	-0.0289377	-0.970366	-0.765638	-0.629041	-0.662996	-0.944662	-0.460935	0.0822154
DNAJC19	NA	NA	NA	NA	-0.862131	NA	-0.599971	NA	-0.999198	-1.04353	NA	NA	-0.056937	-0.217823	-0.317827	-0.0579747	-0.169162	-0.163286	-0.0581628	-0.126228	NA	NA	NA	NA	NA	NA	-0.895041
DNAJC2	-0.192064	-0.256542	-0.25985	-0.339157	-0.445737	-0.153908	-0.160442	-0.170417	-0.154439	-0.0588222	-0.028828	-0.147694	0.164715	0.271725	0.240277	0.324863	0.179022	0.158136	-0.129471	0.0743434	-1.09935	-0.333645	-0.300809	-1.00381	-0.0271824	-0.288333	0.111814
DNAJC21	NA	NA	-0.975744	NA	NA	NA	NA	NA	NA	-0.83314	NA	NA	-0.452722	-0.390188	-0.318874	-0.357584	-0.519113	-0.664114	-0.533114	-0.568725	NA	NA	NA	NA	NA	NA	-0.364383
DNAJC3	-0.807639	-0.645142	-0.338101	NA	NA	NA	0.0424668	-0.15791	0.00155397	-0.209116	-0.366963	-0.50117	-0.127585	-0.135577	-0.108902	-0.030343	-0.336452	-0.538753	-0.524411	-0.432434	0.0374651	-0.019847	0.168258	0.291171	0.309331	0.256938	-0.508214
DNAJC5	-0.166607	-0.206373	-0.0746885	-0.309669	-0.462782	-0.408107	-0.245605	-0.216632	-0.440186	NA	NA	NA	-0.0903483	-0.00753967	-0.00861244	-0.159802	-0.0895742	0.110658	-0.0556352	-0.598019	NA	NA	NA	NA	NA	NA	-0.527919
DNAJC7	-0.301659	-0.235865	-0.246656	-0.15725	-0.0262659	-0.0827784	0.424662	0.491954	0.290818	0.191715	0.164213	0.206678	0.559024	0.529692	0.480112	0.649422	0.168137	0.042836	0.201252	0.109112	0.104933	0.443757	0.425314	0.531148	0.546453	0.528348	0.636399
DNAJC8	0.553835	0.495312	0.399189	0.524876	0.654071	0.537257	0.526913	0.3579	0.391095	0.357129	0.438754	0.40224	0.55098	0.624059	0.632182	0.782611	1.37488	0.872905	0.900661	0.96759	0.260132	0.26201	0.68775	0.374857	0.718996	0.582587	0.412005
DNAJC9	0.548042	0.495312	0.518785	0.563474	0.461143	0.565965	0.424662	0.611576	0.553236	0.548708	0.450293	0.493489	0.551315	0.708088	0.746741	0.783794	0.791347	0.776662	0.745512	0.855429	0.502062	0.706889	0.881114	0.540867	0.612109	0.467472	0.576977
DNASE2	-0.709248	-0.46981	-0.891109	-0.450463	-0.666382	NA	-0.702536	-0.904066	-0.884762	NA	-1.20594	-0.931732	-0.271969	-0.418	-0.371952	-0.377304	NA	-0.239817	NA	-0.222234	NA	NA	NA	NA	NA	NA	-0.533131
DNLZ	NA	NA	NA	-0.453109	-0.887193	-0.848744	NA	-1.11586	NA	NA	NA	-0.961542	NA	NA	NA	NA	-0.434685	-0.349286	-0.412617	-0.449498	-0.669887	-1.02349	-0.379595	-0.695425	-0.393424	-0.512588	-0.662368
DNM1L	0.307081	0.343261	0.30439	0.194821	0.0254883	0.0117157	0.304041	0.389447	0.384736	0.358532	0.227344	0.364329	0.585481	NA	0.538812	0.526541	NA	NA	NA	NA	0.434835	0.472265	-0.0521183	0.504654	0.481535	0.442809	0.480406
DNM2	1.71939	1.71652	1.69664	1.27062	0.970708	0.959118	0.706256	0.86137	0.877461	0.891759	0.816445	0.847217	NA	NA	NA	NA	NA	NA	0.948583	NA	0.943214	0.774198	0.895004	0.670165	0.65085	0.734061	1.43248
DNMT1	-0.0723199	-0.105214	-0.129679	0.147363	0.0526881	0.0902246	0.546773	0.529138	0.542884	0.598238	0.571235	0.562293	NA	NA	1.12838	1.19609	NA	NA	NA	NA	NA	NA	NA	NA	NA	NA	-0.0521077
DNPEP	0.783053	0.787362	0.787079	0.574396	0.571777	0.619341	0.674368	0.389447	0.521706	0.612341	0.499303	0.722861	NA	NA	0.576646	0.630975	1.20698	1.22904	0.938935	1.17105	0.656657	0.67613	0.71032	0.695935	0.746533	0.574702	0.488309
DNPH1	-0.171256	-0.286848	-0.265501	-0.760704	NA	NA	-0.354069	-0.778736	-0.591117	-0.274697	-0.402794	-0.306111	0.593477	0.375042	0.315958	0.193588	0.542892	0.506824	0.515689	0.546339	-0.529389	-0.0139913	-0.0793807	-0.435568	-0.149795	-0.439022	NA
DNTTIP1	-0.665554	-1.06137	-0.931923	NA	NA	NA	NA	NA	NA	NA	NA	NA	-0.410808	-0.381732	-0.228176	-0.0431956	0.00629301	0.0150937	0.0140552	0.138251	NA	NA	NA	NA	NA	NA	-0.490039
DNTTIP2	-0.0597677	-0.23806	0.0458821	-0.191952	-0.080687	-0.111853	0.200922	0.0621359	0.0348626	0.186866	0.20778	0.221706	0.324054	0.383135	0.415367	0.457903	0.402	0.44378	0.548281	0.392399	NA	NA	NA	NA	NA	NA	0.458436
DOCK10	0.612479	0.639126	0.652732	0.662691	0.571777	0.550647	0.630032	0.543983	0.66214	0.457695	0.464159	0.601189	NA	NA	NA	NA	NA	NA	NA	NA	0.246681	0.127129	0.311537	0.523995	0.342014	0.576881	0.148444
DOCK11	0.650596	0.696014	0.693024	0.684862	0.605638	0.559823	0.360595	0.391835	0.404032	-0.0426948	-0.302835	-0.0735189	0.386983	0.445271	0.527205	0.590832	1.07511	1.02705	0.878918	1.01876	-0.407265	-0.247928	-0.37457	-0.414078	-0.539867	-0.532986	0.225564
DOCK2	1.1668	1.15943	1.15322	1.17558	1.00555	0.982352	0.98741	0.916193	0.844895	0.944233	0.954717	0.954338	1.26548	1.35194	1.4054	1.26537	1.74524	1.6992	1.5902	1.76263	0.359697	0.21646	-0.100468	0.559816	0.164994	0.516803	0.408168
DOCK6	0.0501281	0.243685	0.31427	0.425087	0.417927	0.479148	0.322334	0.300401	0.185426	-0.566493	-0.523482	0.180712	NA	NA	NA	NA	NA	NA	NA	NA	NA	NA	NA	NA	NA	NA	NA
DOCK8	0.888031	0.90876	0.905523	0.916379	0.843729	0.804905	0.65945	0.752409	0.76361	0.72069	0.640777	0.535918	1.06803	1.10948	1.18806	1.00842	1.35656	1.30646	1.16391	1.22979	-0.0330553	-0.0974372	-0.231592	0.33019	-0.114389	0.03132	-0.124253
DOCK9	-0.0790477	-0.142519	-0.211539	-0.0229463	-0.231541	-0.259658	-0.110369	-0.00139596	-0.117201	-1.01903	-0.45808	-1.01959	-0.245774	0.453062	0.168116	0.050859	0.478503	0.459	0.332131	0.404165	NA	NA	NA	NA	NA	NA	0.159599
DOHH	-1.03347	NA	-0.727037	-0.712502	NA	NA	-0.144593	-0.57395	-0.196612	-0.00307562	-0.067251	0.165022	0.317318	0.0698064	0.0557661	-0.329567	-0.285721	-0.541104	-0.613506	-0.433035	-0.44663	-0.888825	-1.01921	0.331003	0.286973	0.0483861	-0.178871
DOK1	-0.543386	-0.452807	-0.676674	-0.440695	-0.552449	-0.430836	NA	-1.51687	-0.903013	NA	-0.860041	NA	0.195781	0.127475	0.182379	-0.208366	-0.402618	-0.481867	-0.550544	-0.691468	0.0506206	-0.297216	-0.151861	-0.515714	-0.0793807	-0.681952	-0.291632
DOK2	0.465668	0.460687	0.474735	0.524876	0.557844	0.454679	0.249249	0.24813	0.131642	0.116752	0.111953	0.146488	0.312571	0.298585	0.250029	0.219531	0.586602	0.670635	0.464714	0.618398	0.831488	0.715928	0.977178	0.56685	0.597381	0.620576	0.1112
DOP1B	-1.127	-1.39002	NA	NA	NA	NA	NA	NA	NA	NA	NA	NA	0.0863508	-0.194269	0.0414778	0.435207	0.227296	0.171027	0.283009	0.514871	NA	NA	NA	NA	NA	NA	-0.448899
DPF2	-0.222989	-0.0864905	-0.0761754	-0.305532	-0.216844	-0.27761	-0.296658	-0.221864	-0.261674	-0.547223	-0.520084	-0.869665	0.356893	0.346425	0.329738	0.395088	0.312901	0.190137	0.313263	0.341331	-0.357148	-0.0335844	-0.228227	-0.548498	-0.548498	-0.732948	0.251425
DPH1	NA	NA	NA	NA	NA	NA	NA	NA	NA	NA	NA	NA	-0.246406	-0.24406	-0.271025	-0.533444	-0.580216	-0.638615	-0.611775	-0.642138	NA	NA	NA	NA	NA	NA	-0.936702
DPH2	NA	NA	-1.00257	NA	NA	NA	-0.594636	-0.750112	-0.834638	NA	NA	NA	-0.791621	NA	-0.511763	-0.469555	-0.0932883	-0.204366	-0.455401	-0.359804	-1.0329	-1.02697	-0.471153	-0.468307	-0.468415	-0.525008	-0.0737541
DPH5	NA	NA	-1.00257	-1.20708	-0.93506	NA	NA	-0.639448	NA	NA	NA	NA	-0.0186905	-0.0837428	-0.110881	-0.233516	NA	NA	NA	NA	NA	NA	NA	NA	NA	NA	-0.126195
DPH7	-1.01771	-0.886108	NA	NA	NA	NA	NA	NA	NA	-0.808199	-0.600101	-0.687259	NA	NA	NA	NA	NA	NA	NA	NA	NA	NA	NA	NA	NA	NA	NA
DPM1	-0.236998	-0.23806	-0.226062	-0.250136	-0.423139	-0.188349	-0.253123	-0.29968	-0.381026	-0.542749	-0.689041	-0.494992	0.513136	0.327906	0.664834	0.532373	0.491099	0.566897	0.531492	0.644035	-0.114389	-0.0369259	0.0209163	0.827661	-0.364358	-0.686532	0.267737
DPM3	-0.24861	-0.188762	-0.229162	-0.0926681	-0.14121	-0.352786	-0.444928	-0.541777	-0.54256	-0.427287	-0.428845	-0.441469	-0.592682	-0.208603	-0.0764151	0.155024	0.179285	0.134206	0.259956	0.196042	NA	NA	NA	NA	NA	NA	-0.15187
DPP3	0.519929	0.504328	0.452141	0.636266	0.553683	0.491992	0.606982	0.618856	0.669647	0.607611	0.606881	0.646506	0.773936	0.848084	0.769207	0.756145	0.611223	0.571518	0.626404	0.596752	0.66652	0.653822	0.426019	0.803382	0.783988	0.72404	0.318932
DPP4	0.371936	0.379596	0.383407	0.493279	0.535955	0.474267	0.236072	0.339267	0.272193	0.166997	0.21118	0.216389	0.251027	0.275702	0.216684	0.397335	0.295445	0.435334	0.322263	0.450877	0.757755	0.854925	0.538315	0.488554	0.532831	0.462092	-0.296846
DPP7	5.14996	6.57242	7.27011	3.01825	6.48454	5.59987	2.60619	2.9057	3.19106	3.19341	3.39999	3.48652	-0.292435	-0.189218	-0.0220311	0.0963302	0.108987	0.618585	0.364739	0.737446	0.171036	0.521208	0.431154	0.122507	0.209982	0.358465	0.263074
DPP9	-0.519039	-0.61223	-0.844427	0.00103895	-0.0139997	-0.231743	-0.374387	-0.5188	-0.682831	-0.64691	-0.683026	-0.764563	0.241482	0.238002	0.171054	0.281037	0.199888	0.204516	0.113246	0.155254	-0.143167	0.0807198	-0.177121	-0.328679	-0.131959	-0.126899	-0.366431
DPY30	-0.150464	-0.323494	-0.206387	-0.566573	-0.369395	-1.02121	NA	NA	-0.751954	-0.33943	0.755216	0.446319	0.356098	0.115626	0.20114	0.333227	0.506302	0.456521	0.421868	0.837987	NA	NA	NA	NA	NA	NA	0.460497
DPYD	0.269615	0.304141	0.248542	0.40735	0.276451	0.279162	-0.231252	-0.571462	-0.138278	-0.91308	-0.640904	-0.679235	0.204209	0.0861707	0.367848	0.324389	0.519651	0.560993	0.489446	0.559117	0.410331	-0.134069	0.37986	0.127608	-0.196923	0.391179	0.639175
DPYSL2	0.803033	0.702244	0.704622	0.788299	0.71972	0.823411	0.612543	0.583397	0.648837	0.311501	0.422065	0.315818	1.08487	1.32937	1.34394	0.689213	0.656281	0.529405	1.13173	0.595459	0.923015	0.81109	0.828908	0.725035	0.775498	0.708122	-0.0224234
DR1	0.197058	0.0986262	0.114053	-0.122395	0.0254883	0.0535992	0.226708	0.111646	0.159772	0.233467	0.170543	0.146488	0.194491	-0.461107	0.0277122	0.0409619	0.559291	0.380953	0.186455	0.433971	0.361684	0.243573	0.333611	0.392537	0.0283728	0.228891	1.61394
DRAP1	0.140852	0.114485	0.186814	-0.104153	0.0949935	0.0343599	-0.0706894	-0.123905	-0.110192	0.243696	0.29801	0.188323	0.474303	0.141709	0.389649	0.353548	0.462616	0.537024	0.667136	0.680258	-0.820051	-0.820662	-0.259742	-0.940412	0.017186	-0.364441	0.0271467
DRG1	-0.0469215	-0.0148412	-0.0525302	-0.137252	-0.436065	-0.272355	0.22042	0.320735	0.290818	0.464544	0.272891	0.338968	0.655355	0.822598	0.883667	0.791836	0.553127	0.53294	0.513219	0.618045	0.117284	0.200469	0.0797971	0.053853	0.0644389	0.0506206	-0.168509
DRG2	-0.326733	-0.0978154	-0.125685	0.0194863	-0.240773	-0.104861	0.244023	0.080929	0.0969869	-0.199969	-0.717535	-0.275429	0.0230043	0.212483	0.140879	0.109953	0.259819	0.321343	0.200702	0.279156	-0.0978661	0.120927	0.0650916	-0.184668	0.00937347	-0.0653131	-0.284901
DSC1	-0.476266	-0.253513	-0.524298	-0.695135	NA	NA	NA	NA	NA	NA	NA	NA	-1.19635	NA	-1.36337	-1.06079	-0.860119	-0.940179	-1.0212	-1.0133	-0.227368	-0.356572	-0.243404	-0.655963	-0.646913	-0.56681	-0.623672
DSG1	-0.501506	-0.552271	-0.665691	-0.267089	-0.504678	-0.464147	-0.718945	NA	-1.48129	-0.508083	-0.35354	-0.629764	-0.746721	0.0657384	-1.15702	-0.348715	-0.646794	-0.445599	-0.785997	-0.982724	-0.244289	-0.659619	-0.693052	-0.570545	-0.520741	-0.401669	-0.453545
DSN1	-0.427186	-0.674795	-0.629416	-0.594309	-0.678431	-0.597657	-0.814086	-1.00505	-0.545602	-1.30244	-1.31055	NA	-0.230578	-0.497451	-0.221574	-0.230138	0.0142208	0.0693956	-0.1128	-0.214771	NA	NA	NA	NA	NA	NA	-0.00234465
DSP	-0.454481	-0.60976	-0.0792267	-0.168432	-0.0547128	-0.237549	-0.564984	-0.446844	-0.597888	-0.619462	-0.55905	NA	0.0759006	-1.40166	0.204999	0.928103	0.491827	0.360408	0.492644	0.419495	-0.140247	-0.895144	0.0940276	-0.320561	-0.217039	-0.491988	-0.302748
DST	NA	NA	NA	0.102399	NA	-0.415212	-0.8079	-0.931932	-0.393685	-0.799295	-0.226262	NA	NA	NA	NA	NA	NA	NA	NA	NA	NA	NA	NA	NA	NA	NA	-0.607493
DSTN	0.293833	0.25415	0.29989	0.276471	0.491499	0.433948	0.214937	0.165925	0.116618	0.0955808	0.0234192	0.0386831	0.693711	0.651174	0.718965	0.345229	0.537747	0.595416	0.432123	0.571663	0.5228	0.23221	0.336283	-0.0762724	-0.0139913	0.417212	1.47038
DTD1	-0.45576	-0.503527	-0.416843	NA	-0.538011	-0.508383	-0.992678	-1.11586	NA	-0.665409	-0.162536	-0.878282	NA	NA	-0.453065	-0.272152	-0.248714	-0.308676	-0.389281	-0.273681	0.0867112	0.162296	0.21646	-0.134198	-0.0422246	-0.102727	-0.140078
DTNBP1	-0.433401	-0.145283	-0.304462	-0.463665	-0.342861	-0.659441	-0.817435	NA	-1.09309	NA	NA	NA	-0.0145584	0.00875231	-0.592571	-0.611613	0.134511	-0.353947	0.197	-0.209459	-0.291185	-0.875538	-0.799224	-0.607552	-0.728887	-0.406369	0.496876
DTX3L	-0.103168	-0.0406767	0.00641002	0.00218924	0.0496209	-0.0414308	0.537025	0.434363	0.484421	0.263161	0.290021	0.272123	0.0418711	-0.00275442	0.155802	0.373941	0.276705	0.162355	0.389097	0.119444	-0.137394	-0.351116	-0.180999	-0.288951	-0.256299	-0.0698509	0.168328
DTYMK	-0.427186	-0.345369	-0.673936	-0.181114	-0.168872	-0.331082	-0.333004	-0.538189	-0.617873	-0.191561	-0.167379	-0.20067	0.784661	0.583357	0.718584	0.564223	0.296003	0.395238	0.208004	0.309363	0.120422	0.125327	0.152637	0.117581	0.0305372	0.101553	-0.0762846
DUS1L	-0.711695	-0.852245	-0.709408	NA	NA	-1.39324	-0.8079	NA	-0.727081	-0.354763	-0.585914	-0.965938	-0.369404	-0.0402326	0.145906	-0.405099	-0.490303	-0.309845	-0.441401	-0.393369	NA	NA	NA	NA	NA	NA	-0.00757016
DUS3L	-0.688934	-0.61503	-0.714357	-0.925432	-0.760642	-0.572448	-0.393645	-0.56929	-0.582883	-0.575917	-0.333644	-0.161691	-0.112997	-0.0295716	0.0698342	-0.108831	-0.170124	-0.452958	-0.446706	-0.244633	-0.331615	-0.726985	-1.14269	-0.36632	-0.256657	-0.160442	0.154995
DUSP11	-0.883702	-0.76964	-0.746075	-0.536871	NA	NA	-1.12945	-0.763904	-0.507792	NA	NA	NA	-0.57117	-0.417706	-0.252983	-0.042367	-0.177625	-0.076228	-0.0193598	-0.0360692	NA	NA	NA	NA	NA	NA	-0.0338371
DUSP12	-0.921267	-0.713866	-0.639446	-0.7109	-0.493762	-0.57631	-0.107114	-0.342177	-0.372125	-0.364275	-0.13819	-0.514617	0.130146	0.175131	0.200428	0.322749	-0.158251	-0.178829	-0.503833	-0.19068	-0.367693	-0.249273	-0.287387	-0.520564	-0.435568	-0.484228	-0.692532
DUSP23	-1.21888	-1.04673	NA	-0.99224	NA	NA	NA	-0.838005	NA	NA	NA	-1.1946	0.110487	-0.0267286	-0.174959	-0.100641	-0.476926	-0.461999	NA	-0.461848	NA	NA	NA	NA	NA	NA	-0.663621
DUT	0.304127	0.279905	0.202145	0.159936	0.222394	0.275689	0.741871	0.746804	0.773202	0.797272	0.711744	0.695779	1.77041	1.55045	1.41324	1.48962	NA	NA	NA	NA	0.280044	0.309331	0.474991	0.17897	0.133011	0.291529	1.12388
DVL2	NA	-1.25718	-1.24482	-0.864804	-0.668442	-1.5115	-1.12193	-1.02043	-0.977282	-0.855705	NA	-1.13886	-0.615827	-0.396108	-0.765123	-0.670069	-0.520992	-0.680872	-0.879404	-0.61517	-0.787189	-0.5188	-1.15546	-0.762439	-0.880099	-0.499869	-0.481013
DYNC1H1	1.50374	1.42108	1.47553	1.23917	1.20985	1.1823	1.31327	1.18741	1.24527	1.206	1.16933	1.17618	1.76432	2.22355	2.12493	1.92217	2.23412	2.12918	1.79288	2.16837	0.221351	0.255772	0.33196	0.872277	0.664781	0.906684	0.227166
DYNC1I1	NA	NA	NA	-1.04324	-0.766572	-0.744958	NA	-0.973664	NA	NA	NA	NA	-0.297876	-0.293608	-0.421464	NA	NA	NA	NA	NA	NA	NA	NA	NA	NA	NA	NA
DYNC1I2	-0.0175707	0.19012	0.254557	0.223801	0.39287	0.38399	0.32746	0.256507	0.397953	0.107303	0.103097	0.0995258	0.429377	0.397772	0.803536	0.434272	0.332031	0.32067	0.306477	0.32292	0.389245	0.556495	0.570207	0.203118	0.322741	0.291171	0.442097
DYNC1LI1	0.152556	0.161322	0.0981771	0.211139	0.0496209	0.0596693	0.074606	0.12539	0.401295	-0.14102	-0.107527	-0.227942	0.644474	0.606446	0.625873	0.541002	0.522452	0.506205	0.373859	0.51708	0.34016	0.506861	0.486706	0.228891	0.323285	0.376689	0.00172332
DYNC1LI2	-0.773784	-0.709841	-0.399556	-1.10424	-0.633166	-0.807361	-0.196701	-0.912978	-0.368897	-0.603978	-0.511633	-0.372912	-0.0548023	-0.0719238	0.0386141	-0.117485	0.0606987	-0.0318491	0.173141	0.137679	0.0671491	0.0317922	-0.602663	-0.262827	-0.1178	-0.050245	-0.125036
DYNLL1	-0.597383	-0.490982	-0.424164	-0.574342	-0.659627	NA	NA	-0.723545	-0.702362	NA	NA	NA	0.850162	0.757062	0.756771	0.845202	0.953408	0.639293	0.694631	0.656995	NA	NA	NA	NA	NA	NA	0.513152
DYNLL2	0.656116	0.670742	0.643479	0.276471	0.408216	0.200308	0.330344	0.312816	0.294817	0.0254348	0.0697278	0.0457801	-0.294221	-0.290912	-0.501187	-0.0768007	0.541651	0.125131	0.521339	0.0266214	-0.084489	-0.351825	-0.367693	0.111231	-0.556625	-0.223965	0.714705
DYNLRB1	-0.118438	-0.165907	-0.0829235	-0.253024	-0.0443475	-0.0486473	0.233283	0.0380582	0.182026	-0.0148397	-0.0537015	0.165022	0.482618	0.447379	0.344506	0.327518	0.0808998	0.157148	0.158079	0.258358	-0.526243	-0.423507	-0.275241	-0.153539	-0.752843	-0.679465	1.02542
DYNLT1	NA	NA	NA	NA	NA	NA	-0.900111	-0.96434	-1.06403	-0.452156	-0.328587	-0.304452	-0.427098	-0.446686	-0.413115	-0.253072	NA	-0.536746	-0.996185	-0.549427	NA	NA	NA	NA	NA	NA	NA
DYNLT3	-0.135697	-0.105214	-0.221835	-0.1417	-0.0882343	-0.100356	-0.415939	-0.295411	-0.437614	-0.707148	-0.554802	-0.936951	-0.495598	-0.667566	NA	NA	0.122381	0.0707867	-0.124736	0.0607844	NA	NA	NA	NA	NA	NA	-0.202459
DYRK1A	-0.505897	-0.488313	-0.480053	-0.771099	-0.400598	-0.309019	-0.687504	-0.652454	-0.855471	-0.962993	-0.935244	NA	0.0353949	0.10767	0.0123692	-0.153628	-0.00712153	-0.0676689	-0.118417	-0.0849319	NA	NA	NA	NA	NA	NA	0.144025
EAF1	NA	NA	NA	NA	NA	NA	NA	NA	NA	NA	-0.941492	NA	-0.535494	-0.613942	NA	-0.743616	-1.10041	NA	NA	NA	NA	NA	NA	NA	NA	NA	NA
EARS2	-0.574331	-0.790684	-0.553248	NA	-0.889625	NA	-1.39885	-0.993664	-1.09014	-1.07186	-0.952414	NA	-0.585214	-0.421496	-0.560922	-0.500311	-0.47359	-0.332905	-0.137614	-0.397035	NA	NA	NA	NA	NA	NA	-0.363859
EBNA1BP2	0.148816	0.0913639	0.110134	-0.191952	-0.0708087	0.0304623	0.166154	0.054197	0.116618	0.156144	0.155657	0.229321	0.493435	0.498382	0.33945	0.490843	0.350094	0.179055	0.420291	0.282866	NA	NA	NA	NA	NA	NA	-0.12128
EBP	0.0693582	0.129835	0.143738	-0.287427	-0.477321	-0.192972	-0.151771	-0.0652299	-0.11234	-0.316293	-0.157599	-0.206455	0.262141	0.345213	0.516854	0.487803	0.0669961	0.121945	-0.0149055	0.131699	-0.775573	-0.534529	-0.928019	-0.902036	-0.999612	-0.648493	0.494686
ECD	NA	NA	NA	NA	NA	NA	-0.795463	NA	NA	-0.124939	-0.100528	-0.886661	-0.277826	-0.199855	-0.308761	-0.257826	-1.06658	-0.939221	-0.920977	-1.0528	NA	NA	NA	NA	NA	NA	NA
ECH1	0.834955	0.819163	0.879986	0.821043	0.830343	0.787368	0.590839	0.599635	0.624408	0.630104	0.782674	0.579821	1.0211	0.99906	0.926118	0.972378	1.10408	1.04652	1.21095	1.23324	1.27245	1.00026	1.21218	1.17734	0.937611	0.899273	0.72822
ECHDC1	0.377512	0.465105	0.480015	0.317587	0.332795	0.390791	0.318295	0.409916	0.429265	0.226308	0.209564	0.17856	NA	NA	NA	NA	NA	NA	NA	NA	0.671022	0.342014	0.266551	0.388647	0.496171	0.111231	0.849167
ECHDC2	-0.531393	-0.60976	-0.673936	-0.613794	-0.828951	-1.1295	NA	NA	NA	NA	NA	NA	NA	-1.07644	NA	-0.423848	-0.259497	-0.0973592	0.690678	0.716469	NA	NA	NA	NA	NA	NA	-0.755053
ECHS1	0.494017	0.587621	0.532972	0.445152	0.543101	0.628224	0.537025	0.533134	0.630804	0.397605	0.205037	0.551226	1.06472	0.85746	0.915957	0.950521	1.19091	1.41329	1.60253	1.4088	1.02537	0.0852413	0.348055	0.879719	0.58836	0.741098	0.453987
ECI1	-0.0597677	0.101701	-0.0325469	-0.191952	-0.0566078	-0.0216714	0.0424668	-0.100413	-0.202436	-0.195598	-0.192885	-0.301267	0.300268	0.375695	0.400243	0.211702	0.677091	0.734012	0.816405	0.498514	0.526597	0.338725	0.275488	0.360937	0.339781	0.280666	0.052312
ECI2	-0.0597677	0.0936319	0.0636	0.0468607	-0.157977	-0.259658	-0.350424	-0.15791	-0.429812	-0.478897	-0.99277	-1.15534	0.037904	0.24474	0.197293	0.0595602	0.359796	0.330375	0.39868	0.22427	0.383029	0.369922	0.287414	-0.124878	0.0367687	-0.052474	0.790639
ECPAS	-0.0386783	-0.057408	0.0339249	-0.134232	-0.49131	-0.616298	0.2812	0.180021	0.277763	0.0987014	0.290021	0.299942	0.615663	0.78684	0.821579	0.563387	0.3975	0.446533	0.190993	0.422226	-0.731521	-0.750041	-0.8559	-0.839885	-0.925622	-0.966039	-0.436046
ECT2	NA	NA	NA	NA	NA	NA	NA	NA	NA	NA	NA	NA	NA	NA	-0.897706	NA	NA	NA	NA	NA	NA	NA	NA	NA	NA	NA	-0.476576
EDC3	-0.281689	-0.374449	-0.587376	-0.476242	-0.451716	-0.688991	-0.117854	-0.336242	-0.0543709	-0.204651	-0.388395	-0.081731	0.448724	0.400755	0.197889	0.303238	0.326086	0.38525	0.236225	0.29846	-0.310302	-0.229158	-0.249273	-0.267315	-0.249273	-0.211815	0.291821
EDC4	0.465668	0.37667	0.515918	0.457495	0.318033	0.317674	0.540202	0.550812	0.553236	0.52477	0.397505	0.480164	0.785936	0.89495	0.993884	0.894662	0.744639	0.815867	0.717247	0.650811	-0.408403	0.121694	-1.03156	0.0249806	-0.369439	-0.0866887	-0.0766699
EDF1	0.474627	0.442041	0.397252	0.374632	0.290284	0.326518	0.19592	0.135042	0.15018	0.254384	0.29801	0.229321	0.534925	0.655675	0.419972	0.442636	0.279621	0.469863	0.315759	0.346088	0.053853	-0.326231	-0.394461	0.172899	0.100715	0.302986	0.721577
EEA1	0.610292	0.168335	0.0789947	0.0468607	-0.0443475	0.136564	-0.214216	0.0409815	-0.00230353	0.0755945	0.0373157	-0.196522	0.571503	0.571811	0.35438	0.738198	0.783981	0.83674	0.905905	0.859759	0.631204	0.409837	0.823595	0.511615	0.610675	0.581753	-0.0604436
EED	-0.742297	-0.357495	-1.02266	-0.549728	NA	NA	-0.0585159	-0.037486	-0.196612	-0.137736	0.109467	0.226151	0.422116	0.46604	0.425102	0.440756	0.104953	0.13496	0.103573	0.0242701	-0.647711	-1.05562	-0.00524066	-0.377078	-0.378066	-0.629283	-0.45607
EEF1A1	3.46303	3.28817	2.74622	2.76736	2.88126	2.75835	5.16348	7.08442	6.53155	4.30066	4.24159	4.08269	6.25015	NA	NA	NA	NA	NA	NA	NA	2.63069	2.772	2.772	3.35603	3.57783	3.57783	1.60159
EEF1AKNMT	-0.527499	-0.819742	-0.892907	-0.527101	-0.701972	-1.04029	-0.205939	-0.319568	0.0238569	-0.307598	-0.677862	-0.393955	0.14108	0.139682	0.0633741	-0.104816	-0.012893	0.0601393	-0.131498	-0.000499904	-0.420211	-0.626282	-0.366008	-0.375573	-0.126899	-0.369978	-0.371164
EEF1B2	0.805971	0.803441	0.769522	0.669987	0.639425	0.64682	0.79138	1.11451	0.96448	1.11666	1.11592	1.14009	1.55245	1.27499	1.31402	1.36614	0.974247	0.780938	0.91675	1.00099	0.705903	0.349157	0.743323	1.04855	0.754367	0.914671	0.697527
EEF1D	1.10603	1.0461	1.08433	1.17149	1.02257	1.00444	1.28462	1.31076	1.34522	1.36792	1.13236	1.36383	2.46458	1.88903	1.89836	2.06954	1.25914	1.42404	1.36338	1.34348	1.26542	1.38872	1.42348	1.24931	1.28645	1.29734	2.5978
EEF1E1	-0.100754	-0.199885	-0.0630748	-0.39443	-0.645276	-0.697089	-0.210362	NA	-0.733126	0.0274989	0.179176	-0.123731	0.48528	0.611581	0.622	0.311334	-0.033504	0.37101	0.267796	0.354328	-0.0226726	0.0605552	0.149161	-0.026281	0.0855699	0.166473	0.968381
EEF1G	1.25789	1.21014	1.25404	1.08331	1.21844	1.12746	1.46091	1.22319	1.28222	1.96104	1.97288	1.85413	1.73717	2.14549	1.94913	1.74321	1.24521	1.35649	1.10459	1.3539	0.745362	0.33773	0.32839	0.912928	0.701037	0.797387	0.834763
EEF2	2.48768	2.52703	2.59686	2.32284	2.42047	2.37597	3.46817	2.77216	2.73897	3.82845	3.50455	3.70963	4.84234	6.42904	6.59797	6.65064	3.97346	4.44495	3.64981	4.74605	2.39312	2.73438	2.3416	3.09303	3.17507	3.47994	1.10683
EEFSEC	0.193801	0.150325	0.188305	0.133254	0.236596	0.179013	0.296081	0.00900912	0.254993	0.0628616	0.269961	0.204774	0.390772	0.267661	0.351237	0.365694	0.659215	0.593848	0.555934	0.569754	0.16736	0.427726	0.271856	-0.050667	0.0557377	-0.121749	0.247787
EFHD1	-0.629225	-0.790684	NA	-0.797413	-0.606283	NA	NA	NA	NA	NA	NA	NA	-0.740779	-0.761264	NA	-0.765106	-0.222353	-0.0733907	-0.466619	-0.352356	-0.92159	0.236705	0.215554	-0.0553244	-0.572684	0.468207	-0.204121
EFHD2	0.420531	0.444417	0.45646	0.4902	0.52562	0.48918	0.166154	0.140687	0.182026	0.273782	0.263241	0.197382	0.829148	0.828342	0.807219	0.878663	0.479524	0.654939	0.598051	0.661148	1.12415	0.720087	1.01091	0.854925	0.853433	0.823595	1.25947
EFL1	-0.462474	-0.132547	-0.379461	-0.423655	-0.412586	-0.331082	-0.41159	-0.459343	-0.389809	-0.137736	-0.618642	-0.181604	0.218499	0.122784	0.122407	0.0426754	0.254012	0.167103	0.188019	0.204511	0.13021	-0.246287	0.147523	-0.146885	-0.0115073	0.0265704	0.39967
EFTUD2	0.912379	0.883334	0.876883	0.93931	0.801678	0.736523	1.03433	1.13116	1.05516	0.904199	0.7609	0.90561	1.50183	1.45584	1.49594	1.51646	1.42645	1.64062	1.64817	1.65013	0.51327	0.655879	0.523487	1.82949	1.21814	1.56423	0.820587
EGLN1	-0.838144	-0.61223	NA	-0.888695	-0.448421	-0.677791	-0.875355	-0.821667	-0.859048	-1.00916	NA	NA	-0.21854	-0.0408124	0.0576099	-0.0527307	-0.11501	-0.067905	-0.0572512	-0.0869452	-0.228707	-0.646298	-0.162755	-0.442308	-0.404762	-0.390452	-0.180143
EHBP1L1	-0.0765808	-0.156923	-0.00283473	-0.324968	0.0742683	-0.12606	-0.55506	-0.705109	NA	-0.448156	-0.508088	-0.801635	-0.287211	-0.0744212	-0.0939581	-0.0795535	-0.18881	-0.170848	-0.239241	-0.108578	-0.317767	-0.284731	-0.239334	-0.389141	-0.437492	-0.433494	-0.287723
EHD1	0.996226	1.00452	0.970405	0.850901	0.839366	0.860351	0.943301	1.06194	1.28222	0.921376	0.821786	0.883131	0.727592	0.831688	0.852237	0.997474	0.922876	1.09481	0.95708	1.03332	1.0567	1.192	0.995719	0.928711	0.879719	0.882713	0.548624
EHD4	-0.161609	-0.108828	-0.0492876	-0.485095	-0.14121	-0.111853	0.249249	0.236341	0.422749	0.457695	0.429374	0.460718	0.515544	0.686513	0.598348	0.457138	-0.0534591	-0.00210322	0.0527907	0.112927	0.261402	0.665382	0.64274	0.795124	0.669046	0.785212	0.679573
EHMT1	-0.751933	-0.656589	-0.486522	-0.873875	-0.584828	NA	-1.81621	NA	NA	-1.13575	-0.690849	-1.57322	-0.0606045	-0.387232	-0.124115	-0.0150284	-0.167199	-0.0177903	-0.255014	0.0182301	NA	NA	NA	NA	NA	NA	-0.405716
EHMT2	-1.04971	-0.799075	NA	NA	-0.959275	-1.05513	NA	NA	NA	NA	NA	NA	-0.0371636	-0.399583	0.0920268	-0.374399	-0.118565	0.0487364	-0.063088	0.0336341	NA	NA	NA	NA	NA	NA	-0.232267
EIF1	0.28187	0.19012	0.254557	0.13154	0.077271	0.218391	0.98741	0.764798	0.877461	0.586358	0.649197	0.754238	0.705367	0.557218	0.607435	0.959405	0.688073	0.663188	0.732192	0.70211	0.0257217	-0.354066	-0.423703	0.727577	0.344855	0.47894	0.539227
EIF1AD	-0.311145	-0.379067	-0.31527	-0.0129173	-0.454501	-0.467877	-0.177117	-0.172774	-0.285185	-0.599642	-0.62956	-0.544999	-0.107049	-0.170197	-0.170725	-0.0512821	0.124045	-0.0306271	-0.206756	-0.112065	-0.491514	-0.873939	-1.00015	-0.484644	-0.208639	-0.26007	0.378811
EIF1AX	0.491773	0.498988	0.467355	0.65346	0.530394	0.484158	0.46882	0.386858	0.427312	0.313244	0.329019	0.342039	0.560092	0.49612	0.602614	0.607666	0.355627	0.374333	0.450254	0.431853	-0.0793807	-0.088284	0.373731	0.297186	0.039763	0.343624	0.751464
EIF1B	NA	NA	NA	NA	NA	NA	-0.506508	-0.736011	-0.301615	NA	-1.13809	NA	NA	NA	NA	NA	-0.451579	-0.533957	-0.652367	-0.829123	NA	NA	NA	NA	NA	NA	0.635967
EIF2A	0.0601125	0.020054	0.0523943	-0.186615	0.101495	-0.0216714	0.284052	0.22667	0.238328	0.263161	0.193409	0.309393	0.665257	0.848734	0.786411	0.861734	0.284442	0.471722	0.118264	0.408638	-0.0587733	0.393333	0.143161	0.30775	0.425314	0.333031	0.245639
EIF2AK2	-0.0982428	-0.130044	-0.0746885	0.134988	-0.0470205	-0.0858486	0.537025	0.571521	0.477518	0.202478	0.249528	0.293074	0.294623	0.328155	0.424568	0.491915	0.241512	0.281596	0.227118	0.331925	-0.10959	0.0717945	0.0750851	0.0367687	-0.0283434	0.0955494	-0.358533
EIF2B1	-0.0110641	-0.0370782	0.0247491	0.147363	0.077271	-0.000800666	0.0631029	0.0972031	-0.0131695	0.116752	-0.0015422	0.0355157	0.385489	0.371432	0.385075	0.37909	0.221494	0.31027	0.210725	0.156112	-0.344633	-0.0148346	-0.285909	0.133461	-0.253657	0.0407465	0.108661
EIF2B2	-0.480053	-0.494677	-0.23195	-0.242894	0.0550687	-0.315779	-0.177117	-0.262926	-0.0828101	0.0501027	0.184914	0.0144692	0.380543	0.430939	0.42167	0.550841	-0.116455	0.0356916	-0.101908	0.0917001	-0.299988	-0.769301	-0.657314	-0.19352	-0.0633927	-0.243404	-0.393675
EIF2B3	0.0218687	-0.003049	-0.0492876	0.15025	-0.17822	-0.12785	-0.154616	-0.0147687	0.12704	-0.102629	-0.218766	-0.282748	0.418609	0.307346	0.478175	0.287591	0.172427	0.0351638	0.0106677	0.146092	0.126963	0.0770986	-0.523298	0.164994	-0.110337	0.338725	0.0670329
EIF2B4	-0.259493	-0.441647	-0.304462	-0.610524	-0.451716	-0.415212	-0.294252	-0.219655	-0.368897	0.168862	-0.104524	-0.566283	0.35366	0.390012	0.479765	0.28062	0.0641428	0.156052	NA	0.20463	-0.843498	-0.154181	-0.106516	-0.439776	0.00234383	-0.2473	-0.41851
EIF2B5	-0.473105	-0.421447	-0.446725	-0.226288	-0.534272	-0.456432	-0.310331	-0.109792	-0.382609	-0.154022	-0.272689	-0.343197	0.249101	0.356649	0.400615	0.142046	0.121366	0.113147	0.0360516	0.215227	-1.23801	-0.39094	-1.02119	-1.03419	-0.71204	-0.67843	0.282488
EIF2D	-0.419919	-0.347643	-0.329696	-0.688979	-0.518674	-0.626936	0.0585163	-0.915732	0.0585846	-0.510887	-0.544071	-0.403682	0.0337533	0.214604	0.185375	0.119273	0.342846	0.221375	0.196765	0.218454	-0.0866887	-0.782297	-0.115474	-0.224369	-0.65913	-0.226665	0.255862
EIF2S1	0.580131	0.587621	0.532972	0.553184	0.614669	0.548564	1.14016	1.09432	1.11714	0.816686	0.85919	0.865282	1.27423	1.22995	1.2405	1.20997	0.814462	0.983918	0.803349	0.911324	0.838882	1.062	1.01567	0.897932	1.01973	0.987564	0.404622
EIF2S2	0.483808	0.498988	0.518785	0.465083	0.602612	0.586096	0.566968	0.556456	0.612273	0.627514	0.611557	0.653155	0.8198	0.876831	0.911147	0.808216	0.712308	0.664762	0.653906	0.674936	0.182499	0.424782	0.239014	-0.208156	0.662742	0.533542	1.27766
EIF2S3	0.667761	0.685257	0.636373	0.712733	0.694337	0.736523	0.770991	0.899931	1.00056	1.0326	0.998554	1.02901	1.28536	1.52368	1.51087	1.28667	1.02419	1.10665	0.838457	0.968759	1.05469	1.17734	1.20086	1.25874	1.22745	1.26542	0.987408
EIF3A	1.1586	1.16567	1.15787	1.24717	1.09915	1.10244	1.42534	1.32443	1.33711	1.31147	1.29291	1.20338	1.528	1.77984	1.80047	2.08144	1.65587	1.58409	1.29676	1.6005	1.10465	1.14302	0.972843	0.969326	0.980708	1.08562	0.19656
EIF3B	0.748006	0.747532	0.748418	0.821043	0.77499	0.759698	0.783049	0.864256	0.82744	0.71265	0.635974	0.695779	1.35538	1.41877	1.35112	1.3681	1.10165	1.11441	1.00539	1.25835	0.760101	0.741098	0.556495	0.585866	0.633762	0.683624	0.192543
EIF3C	0.772386	0.769144	0.729636	0.777615	0.647409	0.586096	1.04022	1.01446	0.974135	1.08173	1.13236	1.14009	1.20514	1.22995	1.29074	1.53049	1.31584	1.00851	1.00237	1.08508	-0.324942	0.0740968	0.292731	0.0810861	0.924886	0.705903	0.125234
EIF3D	0.619177	0.652358	0.562984	0.823142	0.654071	0.619341	0.856606	0.712963	0.750997	0.636622	0.537132	0.583409	0.877915	1.01373	1.03807	0.981777	0.935018	0.799068	0.751177	0.782812	-0.298705	0.394824	0.412391	0.292731	0.551203	0.484261	1.01667
EIF3E	0.519929	0.520965	0.461147	0.303367	0.53422	0.424189	0.497474	0.616092	0.56182	0.676794	0.649197	0.619253	1.03157	1.08991	1.15082	1.10688	1.00938	0.907178	0.721346	0.985269	-0.0512804	-0.810361	-0.0758762	-0.191273	-0.37997	-0.205221	0.755696
EIF3F	0.540965	0.552215	0.57486	0.503734	0.52562	0.591688	0.614481	0.347934	0.612273	1.1456	1.0612	0.963162	1.24891	1.19501	1.10992	1.14916	0.574866	0.70574	0.410751	0.564743	0.485742	0.168501	0.206086	0.510171	0.361684	0.490707	0.0722725
EIF3G	0.498202	0.477346	0.52634	0.725481	0.406436	0.403758	0.728203	0.869221	0.664913	0.707737	0.526886	0.674196	0.698381	0.693874	0.716433	0.954508	0.632561	0.491036	0.458006	0.493897	0.652989	-0.0617014	0.693319	0.625249	0.696767	0.718136	0.542068
EIF3H	0.224933	0.285461	0.389468	-0.00094346	0.271986	0.27135	0.57511	0.641912	0.511017	0.522641	0.588898	0.559424	0.82425	0.750392	0.691902	0.836374	0.643405	0.605395	0.451626	0.666645	0.411765	0.372623	0.30401	0.21265	0.33168	0.191687	0.431364
EIF3I	0.67692	0.658575	0.658326	0.767303	0.677383	0.540021	0.783049	0.650317	0.644433	0.619074	0.62615	0.633706	1.24466	1.00097	1.12737	1.04102	0.766909	0.714033	0.686728	0.844424	0.696767	0.828908	0.702199	0.671022	0.731749	0.663803	0.464538
EIF3J	0.119007	0.125257	0.0458821	0.0295076	0.0550687	-0.0535808	-0.0679325	-0.00139596	-0.0888692	0.276674	0.213227	0.206678	0.636423	0.563384	0.587113	0.662971	0.556172	0.387835	0.50415	0.482702	-0.0330553	0.428094	0.541564	0.148633	0.491452	0.521208	-0.0869846
EIF3K	0.300434	0.357127	0.196699	0.259733	0.187534	0.186634	0.0804561	0.22667	0.0659444	0.470804	0.407058	0.377811	NA	NA	NA	NA	NA	NA	NA	NA	0.230022	0.274911	-0.410127	0.369391	0.165493	0.30673	0.64761
EIF3L	0.732779	0.652358	0.669609	0.563474	0.619211	0.572381	0.744601	0.616092	0.627127	0.665003	0.649197	0.734365	1.12956	1.14282	1.24727	1.38848	1.13746	0.98009	0.906743	1.01696	0.155278	-0.111809	0.277415	0.339781	0.147523	0.245214	0.767341
EIF3M	0.45651	0.412746	0.397252	0.0668645	0.192878	0.0457564	0.252034	0.270879	0.387709	0.830234	0.998554	0.948113	0.927239	1.02843	1.00642	0.983989	0.647124	0.708595	0.556874	0.712831	0.417662	0.297602	-0.476991	0.49208	0.0938535	0.261402	0.146596
EIF4A1	1.05009	1.08598	1.0927	1.1621	0.894166	0.949953	1.69735	1.92014	1.95822	1.89079	1.80885	1.92146	NA	2.6889	NA	NA	NA	NA	NA	NA	1.33627	1.51051	1.3667	1.94517	2.08208	2.03058	0.726791
EIF4A2	0.701619	0.729436	0.748418	0.873917	0.594696	0.652603	0.542669	0.536008	0.688036	0.316508	0.329019	0.407003	0.563792	0.501331	0.462908	0.468687	0.944433	0.981707	0.876576	0.900585	0.939737	0.652446	0.774198	0.899273	0.868656	0.833155	0.71872
EIF4A3	1.13101	1.217	1.20203	1.20739	1.21495	1.29591	1.38438	1.23372	1.16004	0.987377	1.05004	0.983171	1.47565	1.41877	1.52499	1.48461	1.67691	1.64555	1.6675	1.5748	0.642279	0.739538	0.614016	0.47894	0.37918	0.355625	0.609744
EIF4B	0.590726	0.577406	0.689812	0.672026	0.602612	0.562565	0.635158	0.625537	0.567135	0.598238	0.557509	0.574486	0.873986	0.759999	0.84417	1.0443	0.770794	0.750529	0.858307	0.863909	0.601116	0.486706	0.730823	0.643729	0.680062	0.678863	0.797704
EIF4E	0.126321	0.223405	0.258291	0.457495	0.162146	0.232028	0.41767	0.336521	0.286623	0.233467	0.166818	0.315818	0.714324	0.610889	0.596319	0.751371	0.35304	0.463448	0.2629	0.230462	0.388647	0.366302	0.322741	0.288058	0.324051	0.380679	0.621985
EIF4E2	-0.510725	-1.1713	-0.789506	-0.905222	-1.03566	-0.724103	-0.407137	-0.596582	-0.761966	-0.544399	-0.679793	-0.710673	-0.226411	-0.175108	-0.284206	-0.286566	-0.208873	-0.106068	-0.267355	-0.136903	NA	NA	NA	NA	NA	NA	-0.201746
EIF4E3	-0.284249	-0.277558	-0.304462	-0.553181	-0.541171	-1.06408	-0.661794	-1.12949	-0.840809	-0.742279	-0.242367	-1.27052	-0.308794	-0.43175	-0.390815	-0.493812	-0.101093	-0.245894	-0.425851	-0.292019	NA	NA	NA	NA	NA	NA	0.0979586
EIF4EBP2	-0.0687086	-0.172742	-0.204438	-0.1417	-0.202021	-0.285099	-1.14219	-1.06168	NA	-0.489508	-0.483571	-0.594183	-0.193442	-0.172044	-0.104222	0.114471	-0.081261	0.0850682	0.0531861	0.105857	NA	NA	NA	NA	NA	NA	-0.214344
EIF4ENIF1	-0.805288	-0.991405	-0.824099	NA	-0.823772	-1.0176	NA	NA	NA	-0.448156	-0.44369	-0.7684	-0.140812	-0.0804211	-0.0617827	-0.447474	-0.668785	-0.334607	-0.446251	-0.379838	-0.666965	-0.497004	-0.336866	-0.56681	-0.385289	-0.716409	-0.0837588
EIF4G2	0.0937102	0.0522282	0.0381993	0.133254	0.197933	0.0190521	0.413959	0.40062	0.391095	0.575466	0.54376	0.521696	0.718503	NA	NA	NA	NA	NA	NA	NA	-0.12997	0.0265704	0.138589	-0.0901811	-0.208156	-0.0371607	0.231825
EIF4H	0.494017	0.531714	0.584575	0.51054	0.581717	0.562565	0.428061	0.396172	0.43086	0.566914	0.600685	0.568675	1.20843	1.22995	1.2405	1.02676	0.856925	0.742794	0.878103	0.770542	0.467472	0.43056	0.307323	0.49371	0.523487	0.50762	0.926355
EIF5	0.434322	0.370078	0.330814	0.344733	0.259079	0.256304	0.402261	0.35004	0.454045	0.516891	0.438754	0.551226	0.613672	0.640757	0.625352	0.752754	0.653767	0.524495	0.566634	0.53485	0.158877	0.561345	0.725035	0.346369	0.636276	0.572206	-0.157914
EIF5A	1.50814	1.49658	1.45905	1.52613	1.44929	1.44888	1.54532	1.34324	1.52344	1.99511	1.70683	2.23021	NA	NA	1.6352	NA	NA	NA	NA	NA	1.50486	0.449886	0.847362	1.77704	1.4684	1.79522	1.87757
EIF5B	0.489595	0.459529	0.42226	0.46226	0.384922	0.33258	0.679504	0.730904	0.756221	0.748967	0.649197	0.688035	1.02465	1.15866	1.14289	1.02562	0.620573	0.652083	0.535428	0.626384	-0.593849	-0.202516	-0.825723	-0.970366	0.236249	0.0977146	0.115744
EIF6	0.0937102	0.118591	0.0339249	0.0802804	0.255504	0.104826	0.396875	0.405802	0.408669	0.318902	0.336244	0.30135	0.940064	0.789355	0.901351	0.686326	0.646091	0.611172	0.653415	0.60632	0.609496	0.712813	0.532831	0.718136	0.831488	0.640945	0.342247
EIPR1	-0.206304	-0.242194	-0.217785	-0.15725	-0.228974	-0.320334	-0.422917	-0.65634	-0.558446	-0.902825	NA	-0.548463	0.127755	-0.112318	0.0543889	0.140648	-0.0147184	0.0826935	-0.183767	0.118817	0.0141964	0.126177	0.113333	-0.265618	-0.119832	-0.146885	-0.554055
ELAC2	-0.240281	-0.21429	-0.246656	-0.0444861	-0.199897	-0.256424	0.261374	0.0256258	0.281814	0.251691	-0.0212355	0.201192	0.671893	0.650656	0.708212	0.648322	0.609735	0.619005	0.569536	0.516028	0.122249	0.272371	0.170248	0.140448	0.220336	0.265812	0.394859
ELANE	0.29141	0.386071	0.339197	0.338726	0.440063	0.375238	NA	NA	NA	-1.20175	NA	NA	-0.615495	-0.452161	-0.989946	-0.587319	-0.248714	-0.607543	-0.416719	-0.504209	-1.16604	-0.992166	-0.720631	-1.04845	-0.845257	-0.912756	-0.288806
ELAVL1	0.772386	0.770647	0.769522	0.629821	0.789472	0.652603	0.566968	0.630083	0.639448	0.725427	0.770995	0.789911	1.45233	1.45195	1.44317	1.39066	1.17053	1.13422	1.35874	1.24752	-0.330415	-0.10109	-0.624308	-0.379595	-0.250249	-0.339808	0.735678
ELF1	0.244859	0.275104	0.28661	0.409578	0.265621	0.121046	0.163367	0.222287	0.263595	-0.146499	-0.318676	-0.196522	0.335455	0.249143	0.325011	0.358424	0.343672	0.338911	0.352516	0.393582	0.0253726	-1.10687	0.381378	0.134453	0.271856	0.00937347	0.511336
ELK1	NA	-1.46379	NA	NA	NA	NA	NA	NA	NA	-0.877049	-1.53948	-1.01001	-0.738829	0.0255853	0.0535218	-0.782142	-0.375793	-0.339836	-0.277357	-0.501236	NA	NA	NA	NA	NA	NA	NA
ELL	NA	-1.15576	NA	NA	NA	NA	NA	-1.06933	-1.17393	NA	NA	-0.91638	-0.311802	-0.227883	-0.28399	-0.219718	-0.539662	-0.27909	-0.509831	-0.455082	NA	NA	NA	NA	NA	NA	-0.790705
ELMO1	0.825669	0.855953	0.854774	0.862787	0.740253	0.732743	0.830528	0.769798	0.759861	0.701677	0.613875	0.599656	0.680731	0.755238	0.837775	0.839508	0.967211	0.957144	0.920883	1.00592	0.519651	0.344855	0.452923	0.553115	0.166473	0.541564	0.620997
ELMO2	-0.341975	-0.159025	-0.0148771	0.192884	-0.033349	-0.115913	0.0395716	0.0299268	-0.10612	-0.459422	-0.468655	-0.348137	-0.151872	-0.161524	-0.0111107	-0.231122	0.304337	0.124923	0.198272	0.179796	-0.561388	-0.70089	-0.145737	-0.641344	-0.611176	-0.706246	-0.176521
ELMOD2	-0.51704	-0.488313	-0.69468	-0.347347	NA	-0.901821	-0.80328	NA	NA	NA	NA	NA	-1.2394	-1.0961	-0.98204	-0.607457	-0.358476	-0.367847	-0.248983	-0.340822	NA	NA	NA	NA	NA	NA	-0.685117
ELMSAN1	-0.186743	0.0276298	-0.282981	-0.0281787	-0.287783	-0.467877	-0.13242	-0.323125	-0.190435	0.146732	0.140535	0.409353	NA	NA	NA	NA	NA	NA	NA	NA	NA	NA	NA	NA	NA	NA	NA
ELOA	-0.524638	-0.552271	-0.503508	-0.418635	-0.527542	-0.548433	-0.928071	-0.652454	NA	-1.02117	-0.781581	-0.944814	-0.250224	-0.295448	-0.0908751	0.0160419	-0.0852769	-0.336011	-0.145721	-0.33678	NA	NA	NA	NA	NA	NA	-0.900734
ELOB	0.167905	0.424072	0.152672	0.173828	0.204471	0.122809	0.169324	0.0409815	0.0446633	0.19392	0.230851	0.283646	0.959099	0.889414	0.752213	0.840126	0.545057	0.668523	0.578951	0.603581	-0.0283434	-0.272755	-0.226244	-0.0347645	-0.123239	-0.169905	0.404196
ELOC	0.423725	0.389002	0.32899	0.53299	0.296392	0.236724	0.363861	0.275952	0.270115	0.294971	0.249528	0.303289	0.812833	0.665172	0.547184	0.627793	0.383974	0.541185	0.360593	0.392766	0.183044	-0.0578552	-0.335077	0.238177	0.284886	0.335189	0.662721
ELOF1	0.00574621	-0.165907	-0.110874	-0.0129173	-0.233511	-0.191073	-0.212147	-0.259817	-0.264343	NA	-1.25226	NA	-0.607184	-0.488886	-0.690807	-0.67906	0.0930451	-0.0507337	0.0077102	-0.0783185	NA	NA	NA	NA	NA	NA	NA
ELOVL1	NA	NA	NA	NA	NA	NA	-1.63405	NA	NA	NA	NA	NA	-0.121875	0.0875929	0.105822	0.316925	-0.146096	-0.18329	-0.0761776	-0.0704977	-0.96933	-1.0472	-0.620556	-0.441537	-1.16306	-1.03009	0.298469
ELOVL5	NA	NA	NA	NA	NA	NA	-0.479984	-0.342177	-0.352738	-0.736408	-0.831635	-0.670109	-0.743507	-0.371709	-0.306528	-0.0033812	-0.704455	-0.718505	-0.659244	-0.728271	NA	NA	NA	NA	NA	NA	0.277918
ELP1	-0.315118	-0.100768	-0.275253	-0.27739	-0.170721	-0.156708	-0.302483	-0.311064	-0.363826	-0.571817	-0.709607	-0.438898	0.413832	0.439759	0.451215	0.322572	0.828699	0.692464	0.658261	0.22809	0.211964	-0.111082	-0.140801	0.198106	0.0257217	0.104933	0.016179
ELP2	-0.571399	-0.759745	-0.444012	-0.366056	-0.390667	NA	-0.234293	-0.583162	-0.837938	-0.585551	-0.915011	-0.982849	0.216174	0.0803278	0.256796	0.271928	-0.128395	-0.00603059	-0.137365	-0.018708	-0.679465	-0.371247	-0.565721	-0.547409	-0.544453	-0.536591	-0.0777312
ELP3	-0.437756	-0.433527	-0.295272	-0.349318	-0.504678	-0.823887	-0.658938	-0.645117	-0.324306	-0.77554	-0.989906	-1.25865	0.104241	0.272439	0.276037	0.131633	0.151748	0.152138	0.0875984	0.122688	NA	NA	NA	NA	NA	NA	-0.119703
ELP4	-1.29925	-0.963914	-1.23828	NA	NA	NA	-0.800664	NA	NA	-1.22784	-1.34433	-1.45174	-0.0272177	-0.129543	0.552852	-0.492131	-0.103291	-0.192874	-0.481554	-0.181322	-0.3612	-0.317767	-0.82125	-0.498386	-0.616781	-0.630284	-0.217233
ELP5	-0.635283	-0.571384	-0.727037	-0.870104	-0.842916	-1.07113	NA	NA	NA	NA	-1.16386	-0.933503	-0.425413	-0.535314	-0.443189	-0.45042	-0.541219	-0.459564	-0.563486	-0.49988	NA	NA	NA	NA	NA	NA	NA
ELP6	-0.773784	-0.855317	-0.693976	NA	-1.03566	NA	NA	-0.571462	NA	NA	NA	NA	-0.214963	-0.177496	-0.102276	-0.565989	-0.275493	-0.377118	-0.388864	-0.307091	NA	NA	NA	NA	NA	NA	NA
EMB	-0.551212	-0.667255	-0.508501	-0.700946	-0.578749	-0.799781	-0.689519	NA	NA	NA	-1.13234	NA	-0.137785	-0.328773	-0.208134	-0.0129161	-0.326743	-0.146757	-0.311885	-0.666114	-0.669199	-0.463586	-0.555849	-0.524472	-0.770187	-0.600083	-0.808499
EMC1	-0.363019	-0.543365	-0.388059	-0.817781	-0.379409	-0.504859	0.279149	0.183909	0.301035	0.25849	0.170543	0.167242	0.189402	0.164136	0.306577	0.229132	0.182421	0.228164	0.198077	0.252381	-0.555849	-0.49452	-0.403449	-0.438094	-0.477387	-0.628013	-0.312041
EMC10	NA	NA	NA	NA	NA	NA	-0.602551	-0.871329	-0.862471	-0.993778	-1.05751	-0.704271	-0.652597	-0.403596	-0.347013	-0.860415	NA	NA	NA	NA	NA	NA	NA	NA	NA	NA	-0.639773
EMC2	-0.733131	-0.523539	-0.863299	-0.478576	-0.601608	-0.558878	-0.493157	-0.431122	-0.437614	-0.637322	-0.614919	-0.771387	0.00247528	-0.0234331	-0.00721787	-0.0392477	-0.219622	-0.222053	-0.0688702	-0.238974	-0.594759	-0.40909	-0.375573	-0.57256	-0.624592	-0.940412	-0.682717
EMC3	-0.977669	NA	-0.928897	-1.08172	-0.848559	-1.01227	-0.538444	-0.416367	NA	-0.537393	-0.753737	-1.07172	-0.308042	-0.0522612	-0.185088	-0.33853	-0.310106	-0.331671	-0.285122	-0.280203	NA	NA	NA	NA	NA	NA	-0.220436
EMC4	-1.54954	NA	-1.54871	NA	NA	NA	-1.20297	-1.1954	-1.25412	-0.894731	-1.09744	-1.09522	NA	-0.952493	-0.489082	-0.212557	-0.323399	-0.509936	-0.703855	-0.784705	NA	NA	NA	NA	NA	NA	-0.379518
EMC7	-0.647167	-0.667255	-0.701783	-0.808049	-0.4657	NA	-0.220778	-0.147261	-0.349659	-0.40431	-1.13476	-0.824088	-0.187762	0.00984292	0.0507658	0.09871	-0.282822	-0.218617	-0.19954	-0.161102	NA	NA	NA	NA	NA	NA	-0.377571
EMC8	NA	-1.11485	NA	NA	NA	NA	-0.409232	-0.8837	-0.53785	-0.93983	NA	NA	-0.183796	0.0613415	-0.198337	-0.356239	-0.800599	-0.328683	-0.406622	-0.625947	NA	NA	NA	NA	NA	NA	0.303063
EMD	0.388008	0.39237	0.403673	0.18779	0.415484	0.358609	0.272294	0.217722	0.136603	0.236571	0.280757	0.255428	0.370899	0.451677	0.414258	0.570945	0.555619	0.519482	0.608445	0.606823	0.263906	0.199262	0.268311	0.270103	0.161319	0.187659	0.36135
EMG1	-0.0723199	-0.175894	-0.148835	-0.00305558	0.0813592	0.00548717	0.173938	0.325562	0.25227	0.164306	0.303371	0.201192	0.497764	0.63118	0.654012	0.62634	0.402637	0.425288	0.357717	0.425829	NA	NA	NA	NA	NA	NA	0.0142303
EML2	0.367551	0.304141	0.353511	0.425087	0.397492	0.320737	0.236072	0.091992	0.129469	0.316508	0.236431	0.224063	NA	0.413918	NA	0.12256	NA	NA	NA	NA	0.413811	0.515713	0.373056	0.216995	0.264548	0.250811	0.677483
EML3	0.434322	0.353335	0.415632	0.362738	0.427929	0.5436	0.481212	0.345199	0.328537	0.211878	-0.124674	-0.0944091	0.21261	0.247876	0.229481	0.382966	0.742803	0.75416	0.610343	0.750011	0.560688	0.685775	0.575405	0.26201	0.354086	0.351386	0.0832231
EML4	0.895576	0.924358	0.873	0.8896	1.01806	1.06271	0.76123	0.664617	0.619082	0.353191	0.37058	0.478493	0.49046	0.550959	0.598348	0.712327	1.02972	1.03291	0.74342	0.988075	0.872277	1.37534	1.11762	0.674796	0.946938	0.729056	0.0661414
EMSY	-1.20506	NA	-1.33494	-0.773829	-1.0653	NA	NA	NA	-0.668273	NA	NA	NA	-0.331265	-0.379725	-0.331075	-0.210014	-0.215712	-0.11318	-0.215998	-0.173527	NA	NA	NA	NA	NA	NA	0.103176
ENDOD1	NA	NA	-0.9242	NA	-1.06047	NA	-0.882286	-0.861205	-0.549764	NA	NA	NA	-0.156974	0.0085005	-0.0175074	-0.269	-0.527208	-0.574313	-0.360978	-0.392933	-0.964612	-1.08035	-1.09586	-0.771422	-0.970366	-0.728887	-0.43682
ENDOG	-0.743842	-0.571384	-0.537829	NA	-0.92583	-0.889875	-1.09529	NA	NA	NA	NA	NA	-0.41977	NA	-0.223834	-0.438111	-0.724319	-0.282112	-0.721409	-0.475524	NA	NA	NA	NA	NA	NA	-0.403575
ENGASE	-0.0565126	-0.0468997	0.0268189	-0.073831	-0.143728	-0.318776	-0.366661	-0.424793	-0.417385	-0.93983	-1.00006	-0.886661	-0.54352	-0.671974	-0.968584	-0.268601	0.482034	0.389386	0.0133031	0.354803	-0.456123	-0.422167	-0.542166	-0.528525	-0.804565	-0.864169	0.0403323
ENO1	3.11097	3.21765	3.19907	2.73684	3.11443	2.84283	4.24616	4.53925	4.20392	4.10286	4.04404	3.92775	19.6576	NA	16.9028	NA	4.07878	5.16148	NA	NA	3.80417	3.93856	3.93856	3.80417	3.80417	3.69156	2.36723
ENO2	0.344567	0.294386	0.309628	0.176105	0.377608	0.232028	0.566968	0.459396	0.25728	0.326393	0.272891	0.460718	1.23859	1.0241	1.12007	0.701955	0.937962	1.14749	0.730084	0.907442	1.14042	0.964917	1.26542	0.847362	0.997046	0.854925	0.671782
ENOPH1	0.0422816	0.0625239	0.0879898	0.0257506	0.120444	0.0933162	0.616265	0.215345	0.35031	0.267186	0.489575	0.338968	0.412245	0.296726	0.187337	-0.0234587	0.203571	0.2957	0.109089	0.27139	0.0695778	-0.401669	-0.672508	0.179491	-0.72846	0.118697	-0.0881003
ENOSF1	-0.754878	-0.552271	-0.840423	NA	NA	NA	-0.768115	NA	-0.515361	NA	NA	NA	-0.508095	-0.352012	-0.723618	-0.785706	-0.897381	-0.309142	-0.911566	-0.713627	NA	NA	NA	NA	NA	NA	0.212791
ENSA	0.315213	0.339095	0.326844	-0.171316	0.18018	0.222638	-0.748415	-0.219655	-0.434587	0.0557139	0.00867094	0.0577848	0.458615	0.507994	0.477207	0.472133	0.498777	0.501484	0.353843	0.511965	0.172004	-0.504894	-0.0982603	0.234506	0.134453	0.382137	1.67547
ENY2	-0.509745	-0.447194	-0.206387	-0.408871	-0.791386	-0.775419	-0.693711	-0.507856	-0.0976898	0.353191	-0.279991	0.103861	0.151004	0.016553	0.0849497	0.00264095	0.0112097	-0.128801	-0.0627291	0.0565482	NA	NA	NA	NA	NA	NA	-0.499582
EP300	-1.18178	-0.978289	NA	NA	-0.969267	NA	-0.742004	-0.908511	-1.28384	-1.20175	NA	-1.26196	-0.0323601	0.01101	-0.352621	-0.0890948	-0.0688825	0.0502596	-0.369069	0.25885	NA	NA	NA	NA	NA	NA	-0.427012
EP400	-0.390713	-0.357495	-0.275253	-0.331264	-0.236387	-0.440103	-0.194863	-0.203012	-0.271054	-0.0534272	-0.028828	-0.0963305	-0.0931203	0.0597964	0.792333	0.27793	0.388478	0.400278	0.423269	0.380434	NA	NA	NA	NA	NA	NA	-0.155985
EPB41	0.527228	0.57477	0.559239	0.690516	0.672315	0.599678	0.443363	0.330501	0.346079	0.107303	0.0854669	-0.0261507	NA	NA	NA	NA	NA	NA	NA	NA	0.908513	1.00389	0.980708	0.681308	0.752022	0.840162	0.607328
EPB41L2	-0.531393	-0.353609	-0.344873	-0.258889	-0.7516	-0.760978	-0.773477	-0.468496	-0.423063	-0.769792	-0.796655	-0.687259	0.269394	0.493258	0.561631	0.461806	-0.137203	-0.164874	0.0507984	-0.326534	-0.776153	-0.423829	-0.645229	-0.804565	-0.235309	-0.677669	0.203906
EPC1	-1.14561	NA	NA	NA	NA	-0.883295	-0.665159	NA	NA	NA	NA	NA	-0.977101	-1.22164	-1.08277	-0.658221	-0.404692	-0.448433	-0.335885	-0.477443	NA	NA	NA	NA	NA	NA	-0.318919
EPHA1	NA	-0.805976	NA	NA	NA	-0.552716	NA	NA	NA	NA	NA	NA	-0.974613	NA	-1.08193	-0.690874	-0.300232	-0.165989	-0.209566	-0.176696	NA	NA	NA	NA	NA	NA	-0.910978
EPHX2	0.531676	0.491744	0.471398	0.468507	0.461143	0.503188	0.335723	0.322501	0.318803	0.4241	0.383022	0.387907	-0.0445538	-0.104692	-0.131873	0.440234	1.25752	1.22022	1.81815	1.67448	0.39531	0.282456	0.0968077	0.0955494	0.042554	0.175084	0.464871
EPM2AIP1	-0.831286	-0.748524	-0.679569	-0.566573	NA	NA	NA	NA	NA	NA	NA	NA	-0.855196	-0.818282	-0.685087	-0.578178	-0.26508	-0.351692	-0.34195	-0.164524	NA	NA	NA	NA	NA	NA	-0.0536913
EPN1	-0.652535	-0.536766	-0.539599	-0.551384	-0.91913	-0.893431	-0.76421	-0.303057	-0.509805	NA	NA	-0.588273	-0.172834	-0.363723	-0.179453	-0.20588	-0.0657001	-0.165606	-0.0677644	-0.146688	-0.233294	-0.583952	-0.693816	-0.593849	-0.545586	-0.422167	-0.637282
EPPK1	0.267331	0.314066	0.258291	0.24017	0.204471	0.248666	0.12578	0.190692	0.23658	-0.316293	-0.525599	-0.529467	-0.521934	-0.50887	-0.514953	NA	-0.465865	NA	-0.0720826	-0.437624	0.468856	0.693319	0.791926	0.366302	0.56685	0.440151	0.0895234
EPRS	0.969958	1.076	0.993375	1.14975	0.980206	0.939692	1.14708	1.17802	1.19433	1.19391	1.24956	1.11971	NA	NA	NA	NA	NA	NA	NA	NA	NA	NA	NA	NA	NA	NA	NA
EPS15	0.152556	0.0166181	0.0103828	-0.0444861	-0.080687	-0.0388007	-0.0870081	-0.262926	-0.188531	-0.149604	-0.315049	-0.102763	0.519525	0.442016	0.4435	0.387256	0.33692	0.344262	0.344551	0.436607	0.596357	0.462683	0.654651	0.402147	0.474991	0.406774	0.101784
EPS15L1	-0.147183	-0.177949	-0.401923	-0.422472	-0.273766	-0.445198	-0.444928	-0.509787	-0.228735	-0.508083	-0.433838	-0.171999	0.470043	0.306603	0.394868	0.350677	0.245111	0.228834	0.280486	0.335878	0.33773	0.087474	0.404195	0.269529	0.209441	0.218283	0.685365
EPS8L2	NA	NA	-0.833672	NA	NA	NA	NA	NA	NA	NA	NA	NA	-0.572632	-0.600008	-0.431531	NA	-0.697963	-0.637867	-0.494866	-0.523804	NA	NA	NA	NA	NA	NA	-1.04706
EPSTI1	NA	NA	NA	NA	NA	NA	-0.457424	-0.344924	-0.312689	-0.732487	-0.774189	-0.799174	NA	NA	NA	NA	-1.25617	NA	NA	-0.703684	NA	NA	NA	NA	NA	NA	NA
EPX	1.41925	1.43017	1.42472	0.703459	1.08629	0.971217	0.730615	0.629482	0.702009	-0.778175	NA	-0.75531	0.13369	0.115284	-0.329706	-0.12266	-0.355365	-0.341516	-0.394108	-0.829547	NA	NA	NA	NA	NA	NA	-0.352983
ERAP1	0.795714	0.790536	0.75362	0.775994	0.736581	0.773055	0.723838	0.756677	0.855122	0.676794	0.755216	0.769092	0.803174	0.397585	0.718111	0.608655	1.05897	1.03777	0.893702	0.696245	0.72404	0.577763	0.600182	0.76092	0.462092	0.542283	0.814446
ERAP2	0.322508	0.205516	0.28182	0.357513	0.274817	0.28328	0.255777	0.268216	0.348325	0.391125	0.506239	0.40224	0.671463	-0.795974	0.31207	1.10495	0.824472	-0.860586	-0.411702	1.07708	-0.104513	-0.248632	-0.132554	0.571205	0.0463536	0.121694	0.162225
ERBIN	0.0898888	0.00200779	0.107442	0.0971502	0.159566	0.0704819	-0.738526	-0.424793	-0.576048	-0.187807	-0.108987	-0.0767258	-0.316053	-0.498669	-0.284991	0.108947	0.580993	0.565937	0.669096	0.612563	0.0468542	0.151564	0.113955	-0.261513	-0.125961	-0.215356	0.116272
ERC1	NA	-1.00732	-0.139651	-0.04796	-0.845443	NA	-0.210362	0.147311	-0.257189	-0.877049	-0.502745	-0.7018	-0.253528	-0.315147	-0.552257	-0.374664	-0.63119	-0.359554	-0.670016	-0.555093	-0.276152	-0.3612	-0.316639	-0.44211	-0.269102	-0.414078	-0.874149
ERCC2	-0.807639	-0.731678	-0.458968	-0.768724	-0.712694	-1.01456	NA	NA	NA	NA	NA	NA	-0.157142	-0.0891398	0.0350917	-0.230731	-0.167054	-0.207225	-0.214782	-0.109427	NA	NA	NA	NA	NA	NA	-0.187624
ERCC3	-0.520937	-0.430924	-0.801936	-0.728948	-0.590609	-0.677791	-0.658938	-0.196458	-0.18388	-0.595816	-1.01205	NA	-0.35303	-0.130336	-0.116127	-0.101148	-0.049653	-0.10481	-0.124992	-0.0634625	NA	NA	NA	NA	NA	NA	-0.713775
ERCC5	-0.735309	-0.58311	-0.787366	-0.833943	-0.981406	-0.999451	-0.231252	-0.336242	-0.287515	-0.466582	-0.918025	-0.572976	-0.61766	-0.369166	-0.367813	-0.197693	0.0961914	0.0716473	-0.00578424	0.046115	-0.681292	-0.744968	-0.993166	-1.08179	-0.735735	-0.829863	-0.35073
ERGIC1	-0.0633871	0.0251562	-0.0198402	-0.128676	-0.00112838	-0.0486473	-0.205939	-0.346427	-0.452219	-0.441489	-0.264413	-0.654801	-0.274232	0.0777367	0.126966	-0.0611664	0.265634	0.361936	0.407417	0.374402	-0.763812	0.00523658	-0.858564	-0.756108	-0.732131	-0.624131	0.352475
ERGIC2	-1.31677	NA	NA	NA	NA	NA	-0.258903	-0.390346	-0.223787	-0.461912	-0.746365	-0.558979	-0.497949	-0.542269	-0.510843	-0.747933	-0.244827	-0.277749	-0.0476117	-0.230573	NA	NA	NA	NA	NA	NA	NA
ERH	0.78046	0.688416	0.737579	0.409578	0.669912	0.636371	0.0172346	0.0325556	0.0768082	0.682775	0.642745	0.551226	1.24257	0.970033	1.02452	1.06357	0.913336	1.0061	1.16661	0.903907	-0.406369	-0.568888	-0.501831	-0.501566	-0.492448	-0.753333	1.39402
ERI1	NA	NA	NA	NA	NA	-0.840319	-1.02815	-0.617551	-1.03974	-0.869124	NA	NA	0.120342	0.441101	0.420733	0.173791	-0.427354	-0.679163	-0.544207	-0.492888	-0.738237	-0.332064	-0.68383	-0.721718	-0.672779	-0.587706	-0.758188
ERI3	-0.84538	-0.55876	-0.950863	-1.10424	-0.725117	NA	NA	NA	NA	NA	NA	NA	-0.447187	-0.273283	-0.235545	-0.525747	-0.358143	-0.0398999	-0.164311	-0.125744	NA	NA	NA	NA	NA	NA	-0.339042
ERLEC1	NA	NA	-0.18611	-0.436355	-1.13249	NA	NA	NA	NA	NA	NA	NA	-0.246831	-0.221007	-0.395932	-0.247527	0.163106	-0.413961	-0.0534232	-0.314849	NA	NA	NA	NA	NA	NA	-0.206406
ERLIN2	-0.652535	NA	NA	NA	NA	NA	-0.614738	NA	-0.649762	-0.781934	-0.734563	-0.779307	0.386136	0.267754	0.472877	0.0628183	0.163312	0.398749	0.127366	0.00629005	-0.781719	-0.09372	-0.687411	-0.228707	-0.25566	-0.299988	-0.0976754
ERMP1	-0.439877	-0.576154	-0.690827	-0.544228	-0.568479	-0.992438	NA	NA	NA	NA	-0.290281	-0.506149	-0.218758	-0.0702418	0.617015	0.206065	0.212799	0.169714	0.298621	0.374554	NA	NA	NA	NA	NA	NA	-0.245796
ERO1A	0.584166	0.517064	0.568816	0.351878	0.417927	0.44222	0.463636	0.484161	0.379357	0.37223	0.422065	0.353743	1.21284	1.48727	1.36379	0.822483	0.538089	0.660943	0.584535	0.686494	0.826635	0.914671	0.689659	0.772879	0.861491	0.847362	0.0508097
ERP29	0.590726	0.600806	0.614585	0.588514	0.607611	0.507998	0.554099	0.441569	0.560442	0.537521	0.559612	0.596777	0.970294	0.917099	0.84705	0.936338	0.749321	0.781573	0.944342	0.92051	1.02994	0.336685	0.851881	0.924886	0.874816	0.864273	0.611235
ERP44	0.114792	-0.0164539	-0.0548186	0.259733	0.290284	0.292898	0.46882	0.100372	0.274675	0.279135	0.315945	0.633706	0.745784	0.723221	0.749181	0.646768	0.477396	0.2465	0.379107	0.340687	0.238177	0.397767	0.388647	0.18009	0.230022	0.192873	-0.329527
ERVK3-1	-0.924845	-0.808883	-0.859158	-0.915435	-1.15607	NA	NA	NA	NA	-0.352672	-0.667042	-0.714927	NA	NA	NA	NA	NA	NA	NA	NA	NA	NA	NA	NA	NA	NA	NA
ESD	0.750831	0.724105	0.737579	0.911657	0.706918	0.695404	0.770991	0.700861	0.740108	0.464544	0.450293	0.456952	0.996587	0.794807	0.751006	1.01992	1.17887	1.066	0.985289	1.07103	0.887941	0.716811	0.695145	0.851881	0.796766	0.878086	0.575804
ESF1	-0.556432	NA	-0.684697	NA	NA	NA	-0.41159	-0.578558	-0.558446	-0.592085	-0.701183	-0.839301	-0.051966	-0.0389446	0.0656923	0.0598759	0.0645164	-0.0600555	0.273449	0.114435	NA	NA	NA	NA	NA	NA	-0.482962
ESYT1	1.2297	1.37383	1.22939	1.13751	1.03728	1.17028	1.33212	1.23784	1.3092	1.0326	0.973293	1.03619	NA	NA	NA	1.96082	2.0907	2.07167	2.32896	2.09532	0.499563	0.275488	0.527279	0.476715	0.412391	0.529315	0.61435
ESYT2	0.653713	0.68027	0.685908	0.690516	0.630621	0.564817	0.451059	0.472458	0.462669	0.330439	0.160049	0.21307	0.597613	0.747542	0.734749	0.64459	1.10616	1.03892	1.06374	1.04771	-0.135672	-0.331194	-0.323287	0.0477207	-0.259742	0.0689792	0.19636
ETF1	0.297719	0.325921	0.264065	0.24017	0.269833	0.223897	0.338912	0.324192	0.433607	0.757838	0.627782	0.730806	0.898158	1.00306	1.02053	0.922601	0.530232	0.517772	0.417214	0.495211	0.516434	0.702199	0.734968	0.738434	0.843494	0.81109	-0.23276
ETFA	0.697708	0.691709	0.669609	0.51844	0.647409	0.518192	0.904327	0.883639	0.9704	0.725427	0.784841	0.706576	NA	NA	NA	NA	NA	NA	NA	NA	1.21814	0.818854	1.1023	0.906684	1.03232	0.927982	0.619113
ETFB	0.809338	0.806466	0.658326	0.63327	0.66675	0.644076	0.603944	0.529138	0.821998	0.753151	0.670575	0.932971	0.952301	1.14769	1.17032	0.995385	0.880807	0.843239	0.896057	0.876088	1.20943	1.27991	1.34476	1.00744	0.952698	0.95617	0.690003
ETFDH	-0.514608	-0.208256	-0.478548	-0.413937	-0.319742	-0.253642	NA	-0.60746	-0.847591	-1.1619	NA	-0.808104	0.459974	0.123866	0.313937	0.289093	0.290197	0.255725	0.343858	0.208448	0.592769	-0.0278834	-0.267516	-0.566178	-0.177121	0.4955	-0.183346
ETHE1	0.375746	0.366776	0.484853	0.35971	0.520758	0.484158	0.504546	0.35004	0.369709	0.482713	0.37058	0.415578	0.914417	0.836767	0.785006	0.62146	0.618652	0.768885	0.603964	0.741903	0.862866	0.35309	0.668462	0.709358	0.576127	0.566	0.106241
ETNK1	-0.890726	-1.09081	NA	NA	-0.186624	NA	-0.357132	-0.594182	-0.589119	0.107303	-1.12721	NA	-0.202132	-0.145532	-0.0985119	-0.136858	-0.499879	NA	-0.569113	-0.420445	NA	NA	NA	NA	NA	NA	-0.961855
ETS1	-0.0597677	-1.07821	-0.0685976	0.0623562	-0.283645	-0.383314	0.0204425	0.283725	0.143801	0.354913	-0.371849	0.240165	0.4004	0.333318	0.39302	0.355503	0.269052	0.277164	0.450793	0.301197	0.0271844	0.0773614	-0.266146	-0.324942	-0.141129	-0.237263	0.2495
ETV6	NA	NA	NA	-1.05934	-0.841591	-0.908247	-0.286069	NA	-0.799039	-0.624399	-0.411101	-0.45223	-0.777851	-0.77576	NA	-0.0769789	-0.692313	-0.537788	-0.632133	-0.629828	NA	NA	NA	NA	NA	NA	-0.0344598
EVI2B	-0.226685	-0.211468	-0.290931	-0.445465	-0.216844	-0.171176	-0.877434	-0.8837	-0.776145	NA	-0.945947	-0.734171	-0.531424	-0.468256	-0.416546	-0.325143	0.109551	-0.0153383	0.252168	0.0708875	0.076562	0.116484	0.182499	0.235096	0.089642	0.0553725	-0.527392
EVL	1.57564	1.58763	1.66363	1.47594	1.50977	1.78929	1.12207	1.01446	1.06779	0.667474	0.782674	0.762157	NA	NA	NA	NA	1.7186	NA	1.38646	1.71143	0.994397	1.0974	0.995719	0.939737	0.939737	0.905285	0.948576
EWSR1	0.741462	0.648989	0.714396	0.656853	0.538694	0.522288	0.404984	0.40062	0.422749	0.267186	0.364546	0.293074	NA	0.775992	0.868838	0.925367	0.894957	NA	0.726475	NA	0.598199	0.311537	0.335883	0.336685	0.164017	0.170248	2.15878
EXOC1	-0.290229	-0.284431	-0.410471	-0.242894	-0.459242	NA	-0.149012	-0.0456955	-0.0855016	NA	-0.404737	-0.687259	-0.0748944	-0.0901567	0.0330121	0.0833206	0.258615	-0.00379269	0.226126	0.0795184	-0.742369	-0.329686	-0.359077	-0.86053	-0.922997	-0.907515	-0.555725
EXOC2	-0.147183	-0.289678	-0.219573	-0.256838	-0.582436	-0.326905	-0.0184513	-0.143849	-0.18388	0.0628616	-0.0710279	-0.00341621	0.128416	0.236965	0.282573	-0.0984571	0.0748819	0.119453	-0.0673979	0.180822	NA	NA	NA	NA	NA	NA	-0.411018
EXOC3	-0.33244	-0.539301	-0.529334	-0.463665	-0.360643	-0.385635	-0.644216	-0.718373	-0.578716	-0.857527	NA	-0.635073	0.0343661	0.19636	0.139339	0.147109	0.122506	0.14865	0.0046709	0.0613234	-0.522943	-0.966039	-0.956077	-0.965031	-0.803838	-0.701648	-0.0860396
EXOC4	-0.290229	-0.323494	-0.23195	-0.448451	-0.430965	-0.526772	-0.570548	-0.15253	-0.326749	0.10969	0.0112991	0.206678	0.227941	0.24164	0.278223	0.181836	0.226348	0.289885	0.112968	0.25655	NA	NA	NA	NA	NA	NA	0.341034
EXOC5	-0.351231	-0.528146	-0.416843	-1.01973	-0.998277	-0.744958	-1.05952	-0.848463	-0.995864	-0.461912	NA	-0.858485	-0.222711	0.0637015	0.22416	-0.134726	-0.0978049	-0.142944	-0.248983	-0.133277	-0.599031	-0.471153	-0.41123	-0.911201	-0.478875	-0.858843	-0.512944
EXOC6	NA	NA	NA	NA	NA	NA	NA	NA	NA	NA	NA	NA	-0.176651	-0.232632	-0.275304	-0.310846	-0.207724	-0.421999	-0.484595	-0.390871	NA	NA	NA	NA	NA	NA	-0.783582
EXOC7	-0.274822	-0.323494	-0.450055	-0.232488	-0.641493	-0.564371	-0.220778	NA	NA	-0.561251	-0.728456	-0.789605	0.0398626	-0.0526982	-0.0271579	-0.093655	0.0201451	0.0478822	-0.123569	0.130122	-0.0521183	-0.249777	-0.0150515	-0.0617014	-0.394729	-0.97895	0.683723
EXOC8	-0.330314	-0.361377	-0.481746	-0.205066	-0.993178	-1.01227	-0.44686	-0.504937	-0.566574	-1.11601	-1.38816	-1.22604	-0.0778015	-0.0850411	0.0127791	-0.0420841	-0.0662926	0.195525	-0.147851	0.0165026	-0.706246	-0.787189	-0.919373	-0.827657	-0.842266	-0.877231	-0.125692
EXOG	-0.501506	-0.912079	-0.928897	NA	-1.01385	NA	-0.825811	NA	-1.03418	-1.28476	NA	NA	-0.453469	-0.504806	NA	-0.436027	-0.271311	-0.231493	NA	-0.300422	NA	NA	NA	NA	NA	NA	-0.374566
EXOSC1	-0.308099	-0.0957621	-0.183565	0.0606787	-0.0905751	-0.196753	-0.0514224	-0.136863	-0.090015	-0.0388168	-0.171284	-0.247179	0.394929	0.288382	0.25272	0.279966	-0.025155	0.11245	-0.166142	0.00918104	-0.47255	-0.832141	-0.480093	-0.483492	-0.782017	-0.59162	0.0947963
EXOSC10	0.279983	0.220848	0.275487	0.141517	0.0742683	-0.0189796	0.307137	0.0277536	0.182026	0.0321368	0.0550692	-0.104878	0.505523	0.663893	0.646208	0.533167	0.585053	0.567115	0.693599	0.590641	NA	NA	NA	NA	NA	NA	-0.0482627
EXOSC2	-0.0024653	-0.0447645	-0.0977386	0.0433223	-0.0566078	-0.162919	0.103451	0.209888	0.167614	-0.0405035	-0.487241	-0.035526	0.391676	0.319346	0.324297	0.292879	0.405136	0.453708	0.419848	0.4603	0.0144512	-0.166885	-0.192909	-0.176282	-0.203284	-0.291739	-0.434922
EXOSC3	-0.251793	-0.294405	-0.173295	-0.267089	-0.157977	-0.279552	0.198045	0.3579	0.147282	-0.104959	0.0353365	0.0895285	0.147333	0.229864	0.314786	0.170846	0.249227	0.215988	0.312689	0.25276	-0.347779	0.214175	-0.226885	-1.29752	-0.0721652	-0.319344	1.36486
EXOSC4	-0.465506	-0.377102	-0.350829	0.0606787	-0.0612815	-0.0564591	-0.0184513	-0.111705	-0.117201	-0.186265	0.109467	-0.0261507	0.297457	0.408195	0.332069	0.273651	0.20859	0.289538	0.218644	0.209712	-0.148162	-0.075263	-0.186642	-0.471153	-0.436035	-0.578237	0.0648963
EXOSC5	-0.0835919	-0.132547	-0.0924179	-0.186615	-0.228974	-0.301623	0.355338	0.204742	0.42511	0.211878	-0.0537015	0.0836556	0.0912063	-0.0100493	0.108818	0.29502	0.0184908	0.052304	0.10545	0.132512	-0.638261	-0.605905	-0.53894	-0.81287	-0.964168	-0.751995	0.358605
EXOSC6	-0.0633871	0.0219555	-0.0878063	0.0317032	0.105455	-0.0110394	-0.0333952	-0.223743	0.00727119	-0.124939	-0.155023	0.107664	0.0816714	0.247147	0.303899	0.356822	0.0300356	-0.195327	-0.102244	-0.0191294	0.0346484	-0.193149	-0.283173	0.0253726	-0.218537	-0.0216649	-0.359679
EXOSC7	0.0200427	-0.0186754	0.00321966	-0.0764793	0.00589818	-0.0372034	0.353155	0.261327	0.372812	0.142493	0.0259386	0.0952738	0.225521	-0.0285526	0.118785	0.248653	0.182979	0.311554	0.147423	0.0532879	0.061494	0.158877	-0.115062	-0.182565	-0.103893	-0.202337	0.550977
EXOSC8	-0.216991	-0.277558	-0.406203	-0.354389	-0.372176	-0.331082	-0.04972	-0.139135	-0.0543709	-0.124939	0.0298279	-0.164142	-0.270398	-0.146673	0.134139	0.298112	0.224408	0.286357	0.244347	0.117193	-0.119723	0.0296619	-0.0828292	-0.226244	-0.227733	-0.162506	0.279989
EXOSC9	-0.269091	-0.244944	-0.331741	-0.0129173	-0.216844	-0.27761	-0.0387753	0.0836441	-0.296069	-0.294523	-0.0886707	-0.0333668	0.296192	0.195769	0.176478	0.330336	0.191595	0.0472032	0.190029	0.0588631	-0.286797	-0.34938	0.0448068	-0.188717	0.0599877	-0.0901811	-0.347426
EYA3	NA	NA	NA	NA	NA	NA	NA	NA	-0.694734	NA	NA	NA	-0.573064	-0.469481	-0.525932	-0.342644	-0.184664	-0.627228	-0.215224	-0.176007	NA	NA	NA	NA	NA	NA	-0.995139
EZH2	-1.13746	-1.06137	NA	NA	NA	NA	-0.994847	NA	NA	-0.77334	-1.01205	-1.37919	0.170137	0.282082	0.259095	0.155895	-0.540463	-0.520988	-0.445137	-0.584189	NA	NA	NA	NA	NA	NA	NA
EZR	1.25199	1.32727	1.28562	1.3655	1.61776	1.30242	1.18645	1.21556	1.32597	1.06289	1.01733	0.963162	1.29587	1.35194	1.57045	1.52279	1.24734	1.15947	1.23334	1.19808	1.83984	1.83984	1.88505	1.6878	1.73343	1.78665	1.47352
F11R	-0.635283	-0.408775	-0.473494	-0.274983	-0.280218	-0.544569	-0.520584	-0.496337	-0.400862	-1.02117	NA	-0.608799	-0.206438	-0.431104	-0.324688	-0.375592	-0.175222	-0.0858283	-0.106726	-0.310729	NA	NA	NA	NA	NA	NA	-0.398681
F2	NA	NA	NA	NA	NA	-0.704472	NA	NA	NA	-0.366036	-0.544071	-0.351473	0.792141	0.304458	0.109583	0.413673	0.371008	-0.206391	1.07794	0.946129	NA	NA	NA	NA	NA	NA	0.324724
F8A3	-0.53981	-0.801804	-0.606116	-0.468104	NA	NA	NA	NA	NA	NA	NA	-1.01468	NA	NA	NA	NA	NA	NA	NA	NA	NA	NA	NA	NA	NA	NA	NA
FABP5	0.350344	0.343261	0.309628	0.471208	0.30965	0.206102	0.766976	0.818201	0.759861	0.891759	0.82719	0.762157	1.9132	1.79163	1.64322	1.18923	0.208048	0.261324	0.183383	0.315208	0.37986	0.237476	0.313025	0.978804	0.959245	1.01091	0.770586
FADD	-0.328312	-0.057408	-0.139651	-0.282063	-0.36238	NA	-0.24042	-0.280488	-0.25964	-0.209116	-0.450259	-0.454888	0.240966	0.460546	0.182656	-0.0667919	0.220641	0.323799	0.246677	0.383357	-0.248632	-0.0957275	-0.246287	-0.463971	-0.448407	-0.61211	0.672207
FAF1	-0.475299	-0.496546	-0.54879	-0.432285	-0.681027	-1.05222	-0.433044	-0.402525	-0.299298	NA	-0.994715	-0.795104	0.501567	0.362627	0.28358	0.0608161	0.0260199	0.133441	0.149413	0.0359457	0.0753372	-0.0849186	-0.386502	-0.0698509	-0.527886	-0.268733	0.174957
FAF2	-0.12735	0.0456054	-0.0525302	-0.309669	-0.260704	-0.597657	-0.0750326	-0.091534	0.0348626	-0.183742	-0.0747382	-0.150644	0.118834	0.239327	0.247984	-0.00865641	0.293276	0.292911	0.372944	0.232458	NA	NA	NA	NA	NA	NA	-0.290997
FAH	-0.71493	-1.05829	-0.336156	-0.844255	-0.749278	-0.740071	-0.319056	-0.147261	-0.036703	-0.16283	-0.117643	-0.369774	0.487668	0.494948	0.448156	0.409499	-0.11887	-0.242386	-0.332246	0.00103656	-0.563882	-0.153949	-0.757476	-0.67843	-0.777363	-0.682816	-0.334369
FAHD1	-0.103168	-0.0729338	-0.0899676	-0.186615	0.0360879	0.143736	0.158167	0.158352	0.109951	0.0336334	-0.100528	-0.290033	0.068368	-0.141053	-0.158151	0.163033	0.0893293	0.150018	0.22222	0.146935	-0.705666	-0.73457	-0.816468	-0.52407	-1.02475	-1.01415	0.372247
FAHD2A	0.150495	0.0697636	0.0427725	-0.0679423	-0.01634	0.00704121	0.00563431	-0.0186296	-0.126058	-0.475662	0.0321337	0.00887559	0.314534	0.20071	0.244637	-0.207981	-0.179461	-0.0999228	-0.281759	-0.0908052	NA	NA	NA	NA	NA	NA	-0.491879
FAM102A	NA	-1.2367	-0.706979	-0.616117	-0.509316	-0.315779	NA	-1.22164	-0.963682	NA	NA	NA	-0.445091	NA	-0.670198	-0.364493	-0.22128	-0.132717	-0.196648	-0.102043	-0.0416415	0.029177	-0.17583	-1.10856	-0.372322	-0.796556	-0.194236
FAM107B	0.434322	0.460687	0.42086	0.33468	0.487398	0.350694	-0.220778	-0.275192	-0.242652	0.124163	0.215557	0.170596	0.495689	0.558134	0.495801	0.39225	0.614841	0.725382	0.777451	0.567103	0.738434	0.417212	0.770551	0.686681	0.702199	0.654651	0.00731461
FAM111A	NA	NA	NA	-0.941216	-0.666382	NA	NA	NA	-1.20436	-0.434734	-0.143638	NA	-0.282859	-0.206349	-0.291141	0.0555	-0.369252	-0.243562	-0.42536	-0.360443	NA	NA	NA	NA	NA	NA	-0.607169
FAM114A2	-0.135697	-0.232199	-0.253007	-0.184291	0.0189156	-0.118341	-0.360075	-0.344924	-0.679852	-0.424373	-0.272689	-0.479774	0.416592	-0.0330984	-0.0184695	-0.0857251	0.053649	0.288771	-0.026336	0.223309	0.304875	0.259624	-0.0353182	0.0599877	0.087474	0.127608	0.328653
FAM118A	-0.914878	-0.73978	-1.12838	NA	NA	NA	NA	NA	NA	-1.14574	NA	NA	-0.762518	-1.17996	-0.571412	-0.705035	-0.316437	NA	-0.510729	-0.322208	NA	NA	NA	NA	NA	NA	-0.18402
FAM120A	0.478741	0.421833	0.394262	0.561256	0.487398	0.451572	0.516137	0.541359	0.546534	0.358532	0.422065	0.307613	0.899493	0.967802	0.962147	1.01579	0.774608	0.687725	0.716324	0.76736	-0.319737	-0.0331975	-0.167175	-0.0748587	0.105233	-0.010535	0.242606
FAM120B	-0.620427	-0.535268	-0.78561	-0.549728	-0.766572	-0.677791	-1.05952	-0.693635	NA	-1.10451	-0.989906	-1.19153	-0.152238	-0.0189171	-0.0732355	-0.246411	0.361898	0.35911	0.126547	0.201345	NA	NA	NA	NA	NA	NA	-0.617623
FAM126B	NA	NA	NA	NA	NA	NA	-0.598091	-0.659858	-0.597888	NA	NA	NA	-0.462027	-0.407954	-0.747508	NA	-0.390202	-0.307556	-0.342112	-0.370558	NA	NA	NA	NA	NA	NA	-0.581912
FAM129A	0.182313	0.0582776	0.150614	0.252798	0.251254	0.226707	0.255777	0.300401	0.363864	0.0427693	0.175141	0.0928139	NA	NA	NA	NA	NA	NA	NA	NA	NA	NA	NA	NA	NA	NA	NA
FAM129B	-0.944743	-0.684128	-0.6625	-0.402909	-0.48186	-0.346502	NA	NA	NA	NA	NA	NA	NA	NA	NA	NA	NA	NA	NA	NA	NA	NA	NA	NA	NA	NA	NA
FAM133B	-0.594747	-1.00732	-0.61144	-0.503568	-0.720456	-0.585102	-0.949288	-0.840091	NA	NA	NA	NA	-0.645815	-0.456139	-0.394799	-0.38837	-0.626677	-0.66685	-0.573792	-0.67752	NA	NA	NA	NA	NA	NA	-0.623285
FAM136A	NA	NA	NA	NA	NA	NA	NA	NA	-1.04671	-0.613646	-0.663912	-0.566283	0.359773	0.116535	0.0170197	0.215923	-0.499909	-0.528847	-0.28707	-0.203613	-0.678049	-0.669199	-0.720072	-0.740943	-0.543367	-0.754366	-0.0607372
FAM160B1	-0.659455	-0.533125	-0.539599	-0.294697	-0.400598	-0.445198	-0.267851	-0.35939	-0.443682	NA	-0.873751	NA	-0.0701709	-0.135939	0.27398	-0.117182	-0.18753	-0.156743	-0.0174876	-0.0581498	NA	NA	NA	NA	NA	NA	-0.156821
FAM162A	0.417561	0.19922	0.233672	0.114957	0.149727	-0.0151841	-0.0252256	0.114408	0.0200816	0.124163	0.104863	0.0477734	0.288817	0.54606	0.629559	0.287256	0.6843	0.394414	0.425258	0.326079	0.315251	0.198596	-0.0675031	0.367802	0.344423	0.258682	-0.0298816
FAM169A	0.29141	0.331898	0.258291	0.184549	0.187534	0.155019	-0.00613694	-0.0162498	-0.114747	-0.653944	-0.500458	-1.02772	-0.582015	-0.535578	-0.847487	0.089994	0.202975	0.375115	0.419848	0.33874	-0.312623	-0.079924	-0.107014	-0.493508	0.0468542	-0.363917	0.0461645
FAM172A	-0.947779	-0.578639	-0.643956	-0.455542	-0.98915	NA	-0.960391	-1.05618	-0.810619	NA	-0.600101	-0.86648	-0.451347	-0.73317	-0.849156	-0.764411	-0.290492	-0.135212	-0.282494	-0.240321	NA	NA	NA	NA	NA	NA	-0.389293
FAM192A	-0.471507	-0.514227	-0.440443	-0.806056	-0.683655	-0.533789	-0.473656	-0.583162	-0.555329	-0.414951	-0.2086	-0.20067	NA	NA	NA	NA	NA	NA	NA	NA	NA	NA	NA	NA	NA	NA	NA
FAM207A	NA	NA	NA	NA	-1.26971	NA	-0.58639	-0.786312	-0.466048	-0.204651	-0.24502	-0.489282	-0.200875	-0.0898194	-0.13311	-0.321459	-0.590324	NA	-0.695676	NA	NA	NA	NA	NA	NA	NA	-0.25921
FAM241A	NA	NA	NA	-0.976584	NA	NA	-0.996708	-0.782017	-1.0144	-0.723593	-0.74057	-0.62583	-0.585511	-0.763906	-0.634512	-0.312206	-0.845254	-0.464271	-0.748978	-0.571047	-0.651489	-0.98579	-0.719347	-0.748681	-1.07107	-0.914019	NA
FAM32A	-0.369352	-0.467304	-0.497161	-0.635597	-0.49131	NA	-1.06428	-0.40657	-0.564202	-0.475662	-0.781581	-0.582288	-0.703559	NA	-0.992698	-0.417362	-0.12261	-0.205425	-0.220652	-0.0197149	NA	NA	NA	NA	NA	NA	0.348303
FAM3C	NA	NA	NA	NA	NA	NA	-0.797853	-0.828772	NA	-0.691595	-0.721714	-0.684438	-0.685263	-0.145334	0.312284	-0.0451483	-0.0697281	0.656499	0.0831728	-0.00457446	-0.720631	-0.972445	-0.833939	-0.972445	-0.98287	-1.11234	-0.330765
FAM45BP	-0.51704	-0.978289	-0.695492	-0.896951	NA	-0.695618	NA	NA	-0.689925	NA	NA	-0.801635	NA	NA	NA	NA	NA	NA	NA	NA	NA	NA	NA	NA	NA	NA	NA
FAM49B	1.00448	0.962266	0.948859	1.06499	0.789472	0.751143	0.957537	1.00395	0.959783	0.722917	0.755216	0.740249	NA	NA	NA	NA	NA	NA	NA	NA	NA	NA	NA	NA	NA	NA	NA
FAM50A	-0.033026	-0.00103135	-0.355892	-0.0679423	-0.354907	-0.58935	-0.274716	-0.361851	-0.229979	0.129448	0.196205	0.0324097	0.2129	0.0427883	0.104386	0.217185	0.0443858	0.00197202	-0.055033	-0.00582778	-0.019847	-0.394037	-0.240369	0.118194	-0.00457749	-0.437202	0.269745
FAM53C	NA	NA	NA	NA	NA	NA	-1.25281	NA	-1.2096	NA	NA	NA	-0.695529	-0.738151	-0.73649	NA	NA	NA	NA	NA	NA	NA	NA	NA	NA	NA	-0.138779
FAM76B	-0.834171	-0.836601	-0.652359	-0.909738	-0.854415	NA	-1.00619	-1.03306	-0.773498	-0.748161	NA	NA	-1.14687	-1.08723	-0.778665	-0.635957	-0.510847	-0.266859	-0.331954	-0.192644	NA	NA	NA	NA	NA	NA	0.0554766
FAM91A1	-0.670234	-0.94066	NA	-0.60771	-0.39933	-0.376717	-0.407137	-0.153941	-0.237988	-0.432379	-0.564038	-0.477207	0.171309	0.166272	0.151235	-0.190553	-0.193862	-0.386745	-0.43054	-0.284293	-0.396661	-0.752542	-0.855245	-0.387747	-0.357601	-0.429031	-0.829511
FAM98A	-0.399689	-0.767147	-0.577368	-0.889667	-0.939547	NA	-0.222125	-0.314139	-0.07039	0.251691	-0.107527	-0.161691	0.149603	0.162526	0.220326	0.188325	-0.231453	-0.0868449	-0.115828	0.121612	NA	NA	NA	NA	NA	NA	-0.433316
FAM98B	1.7639	1.82776	2.48231	1.5916	2.5332	1.97297	0.266017	0.668867	0.621733	0.263161	0.329019	0.190166	0.359773	0.398947	0.376607	0.537393	0.918752	0.797554	0.89676	0.806851	0.733227	0.903271	0.834751	0.502062	0.556495	0.386787	0.726093
FAM98C	NA	NA	-0.907312	-0.610524	-0.827068	NA	-1.05674	-1.01809	-1.10213	NA	NA	NA	-0.624892	-0.767367	-0.533679	-0.837702	-0.302544	-0.672514	-0.385165	-0.788132	NA	NA	NA	NA	NA	NA	-0.0359994
FANCD2	NA	NA	NA	NA	NA	NA	-0.777864	-0.923937	-0.782028	NA	-0.923854	NA	0.119487	0.133559	0.0739966	0.359884	NA	NA	NA	-0.847183	NA	NA	NA	NA	NA	NA	NA
FANCI	NA	NA	NA	NA	NA	NA	-0.245605	-0.410245	-0.482499	-0.228847	-0.886811	-0.325036	0.604082	1.51778	1.44916	0.655393	-0.901105	-0.732319	-1.10625	-0.977506	NA	NA	NA	NA	NA	NA	NA
FARS2	-0.789073	NA	NA	-0.465684	-0.691804	-0.868098	-0.833901	NA	NA	NA	NA	NA	-0.478809	-0.385696	-0.602072	-0.486941	-0.240391	-0.299726	-0.168823	-0.170676	NA	NA	NA	NA	NA	NA	0.0473989
FARSA	0.423725	0.317482	0.374924	0.506252	0.453935	0.421134	0.668397	0.818201	0.862653	0.553817	0.481967	0.533658	0.728399	0.830935	0.899116	0.651924	0.790757	0.810069	0.594842	0.806221	0.494702	0.579789	0.449269	0.354086	0.388025	0.431959	0.118639
FARSB	0.58683	0.591716	0.598862	0.74558	0.626359	0.5436	0.706256	0.786938	0.799782	0.783106	0.635974	0.77436	0.972121	1.20177	1.18532	1.01461	0.914283	1.06136	0.845685	0.934914	0.668462	0.797387	0.443757	0.465827	0.520406	0.461423	0.509191
FAS	-0.851693	NA	NA	-0.734891	-0.427552	-0.519002	-0.160442	-0.385983	-0.129662	-0.424373	-0.366963	-0.278296	-0.229159	-0.277142	-0.0307132	-0.16506	-1.12391	-1.04659	-0.40529	NA	-0.0837564	-0.0521183	0.059375	0.087474	0.0968077	0.141226	NA
FASN	0.24242	0.218633	0.110134	0.104542	0.0705427	0.155019	1.01893	0.749293	0.961431	1.07749	1.15759	1.08164	1.95272	2.53362	2.06833	1.92217	0.624855	0.569828	0.454914	0.553317	0.198106	0.0353952	0.120422	1.26889	1.15589	1.20623	0.02332
FASTKD1	-1.127	NA	-1.14636	-0.87162	NA	NA	NA	-0.98467	-0.730824	-0.824362	NA	NA	-0.589135	-0.363356	-0.26961	-0.215887	NA	-0.692015	-0.668696	-1.01272	NA	NA	NA	NA	NA	NA	NA
FASTKD2	-1.00199	-0.689015	-0.977311	NA	-1.47755	-1.07113	-0.0899552	-0.404752	-0.150963	0.0859833	-0.00986063	-0.120282	-0.0895494	-0.0678983	-0.0107884	0.203006	-0.367544	-0.311595	-0.269577	-0.349012	NA	NA	NA	NA	NA	NA	-0.519813
FASTKD5	NA	NA	NA	NA	NA	NA	NA	NA	-1.05281	-0.489508	NA	-0.543362	0.0805813	0.140477	0.236349	0.309405	-0.112893	-0.20948	-0.0873892	-0.0399888	NA	NA	NA	NA	NA	NA	-0.76002
FBH1	NA	NA	NA	NA	NA	NA	NA	-0.671401	NA	NA	NA	NA	-1.29214	-0.741868	NA	-0.471711	-0.591135	-0.471726	-0.615886	-0.655343	NA	NA	NA	NA	NA	NA	-0.90622
FBL	1.43701	1.48568	1.45128	1.27929	1.42099	1.64952	1.37731	1.05476	1.38814	1.48475	1.31171	1.39922	1.34635	1.26027	1.33771	1.25389	1.73542	1.54666	1.53022	1.50883	NA	NA	NA	NA	NA	NA	1.3112
FBLL1	0.420531	0.444417	0.408099	0.372682	0.386916	0.364968	0.290338	0.195977	0.182026	0.500206	0.526886	0.489095	0.513598	0.492872	0.509641	0.410063	0.623968	0.540711	0.676902	0.615079	NA	NA	NA	NA	NA	NA	NA
FBP1	0.24242	0.217503	0.237046	0.357513	0.253521	0.204233	0.272294	0.12539	0.309591	-0.0296316	-0.279991	0.0324097	-0.309629	-0.461987	-0.343634	-0.555297	0.661296	0.795196	0.564987	0.582775	0.559816	0.494702	0.630547	0.100715	0.478423	0.383648	0.467862
FBP2	-0.43558	-0.571384	-0.395265	-0.461053	-0.236387	-0.39797	NA	NA	NA	NA	NA	NA	-0.84144	NA	-0.873625	NA	-0.321752	-0.376274	-0.483307	NA	0.0563686	-0.341732	-0.970366	0.0257217	0.0106664	-0.019847	-0.110179
FBXL8	-0.473105	-0.821917	-0.763447	-0.333918	-0.459242	-0.456432	NA	NA	NA	NA	NA	-0.976072	-0.543136	-0.248995	-0.55315	-0.8939	-0.598321	-0.418992	-0.7328	-0.726235	NA	NA	NA	NA	NA	NA	-0.967484
FBXO2	-1.03347	NA	NA	-0.678174	-0.911993	-1.0594	-0.644216	NA	NA	NA	-0.806009	-0.971409	NA	-0.950581	-0.652745	-0.652382	-0.323697	-0.0458859	-0.271039	0.0201627	NA	NA	NA	NA	NA	NA	-0.399349
FBXO22	-0.711695	-1.10714	NA	-0.833943	-0.681027	-0.623249	NA	NA	-0.368897	-0.448156	-0.746365	NA	0.116772	-0.0690038	-0.0068838	-0.426286	-0.0922704	-0.175266	-0.235747	-0.0408894	NA	NA	NA	NA	NA	NA	0.257054
FBXO3	-0.409533	-0.193331	-0.62164	-1.11189	-1.21385	NA	-0.488876	-1.11334	-0.673824	NA	NA	NA	-0.805212	-0.72978	-0.694058	-0.549675	-0.300429	-0.356007	-0.270061	-0.275768	NA	NA	NA	NA	NA	NA	-0.141089
FBXO38	-1.04478	-1.21274	-0.855378	-0.99358	-1.23882	NA	-0.545274	-0.835944	-0.699886	-1.05618	NA	NA	NA	-0.618669	-0.237501	-0.604262	0.0262458	-0.0568549	-0.231915	-0.117525	NA	NA	NA	NA	NA	NA	-0.539227
FBXO6	NA	NA	NA	NA	NA	NA	NA	NA	NA	NA	NA	NA	NA	-0.116389	-0.279091	-0.217003	-0.548007	-0.413855	-0.841544	-0.435163	NA	NA	NA	NA	NA	NA	-1.67908
FBXO7	-0.6544	-0.550128	-0.53668	-0.725981	0.240376	-0.54067	-0.856494	0.325562	-0.271054	-0.396896	NA	-0.554393	0.0607243	0.0603998	0.135395	-0.187844	0.00112619	-0.0357376	-0.121024	-0.0748215	NA	NA	NA	NA	NA	NA	0.746979
FBXW11	NA	NA	NA	NA	NA	NA	-0.604659	-0.66703	-0.633939	NA	NA	NA	-0.538134	-0.349332	-0.279873	-0.473247	-0.329825	-0.0904755	-0.110167	-0.222072	NA	NA	NA	NA	NA	NA	0.0695532
FBXW2	-1.44205	NA	-0.931923	-0.933836	-0.775206	-0.620082	NA	NA	NA	NA	NA	NA	NA	-0.827336	NA	NA	-0.263702	-0.258986	-0.518252	-0.296963	NA	NA	NA	NA	NA	NA	-0.13484
FCF1	-0.624592	-0.418877	-0.931923	-0.472618	-0.275629	-0.408107	-0.812201	-0.761587	-0.761966	-0.504255	-0.608233	-0.586359	-0.205869	-0.0826714	-0.168258	-0.050893	0.0497283	0.0219806	0.0509698	-0.042963	NA	NA	NA	NA	NA	NA	-0.477108
FCHO1	-0.366188	-0.433527	-0.448429	-0.226288	-0.218808	-0.352786	-0.936078	NA	NA	-0.803321	-0.954202	-0.872714	-0.0809039	-0.265395	-0.071642	-0.105798	0.062074	0.10273	-0.0274693	0.111106	-0.36211	-0.160442	-0.344633	-0.538547	-0.350487	-0.528525	-0.404718
FCHSD1	-0.510725	-0.127693	-0.208776	-0.848648	NA	-0.574637	-0.665159	-0.730001	-0.404728	-0.653944	-0.56175	NA	-0.574219	-0.845454	-0.915911	-0.535102	-0.0132367	0.0538597	-0.115558	0.109495	0.0473267	-0.692556	0.129084	-0.0866887	-0.177996	-0.240369	-0.530597
FCMR	-1.02006	NA	-0.960035	-0.618617	-0.789243	-0.828169	NA	NA	NA	NA	NA	NA	NA	NA	NA	NA	NA	NA	-1.11068	NA	NA	NA	NA	NA	NA	NA	NA
FCN1	NA	NA	NA	-0.632232	NA	NA	NA	NA	NA	NA	NA	NA	-1.25897	-0.355737	-1.17139	-0.865233	NA	-0.871972	-0.693782	-0.924071	-0.967174	-0.601253	-0.806087	-0.947084	-1.01806	-0.629813	NA
FCSK	-0.707175	-0.622803	-0.6272	-0.39443	-1.14156	-0.519002	-0.678142	-0.583162	-0.454484	-0.86091	NA	NA	-0.331029	-0.393678	-0.772698	-0.559104	0.0167131	0.0252842	-0.221676	0.266731	-0.433494	-0.170763	-0.654589	-0.499014	-0.534802	-0.555026	-0.329136
FDFT1	NA	NA	NA	NA	-1.14156	NA	-0.5013	-0.459343	-0.410861	-1.00131	-0.931682	NA	0.0615319	0.387707	0.34948	0.0468198	-0.564415	-0.495634	-0.306882	-0.31769	NA	NA	NA	NA	NA	NA	-0.874917
FDPS	0.104242	0.139177	0.145201	0.4902	0.381053	0.292898	0.314348	0.322501	0.250387	0.0169766	0.0259386	0.042717	0.835047	0.711813	0.847773	0.694009	0.535714	0.372758	0.374596	0.467799	0.175758	-0.963422	-0.589629	0.290736	0.100212	0.263395	0.361734
FDXR	-0.236998	-0.232199	-0.262708	-0.425567	-0.448421	-0.391385	-0.291466	-0.671401	-0.889454	NA	-0.109653	-1.15736	0.183952	0.134838	0.252174	0.375508	0.314048	0.337085	0.370893	0.356822	-0.0957275	0.0899372	0.0807198	-0.413824	-0.581348	-0.399765	0.473282
FECH	-0.105688	0.0251562	0.00321966	-0.0399884	-0.323176	-0.334258	-0.140601	-0.431122	-0.784009	-0.417308	-0.778144	-0.8485	0.0840537	0.110932	0.208346	0.218181	0.528167	0.58858	0.356472	0.522407	0.0849619	-0.136625	-0.0849186	-0.367883	-0.2838	-0.0890474	0.335066
FEN1	0.255438	0.386071	0.309628	0.303367	0.27363	0.296622	0.566968	0.550812	0.66214	0.715246	0.603659	0.616963	1.14693	1.20177	1.26112	0.970565	0.587593	0.500439	0.399083	0.458652	-0.0583873	0.367802	-0.00116466	-0.0271824	0.307323	0.116484	0.0784219
FERMT3	1.26583	1.2922	1.29172	1.17149	1.35866	1.10705	1.19794	1.2927	1.4198	1.02418	1.18488	1.08953	NA	NA	NA	NA	NA	1.44559	NA	NA	1.08147	1.16066	0.76092	1.20328	1.1803	1.21814	0.609099
FGA	NA	NA	NA	NA	NA	NA	-0.568498	-1.42241	NA	-1.16674	NA	-0.69552	-0.667705	-0.644602	-0.670775	0.0540594	-0.32744	-0.42536	-0.16076	-0.0892959	-1.52183	-1.81621	-1.52183	-1.60555	-1.55628	-1.4972	1.44532
FGD3	0.324703	0.407348	0.350098	0.173828	0.412782	0.347482	0.270403	-0.00435997	0.118584	0.0859833	0.0149739	0.0627386	NA	NA	NA	NA	NA	NA	NA	NA	0.395955	0.525914	0.457869	-0.0512804	-0.0206479	-0.104513	-0.493131
FGFR1OP2	-0.103168	-0.119952	-0.129679	-0.245466	-0.199897	-0.301623	-0.296658	-0.13159	-0.000949028	-0.534924	NA	-0.81558	-0.121121	-0.118262	-0.371675	-0.0834242	0.111478	0.0121037	0.240728	0.0218558	-1.12695	-0.0945895	-0.145042	-0.364441	-0.274851	-0.599645	-0.19651
FGG	-1.29227	NA	NA	-1.17999	NA	NA	-0.785242	-0.931932	-0.650924	-0.256198	-0.883222	-0.411617	0.0802896	-0.0984573	-0.203051	-0.472441	-0.737859	-0.821921	-0.00370104	-0.205227	-0.433957	-0.00664699	-0.64313	-0.869863	-0.988052	-0.705666	1.27366
FH	0.568967	0.511463	0.584575	0.559173	0.495544	0.533159	0.57511	0.443943	0.599725	0.513454	0.54376	0.514556	0.979946	0.963592	0.985178	0.821297	0.68379	0.760475	0.61793	0.716856	0.720087	0.933833	0.950488	0.623365	0.779358	0.644681	0.500844
FHL1	0.413066	0.427816	0.377682	0.314271	0.373954	0.353161	0.0326282	0.155769	0.0831932	-0.231818	-0.132377	-0.280837	0.59802	0.215763	0.317944	0.0173366	0.602154	0.516943	0.519331	0.216666	0.563612	0.512666	0.604699	0.400628	0.398521	0.446705	0.413806
FHOD1	-0.880218	-0.819742	-0.686785	-0.622245	-0.49131	-0.95592	-0.326934	-0.459343	-0.209938	-0.566493	-0.521697	-0.689451	0.153266	0.359808	0.422499	0.261682	-0.207724	-0.374741	-0.218772	-0.0456424	-0.22528	-0.202186	-0.721094	-0.466463	-0.0477068	-0.499014	-0.0580574
FIBP	-0.45963	-0.217175	-0.273437	-0.263038	-0.468321	-0.490128	-0.529792	-0.248409	-0.316522	-0.547223	NA	NA	-0.25972	-0.354111	-0.141167	-0.0696128	-0.249371	-0.125319	-0.287629	-0.173126	NA	NA	NA	NA	NA	NA	0.24727
FIP1L1	-0.122849	-0.123534	-0.0706254	-0.0907565	-0.0393981	-0.0987116	-0.104466	-0.196458	-0.102895	0.30558	0.0259386	0.042717	0.438741	0.378145	0.387452	0.418348	0.427195	0.468387	0.507353	0.418792	NA	NA	NA	NA	NA	NA	1.37158
FIS1	-0.0687086	0.0340182	-0.0572884	-0.110699	-0.228974	0.0933162	0.00805159	0.0517246	-0.00942603	0.182497	0.166818	0.261611	0.350415	0.455922	0.4367	0.260873	0.485224	0.417572	0.446185	0.49634	0.267421	0.1765	0.139633	-0.032201	0.0773614	0.113955	-0.106531
FKBP11	-0.369352	-0.193331	-0.367722	-0.165138	-0.570584	-0.425066	0.198045	0.389447	0.436763	0.140639	-0.0459457	0.0863251	0.0403235	0.146545	0.144541	0.258602	0.217396	0.0926104	0.300752	0.218657	NA	NA	NA	NA	NA	NA	0.265107
FKBP15	-0.0262273	-0.202512	-0.25759	-0.0585445	-0.160963	-0.625118	-0.203239	-0.246451	-0.285185	0.182497	-0.13819	0.0298605	0.29145	0.290788	0.392278	0.292793	0.225461	0.216882	0.202868	0.294682	-0.0536568	0.152637	0.18973	-0.134911	-0.171158	-0.207066	0.0560759
FKBP1A	0.505247	0.538271	0.506683	0.541	0.641897	0.487047	0.214937	0.244304	0.277763	0.30283	0.188432	0.290732	1.08074	0.942142	0.845592	0.858391	0.835236	0.578248	0.733519	0.614537	0.525914	0.343231	0.314762	0.58836	0.428773	0.501127	0.980273
FKBP2	0.137108	0.245007	0.193583	0.272502	0.11232	0.0511956	0.072564	0.0793251	0.0610363	-0.096308	-0.269794	-0.081731	0.0142337	-0.0349178	0.0321211	0.140861	0.328619	0.164261	0.254125	0.276995	-0.0894612	-1.09935	-0.751995	-0.135585	-0.100468	-0.0536568	0.17015
FKBP3	0.641675	0.661523	0.647842	0.506252	0.465568	0.358609	0.274081	0.256507	0.202288	0.1049	0.221879	0.221706	0.631627	0.786008	0.722524	0.633209	0.57523	0.582158	0.421569	0.551537	0.497377	0.360937	0.599197	0.536701	0.49805	0.498709	0.43735
FKBP4	0.213319	0.328342	0.295408	0.192884	0.39479	0.342701	0.738363	0.692463	0.694512	0.729303	0.749073	0.771836	1.4901	1.58663	1.37252	1.15843	0.582996	0.583524	0.567652	0.60527	0.850164	0.909886	0.889637	1.21814	1.34884	1.3667	0.396411
FKBP5	0.562464	0.549087	0.571415	0.672026	0.690452	0.55573	0.475082	0.497593	0.457112	0.279135	0.340194	0.312022	0.836213	0.920508	0.897752	0.840861	0.757704	0.728471	0.718952	0.779423	1.02374	1.11762	1.0567	0.931086	0.927982	0.874816	0.645163
FKBP8	-0.243667	-0.151488	-0.308594	-0.0537484	0.0189156	-0.0372034	-0.0899552	0.0715849	0.0942771	-0.0649166	0.051926	0.11119	0.708911	0.778036	0.838675	0.572816	0.284101	0.328149	0.41014	0.339059	0.0937051	-0.431005	-0.223965	0.208012	0.145326	0.0657405	0.330271
FLAD1	-0.311145	-0.30551	-0.204438	-0.559753	-0.651385	-0.672918	0.0900384	-0.221864	-0.126058	-0.193119	-0.259726	-0.256479	-0.100789	-0.30012	-0.0977625	-0.411405	0.348182	0.309105	0.273728	0.305292	-0.659619	-0.841136	-0.293706	-0.194885	-0.568888	-0.183344	0.234506
FLI1	0.128845	0.0804685	0.0832431	-0.112922	0.120444	0.0343599	-0.0213857	-0.136863	-0.282575	-0.115754	0.0907287	-0.0905428	NA	NA	NA	NA	0.332318	0.244144	0.218043	0.268097	NA	NA	NA	NA	NA	NA	0.936706
FLII	0.656116	0.633847	0.629949	0.674749	0.58551	0.591688	0.787291	0.688558	0.759861	0.640935	0.613875	0.661997	0.917891	NA	NA	NA	NA	NA	NA	NA	0.837141	0.814364	0.81605	0.770551	0.808046	0.763516	0.562606
FLNA	3.20801	3.09129	3.34903	2.93969	3.11443	3.07466	2.48089	2.41752	2.53292	2.205	2.30103	2.37703	3.10058	3.82301	3.95422	4.59578	4.57191	4.57951	3.58922	4.23358	3.93856	3.69156	4.13562	3.2565	3.09303	3.2565	1.1406
FLNB	0.651881	0.685257	0.614585	0.973769	0.779728	0.744946	0.419784	0.412586	0.521706	0.239601	0.546232	0.329703	NA	NA	NA	0.983264	1.69641	1.40516	1.62423	1.43367	0.718996	1.00212	0.95617	0.627163	0.848716	0.655879	0.552469
FLOT1	0.381073	0.412746	0.430579	0.386126	0.318033	0.262367	0.424662	0.328183	0.489636	0.507124	0.397505	0.496302	0.94977	0.944726	1.08396	0.71903	0.973165	0.824139	0.971351	0.864464	-0.493508	-0.25566	-0.313279	-0.465894	-0.532986	-0.50289	0.325286
FLOT2	0.409874	0.366776	0.408099	0.191499	0.278593	0.0773141	0.255777	0.14403	0.153029	0.313244	0.489575	0.325369	0.66888	0.655001	0.723955	0.684648	0.827465	0.665376	0.820157	0.709955	-0.199644	-0.430093	-0.513105	-0.37662	-0.689724	-0.464823	-0.0876435
FLYWCH2	-0.0024653	-0.0828788	0.00875046	-0.119534	0.0852211	-0.0673587	-0.229442	-0.324055	-0.271054	-0.619462	-0.450259	-0.416796	-0.0498069	-0.00634421	-0.121089	0.0875167	0.299753	0.264016	0.307821	0.359604	0.301695	0.0685201	0.250116	-0.00712842	0.0867112	0.0778767	0.579988
FMNL1	1.03308	1.00046	1.00899	0.855197	0.853968	0.851049	0.882147	0.724621	0.812046	0.770784	0.922146	0.77833	0.776076	1.0753	1.1525	1.0074	1.18031	1.13554	1.18274	1.12932	0.49208	0.511615	0.757755	0.491452	0.500266	0.48103	0.40716
FMR1	-0.164722	-0.105214	-0.424164	-0.250136	-0.483298	-0.711475	-0.274716	-0.216632	-0.167705	-0.206542	-0.652405	-0.343197	NA	0.167059	NA	0.267798	NA	NA	NA	NA	-0.423829	-0.62012	-0.679008	-0.596671	-0.363821	-0.551565	0.551859
FN1	NA	-1.19778	NA	NA	NA	NA	0.263671	0.339267	0.361757	0.535757	0.499303	0.484964	0.0392459	-0.275614	-0.477867	-0.109954	-0.251815	-0.334249	0.820766	0.656651	0.0353952	-0.125523	-0.155487	-0.454304	-0.152888	-0.190413	1.66663
FN3K	-0.933083	NA	-0.750766	NA	NA	NA	NA	NA	NA	-0.928753	NA	NA	-0.984172	-0.635479	-0.376529	-0.993208	-0.360168	-0.429159	-0.773147	-0.298995	NA	NA	NA	NA	NA	NA	-0.352523
FN3KRP	0.213319	0.275104	0.0981771	0.400249	0.468203	0.465264	0.122645	0.091992	0.0877636	-0.0492669	0.00867094	-0.292766	0.182678	0.195404	0.212418	0.127053	0.326265	0.366291	0.145935	0.414617	0.323285	0.251637	0.0179825	0.0849619	0.159513	-0.000523389	-0.0990121
FNBP1	0.565367	0.587621	0.697729	0.588514	0.760055	0.628224	0.399568	0.261327	0.25227	0.418828	0.476799	0.415578	0.852658	0.802184	0.8363	0.816359	0.820573	0.884702	0.868359	0.774226	0.980708	1.26889	1.16608	0.974828	1.00389	1.00744	0.10823
FNBP4	-0.293034	-0.339265	-0.57893	-0.491692	-0.513818	-0.809561	NA	NA	-0.622226	NA	NA	NA	0.0602761	0.15374	0.109779	0.114904	0.188874	0.274169	0.218444	0.181992	NA	NA	NA	NA	NA	NA	-0.640994
FNDC3A	-0.985111	NA	-0.894392	NA	NA	NA	-0.520584	-0.533519	-0.631851	NA	NA	NA	0.235302	0.271904	0.176005	0.142046	0.380665	0.0711602	0.332883	0.499781	NA	NA	NA	NA	NA	NA	-0.734598
FNTA	-0.228628	-0.118486	-0.0950422	-0.352146	-0.588533	-0.394635	-0.0899552	-0.277741	0.100429	-0.228847	-0.315049	-0.191193	0.214993	-0.212862	0.099781	-0.349731	0.231857	0.248518	0.109554	0.218298	0.139273	-0.00614986	-0.0805833	-0.0758762	-0.121263	0.0770986	-0.267384
FNTB	-0.822726	-0.969832	-0.799695	-1.07083	NA	NA	NA	NA	NA	-1.03386	NA	NA	NA	NA	NA	NA	NA	NA	NA	-0.154064	NA	NA	NA	NA	NA	NA	-0.123607
FOCAD	0.653713	0.665256	0.814315	0.674749	1.08629	0.881245	0.710523	0.866452	0.729977	NA	-0.527521	NA	0.206751	NA	NA	0.0752648	NA	NA	NA	NA	NA	NA	NA	NA	NA	NA	-0.955314
FOXK1	-0.211057	-0.177949	-0.153135	-0.245466	-0.0680852	-0.0827784	-0.282365	-0.586904	-0.179613	-0.513822	-0.604136	-0.497945	0.178597	0.656153	0.209184	0.179987	0.424351	0.436961	0.277776	0.397409	0.107051	0.0729284	0.110015	-0.135937	0.0884423	-0.0201958	0.262
FOXK2	NA	NA	NA	NA	NA	NA	NA	NA	NA	NA	NA	NA	-0.57875	-0.300525	-0.303382	-0.549409	-0.60033	-0.745168	-0.887136	-0.687132	NA	NA	NA	NA	NA	NA	-0.989163
FOXO1	-0.450719	-1.02939	-0.341424	-0.425567	-0.423139	-0.473175	-0.76421	-0.712715	-0.94809	NA	NA	NA	-0.378881	-0.252115	-0.282997	-0.141102	0.0907542	-0.0377357	0.0587046	0.108897	-0.43781	-0.549394	-0.959712	-0.539283	-0.465501	-0.566549	-0.553695
FOXP1	-0.189571	-0.339265	-0.310284	-0.181114	-0.17822	0.0989532	-0.602551	-0.696914	-0.582883	-0.684553	-0.796655	-0.979679	NA	NA	-0.0859753	NA	0.17044	0.124228	0.235054	NA	-0.0625639	-0.00879231	-0.304807	-0.209203	0.118697	0.130936	1.21949
FOXP3	NA	NA	NA	NA	NA	NA	-0.142988	-0.602262	-0.242652	0.0427693	-0.0146231	-0.234885	-0.28219	-0.467179	-0.193432	-0.107187	NA	NA	NA	-0.726572	NA	NA	NA	NA	NA	NA	NA
FOXRED1	-0.995175	NA	-1.44053	-1.07364	-0.775206	-0.957418	NA	NA	-0.437614	-0.558656	-0.249651	-0.50826	0.0937962	0.0839235	-0.0242627	-0.0375932	-0.183962	-0.223757	-0.285382	-0.526866	NA	NA	NA	NA	NA	NA	-0.87127
FPGS	NA	NA	NA	NA	NA	NA	NA	NA	-0.620129	-0.637322	-0.634272	-0.908761	-0.211691	-0.286192	-0.204601	-0.336173	-0.507482	-0.674811	-0.945837	NA	NA	NA	NA	NA	NA	NA	-0.88582
FPGT	-0.949498	-0.936384	-1.04075	-0.597508	-0.931223	NA	NA	NA	NA	-0.967505	NA	NA	NA	-0.592226	-0.800744	NA	-0.60112	-0.241957	-0.323252	-0.0604831	NA	NA	NA	NA	NA	NA	-0.255914
FRG1	-0.135697	-0.0429133	-0.237027	-0.070576	-0.151712	-0.417788	-0.120459	-0.123905	-0.043938	-0.285907	-0.604136	-0.249255	0.300721	0.170822	0.266203	0.34642	0.20261	0.197672	0.163667	0.192061	NA	NA	NA	NA	NA	NA	-0.111753
FRYL	-0.175199	-0.0891796	-0.123598	-0.352146	-0.534272	-0.433105	-0.258903	-0.116444	-0.200176	-0.280593	-0.175653	-0.106449	NA	0.693351	NA	1.29785	NA	NA	NA	NA	NA	NA	NA	NA	NA	NA	0.0139949
FSCN1	-0.670234	-0.790684	NA	-0.0254695	-0.253144	-0.179841	0.143751	0.205968	0.229148	0.510797	0.585029	0.562293	0.462881	0.613662	0.4385	-0.401164	-0.739745	-0.664834	-1.34881	-1.1304	-0.687816	-0.133645	-0.465501	0.284886	-0.0536568	0.383029	-0.985236
FTH1	0.0345245	-0.0828788	-0.0792267	-0.287427	-0.348091	-0.372734	-0.180766	-0.57395	-0.374694	-0.00087506	0.227344	0.0710109	0.0219569	-0.379272	-0.211141	0.133963	-0.645103	-0.684997	-0.441658	-0.574629	0.161319	-0.0283434	0.227117	0.116838	0.109469	0.260932	-0.279078
FTL	-0.781987	-0.9433	-0.62442	NA	NA	-1.57058	0.32746	0.235236	0.259803	0.326393	0.267758	0.215259	-0.729491	NA	-0.812163	-0.00102289	NA	NA	-0.863707	-1.36082	-0.420752	-0.137394	-0.631549	0.0144512	-0.326231	-0.185824	-0.550025
FTO	0.00932259	-0.0210202	0.0298586	-0.269666	0.0515852	-0.111853	0.198045	0.0256258	-0.248612	-0.589604	-0.79183	-0.247179	0.340671	0.232154	0.291538	0.0604664	0.497268	0.511674	0.535853	0.559439	0.146262	0.14785	-0.220215	-0.101698	-0.149341	0.320072	0.118434
FTSJ1	NA	-0.821917	NA	NA	NA	NA	-0.185953	-0.917127	NA	-0.189604	-0.957007	-0.96402	-0.834078	-0.1697	-0.359945	-0.277541	-0.989686	-0.654806	NA	-0.459349	-1.1877	-0.638261	-0.736177	-0.542466	-0.48228	-0.996322	-0.236243
FTSJ3	-0.0146851	0.0582776	0.0148907	-0.0300122	0.0216813	-0.0486473	0.2978	0.261327	0.272193	0.328566	0.28174	0.295684	0.459216	0.585395	0.530641	0.614941	0.428646	0.41562	0.479476	0.429962	NA	NA	NA	NA	NA	NA	0.0392464
FUBP1	1.15029	1.10479	1.02342	1.07472	1.18328	1.03916	0.962038	0.896264	0.820048	0.915877	0.978594	0.948113	NA	NA	1.26535	1.29961	NA	1.32738	NA	NA	1.57061	1.30498	1.81673	1.58952	1.75449	1.62959	1.36228
FUBP3	0.154567	0.126768	0.318016	0.476648	0.213427	0.127093	-0.0147565	0.121736	0.102647	0.0695399	-0.082718	0.112804	0.695442	0.713486	0.595892	0.758962	0.565977	0.629256	0.623999	0.628413	0.172899	0.209441	0.198106	0.0191553	0.045498	0.00937347	0.371923
FUCA1	-0.442233	-0.689015	-0.338101	-0.366056	-0.434254	-0.551016	-0.504119	-0.219655	-0.307177	-0.563847	-0.66984	-0.73645	-1.05964	-0.77952	-0.668009	-0.796185	-0.277525	-0.253	-0.196463	-0.189423	NA	NA	NA	NA	NA	NA	-0.101496
FUNDC2	-0.192064	-0.181531	-0.0372954	-0.354389	-0.307313	-0.350719	-0.0612934	-0.223743	-0.339362	-0.510887	-0.608233	-0.892193	-0.242507	0.147522	0.0744761	0.256834	0.128132	0.182471	0.0311117	0.176163	-0.41767	-0.797043	-0.443267	-0.325035	-0.605905	-0.442308	-0.304277
FURIN	NA	NA	NA	NA	NA	NA	-1.00011	NA	NA	NA	NA	NA	NA	-0.663135	-0.771499	-0.500941	NA	NA	NA	NA	NA	NA	NA	NA	NA	NA	NA
FUS	1.0277	0.962266	1.02342	1.06203	0.927464	0.923682	0.997559	0.803619	0.769929	0.797272	0.803955	0.806985	0.909497	0.823003	1.04164	1.24258	0.947689	0.951234	1.04704	0.928029	0.585866	0.589747	0.462683	0.633069	0.414942	0.309554	0.566585
FXN	0.0615026	-0.113476	-0.0198402	-0.196673	-0.148645	-0.138946	-1.07352	-0.535951	-0.706682	-0.234381	-0.0607141	-0.477207	0.299011	0.0220438	-0.014798	-0.0620189	0.327373	0.163733	0.315225	0.307539	NA	NA	NA	NA	NA	NA	0.154619
FXR1	0.0015491	0.0439421	0.0584711	0.0227936	-0.080687	-0.147872	0.252034	0.268216	0.218731	0.228437	0.114267	0.399228	0.610161	0.738234	0.759513	0.730029	0.4551	0.296171	0.389423	0.389697	0.126177	0.269149	0.281085	0.170852	0.242618	0.255328	0.861611
FXR2	-0.909798	-0.929456	-0.849152	NA	NA	NA	-0.650225	-0.413726	-0.509805	NA	-0.479186	-0.210497	-0.251178	-0.0129213	0.104937	0.10095	-0.0395192	-0.158757	-0.22883	-0.147495	-0.742995	-0.347779	-0.499014	-0.784148	-1.15546	-0.982009	0.0871071
FYB1	0.891073	0.900851	0.864998	0.877612	0.921832	0.894961	0.524367	0.48873	0.696097	0.444394	0.38578	0.40224	0.619704	0.506491	0.610707	0.692517	1.29702	1.25993	1.11585	1.17926	0.224783	0.530345	0.729056	0.176035	0.608283	0.530345	1.10005
FYN	0.200458	0.133797	0.241525	0.0553975	0.271986	0.176585	-0.550962	-0.477868	-0.604229	-0.111457	-0.0710279	-0.092791	NA	NA	NA	NA	NA	NA	NA	NA	-0.835846	-0.667284	-1.2301	-0.786877	-0.96136	-0.697898	0.541439
FYTTD1	-0.631656	-0.552271	-0.597448	-0.566573	-0.513818	NA	-0.264603	-0.797246	-0.349659	-0.989771	-1.01205	NA	-0.300317	-0.891482	-0.340932	-0.146718	0.325276	0.383029	0.35746	0.362318	NA	NA	NA	NA	NA	NA	0.200707
G3BP1	0.188151	0.17847	0.132447	0.0141761	-0.059079	0.0240451	0.587688	0.583397	0.513313	0.625047	0.642745	0.663285	1.16901	1.18115	1.27231	1.46371	0.760112	0.681075	0.680408	0.654629	0.19021	-0.11257	0.0855699	0.677049	0.496834	0.615893	-0.0341693
G3BP2	0.0577835	0.143429	0.100383	0.0953365	0.244111	0.101548	0.430266	0.363756	0.384736	0.339367	0.425665	0.415578	0.410143	0.574708	0.650499	0.767611	0.35948	0.306939	0.303958	0.291435	-0.0592471	0.130936	0.0921568	0.103684	0.175758	0.177978	0.235251
G6PD	0.729111	0.688416	0.716676	0.602505	0.725342	0.692624	0.602146	0.554527	0.484421	0.667474	0.564376	0.579821	1.17173	1.18856	1.12611	0.904848	1.11218	1.11916	0.856616	1.05169	0.900789	1.00915	0.884814	0.818854	0.854925	0.827661	0.460192
GAA	-0.37918	-0.377102	-0.307086	-0.228412	-0.192368	-0.240324	-0.493157	-0.321932	-0.46357	-0.420192	-0.322697	-0.267656	0.0970993	-0.0457066	-0.0792374	-0.205403	0.0799961	0.0876226	-0.0458245	0.158638	-0.834321	-0.776153	-0.508399	-0.781049	-0.847265	-0.511062	0.0798192
GABARAP	-0.767012	-0.543365	-0.534358	-0.305532	-0.408722	-0.409649	-0.495365	-0.688051	-0.779364	-0.592085	NA	NA	-0.666505	-0.425548	-0.444537	NA	NA	NA	NA	NA	NA	NA	NA	NA	NA	NA	NA
GABARAPL1	-0.364322	0.185815	0.152672	-0.035595	-0.0680852	NA	-0.104466	0.0299268	-0.0465982	-0.0405035	0.0715014	NA	-0.264149	-0.313415	-0.593978	-0.284927	-0.165006	-0.258451	-0.0731204	-1.05916	NA	NA	NA	NA	NA	NA	NA
GABARAPL2	NA	NA	NA	NA	NA	NA	-0.32821	-0.599914	-0.511769	-0.554784	-0.627294	-0.538626	0.280328	0.126338	0.215837	-0.499186	-1.0013	-0.571027	-0.679535	-0.682754	NA	NA	NA	NA	NA	NA	-1.06889
GABPA	0.217662	0.146918	0.186814	0.0447811	-0.033349	0.0172742	-0.125853	0.332825	0.231175	0.0549884	-0.269794	-0.256479	0.142386	0.201774	0.154406	0.360488	0.419007	0.299466	0.294833	0.417569	0.269149	0.198106	0.18618	0.0443213	0.193795	0.296384	0.586121
GABPB2	NA	-0.188762	-1.26735	-1.03389	-0.785965	-1.04608	NA	NA	NA	NA	NA	NA	-0.861484	-0.584687	-0.941819	-0.73467	-0.577277	-0.523731	-0.711941	-0.559789	NA	NA	NA	NA	NA	NA	NA
GADD45GIP1	-0.385601	-0.339265	-0.527616	-0.851395	-0.736549	-1.19184	-0.693711	-1.24713	-0.622226	-0.568746	NA	-0.874482	-0.13301	-0.0149095	-0.0139295	-0.0677181	-0.141774	0.00301617	0.0398672	-0.132283	-0.863217	0.0493884	0.0374651	-0.427321	-0.337833	-0.568454	-0.0278576
GAK	0.0358475	0.105221	0.0318428	0.0848123	-0.085519	-0.151116	-0.0706894	-0.00435997	0.0446633	-0.220583	-0.155023	-0.135645	0.478957	0.532265	0.561309	0.437382	0.500191	0.444287	0.366459	0.393968	0.0952497	0.206461	0.124905	-0.00614986	0.0831434	0.160625	0.684198
GALE	-0.859381	NA	-0.553248	-0.732748	-0.842916	NA	-0.479984	0.0495193	-0.267423	-0.0367852	-0.438078	-0.112719	0.064186	-0.04621	-0.124491	-0.327083	-0.0994866	-0.881325	-0.154186	-0.834039	NA	NA	NA	NA	NA	NA	-0.933538
GALK1	0.23988	0.156236	0.122257	0.220387	0.249631	0.114899	-0.201786	0.105725	-0.292923	0.0025958	-0.125856	-0.316433	0.493875	0.505403	0.433379	0.23843	0.242484	0.239254	0.0780344	0.346823	0.364929	0.129084	0.209982	0.211335	0.241464	0.0740968	0.653521
GALK2	-0.349671	-0.125934	-1.12299	-0.503568	-0.460951	-0.638568	-0.053234	-0.139135	-0.134113	-0.342263	-0.202196	-0.572976	-0.0703791	-0.21608	-0.0676898	-0.296965	-0.152084	-0.275745	-0.258787	-0.161917	-0.0428533	-0.226244	0.0283728	-0.410127	-0.254112	-0.311743	-0.250696
GALM	0.355413	0.412746	0.369268	0.330682	0.389773	0.375238	0.402261	0.531386	0.438767	0.241461	0.205037	0.349291	0.597142	0.61913	0.592094	0.296129	0.135168	0.257041	0.0694985	0.26	0.484898	-0.0861734	0.356639	0.258263	0.437298	0.20369	0.22392
GALNT2	NA	-1.08859	NA	NA	NA	-1.14582	-0.201786	-0.786312	-0.226699	-1.07186	-1.07088	-0.95059	0.0845008	0.329765	0.324735	0.166194	-0.257034	-0.209019	-0.165064	-0.423845	-0.649666	-0.701901	-0.696816	-0.819471	-0.891885	-0.779714	-0.62422
GALT	0.100699	0.17847	0.176513	0.0149419	0.10959	0.0704819	0.0039685	-0.512799	-0.257189	-0.753049	-0.404737	-1.00235	-0.134779	-0.183746	-0.249032	-0.160416	0.312661	0.424741	0.0278113	0.348456	0.106509	0.0960653	0.0740968	-0.171516	-0.468415	-0.0521183	-0.24909
GAMT	-0.457886	-0.477334	-0.632589	-0.248362	-1.09902	-0.961122	NA	NA	NA	NA	NA	NA	-0.21109	-0.246319	-0.212353	-0.482539	-0.314304	-0.208726	-0.692735	-0.17579	NA	NA	NA	NA	NA	NA	0.255612
GANAB	1.2143	1.28615	1.24872	1.25196	1.31238	1.41225	1.20973	1.00094	1.10527	1.04319	1.09261	0.987311	1.71207	NA	1.79006	1.45325	1.34392	1.49052	1.38409	1.47997	0.630547	0.629907	0.559816	0.68775	0.563612	0.598199	1.30888
GAPDH	4.66426	6.27863	4.63198	6.22248	4.95757	6.4018	7.32138	4.23606	8.75942	8.42524	10.0698	10.1553	16.8137	19.6576	19.6576	16.8299	7.97977	8.00334	6.62289	7.24322	3.09303	3.17507	3.47994	3.17507	3.47994	2.73438	3.16948
GAPVD1	0.104242	0.0603209	-0.0899676	-0.38854	-0.25836	-0.368808	0.161138	0.00633906	0.041823	0.0859833	-0.0934087	0.0775328	0.401433	0.555803	0.460097	0.263905	0.296204	0.194241	0.112666	0.299502	-0.477387	-0.292363	-0.406575	-0.735	-0.666965	-0.525552	0.0752763
GAR1	0.452552	0.433532	0.408099	0.176105	0.355143	0.290709	0.370678	0.318026	0.30691	0.223597	0.188432	0.168575	0.570336	0.559068	0.607138	0.772579	0.752552	0.883554	0.797154	0.771161	NA	NA	NA	NA	NA	NA	0.178434
GARS	0.324703	0.471397	0.408099	0.46226	0.421529	0.358609	0.860709	0.873069	0.835229	0.755414	0.686483	0.730806	NA	NA	NA	NA	NA	NA	NA	NA	NA	NA	NA	NA	NA	NA	NA
GART	0.384813	0.451795	0.386262	0.506252	0.446125	0.431063	0.926157	0.756677	0.939738	1.02865	1.101	1.0851	1.52092	1.5321	1.39521	1.19799	0.808324	0.880983	0.462052	0.696674	0.623365	0.81605	0.745362	0.771853	0.923015	0.902378	0.758685
GATAD2A	-0.0386783	-0.0629118	-0.0811902	-0.15982	0.0496209	-0.0216714	-0.0010632	0.0206845	0.15157	-0.0172266	0.150381	0.129159	0.60778	0.568599	0.756228	0.701356	0.985241	0.603616	1.10777	0.859182	NA	NA	NA	NA	NA	NA	0.397907
GATAD2B	0.140852	-0.0606378	0.125173	-0.0797551	0.0600793	-0.0247415	-0.0646987	-0.0484042	-0.101195	-0.198318	-0.119697	-0.262536	0.420654	0.535716	0.556964	0.480513	0.385669	0.463095	0.482878	0.424255	NA	NA	NA	NA	NA	NA	-0.25031
GATC	NA	NA	NA	NA	NA	NA	-0.578539	-0.805401	-0.987132	-0.987515	-1.01473	-0.982849	-0.083597	-0.567245	-0.361936	0.0936673	-0.903771	-0.773147	-0.161301	-0.482122	NA	NA	NA	NA	NA	NA	NA
GATD1	0.100699	0.0603209	0.0692235	-0.201499	-0.0262659	-0.0735155	0.0672651	-0.509787	-0.167705	-0.763566	-0.0015422	0.0355157	0.11404	-0.141253	-0.021233	-0.292515	0.0469859	0.103789	0.0623063	0.0385342	-0.37457	-0.739797	-0.476109	-0.438546	-0.454304	-0.458322	0.634772
GATD3B	NA	NA	NA	NA	NA	-0.406491	NA	NA	NA	NA	NA	NA	NA	NA	NA	NA	NA	NA	NA	NA	NA	NA	NA	NA	NA	NA	NA
GBE1	0.184664	0.114485	0.110134	0.311543	0.149727	0.0933162	0.1421	0.105725	-0.0999134	-0.0471511	-0.127608	-0.241569	0.108792	0.276286	0.416904	0.167291	0.35873	0.340712	0.0115824	0.306744	-0.272755	-0.979686	-0.414078	-0.473889	-0.556625	-0.352065	0.348614
GBF1	0.0398421	-0.0210202	-0.213855	-0.451959	-0.264782	-0.202796	-0.357132	-0.265478	-0.636112	0.179032	-0.151004	0.0895285	0.454381	0.48866	0.484939	0.458152	0.500534	0.473117	0.349618	0.437014	NA	NA	NA	NA	NA	NA	-0.406178
GBP1	0.874406	0.958187	0.993375	0.811212	0.765485	0.787368	1.36843	1.32443	1.40008	1.28527	1.21284	1.16447	0.820428	0.978819	0.908878	1.16943	1.22566	1.06218	0.992531	1.04198	0.762521	0.918046	0.785212	1.04039	0.94895	1.07893	0.493658
GBP2	0.450482	0.497164	0.471398	0.53299	0.425041	0.314362	0.783049	0.926174	1.02312	0.757838	0.718368	0.813093	0.760565	0.865554	0.935784	0.961373	0.86876	0.861639	0.859804	0.870705	0.312029	-0.0712459	-0.500011	1.0179	0.629193	0.860243	0.215352
GBP4	0.0398421	-0.00894756	0.00507863	-0.0955622	-0.107885	-0.147872	0.477047	0.472458	0.542884	0.376922	0.240997	0.322042	0.315107	0.24981	0.385731	0.410942	0.268559	0.218244	-0.0207786	0.13646	0.102665	0.339032	0.17897	0.720087	0.613576	0.65085	0.0509851
GBP5	-0.1077	-0.242194	-0.118481	-0.602071	-0.3103	-1.22587	1.01893	0.878983	1.14718	0.881313	0.875522	0.941559	0.521964	0.629839	0.735816	0.917594	0.440273	0.501916	0.47495	0.372224	-0.0216649	-0.444309	-0.389516	1.28645	0.663803	0.824883	-0.335311
GCA	-0.0855957	-0.0703714	-0.114971	-0.300361	-0.203101	-0.259658	-0.357132	-0.643412	-0.334024	-0.0705972	-0.028828	-0.0700657	0.156669	0.215535	0.106146	-0.10927	-0.032672	0.0525296	-0.113082	0.176316	-0.433165	-0.947084	-1.00262	-0.333965	-0.713718	-0.479481	0.282177
GCC2	-1.05687	-0.949888	-1.13602	-0.528924	NA	NA	NA	-0.745624	-0.76654	-0.925494	NA	-0.7018	1.0387	0.911896	0.878922	0.877867	0.229365	0.25639	0.276591	0.613608	0.14785	0.0542535	0.205091	-0.112327	0.0234898	-0.0762724	-0.0185811
GCDH	0.0970382	0.26794	0.22704	0.314271	0.30965	0.348896	0.478843	0.409916	0.450977	0.131954	0.243485	0.132054	0.443759	-0.0103807	0.381243	0.269885	0.46838	0.515671	0.576395	0.53006	0.466614	0.300429	-0.122321	0.215229	0.00436628	0.129084	0.26857
GCHFR	0.124013	-0.0348089	-0.0233389	0.0194863	0.114663	0.101548	-0.253123	-0.177868	-0.090015	NA	-0.13022	-0.12743	0.374578	0.29359	0.316381	-0.19698	-0.192737	0.0668197	-0.310343	-0.122945	NA	NA	NA	NA	NA	NA	-0.367751
GCK	-0.0175707	-0.0647842	-0.0325469	-0.0813043	-0.382501	-0.379083	-0.508359	-0.724661	-0.549764	NA	NA	NA	NA	NA	NA	NA	NA	NA	NA	NA	NA	NA	NA	NA	NA	NA	NA
GCLC	-0.0357402	0.101701	0.0427725	0.0355136	-0.0139997	-0.0827784	-0.346674	-0.126066	-0.0543709	-0.448156	-0.640904	-0.454888	-0.342704	-0.227009	-0.331689	-0.354333	0.0698462	0.183834	-0.160615	0.0936767	0.0637696	-0.233294	0.0553725	0.074581	0.023806	0.0305372	0.287326
GCLM	-0.184824	-0.0606378	-0.0492876	-0.0826918	-0.251299	-0.391385	0.139902	0.054197	0.0801845	-0.202102	-0.288715	-0.102763	-0.142492	-0.0440303	0.0774004	0.438755	0.4532	0.371689	0.499454	0.283569	0.114749	0.0937051	-0.0131065	0.0729284	0.180273	0.157954	-0.525958
GCN1	0.58683	0.641742	0.618132	0.422478	0.437134	0.317674	0.822616	0.777283	0.780555	0.978586	0.949208	0.865282	1.37587	1.71616	1.65112	1.36346	1.50538	1.4841	1.16519	1.35904	-0.624131	-0.17583	0.0825074	-0.131959	-0.489951	-0.378952	0.312085
GCSH	NA	-0.858774	-0.95209	NA	-0.966065	-1.00245	-0.845684	NA	-0.912184	-0.742279	-0.590601	-0.550983	-0.590805	-0.709556	-0.699131	-0.664837	-0.45298	-0.534173	-0.538806	-0.48272	NA	NA	NA	NA	NA	NA	0.128603
GDI1	0.720928	0.764132	0.758279	0.767303	0.82689	0.807923	0.717051	0.714522	0.79118	0.482713	0.469789	0.526349	0.590448	0.621803	0.590825	0.519854	0.763029	0.863924	0.739516	0.826475	1.27991	0.841692	1.15589	0.989121	0.904076	1.0179	0.812125
GDI2	1.56371	1.62718	1.64083	1.6765	1.68155	1.66282	2.14618	1.6284	1.83789	1.51596	1.50992	1.51804	2.02372	2.19536	2.04692	2.11126	2.04641	2.04903	1.67996	2.10394	1.6878	1.4447	1.48334	1.62959	1.6728	1.61351	0.875469
GDPGP1	-0.758649	-0.788687	NA	NA	NA	-0.959218	NA	NA	NA	NA	-0.748532	NA	-0.152596	-0.122376	-0.161121	NA	0.489225	0.375982	0.590868	0.494825	NA	NA	NA	NA	NA	NA	-0.663898
GEMIN4	NA	NA	-1.15581	NA	NA	-0.925666	-0.582884	-0.54722	-0.759121	-0.456924	-0.395218	-0.578877	0.299366	0.334176	0.357854	0.230817	-0.0986099	-0.0618507	-0.13948	-0.0900631	NA	NA	NA	NA	NA	NA	0.210378
GEMIN5	-0.0357402	0.00548717	0.0217523	-0.209974	-0.148645	-0.301623	0.110776	0.158352	0.143801	0.126755	0.0149739	0.0324097	0.601998	0.676112	0.662873	0.680043	0.458398	0.503208	0.719502	0.508835	-0.385289	-0.43781	-0.627161	-0.0887987	-0.183695	-0.142784	-0.714367
GEMIN6	NA	NA	-0.601794	NA	NA	NA	-0.671082	NA	-0.686771	NA	-0.853896	NA	0.0952305	-0.339171	-0.135883	-0.285775	-0.650798	-0.665135	-0.674264	-0.567305	NA	NA	NA	NA	NA	NA	NA
GEMIN7	NA	NA	NA	-1.30267	NA	NA	NA	NA	NA	-0.997272	-0.923854	-0.883526	-0.799765	NA	NA	NA	NA	NA	NA	NA	NA	NA	NA	NA	NA	NA	-0.221627
GET4	-0.3227	-0.267562	-0.295272	-0.126981	-0.442953	-0.352786	-0.535189	-0.591159	-0.144114	-0.500962	-0.813693	-0.708044	-0.0583473	-0.12506	-0.303215	-0.236682	-0.103966	-0.0355546	-0.439458	-0.106709	-0.43134	-0.221525	-0.515714	-0.830841	-1.00381	-0.663447	0.244416
GFAP	-0.998178	NA	NA	-0.905222	-0.218808	-0.709089	-0.425621	-0.741936	NA	-0.389409	-0.774189	-1.34554	NA	NA	NA	NA	NA	NA	NA	NA	NA	NA	NA	NA	NA	NA	0.350575
GFER	-1.18178	-0.734742	NA	-0.91953	-0.742984	-0.657522	-1.13899	-1.21129	-0.720162	-0.757984	-0.98629	-0.993048	-0.492381	-0.277331	-0.403668	-0.590752	-0.24962	-0.378933	-0.23804	-0.374863	0.00113886	-0.0255407	-0.0331975	-0.350748	-0.240027	-0.289851	-0.479851
GFM1	0.00932259	-0.145283	-0.0352458	-0.0329793	-0.01634	-0.253642	0.322334	0.212867	0.312534	0.107303	0.143343	0.137021	0.711347	NA	0.768117	0.597518	0.543885	0.448585	0.543026	0.400586	0.363189	0.268311	0.166077	0.455249	0.404195	0.471337	0.0951043
GFM2	-0.642244	-0.667255	-0.569687	-0.766958	NA	NA	NA	NA	NA	-0.84145	NA	NA	-0.248713	-0.192976	-0.122079	-0.349409	-0.101375	0.0270676	-0.0356474	0.0773662	NA	NA	NA	NA	NA	NA	0.261371
GFPT1	0.213319	0.250056	0.219598	0.123149	0.172388	0.0558462	0.516137	0.55796	0.361757	0.43286	0.45701	0.405401	0.783292	0.941149	0.907269	0.643156	0.451352	0.595777	0.466746	0.494458	0.531923	0.593678	0.211964	0.563811	0.698393	0.664781	0.678872
GGA1	-0.800697	-0.764735	-0.879708	-0.953929	-0.68593	-0.73488	-0.180766	-0.700396	-0.46357	NA	0.00867094	0.0298605	-0.455732	-0.446181	-0.231339	-0.0586757	0.00925493	-0.117966	-0.100963	-0.0881794	-0.0298464	-0.207066	0.074581	-0.0394237	0.101127	-0.201313	1.33135
GGA2	NA	-0.914527	-0.757916	-0.585161	-0.648689	-0.856542	NA	-1.12722	NA	NA	-0.971167	-0.784813	-0.0124196	-0.286008	-0.0283162	-0.18888	-0.450028	-0.174688	0.286522	-0.248358	-0.518282	-0.653293	-0.57849	-0.891885	-0.806087	-0.76424	-0.752538
GGA3	-1.13056	-1.01816	NA	-0.866358	-1.02351	-0.968531	NA	NA	NA	NA	NA	NA	0.0413529	0.203915	-0.24161	0.0141756	-0.0677831	-0.0763685	-0.298163	-0.274479	-0.215973	-0.0901811	-0.652522	-0.382447	-0.483229	-0.397301	0.824521
GGACT	-0.79008	-0.658925	-0.6496	-0.117596	-0.278002	-0.551016	-0.789073	NA	-0.452219	NA	NA	NA	-0.861847	-0.883833	-1.32719	NA	-0.533358	-0.382263	-0.855368	-0.341801	0.0236992	-0.527189	-0.791606	-0.114774	-0.688241	-0.829032	NA
GGCT	-0.488238	-0.280936	-0.410471	-0.173637	-0.0506917	-0.338675	-0.374387	-0.305898	-0.4922	-0.160209	-0.606119	-0.493073	0.361454	0.23737	0.255926	0.0878502	0.0753807	-0.174253	-0.0853271	0.126943	0.19706	0.120422	0.301695	-0.676625	-0.38822	-0.00879231	0.237949
GGH	-1.0218	-0.978289	-1.02982	-0.657159	NA	NA	NA	NA	NA	NA	NA	NA	0.0595181	-0.0806832	-0.0159305	-0.507555	-0.515153	-0.485819	-0.607374	-0.601269	-0.663962	-0.440671	-1.34302	-0.650782	-0.51489	-0.743857	-0.470368
GGPS1	-0.497243	-0.394301	-0.25759	-0.645979	-0.767813	-0.58935	NA	NA	NA	-1.0768	NA	NA	-0.262661	-0.218818	-0.471245	-0.323389	-0.0507903	-0.0388038	-0.110866	-0.0586027	-0.191273	0.0419899	-0.110781	-0.463586	-0.384424	-0.360568	-0.420747
GHITM	-0.204056	-0.374449	-0.204438	-0.201499	-0.0759534	-0.0511321	-0.234293	-0.153941	-0.182173	-0.160209	-0.237181	-0.234885	-0.462689	-0.249434	-0.106995	0.29705	-0.377992	-0.0184852	0.0471566	-0.0538407	-0.441537	-0.525982	-0.275473	-0.342129	-0.594759	-0.52758	-0.111149
GID8	-0.927195	NA	-0.775801	-1.12237	-1.04403	NA	NA	NA	NA	NA	NA	NA	0.0696724	-0.1041	-0.0746353	-0.369225	-0.0522358	-0.0846145	-0.205532	-0.034807	-0.784682	-0.495912	-0.769301	-0.496437	-0.68062	-0.575722	1.43666
GIGYF1	-0.647167	-0.641623	-1.29355	-0.890706	-0.772782	-0.925666	-0.733206	-0.56929	-0.909445	-0.887249	-0.960489	-0.763268	-1.01215	NA	-0.838458	-0.57023	-0.344912	-0.16919	-0.134783	-0.179041	-0.369439	-0.270879	-0.641344	-0.823849	-0.819471	-0.562969	-0.679367
GIGYF2	-0.406426	-0.377102	-0.28716	-0.331264	-0.256594	-0.756241	-0.316221	-0.28492	-0.35703	0.0775131	-0.0015422	-0.0401721	0.259975	0.218704	0.38602	0.361253	0.0318002	0.104468	0.0288741	0.0491592	-0.310594	0.21994	0.141226	-0.590259	-0.256958	-0.147327	0.0618079
GIMAP1	1.15029	1.14283	1.18416	1.05667	1.18789	1.13817	0.926157	0.926174	0.948013	0.862669	0.868778	0.816957	0.302265	0.129264	0.425331	0.38586	1.21319	1.23149	1.09577	1.17213	0.780559	0.855818	0.690565	0.618692	0.766716	0.651417	0.993491
GIMAP2	-0.493185	-0.422743	-0.703898	-0.643291	-0.442953	-0.202796	-1.02815	-0.418881	-0.821839	NA	-0.709607	NA	-0.884312	NA	NA	-0.700366	0.0725192	-0.021839	0.160219	0.129385	NA	NA	NA	NA	NA	NA	0.145292
GIMAP4	1.70793	1.62126	1.62963	1.75414	1.52695	1.3461	1.47298	1.31076	1.47696	1.10682	1.0612	1.06785	0.0832558	0.430626	0.54108	0.761036	1.60427	1.51811	1.66421	1.81495	0.821574	0.798895	0.73597	0.729497	0.700036	0.8444	1.0649
GIMAP5	0.121716	0.0669084	0.0933519	0.179066	0.227269	0.11719	0.419784	0.464814	0.369709	0.126755	0.168393	0.12592	0.387694	0.537757	0.618118	0.843495	1.02508	0.964056	1.14945	0.947283	0.0587853	-0.185824	0.209441	-0.0907264	-0.188096	-0.118316	NA
GIMAP7	0.46269	0.425918	0.427325	0.459874	0.330481	0.259558	0.635158	0.759443	0.669647	0.391125	0.283524	0.352401	-0.593571	-0.111151	-0.113311	0.305818	0.627363	0.620855	0.574441	0.586344	0.240248	0.551203	-0.653872	0.574702	0.272895	0.608283	0.553215
GIMAP8	0.28187	0.296071	0.386262	0.328156	0.182352	0.251103	0.143751	0.217722	0.281814	0.0557139	-0.0956535	-0.0629995	-0.0517248	0.00594364	0.134368	0.269219	0.625925	0.543022	0.600559	0.576236	0.722627	0.51327	0.226647	-0.0483956	0.22271	0.284886	0.0602172
GINS4	NA	NA	NA	NA	NA	NA	-0.611292	-0.632815	-0.668273	-0.637322	-0.606119	-0.734171	0.238127	0.0886298	0.11465	-0.293593	NA	NA	NA	NA	NA	NA	NA	NA	NA	NA	NA
GIPC1	-1.05687	-0.6636	-1.02266	NA	NA	NA	-0.237089	-0.130209	-0.0580499	-1.02527	NA	NA	-0.231833	-0.333141	-0.140743	-0.421016	-0.544436	-0.845698	-0.376069	-0.277031	-0.390452	-0.308783	-0.268453	-0.521428	-0.439776	-0.782017	NA
GIT1	0.182313	0.133797	0.0318428	0.0141761	0.162146	0.112878	0.169324	-0.0558212	-0.000949028	-0.350224	-0.255613	-0.353882	0.46444	0.519147	0.549249	0.452375	0.523536	0.567975	0.43031	0.458236	0.505541	0.637302	0.525456	0.440607	0.360937	0.360937	-0.379884
GIT2	0.332259	0.383249	0.318016	0.362738	0.26354	0.173379	0.11369	0.0354067	0.182026	-0.0106516	-0.00343949	0.0257136	NA	NA	NA	NA	0.407064	0.388098	0.330344	0.475951	0.577763	0.636276	0.582587	0.305761	0.433796	0.359697	0.512247
GK3P	NA	-1.16824	NA	NA	NA	NA	-0.734753	-0.921172	-1.06403	-0.987515	NA	NA	NA	NA	NA	NA	NA	NA	NA	NA	NA	NA	NA	NA	NA	NA	NA
GLB1	-0.230433	-0.350745	-0.292713	-0.361199	-0.233511	-0.374513	-0.0802351	-0.287438	-0.308703	-0.837961	NA	NA	0.0199541	0.139279	0.150643	0.245824	0.1263	0.0606607	0.43095	0.403801	-0.42556	-0.635537	-1.14517	-0.488418	-0.69501	-0.546977	0.477325
GLE1	NA	NA	-1.14636	-1.29702	-0.604378	NA	-0.433044	NA	-0.434587	NA	NA	NA	-0.111015	-0.115594	-0.0788238	0.0523689	-0.094755	-0.183084	-0.120681	-0.364344	NA	NA	NA	NA	NA	NA	-0.520592
GLG1	0.253492	0.263565	0.28375	0.369248	0.39479	0.264264	0.252034	0.415002	0.452722	-0.0075755	-0.0257126	0.042717	0.489488	0.538358	0.671546	0.818338	0.822837	0.777902	0.844203	0.744288	0.56685	0.607516	0.680062	0.286973	0.240248	0.298936	0.133607
GLIPR2	0.215378	0.211672	0.264065	0.232782	0.332795	0.28328	0.0455377	-0.0401539	-0.132029	-0.226389	-0.590601	-0.0285269	-0.0285142	-0.0560995	0.0380594	0.240867	0.362591	0.294308	0.257638	0.158162	-0.639575	-0.110337	-0.194885	-0.316091	-0.879251	-0.609639	-0.216179
GLMN	NA	NA	NA	-0.855931	-1.17252	NA	-1.01701	-0.912978	-0.740089	-0.356717	-0.550294	-0.473615	0.125369	0.280092	0.283716	-0.160802	-0.404091	-0.372166	-0.434825	-0.328554	NA	NA	NA	NA	NA	NA	0.0751686
GLO1	0.795714	0.83614	0.860131	0.678416	0.716614	0.762822	0.635158	0.607567	0.599725	0.590439	0.79173	0.657397	1.06682	1.00922	0.973653	0.813135	0.803233	0.799909	0.784733	0.835235	0.749599	0.490707	0.445071	0.568384	0.516434	0.583516	1.91108
GLOD4	1.17159	1.1313	1.0927	1.09858	1.06833	1.02615	1.12777	1.05032	1.08184	0.998776	1.06794	1.02158	0.696292	0.50615	0.513326	0.612015	1.13497	1.20502	0.927043	1.09459	1.49385	1.48334	1.44006	1.12834	1.13352	1.25564	0.454625
GLRX	0.679152	0.738586	0.685908	0.0171285	0.355143	0.372266	0.0833628	-0.0527193	0.221007	0.707737	0.429374	0.353743	0.74374	0.624491	0.634226	0.43054	0.783275	0.846448	0.678261	0.799188	0.0825074	-1.26385	-0.416867	-0.155487	-0.367343	-0.0770488	1.142
GLRX3	0.113141	0.0381225	0.168359	-0.171316	0.0852211	0.0435935	0.397566	0.318026	0.532072	0.418828	0.511203	0.356629	1.07788	0.906202	1.01805	0.928103	0.449634	0.461477	0.412256	0.372636	0.536701	0.221351	0.586533	0.659659	0.616765	0.577763	0.446254
GLRX5	-0.730312	-0.36762	-0.593365	-0.627589	-0.894499	-0.465655	-0.422917	-0.790832	-0.663483	-0.489508	-0.537051	-0.602248	0.575568	0.414796	0.529842	0.168577	-0.0389906	0.304263	0.0802685	0.417132	-0.157287	-1.12228	-0.391665	-0.456123	-0.318023	-0.285011	0.409687
GLS	0.580131	0.451795	0.568816	0.507985	0.553683	0.518192	0.802979	0.920428	0.835229	0.783106	0.696812	0.713934	1.00297	0.982207	0.955108	0.943144	0.933261	0.949445	1.02638	0.984041	0.725035	0.674796	0.571205	1.08839	1.04279	1.05977	0.616216
GLTP	-0.0288678	-0.0606378	-0.107565	-0.870104	-1.00877	NA	-0.723607	-0.708685	-0.88815	-0.0233935	-0.157599	0.0952738	-0.0735958	0.129046	0.0637354	-0.165941	-0.0186423	0.00255335	-0.0061325	-0.0367936	-1.13568	-0.501831	-0.418632	-0.657758	-1.10538	-0.692141	-0.115847
GLUD1	1.48209	1.5147	1.49879	1.61659	1.36241	1.32334	1.29187	1.47614	1.42597	1.03839	0.901548	1.05467	1.27621	1.12993	1.20151	1.37483	1.76594	1.91518	1.73218	1.72881	1.86492	1.66491	1.6391	1.56423	1.47751	1.6878	0.590415
GLYR1	0.498202	0.523169	0.461147	0.4902	0.429781	0.419358	0.304041	0.405802	0.515937	0.139293	0.0234192	0.190166	NA	NA	0.417358	NA	1.02854	1.14009	1.06278	1.03244	-0.638512	-0.454771	-1.20857	-0.527189	-0.644074	-0.610154	-0.117006
GM2A	-1.02699	-1.08397	NA	NA	NA	NA	-0.685107	NA	-1.14854	NA	NA	NA	-0.621344	-0.669322	-0.292419	-0.45094	-0.563632	-0.704421	-0.263534	-0.258997	-0.808198	-0.44663	-0.815519	-0.743334	-0.503554	-0.696816	-0.32728
GMDS	-0.0807662	-0.003049	0.0404723	0.106939	-0.0356299	-0.0987116	-0.44909	-0.244641	-0.246828	-0.532612	-0.959332	-1.10543	0.269843	0.356953	0.328184	0.0592152	0.101291	0.175143	0.0145152	0.163171	0.252012	0.280666	0.30858	0.157954	0.17897	-0.00309904	-0.130156
GMEB1	-0.256797	-0.490982	-0.669796	-0.84541	-0.599058	-0.461951	-0.983712	-0.647289	-0.821839	-1.03157	NA	NA	NA	NA	NA	NA	0.0712451	NA	NA	NA	-0.352525	-0.135434	0.537721	-0.527886	-0.111082	-0.55393	0.479279
GMEB2	-0.973268	-0.622803	-0.810209	-0.883003	-0.838285	-0.686148	NA	NA	NA	NA	NA	NA	-0.334598	-0.335806	-0.32039	-0.552503	0.0738837	-0.0139878	-0.229082	-0.196092	-0.399765	-0.446261	-0.473184	-0.583062	-0.462354	-0.564419	-0.47478
GMFB	-0.141148	-0.427233	-0.299924	-0.287427	-0.354907	-0.433105	-0.308713	0.0325556	0.0238569	-0.364275	-0.398556	-0.400435	-0.0178119	-0.365383	-0.162327	-0.338202	-0.265382	-0.366126	-0.399314	-0.47266	-0.260826	-0.614341	-1.31878	-0.0914961	-0.351641	-0.00343625	0.667259
GMFG	0.899078	0.874047	0.84627	0.82844	1.0317	0.929999	0.766976	0.724621	0.799782	0.742206	0.705169	0.815069	0.770877	0.671837	0.597336	0.757259	1.03704	0.939146	1.06802	1.03124	1.14628	1.13831	0.625249	1.01091	0.892957	0.963108	1.68246
GMIP	0.167905	0.261742	0.324745	0.419683	0.162146	0.215598	0.350906	0.386858	0.35031	0.292463	0.198047	0.206678	0.519911	0.497115	0.0160671	0.42679	0.528517	0.387052	0.131925	0.508835	0.400628	0.464103	0.530345	0.207519	0.329001	0.225557	0.292754
GMPPA	-0.274822	-0.183633	-0.331741	-0.292722	-0.184538	-0.275635	-0.0387753	-0.295411	-0.120931	0.196966	0.329019	0.272123	0.509206	0.473416	0.399375	0.129358	-0.0576508	-0.00122609	-0.288959	-0.0749827	0.0382588	-0.373805	-0.415101	-0.0920661	-0.0398631	-0.0145257	-0.165139
GMPPB	0.248568	0.271767	0.258291	0.283612	0.266721	0.253413	0.19592	0.294446	0.22367	0.111541	0.205037	0.14864	0.647495	0.661763	0.573221	0.377432	0.196843	0.193498	0.106788	0.221432	0.223969	0.421752	0.177254	0.143887	0.281489	0.0386082	0.0692345
GMPR2	0.312008	0.293286	0.249908	0.39165	0.296392	0.259558	-0.0184513	-0.0828571	0.0128918	-0.394416	-0.474705	-0.56747	0.194138	0.0682639	0.0874268	0.183201	0.399064	0.165115	0.171037	0.115782	0.304388	0.563025	0.468856	0.0878151	0.214175	0.119583	1.07824
GMPS	0.409874	0.404684	0.394262	0.341068	0.410103	0.466557	0.710523	0.521114	0.706798	0.615275	0.639141	0.55614	1.13753	1.12356	1.23075	0.949723	0.725938	0.722962	0.702226	0.760449	0.670165	0.866975	0.80225	0.669564	0.76092	0.776999	0.0240456
GNA13	0.140852	0.151898	0.0523943	0.117388	0.0297733	0.15219	0.266017	0.150251	0.286623	-0.109703	-0.180215	0.0627386	0.202512	0.284267	0.347542	0.474501	0.638247	0.570923	0.700508	0.702811	0.424782	0.431154	0.491452	0.260932	0.410331	0.354086	0.316965
GNAI2	1.79573	1.83645	1.79372	1.96256	1.73833	1.695	1.6562	1.57569	1.54365	1.24577	1.29887	1.26107	NA	NA	NA	NA	2.03119	2.03402	2.29654	2.28083	1.34476	1.50486	1.04855	1.4183	1.31561	1.28645	1.23568
GNAI3	0.460151	0.350659	0.353511	0.554719	0.507165	0.510724	0.28745	0.296315	0.202288	0.053317	0.128907	0.0978119	0.261073	0.430298	0.483219	0.736212	0.571672	0.690199	0.735425	0.699082	-0.237263	0.0341089	-0.0837564	0.236249	0.174144	0.0884423	0.873999
GNAQ	-0.886027	-0.536766	-0.855378	-0.588291	-0.745588	-0.724103	NA	NA	NA	-0.827292	-0.564038	-0.570557	-0.124341	-0.121548	-0.0963127	-0.290653	0.015513	0.137226	0.125327	0.0953195	-0.28944	-0.0553244	-0.209582	-0.318627	-0.339144	-0.188096	-0.608905
GNAS	0.126321	0.168335	0.168359	0.280365	0.169001	0.0558462	0.338912	-0.170417	0.118584	-0.300374	-0.377023	-0.450619	NA	NA	0.795988	NA	NA	NA	NA	NA	0.0300555	0.0971123	-0.266876	0.000871394	-0.00147681	-0.0599658	0.295879
GNB1	1.14061	1.13733	1.10904	1.15835	1.15487	1.13033	1.04681	1.18147	1.212	0.862669	0.883067	0.889754	NA	NA	NA	NA	NA	NA	NA	NA	0.990692	1.01973	0.787738	0.904076	0.782723	0.853433	0.807958
GNB1L	-0.697	-0.625629	-1.08457	-0.84541	NA	NA	-0.875355	-1.12251	-0.755234	NA	NA	NA	-0.429037	-0.229404	-0.226454	-0.470942	-0.525975	-0.653404	-0.669352	-0.353564	-0.153539	-0.517579	-0.883324	-0.56493	-0.577541	-0.514091	-0.535788
GNB2	0.527228	0.656701	0.60769	0.75704	0.602612	0.640851	0.640856	0.847832	0.767376	0.619074	0.580134	0.611523	NA	NA	NA	NA	NA	NA	NA	NA	0.551203	0.695935	0.4955	0.576127	0.440607	0.422058	0.880458
GNE	-0.709248	-0.712015	-0.355892	-0.98302	-0.939547	-0.878749	-0.485356	-0.439846	-0.663483	-0.40431	-0.308464	-0.489282	0.00593416	0.0553214	0.0951995	-0.0688182	-0.0998852	-0.118258	-0.252827	-0.103871	-0.229158	-0.28625	-0.377487	-0.123239	-0.263333	-0.0546906	-0.653558
GNG10	NA	NA	NA	NA	NA	NA	NA	NA	NA	-1.04353	-1.00997	-1.2402	NA	-0.452459	-0.342123	-0.822039	-0.891947	-0.472532	NA	-0.763205	NA	NA	NA	NA	NA	NA	0.0316494
GNG2	0.465668	0.531714	0.427325	0.242585	0.484224	0.428105	-0.55506	-0.421009	-0.507792	0.220306	0.175141	0.151107	0.527342	0.554757	0.669933	0.553312	0.589293	0.550686	0.744985	0.511536	-0.570545	-0.374407	-0.297562	-0.369978	-0.888825	-0.939519	1.49667
GNG5	-0.173129	-0.36762	-0.0179837	NA	-0.604378	-0.653458	NA	NA	NA	-0.486521	-0.421833	-0.438898	-0.100383	-0.00252992	-0.076754	-0.176727	-0.521504	-0.204546	-0.389708	-0.533089	NA	NA	NA	NA	NA	NA	0.332796
GNL1	0.197058	0.0804685	0.132447	0.381681	0.300034	0.215598	0.218346	0.244304	0.188509	0.0628616	0.0550692	-0.081731	0.324845	0.394971	0.41772	0.403731	0.465094	0.552927	0.412579	0.472191	-0.588746	-0.000936892	-0.236931	-0.887145	0.0458797	-0.351641	-0.0512473
GNL2	NA	-1.13155	NA	-0.778384	-1.09902	NA	-0.140601	-0.452527	-0.372913	-0.466582	-0.440541	-0.292766	-0.0261257	0.0507188	0.185204	0.445291	-0.106269	-0.0374951	-0.0828382	-0.0147921	NA	NA	NA	NA	NA	NA	-0.615758
GNL3	-0.114786	-0.0703714	-0.14164	0.00959032	-0.100427	-0.285099	0.261374	0.441569	0.391095	0.1049	0.051926	0.0978119	0.336253	0.510453	0.470798	0.574194	0.635047	0.622711	0.453001	0.611057	NA	NA	NA	NA	NA	NA	-0.00964746
GNL3L	NA	NA	NA	NA	NA	NA	-0.0931296	-0.0701429	-0.231637	-0.448156	-0.610598	-0.206455	0.0202769	0.0901376	0.0490032	-0.100312	-0.119544	-0.0130829	-0.0523804	-0.0336189	NA	NA	NA	NA	NA	NA	-0.639074
GNPAT	NA	-0.91862	-0.985404	NA	NA	NA	NA	NA	-0.771156	NA	NA	NA	0.188251	0.230679	0.161954	-0.0746148	-0.241806	0.139115	-0.258379	0.000927166	NA	NA	NA	NA	NA	NA	0.63337
GNPDA1	0.522435	0.581769	0.535734	0.381681	0.520758	0.490777	0.585111	0.712963	0.61578	0.526273	0.446119	0.547911	0.717919	0.55064	0.522033	0.585448	0.488926	0.545285	0.187523	0.51038	0.431959	0.101127	0.149956	0.486706	0.456131	0.423614	0.119022
GNPDA2	-0.150464	-0.057408	-0.146162	-0.0229463	-0.192368	-0.220399	-0.429197	-0.421009	-0.25964	-0.550205	-0.308464	-0.292766	-0.181606	-0.250167	-0.376655	-0.523709	0.0508349	0.225744	-0.014832	0.152579	-0.186165	-0.441267	-0.514091	-0.400989	-0.38143	-0.332064	0.890562
GNPNAT1	-0.354869	-0.320236	-0.455962	-0.248362	-0.582436	-0.605938	-0.177117	-0.0976524	-0.236265	-0.83314	-0.831635	NA	-0.1449	-0.0698695	-0.087851	-0.0414445	-0.179975	-0.124181	0.0237709	-0.155871	-1.21193	-0.213004	-0.972445	-0.8185	-1.00856	-0.820662	0.17783
GNS	-0.514608	-0.355624	-0.908307	-0.366056	-1.06364	-0.578539	-0.576451	-0.718373	NA	-0.497864	NA	-0.96402	-0.303852	-0.295104	-0.175187	-0.314793	-0.153464	-0.365794	-0.15646	-0.357652	0.087474	0.355625	-0.320171	-0.509778	-0.68383	-0.232804	-0.25359
GOLGA2	-0.787592	-0.387965	-0.593365	-0.966528	-0.68593	-0.908247	-0.525972	-0.262926	-0.213214	-0.581949	-0.454779	-0.491395	0.282788	-0.00118934	0.0306659	0.0022251	0.142797	0.0897936	0.573678	0.461542	-0.267315	-0.711392	-0.208156	-0.183982	-0.188717	-0.287652	0.052539
GOLGA3	0.0440396	0.0603209	0.0584711	-0.253024	-0.00112838	-0.0647908	-0.0387753	-0.19114	0.0316141	-0.15679	-0.174276	-0.12743	0.515145	0.501829	0.404856	0.685201	0.649513	0.509871	0.656409	0.813298	0.289403	0.113038	0.389245	0.440151	0.445071	0.327422	0.240175
GOLGA4	-0.465506	-0.556774	-0.437789	0.0585355	NA	-0.756241	-0.380862	-0.442251	-0.18388	-0.439549	NA	NA	0.106993	-0.164842	0.461373	-0.0736804	-0.152406	0.478688	0.0219	0.116942	0.0126469	-0.0127534	0.0668132	-0.0692441	-0.0698509	-0.0978661	0.391149
GOLGA5	NA	NA	NA	NA	NA	NA	NA	NA	NA	-0.962993	-0.956055	-0.635073	-0.411669	-0.172278	-0.351909	-0.0749422	-0.0807169	0.0704984	-0.034016	-0.382742	-0.926624	-0.118316	-0.50289	-0.959712	-0.774177	-0.839885	-0.223745
GOLGA7	NA	-1.24138	NA	NA	NA	NA	NA	NA	NA	NA	-0.925984	-1.09281	-0.466217	-0.270677	-0.285889	-0.156021	-0.927259	-0.500785	NA	-0.61404	NA	NA	NA	NA	NA	NA	0.0634866
GOLGB1	-0.558721	-0.528146	-0.681896	-0.462538	NA	-0.668093	-0.382537	-0.437543	-0.236265	-0.821392	NA	-0.497945	0.286769	0.784025	0.646671	0.459884	0.13751	0.213384	0.242179	0.234035	NA	NA	NA	NA	NA	NA	0.49884
GOLPH3	-0.624592	-0.350745	-0.265501	-0.575835	-0.448421	-0.786326	-0.278399	-0.583162	-0.723443	-0.0649166	-0.0956535	-0.110964	0.30102	0.198081	0.213573	0.102109	0.334142	0.380284	0.303375	0.404582	0.0668132	-0.422632	-0.213433	-0.4094	-0.472798	-0.0486744	-0.389088
GOLPH3L	NA	NA	NA	NA	-1.20487	NA	NA	NA	NA	-0.629734	NA	NA	0.240045	-0.186746	-0.0930705	-0.269952	-0.527934	-0.527036	-0.517483	-0.58205	-0.615888	-0.437202	-0.804565	-1.04025	-1.05727	-1.13191	-0.746218
GOLT1B	-0.861748	NA	-0.947872	NA	-0.793179	NA	-0.523022	NA	-0.939901	-0.328984	-0.127608	-0.206455	NA	-0.591124	-0.548133	NA	-0.829366	-0.767491	-0.345867	-0.450502	NA	NA	NA	NA	NA	NA	0.313536
GON7	-0.0517931	0.0381225	0.0124401	-0.21478	-0.264782	-0.256424	-0.652617	-0.147261	-0.132029	0.13447	-0.433838	0.106148	-0.102491	-0.276546	-0.331307	NA	0.0146537	0.0513998	-0.00226288	0.0818534	NA	NA	NA	NA	NA	NA	0.484302
GOPC	NA	-1.04395	NA	-1.0908	NA	NA	-0.965338	-0.999927	-0.412339	-0.1685	NA	NA	-0.17023	-0.291921	-0.0631922	-0.10432	-0.292476	-0.372561	-0.369738	-0.30905	-0.290827	-0.367343	0.205582	-0.366008	-0.190413	-0.253344	0.272395
GORASP2	0.0830971	0.0804685	0.147647	0.0710731	0.0322898	0.0704819	0.192765	0.291105	0.353191	0.0667642	0.0625121	0.0836556	0.574879	0.4941	0.508322	0.213363	0.42088	0.481999	0.453872	0.457009	0.258263	0.324566	0.446264	0.205091	0.274075	0.247245	0.0727768
GOSR1	-0.807639	-0.726173	NA	-0.436355	-0.502466	-0.889875	-0.540562	-0.290557	-0.494443	-0.182222	-0.54145	-0.109623	-0.13564	-0.152299	-0.0813605	-0.0903099	-0.0855016	-0.179451	0.0522913	-0.0874393	-0.499437	-0.649666	-0.480652	-0.8559	-0.552746	-0.407265	-0.486833
GOSR2	-0.697	-0.406536	-0.358228	NA	NA	NA	-0.371238	-0.790832	-0.617873	-0.251444	-0.185263	-0.369774	-0.328524	-0.563223	-0.518294	-0.35153	0.11882	0.0549829	0.129935	0.0503216	-0.624592	-0.359684	-0.808754	-0.0707471	-0.331194	-0.519795	-0.60222
GOT1	0.417561	0.39763	0.427325	0.427919	0.39479	0.400303	0.488392	0.521114	0.508743	0.504168	0.506239	0.468065	0.827315	0.846572	0.751537	0.589135	0.585896	0.72217	0.422587	0.561653	0.426899	0.348647	0.258263	0.418183	0.39411	0.389245	-0.117728
GOT2	1.2143	1.217	1.2372	1.00447	0.96393	0.910755	1.20186	0.85014	0.981629	0.998776	1.22612	1.16447	1.55762	1.62981	1.66678	1.276	1.25597	1.41329	1.4083	1.41539	1.15851	1.17192	0.978804	1.05469	1.02537	0.98568	0.493306
GPA33	-0.141148	-0.0978154	-0.15647	-0.0129173	-0.124439	-0.0937773	-0.558454	-0.516043	-0.610466	-0.839879	-0.800584	-1.04745	-0.323369	NA	NA	-0.288056	0.192673	0.105344	-0.106863	0.198742	-0.55101	-0.0717543	-0.455607	-1.28618	-0.32674	-0.663962	0.844755
GPALPP1	-0.747004	-0.868306	-0.79712	-0.305532	-0.599058	-0.445198	-0.55506	-0.652454	-0.712472	-1.00597	-0.79888	-0.716326	-0.0857222	-0.234308	-0.184359	-0.100915	-0.144364	-0.1174	-0.0464222	-0.0837764	-1.0879	-0.559939	-0.675956	-1.01542	-0.406575	-0.836281	NA
GPATCH1	NA	-1.10405	-0.82996	-0.973121	-0.977733	-1.07938	NA	NA	-0.989958	NA	NA	NA	-0.127488	-0.198355	-0.0672071	-0.425342	-0.293822	-0.394801	-0.303375	-0.331492	NA	NA	NA	NA	NA	NA	-0.684603
GPATCH11	-1.13385	NA	NA	NA	-0.72352	NA	NA	NA	-0.594264	NA	NA	NA	-0.319235	-0.624883	-0.61143	-0.592216	-0.339091	-0.364888	-0.287377	-0.333788	NA	NA	NA	NA	NA	NA	NA
GPATCH4	NA	NA	NA	NA	NA	NA	-0.41159	-0.62283	-0.458773	-1.09775	-0.55905	NA	-0.0926053	-0.125405	-0.141824	0.0165881	-0.608514	-1.06246	-0.661798	-0.694034	NA	NA	NA	NA	NA	NA	-0.281851
GPATCH8	-0.271241	-0.440044	-0.451669	-0.49503	NA	NA	-0.421177	-0.788794	-0.928096	-0.711025	NA	-0.543362	0.136771	0.088366	0.188162	0.0421343	0.199002	0.187813	0.272795	0.125294	NA	NA	NA	NA	NA	NA	-0.513151
GPBP1	NA	NA	NA	-0.590827	-0.868092	NA	-0.635612	-0.848463	NA	NA	NA	NA	-0.541338	-0.598613	-0.791874	-0.56434	-0.676748	-0.599711	-0.584957	-0.772859	NA	NA	NA	NA	NA	NA	-1.10935
GPD1L	-0.284249	-0.163389	-0.195684	-0.183195	0.0189156	0.13455	-0.568498	-0.520696	-0.412339	-0.616421	-1.0281	NA	0.0184866	-0.157992	-0.0548022	0.439364	0.106928	0.220548	0.289505	0.269343	0.388025	0.320072	0.0833266	0.293793	6.11146e-05	0.254516	0.184273
GPD2	-0.0315343	-0.111455	-0.0293649	-0.147845	-0.302921	-0.445198	-0.523022	-0.504937	-0.631851	-0.376979	-0.180215	-0.398832	0.3077	0.457795	0.321971	0.255439	0.557558	0.679902	0.582441	0.688441	0.440151	0.557408	0.466614	0.217746	0.302986	0.214656	-0.179753
GPHN	NA	-0.936384	NA	NA	NA	NA	-1.24102	NA	-0.630306	-0.532612	NA	-0.477207	0.202335	-0.0110701	0.143401	0.0578613	-0.403289	-0.259173	-0.395168	-0.15896	0.194294	0.174144	0.173327	0.0448068	0.256441	0.199262	-0.484758
GPI	1.5319	1.46571	1.59213	1.19784	1.34468	1.35566	1.71362	1.41696	1.35911	1.11339	1.41257	1.20872	3.84391	4.42326	5.71697	2.96266	2.08062	2.45328	1.86212	2.39615	0.576881	0.643729	0.502979	0.841692	0.665382	0.619456	0.999528
GPKOW	-0.558721	-0.617096	-0.543423	-0.39443	-0.531099	-0.406491	0.147181	0.109351	0.109037	-0.0728523	-0.24626	-0.145307	0.346889	0.184504	0.153432	0.334218	0.0631263	-0.102393	0.142478	0.00669732	-0.571042	-0.672999	-0.489725	-0.543794	-0.635537	-0.723438	-0.451837
GPN1	-0.360268	-0.294405	-0.290931	-0.199095	-0.415693	-0.548433	-0.350424	-0.0147687	-0.172445	-0.142973	-0.509818	-0.302882	-0.0561837	-0.134274	0.0494845	-0.126222	-0.264659	-0.07515	-0.34265	-0.184019	-0.192909	-0.00377218	-0.341217	-0.326939	-0.206084	-0.318627	0.292487
GPN3	NA	-1.03225	NA	NA	NA	NA	-0.872092	-0.861205	-0.782028	NA	NA	NA	-0.858126	-0.66867	-0.826621	-0.883251	-0.492209	-0.441662	-0.551542	-0.421471	NA	NA	NA	NA	NA	NA	0.230915
GPR171	NA	NA	NA	-0.811862	NA	-1.08873	-0.414026	-0.56929	-0.468454	-0.796715	-0.681883	-0.739564	-0.441902	-0.516934	-0.499428	-0.43554	-0.578653	-0.581544	-0.4781	-0.959828	-1.10436	-0.533413	-0.7092	-0.949221	-0.977269	-1.00609	NA
GPR183	-0.251793	-0.315619	-0.23195	-0.438165	-0.364331	-0.411208	-0.667539	-1.00974	-0.472401	-0.769792	-0.730998	-0.837255	-0.714733	-0.94209	-0.865641	NA	-0.554897	-0.378804	-0.301354	-0.253352	NA	NA	NA	NA	NA	NA	-0.814198
GPR89B	-0.80293	NA	-0.836075	-1.03994	-0.678431	-0.799781	-0.76421	-0.7335	-0.740089	-0.884824	-0.79183	-0.752202	NA	NA	NA	NA	NA	NA	NA	NA	NA	NA	NA	NA	NA	NA	-0.23741
GPRIN3	-0.175199	-0.531403	-0.216426	-0.0955622	-0.223377	-0.306419	-0.250916	-0.433556	-0.427184	-0.688865	-1.03151	-0.82165	0.046596	0.0444358	0.077151	0.0681851	0.332726	0.433617	0.616181	0.478629	-0.32998	-0.389141	-0.12997	-0.758593	-0.535231	-0.571324	-0.773505
GPS1	0.237302	0.258927	0.156984	0.0522582	0.137626	0.0619886	0.309182	-0.100413	-0.043938	0.217649	0.166818	0.259199	0.417831	0.404805	0.562477	0.526221	0.574137	0.531212	0.462673	0.502798	0.419034	0.552273	0.406774	0.221351	0.281489	0.300429	0.000778793
GPS2	-0.854619	-0.754291	-0.812798	-1.21639	NA	NA	NA	NA	-0.761966	NA	NA	NA	-0.208671	-0.526039	-0.4755	-0.331462	-0.182954	-0.678133	-0.431012	-0.970625	NA	NA	NA	NA	NA	NA	-0.453893
GPSM3	0.165953	0.17267	0.0832431	-0.521269	-0.417444	-0.396692	NA	NA	NA	-0.616421	-0.631744	-0.294825	0.465776	0.165797	0.306836	0.282752	0.473648	0.502356	0.6467	0.60011	NA	NA	NA	NA	NA	NA	0.627464
GPX1	0.557815	0.517064	0.484853	0.244598	0.384922	0.378413	-0.0454318	-0.089493	-0.0803858	0.316508	0.243485	0.269662	0.861089	0.751596	0.690736	0.421267	0.788486	0.823068	0.824028	0.697057	0.18618	0.228315	-0.000523389	0.310804	-0.0186192	0.149956	0.423354
GPX4	0.653713	0.600806	0.674029	0.784775	0.610771	0.57645	0.309182	0.396172	0.299345	0.0501027	-0.143638	-0.0589894	0.143295	0.449524	0.135122	0.436852	0.522086	0.656863	0.477066	0.469448	0.120927	-0.710936	-0.930774	0.160625	0.061494	0.248091	0.836522
GPX7	-0.879476	NA	-0.999434	NA	NA	NA	NA	NA	NA	NA	NA	-0.956644	0.150383	-0.123893	-0.118991	0.10269	0.721472	-0.429501	-0.34219	-0.253229	NA	NA	NA	NA	NA	NA	-0.504299
GRAMD1A	NA	NA	NA	NA	NA	NA	NA	NA	-1.02585	NA	-0.928054	NA	-0.514325	-0.522131	0.159629	-0.162971	-0.787995	-0.739531	-0.70839	-0.245538	NA	NA	NA	NA	NA	NA	NA
GRAP	0.0475821	0.118591	-0.0198402	0.0772742	-0.00533528	-0.111853	-0.817435	NA	-0.507792	NA	NA	-0.837255	-0.0712311	-0.275263	-0.118659	-0.0547789	0.273253	0.328786	0.28534	0.302684	-0.0945895	-0.376863	-0.328679	-0.51188	-0.530775	-1.12228	-0.0680834
[truncated: 8,415 more rows]
