# Supplementary material for: The Proteomic Landscape of Resting and Activated CD4+ T Cells Reveal Insights into Cell Differentiation and Function
Source: Int J Mol Sci. 2020 Dec 29;22(1):275. doi: 10.3390/ijms22010275 (PMC7795831; doi:10.3390/ijms22010275)
Supplement: Supplementary file 1 [file ijms-22-00275-s001.zip › Supplementary_table_7.xlsx]

## Sheet: Table7
Supplementary Table 7. Lists of proteins identified from current study and previous studies on CD4+ T-cell proteomics
Current study Resting CD4+ T	Current study Activated CD4+ T	Rieckmann Resting CD4+ T	Rieckmann Activated CD4+ T	Gerner Resting CD4+ T	Gerner Activated CD4+ T	Mitchell Resting CD4+ T
MARCH5	MARCH5	A1BG	A1BG	AAK1	AAK1	MARCH5
AAAS	AAAS	A2M	A2M	AAMP	AAMP	MARCH10
AAK1	AAK1	A2ML1	A2ML1	AARS1	AARS1	A1BG
AAMP	AAMP	AAAS	AAAS	AARS2	AARS2	A2M
AAR2	AAR2	AACS	AACS	AARSD1	AARSD1	AAAS
AARS	AARS	PRXL2C	AAGAB	AASDHPPT	AASDHPPT	AACS
AARS2	AARS2	AAGAB	AAK1	ABAT	ABAT	AAGAB
AARSD1	AARSD1	AAK1	AAK1	ABCA10	ABCA10	AAK1
AASDHPPT	AASDHPPT	AAK1	AAMDC	ABCB1	ABCB1	AAMP
AATF	AATF	AAMDC	AAMP	ABCC1	ABCC1	AAR2
ABAT	ABAT	AAMP	AAR2	ABCE1	ABCE1	AARS1
ABCB7	ABCB7	AAR2	AARS1	ABCF1	ABCF1	AARS2
ABCC1	ABCC1	AARS1	AARS2	ABCF2	ABCF2	AASDHPPT
ABCD3	ABCD3	AARS2	AARSD1	ABCF3	ABCF3	AASS
ABCE1	ABCE1	AARSD1	AASDHPPT	ABHD10	ABHD10	AATF
ABCF1	ABCF1	AASDHPPT	AASS	ABHD14B	ABHD14B	ABAT
ABCF2	ABCF2	AASS	AATF	ABHD17A	ABHD17A	ABCA12
ABCF3	ABCF3	AATF	AATK	ABI1	ABI1	ABCB1
ABHD10	ABHD10	ABAT	ABAT	ABI3	ABI3	ABCB10
ABHD11	ABHD11	ABCA1	ABCA1	ABLIM1	ABLIM1	ABCB5
ABHD12	ABHD12	ABCA13	ABCA13	ABR	ABR	ABCB7
ABHD14B	ABHD14B	ABCA7	ABCA7	ABRAXAS2	ABRAXAS2	ABCB8
ABHD16A	ABI1	ABCB1	ABCB1	ACAA1	ACAA1	ABCC4
ABI1	ABI3	ABCB10	ABCB10	ACAA2	ACAA2	ABCD1
ABI3	ABLIM1	ABCB6	ABCB6	ACACA	ACACA	ABCD2
ABLIM1	ABR	ABCB7	ABCB7	ACAD10	ACAD10	ABCD3
ABR	ABRACL	ABCB8	ABCB8	ACAD8	ACAD8	ABCE1
ABRACL	ABRAXAS1	ABCC1	ABCC1	ACAD9	ACAD9	ABCF1
ABRAXAS1	ABRAXAS2	ABCC10	ABCC10	ACADM	ACADM	ABCF2
ABRAXAS2	ABT1	ABCC3	ABCC3	ACADS	ACADS	ABCF3
ABT1	ACAA1	ABCC4	ABCC4	ACADSB	ACADSB	ABHD10
ACAA1	ACAA2	ABCD1	ABCC5	ACADVL	ACADVL	ABHD11
ACAA2	ACACA	ABCD2	ABCD1	ACAP1	ACAP1	ABHD12
ACACA	ACAD8	ABCD3	ABCD2	ACAP2	ACAP2	ABHD12B
ACAD8	ACAD9	ABCD4	ABCD3	ACAT1	ACAT1	ABHD14B
ACAD9	ACADM	ABCE1	ABCD4	ACAT2	ACAT2	ABHD15
ACADM	ACADS	ABCF1	ABCE1	ACBD3	ACBD3	ABHD16A
ACADS	ACADSB	ABCF2	ABCF1	ACBD6	ACBD6	ABI1
ACADSB	ACADVL	ABCF3	ABCF2	ACIN1	ACIN1	ABI2
ACADVL	ACAP1	ABHD10	ABCF3	ACLY	ACLY	ABI3
ACAP1	ACAP2	ABHD10	ABHD10	ACO1	ACO1	ABITRAM
ACAP2	ACAT1	ABHD11	ABHD11	ACO2	ACO2	ABL1
ACAT1	ACAT2	ABHD12	ABHD12	ACOT1	ACOT1	ABLIM1
ACAT2	ACBD3	ABHD13	ABHD14B	ACOT13	ACOT13	ABLIM3
ACBD3	ACD	ABHD14B	ABHD16A	ACOT7	ACOT7	ABR
ACD	ACIN1	ABHD16A	ABHD17A	ACOT9	ACOT9	ABRACL
ACIN1	ACLY	ABHD17A	ABHD17B	ACOX1	ACOX1	ABRAXAS1
ACLY	ACO1	ABHD17B	ABHD6	ACP1	ACP1	ABRAXAS2
ACO1	ACO2	ABHD6	ABI1	ACP2	ACP2	ABT1
ACO2	ACOT1	ABI1	ABI2	ACSF2	ACSF2	AC099489.1
ACOT1	ACOT13	ABI2	ABI3	ACSF3	ACSF3	AC118549.1
ACOT13	ACOT2	ABI3	ABL1	ACSL1	ACSL1	ACAA1
ACOT7	ACOT7	ABL1	ABL2	ACSL3	ACSL3	ACAA2
ACOT8	ACOT9	ABL2	ABLIM1	ACSL4	ACSL4	ACACA
ACOT9	ACOX1	ABLIM1	ABLIM3	ACSL5	ACSL5	ACAD8
ACOX1	ACOX3	ABLIM1	ABR	ACSS1	ACSS1	ACAD9
ACOX3	ACP1	ABLIM3	ABRACL	ACTA1	ACTA1	ACADM
ACP1	ACSF2	ABR	ABT1	ACTB	ACTB	ACADS
ACSF2	ACSF3	ABRACL	ABTB1	ACTBL2	ACTBL2	ACADSB
ACSF3	ACSL1	ABT1	ABTB2	ACTG1	ACTG1	ACADVL
ACSL1	ACSL3	ABTB2	ACAA1	ACTL6A	ACTL6A	ACAP1
ACSL3	ACSL4	ACAA1	ACAA2	ACTN1	ACTN1	ACAP2
ACSL4	ACSL5	ACAA2	ACACA	ACTN4	ACTN4	ACAT1
ACSL5	ACSS1	ACACA	ACAD10	ACTR1A	ACTR1A	ACAT2
ACSS1	ACTB	ACAD10	ACAD8	ACTR1B	ACTR1B	ACBD3
ACTB	ACTBL2	ACAD8	ACAD9	ACTR2	ACTR2	ACBD6
ACTBL2	ACTC1	ACAD9	ACADM	ACTR3	ACTR3	ACCS
ACTC1	ACTG1	ACADM	ACADS	ADA	ADA	ACD
ACTG1	ACTL6A	ACADS	ACADSB	ADA2	ADA2	ACIN1
ACTL6A	ACTN1	ACADSB	ACADVL	ADAM10	ADAM10	ACLY
ACTN1	ACTN4	ACADVL	ACAP1	ADCY9	ADCY9	ACO1
ACTN4	ACTR10	ACAP1	ACAP2	ADD1	ADD1	ACO2
ACTR10	ACTR1A	ACAP2	ACAT1	ADD3	ADD3	ACOT1
ACTR1A	ACTR1B	ACAT1	ACAT1	ADGRE5	ADGRE5	ACOT13
ACTR1B	ACTR2	ACAT2	ACAT2	ADGRG1	ADGRG1	ACOT2
ACTR2	ACTR3	ACBD3	ACBD3	ADH5	ADH5	ACOT7
ACTR3	ACTR5	ACBD4	ACBD5	ADK	ADK	ACOT9
ACTR5	ACTR8	ACBD5	ACBD6	ADO	ADO	ACOX1
ACTR8	ACYP1	ACBD6	ACD	ADPGK	ADPGK	ACOX3
ACYP1	ADA	ACD	ACIN1	ADPRS	ADPRS	ACP1
ADA	ADA2	ACIN1	ACLY	ADRM1	ADRM1	ACP2
ADA2	ADAM10	ACLY	ACO1	ADSL	ADSL	ACP6
ADAM10	ADAM8	SDHAF3	ACO2	ADSS2	ADSS2	ACSF2
ADAR	ADAR	ACO1	ACOT11	AFG3L2	AFG3L2	ACSF3
ADARB1	ADARB1	ACO2	ACOT13	AFTPH	AFTPH	ACSL1
ADD1	ADD1	ACOT1	ACOT2	AGA	AGA	ACSL3
ADD3	ADD3	ACOT11	ACOT7	AGAP2	AGAP2	ACSL4
ADH5	ADH5	ACOT13	ACOT7	AGFG1	AGFG1	ACSL5
ADI1	ADI1	ACOT2	ACOT8	AGFG2	AGFG2	ACSL6
ADK	ADK	ACOT7	ACOT9	AGK	AGK	ACSM3
ADNP	ADNP	ACOT8	ACOX1	AGL	AGL	ACSS1
ADO	ADO	ACOT9	ACOX3	AGMAT	AGMAT	ACSS2
ADPGK	ADPGK	ACOX1	ACP1	AGO2	AGO2	ACTA1
ADPRHL2	ADPRHL2	ACOX3	ACP2	AGO3	AGO3	ACTB
ADRM1	ADRM1	ACP1	ACP5	AGPS	AGPS	ACTBL2
ADSL	ADSL	ACP2	ACP6	AGTRAP	AGTRAP	ACTC1
ADSS	ADSS	ACP6	ACP3	AHCY	AHCY	ACTG1
AFF4	AEBP2	ACSF2	ACSF2	AHCYL1	AHCYL1	ACTL6A
AFG3L2	AFDN	ACSF3	ACSF3	AHCYL2	AHCYL2	ACTN1
AFTPH	AFF4	ACSL1	ACSL1	AHNAK	AHNAK	ACTN4
AGA	AFG3L2	ACSL3	ACSL3	AHR	AHR	ACTR10
AGAP2	AFTPH	ACSL4	ACSL4	AHSA1	AHSA1	ACTR1A
AGFG1	AGA	ACSL5	ACSL5	AIDA	AIDA	ACTR1B
AGFG2	AGAP2	ACSL6	ACSL6	AIF1	AIF1	ACTR2
AGK	AGFG1	ACSM3	ACSM3	AIFM1	AIFM1	ACTR3
AGL	AGFG2	ACSS1	ACSS1	AIMP1	AIMP1	ACTR3B
AGMAT	AGK	ACSS2	ACSS2	AIMP2	AIMP2	ACTR5
AGO1	AGL	ACTB	ACTB	AIP	AIP	ACTR6
AGO2	AGMAT	ACTB	ACTB	AK2	AK2	ACTR8
AGO3	AGO1	ACTBL2	ACTBL2	AK3	AK3	ACYP1
AGPAT1	AGO2	ACTC1	ACTC1	AK6	AK6	ACYP2
AGPAT3	AGO3	ACTG1	ACTG1	AKAP1	AKAP1	ADA
AGPAT5	AGPAT1	ACTG1	ACTG1	AKAP10	AKAP10	ADA2
AGPS	AGPAT5	ACTG1	ACTL6A	AKAP11	AKAP11	ADAL
AGTPBP1	AGPS	ACTL6A	ACTN1	AKAP13	AKAP13	ADAM10
AGTRAP	AGTPBP1	ACTN1	ACTN1	AKR1A1	AKR1A1	ADAM17
AHCTF1	AHCTF1	ACTN1	ACTN1	AKR1B1	AKR1B1	ADAMTS10
AHCY	AHCY	ACTN1	ACTN2	AKR1C1	AKR1C1	ADAMTS12
AHCYL1	AHCYL1	ACTN2	ACTN4	AKR7A2	AKR7A2	ADAMTS2
AHCYL2	AHCYL2	ACTN4	ACTN4	AKT1	AKT1	ADAMTS4
AHNAK	AHNAK	ACTR10	ACTR10	AKT2	AKT2	ADAR
AHSA1	AHSA1	ACTR1A	ACTR1A	ALAD	ALAD	ADARB1
AIDA	AHSG	ACTR1B	ACTR1B	ALDH16A1	ALDH16A1	ADAT1
AIF1	AIDA	ACTR2	ACTR2	ALDH18A1	ALDH18A1	ADAT3
AIFM1	AIFM1	ACTR3	ACTR3	ALDH1A1	ALDH1A1	ADCK1
AIMP1	AIMP1	ACTR3B	ACTR3B	ALDH1B1	ALDH1B1	ADCY1
AIMP2	AIMP2	ACTR5	ACTR5	ALDH2	ALDH2	ADD1
AIP	AIP	ACTR6	ACTR6	ALDH4A1	ALDH4A1	ADD2
AK2	AK2	ACTR8	ACTR8	ALDH5A1	ALDH5A1	ADD3
AK3	AK3	ACVR1	ACVR1	ALDH6A1	ALDH6A1	ADGB
AK5	AK4	ACY1	ACY1	ALDH7A1	ALDH7A1	ADGRE5
AKAP11	AK6	ACYP1	ACY3	ALDH9A1	ALDH9A1	ADGRF5
AKAP13	AKAP11	ACYP2	ACYP1	ALDOA	ALDOA	ADGRG4
AKAP17A	AKAP13	ADA	ACYP2	ALDOC	ALDOC	ADGRV1
AKAP2	AKAP17A	ADAL	ADA	ALG5	ALG5	ADH5
AKAP8	AKAP2	ADAM10	ADAL	ALOX12	ALOX12	ADI1
AKAP8L	AKAP8	ADAM15	ADAM10	ALOX5	ALOX5	ADK
AKAP9	AKAP8L	ADAM17	ADAM15	ALYREF	ALYREF	ADNP
AKNA	AKAP9	ADAM19	ADAM17	AMDHD2	AMDHD2	ADO
AKR1A1	AKNA	ADAM8	ADAM19	AMPD2	AMPD2	ADPGK
AKR1B1	AKR1A1	ADAM9	ADAM8	AMPD3	AMPD3	ADPRM
AKR1C3	AKR1B1	ADAMDEC1	ADAM9	ANK3	ANK3	ADPRS
AKR7A2	AKR1C3	ADAMTS1	ADAMDEC1	ANKFY1	ANKFY1	ADRM1
AKT1	AKR7A2	ADAMTS2	ADAMTS1	ANKHD1	ANKHD1	ADSL
AKT2	AKT1	ADAMTSL4	ADAMTS2	ANKLE2	ANKLE2	ADSS1
AKTIP	AKT2	ADAP1	ADAMTSL4	ANKMY2	ANKMY2	ADSS2
ALAD	AKTIP	ADAR	ADAP1	ANKRD13A	ANKRD13A	AFAP1L1
ALDH16A1	ALAD	ADAR	ADAR	ANKRD17	ANKRD17	AFF4
ALDH18A1	ALCAM	ADARB1	ADAR	ANKRD28	ANKRD28	AFG1L
ALDH1B1	ALDH16A1	ADAT2	ADARB1	ANKRD44	ANKRD44	AFG3L2
ALDH2	ALDH18A1	ADAT3	ADAT1	ANP32A	ANP32A	AFM
ALDH3A2	ALDH1B1	ADCK1	ADAT2	ANP32B	ANP32B	AFP
ALDH5A1	ALDH2	COQ8A	ADAT3	ANP32E	ANP32E	AFTPH
ALDH6A1	ALDH3A2	COQ8B	COQ8A	ANPEP	ANPEP	AGAP2
ALDH9A1	ALDH5A1	ADCK5	COQ8B	ANXA1	ANXA1	AGFG1
ALDOA	ALDH6A1	ADCY7	ADCK5	ANXA11	ANXA11	AGFG2
ALDOC	ALDH9A1	ADD1	ADCY6	ANXA2	ANXA2	AGGF1
ALG1	ALDOA	ADD2	ADCY7	ANXA3	ANXA3	AGK
ALG12	ALDOC	ADD3	ADD1	ANXA4	ANXA4	AGL
ALG2	ALG1	ADD3	ADD2	ANXA5	ANXA5	AGL
ALG3	ALG12	ADH4	ADD3	ANXA6	ANXA6	AGMAT
ALG5	ALG2	ADH5	ADH4	ANXA7	ANXA7	AGPAT1
ALG8	ALG3	ADI1	ADH5	AP1B1	AP1B1	AGPAT2
ALKBH5	ALG5	ADIPOQ	ADI1	AP1G1	AP1G1	AGPAT3
ALMS1	ALG8	ADK	ADIPOQ	AP1G2	AP1G2	AGPAT5
ALOX15	ALKBH5	ADNP	ADK	AP1M1	AP1M1	AGPS
ALOX5	ALMS1	ADNP2	ADNP	AP1S2	AP1S2	AGT
ALOX5AP	ALOX5AP	ADO	ADNP2	AP2A1	AP2A1	AGTPBP1
ALYREF	ALYREF	ADPGK	ADO	AP2A2	AP2A2	AGTRAP
AMDHD2	AMDHD2	ADPRH	ADPGK	AP2B1	AP2B1	AGTRAP
AMPD2	AMPD2	ADPRS	ADPRH	AP2M1	AP2M1	AHCTF1
AMPD3	AMPD3	GRK2	ADPRS	AP3B1	AP3B1	AHCY
ANAPC1	ANAPC1	ADRM1	GRK2	AP3D1	AP3D1	AHCYL1
ANAPC4	ANAPC15	ADSL	GRK3	AP3M1	AP3M1	AHCYL2
ANAPC5	ANAPC16	ADSS2	ADRM1	AP3S1	AP3S1	AHDC1
ANAPC7	ANAPC4	AEBP2	ADSL	APAF1	APAF1	AHNAK
ANGEL2	ANAPC5	TLE5	ADSS2	APBB1IP	APBB1IP	AHSA1
ANK3	ANAPC7	AFAP1	AEBP2	APEH	APEH	AHSG
ANKFY1	ANK3	AFAP1L2	TLE5	APEX1	APEX1	AIDA
ANKHD1	ANKFY1	AFF1	AFAP1	API5	API5	AIFM1
ANKLE2	ANKHD1	AFF3	AFAP1L2	APIP	APIP	AIG1
ANKRD11	ANKLE2	AFF4	AFF1	APMAP	APMAP	AIMP1
ANKRD13A	ANKRD11	AFG3L2	AFF3	APOB	APOB	AIMP2
ANKRD27	ANKRD13A	AFM	AFF4	APOBR	APOBR	AIP
ANKRD28	ANKRD17	AFTPH	AFG3L2	APOD	APOD	AK1
ANKRD44	ANKRD27	AGA	AFM	APOL2	APOL2	AK2
ANKS1A	ANKRD28	AGAP2	AFMID	APOL3	APOL3	AK3
ANKZF1	ANKRD44	AGAP3	AFTPH	APOO	APOO	AK5
ANO6	ANKS1A	AGFG1	AGA	APOOL	APOOL	AKAP1
ANP32A	ANKZF1	AGFG2	AGAP2	APPL1	APPL1	AKAP10
ANP32B	ANO6	AGGF1	AGAP3	APPL2	APPL2	AKAP11
ANP32E	ANP32A	AGK	AGFG1	APRT	APRT	AKAP12
ANXA1	ANP32B	AGL	AGFG2	ARAF	ARAF	AKAP13
ANXA11	ANP32E	AGMAT	AGK	ARAP1	ARAP1	AKAP17A
ANXA2	ANXA1	AGO1	AGL	ARAP2	ARAP2	AKAP7
ANXA3	ANXA11	AGO2	AGMAT	ARCN1	ARCN1	AKAP8
ANXA4	ANXA2	AGO3	AGO1	ARF1	ARF1	AKAP8L
ANXA5	ANXA3	AGO4	AGO2	ARF6	ARF6	AKAP9
ANXA6	ANXA4	AGPAT1	AGO3	ARFGAP1	ARFGAP1	AKNA
ANXA7	ANXA5	AGPAT2	AGPAT1	ARFGAP2	ARFGAP2	AKR1A1
AP1B1	ANXA6	AGPAT3	AGPAT2	ARFGAP3	ARFGAP3	AKR1B1
AP1G1	ANXA7	AGPAT4	AGPAT3	ARFGEF1	ARFGEF1	AKR1C3
AP1G2	AP1B1	AGPAT5	AGPAT4	ARFGEF2	ARFGEF2	AKR7A2
AP1M1	AP1G1	GPAT4	AGPAT5	ARFIP1	ARFIP1	AKT1
AP1S1	AP1G2	LPCAT1	GPAT4	ARFIP2	ARFIP2	AKT1S1
AP1S2	AP1M1	AGPS	LPCAT1	ARHGAP1	ARHGAP1	AKT2
AP2A1	AP1S1	AGT	AGPS	ARHGAP15	ARHGAP15	AKT3
AP2A2	AP1S2	AGTPBP1	AGRN	ARHGAP17	ARHGAP17	AKTIP
AP2B1	AP2A1	AGTRAP	AGTPBP1	ARHGAP18	ARHGAP18	ALAD
AP2M1	AP2A2	AHCTF1	AGTRAP	ARHGAP25	ARHGAP25	ALDH16A1
AP2S1	AP2B1	AHCY	AHCTF1	ARHGAP26	ARHGAP26	ALDH18A1
AP3B1	AP2M1	AHCYL1	AHCY	ARHGAP27	ARHGAP27	ALDH1A1
AP3D1	AP2S1	AHCYL2	AHCYL1	ARHGAP30	ARHGAP30	ALDH1A2
AP3M1	AP3B1	AHDC1	AHCYL2	ARHGAP4	ARHGAP4	ALDH1B1
AP3S1	AP3D1	AHNAK	AHDC1	ARHGAP45	ARHGAP45	ALDH1L2
AP4S1	AP3M1	AHR	AHNAK	ARHGAP6	ARHGAP6	ALDH2
AP5B1	AP3S1	AHSA1	AHR	ARHGAP9	ARHGAP9	ALDH3A2
AP5Z1	AP4S1	AHSG	AHSA1	ARHGDIA	ARHGDIA	ALDH5A1
APAF1	AP5S1	AIDA	AHSG	ARHGDIB	ARHGDIB	ALDH6A1
APBB1	AP5Z1	AIF1	AIDA	ARHGEF1	ARHGEF1	ALDH7A1
APBB1IP	APAF1	AIFM1	AIF1	ARHGEF18	ARHGEF18	ALDH9A1
APEH	APBB1	AIFM2	AIFM1	ARHGEF2	ARHGEF2	ALDOA
APEX1	APBB1IP	AIG1	AIFM2	ARHGEF6	ARHGEF6	ALDOC
API5	APEH	CRYBG1	AIG1	ARHGEF7	ARHGEF7	ALG1
APIP	APEX1	AIM2	CRYBG1	ARIH1	ARIH1	ALG11
APMAP	API5	AIMP1	AIM2	ARIH2	ARIH2	ALG12
APOB	APIP	AIMP2	AIMP1	ARL2	ARL2	ALG13
APOBEC3C	APMAP	AIP	AIMP2	ARL2BP	ARL2BP	ALG2
APOBEC3D	APOA1	AK1	AIMP2	ARL3	ARL3	ALG5
APOBEC3G	APOA2	AK2	AIP	ARL6IP5	ARL6IP5	ALG6
APOBR	APOA4	AK3	AK2	ARL8A	ARL8A	ALG8
APOD	APOB	AK4	AK3	ARL8B	ARL8B	ALG9
APOL2	APOBEC3C	AK5	AK4	ARMC1	ARMC1	ALKBH1
APOL3	APOBEC3D	AK6	AK6	ARMC6	ARMC6	ALKBH2
APOO	APOBEC3G	AKAP1	AKAP1	ARMCX3	ARMCX3	ALKBH3
APOOL	APOBR	AKAP10	AKAP10	ARPC1B	ARPC1B	ALKBH4
APPL1	APOC3	AKAP11	AKAP11	ARPC2	ARPC2	ALKBH5
APRT	APOD	AKAP12	AKAP12	ARPC3	ARPC3	ALKBH8
AQR	APOE	AKAP13	AKAP13	ARPC4	ARPC4	ALMS1
ARAF	APOL2	AKAP17A	AKAP17A	ARPC5	ARPC5	ALOX12
ARAP1	APOL3	AKAP2	AKAP2	ARPC5L	ARPC5L	ALOX5AP
ARCN1	APOO	AKAP7	AKAP5	ARPP19	ARPP19	ALS2CL
ARF1	APOOL	AKAP8	AKAP7	ARRB1	ARRB1	ALYREF
ARF4	APPL1	AKAP8L	AKAP8	ARRB2	ARRB2	AMBP
ARF5	APRT	AKAP9	AKAP8L	ARSA	ARSA	AMDHD2
ARF6	AQR	AKNA	AKAP9	ASAH1	ASAH1	AMOTL1
ARFGAP1	ARAF	AKR1A1	AKNA	ASAP1	ASAP1	AMPD2
ARFGAP2	ARAP1	AKR1B1	AKR1A1	ASAP2	ASAP2	AMPD3
ARFGAP3	ARCN1	AKR1C3	AKR1B1	ASCC1	ASCC1	AMPD3
ARFGEF1	ARF1	AKR1D1	AKR1C3	ASF1A	ASF1A	AMY2A
ARFGEF2	ARF4	AKR7A2	AKR7A2	ASH2L	ASH2L	AMZ2
ARFIP1	ARF5	AKT1	AKT1	ASL	ASL	ANAPC1
ARFIP2	ARF6	AKT1S1	AKT1S1	ASMTL	ASMTL	ANAPC10
ARFRP1	ARFGAP1	AKT2	AKT2	ASNS	ASNS	ANAPC16
ARGLU1	ARFGAP2	AKT3	AKT3	ASPSCR1	ASPSCR1	ANAPC4
ARHGAP1	ARFGAP3	AKTIP	AKTIP	ASRGL1	ASRGL1	ANAPC5
ARHGAP15	ARFGEF1	ALAD	ALAD	ATAD1	ATAD1	ANAPC7
ARHGAP17	ARFGEF2	ALAD	ALAS1	ATAD3A	ATAD3A	ANGEL2
ARHGAP25	ARFIP1	ALAS1	ALCAM	ATE1	ATE1	ANGPTL4
ARHGAP27	ARFIP2	ALCAM	ALDH16A1	ATG13	ATG13	ANK1
ARHGAP30	ARFRP1	ALDH16A1	ALDH18A1	ATG16L1	ATG16L1	ANK2
ARHGAP31	ARGLU1	ALDH18A1	ALDH1A1	ATG3	ATG3	ANK3
ARHGAP4	ARHGAP1	ALDH1A1	ALDH1A2	ATG4B	ATG4B	ANKFY1
ARHGAP45	ARHGAP15	ALDH1B1	ALDH1B1	ATG7	ATG7	ANKHD1
ARHGAP5	ARHGAP17	ALDH2	ALDH2	ATIC	ATIC	ANKLE2
ARHGAP9	ARHGAP25	ALDH3A2	ALDH3A2	ATL2	ATL2	ANKMY1
ARHGDIA	ARHGAP27	ALDH3B1	ALDH3B1	ATL3	ATL3	ANKMY2
ARHGDIB	ARHGAP30	ALDH4A1	ALDH4A1	ATP11B	ATP11B	ANKRD11
ARHGEF11	ARHGAP31	ALDH5A1	ALDH5A1	ATP13A1	ATP13A1	ANKRD12
ARHGEF18	ARHGAP4	ALDH6A1	ALDH6A1	ATP1A1	ATP1A1	ANKRD13A
ARHGEF2	ARHGAP45	ALDH7A1	ALDH7A1	ATP1B3	ATP1B3	ANKRD13D
ARHGEF6	ARHGAP9	ALDH9A1	ALDH9A1	ATP2A2	ATP2A2	ANKRD17
ARHGEF7	ARHGDIA	ALDOA	ALDOA	ATP2A3	ATP2A3	ANKRD24
ARID1A	ARHGDIB	ALDOA	ALDOA	ATP2B1	ATP2B1	ANKRD26
ARID1B	ARHGEF11	ALDOC	ALDOC	ATP2B4	ATP2B4	ANKRD27
ARID2	ARHGEF18	GTF2A1L	GTF2A1L	ATP5F1A	ATP5F1A	ANKRD28
ARID4A	ARHGEF2	ALG1	ALG1	ATP5F1B	ATP5F1B	ANKRD30B
ARID4B	ARHGEF6	ALG10	ALG10	ATP5F1C	ATP5F1C	ANKRD44
ARIH1	ARHGEF7	ALG11	ALG11	ATP5F1D	ATP5F1D	ANKRD52
ARIH2	ARID1A	ALG12	ALG12	ATP5MF	ATP5MF	ANKRD54
ARL1	ARID1B	ALG13	ALG13	ATP5MG	ATP5MG	ANKRD9
ARL2	ARID2	ALG13	ALG2	ATP5PB	ATP5PB	ANKS1A
ARL2BP	ARID3B	ALG2	ALG3	ATP5PD	ATP5PD	ANKZF1
ARL3	ARID4A	ALG3	ALG5	ATP5PF	ATP5PF	ANO6
ARL6IP4	ARID4B	ALG5	ALG6	ATP5PO	ATP5PO	ANO8
ARL6IP5	ARIH1	ALG6	ALG8	ATP6V1A	ATP6V1A	ANP32A
ARL6IP6	ARIH2	ALG8	ALG9	ATP6V1B2	ATP6V1B2	ANP32B
ARL8A	ARL1	ALG9	ALKBH1	ATP6V1C1	ATP6V1C1	ANP32E
ARL8B	ARL2	ALKBH1	ALKBH2	ATP6V1D	ATP6V1D	ANP32E
ARMC1	ARL3	ALKBH2	ALKBH3	ATP6V1E1	ATP6V1E1	ANTXR2
ARMC10	ARL6IP4	ALKBH4	ALKBH4	ATP6V1F	ATP6V1F	ANXA1
ARMC6	ARL6IP5	ALKBH5	ALKBH5	ATP6V1G1	ATP6V1G1	ANXA10
ARMC8	ARL6IP6	ALKBH7	ALKBH7	ATP6V1H	ATP6V1H	ANXA11
ARMH3	ARL8A	ALKBH8	ALKBH8	ATXN10	ATXN10	ANXA2
ARMT1	ARL8B	ALMS1	ALMS1	ATXN2L	ATXN2L	ANXA3
ARPC1A	ARMC1	ALOX12	ALOX12	ATXN3	ATXN3	ANXA4
ARPC1B	ARMC10	ALOX12B	ALOX15	AUH	AUH	ANXA6
ARPC2	ARMC6	ALOX15	ALOX15B	AZGP1	AZGP1	ANXA7
ARPC3	ARMC8	ALOX15B	ALOX5	AZU1	AZU1	AP1B1
ARPC4	ARMCX3	ALOX5	ALOX5AP	B2M	B2M	AP1B1
ARPC5	ARMH3	ALOX5AP	ALPL	BABAM1	BABAM1	AP1G1
ARPC5L	ARMT1	ALPL	ALS2	BABAM2	BABAM2	AP1G2
ARPP19	ARPC1A	ALYREF	ALYREF	BACH1	BACH1	AP1M1
ARRB1	ARPC1B	AMACR	ALYREF	BAG1	BAG1	AP1S1
ARRB2	ARPC2	AMBP	AMBP	BAG2	BAG2	AP1S2
ARSA	ARPC3	AMBRA1	AMBRA1	BAG3	BAG3	AP2A1
ASAH1	ARPC4	AMDHD2	AMDHD2	BAG5	BAG5	AP2A2
ASAP1	ARPC5	AMFR	AMFR	BAG6	BAG6	AP2B1
ASCC1	ARPC5L	JAML	JAML	BANF1	BANF1	AP2M1
ASCC2	ARPP19	AMOT	AMPD2	BASP1	BASP1	AP2S1
ASCC3	ARRB1	AMPD2	AMPD3	BAX	BAX	AP3B1
ASDURF	ARRB2	AMPD3	AMT	BCAP29	BCAP29	AP3D1
ASF1A	ARSA	AMT	AMZ2	BCAP31	BCAP31	AP3M1
ASH2L	ASAH1	AMZ2	ANAPC1	BCAS3	BCAS3	AP3S1
ASL	ASAP1	ANAPC1	ANAPC10	BCAT2	BCAT2	AP4B1
ASMTL	ASCC1	ANAPC10	ANAPC11	BCCIP	BCCIP	AP4E1
ASNA1	ASCC2	ANAPC16	ANAPC16	BCKDHA	BCKDHA	AP4S1
ASNS	ASCC3	ANAPC2	ANAPC2	BCL10	BCL10	AP5B1
ASPSCR1	ASDURF	ANAPC4	ANAPC4	BCL2L1	BCL2L1	AP5M1
ATAD1	ASF1A	ANAPC5	ANAPC5	BCL2L13	BCL2L13	AP5Z1
ATAD2	ASF1B	ANAPC7	ANAPC7	BCL9L	BCL9L	APAF1
ATAD3A	ASH2L	ANG	ANG	BCR	BCR	APBA1
ATAD3B	ASL	ANGEL2	ANGEL2	BDH1	BDH1	APBA2
ATE1	ASMTL	ANGPTL3	ANGPT1	BDH2	BDH2	APBB1
ATF2	ASNA1	ANK1	ANGPTL3	BECN1	BECN1	APBB1IP
ATG16L1	ASNS	ANK3	ANK1	BICD2	BICD2	APCS
ATG2A	ASPSCR1	ANKFY1	ANK3	BID	BID	APEH
ATG3	ATAD1	ANKH	ANKFY1	BIN1	BIN1	APEX1
ATG4B	ATAD2	ANKHD1	ANKH	BIN2	BIN2	API5
ATG5	ATAD3A	ANKIB1	ANKHD1	BLMH	BLMH	APIP
ATG7	ATAD3B	ANKLE2	ANKHD1	BLOC1S1	BLOC1S1	APMAP
ATIC	ATE1	ANKMY2	ANKHD1	BLOC1S2	BLOC1S2	APOA1
ATL3	ATF2	ANKRD10	ANKIB1	BLOC1S3	BLOC1S3	APOA2
ATM	ATG16L1	ANKRD11	ANKLE2	BLOC1S4	BLOC1S4	APOA4
ATOX1	ATG2A	ANKRD12	ANKMY2	BLOC1S5	BLOC1S5	APOB
ATP11B	ATG3	ANKRD13A	ANKRD10	BLVRA	BLVRA	APOBEC3C
ATP13A1	ATG4B	ANKRD13D	ANKRD11	BLVRB	BLVRB	APOBEC3D
ATP1A1	ATG5	ANKRD16	ANKRD12	BOLA2	BOLA2	APOBEC3F
ATP1B3	ATG7	ANKRD17	ANKRD13A	BORCS5	BORCS5	APOBEC3G
ATP2A2	ATIC	ANKRD22	ANKRD13D	BORCS6	BORCS6	APOBR
ATP2A3	ATL3	ANKRD26	ANKRD17	BPGM	BPGM	APOC1
ATP2B1	ATM	ANKRD27	ANKRD27	BPNT1	BPNT1	APOC2
ATP2B4	ATOX1	ANKRD28	ANKRD28	BPNT2	BPNT2	APOC3
ATP5F1A	ATP11B	ANKRD33B	ANKRD33B	BRAP	BRAP	APOC4
ATP5F1B	ATP13A1	ANKRD44	ANKRD39	BRCC3	BRCC3	APOD
ATP5F1C	ATP1A1	ANKRD52	ANKRD44	BRD8	BRD8	APOE
ATP5F1D	ATP1B3	ANKRD54	ANKRD49	BSDC1	BSDC1	APOF
ATP5F1E	ATP2A2	ANKS1A	ANKRD52	BSG	BSG	APOH
ATP5IF1	ATP2A3	ANKZF1	ANKRD54	BST1	BST1	APOL1
ATP5MD	ATP2B4	ANLN	ANKS1A	BTAF1	BTAF1	APOL2
ATP5ME	ATP5F1A	ANO10	ANKZF1	BTF3	BTF3	APOL3
ATP5MF	ATP5F1B	ANO6	ANLN	BTF3L4	BTF3L4	APOL5
ATP5MG	ATP5F1C	ANO9	ANO10	BTK	BTK	APOM
ATP5MPL	ATP5F1D	ANP32A	ANO6	BTLA	BTLA	APOO
ATP5PB	ATP5F1E	ANP32B	ANP32A	BTN3A2	BTN3A2	APOOL
ATP5PD	ATP5IF1	ANP32E	ANP32B	BTN3A3	BTN3A3	APP
ATP5PF	ATP5MD	ANP32E	ANP32E	BUB3	BUB3	APPL1
ATP5PO	ATP5ME	ANPEP	ANPEP	BUD23	BUD23	APRT
ATP6AP1	ATP5MF	ANTXR2	ANTXR2	BUD31	BUD31	APTX
ATP6V0C	ATP5MG	ANXA1	ANXA1	BYSL	BYSL	AQR
ATP6V0D1	ATP5PB	ANXA11	ANXA11	BZW1	BZW1	ARAF
ATP6V1A	ATP5PD	ANXA2	ANXA2	BZW2	BZW2	ARAP1
ATP6V1B2	ATP5PF	ANXA3	ANXA3	C11orf54	C11orf54	ARAP2
ATP6V1C1	ATP5PO	ANXA4	ANXA4	C11orf68	C11orf68	ARAP3
ATP6V1D	ATP6AP1	ANXA5	ANXA5	C12orf57	C12orf57	ARCN1
ATP6V1E1	ATP6V0A2	ANXA6	ANXA6	C17orf49	C17orf49	ARF1
ATP6V1F	ATP6V0C	ANXA6	ANXA6	C17orf75	C17orf75	ARF4
ATP6V1G1	ATP6V0D1	ANXA7	ANXA7	C1QBP	C1QBP	ARF5
ATP6V1H	ATP6V1A	ANXA8	AOAH	C1QTNF3	C1QTNF3	ARF6
ATRX	ATP6V1B2	AOAH	AP1B1	C20orf27	C20orf27	ARFGAP1
ATXN10	ATP6V1C1	AP1B1	AP1B1	C2CD5	C2CD5	ARFGAP2
ATXN2	ATP6V1D	AP1B1	AP1G1	C5orf22	C5orf22	ARFGAP3
ATXN2L	ATP6V1E1	AP1G1	AP1G2	C5orf51	C5orf51	ARFGEF1
ATXN3	ATP6V1F	AP1G2	AP1M1	C8B	C8B	ARFGEF2
AUH	ATP6V1G1	AP1M1	AP1S1	C9orf64	C9orf64	ARFGEF3
AUP1	ATP6V1H	AP1S1	AP1S2	C9orf78	C9orf78	ARFIP1
AZGP1	ATRX	AP1S2	AP1S3	CA2	CA2	ARFIP2
AZU1	ATXN10	AP2A1	AP2A1	CA5B	CA5B	ARFRP1
B2M	ATXN2	AP2A2	AP2A2	CAB39	CAB39	ARG1
B3GAT3	ATXN2L	AP2B1	AP2A2	CACYBP	CACYBP	ARGLU1
BABAM1	ATXN3	AP2M1	AP2B1	CAD	CAD	ARHGAP1
BABAM2	AUP1	AP2S1	AP2B1	CALCOCO2	CALCOCO2	ARHGAP15
BACH2	AURKA	AP3B1	AP2M1	CALD1	CALD1	ARHGAP17
BAG1	AURKB	AP3D1	AP2S1	CALM1	CALM1	ARHGAP18
BAG2	AZGP1	AP3M1	AP3B1	CALML5	CALML5	ARHGAP24
BAG3	B2M	AP3M2	AP3D1	CALR	CALR	ARHGAP25
BAG5	B3GAT3	AP3S1	AP3M1	CALU	CALU	ARHGAP25
BAG6	BABAM1	AP4B1	AP3M2	CAMK1	CAMK1	ARHGAP26
BAK1	BABAM2	AP4E1	AP3S1	CAMK1D	CAMK1D	ARHGAP27
BANF1	BACH2	AP4M1	AP4B1	CAMK2D	CAMK2D	ARHGAP30
BAP18	BAG1	AP4S1	AP4E1	CAMK2G	CAMK2G	ARHGAP32
BASP1	BAG2	AP5B1	AP4M1	CAMK4	CAMK4	ARHGAP4
BAX	BAG3	AP5M1	AP4S1	CAND1	CAND1	ARHGAP45
BAZ1A	BAG5	AP5S1	AP5B1	CANX	CANX	ARHGAP5
BAZ1B	BAG6	AP5Z1	AP5M1	CAP1	CAP1	ARHGAP9
BCAP29	BAK1	APAF1	AP5S1	CAPG	CAPG	ARHGDIA
BCAP31	BANF1	APBA2	AP5Z1	CAPN1	CAPN1	ARHGDIB
BCAS2	BAP18	APBB1	APAF1	CAPN2	CAPN2	ARHGEF1
BCAS3	BASP1	APBB1IP	APBA2	CAPN7	CAPN7	ARHGEF1
BCAT2	BATF	APCS	APBB1	CAPNS1	CAPNS1	ARHGEF10L
BCCIP	BATF3	APEH	APBB1IP	CAPRIN1	CAPRIN1	ARHGEF11
BCKDHA	BAX	APEX1	APCS	CAPZA1	CAPZA1	ARHGEF16
BCKDHB	BAZ1A	APH1A	APEH	CAPZA2	CAPZA2	ARHGEF17
BCL10	BAZ1B	API5	APEX1	CAPZB	CAPZB	ARHGEF18
BCL11B	BCAP29	APIP	APH1B	CARD11	CARD11	ARHGEF2
BCL2	BCAP31	APLF	API5	CARD8	CARD8	ARHGEF5
BCL2L13	BCAS2	APLP2	API5	CARHSP1	CARHSP1	ARHGEF6
BCL7C	BCAT2	APMAP	APIP	CARM1	CARM1	ARHGEF7
BCL9	BCCIP	APOA1	CENPS	CARMIL2	CARMIL2	ARID1A
BCL9L	BCKDHA	NAXE	APLF	CARS1	CARS1	ARID1B
BCLAF1	BCKDHB	APOA2	APLP2	CARS2	CARS2	ARID2
BCR	BCL10	APOA4	APMAP	CASP1	CASP1	ARID3B
BCS1L	BCL11B	APOA5	APOA1	CASP10	CASP10	ARID4A
BDH1	BCL2	APOB	NAXE	CASP3	CASP3	ARID4B
BDH2	BCL2L13	APOBEC3A	APOA2	CASP4	CASP4	ARID5B
BECN1	BCL3	APOBEC3B	APOA4	CASP6	CASP6	ARIH1
BET1L	BCL7C	APOBEC3C	APOA5	CASP7	CASP7	ARIH2
BICD2	BCL9L	APOBEC3D	APOB	CASP8	CASP8	ARL1
BID	BCLAF1	APOBEC3F	APOBEC3B	CAST	CAST	ARL14EP
BIN1	BCR	APOBEC3G	APOBEC3C	CAT	CAT	ARL2
BIN2	BCS1L	APOBR	APOBEC3D	CAVIN2	CAVIN2	ARL2BP
BIRC6	BDH1	APOC1	APOBEC3F	CBFB	CBFB	ARL3
BLM	BDH2	APOC3	APOBEC3G	CBL	CBL	ARL6IP1
BLMH	BECN1	APOC4	APOBEC3H	CBLB	CBLB	ARL6IP4
BLOC1S1	BET1L	APOC4-APOC2	APOBR	CBR1	CBR1	ARL6IP5
BLOC1S2	BICD2	APOD	APOC1	CBR3	CBR3	ARL6IP6
BLOC1S3	BID	APOE	APOC3	CBR4	CBR4	ARL8A
BLOC1S4	BIN1	APOF	APOC4	CBX1	CBX1	ARL8B
BLOC1S5	BIN2	APOH	APOC4-APOC2	CBX3	CBX3	ARMC1
BLOC1S6	BIRC5	APOL1	APOD	CBX5	CBX5	ARMC10
BLVRA	BIRC6	APOL2	APOE	CC2D1A	CC2D1A	ARMC6
BLVRB	BLM	APOL3	APOF	CC2D1B	CC2D1B	ARMC8
BMS1	BLMH	APOM	APOH	CCAR2	CCAR2	ARMC9
BNIP1	BLOC1S1	APOO	APOL1	CCDC12	CCDC12	ARMCX3
BNIP3L	BLOC1S2	APOOL	APOL2	CCDC124	CCDC124	ARMH3
BOD1L1	BLOC1S3	APP	APOL3	CCDC22	CCDC22	ARMT1
BOLA1	BLOC1S4	APPL1	APOM	CCDC25	CCDC25	ARNT
BOLA2B	BLOC1S5	APPL2	APOO	CCDC43	CCDC43	ARPC1A
BOP1	BLOC1S6	APRT	APOOL	CCDC47	CCDC47	ARPC1B
BORCS5	BLVRA	APTX	APP	CCDC50	CCDC50	ARPC2
BORCS6	BLVRB	AQR	APPBP2	CCDC58	CCDC58	ARPC3
BORCS7	BMS1	ARAF	APPL1	CCDC6	CCDC6	ARPC4
BORCS8	BNIP1	ARAP1	APPL2	CCDC88A	CCDC88A	ARPC5
BPGM	BOD1L1	ARAP2	APRT	CCDC88B	CCDC88B	ARPC5L
BPHL	BOLA1	ARCN1	APTX	CCDC9	CCDC9	ARPP19
BPI	BOLA2B	AREL1	AQR	CCDC90B	CCDC90B	ARRB1
BPNT1	BOP1	ARF1	ARAF	CCDC91	CCDC91	ARRB2
BPTF	BORCS5	ARF4	ARAP1	CCDC93	CCDC93	ARRDC1
BRAT1	BORCS6	ARF5	ARAP2	CCDC97	CCDC97	ARSA
BRCC3	BORCS7	ARF6	ARCN1	CCM2	CCM2	ART4
BRD1	BPGM	ARFGAP1	ARF1	CCNDBP1	CCNDBP1	ARV1
BRD2	BPHL	ARFGAP2	ARF4	CCS	CCS	ASAH1
BRD3	BPNT1	ARFGAP3	ARF5	CCT2	CCT2	ASAP1
BRD4	BPTF	ARFGEF1	ARF6	CCT3	CCT3	ASAP2
BRD9	BRAT1	ARFGEF2	ARFGAP1	CCT4	CCT4	ASCC1
BRIX1	BRCC3	ARFIP1	ARFGAP2	CCT5	CCT5	ASCC2
BRK1	BRD1	ARFIP2	ARFGAP3	CCT6A	CCT6A	ASCC3
BRMS1	BRD2	ARFRP1	ARFGEF1	CCT7	CCT7	ASF1A
BROX	BRD3	ARG1	ARFGEF2	CCT8	CCT8	ASF1B
BRPF1	BRD4	ARG2	ARFIP1	CCZ1	CCZ1	ASH2L
BSDC1	BRIX1	ARGLU1	ARFIP1	CD14	CD14	ASL
BSG	BRK1	ARHGAP1	ARFIP2	CD163	CD163	ASMTL
BST2	BRMS1	ARHGAP10	ARFRP1	CD2	CD2	ASNS
BTAF1	BROX	ARHGAP12	ARG1	CD247	CD247	ASPH
BTF3	BRPF1	ARHGAP15	ARG2	CD27	CD27	ASPM
BTF3L4	BSDC1	ARHGAP17	ARGLU1	CD274	CD274	ASPSCR1
BTG1	BSG	ARHGAP17	ARHGAP1	CD2AP	CD2AP	ASTE1
BTN3A3	BST2	ARHGAP18	ARHGAP10	CD2BP2	CD2BP2	ASTN2
BUB3	BTAF1	ARHGAP21	ARHGAP11A	CD300A	CD300A	ASZ1
BUD13	BTF3	ARHGAP25	ARHGAP15	CD320	CD320	ATAD1
BUD23	BTF3L4	ARHGAP25	ARHGAP17	CD33	CD33	ATAD2
BUD31	BTN3A3	ARHGAP25	ARHGAP18	CD36	CD36	ATAD2B
BYSL	BUB3	ARHGAP26	ARHGAP19	CD38	CD38	ATAD3A
BZW1	BUD13	ARHGAP27	ARHGAP21	CD3D	CD3D	ATE1
BZW2	BUD23	ARHGAP27	ARHGAP22	CD3E	CD3E	ATF1
C11orf54	BUD31	ARHGAP30	ARHGAP24	CD3G	CD3G	ATF2
C11orf68	BYSL	ARHGAP31	ARHGAP25	CD4	CD4	ATF7
C11orf98	BZW1	ARHGAP35	ARHGAP25	CD40LG	CD40LG	ATF7IP
C12orf10	BZW2	ARHGAP4	ARHGAP25	CD44	CD44	ATF7IP2
C12orf57	C11orf54	ARHGAP5	ARHGAP26	CD47	CD47	ATG12
C15orf40	C11orf68	ARHGAP6	ARHGAP27	CD48	CD48	ATG13
C16orf54	C11orf98	ARHGAP9	ARHGAP27	CD5	CD5	ATG14
C16orf58	C12orf10	ARHGDIA	ARHGAP30	CD6	CD6	ATG16L1
C17orf75	C12orf57	ARHGDIB	ARHGAP31	CD69	CD69	ATG2A
C19orf25	C15orf40	ARHGDIB	ARHGAP35	CD7	CD7	ATG2B
C19orf53	C16orf58	ARHGDIB	ARHGAP4	CD74	CD74	ATG3
C1orf174	C17orf75	ARHGEF1	ARHGAP5	CD82	CD82	ATG4B
C1orf50	C19orf25	ARHGEF10L	ARHGAP6	CD84	CD84	ATG5
C1QBP	C19orf53	ARHGEF11	ARHGAP9	CD8A	CD8A	ATG7
C20orf27	C1orf174	ARHGEF12	ARHGDIA	CD8B	CD8B	ATG9A
C2CD5	C1QBP	ARHGEF18	ARHGDIB	CD9	CD9	ATIC
C2orf49	C20orf27	ARHGEF18	ARHGEF1	CD99	CD99	ATL2
C3	C2CD5	ARHGEF2	ARHGEF10	CD99L2	CD99L2	ATL3
C4B_2	C2orf49	ARHGEF2	ARHGEF10L	CDA	CDA	ATM
C5orf22	C3	ARHGEF3	ARHGEF12	CDC123	CDC123	ATOX1
C5orf51	C3orf38	ARHGEF5	ARHGEF18	CDC16	CDC16	ATP11B
C6orf203	C4A	ARHGEF6	ARHGEF18	CDC37	CDC37	ATP13A1
C7orf50	C4B_2	ARHGEF7	ARHGEF2	CDC37L1	CDC37L1	ATP13A2
C8orf33	C4BPA	ARHGEF7	ARHGEF2	CDC42	CDC42	ATP1A1
C8orf82	C5orf22	ARID1A	ARHGEF40	CDIPT	CDIPT	ATP1B1
C9orf64	C5orf51	ARID1B	ARHGEF5	CDK17	CDK17	ATP1B3
C9orf78	C6orf203	ARID2	ARHGEF6	CDK3	CDK3	ATP2A2
CA5B	C7orf50	ARID3A	ARHGEF7	CDK4	CDK4	ATP2A3
CAB39	C8orf33	ARID3B	ARHGEF7	CDK5	CDK5	ATP2B1
CABLES2	C8orf82	ARID4A	ARID1A	CDK5RAP3	CDK5RAP3	ATP2B4
CACTIN	C9orf64	ARID4B	ARID1B	CDK6	CDK6	ATP2C2
CACYBP	C9orf78	ARID5A	ARID2	CDKN1B	CDKN1B	ATP4B
CAD	CA5B	ARID5B	ARID3A	CDKN2AIP	CDKN2AIP	ATP5F1A
CALM3	CAB39	ARIH1	ARID3B	CDS2	CDS2	ATP5F1B
CALR	CABLES2	ARIH2	ARID4A	CDV3	CDV3	ATP5F1C
CALU	CACTIN	ARL1	ARID4B	CELF1	CELF1	ATP5F1D
CAMK1D	CACYBP	ARL14EP	ARID5B	CELF2	CELF2	ATP5F1E
CAMK2D	CAD	ARL15	ARIH1	CEMIP2	CEMIP2	ATP5IF1
CAMK2G	CALCOCO2	ARL2	ARIH2	CEP170	CEP170	ATP5MC3
CAMK4	CALM3	ARL2BP	ARL1	CERT1	CERT1	ATP5MD
CAMP	CALR	ARL3	ARL11	CES1	CES1	ATP5ME
CAND1	CALU	ARL4C	ARL14EP	CFAP298	CFAP298	ATP5MF
CANX	CAMK1D	ARL5A	ARL15	CFAP36	CFAP36	ATP5MF
CAP1	CAMK2D	ARL6	ARL2	CFL1	CFL1	ATP5MG
CAPG	CAMK2G	ARL6IP4	ARL2BP	CHCHD2	CHCHD2	ATP5MPL
CAPN1	CAMK4	ARL6IP5	ARL3	CHCHD3	CHCHD3	ATP5PB
CAPN2	CAND1	ARL6IP6	ARL4C	CHEK1	CHEK1	ATP5PD
CAPN7	CANX	ARL8A	ARL5A	CHID1	CHID1	ATP5PF
CAPNS1	CAP1	ARL8B	ARL5B	CHM	CHM	ATP5PO
CAPRIN1	CAPG	ARMC1	ARL6	CHMP1A	CHMP1A	ATP6AP1
CAPZA1	CAPN1	ARMC10	ARL6IP4	CHMP1B	CHMP1B	ATP6AP2
CAPZA2	CAPN2	ARMC6	ARL6IP5	CHMP2A	CHMP2A	ATP6V0A2
CAPZB	CAPN7	ARMC8	ARL6IP6	CHMP2B	CHMP2B	ATP6V0C
CARD11	CAPNS1	ARMCX1	ARL8A	CHMP3	CHMP3	ATP6V0D1
CARD16	CAPRIN1	ARMCX2	ARL8B	CHMP4A	CHMP4A	ATP6V1A
CARD19	CAPZA1	ARMCX3	ARMC1	CHMP4B	CHMP4B	ATP6V1B2
CARD8	CAPZA2	ARNT	ARMC10	CHMP5	CHMP5	ATP6V1C1
CARHSP1	CAPZB	ARPC1A	ARMC6	CHMP6	CHMP6	ATP6V1D
CARM1	CARD11	ARPC1B	ARMC8	CHMP7	CHMP7	ATP6V1E1
CARMIL2	CARD16	ARPC2	ARMCX1	CHORDC1	CHORDC1	ATP6V1F
CARS	CARD19	ARPC3	ARMCX2	CHP1	CHP1	ATP6V1G1
CARS2	CARD8	ARPC4	ARMCX3	CHUK	CHUK	ATP6V1H
CASP1	CARHSP1	ARPC5	ARNT	CIAO1	CIAO1	ATP8A1
CASP10	CARM1	ARPC5L	ARPC1A	CIAO2A	CIAO2A	ATP8A2
CASP14	CARMIL2	ARPP19	ARPC1B	CIAO2B	CIAO2B	ATPAF1
CASP2	CARS	ARR3	ARPC2	CIAPIN1	CIAPIN1	ATPAF2
CASP3	CARS2	ARRB1	ARPC3	CIRBP	CIRBP	ATR
CASP4	CASP1	ARRB1	ARPC4	CISD1	CISD1	ATRIP
CASP6	CASP10	ARRB2	ARPC5	CISD2	CISD2	ATRIP
CASP7	CASP2	ARRDC1	ARPC5L	CKAP4	CKAP4	ATRN
CASP8	CASP3	ARSA	ARPIN	CKAP5	CKAP5	ATRX
CAST	CASP4	ARSB	ARPP19	CLEC2B	CLEC2B	ATXN1
CAT	CASP6	ARSD	ARR3	CLIC1	CLIC1	ATXN10
CBFB	CASP7	ASAH1	ARRB1	CLIC3	CLIC3	ATXN1L
CBL	CASP8	ASAP1	ARRB2	CLIC4	CLIC4	ATXN2
CBLB	CAST	ASAP2	ARRDC1	CLINT1	CLINT1	ATXN2L
CBLL1	CAT	ASB6	ARSA	CLIP1	CLIP1	ATXN3
CBR1	CBFB	ASCC1	ARSB	CLNS1A	CLNS1A	ATXN7
CBR3	CBL	ASCC2	ARSD	CLPB	CLPB	ATXN7L3
CBR4	CBLB	ASCC3	ARSK	CLPP	CLPP	ATXN7L3B
CBX1	CBLL1	ASF1A	ASAH1	CLPTM1L	CLPTM1L	AUH
CBX3	CBR1	ASF1B	ASAP1	CLPX	CLPX	AUP1
CBX5	CBR3	ASH2L	ASAP2	CLTA	CLTA	AUTS2
CC2D1A	CBR4	ASL	ASB2	CLTB	CLTB	AVEN
CC2D1B	CBX1	ASMTL	ASB6	CLTC	CLTC	AVL9
CCAR1	CBX3	GET3	ASCC1	CLU	CLU	AZGP1
CCAR2	CBX5	ASNS	ASCC2	CLUH	CLUH	AZI2
CCDC115	CC2D1A	ASNSD1	ASCC3	CLYBL	CLYBL	AZU1
CCDC12	CC2D1B	ASPH	ASF1A	CMAS	CMAS	B3GALT1
CCDC124	CCAR1	ASPHD2	ASF1B	CMPK1	CMPK1	B3GALT2
CCDC127	CCAR2	ASPM	ASH2L	CMPK2	CMPK2	B3GALT6
CCDC134	CCDC115	ASPSCR1	ASL	CNBP	CNBP	B3GAT3
CCDC137	CCDC12	ASTE1	ASMTL	CNDP2	CNDP2	B3GLCT
CCDC186	CCDC124	INTS13	GET3	CNN2	CNN2	B4GALNT4
CCDC22	CCDC134	ASXL2	ASNS	CNOT1	CNOT1	B4GALT5
CCDC25	CCDC137	ATAD1	ASNSD1	CNOT2	CNOT2	BABAM1
CCDC28A	CCDC186	ATAD2	ASPH	CNOT3	CNOT3	BABAM2
CCDC43	CCDC22	ATAD2B	ASPHD2	CNP	CNP	BACH1
CCDC47	CCDC25	ATAD3A	ASPM	CNPY2	CNPY2	BACH2
CCDC51	CCDC43	ATAD3B	ASPRV1	CNPY3	CNPY3	BAD
CCDC58	CCDC47	ATAD5	ASPSCR1	CNPY4	CNPY4	BAG1
CCDC59	CCDC51	ATE1	ASRGL1	COA3	COA3	BAG2
CCDC6	CCDC58	ATF1	ASTE1	COA4	COA4	BAG3
CCDC86	CCDC59	ATF2	INTS13	COASY	COASY	BAG4
CCDC88B	CCDC6	ATF2	ASXL2	COG2	COG2	BAG5
CCDC9	CCDC61	ATF7	ATAD1	COG3	COG3	BAG6
CCDC90B	CCDC86	ATF7IP	ATAD2	COG4	COG4	BAK1
CCDC91	CCDC88B	ATF7IP2	ATAD2B	COG6	COG6	BANF1
CCDC93	CCDC9	ATG101	ATAD3A	COG7	COG7	BANP
CCDC97	CCDC91	ATG12	ATAD3B	COL1A1	COL1A1	BAP1
CCM2	CCDC93	ATG13	ATAD5	COL1A2	COL1A2	BARD1
CCNH	CCDC97	ATG14	ATAT1	COL2A1	COL2A1	BASP1
CCNK	CCM2	ATG16L1	ATE1	COL6A1	COL6A1	BAX
CCNL1	CCNA2	ATG16L2	ATF1	COLGALT1	COLGALT1	BAZ1A
CCNT1	CCNB1	ATG2A	ATF2	COMMD10	COMMD10	BAZ1B
CCNY	CCNH	ATG2B	ATF2	COMMD2	COMMD2	BAZ2A
CCR7	CCNK	ATG3	ATF3	COMMD3	COMMD3	BBC3
CCS	CCNL1	ATG4A	ATF6B	COMMD8	COMMD8	BBS2
CCT2	CCNL2	ATG4B	ATF7	COMMD9	COMMD9	BBS7
CCT3	CCNT1	ATG4C	ATF7IP	COMT	COMT	BBS9
CCT4	CCR7	ATG5	ATG101	COPA	COPA	BBX
CCT5	CCS	ATG7	ATG12	COPB1	COPB1	BCAP29
CCT6A	CCT2	ATG9A	ATG13	COPB2	COPB2	BCAP31
CCT7	CCT3	PGGHG	ATG14	COPE	COPE	BCAS2
CCT8	CCT4	ATIC	ATG16L1	COPG1	COPG1	BCAS3
CCZ1B	CCT5	ATL1	ATG16L2	COPG2	COPG2	BCAT2
CD101	CCT6A	ATL2	ATG2A	COPS2	COPS2	BCCIP
CD2	CCT7	ATL3	ATG2B	COPS3	COPS3	BCHE
CD226	CCT8	ATL3	ATG3	COPS4	COPS4	BCKDHA
CD247	CCZ1B	ATM	ATG4A	COPS5	COPS5	BCKDHB
CD27	CD2	ATN1	ATG4B	COPS6	COPS6	BCKDK
CD28	CD226	ATOX1	ATG4C	COPS7A	COPS7A	BCL10
CD2AP	CD247	ATP10D	ATG5	COPS7B	COPS7B	BCL11B
CD2BP2	CD27	ATP11A	ATG7	COPS8	COPS8	BCL2
CD300A	CD28	ATP11B	ATG9A	COPZ1	COPZ1	BCL2L1
CD37	CD2AP	ATP11C	PGGHG	COQ8A	COQ8A	BCL2L13
CD38	CD2BP2	ATP13A1	ATIC	COQ9	COQ9	BCL7B
CD3D	CD37	ATP13A2	ATL1	CORO1A	CORO1A	BCL7C
CD3E	CD38	ATP1A1	ATL2	CORO1B	CORO1B	BCL9
CD3EAP	CD3D	ATP1A2	ATL3	CORO1C	CORO1C	BCL9L
CD3G	CD3E	ATP1B3	ATM	CORO7	CORO7	BCLAF1
CD4	CD3EAP	ATP2A2	ATN1	COTL1	COTL1	BCR
CD44	CD3G	ATP2A3	ATOX1	COX20	COX20	BCS1L
CD46	CD4	ATP2B1	ATP10D	COX4I1	COX4I1	BDH1
CD47	CD40LG	ATP2B3	ATP11A	COX5A	COX5A	BDH2
CD48	CD44	ATP2B4	ATP11B	COX5B	COX5B	BECN1
CD5	CD46	ATP2C1	ATP11C	COX6B1	COX6B1	BET1
CD55	CD47	ATP5F1A	ATP13A1	COX6C	COX6C	BICD1
CD58	CD48	ATP5F1B	ATP13A2	COX7A2	COX7A2	BICD2
CD59	CD5	ATP5F1C	ATP13A3	CPD	CPD	BICRA
CD6	CD55	ATP5F1D	ATP1A1	CPNE1	CPNE1	BIN1
CD63	CD58	ATP5PB	ATP1A2	CPNE2	CPNE2	BIN2
CD7	CD59	ATP5PD	ATP1B1	CPNE3	CPNE3	BIRC2
CD74	CD6	ATP5ME	ATP1B3	CPOX	CPOX	BIRC6
CD81	CD63	ATP5PF	ATP2A2	CPPED1	CPPED1	BLM
CD82	CD69	ATP5MF	ATP2A3	CPSF3	CPSF3	BLMH
CD84	CD7	ATP5MF-PTCD1	ATP2B1	CPSF6	CPSF6	BLOC1S1
CD96	CD70	ATP5MG	ATP2B3	CPSF7	CPSF7	BLOC1S2
CD97	CD74	ATP5PO	ATP2B4	CPT1A	CPT1A	BLOC1S3
CD99	CD81	DMAC2L	ATP2C1	CPT2	CPT2	BLVRA
CDC16	CD82	DMAC2	ATP5F1A	CPVL	CPVL	BLVRB
CDC23	CD84	ATP6AP1	ATP5F1B	CR1	CR1	BMERB1
CDC27	CD97	ATP6AP2	ATP5F1B	CRAT	CRAT	BMS1
CDC37	CD99	ATP6V0A1	ATP5F1C	CREB1	CREB1	BNC1
CDC40	CDC123	ATP6V0A2	ATP5F1D	CRELD2	CRELD2	BNIP1
CDC42	CDC16	ATP6V0C	ATP5PB	CRK	CRK	BNIP2
CDC42SE2	CDC20	ATP6V0D1	ATP5MC2	CRKL	CRKL	BOD1
CDC5L	CDC23	ATP6V0D2	ATP5PD	CRLF3	CRLF3	BOD1L1
CDC73	CDC27	ATP6V1A	ATP5ME	CROCC	CROCC	BOLA1
CDIPT	CDC37	ATP6V1B2	ATP5PF	CRTAM	CRTAM	BOLA2B
CDK1	CDC40	ATP6V1C1	ATP5MF	CRTAP	CRTAP	BOLA3
CDK11B	CDC42	ATP6V1D	ATP5MF-PTCD1	CRYBG1	CRYBG1	BOP1
CDK12	CDC42SE2	ATP6V1E1	ATP5MG	CRYL1	CRYL1	BORCS5
CDK13	CDC45	ATP6V1F	ATP5PO	CRYZ	CRYZ	BORCS6
CDK2	CDC5L	ATP6V1G1	DMAC2L	CRYZL1	CRYZL1	BORCS7
CDK4	CDC73	ATP6V1H	DMAC2	CS	CS	BORCS8
CDK5	CDCA5	ATP7A	ATP6AP1	CSDE1	CSDE1	BPGM
CDK5RAP1	CDIPT	ATP8A1	ATP6AP2	CSE1L	CSE1L	BPHL
CDK5RAP3	CDK1	ATP8B2	ATP6V0A1	CSK	CSK	BPIFA2
CDK6	CDK11B	ATP8B4	ATP6V0A2	CSNK2A2	CSNK2A2	BPNT1
CDK7	CDK12	ATPAF1	ATP6V0C	CSNK2A3	CSNK2A3	BPTF
CDK9	CDK2	ATPAF2	ATP6V0D1	CSNK2B	CSNK2B	BRAF
CDKN1B	CDK4	ATP5IF1	ATP6V0D2	CSRP1	CSRP1	BRAP
CDKN2AIP	CDK5	ATR	ATP6V1A	CSTA	CSTA	BRAT1
CDR2	CDK5RAP1	ATRIP	ATP6V1B2	CSTB	CSTB	BRCC3
CDS2	CDK5RAP3	ATRX	ATP6V1C1	CSTF1	CSTF1	BRD1
CDV3	CDK6	ATXN10	ATP6V1D	CSTF2	CSTF2	BRD2
CDYL	CDK7	ATXN1L	ATP6V1E1	CSTF2T	CSTF2T	BRD3
CEBPG	CDK9	ATXN2	ATP6V1E2	CTBP1	CTBP1	BRD4
CEBPZ	CDKAL1	ATXN2L	ATP6V1F	CTBP2	CTBP2	BRD7
CELF1	CDKN1B	ATXN3	ATP6V1G1	CTBS	CTBS	BRD8
CELF2	CDKN2AIP	ATXN7	ATP6V1H	CTDP1	CTDP1	BRD9
CEMIP2	CDS2	ATXN7L3B	ATP7A	CTNNA1	CTNNA1	BRF1
CENPA	CDV3	AUH	ATP8A1	CTNNBL1	CTNNBL1	BRI3BP
CENPB	CDYL	AUP1	ATP8B2	CTPS1	CTPS1	BRIX1
CENPC	CEACAM1	AURKA	ATP9A	CTPS2	CTPS2	BRK1
CENPV	CEBPZ	AURKAIP1	ATPAF1	CTSA	CTSA	BRMS1
CEP120	CELF1	AUTS2	ATPAF2	CTSB	CTSB	BRMS1L
CEP128	CELF2	AVEN	ATP5IF1	CTSC	CTSC	BROX
CEP135	CEMIP2	AVL9	ATR	CTSD	CTSD	BRPF1
CEP170	CENPA	AZGP1	ATRIP	CTSG	CTSG	BRSK2
CEP250	CENPB	AZI2	ATRN	CTSH	CTSH	BSDC1
CEP41	CENPC	AZU1	ATRX	CTSL	CTSL	BSG
CERS2	CENPV	AZU1	ATXN1	CTSS	CTSS	BST2
CETN2	CEP120	B2M	ATXN10	CTSZ	CTSZ	BSX
CETN3	CEP135	B3GALT6	ATXN1L	CTTN	CTTN	BTAF1
CFAP20	CEP170	B3GLCT	ATXN2	CUL1	CUL1	BTBD1
CFAP298	CEP250	B3GAT3	ATXN2L	CUL2	CUL2	BTBD11
CFAP36	CEP41	B4GAT1	ATXN3	CUL3	CUL3	BTD
CFDP1	CERS2	B3GNT2	ATXN7	CUL4A	CUL4A	BTF3
CFL1	CETN2	B4GALT1	ATXN7L3B	CUL4B	CUL4B	BTF3
CGAS	CETN3	B4GALT3	AUH	CUL5	CUL5	BTF3L4
CGGBP1	CFAP20	B4GALT4	AUP1	CUTA	CUTA	BTG1
CHAMP1	CFAP298	B4GALT5	AURKA	CUTC	CUTC	BTG3
CHCHD2	CFAP36	B4GALT7	AURKAIP1	CWC27	CWC27	BTLA
CHCHD3	CFDP1	BABAM1	AURKB	CWF19L1	CWF19L1	BTN1A1
CHCHD4	CFL1	BACH1	AUTS2	CXCR4	CXCR4	BTN3A1
CHCHD5	CFL2	BACH2	AVEN	CXorf38	CXorf38	BTN3A2
CHCHD6	CGAS	BAD	AVL9	CYB5A	CYB5A	BTN3A3
CHCHD7	CGGBP1	BAG1	AZGP1	CYB5B	CYB5B	BUB3
CHD1	CHAF1B	BAG2	AZI2	CYB5R1	CYB5R1	BUD13
CHD1L	CHAMP1	BAG3	AZU1	CYB5R3	CYB5R3	BUD23
CHD2	CHCHD1	BAG3	AZU1	CYBA	CYBA	BUD31
CHD3	CHCHD2	BAG4	B2M	CYBB	CYBB	BYSL
CHD4	CHCHD3	BAG5	B2M	CYC1	CYC1	BZW1
CHD8	CHCHD4	BAG6	B3GALT6	CYCS	CYCS	BZW2
CHERP	CHCHD5	BAHD1	B3GLCT	CYFIP1	CYFIP1	C11orf54
CHID1	CHCHD6	BAIAP2	B3GAT3	CYFIP2	CYFIP2	C11orf58
CHKB	CHD1	BAK1	B4GAT1	CYLD	CYLD	C11orf68
CHM	CHD1L	BANF1	B3GNT2	CYP20A1	CYP20A1	C12orf10
CHMP1A	CHD2	BANK1	B4GALT1	CYRIB	CYRIB	C12orf4
CHMP1B	CHD3	BANP	B4GALT3	CYTH1	CYTH1	C12orf43
CHMP2A	CHD4	BAP1	B4GALT4	CYTH4	CYTH4	C12orf57
CHMP2B	CHD8	C17orf49	B4GALT5	CYTIP	CYTIP	C12orf65
CHMP4A	CHEK1	C17orf49	B4GALT7	CZIB	CZIB	C12orf75
CHMP4B	CHERP	BARD1	BABAM1	D2HGDH	D2HGDH	C14orf119
CHMP5	CHID1	BASP1	BACH1	DAP3	DAP3	C15orf40
CHMP6	CHKB	BATF3	BACH2	DARS1	DARS1	C15orf41
CHMP7	CHM	BAX	BAD	DARS2	DARS2	C15orf54
CHORDC1	CHMP1A	BAZ1A	BAG1	DAZAP1	DAZAP1	C16orf54
CHP1	CHMP1B	BAZ1B	BAG2	DBI	DBI	C16orf58
CHRAC1	CHMP2A	BAZ2A	BAG3	DBN1	DBN1	C16orf70
CHTOP	CHMP2B	BBC3	BAG3	DBNL	DBNL	C16orf87
CHUK	CHMP4A	BBX	BAG4	DBR1	DBR1	C17orf49
CHURC1	CHMP4B	BCAP29	BAG5	DBT	DBT	C17orf49
CIAO1	CHMP5	BCAP31	BAG6	DCAF13	DCAF13	C17orf75
CIAO2A	CHMP6	BCAS2	BAHD1	DCAF7	DCAF7	C18orf21
CIAO2B	CHMP7	BCAS3	BAIAP2	DCAF8	DCAF8	C18orf25
CIAO3	CHORDC1	BCAS4	BAIAP2L1	DCK	DCK	C18orf63
CIAPIN1	CHP1	BCAT1	BAK1	DCP1A	DCP1A	C19orf12
CIB1	CHRAC1	BCAT2	BANF1	DCP1B	DCP1B	C19orf25
CIC	CHTOP	BCCIP	BANK1	DCPS	DCPS	C19orf47
CINP	CHUK	BCCIP	BANP	DCTN1	DCTN1	C19orf53
CIRBP	CHURC1	BCHE	BAP1	DCTN2	DCTN2	C1D
CISD1	CIAO1	BCKDHA	C17orf49	DCTN3	DCTN3	C1GALT1
CISD2	CIAO2A	BCKDHB	C17orf49	DCTN4	DCTN4	C1orf109
CISD3	CIAO2B	BCKDK	BARD1	DCTN5	DCTN5	C1orf131
CIZ1	CIAO3	BCL10	BASP1	DCTPP1	DCTPP1	C1orf162
CKAP4	CIAPIN1	BCL11A	BATF	DCUN1D1	DCUN1D1	C1orf174
CKAP5	CIB1	BCL11B	BATF3	DCUN1D5	DCUN1D5	C1orf198
CLASP1	CIC	BCL2	BAX	DCXR	DCXR	C1orf35
CLASP2	CINP	BCL2L1	BAZ1A	DDAH2	DDAH2	C1orf50
CLASRP	CIRBP	BCL2L11	BAZ1B	DDB1	DDB1	C1orf52
CLC	CISD1	BCL2L12	BAZ2A	DDI2	DDI2	C1orf68
CLCC1	CISD2	BCL2L13	BAZ2B	DDOST	DDOST	C1QA
CLDND1	CISD3	BCL2L14	BBC3	DDRGK1	DDRGK1	C1QB
CLIC1	CISH	BCL2L15	BBX	DDT	DDT	C1QBP
CLIC2	CIZ1	BCL3	BCAP29	DDX1	DDX1	C1QC
CLIC5	CKAP4	BCL7A	BCAP31	DDX17	DDX17	C1QTNF9B
CLINT1	CKAP5	BCL7B	BCAR3	DDX19A	DDX19A	C1R
CLIP1	CKS2	BCL7C	BCAS2	DDX24	DDX24	C1RL
CLK3	CLASP1	BCL9	BCAS3	DDX28	DDX28	C1S
CLN6	CLASP2	BCL9L	BCAT1	DDX39A	DDX39A	C2
CLNS1A	CLASRP	BCLAF1	BCAT2	DDX39B	DDX39B	C20orf27
CLP1	CLC	BCOR	BCCIP	DDX3X	DDX3X	C2CD2L
CLPB	CLCC1	BCR	BCCIP	DDX41	DDX41	C2CD3
CLPP	CLDND1	BCS1L	BCKDHA	DDX42	DDX42	C2orf49
CLPTM1	CLEC16A	BDH1	BCKDHB	DDX5	DDX5	C2orf69
CLPTM1L	CLIC1	BDH2	BCKDK	DDX58	DDX58	C2orf76
CLPX	CLIC4	BECN1	BCL10	DDX6	DDX6	C3
CLTA	CLIC5	BEND3	BCL11A	DDX60	DDX60	C3orf38
CLTB	CLINT1	BET1	BCL11B	DECR1	DECR1	C4A
CLTC	CLIP1	BET1	BCL2	DEF6	DEF6	C4B
CLTCL1	CLK3	BET1L	BCL2A1	DEK	DEK	C4BPA
CLUH	CLN3	BHLHA15	BCL2L1	DENND10	DENND10	C4BPB
CLYBL	CLNS1A	BICD1	BCL2L11	DENND1C	DENND1C	C4orf17
CMAS	CLP1	BICD2	BCL2L12	DENND4C	DENND4C	C4orf3
CMC4	CLPB	BID	BCL2L13	DENR	DENR	C5
CMPK1	CLPP	BIN1	BCL2L14	DERA	DERA	C5orf22
CMPK2	CLPTM1	BIN2	BCL2L15	DESI1	DESI1	C5orf51
CMSS1	CLPTM1L	BIRC2	BCL3	DFFA	DFFA	C6
CMTM7	CLPX	BIRC3	BCL6	DGKA	DGKA	C6orf89
CMTM8	CLTA	BIRC5	BCL7A	DGKZ	DGKZ	C7
CMTR1	CLTB	BIRC6	BCL7B	DGLUCY	DGLUCY	C7orf25
CNBP	CLTC	BLK	BCL7C	DHODH	DHODH	C7orf26
CNDP2	CLU	BLM	BCL9	DHPS	DHPS	C7orf50
CNIH4	CLUH	BLMH	BCL9L	DHRS1	DHRS1	C8A
CNN2	CLYBL	BLNK	BCLAF1	DHRS4	DHRS4	C8B
CNNM3	CMAS	BLOC1S1	BCLAF1	DHRS7	DHRS7	C8G
CNOT1	CMPK1	BLOC1S2	BCOR	DHX15	DHX15	C8orf33
CNOT10	CMPK2	BLOC1S3	BCR	DHX30	DHX30	C8orf82
CNOT11	CMSS1	BLOC1S4	BCS1L	DHX36	DHX36	C9
CNOT2	CMTM7	BLOC1S5	BDH1	DHX38	DHX38	C9orf131
CNOT3	CMTR1	BLOC1S6	BDH2	DHX9	DHX9	C9orf50
CNOT6L	CNBP	BLVRA	BECN1	DIABLO	DIABLO	C9orf57
CNOT7	CNDP2	BLVRB	BEND5	DIAPH1	DIAPH1	C9orf64
CNOT9	CNIH4	BMP2K	BET1	DIAPH2	DIAPH2	C9orf78
CNP	CNN2	BMS1	BET1	DIS3	DIS3	CA3
CNPY2	CNNM3	BNIP1	BET1L	DIS3L	DIS3L	CA5B
CNPY3	CNOT1	BNIP2	BGN	DIS3L2	DIS3L2	CAAP1
CNPY4	CNOT10	BNIP3L	BHLHE40	DKC1	DKC1	CAB39
CNST	CNOT11	BOD1	BICD1	DLAT	DLAT	CAB39L
CNTRL	CNOT2	BOD1L1	BICD2	DLD	DLD	CABIN1
CNTROB	CNOT3	BOLA1	BID	DLG1	DLG1	CACNA1F
COA1	CNOT4	BOLA2	BIN1	DLGAP4	DLGAP4	CACNA2D4
COA3	CNOT6L	BOLA3	BIN2	DLST	DLST	CACNG6
COA4	CNOT7	BOP1	BIN3	DMBT1	DMBT1	CACTIN
COA5	CNOT9	BPGM	BIRC3	DNAJA1	DNAJA1	CACUL1
COA6	CNP	BPHL	BIRC5	DNAJA2	DNAJA2	CACYBP
COASY	CNPY2	BPI	BIRC6	DNAJA3	DNAJA3	CAD
COG1	CNPY3	BPIFA1	BLK	DNAJB1	DNAJB1	CAGE1
COG3	CNPY4	BPIFB1	BLM	DNAJB11	DNAJB11	CALCOCO1
COG4	CNST	BPNT1	BLMH	DNAJB12	DNAJB12	CALCOCO2
COG6	CNTRL	BPTF	BLNK	DNAJB14	DNAJB14	CALD1
COG7	COA3	BRAF	BLOC1S1	DNAJB2	DNAJB2	CALHM2
COG8	COA4	BRAF	BLOC1S2	DNAJB6	DNAJB6	CALM2
COIL	COA7	BRAP	BLOC1S3	DNAJC10	DNAJC10	CALML3
COL4A3BP	COASY	BRAT1	BLOC1S4	DNAJC13	DNAJC13	CALML5
COLGALT1	COG1	BRCA1	BLOC1S5	DNAJC17	DNAJC17	CALR
COMMD10	COG2	BRCC3	BLOC1S6	DNAJC2	DNAJC2	CALU
COMMD2	COG3	BRD1	BLVRA	DNAJC3	DNAJC3	CALU
COMMD3	COG4	BRD2	BLVRB	DNAJC7	DNAJC7	CAMK1D
COMMD4	COG6	BRD3	BMP2K	DNAJC8	DNAJC8	CAMK2D
COMMD5	COG7	BRD4	BMS1	DNAJC9	DNAJC9	CAMK2G
COMMD8	COG8	BRD7	BMX	DNLZ	DNLZ	CAMK4
COMMD9	COIL	BRD8	BNIP1	DNM1L	DNM1L	CAMKK1
COMT	COL4A3BP	BRD9	BNIP2	DNM2	DNM2	CAMLG
COMTD1	COLGALT1	BABAM2	BNIP3	DNPEP	DNPEP	CAMP
COPA	COMMD10	BRF1	BNIP3L	DNPH1	DNPH1	CAMSAP1
COPB1	COMMD2	BRI3	BOD1	DOCK10	DOCK10	CAMSAP2
COPB2	COMMD3	BRI3BP	BOD1L1	DOCK11	DOCK11	CAMTA1
COPE	COMMD4	BRIX1	BOLA1	DOCK2	DOCK2	CAND1
COPG1	COMMD5	BRK1	BOLA2	DOCK8	DOCK8	CAND2
COPG2	COMMD8	BRMS1	BOLA3	DOHH	DOHH	CANX
COPRS	COMMD9	BRMS1L	BOP1	DOK1	DOK1	CAP1
COPS2	COMT	BROX	BPGM	DOK2	DOK2	CAP2
COPS3	COPA	BRPF1	BPHL	DOK3	DOK3	CAPG
COPS4	COPB1	BSDC1	BPI	DPF2	DPF2	CAPN1
COPS5	COPB2	BSG	BPIFB1	DPH2	DPH2	CAPN2
COPS6	COPE	BSPRY	BPNT1	DPM1	DPM1	CAPN7
COPS7A	COPG1	BST1	BPTF	DPP3	DPP3	CAPNS1
COPS7B	COPG2	BST2	BRAF	DPP4	DPP4	CAPRIN1
COPS8	COPRS	BTAF1	BRAP	DPP7	DPP7	CAPS2
COPZ1	COPS2	BTBD11	BRAT1	DPP9	DPP9	CAPZA1
COQ5	COPS3	BTD	BRCA1	DPYD	DPYD	CAPZA2
COQ6	COPS4	BTF3	BRCC3	DPYSL2	DPYSL2	CAPZB
COQ7	COPS5	BTF3L4	BRD1	DR1	DR1	CARD11
COQ8A	COPS6	BTG1	BRD2	DRAP1	DRAP1	CARD14
COQ9	COPS7A	BTK	BRD3	DRG1	DRG1	CARD16
CORO1A	COPS7B	BTLA	BRD4	DRG2	DRG2	CARD19
CORO1B	COPS8	BTN2A1	BRD7	DSC1	DSC1	CARD8
CORO1C	COPZ1	BTN3A1	BRD8	DSG1	DSG1	CARHSP1
CORO2A	COQ5	BTN3A2	BRD9	DSP	DSP	CARM1
CORO7	COQ6	BTN3A3	BABAM2	DSTN	DSTN	CARMIL1
COTL1	COQ7	BUB3	BRF1	DTD1	DTD1	CARMIL2
COX17	COQ8A	BUD13	BRI3BP	DTNBP1	DTNBP1	CARNS1
COX20	COQ9	BUD31	BRIP1	DTX3L	DTX3L	CARS1
COX4I1	CORO1A	BYSL	BRIX1	DTYMK	DTYMK	CARS2
COX5A	CORO1B	BZW1	BRK1	DUS2	DUS2	CASC3
COX5B	CORO1C	BZW2	BRMS1	DUS3L	DUS3L	CASKIN2
COX6A1	CORO2A	LCOR	BRMS1L	DUSP1	DUSP1	CASP1
COX6B1	CORO7	BORCS7	BROX	DUSP12	DUSP12	CASP10
COX6C	COTL1	VSIR	BRPF1	DUSP3	DUSP3	CASP10
COX7A2	COX17	ARMH3	BSDC1	DUSP4	DUSP4	CASP14
COX7A2L	COX20	C11orf54	BSG	DUT	DUT	CASP2
COX7B	COX4I1	NKAPD1	BSPRY	DVL2	DVL2	CASP3
CPNE1	COX5A	C11orf68	BST1	DYNC1H1	DYNC1H1	CASP4
CPNE3	COX5B	HIKESHI	BST2	DYNC1I2	DYNC1I2	CASP6
CPOX	COX6A1	MYG1	BTAF1	DYNC1LI1	DYNC1LI1	CASP7
CPPED1	COX6B1	C12orf29	BTBD1	DYNC1LI2	DYNC1LI2	CASP8
CPSF1	COX6C	C12orf4	BTBD11	DYNC2H1	DYNC2H1	CASP9
CPSF2	COX7A2	C12orf43	BTD	DYNLL2	DYNLL2	CASQ2
CPSF3	COX7A2L	C12orf45	BTF3	DYNLRB1	DYNLRB1	CAST
CPSF4	COX7B	C12orf57	BTF3L4	DYSF	DYSF	CASTOR1
CPSF6	CPNE1	C12orf65	BTG1	E2F4	E2F4	CAVIN1
CPSF7	CPNE3	C12orf66	BTK	EBP	EBP	CAVIN2
CPT1A	CPOX	ERG28	BTLA	ECE1	ECE1	CBFA2T2
CPT2	CPPED1	GON7	BTN2A1	ECH1	ECH1	CBFB
CPTP	CPSF1	DGLUCY	BTN3A1	ECHDC1	ECHDC1	CBFB
CRAT	CPSF2	RTRAF	BTN3A3	ECHS1	ECHS1	CBL
CRBN	CPSF3	C15orf40	BUB1	ECI1	ECI1	CBLB
CREB1	CPSF4	CCDC9B	BUB1B	ECI2	ECI2	CBLL1
CREBBP	CPSF6	CCDC32	BUB3	ECPAS	ECPAS	CBLN4
CREG1	CPSF7	METTL26	BUD13	EDC3	EDC3	CBR1
CRELD2	CPT1A	C16orf54	BUD31	EDC4	EDC4	CBR3
CREM	CPT2	RUSF1	BYSL	EDF1	EDF1	CBR4
CRIP1	CPTP	VPS35L	BZW1	EEA1	EEA1	CBWD1
CRIP2	CRAT	C16orf70	BZW2	EED	EED	CBX1
CRIPT	CRBN	C16orf86	LCOR	EEF1A1	EEF1A1	CBX3
CRKL	CREB1	C17orf49	BORCS7	EEF1A2	EEF1A2	CBX4
CRLF3	CREBBP	BORCS6	FAM241B	EEF1AKNMT	EEF1AKNMT	CBX5
CRNKL1	CRELD2	CYBC1	VSIR	EEF1B2	EEF1B2	CBX6
CROCC	CREM	C17orf75	ARMH3	EEF1D	EEF1D	CBX7
CRTC1	CRIP1	C17orf80	C10orf88	EEF1E1	EEF1E1	CBX8
CRTC2	CRIP2	NCBP3	C11orf54	EEF1G	EEF1G	CC2D1A
CRTC3	CRIPT	C17orf97	NKAPD1	EEF2	EEF2	CC2D1B
CRYBG1	CRKL	C18orf21	C11orf68	EEFSEC	EEFSEC	CCAR1
CRYL1	CRLF3	C18orf25	HIKESHI	EFEMP1	EFEMP1	CCDC102A
CRYZ	CRNKL1	C18orf32	SPINDOC	EFHD1	EFHD1	CCDC112
CRYZL1	CROCC	RMC1	MYG1	EFHD2	EFHD2	CCDC115
CS	CRTC1	RMC1	C12orf29	EFL1	EFL1	CCDC117
CSDE1	CRTC2	MYDGF	C12orf4	EFTUD2	EFTUD2	CCDC12
CSE1L	CRTC3	C19orf12	C12orf43	EGLN1	EGLN1	CCDC124
CSK	CRYBG1	C19orf25	C12orf45	EHBP1L1	EHBP1L1	CCDC127
CSNK1A1	CRYL1	PEAK3	C12orf57	EHD1	EHD1	CCDC134
CSNK2A1	CRYZ	TRIR	C12orf65	EHD3	EHD3	CCDC137
CSNK2A2	CRYZL1	C19orf47	C12orf66	EHD4	EHD4	CCDC141
CSNK2B	CS	TIMM29	C12orf73	EIF1	EIF1	CCDC150
CSRP1	CSDE1	C19orf53	ERG28	EIF1AD	EIF1AD	CCDC153
CSTA	CSE1L	SHFL	GON7	EIF1AX	EIF1AX	CCDC158
CSTB	CSK	C1GALT1C1	DGLUCY	EIF2A	EIF2A	CCDC166
CSTF1	CSNK1A1	C1orf109	RTRAF	EIF2AK2	EIF2AK2	CCDC168
CSTF2	CSNK2A1	C1orf122	C15orf39	EIF2B1	EIF2B1	CCDC17
CSTF2T	CSNK2A2	CZIB	C15orf40	EIF2B2	EIF2B2	CCDC171
CSTF3	CSNK2B	C1orf131	CCDC9B	EIF2B3	EIF2B3	CCDC186
CTBP1	CSRP1	C1orf162	CCDC32	EIF2B4	EIF2B4	CCDC191
CTBS	CSTA	C1orf174	METTL26	EIF2B5	EIF2B5	CCDC22
CTCF	CSTB	C1orf50	C16orf54	EIF2D	EIF2D	CCDC25
CTDP1	CSTF1	C1orf52	RUSF1	EIF2S1	EIF2S1	CCDC28A
CTDSPL2	CSTF2	C1QA	VPS35L	EIF2S2	EIF2S2	CCDC39
CTNNBL1	CSTF2T	C1QB	C16orf70	EIF2S3	EIF2S3	CCDC43
CTPS1	CSTF3	C1QBP	C16orf87	EIF3A	EIF3A	CCDC47
CTPS2	CTBP1	C1QC	C17orf49	EIF3B	EIF3B	CCDC51
CTR9	CTBS	C1R	HROB	EIF3C	EIF3C	CCDC57
CTSA	CTCF	C1RL	BORCS6	EIF3D	EIF3D	CCDC58
CTSB	CTDP1	C1S	CYBC1	EIF3E	EIF3E	CCDC59
CTSC	CTDSPL2	C2	C17orf75	EIF3F	EIF3F	CCDC6
CTSD	CTLA4	RAB5IF	C17orf80	EIF3G	EIF3G	CCDC65
CTSG	CTNNBL1	C20orf27	NCBP3	EIF3H	EIF3H	CCDC66
CTSH	CTPS1	CFAP410	NDUFAF8	EIF3I	EIF3I	CCDC71
CTSS	CTPS2	GATD3A	C17orf97	EIF3J	EIF3J	CCDC77
CTSZ	CTR9	GATD3A	C18orf21	EIF3K	EIF3K	CCDC78
CUL1	CTSA	CFAP298	C18orf25	EIF3L	EIF3L	CCDC81
CUL2	CTSB	C22orf39	C18orf32	EIF3M	EIF3M	CCDC85B
CUL3	CTSC	C2CD2L	RMC1	EIF4A1	EIF4A1	CCDC86
CUL4A	CTSD	C2CD3	MYDGF	EIF4A2	EIF4A2	CCDC88B
CUL4B	CTSG	C2CD5	C19orf12	EIF4A3	EIF4A3	CCDC88C
CUL5	CTSH	C2orf42	C19orf25	EIF4B	EIF4B	CCDC9
CUL7	CTSS	LDAH	PEAK3	EIF4E	EIF4E	CCDC90B
CUSTOS	CTSZ	WDCP	TRIR	EIF4ENIF1	EIF4ENIF1	CCDC91
CUTA	CUL1	MAIP1	C19orf47	EIF4G1	EIF4G1	CCDC92
CUTC	CUL2	C2orf49	TIMM29	EIF4G2	EIF4G2	CCDC93
CWC15	CUL3	C2orf68	C19orf53	EIF4H	EIF4H	CCDC97
CWC22	CUL4A	C2orf69	C19orf54	EIF5	EIF5	CCHCR1
CWC27	CUL4B	C2orf88	SHFL	EIF5A	EIF5A	CCM2
CWF19L1	CUL5	C3	ZSWIM9	EIF5B	EIF5B	CCNC
CXCR4	CUL7	C3AR1	C1GALT1	EIF6	EIF6	CCNH
CXorf56	CUSTOS	NEPRO	C1GALT1C1	EIPR1	EIPR1	CCNK
CXXC1	CUTA	C3orf38	C1orf109	ELAC2	ELAC2	CCNL1
CYB561D2	CUTC	DIPK2A	C1orf112	ELANE	ELANE	CCNL2
CYB5A	CWC15	C4A	C1orf122	ELAVL1	ELAVL1	CCNQ
CYB5B	CWC22	C4B	CZIB	ELF1	ELF1	CCNT1
CYB5R1	CWC27	C4BPA	C1orf131	ELMO1	ELMO1	CCNT2
CYB5R3	CWF19L1	C4BPB	C1orf162	ELMO2	ELMO2	CCNY
CYBA	CXCR4	HPF1	C1orf174	ELOB	ELOB	CCR7
CYBB	CXXC1	C4orf3	RHEX	ELOC	ELOC	CCS
CYBC1	CYB561D2	FAM241A	C1orf198	ELOVL1	ELOVL1	CCT2
CYC1	CYB5A	C4orf33	C1orf21	ELP1	ELP1	CCT3
CYCS	CYB5B	C5	C1orf50	ELP2	ELP2	CCT3
CYFIP1	CYB5R1	C5AR1	C1orf52	ELP4	ELP4	CCT4
CYFIP2	CYB5R3	C5orf22	C1QA	EMB	EMB	CCT5
CYLD	CYBA	C5orf24	C1QB	EMC1	EMC1	CCT6A
CYP20A1	CYBC1	MRNIP	C1QBP	EMC2	EMC2	CCT7
CYTH1	CYC1	C5orf51	C1QC	EMD	EMD	CCT8
CYTH2	CYCS	C6	C1R	EMILIN1	EMILIN1	CCZ1
CYTH4	CYFIP1	ILRUN	C1RL	EML1	EML1	CD101
CYTIP	CYFIP2	C6orf136	C1S	EML2	EML2	CD14
CZIB	CYLD	MTRES1	C2	EML3	EML3	CD2
D2HGDH	CYP20A1	ARMT1	RAB5IF	EML4	EML4	CD247
DAD1	CYP51A1	SDHAF4	C20orf27	ENDOD1	ENDOD1	CD27
DAP3	CYTH1	C6orf89	CFAP410	ENGASE	ENGASE	CD28
DAPP1	CYTH2	C7	GATD3A	ENO1	ENO1	CD2AP
DARS	CYTH4	C7orf25	GATD3A	ENO2	ENO2	CD2BP2
DARS2	CYTIP	C7orf26	CFAP298	ENOPH1	ENOPH1	CD36
DAXX	CZIB	TRAPPC14	C22orf39	ENPP4	ENPP4	CD37
DAZAP1	DAD1	C7orf50	C2CD2L	ENSA	ENSA	CD38
DBI	DAP3	FMC1	C2CD3	EOMES	EOMES	CD3D
DBN1	DAPP1	FMC1	C2CD5	EPB41	EPB41	CD3E
DBNL	DARS	C8A	C2orf42	EPB41L2	EPB41L2	CD3EAP
DBR1	DARS2	C8B	LDAH	EPB41L3	EPB41L3	CD3G
DBT	DAXX	C8G	WDCP	EPHX2	EPHX2	CD4
DCAF1	DAZAP1	C8orf33	MAIP1	EPN1	EPN1	CD44
DCAF11	DBI	RBIS	C2orf49	EPPK1	EPPK1	CD46
DCAF13	DBN1	C8orf82	C2orf68	EPRS1	EPRS1	CD47
DCAF7	DBNL	C9	C2orf69	EPRS1	EPRS1	CD48
DCAF8	DBR1	SPOUT1	C2orf76	EPS15	EPS15	CD5
DCAKD	DBT	PAXX	C3	EPS15L1	EPS15L1	CD53
DCD	DCAF1	C9orf16	C3AR1	ERAP1	ERAP1	CD55
DCK	DCAF13	CARNMT1	NEPRO	ERAP2	ERAP2	CD58
DCP1A	DCAF7	C9orf64	C3orf38	ERBIN	ERBIN	CD59
DCP1B	DCAF8	C9orf72	DIPK2A	ERC1	ERC1	CD5L
DCPS	DCAKD	C9orf78	C4A	ERCC5	ERCC5	CD6
DCTD	DCD	CARD19	C4B	ERGIC1	ERGIC1	CD7
DCTN1	DCK	CA1	C4BPA	ERH	ERH	CD74
DCTN2	DCP1A	CA2	C4BPB	ERI1	ERI1	CD81
DCTN3	DCP1B	CA4	HPF1	ERLIN1	ERLIN1	CD84
DCTN4	DCPS	CA5B	C4orf3	ERLIN2	ERLIN2	CD8B
DCTN5	DCTD	CA8	FAM241A	ERO1A	ERO1A	CD9
DCTPP1	DCTN1	CAAP1	C5	ERP29	ERP29	CD99
DCUN1D1	DCTN2	CAB39	C5orf22	ERP44	ERP44	CD99L2
DCUN1D5	DCTN3	CAB39L	MRNIP	ESD	ESD	CDAN1
DCXR	DCTN4	CABIN1	C5orf51	ESYT1	ESYT1	CDC16
DDA1	DCTN5	CABLES2	C6	ESYT2	ESYT2	CDC23
DDAH2	DCTPP1	CACNA1A	MTRES1	ETF1	ETF1	CDC27
DDB1	DCUN1D1	CACNA2D2	ARMT1	ETFA	ETFA	CDC34
DDB2	DCUN1D5	CACTIN	C6orf47	ETFB	ETFB	CDC37
DDHD1	DCXR	CACYBP	SDHAF4	ETFDH	ETFDH	CDC37L1
DDI2	DDA1	CAD	C6orf89	ETHE1	ETHE1	CDC40
DDOST	DDAH2	CALCOCO1	C7	ETS1	ETS1	CDC42
DDRGK1	DDB1	CALCOCO2	C7orf25	EVI2B	EVI2B	CDC42
DDT	DDB2	CALD1	C7orf26	EVL	EVL	CDC42BPG
DDX1	DDHD1	CALD1	TRAPPC14	EWSR1	EWSR1	CDC42SE2
DDX10	DDI2	CALM1	C7orf50	EXOC1	EXOC1	CDC5L
DDX17	DDOST	CALML5	FMC1	EXOC3	EXOC3	CDC73
DDX18	DDRGK1	CALR	C8A	EXOC5	EXOC5	CDH24
DDX19A	DDT	CALU	C8B	EXOC7	EXOC7	CDH5
DDX19B	DDX1	CALU	C8G	EXOC8	EXOC8	CDH8
DDX20	DDX10	CAMK1	C8orf33	EXOSC1	EXOSC1	CDHR5
DDX21	DDX17	CAMK1D	RBIS	EXOSC2	EXOSC2	CDIPT
DDX23	DDX18	CAMK2D	C8orf82	EXOSC3	EXOSC3	CDK10
DDX24	DDX19A	CAMK2G	C9	EXOSC4	EXOSC4	CDK11A
DDX27	DDX19B	CAMK2G	SPOUT1	EXOSC5	EXOSC5	CDK11B
DDX28	DDX20	CAMK2G	PAXX	EXOSC6	EXOSC6	CDK12
DDX31	DDX21	CAMK4	C9orf40	EXOSC7	EXOSC7	CDK13
DDX39A	DDX23	CAMKK2	CARNMT1	EXOSC8	EXOSC8	CDK13
DDX39B	DDX24	CAMLG	C9orf64	EXOSC9	EXOSC9	CDK17
DDX3X	DDX27	CAMP	C9orf78	EZR	EZR	CDK18
DDX3Y	DDX28	CAMSAP1	CARD19	F10	F10	CDK2
DDX41	DDX31	CAND1	TMEM268	F13A1	F13A1	CDK2AP1
DDX42	DDX39A	CAND2	CA1	F2R	F2R	CDK4
DDX46	DDX39B	CANT1	CA13	F5	F5	CDK5
DDX47	DDX3X	CANX	CA2	F8A1	F8A1	CDK5RAP3
DDX49	DDX3Y	CAP1	CA5B	FABP5	FABP5	CDK6
DDX5	DDX41	CAP1	CA8	FADD	FADD	CDK7
DDX50	DDX42	CAPG	CAAP1	FAF1	FAF1	CDK9
DDX51	DDX46	CAPN1	CAB39	FAH	FAH	CDKAL1
DDX52	DDX47	CAPN15	CABIN1	FAHD1	FAHD1	CDKL3
DDX54	DDX49	CAPN2	CABLES2	FAM102A	FAM102A	CDKN1B
DDX55	DDX5	CAPN5	CACNA1A	FAM107B	FAM107B	CDKN2AIP
DDX56	DDX50	CAPN7	CACNA2D2	FAM114A2	FAM114A2	CDKN2AIPNL
DDX58	DDX51	CAPNS1	CACTIN	FAM120A	FAM120A	CDKN2C
DDX6	DDX52	CAPRIN1	CACUL1	FAM136A	FAM136A	CDKN2D
DDX60	DDX54	CAPZA1	CACYBP	FAM162A	FAM162A	CDR2L
DECR1	DDX55	CAPZA2	CAD	FAM169A	FAM169A	CDS2
DEF6	DDX56	CAPZB	CALCOCO1	FAM241A	FAM241A	CDSN
DEFA1B	DDX58	CARD11	CALCOCO2	FAM3C	FAM3C	CDV3
DEFA3	DDX59	CARD16	CALD1	FAM50A	FAM50A	CDYL
DEGS1	DDX6	CARD6	CALD1	FAM91A1	FAM91A1	CEBPB
DEK	DDX60	CARD8	CALHM2	FAM98B	FAM98B	CEBPZ
DENND1C	DECR1	CARD9	CALM1	FARSA	FARSA	CELF1
DENND2D	DEF6	CARHSP1	CALML4	FARSB	FARSB	CELF2
DENND4A	DEFA1B	NAXD	CALML5	FAS	FAS	CELSR1
DENND4B	DEGS1	CARM1	CALR	FASN	FASN	CEMIP
DENND4C	DEK	CARNS1	CALU	FAT3	FAT3	CEMIP2
DENR	DENND1C	CARS1	CALU	FBP1	FBP1	CENPA
DERA	DENND2D	CARS2	CAMK1	FBP2	FBP2	CENPB
DERL1	DENND4A	CASC3	CAMK1D	FBXO30	FBXO30	CENPE
DERL2	DENND4B	GOLM2	CAMK2D	FCAR	FCAR	CENPF
DERPC	DENND4C	KNL1	CAMK2G	FCHO1	FCHO1	CENPM
DFFA	DENR	CASK	CAMK2G	FCHSD1	FCHSD1	CENPP
DFFB	DERA	CASP1	CAMK4	FCN1	FCN1	CENPT
DGAT1	DERL1	CASP10	CAMKK2	FCSK	FCSK	CENPV
DGKA	DERL2	CASP14	CAMKMT	FDPS	FDPS	CEP120
DGKB	DESI1	CASP2	CAMLG	FDX1	FDX1	CEP135
DGKE	DFFA	CASP3	CAMP	FDXR	FDXR	CEP162
DGKZ	DFFB	CASP4	CAMSAP1	FECH	FECH	CEP164
DGLUCY	DGKA	CASP6	CAND1	FEN1	FEN1	CEP170
DGUOK	DGKB	CASP7	CAND2	FERMT3	FERMT3	CEP192
DHCR7	DGKE	CASP8	CANT1	FES	FES	CEP250
DHODH	DGKZ	CASP8AP2	CANX	FGA	FGA	CEP290
DHPS	DGLUCY	CASP9	CAP1	FGB	FGB	CEP350
DHRS1	DGUOK	CASS4	CAP1	FGD2	FGD2	CEP41
DHRS11	DHCR7	POLR1G	CAPG	FGD3	FGD3	CEP55
DHRS4	DHFR	ERC2	CAPN1	FGFBP2	FGFBP2	CEP57
DHRS7	DHODH	CAT	CAPN15	FGFR1OP2	FGFR1OP2	CEP70
DHX15	DHPS	CBFA2T3	CAPN2	FGG	FGG	CEP78
DHX16	DHRS1	CBFB	CAPN7	FGR	FGR	CEP85
DHX29	DHRS11	CBFB	CAPNS1	FH	FH	CEP85L
DHX30	DHRS4	CBFB	CAPRIN1	FHL1	FHL1	CEP89
DHX36	DHRS7	CBL	CAPZA1	FHOD1	FHOD1	CEP97
DHX37	DHX15	CBLB	CAPZA2	FIS1	FIS1	CEPT1
DHX38	DHX16	CBLL1	CAPZB	FKBP15	FKBP15	CERKL
DHX58	DHX29	CBR1	CAPZB	FKBP1A	FKBP1A	CERS2
DHX8	DHX30	CBR3	CARD11	FKBP2	FKBP2	CERS5
DHX9	DHX36	CBR4	CARD16	FKBP3	FKBP3	CERS6
DIABLO	DHX37	CBWD1	CARD17	FKBP4	FKBP4	CERT1
DIAPH1	DHX38	CBX1	CARD8	FKBP5	FKBP5	CETN2
DIDO1	DHX58	CBX3	CARD9	FKBP8	FKBP8	CETN3
DIEXF	DHX8	CBX4	CARHSP1	FLAD1	FLAD1	CETP
DIMT1	DHX9	CBX5	NAXD	FLII	FLII	CFAP100
DIP2B	DIABLO	CBX6	CARM1	FLNA	FLNA	CFAP100
DIS3	DIAPH1	CBX7	CARS1	FLNB	FLNB	CFAP20
DIS3L	DIDO1	CBX8	CARS1	FLNC	FLNC	CFAP298
DIS3L2	DIEXF	CC2D1A	CARS2	FLOT1	FLOT1	CFAP36
DKC1	DIMT1	CC2D1B	CASC3	FLOT2	FLOT2	CFAP410
DLAT	DIP2B	CCAR1	GOLM2	FLYWCH2	FLYWCH2	CFAP43
DLD	DIS3	CCAR2	KNL1	FMNL1	FMNL1	CFAP53
DLG1	DIS3L	KYAT1	CASK	FMOD	FMOD	CFAP57
DLGAP4	DIS3L2	KYAT3	CASP1	FMR1	FMR1	CFB
DLGAP5	DKC1	SGF29	CASP10	FN1	FN1	CFDP1
DLST	DLAT	CCDC102A	CASP2	FN3KRP	FN3KRP	CFH
DMAC1	DLD	CFAP36	CASP3	FNBP1	FNBP1	CFHR1
DMAC2L	DLG1	MCUB	CASP4	FNTA	FNTA	CFHR2
DMAP1	DLGAP4	CCDC110	CASP5	FOXK1	FOXK1	CFHR3
DNAAF5	DLGAP5	CCDC112	CASP6	FOXO1	FOXO1	CFI
DNAH6	DLST	CCDC115	CASP7	FOXP1	FOXP1	CFL1
DNAH8	DMAC1	CCDC12	CASP8	FRY	FRY	CFL2
DNAJA1	DMAC2L	CCDC124	CASP8AP2	FSCN1	FSCN1	CFLAR
DNAJA2	DMAP1	CCDC127	CASP9	FTH1	FTH1	CFP
DNAJA3	DNAAF5	CCDC130	CASS4	FTL	FTL	CFTR
DNAJB1	DNAH6	VPS50	ERC2	FTO	FTO	CGGBP1
DNAJB11	DNAH8	CCDC134	CAT	FTSJ1	FTSJ1	CHAMP1
DNAJB2	DNAJA1	CCDC137	CBFA2T3	FUBP1	FUBP1	CHCHD2
DNAJB6	DNAJA2	CCDC167	CBFB	FUBP3	FUBP3	CHCHD3
DNAJC1	DNAJA3	CCDC174	CBFB	FUNDC2	FUNDC2	CHCHD4
DNAJC10	DNAJB1	CCDC18	CBFB	FUS	FUS	CHCHD6
DNAJC11	DNAJB11	CCDC186	CBL	FXR1	FXR1	CHD1L
DNAJC13	DNAJB12	CCDC22	CBLB	FXR2	FXR2	CHD2
DNAJC17	DNAJB2	SVBP	CBLL1	FYB1	FYB1	CHD3
DNAJC19	DNAJB4	CCDC25	CBR1	FYCO1	FYCO1	CHD4
DNAJC2	DNAJB6	CCDC28A	CBR3	FYN	FYN	CHD5
DNAJC21	DNAJC1	CCDC43	CBR4	G3BP1	G3BP1	CHD6
DNAJC3	DNAJC10	CCDC47	CBS	G3BP2	G3BP2	CHD7
DNAJC5	DNAJC11	CCDC50	CBWD1	G6PD	G6PD	CHD8
DNAJC7	DNAJC13	CCDC51	CBWD2	GAA	GAA	CHERP
DNAJC8	DNAJC17	WASHC3	CBX1	GABPA	GABPA	CHFR
DNAJC9	DNAJC19	CCDC58	CBX3	GADD45GIP1	GADD45GIP1	CHI3L2
DNASE2	DNAJC2	CCDC59	CBX4	GAK	GAK	CHIC2
DNLZ	DNAJC21	CCDC6	CBX5	GALK1	GALK1	CHID1
DNM1L	DNAJC3	CCDC61	CBX6	GALK2	GALK2	CHKB
DNM2	DNAJC5	BICDL2	CBX8	GALM	GALM	CHM
DNMT1	DNAJC7	CCDC69	CC2D1A	GALNT2	GALNT2	CHMP1A
DNPEP	DNAJC8	CCDC71	CC2D1B	GALT	GALT	CHMP1B
DNPH1	DNAJC9	CCDC71L	CCAR1	GAN	GAN	CHMP2A
DNTTIP1	DNASE2	CCDC77	CCAR2	GANAB	GANAB	CHMP2B
DNTTIP2	DNLZ	CCDC82	KYAT1	GAPDH	GAPDH	CHMP3
DOCK10	DNM1L	CCDC85B	KYAT3	GAPVD1	GAPVD1	CHMP4A
DOCK11	DNM2	CCDC86	SGF29	GARS1	GARS1	CHMP4B
DOCK2	DNMT1	CCDC88A	CCDC102A	GART	GART	CHMP5
DOCK6	DNPEP	CCDC88B	CFAP36	GATD1	GATD1	CHMP6
DOCK8	DNPH1	CCDC88C	MCUB	GATD3A	GATD3A	CHMP7
DOCK9	DNTTIP2	CCDC9	CCDC110	GBE1	GBE1	CHORDC1
DOHH	DOCK10	CCDC90B	CCDC112	GBP1	GBP1	CHP1
DOK1	DOCK11	CCDC91	CCDC115	GBP2	GBP2	CHPF
DOK2	DOCK2	CCDC92	CCDC117	GBP4	GBP4	CHRAC1
DOP1B	DOCK6	CCDC93	CCDC12	GBP5	GBP5	CHST9
DPF2	DOCK8	YJU2	CCDC124	GBP7	GBP7	CHTOP
DPH2	DOCK9	CCDC97	CCDC127	GCA	GCA	CHUK
DPH5	DOHH	CCL3	CCDC130	GCC1	GCC1	CHURC1
DPH7	DOK1	CCM2	VPS50	GCC2	GCC2	CIAO1
DPM1	DOK2	CCNA2	CCDC134	GCDH	GCDH	CIAO2A
DPM3	DPF2	CCNB1	CCDC137	GCLC	GCLC	CIAO2B
DPP3	DPH2	CCNC	CCDC167	GCLM	GCLM	CIAO3
DPP4	DPH5	CCND2	CCDC174	GCN1	GCN1	CIAPIN1
DPP7	DPH7	CCND3	CCDC18	GDI1	GDI1	CIB1
DPP9	DPM1	CCNH	CCDC186	GDI2	GDI2	CIC
DPY30	DPM3	CCNK	CCDC22	GEMIN5	GEMIN5	CINP
DPYD	DPP3	CCNL1	SVBP	GET3	GET3	CIP2A
DPYSL2	DPP4	CCNL2	CCDC25	GET4	GET4	CIRBP
DR1	DPP7	CCNT1	CCDC28A	GFER	GFER	CISD1
DRAP1	DPP9	CCNT2	CCDC28B	GFM1	GFM1	CISD2
DRG1	DPY30	CCNY	CCDC43	GFPT1	GFPT1	CISD3
DRG2	DPYD	CCNYL1	CCDC47	GFUS	GFUS	CIZ1
DSC1	DPYSL2	CCP110	CCDC50	GGA1	GGA1	CKAP4
DSG1	DR1	CCPG1	CCDC51	GGA2	GGA2	CKAP5
DSN1	DRAP1	CCR6	WASHC3	GGA3	GGA3	CKB
DSP	DRG1	CCR7	CCDC58	GGACT	GGACT	CKLF
DST	DRG2	NOCT	CCDC59	GGCT	GGCT	CKLF
DSTN	DSG1	CCS	CCDC6	GGH	GGH	CLASP1
DTD1	DSN1	CCSAP	CCDC61	GGPS1	GGPS1	CLASP2
DTNBP1	DSP	CCT2	BICDL2	GHITM	GHITM	CLASRP
DTX3L	DST	CCT3	CCDC69	GID8	GID8	CLC
DTYMK	DSTN	CCT4	CCDC71	GIGYF1	GIGYF1	CLCC1
DUS1L	DTD1	CCT5	CCDC71L	GIGYF2	GIGYF2	CLCN7
DUS3L	DTNBP1	CCT6A	CCDC77	GIMAP1	GIMAP1	CLCNKB
DUSP11	DTX3L	CCT7	CCDC82	GIMAP4	GIMAP4	CLEC16A
DUSP12	DTYMK	CCT8	CCDC85B	GIMAP5	GIMAP5	CLEC3B
DUSP23	DUS1L	CCZ1	CCDC85C	GIMAP6	GIMAP6	CLEC4F
DUT	DUS3L	CD101	CCDC86	GIMAP7	GIMAP7	CLIC1
DVL2	DUSP11	CD14	CCDC88A	GIMAP8	GIMAP8	CLIC4
DYNC1H1	DUSP12	CD151	CCDC88B	GIPC1	GIPC1	CLIC6
DYNC1I1	DUSP23	CD163	CCDC88C	GIT1	GIT1	CLINT1
DYNC1I2	DUT	CD177	CCDC9	GIT2	GIT2	CLIP1
DYNC1LI1	DVL2	CD180	CCDC90B	GLB1	GLB1	CLIP2
DYNC1LI2	DYNC1H1	CD2	CCDC91	GLG1	GLG1	CLK3
DYNLL1	DYNC1I1	CD200	CCDC92	GLIPR2	GLIPR2	CLK4
DYNLL2	DYNC1I2	CD200R1	CCDC93	GLO1	GLO1	CLN5
DYNLRB1	DYNC1LI1	CD207	YJU2	GLOD4	GLOD4	CLNS1A
DYNLT3	DYNC1LI2	CD22	CCDC97	GLRX	GLRX	CLP1
DYRK1A	DYNLL1	CD226	CCL18	GLRX3	GLRX3	CLPB
EARS2	DYNLL2	CD247	CCL3L1	GLRX5	GLRX5	CLPP
EBNA1BP2	DYNLRB1	CD248	CCM2	GLS	GLS	CLPTM1
EBP	DYNLT1	CD27	CCNA2	GLTP	GLTP	CLPTM1L
ECH1	DYNLT3	CD28	CCNB1	GLUD1	GLUD1	CLPX
ECHDC1	DYRK1A	CD2AP	CCNB2	GLUL	GLUL	CLSTN1
ECHDC2	EAF1	CD2BP2	CCNC	GLYR1	GLYR1	CLTA
ECHS1	EARS2	CD300A	CCND2	GM2A	GM2A	CLTB
ECI1	EBNA1BP2	CD300E	CCND3	GMDS	GMDS	CLTC
ECI2	EBP	CD320	CCNDBP1	GMEB1	GMEB1	CLU
ECPAS	ECD	CD33	CCNH	GMEB2	GMEB2	CLYBL
EDC3	ECH1	CD36	CCNK	GMFB	GMFB	CMAS
EDC4	ECHDC1	CD37	CCNL1	GMFG	GMFG	CMBL
EDF1	ECHS1	CD38	CCNL2	GMIP	GMIP	CMC1
EEA1	ECI1	CD3D	CCNT1	GMPPA	GMPPA	CMC2
EED	ECI2	CD3E	CCNY	GMPPB	GMPPB	CMIP
EEF1A1	ECPAS	POLR1G	CCNYL1	GMPR2	GMPR2	CMPK1
EEF1AKNMT	EDC3	CD3G	CCP110	GMPS	GMPS	CMPK2
EEF1B2	EDC4	CD4	CCPG1	GNA13	GNA13	CMTM5
EEF1D	EDF1	CD40	CCR1	GNAI2	GNAI2	CMTM6
EEF1E1	EEA1	CD40LG	CCR2	GNAI3	GNAI3	CMTM7
EEF1G	EED	CD44	CCR6	GNAQ	GNAQ	CMYA5
EEF2	EEF1A1	CD46	CCR7	GNAS	GNAS	CNBP
EEFSEC	EEF1AKNMT	CD46	CCRL2	GNB1	GNB1	CNBP
EFHD1	EEF1B2	CD47	NOCT	GNB1L	GNB1L	CNDP1
EFHD2	EEF1D	CD48	CCS	GNB2	GNB2	CNDP2
EFL1	EEF1E1	CD5	CCT2	GNB4	GNB4	CNIH4
EFTUD2	EEF1G	CD55	CCT3	GNE	GNE	CNN2
EGLN1	EEF2	CD58	CCT4	GNG2	GNG2	CNN3
EHBP1L1	EEFSEC	CD59	CCT5	GNL1	GNL1	CNNM3
EHD1	EFHD2	CD5L	CCT6A	GNPDA1	GNPDA1	CNOT1
EHD4	EFL1	CD6	CCT7	GNPDA2	GNPDA2	CNOT10
EHMT1	EFTUD2	CD63	CCT8	GNPNAT1	GNPNAT1	CNOT2
EHMT2	EGLN1	CD69	CCZ1	GNS	GNS	CNOT3
EIF1	EHBP1L1	CD7	CD101	GOLGA2	GOLGA2	CNOT6L
EIF1AD	EHD1	CD72	CD109	GOLGA3	GOLGA3	CNOT7
EIF1AX	EHD4	CD74	CD14	GOLGA4	GOLGA4	CNOT9
EIF2A	EHMT1	CD79A	CD151	GOLGA5	GOLGA5	CNP
EIF2AK2	EIF1	CD79B	CD163	GOLM1	GOLM1	CNPY2
EIF2B1	EIF1AD	CD80	CD177	GOLPH3	GOLPH3	CNPY3
EIF2B2	EIF1AX	CD81	CD19	GOLPH3L	GOLPH3L	CNPY4
EIF2B3	EIF1B	CD82	CD2	GOPC	GOPC	CNRIP1
EIF2B4	EIF2A	CD83	CD200	GORASP2	GORASP2	CNST
EIF2B5	EIF2AK2	CD84	CD200R1	GOSR1	GOSR1	CNTLN
EIF2D	EIF2B1	CD8A	CD207	GOSR2	GOSR2	CNTN1
EIF2S1	EIF2B2	CD8B	CD209	GOT1	GOT1	CNTRL
EIF2S2	EIF2B3	CD96	CD22	GOT2	GOT2	CNTROB
EIF2S3	EIF2B4	ADGRE5	CD226	GP1BA	GP1BA	COA5
EIF3A	EIF2B5	CD99	CD247	GP1BB	GP1BB	COASY
EIF3B	EIF2D	CD99	CD27	GP9	GP9	COG1
EIF3C	EIF2S1	CD99	CD276	GPA33	GPA33	COG2
EIF3D	EIF2S2	CD99L2	CD28	GPALPP1	GPALPP1	COG3
EIF3E	EIF2S3	CDAN1	CD2AP	GPCPD1	GPCPD1	COG4
EIF3F	EIF3A	CDC123	CD2BP2	GPD1L	GPD1L	COG5
EIF3G	EIF3B	CDC16	CD300A	GPD2	GPD2	COG6
EIF3H	EIF3C	CDC20	CD320	GPHN	GPHN	COG7
EIF3I	EIF3D	CDC23	CD36	GPI	GPI	COG8
EIF3J	EIF3E	CDC25B	CD37	GPKOW	GPKOW	COIL
EIF3K	EIF3F	CDC25C	CD38	GPN1	GPN1	COL18A1
EIF3L	EIF3G	CDC26	CD3D	GPR171	GPR171	COL1A2
EIF3M	EIF3H	CDC27	CD3E	GPR68	GPR68	COL2A1
EIF4A1	EIF3I	CDC27	POLR1G	GPRIN3	GPRIN3	COL6A1
EIF4A2	EIF3J	CDK11B	CD3G	GPS1	GPS1	COL6A5
EIF4A3	EIF3K	CDC34	CD4	GPX1	GPX1	COL6A6
EIF4B	EIF3L	CDC37	CD40	GPX4	GPX4	COMMD1
EIF4E	EIF3M	CDC37L1	CD40LG	GRAP	GRAP	COMMD10
EIF4E2	EIF4A1	CDC40	CD44	GRAP2	GRAP2	COMMD2
EIF4E3	EIF4A2	CDC42	CD46	GRB2	GRB2	COMMD3
EIF4EBP2	EIF4A3	CDC42	CD46	GRHPR	GRHPR	COMMD3-BMI1
EIF4ENIF1	EIF4B	CDC42BPB	CD47	GRIPAP1	GRIPAP1	COMMD4
EIF4G2	EIF4E	CDC42SE1	CD48	GRK2	GRK2	COMMD5
EIF4H	EIF4E2	CDC42SE2	CD5	GRK6	GRK6	COMMD6
EIF5	EIF4E3	CDC45	CD55	GRPEL1	GRPEL1	COMMD7
EIF5A	EIF4EBP2	CDC5L	CD58	GRSF1	GRSF1	COMMD8
EIF5B	EIF4ENIF1	CDC73	CD59	GRWD1	GRWD1	COMMD9
EIF6	EIF4G2	CDCA7L	CD5L	GSDMA	GSDMA	COMP
EIPR1	EIF4H	CDCA8	CD6	GSDMD	GSDMD	COMT
ELAC2	EIF5	CDH1	CD63	GSK3A	GSK3A	COMTD1
ELANE	EIF5A	CDH13	CD69	GSK3B	GSK3B	COP1
ELAVL1	EIF5B	CDH6	CD7	GSKIP	GSKIP	COPA
ELF1	EIF6	CDIPT	CD70	GSN	GSN	COPB1
ELK1	EIPR1	CDK1	CD72	GSPT1	GSPT1	COPB2
ELL	ELAC2	CDK11A	CD74	GSPT2	GSPT2	COPE
ELMO1	ELANE	CDK12	CD79B	GSR	GSR	COPG1
ELMO2	ELAVL1	CDK13	CD81	GSS	GSS	COPG2
ELMOD2	ELF1	CDK16	CD82	GSTK1	GSTK1	COPS2
ELMSAN1	ELK1	CDK17	CD84	GSTM2	GSTM2	COPS3
ELOA	ELL	CDK19	CD8A	GSTM3	GSTM3	COPS4
ELOB	ELMO1	CDK2	CD9	GSTO1	GSTO1	COPS5
ELOC	ELMO2	CDK2AP1	CD93	GSTP1	GSTP1	COPS6
ELOF1	ELMOD2	CDK4	CD96	GTF2B	GTF2B	COPS7A
ELP1	ELMSAN1	CDK5	ADGRE5	GTF2E2	GTF2E2	COPS7B
ELP2	ELOA	CDK5RAP1	CD99	GTF2F1	GTF2F1	COPS8
ELP3	ELOB	CDK5RAP2	CD99	GTF2F2	GTF2F2	COPZ1
ELP4	ELOC	CDK5RAP3	CD99	GTF2H2C	GTF2H2C	COQ3
ELP5	ELOF1	CDK6	CD99L2	GTF2I	GTF2I	COQ5
ELP6	ELOVL1	CDK7	CDA	GTPBP1	GTPBP1	COQ6
EMB	ELOVL5	CDK9	CDAN1	GTPBP3	GTPBP3	COQ7
EMC1	ELP1	CDKAL1	CDC123	GUK1	GUK1	COQ8A
EMC2	ELP2	CDKN1B	CDC16	GUSB	GUSB	COQ8B
EMC3	ELP3	CDKN1C	CDC20	GYG1	GYG1	COQ9
EMC4	ELP4	CDKN2AIP	CDC23	GYS1	GYS1	CORO1A
EMC7	ELP5	CDKN2AIPNL	CDC25C	GZMA	GZMA	CORO1B
EMC8	ELP6	CDKN2C	CDC26	GZMB	GZMB	CORO1C
EMD	EMB	CDR2	CDC27	GZMH	GZMH	CORO2A
EMG1	EMC1	CDS2	CDC27	GZMK	GZMK	CORO7
EML2	EMC10	CDV3	CDK11B	H1-10	H1-10	CORO7-PAM16
EML3	EMC2	CDYL	CDC34	H1-2	H1-2	COTL1
EML4	EMC3	CDYL2	CDC37	H1-3	H1-3	COX11
EMSY	EMC4	CEACAM1	CDC37	H1-4	H1-4	COX17
ENDOD1	EMC7	CEACAM6	CDC37	H1-5	H1-5	COX18
ENDOG	EMC8	CEACAM8	CDC40	H2AC14	H2AC14	COX19
ENGASE	EMD	CEBPB	CDC42	H2AC6	H2AC6	COX20
ENO1	EMG1	CEBPZ	CDC42	H2AZ2	H2AZ2	COX4I1
ENO2	EML2	ADA2	CDC42BPB	H2BC13	H2BC13	COX5A
ENOPH1	EML3	HDHD5	CDC42SE1	H3C15	H3C15	COX5B
ENOSF1	EML4	CELF1	CDC42SE2	H4C1	H4C1	COX6A1
ENSA	EMSY	CELF2	CDC45	H6PD	H6PD	COX6B1
ENY2	ENDOD1	CENPB	CDC5L	HAAO	HAAO	COX6C
EP300	ENDOG	CENPC	CDC7	HADH	HADH	COX7A2
EP400	ENGASE	CENPE	CDC73	HADHA	HADHA	COX7A2L
EPB41	ENO1	CENPF	CDCA2	HADHB	HADHB	COX7B
EPB41L2	ENO2	CENPH	CDCA3	HAGH	HAGH	COX7C
EPC1	ENOPH1	CENPJ	CDCA5	HARS1	HARS1	CP
EPHA1	ENOSF1	CENPK	CDCA7	HARS2	HARS2	CPB1
EPHX2	ENSA	CENPL	CDCA7L	HAT1	HAT1	CPB2
EPM2AIP1	ENY2	CENPN	CDCA8	HBA1	HBA1	CPN1
EPN1	EP300	CENPV	CDCP1	HBB	HBB	CPN2
EPPK1	EP400	CENPV	CDH13	HBS1L	HBS1L	CPNE1
EPRS	EPB41	CEP120	CDH17	HCCS	HCCS	CPNE2
EPS15	EPB41L2	CEP128	CDH5	HCFC1	HCFC1	CPNE3
EPS15L1	EPC1	CEP131	CDIPT	HCK	HCK	CPOX
EPS8L2	EPHX2	CEP135	CDK1	HCLS1	HCLS1	CPPED1
EPX	EPN1	CEP164	CDK11A	HDAC1	HDAC1	CPQ
ERAP1	EPPK1	CEP170	CDK12	HDAC2	HDAC2	CPSF1
ERAP2	EPRS	CEP192	CDK13	HDAC6	HDAC6	CPSF2
ERBIN	EPS15	CEP250	CDK16	HDAC7	HDAC7	CPSF3
ERC1	EPS15L1	CEP350	CDK17	HDDC2	HDDC2	CPSF4
ERCC2	EPSTI1	CEP41	CDK19	HDDC3	HDDC3	CPSF6
ERCC3	EPX	CEP44	CDK2	HDGF	HDGF	CPSF7
ERCC5	ERAP1	CEP57	CDK2AP1	HDGFL2	HDGFL2	CPT1A
ERGIC1	ERAP2	CEP63	CDK4	HDGFL3	HDGFL3	CPT2
ERGIC2	ERBIN	CEP68	CDK5	HDHD2	HDHD2	CPTP
ERH	ERC1	CEP72	CDK5RAP1	HDHD3	HDHD3	CRADD
ERI1	ERCC3	CEP76	CDK5RAP2	HDHD5	HDHD5	CRAT
ERI3	ERCC5	CEP78	CDK5RAP3	HDLBP	HDLBP	CRBN
ERLEC1	ERGIC1	CEP85L	CDK6	HEBP1	HEBP1	CREB1
ERLIN2	ERGIC2	CEP97	CDK7	HEBP2	HEBP2	CREB3L1
ERMP1	ERH	CEPT1	CDK9	HECTD1	HECTD1	CREBBP
ERO1A	ERI1	CERS2	CDKAL1	HECTD3	HECTD3	CREBRF
ERP29	ERLIN2	CERS4	CDKN1A	HECTD4	HECTD4	CREBZF
ERP44	ERMP1	CERS5	CDKN1B	HERC4	HERC4	CRELD1
ERVK3-1	ERO1A	CERS6	CDKN2AIP	HEXA	HEXA	CRELD2
ESD	ERP29	CES1	CDKN2AIPNL	HEXB	HEXB	CRIP1
ESF1	ERP44	CETN2	CDKN2C	HEXIM1	HEXIM1	CRIP2
ESYT1	ERVK3-1	CETN3	CDKN2D	HGH1	HGH1	CRIPT
ESYT2	ESD	CETP	CDKN3	HGS	HGS	CRK
ETF1	ESF1	CFAP20	CDR2	HIBADH	HIBADH	CRKL
ETFA	ESYT1	CFB	CDS2	HIBCH	HIBCH	CRLF2
ETFB	ESYT2	CFD	CDT1	HINT1	HINT1	CRLF3
ETFDH	ETF1	CFDP1	CDV3	HINT2	HINT2	CRNKL1
ETHE1	ETFA	CFH	CDYL	HINT3	HINT3	CROCC
ETNK1	ETFB	CFHR1	CDYL2	HIP1R	HIP1R	CROT
ETS1	ETFDH	CFHR2	CEACAM1	HK1	HK1	CRTC1
ETV6	ETHE1	CFHR4	CEACAM8	HK2	HK2	CRTC2
EVI2B	ETNK1	CFHR5	CEBPB	HK3	HK3	CRTC3
EVL	ETS1	CFI	CEBPZ	HLA-A	HLA-A	CRYAB
EWSR1	ETV6	CFL1	ADA2	HLA-A	HLA-A	CRYBG1
EXOC1	EVI2B	CFL2	HDHD5	HLA-A	HLA-A	CRYL1
EXOC2	EVL	CFLAR	CELF1	HLA-A	HLA-A	CRYZ
EXOC3	EWSR1	CFP	CELF2	HLA-A	HLA-A	CRYZL1
EXOC4	EXOC1	CGGBP1	CEND1	HLA-A	HLA-A	CS
EXOC5	EXOC2	CHAF1A	CENPB	HLA-B	HLA-B	CSDE1
EXOC7	EXOC3	CHAMP1	CENPC	HLA-B	HLA-B	CSE1L
EXOC8	EXOC4	CHCHD1	CENPE	HLA-B	HLA-B	CSK
EXOG	EXOC5	CHCHD10	CENPF	HLA-B	HLA-B	CSNK1A1
EXOSC1	EXOC7	CHCHD2	CENPH	HLA-B	HLA-B	CSNK1E
EXOSC10	EXOC8	CHCHD3	CENPI	HLA-C	HLA-C	CSNK1G3
EXOSC2	EXOG	CHCHD4	CENPJ	HLA-DPB1	HLA-DPB1	CSNK2A1
EXOSC3	EXOSC1	CHCHD5	CENPK	HLA-DQB1	HLA-DQB1	CSNK2A2
EXOSC4	EXOSC10	CHCHD6	CENPL	HLA-DRA	HLA-DRA	CSNK2B
EXOSC5	EXOSC2	CHCHD7	CENPM	HLA-DRB1	HLA-DRB1	CSPG4
EXOSC6	EXOSC3	CHD1	CENPN	HLA-DRB1	HLA-DRB1	CSRP1
EXOSC7	EXOSC4	CHD1L	CENPO	HLA-DRB1	HLA-DRB1	CST1
EXOSC8	EXOSC5	CHD2	CENPP	HLA-DRB1	HLA-DRB1	CST4
EXOSC9	EXOSC6	CHD3	CENPQ	HLA-DRB3	HLA-DRB3	CSTA
EZH2	EXOSC7	CHD3	CENPT	HLA-DRB5	HLA-DRB5	CSTB
EZR	EXOSC8	CHD4	CENPU	HLA-E	HLA-E	CSTF1
F11R	EXOSC9	CHD6	CENPV	HLA-F	HLA-F	CSTF2
F2	EYA3	CHD7	CENPV	HLA-G	HLA-G	CSTF2T
F8A3	EZH2	CHD8	CEP120	HM13	HM13	CSTF3
FABP5	EZR	CHD9	CEP128	HMBS	HMBS	CTBP1
FADD	F11R	CHEK1	CEP131	HMCES	HMCES	CTBS
FAF1	F2	CHEK2	CEP135	HMGB1	HMGB1	CTC1
FAF2	F8A3	CHERP	CEP152	HMGB2	HMGB2	CTCF
FAH	FABP5	CHFR	CEP164	HMGB3	HMGB3	CTDNEP1
FAHD1	FADD	CHGA	CEP170	HMGCL	HMGCL	CTDP1
FAHD2A	FAF1	CHI3L1	CEP192	HMGCS1	HMGCS1	CTDSP1
FAM102A	FAF2	CHI3L2	CEP250	HMOX1	HMOX1	CTDSPL2
FAM107B	FAH	CHID1	CEP350	HMOX2	HMOX2	CTF1
FAM111A	FAHD1	CHIT1	CEP41	HNMT	HNMT	CTNNBL1
FAM114A2	FAHD2A	CHKB	CEP44	HNRNPA1	HNRNPA1	CTPS1
FAM118A	FAM102A	CHM	CEP55	HNRNPA2B1	HNRNPA2B1	CTPS2
FAM120A	FAM107B	CHML	CEP57	HNRNPA3	HNRNPA3	CTR9
FAM120B	FAM111A	CHMP1A	CEP63	HNRNPAB	HNRNPAB	CTSA
FAM129A	FAM114A2	CHMP1B	CEP68	HNRNPC	HNRNPC	CTSB
FAM129B	FAM118A	CHMP2A	CEP72	HNRNPD	HNRNPD	CTSC
FAM133B	FAM120A	CHMP2B	CEP76	HNRNPDL	HNRNPDL	CTSS
FAM160B1	FAM120B	CHMP3	CEP85	HNRNPF	HNRNPF	CTSW
FAM162A	FAM126B	CHMP4A	CEP85L	HNRNPH1	HNRNPH1	CTSZ
FAM169A	FAM129A	CHMP4A	CEP97	HNRNPH2	HNRNPH2	CTTN
FAM172A	FAM133B	CHMP4B	CEPT1	HNRNPH3	HNRNPH3	CTTNBP2
FAM192A	FAM136A	CHMP5	CERS2	HNRNPK	HNRNPK	CTTNBP2NL
FAM207A	FAM160B1	CHMP6	CERS4	HNRNPL	HNRNPL	CTU2
FAM241A	FAM162A	CHMP7	CERS5	HNRNPLL	HNRNPLL	CUBN
FAM32A	FAM169A	CHN2	CERS6	HNRNPM	HNRNPM	CUL1
FAM45BP	FAM172A	CHORDC1	CES1	HNRNPR	HNRNPR	CUL2
FAM49B	FAM192A	CHP1	CETN2	HNRNPU	HNRNPU	CUL3
FAM50A	FAM207A	CHPF	CETN3	HNRNPUL1	HNRNPUL1	CUL4A
FAM76B	FAM241A	CHRAC1	CETP	HNRNPUL2	HNRNPUL2	CUL4B
FAM91A1	FAM32A	CHTF18	CFAP20	HOOK1	HOOK1	CUL5
FAM98A	FAM3C	CHTF8	CFB	HOOK3	HOOK3	CUTA
FAM98B	FAM45BP	CHTOP	CFD	HPCAL1	HPCAL1	CUTC
FAM98C	FAM49B	CHUK	CFDP1	HPF1	HPF1	CUX1
FARS2	FAM50A	CHURC1	CFH	HPRT1	HPRT1	CUX1
FARSA	FAM53C	CIAO1	CFHR1	HS1BP3	HS1BP3	CWC15
FARSB	FAM76B	CIAPIN1	CFHR2	HSD17B10	HSD17B10	CWC22
FAS	FAM91A1	CIB1	CFHR5	HSD17B11	HSD17B11	CWC25
FASN	FAM98A	CIC	CFI	HSD17B12	HSD17B12	CWC27
FASTKD1	FAM98B	CINP	CFL1	HSD17B4	HSD17B4	CWF19L1
FASTKD2	FAM98C	CIR1	CFL2	HSD17B8	HSD17B8	CWF19L2
FBL	FANCD2	CIRBP	CFLAR	HSDL2	HSDL2	CXorf38
FBLL1	FANCI	UTP4	CFP	HSF1	HSF1	CXorf56
FBP1	FARS2	CISD1	CGGBP1	HSP90AA1	HSP90AA1	CXorf58
FBP2	FARSA	CISD2	CGREF1	HSP90AB1	HSP90AB1	CXXC1
FBXL8	FARSB	CISD3	CHAC2	HSP90AB4P	HSP90AB4P	CYB561D2
FBXO2	FAS	CIT	CHAF1A	HSP90B1	HSP90B1	CYB5A
FBXO22	FASN	CIZ1	CHAF1B	HSPA13	HSPA13	CYB5B
FBXO3	FASTKD1	CKAP4	CHAMP1	HSPA14	HSPA14	CYB5R1
FBXO38	FASTKD2	CKAP5	CHCHD1	HSPA1A	HSPA1A	CYB5R3
FBXO7	FASTKD5	CKB	CHCHD10	HSPA4	HSPA4	CYBA
FBXW2	FBH1	CKM	CHCHD2	HSPA5	HSPA5	CYBC1
FCF1	FBL	CKMT1A	CHCHD3	HSPA6	HSPA6	CYC1
FCHO1	FBLL1	CKS1B	CHCHD4	HSPA8	HSPA8	CYFIP1
FCHSD1	FBP1	CLASP1	CHCHD5	HSPA9	HSPA9	CYFIP2
FCMR	FBXL8	CLASP2	CHCHD6	HSPB1	HSPB1	CYHR1
FCN1	FBXO2	CLASRP	CHCHD7	HSPBP1	HSPBP1	CYLD
FCSK	FBXO22	CLC	CHD1	HSPD1	HSPD1	CYP20A1
FDFT1	FBXO3	CLCC1	CHD1L	HSPE1	HSPE1	CYP26B1
FDPS	FBXO38	CLCN5	CHD2	HSPH1	HSPH1	CYP26C1
FDXR	FBXO7	CLCN7	CHD3	HTATIP2	HTATIP2	CYP2R1
FECH	FBXW11	CLDND1	CHD3	HTATSF1	HTATSF1	CYP4F11
FEN1	FCF1	CLEC12A	CHD4	HUWE1	HUWE1	CYP4Z1
FERMT3	FCHO1	CLEC16A	CHD6	HVCN1	HVCN1	CYP51A1
FGD3	FCHSD1	CLEC16A	CHD7	HYOU1	HYOU1	CYREN
FGFR1OP2	FCSK	CLEC17A	CHD8	HYPK	HYPK	CYRIB
FGG	FDFT1	CLEC2D	CHEK1	IAH1	IAH1	CYSLTR2
FH	FDPS	CLEC3B	CHEK2	IARS1	IARS1	CYTH1
FHL1	FDXR	CLEC4A	CHERP	IARS2	IARS2	CYTH2
FHOD1	FECH	CLEC4D	CHFR	IBA57	IBA57	CYTH3
FIBP	FEN1	CLEC7A	CHGA	ICAM1	ICAM1	CYTH4
FIP1L1	FERMT3	CLGN	CHI3L1	ICAM3	ICAM3	CYTIP
FIS1	FGA	CLIC1	CHI3L2	ICOS	ICOS	CZIB
FKBP11	FGD3	CLIC2	CHID1	IDE	IDE	D2HGDH
FKBP15	FGFR1OP2	CLIC3	CHIT1	IDH1	IDH1	DAAM2
FKBP1A	FGG	CLIC4	CHKB	IDH2	IDH2	DAD1
FKBP2	FH	CLIC5	CHL1	IDH3A	IDH3A	DAG1
FKBP3	FHL1	CLINT1	CHM	IDH3B	IDH3B	DAGLB
FKBP4	FHOD1	CLIP1	CHML	IDH3G	IDH3G	DAP
FKBP5	FIBP	CLIP1	CHMP1A	IDI1	IDI1	DAP3
FKBP8	FIP1L1	CLIP2	CHMP1B	IDUA	IDUA	DAPK3
FLAD1	FIS1	CLK1	CHMP2A	IFI16	IFI16	DAPL1
FLI1	FKBP11	CLK2	CHMP2B	IFI35	IFI35	DAPP1
FLII	FKBP15	CLK3	CHMP3	IFIH1	IFIH1	DARS1
FLNA	FKBP1A	CLK4	CHMP4A	IFIT1	IFIT1	DARS2
FLNB	FKBP2	CLN3	CHMP4A	IFIT2	IFIT2	DAXX
FLOT1	FKBP3	CLN5	CHMP4B	IFIT3	IFIT3	DAZAP1
FLOT2	FKBP4	CLN6	CHMP5	IFIT5	IFIT5	DBI
FLYWCH2	FKBP5	CLN8	CHMP6	IFITM1	IFITM1	DBN1
FMNL1	FKBP8	CLNS1A	CHMP7	IFT27	IFT27	DBNL
FMR1	FLAD1	CLP1	CHN2	IGBP1	IGBP1	DBNL
FN1	FLI1	CLPB	CHORDC1	IGF2	IGF2	DBP
FN3K	FLII	CLPP	CHP1	IGF2BP2	IGF2BP2	DBR1
FN3KRP	FLNA	CLPTM1	CHPF	IGF2R	IGF2R	DCAF1
FNBP1	FLNB	CLPTM1L	CHPF2	IGFBP2	IGFBP2	DCAF11
FNBP4	FLOT1	CLPX	CHRAC1	IGHG1	IGHG1	DCAF13
FNDC3A	FLOT2	CLSPN	CHST11	IGHG2	IGHG2	DCAF5
FNTA	FLYWCH2	CLSTN3	CHST12	IGKC	IGKC	DCAF6
FNTB	FMNL1	CLTA	CHST14	IGLL5	IGLL5	DCAF7
FOCAD	FMR1	CLTB	CHST2	IGSF8	IGSF8	DCAF8
FOXK1	FN1	CLTC	CHSY1	IKBIP	IKBIP	DCAKD
FOXO1	FN3K	CLTCL1	CHTF18	IKBKB	IKBKB	DCD
FOXP1	FN3KRP	CLU	CHTF8	IKBKG	IKBKG	DCHS2
FOXRED1	FNBP1	CLUH	CHTF8	IL16	IL16	DCK
FPGT	FNBP4	CLYBL	CHTOP	IL18	IL18	DCLK3
FRG1	FNDC3A	CMAS	CHUK	IL1A	IL1A	DCLRE1C
FRYL	FNTA	CMBL	CHURC1	IL1B	IL1B	DCP1A
FSCN1	FNTB	CMC1	CIAO1	IL1RN	IL1RN	DCP1B
FTH1	FOCAD	CMC2	CIAPIN1	IL2RA	IL2RA	DCP2
FTL	FOXK1	CMC4	CIB1	IL2RG	IL2RG	DCPS
FTO	FOXO1	CMIP	CIC	IL36G	IL36G	DCTD
FTSJ1	FOXP1	CMPK1	CINP	IL4I1	IL4I1	DCTN1
FTSJ3	FOXP3	CMPK2	CIR1	IL6	IL6	DCTN2
FUBP1	FOXRED1	CMSS1	CIRBP	ILF2	ILF2	DCTN3
FUBP3	FPGS	CMTM5	UTP4	ILF3	ILF3	DCTN4
FUCA1	FPGT	CMTM6	CISD1	ILK	ILK	DCTN5
FUNDC2	FRG1	CMTM7	CISD2	ILKAP	ILKAP	DCTN6
FUS	FRYL	CMTR1	CISD3	IMMT	IMMT	DCTPP1
FXN	FSCN1	CMTR2	CISH	IMPA1	IMPA1	DCUN1D1
FXR1	FTH1	CNBP	CIT	IMPDH1	IMPDH1	DCUN1D3
FXR2	FTL	CNBP	CIZ1	IMPDH2	IMPDH2	DCUN1D4
FYB1	FTO	CNDP1	CKAP2	INF2	INF2	DCUN1D5
FYN	FTSJ1	CNDP2	CKAP2L	INPP1	INPP1	DCXR
FYTTD1	FTSJ3	CNEP1R1	CKAP4	INPP4A	INPP4A	DDA1
G3BP1	FUBP1	CNFN	CKAP5	INPP4B	INPP4B	DDAH2
G3BP2	FUBP3	CNIH4	CKB	INPP5B	INPP5B	DDB1
G6PD	FUCA1	CNN2	CKM	INPP5D	INPP5D	DDB2
GAA	FUNDC2	CNN3	CKS1B	INPPL1	INPPL1	DDHD1
GABARAP	FURIN	CNNM3	CKS2	INTS13	INTS13	DDHD2
GABARAPL1	FUS	CNNM4	CLASP1	IPCEF1	IPCEF1	DDI2
GABPA	FXN	CNOT1	CLASP2	IPO5	IPO5	DDOST
GABPB2	FXR1	CNOT10	CLASP2	IPO7	IPO7	DDRGK1
GADD45GIP1	FXR2	CNOT11	CLASRP	IQGAP1	IQGAP1	DDT
GAK	FYB1	CNOT2	CLC	IQGAP2	IQGAP2	DDX1
GALE	FYN	CNOT3	CLCC1	IRAK4	IRAK4	DDX10
GALK1	FYTTD1	CNOT4	CLCN3	IREB2	IREB2	DDX17
GALK2	G3BP1	CNOT6L	CLCN5	IRF2BP2	IRF2BP2	DDX18
GALM	G3BP2	CNOT7	CLCN7	IRF2BPL	IRF2BPL	DDX19A
GALNT2	G6PD	CNOT8	CLDND1	IRF3	IRF3	DDX19B
GALT	GAA	CNP	CLEC16A	IRF4	IRF4	DDX19B
GAMT	GABARAP	CNPY2	CLEC17A	IRF5	IRF5	DDX20
GANAB	GABARAPL1	CNPY3	CLEC2B	IRF7	IRF7	DDX21
GAPDH	GABARAPL2	CNPY4	CLEC2D	IRF8	IRF8	DDX23
GAPVD1	GABPA	CNST	CLEC3B	IRF9	IRF9	DDX24
GAR1	GADD45GIP1	CNTN1	CLEC4A	IRGQ	IRGQ	DDX27
GARS	GAK	CNTNAP1	CLEC4C	ISCA2	ISCA2	DDX28
GART	GALE	CNTRL	CLEC7A	ISCU	ISCU	DDX31
GATAD2A	GALK1	CNTROB	CLIC1	ISG15	ISG15	DDX39A
GATAD2B	GALK2	COA1	CLIC2	ISG20	ISG20	DDX39B
GATD1	GALM	COA3	CLIC3	ISOC1	ISOC1	DDX3X
GATD3B	GALNT2	COA4	CLIC4	ISOC2	ISOC2	DDX3Y
GBE1	GALT	COA5	CLIC5	IST1	IST1	DDX4
GBF1	GANAB	COA6	CLINT1	ISYNA1	ISYNA1	DDX41
GBP1	GAPDH	COA7	CLIP1	ITGA2B	ITGA2B	DDX42
GBP2	GAPVD1	COASY	CLIP1	ITGA4	ITGA4	DDX46
GBP4	GAR1	COBLL1	CLIP2	ITGA5	ITGA5	DDX47
GBP5	GARS	COG1	CLK1	ITGA6	ITGA6	DDX49
GCA	GART	COG2	CLK2	ITGAL	ITGAL	DDX5
GCC2	GATAD2A	COG3	CLK3	ITGAM	ITGAM	DDX50
GCDH	GATAD2B	COG4	CLK4	ITGAX	ITGAX	DDX51
GCHFR	GATC	COG5	CLN5	ITGB1	ITGB1	DDX52
GCK	GATD1	COG6	CLN6	ITGB2	ITGB2	DDX53
GCLC	GBE1	COG7	CLN8	ITGB3	ITGB3	DDX54
GCLM	GBF1	COG8	CLNS1A	ITGB7	ITGB7	DDX55
GCN1	GBP1	COIL	CLP1	ITK	ITK	DDX56
GCSH	GBP2	COL12A1	CLPB	ITPA	ITPA	DDX58
GDI1	GBP4	COL1A1	CLPP	ITPKB	ITPKB	DDX59
GDI2	GBP5	COL4A2	CLPTM1	ITSN2	ITSN2	DDX6
GDPGP1	GCA	CERT1	CLPTM1L	IVD	IVD	DDX60
GEMIN4	GCC2	COL6A1	CLPX	IVNS1ABP	IVNS1ABP	DDX60L
GEMIN5	GCDH	COLEC11	CLSPN	JAK1	JAK1	DECR1
GEMIN6	GCHFR	COLGALT1	CLSTN1	JAK3	JAK3	DECR2
GEMIN7	GCK	COMMD1	CLTA	JAML	JAML	DEF6
GET4	GCLC	COMMD10	CLTB	JPT1	JPT1	DEFA1B
GFAP	GCLM	COMMD2	CLTC	JPT2	JPT2	DEGS1
GFER	GCN1	COMMD3	CLTCL1	JUNB	JUNB	DEK
GFM1	GCSH	COMMD3-BMI1	CLU	JUND	JUND	DENND10
GFM2	GDI1	COMMD4	CLUH	KARS1	KARS1	DENND11
GFPT1	GDI2	COMMD5	CLUH	KAT8	KAT8	DENND1C
GGA1	GDPGP1	COMMD6	CLUH	KATNA1	KATNA1	DENND2B
GGA2	GEMIN4	COMMD7	CLYBL	KCMF1	KCMF1	DENND2D
GGA3	GEMIN5	COMMD8	CMAS	KCNAB2	KCNAB2	DENND3
GGACT	GEMIN6	COMMD9	CMBL	KCTD12	KCTD12	DENND4A
GGCT	GEMIN7	COMT	CMC1	KCTD5	KCTD5	DENND4B
GGH	GET4	COMTD1	CMC2	KDM3B	KDM3B	DENND4C
GGPS1	GFAP	COPA	CMC4	KDSR	KDSR	DENND5A
GHITM	GFER	COPB1	CMIP	KHDRBS1	KHDRBS1	DENR
GID8	GFM1	COPB2	CMPK1	KHSRP	KHSRP	DEPDC1
GIGYF1	GFM2	COPE	CMPK2	KIAA0513	KIAA0513	DEPDC5
GIGYF2	GFPT1	COPG1	CMSS1	KIAA0930	KIAA0930	DEPTOR
GIMAP1	GGA1	COPG2	CMTM6	KIAA1143	KIAA1143	DERA
GIMAP2	GGA2	COPS2	CMTM7	KIAA1671	KIAA1671	DERL1
GIMAP4	GGACT	COPS3	CMTR1	KIF13B	KIF13B	DERL2
GIMAP5	GGCT	COPS4	CMTR2	KIF21A	KIF21A	DES
GIMAP7	GGPS1	COPS5	CNBP	KIF2A	KIF2A	DFFA
GIMAP8	GHITM	COPS6	CNBP	KIF3B	KIF3B	DFFB
GIPC1	GIGYF1	COPS7A	CNDP2	KIF5B	KIF5B	DGAT1
GIT1	GIGYF2	COPS7B	CNEP1R1	KIFBP	KIFBP	DGKA
GIT2	GIMAP1	COPS7B	CNIH4	KIR3DS1	KIR3DS1	DGKB
GK3P	GIMAP2	COPS8	CNN2	KLC1	KLC1	DGKE
GLB1	GIMAP4	COPZ1	CNN3	KLC2	KLC2	DGKI
GLE1	GIMAP5	COQ10A	CNNM3	KLC4	KLC4	DGKQ
GLG1	GIMAP7	COQ10B	CNNM4	KLHL11	KLHL11	DGKZ
GLIPR2	GIMAP8	COQ3	CNOT1	KLRB1	KLRB1	DGLUCY
GLMN	GINS4	COQ5	CNOT10	KPNA1	KPNA1	DGUOK
GLO1	GIPC1	COQ6	CNOT11	KPNA2	KPNA2	DHCR7
GLOD4	GIT1	COQ7	CNOT2	KPNA3	KPNA3	DHODH
GLRX	GIT2	COQ9	CNOT3	KPNA4	KPNA4	DHPS
GLRX3	GK3P	CORO1A	CNOT4	KPNA6	KPNA6	DHRS1
GLRX5	GLB1	CORO1A	CNOT6L	KPNB1	KPNB1	DHRS11
GLS	GLE1	CORO1B	CNOT7	KRAS	KRAS	DHRS4
GLTP	GLG1	CORO1C	CNOT8	KRT6B	KRT6B	DHRS7
GLUD1	GLIPR2	CORO2A	CNP	KTN1	KTN1	DHTKD1
GLYR1	GLMN	CORO2B	CNPY2	KYAT3	KYAT3	DHX15
GM2A	GLO1	CORO7	CNPY3	KYNU	KYNU	DHX16
GMDS	GLOD4	CORO7	CNPY4	L2HGDH	L2HGDH	DHX29
GMEB1	GLRX	COTL1	CNST	LACTB	LACTB	DHX30
GMEB2	GLRX3	COX11	CNTN1	LACTB2	LACTB2	DHX32
GMFB	GLRX5	COX15	CNTNAP1	LAIR1	LAIR1	DHX33
GMFG	GLS	COX17	CNTRL	LAMP1	LAMP1	DHX34
GMIP	GLTP	COX19	CNTROB	LAMP2	LAMP2	DHX35
GMPPA	GLUD1	COX20	COA1	LAMTOR1	LAMTOR1	DHX36
GMPPB	GLYR1	COX4I1	COA3	LAMTOR5	LAMTOR5	DHX37
GMPR2	GM2A	COX5A	COA4	LANCL2	LANCL2	DHX38
GMPS	GMDS	COX5B	COA5	LAP3	LAP3	DHX40
GNA13	GMEB1	COX6A1	COA6	LARP1	LARP1	DHX57
GNAI2	GMFB	COX6B1	COA7	LARP4	LARP4	DHX58
GNAI3	GMFG	COX6C	COASY	LARP7	LARP7	DHX8
GNAQ	GMIP	COX7A2	COBLL1	LARS1	LARS1	DHX9
GNAS	GMPPA	COX7A2L	COG1	LARS2	LARS2	DIABLO
GNB1	GMPPB	COX7C	COG2	LASP1	LASP1	DIAPH1
GNB1L	GMPR2	COX8A	COG3	LAT	LAT	DIAPH2
GNB2	GMPS	CP	COG4	LBR	LBR	DIAPH3
GNE	GNA13	CPB2	COG5	LCK	LCK	DIDO1
GNG2	GNAI2	CPD	COG6	LCMT1	LCMT1	DIMT1
GNG5	GNAI3	CPM	COG7	LCP1	LCP1	DIP2B
GNL1	GNAQ	CPN1	COG8	LCP2	LCP2	DIPK2A
GNL2	GNAS	CPN2	COIL	LDHA	LDHA	DIS3
GNL3	GNB1	CPNE1	COL12A1	LDHB	LDHB	DIS3L
GNPAT	GNB1L	CPNE2	COL18A1	LDLR	LDLR	DIS3L2
GNPDA1	GNB2	CPNE3	COL1A1	LDLRAP1	LDLRAP1	DKC1
GNPDA2	GNE	CPNE8	COL1A2	LEMD2	LEMD2	DLAT
GNPNAT1	GNG10	CPOX	COL2A1	LETM1	LETM1	DLD
GNS	GNG2	CPPED1	COL4A2	LGALS1	LGALS1	DLG1
GOLGA2	GNG5	CPQ	CERT1	LGALS3	LGALS3	DLG3
GOLGA3	GNL1	CPSF1	COL6A1	LGALS7	LGALS7	DLGAP4
GOLGA4	GNL2	CPSF2	COL6A3	LGALS8	LGALS8	DLST
GOLGA7	GNL3	CPSF3	COL9A2	LGALS9	LGALS9	DMAC2
GOLGB1	GNL3L	INTS11	COLEC11	LGALSL	LGALSL	DMAC2L
GOLPH3	GNPAT	CPSF4	COLGALT1	LHPP	LHPP	DMAP1
GOLPH3L	GNPDA1	CPSF6	COMMD1	LIG1	LIG1	DMKN
GOLT1B	GNPDA2	CPSF7	COMMD10	LILRA3	LILRA3	DMPK
GON7	GNPNAT1	CPT1A	COMMD2	LILRB2	LILRB2	DMXL1
GOPC	GNS	CPT2	COMMD3	LIMA1	LIMA1	DMXL2
GORASP2	GOLGA2	CPTP	COMMD3-BMI1	LIMD1	LIMD1	DNAAF1
GOSR1	GOLGA3	CPVL	COMMD4	LIMD2	LIMD2	DNAAF5
GOSR2	GOLGA4	CR1	COMMD5	LIMS1	LIMS1	DNAH1
GOT1	GOLGA5	CR2	COMMD6	LIN7C	LIN7C	DNAH10
GOT2	GOLGA7	CRACR2A	COMMD7	LIX1L	LIX1L	DNAH11
GPA33	GOLGB1	CRADD	COMMD8	LMAN1	LMAN1	DNAH12
GPALPP1	GOLPH3	CRAT	COMMD9	LMAN2	LMAN2	DNAH17
GPATCH1	GOLPH3L	CRBN	COMT	LMNA	LMNA	DNAH5
GPATCH11	GOLT1B	CREB1	COMTD1	LMNB1	LMNB1	DNAH7
GPATCH8	GON7	CREBBP	COPA	LMNB2	LMNB2	DNAH8
GPBP1	GOPC	CREBRF	COPB1	LNPEP	LNPEP	DNAJA1
GPD1L	GORASP2	CREG1	COPB2	LONP1	LONP1	DNAJA2
GPD2	GOSR1	CRELD1	COPE	LPP	LPP	DNAJA3
GPHN	GOSR2	CRELD2	COPG1	LPXN	LPXN	DNAJA4
GPI	GOT1	CRIP1	COPG2	LRBA	LRBA	DNAJB1
GPKOW	GOT2	CRIP2	COPS2	LRCH1	LRCH1	DNAJB11
GPN1	GPA33	CRIPT	COPS3	LRCH3	LRCH3	DNAJB12
GPN3	GPALPP1	CRISP3	COPS4	LRCH4	LRCH4	DNAJB2
GPR171	GPATCH1	CRISPLD2	COPS5	LRP1	LRP1	DNAJB4
GPR183	GPATCH11	CRK	COPS6	LRPAP1	LRPAP1	DNAJB5
GPR89B	GPATCH4	CRKL	COPS7A	LRPPRC	LRPPRC	DNAJB6
GPRIN3	GPATCH8	CRLF2	COPS7B	LRRC25	LRRC25	DNAJB7
GPS1	GPBP1	CRLF3	COPS7B	LRRC40	LRRC40	DNAJC10
GPS2	GPD1L	CRLF3	COPS8	LRRC47	LRRC47	DNAJC11
GPSM3	GPD2	CRNKL1	COPZ1	LRRC58	LRRC58	DNAJC13
GPX1	GPHN	CROCC	COQ10B	LRRC59	LRRC59	DNAJC17
GPX4	GPI	CROT	COQ3	LRRC8C	LRRC8C	DNAJC19
GPX7	GPKOW	CRTAC1	COQ5	LRRFIP1	LRRFIP1	DNAJC2
GRAP	GPN1	CRTAP	COQ6	LRRFIP2	LRRFIP2	DNAJC21
GRAP2	GPN3	CRTC1	COQ7	LRSAM1	LRSAM1	DNAJC25
GRB2	GPR171	CRTC2	COQ9	LSG1	LSG1	DNAJC3
GRHPR	GPR183	CRTC2	CORO1A	LSM12	LSM12	DNAJC30
GRID2	GPR89B	CRTC3	CORO1A	LSM14A	LSM14A	DNAJC5
GRIPAP1	GPRIN3	CRYBG3	CORO1B	LSM14B	LSM14B	DNAJC7
GRK2	GPS1	CRYL1	CORO1C	LSM2	LSM2	DNAJC8
GRK5	GPS2	CRYM	CORO2A	LSM3	LSM3	DNAJC9
GRK6	GPSM3	CRYZ	CORO7	LSM4	LSM4	DNASE2
GRN	GPX1	CRYZL1	COTL1	LSM8	LSM8	DNHD1
GRPEL1	GPX4	CS	COX11	LSP1	LSP1	DNLZ
GRSF1	GPX7	CSDE1	COX15	LTA4H	LTA4H	DNM1L
GRWD1	GRAMD1A	CSE1L	COX17	LTBP1	LTBP1	DNM2
GSDMD	GRAP	CSF1R	COX18	LTF	LTF	DNM2
GSK3A	GRAP2	CSF2RA	COX19	LTV1	LTV1	DNMBP
GSK3B	GRB2	CSF2RB	COX20	LUC7L	LUC7L	DNMT1
GSPT1	GRHPR	CSF3R	COX4I1	LUC7L2	LUC7L2	DNMT3A
GSPT2	GRID2	CSGALNACT1	COX5A	LY75	LY75	DNPEP
GSR	GRIPAP1	CSGALNACT2	COX5B	LY9	LY9	DNTTIP1
GSS	GRK2	CSK	COX6A1	LYN	LYN	DNTTIP2
GSTK1	GRK5	CSNK1A1	COX6B1	LYPLA1	LYPLA1	DOCK1
GSTM1	GRK6	CSNK1D	COX6C	LYPLA2	LYPLA2	DOCK10
GSTM2	GRN	CSNK1G1	COX7A2	LYPLAL1	LYPLAL1	DOCK11
GSTM3	GRPEL1	CSNK1G2	COX7A2L	LYSMD2	LYSMD2	DOCK2
GSTO1	GRSF1	CSNK2A1	COX7C	LYZ	LYZ	DOCK3
GSTP1	GRWD1	CSNK2A2	COX8A	LZIC	LZIC	DOCK8
GSTT1	GSDMD	CSNK2B	CP	LZTFL1	LZTFL1	DOCK9
GTF2A1	GSK3A	CSRP1	CPA3	M6PR	M6PR	DOHH
GTF2B	GSK3B	CST3	CPB2	MACF1	MACF1	DOK1
GTF2E1	GSPT1	CSTA	CPD	MACROH2A1	MACROH2A1	DOK2
GTF2E2	GSPT2	CSTB	CPEB4	MAD1L1	MAD1L1	DOK3
GTF2F1	GSR	CSTF1	CPM	MAEA	MAEA	DOK6
GTF2F2	GSS	CSTF2	CPN1	MAGEB2	MAGEB2	DOP1B
GTF2H1	GSTK1	CSTF2T	CPN2	MAGOH	MAGOH	DPAGT1
GTF2H2C_2	GSTM1	CSTF3	CPNE1	MAGOHB	MAGOHB	DPEP3
GTF2H3	GSTM2	MIA2	CPNE2	MAGT1	MAGT1	DPF2
GTF2H4	GSTM3	CTBP1	CPNE3	MALSU1	MALSU1	DPH1
GTF2I	GSTO1	CTBS	CPNE6	MALT1	MALT1	DPH2
GTF3A	GSTP1	CTC1	CPNE8	MAN2B1	MAN2B1	DPH5
GTF3C1	GSTT1	CTCF	CPOX	MANF	MANF	DPM1
GTF3C2	GTF2A1	CTDNEP1	CPPED1	MAOB	MAOB	DPM3
GTF3C3	GTF2B	CTDP1	CPQ	MAP1S	MAP1S	DPP10
GTF3C4	GTF2E1	CTDSP1	CPSF1	MAP2K1	MAP2K1	DPP3
GTF3C5	GTF2E2	CTDSP2	CPSF2	MAP2K2	MAP2K2	DPP4
GTPBP1	GTF2F1	CTDSPL	CPSF3	MAP2K3	MAP2K3	DPP7
GTPBP3	GTF2F2	CTDSPL2	INTS11	MAP2K4	MAP2K4	DPP8
GTPBP4	GTF2H1	CTH	CPSF4	MAP2K6	MAP2K6	DPP9
GTPBP6	GTF2H2C_2	CTNNA1	CPSF6	MAP3K2	MAP3K2	DPY30
GUK1	GTF2H3	CTNNA2	CPSF7	MAP3K4	MAP3K4	DPYD
GUSB	GTF2H4	CTNNBL1	CPT1A	MAP3K7	MAP3K7	DPYSL2
GYG1	GTF2I	CTNND1	CPT2	MAP4	MAP4	DPYSL5
GYPC	GTF3A	CTPS1	CPTP	MAP4K1	MAP4K1	DR1
GYS1	GTF3C1	CTPS2	CPVL	MAP4K2	MAP4K2	DRAP1
GZMA	GTF3C2	CTR9	CR1	MAP4K5	MAP4K5	DRG1
GZMB	GTF3C3	CTSA	CR2	MAP7D1	MAP7D1	DRG2
GZMK	GTF3C4	CTSB	CRACR2A	MAPK1	MAPK1	DRP2
GZMM	GTF3C5	CTSC	CRAT	MAPK13	MAPK13	DSC1
H1F0	GTPBP1	CTSD	CRBN	MAPK14	MAPK14	DSC2
H1FX	GTPBP3	CTSF	CREB1	MAPK3	MAPK3	DSEL
H2AFX	GTPBP4	CTSG	CREBBP	MAPK9	MAPK9	DSG1
H2AFY	GTPBP6	CTSH	CREBRF	MAPKAPK2	MAPKAPK2	DSN1
H2AFY2	GUK1	CTSL	CREG1	MAPKAPK3	MAPKAPK3	DSP
H2AFZ	GUSB	CTSS	CRELD1	MAPRE1	MAPRE1	DST
H3F3B	GYG1	CTSW	CRELD2	MAPRE2	MAPRE2	DSTN
H6PD	GYPC	CTSZ	CREM	MARCKS	MARCKS	DTD1
HABP4	GYS1	CTTN	CREM	MARCKSL1	MARCKSL1	DTNBP1
HACD2	GZMA	CTTNBP2NL	CRIP1	MARK2	MARK2	DTWD2
HACD3	GZMB	CTU1	CRIP2	MARK3	MARK3	DTX3
HADH	GZMM	CTU2	CRIPT	MARS1	MARS1	DTX3L
HADHA	H1F0	CUEDC2	CRISP3	MASP1	MASP1	DTYMK
HADHB	H1FX	CUL1	CRK	MAST3	MAST3	DUS1L
HAGH	H2AFX	CUL2	CRKL	MAST4	MAST4	DUS3L
HARS	H2AFY	CUL3	CRLF3	MAT2A	MAT2A	DUSP11
HARS2	H2AFZ	CUL4A	CRMP1	MAT2B	MAT2B	DUSP12
HAT1	H3F3B	CUL4B	CRNKL1	MATR3	MATR3	DUSP21
HAUS3	H6PD	CUL5	CROCC	MAVS	MAVS	DUSP22
HAUS5	HABP4	CUL9	CROT	MAX	MAX	DUSP23
HAUS6	HACD2	CUTA	CRTAC1	MBLAC2	MBLAC2	DUSP28
HAUS8	HACD3	CUTC	CRTAM	MBNL1	MBNL1	DUSP3
HBA2	HADH	CUX1	CRTAP	MBOAT7	MBOAT7	DUT
HBB	HADHA	CUX1	CRTC1	MCAT	MCAT	DVL2
HBS1L	HADHB	CWC15	CRTC2	MCCC1	MCCC1	DVL3
HCCS	HAGH	CWC22	CRTC3	MCCC2	MCCC2	DYNC1H1
HCFC1	HARS	CWC25	CRYBG3	MCEE	MCEE	DYNC1I2
HCLS1	HARS2	CWC27	CRYL1	MCEMP1	MCEMP1	DYNC1LI1
HDAC1	HAT1	CWF19L1	CRYM	MCL1	MCL1	DYNC1LI2
HDAC2	HAUS3	CWF19L2	CRYZ	MCM2	MCM2	DYNC2H1
HDAC3	HAUS5	CX3CL1	CRYZL1	MCM3	MCM3	DYNLL1
HDAC4	HAUS6	CXCR1	CS	MCM4	MCM4	DYNLL2
HDAC6	HAUS8	CXCR4	CSDE1	MCM5	MCM5	DYNLRB1
HDAC7	HAX1	CXorf38	CSE1L	MCM6	MCM6	DYNLT3
HDDC2	HBA2	CXorf56	CSF1R	MCM7	MCM7	DYRK1A
HDDC3	HBB	CXXC1	CSF2RA	MCM9	MCM9	DYRK1B
HDGF	HBS1L	CYB561D2	CSGALNACT2	MCMBP	MCMBP	DYRK3
HDGFL2	HCCS	CYB5A	CSK	MCTS1	MCTS1	E2F4
HDGFL3	HCFC1	CYB5B	CSNK1A1	MCU	MCU	E4F1
HDHD2	HCLS1	CYB5B	CSNK1D	MCUR1	MCUR1	EAPP
HDHD3	HDAC1	CYB5R1	CSNK1E	MDH1	MDH1	EARS2
HDHD5	HDAC2	CYB5R2	CSNK1G1	MDH2	MDH2	EBNA1BP2
HDLBP	HDAC3	CYB5R3	CSNK1G2	ME1	ME1	EBP
HEATR1	HDAC4	CYB5R4	CSNK1G3	ME2	ME2	ECE1
HEATR3	HDAC7	CYBA	CSNK2A1	MECP2	MECP2	ECE2
HEATR5B	HDDC2	CYBB	CSNK2A2	MECR	MECR	ECH1
HEBP1	HDDC3	CYBRD1	CSNK2B	MEF2D	MEF2D	ECHDC1
HEBP2	HDGF	CYC1	CSRP1	MEFV	MEFV	ECHDC2
HECA	HDGFL2	CYCS	CSRP2	MEMO1	MEMO1	ECHS1
HECTD1	HDGFL3	CYFIP1	CST7	MEPCE	MEPCE	ECI1
HECTD3	HDHD2	CYFIP2	CSTA	MESD	MESD	ECI2
HELZ2	HDHD3	CYHR1	CSTB	METAP1	METAP1	ECM1
HERC4	HDHD5	CYLD	CSTF1	METAP2	METAP2	ECPAS
HERC6	HDLBP	CYP1B1	CSTF2	METTL14	METTL14	ECSIT
HEXA	HEATR1	CYP20A1	CSTF2T	METTL15	METTL15	ECT2
HEXB	HEATR3	CYP27A1	CSTF3	METTL16	METTL16	ECT2L
HEXIM1	HEATR5B	CYP2S1	MIA2	METTL26	METTL26	EDC3
HGH1	HEBP1	CYP2U1	CTBP1	METTL2B	METTL2B	EDC4
HGS	HEBP2	CYP4F3	CTBP2	METTL3	METTL3	EDF1
HIBADH	HECA	CYP51A1	CTBS	MFF	MFF	EEA1
HIBCH	HECTD1	CYTH1	CTC1	MFN2	MFN2	EED
HIF1AN	HECTD3	CYTH2	CTCF	MGMT	MGMT	EEF1A1
HIGD2A	HELLS	CYTH4	CTDP1	MIA2	MIA2	EEF1A2
HIKESHI	HELZ2	CYTIP	CTDSP1	MIA3	MIA3	EEF1AKMT2
HINT1	HERC4	D2HGDH	CTDSP2	MICAL1	MICAL1	EEF1AKNMT
HINT2	HERC5	DAAM1	CTDSPL	MIEN1	MIEN1	EEF1B2
HIP1R	HERC6	DAB2	CTDSPL2	MIER1	MIER1	EEF1D
HIRIP3	HEXA	DAD1	CTH	MIF	MIF	EEF1D
HIST1H1B	HEXB	DAG1	CTIF	MIF4GD	MIF4GD	EEF1E1
HIST1H1C	HEXIM1	DAGLB	CTLA4	MINDY1	MINDY1	EEF1G
HIST1H1D	HGH1	TKFC	CTNNA1	MKI67	MKI67	EEF2
HIST1H1E	HGS	DAP	CTNNB1	MKLN1	MKLN1	EEF2K
HIST1H2AC	HIBADH	DAP3	CTNNBIP1	MKRN2	MKRN2	EEFSEC
HIST1H2BI	HIBCH	DAPK1	CTNNBL1	MLEC	MLEC	EFCAB2
HIST1H3J	HIF1AN	DAPK2	CTNND1	MLF2	MLF2	EFCAB6
HIST2H2AA4	HIGD1A	DAPK3	CTPS1	MLH1	MLH1	EFEMP1
HIST2H2AB	HIGD2A	DAPP1	CTPS2	MLKL	MLKL	EFHD1
HIST2H2AC	HIKESHI	DARS1	CTR9	MMAA	MMAA	EFHD2
HIST2H2BD	HINT1	DARS2	CTSA	MMAB	MMAB	EFL1
HIST2H2BE	HINT2	DAXX	CTSB	MMRN1	MMRN1	EFR3A
HIST2H2BF	HIP1R	DAZAP1	CTSC	MMUT	MMUT	EFR3B
HIST2H3D	HIRIP3	DAZAP2	CTSD	MNDA	MNDA	EFTUD2
HIST2H3PS2	HIST1H1B	DAZAP2	CTSF	MOB1A	MOB1A	EGFR
HIST4H4	HIST1H1C	DBI	CTSG	MOB2	MOB2	EGLN1
HK1	HIST1H1D	DBN1	CTSH	MOB3A	MOB3A	EHBP1L1
HK2	HIST1H1E	DBNL	CTSS	MOB4	MOB4	EHD1
HK3	HIST1H2AC	DBNL	CTSW	MOCS3	MOCS3	EHD3
HLA-A	HIST1H2BI	DBP	CTSZ	MPDU1	MPDU1	EHD4
HLA-B	HIST1H3J	DBR1	CTTN	MPEG1	MPEG1	EHMT1
HLA-C	HIST2H2AA4	DBT	CTTNBP2NL	MPI	MPI	EHMT2
HLA-DPA1	HIST2H2AB	DCAF11	CTU1	MPO	MPO	EI24
HLA-DPB1	HIST2H2BD	DCAF13	CTU2	MPP1	MPP1	EIF1
HLA-DQB1	HIST2H2BE	DCAF15	CUEDC1	MPP6	MPP6	EIF1AD
HLA-DRA	HIST2H2BF	DCAF5	CUEDC2	MPST	MPST	EIF1AX
HLA-DRB1	HIST2H3D	DCAF6	CUL1	MRE11	MRE11	EIF1AY
HLA-DRB5	HIST2H3PS2	DCAF7	CUL2	MRFAP1	MRFAP1	EIF1B
HLA-E	HIST4H4	DCAF8	CUL3	MRI1	MRI1	EIF2A
HLA-F	HK1	DCAKD	CUL4A	MRM3	MRM3	EIF2AK2
HLA-G	HK2	DCD	CUL4B	MRPL1	MRPL1	EIF2AK4
HLA-H	HK3	DCK	CUL5	MRPL11	MRPL11	EIF2B1
HM13	HLA-A	DCLRE1C	CUL9	MRPL12	MRPL12	EIF2B2
HMBS	HLA-B	DCP1A	CUTA	MRPL13	MRPL13	EIF2B3
HMCES	HLA-C	DCP1B	CUTC	MRPL18	MRPL18	EIF2B4
HMG20A	HLA-DPA1	DCP2	CUX1	MRPL19	MRPL19	EIF2B5
HMGA1	HLA-DPB1	DCPS	CUX1	MRPL2	MRPL2	EIF2D
HMGB1	HLA-DQB1	DCTD	CWC15	MRPL21	MRPL21	EIF2S1
HMGB2	HLA-DRA	DCTN1	CWC22	MRPL22	MRPL22	EIF2S2
HMGB3	HLA-DRB1	DCTN2	CWC25	MRPL24	MRPL24	EIF2S3
HMGCL	HLA-DRB5	DCTN3	CWC27	MRPL28	MRPL28	EIF3A
HMGCS1	HLA-E	DCTN4	CWF19L1	MRPL3	MRPL3	EIF3B
HMGN1	HLA-F	DCTN5	CWF19L2	MRPL37	MRPL37	EIF3C
HMGN2	HLA-G	DCTN6	CXCL1	MRPL38	MRPL38	EIF3D
HMGN3	HLA-H	DCTPP1	CXCL3	MRPL39	MRPL39	EIF3E
HMGN4	HM13	DCUN1D1	CXCL5	MRPL4	MRPL4	EIF3F
HMGXB4	HMBS	DCUN1D3	CXCR2	MRPL44	MRPL44	EIF3G
HMOX2	HMCES	DCUN1D4	CXCR3	MRPL46	MRPL46	EIF3H
HNRNPA0	HMG20A	DCUN1D5	CXCR4	MRPL47	MRPL47	EIF3I
HNRNPA1	HMGA1	DCXR	CXorf38	MRPL48	MRPL48	EIF3J
HNRNPA2B1	HMGB1	DDA1	CXorf56	MRPL9	MRPL9	EIF3K
HNRNPA3	HMGB2	DDAH1	CXXC1	MRPS15	MRPS15	EIF3L
HNRNPAB	HMGB3	DDAH2	CXXC5	MRPS16	MRPS16	EIF3M
HNRNPC	HMGCL	DDB1	CYB561D2	MRPS18B	MRPS18B	EIF4A1
HNRNPD	HMGCS1	DDB2	CYB5A	MRPS22	MRPS22	EIF4A2
HNRNPF	HMGN1	DDHD1	CYB5B	MRPS23	MRPS23	EIF4A3
HNRNPH1	HMGN2	DDHD2	CYB5B	MRPS26	MRPS26	EIF4B
HNRNPH2	HMGN3	DDI2	CYB5R1	MRPS27	MRPS27	EIF4E
HNRNPH3	HMGN4	DDOST	CYB5R2	MRPS28	MRPS28	EIF4E2
HNRNPK	HMGXB4	DDRGK1	CYB5R3	MRPS31	MRPS31	EIF4E3
HNRNPL	HMMR	DDT	CYB5R4	MRPS35	MRPS35	EIF4EBP1
HNRNPLL	HMOX2	DDX1	CYBA	MRPS6	MRPS6	EIF4EBP2
HNRNPM	HNRNPA0	DDX10	CYBB	MRPS7	MRPS7	EIF4EBP3
HNRNPR	HNRNPA1	DDX11	CYC1	MRPS9	MRPS9	EIF4ENIF1
HNRNPU	HNRNPA2B1	DDX17	CYCS	MRRF	MRRF	EIF4G1
HNRNPUL1	HNRNPA3	DDX18	CYFIP1	MRTO4	MRTO4	EIF4G2
HNRNPUL2	HNRNPAB	DDX19A	CYFIP2	MSH2	MSH2	EIF4H
HOOK1	HNRNPC	DDX19B	CYHR1	MSH6	MSH6	EIF5
HOOK3	HNRNPD	DDX20	CYLD	MSI2	MSI2	EIF5A
HP1BP3	HNRNPF	DDX21	CYP1A1	MSN	MSN	EIF5B
HPCAL1	HNRNPH1	DDX23	CYP1B1	MSTO1	MSTO1	EIF6
HPCAL4	HNRNPH2	DDX24	CYP20A1	MTA2	MTA2	EIPR1
HPF1	HNRNPH3	INTS6L	CYP27A1	MTAP	MTAP	ELAC2
HPRT1	HNRNPK	DDX27	CYP2S1	MTCH2	MTCH2	ELANE
HPS6	HNRNPL	DDX28	CYP2U1	MT-CO2	MT-CO2	ELAVL1
HS1BP3	HNRNPLL	DDX31	CYP4F12	MTDH	MTDH	ELF1
HSBP1	HNRNPM	DDX39A	CYP4F3	MTFR1L	MTFR1L	ELF2
HSD17B10	HNRNPR	DDX39B	CYP51A1	MTHFD1	MTHFD1	ELF4
HSD17B11	HNRNPU	DDX39B	CYSLTR1	MTHFD1L	MTHFD1L	ELK3
HSD17B12	HNRNPUL1	DDX3X	CYSTM1	MTHFD2	MTHFD2	ELK4
HSD17B4	HNRNPUL2	DDX3Y	CYTH1	MTHFS	MTHFS	ELL
HSD17B7	HOOK1	DDX41	CYTH2	MTIF2	MTIF2	ELMO1
HSD17B8	HOOK3	DDX42	CYTH4	MTM1	MTM1	ELMO2
HSDL1	HP	DDX46	CYTIP	MTMR6	MTMR6	ELMOD2
HSDL2	HP1BP3	DDX46	D2HGDH	MTO1	MTO1	ELOA
HSF1	HPCAL1	DDX47	DAAM1	MTOR	MTOR	ELOB
HSH2D	HPDL	DDX49	DAB2	MTPN	MTPN	ELOC
HSP90AA1	HPF1	DDX5	DAD1	MTR	MTR	ELOVL1
HSP90AB1	HPRT1	DDX50	DAG1	MTREX	MTREX	ELOVL5
HSP90AB2P	HPS6	DDX51	DAGLB	MVD	MVD	ELP1
HSP90AB4P	HS1BP3	DDX52	TKFC	MVP	MVP	ELP2
HSP90B1	HSBP1	DDX54	DAND5	MX1	MX1	ELP3
HSPA14	HSD17B10	DDX55	DAP	MX2	MX2	ELP4
HSPA1B	HSD17B11	DDX56	DAP3	MXRA7	MXRA7	EMB
HSPA2	HSD17B12	DDX58	DAPK1	MYCBP	MYCBP	EMC1
HSPA4	HSD17B4	DDX59	DAPK2	MYD88	MYD88	EMC10
HSPA5	HSD17B7	DDX6	DAPK3	MYDGF	MYDGF	EMC2
HSPA6	HSD17B8	DDX60	DAPP1	MYG1	MYG1	EMC3
HSPA8	HSDL1	DDX60L	DARS1	MYH10	MYH10	EMC4
HSPA9	HSDL2	DEAF1	DARS2	MYH14	MYH14	EMC7
HSPB1	HSF1	DECR1	DAXX	MYH9	MYH9	EMC8
HSPB11	HSH2D	DECR2	DAZAP1	MYL1	MYL1	EMD
HSPBP1	HSP90AA1	DEF6	DBI	MYL12A	MYL12A	EMG1
HSPD1	HSP90AB1	DEFA3	DBN1	MYL6	MYL6	EMILIN1
HSPE1	HSP90AB2P	DEFA4	DBNL	MYL9	MYL9	EML2
HSPH1	HSP90AB4P	DEGS1	DBNL	MYLK	MYLK	EML3
HTATIP2	HSP90B1	DEK	DBR1	MYO10	MYO10	EML4
HTATSF1	HSPA13	DENND1A	DBT	MYO18A	MYO18A	EML5
HTRA2	HSPA14	DENND1C	DCAF11	MYO1E	MYO1E	EML6
HTT	HSPA1B	DENND2C	DCAF13	MYO1F	MYO1F	EMP3
HUS1	HSPA1L	DENND2D	DCAF16	MYO1G	MYO1G	EMSY
HUWE1	HSPA2	DENND2D	DCAF5	MYO5A	MYO5A	ENAH
HVCN1	HSPA4	DENND3	DCAF6	MYO9B	MYO9B	ENDOD1
HYI	HSPA5	DENND4A	DCAF7	MYOF	MYOF	ENDOG
HYOU1	HSPA6	DENND4B	DCAF8	MYSM1	MYSM1	ENGASE
HYPK	HSPA8	DENND4C	DCAKD	N4BP1	N4BP1	ENO1
IAH1	HSPA9	DENND5B	DCD	NAA10	NAA10	ENO1
IARS	HSPB1	DENND6A	DCK	NAA15	NAA15	ENO2
IARS2	HSPB11	DENR	DCP1A	NAA16	NAA16	ENO3
IBA57	HSPBP1	DEPDC5	DCP1B	NAA30	NAA30	ENOPH1
ICAM1	HSPD1	DEPTOR	DCP2	NAA50	NAA50	ENOSF1
ICAM2	HSPE1	DERA	DCPS	NAA80	NAA80	ENOX2
ICAM3	HSPH1	DERL1	DCTD	NAAA	NAAA	ENPP4
IDE	HTATIP2	DERL2	DCTN1	NAB2	NAB2	ENSA
IDH1	HTATSF1	DERL3	DCTN2	NACA	NACA	ENTPD4
IDH2	HTRA2	DESI1	DCTN3	NACC1	NACC1	ENTR1
IDH3A	HTT	DFFA	DCTN4	NADK	NADK	ENY2
IDH3B	HUWE1	DFFB	DCTN5	NADK2	NADK2	EP300
IDH3G	HVCN1	DGAT1	DCTN6	NAE1	NAE1	EP400
IDI1	HYI	ESS2	DCTPP1	NAGA	NAGA	EPB41
IDNK	HYOU1	DGCR8	DCUN1D1	NAGK	NAGK	EPB41L2
IDO1	HYPK	DGKA	DCUN1D5	NAMPT	NAMPT	EPB41L3
IDUA	IAH1	DGKB	DCXR	NANS	NANS	EPB41L5
IFI16	IARS	DGKE	DDA1	NAP1L1	NAP1L1	EPC1
IFI30	IARS2	DGKG	DDAH1	NAP1L4	NAP1L4	EPC2
IFI35	IBA57	DGKH	DDAH2	NAPA	NAPA	EPG5
IFI44	ICAM1	DGKQ	DDB1	NAPG	NAPG	EPHA1
IFIH1	ICAM2	DGKZ	DDB2	NAPRT	NAPRT	EPHX1
IFIT1	ICAM3	DGUOK	DDHD1	NARS1	NARS1	EPHX2
IFIT3	ICOS	DHCR24	DDHD2	NASP	NASP	EPM2AIP1
IFIT5	IDE	DHCR7	DDI2	NAXD	NAXD	EPN1
IFITM1	IDH1	DHDDS	DDIT4	NAXE	NAXE	EPPK1
IFRD2	IDH2	DHFR	DDOST	NBEAL2	NBEAL2	EPRS1
IFT27	IDH3A	DHODH	DDRGK1	NCAM1	NCAM1	EPS15
IGBP1	IDH3B	DHPS	DDT	NCBP1	NCBP1	EPS15L1
IGF2R	IDH3G	DHRS1	DDX1	NCBP2	NCBP2	EPS8
IGHA1	IDI1	DHRS11	DDX10	NCEH1	NCEH1	EPS8L1
IGHG1	IDNK	DHRS13	DDX11	NCF1	NCF1	EPS8L2
IGKC	IDO1	DHRS2	DDX12P	NCF2	NCF2	EPX
IGLC6	IER3IP1	DHRS3	DDX17	NCF4	NCF4	ERAL1
IGSF8	IFI16	DHRS4	DDX18	NCK1	NCK1	ERAP1
IK	IFI30	DHRS7	DDX19A	NCK2	NCK2	ERAP2
IKBKB	IFI35	DHRS7B	DDX20	NCKAP1L	NCKAP1L	ERBIN
IKBKE	IFI44	DHTKD1	DDX21	NCL	NCL	ERC1
IKBKG	IFI44L	DHX15	DDX23	NCLN	NCLN	ERCC1
IKZF1	IFIH1	DHX16	DDX24	NCOA3	NCOA3	ERCC2
IKZF3	IFIT1	DHX29	INTS6L	NCOA7	NCOA7	ERCC3
IL16	IFIT2	DHX30	DDX27	NCSTN	NCSTN	ERCC4
IL18R1	IFIT3	DHX33	DDX28	NDE1	NDE1	ERCC5
IL2RA	IFIT5	DHX34	DDX31	NDRG1	NDRG1	ERCC6
IL2RG	IFITM1	DHX35	DDX39A	NDRG2	NDRG2	ERF
IL4I1	IFNG	DHX36	DDX39A	NDRG3	NDRG3	ERG
IL7R	IFRD2	DHX37	DDX39B	NDUFA10	NDUFA10	ERG28
ILF2	IFT27	DHX38	DDX39B	NDUFA11	NDUFA11	ERGIC1
ILF3	IGBP1	DHX40	DDX3X	NDUFA12	NDUFA12	ERH
ILK	IGF2R	DHX57	DDX3Y	NDUFA4	NDUFA4	ERI1
ILKAP	IGHA1	DHX58	DDX41	NDUFA5	NDUFA5	ERI2
ILVBL	IGHG1	DHX8	DDX42	NDUFA6	NDUFA6	ERI3
IMMT	IGHG2	DHX9	DDX46	NDUFA7	NDUFA7	ERICH1
IMP3	IGHG3	DIABLO	DDX46	NDUFA8	NDUFA8	ERICH6
IMP4	IGKC	DIAPH1	DDX47	NDUFAF2	NDUFAF2	ERICH6B
IMPA1	IGLC6	DIAPH2	DDX49	NDUFAF3	NDUFAF3	ERLEC1
IMPAD1	IGSF8	DIAPH3	DDX5	NDUFAF4	NDUFAF4	ERLIN1
IMPDH1	IK	DICER1	DDX50	NDUFB10	NDUFB10	ERLIN2
IMPDH2	IKBKB	DIDO1	DDX51	NDUFB11	NDUFB11	ERMP1
INF2	IKBKE	UTP25	DDX52	NDUFB4	NDUFB4	ERN1
ING1	IKBKG	DIMT1	DDX54	NDUFB8	NDUFB8	ERO1A
ING3	IKZF1	DIP2A	DDX54	NDUFB9	NDUFB9	ERO1B
INIP	IKZF3	DIP2B	DDX55	NDUFS1	NDUFS1	ERP29
INPP1	IL16	DIS3	DDX56	NDUFS2	NDUFS2	ERP44
INPP4A	IL17F	DIS3L	DDX58	NDUFS3	NDUFS3	ESD
INPP4B	IL18R1	DIS3L2	DDX59	NDUFS4	NDUFS4	ESF1
INPP5B	IL2RA	DISC1	DDX6	NDUFS7	NDUFS7	ESPL1
INPP5D	IL2RG	DIXDC1	DDX60	NDUFS8	NDUFS8	ESPN
INPP5K	IL32	DKC1	DDX60L	NDUFV1	NDUFV1	ESS2
INPPL1	IL4I1	DKFZp686J1372	DEAF1	NDUFV2	NDUFV2	ESYT1
INTS1	ILF2	DLAT	DECR1	NECAP1	NECAP1	ESYT1
INTS10	ILF3	DLD	DECR2	NECAP2	NECAP2	ESYT2
INTS11	ILK	DLG1	DEF6	NEDD8	NEDD8	ETAA1
INTS12	ILKAP	DLG3	DEFA3	NEK7	NEK7	ETF1
INTS13	ILVBL	DLG5	DEGS1	NEK9	NEK9	ETFA
INTS14	IMMT	DLGAP4	DEK	NELFA	NELFA	ETFB
INTS2	IMP3	DLGAP5	DENND1A	NELFE	NELFE	ETFDH
INTS3	IMP4	DLST	DENND1C	NEMP1	NEMP1	ETFRF1
INTS4	IMPA1	DMAP1	DENND2D	NENF	NENF	ETHE1
INTS5	IMPAD1	DMBT1	DENND2D	NES	NES	ETNK1
INTS6	IMPDH1	DMD	DENND3	NFAT5	NFAT5	ETS1
INTS7	IMPDH2	DMTN	DENND4A	NFATC1	NFATC1	ETV3
INTS8	INCENP	DMXL1	DENND4B	NFATC2	NFATC2	ETV6
INTS9	INF2	DMXL2	DENND4C	NFATC2IP	NFATC2IP	EVI2B
IPCEF1	ING1	DNA2	DENND5A	NFATC3	NFATC3	EVI5L
IPO11	ING3	DNAAF2	DENND5B	NFKB1	NFKB1	EVL
IPO4	INIP	DNAJA1	DENND6A	NFKB2	NFKB2	EVPL
IPO5	INPP1	DNAJA2	DENR	NFKBIA	NFKBIA	EWSR1
IPO7	INPP4A	DNAJA3	DEPDC5	NFKBIB	NFKBIB	EWSR1
IPO8	INPP4B	DNAJA4	DEPTOR	NFKBIE	NFKBIE	EXD2
IPO9	INPP5B	DNAJB1	DERA	NFS1	NFS1	EXOC1
IQGAP1	INPP5D	DNAJB11	DERL1	NFYC	NFYC	EXOC2
IQGAP2	INPP5K	DNAJB11	DERL2	NGLY1	NGLY1	EXOC3
IRAK4	INPPL1	DNAJB12	DESI1	NHLRC2	NHLRC2	EXOC3L4
IREB2	INTS1	DNAJB14	DFFA	NHSL2	NHSL2	EXOC4
IRF2	INTS10	DNAJB2	GSDME	NIBAN1	NIBAN1	EXOC5
IRF2BP1	INTS11	DNAJB4	DGAT1	NIBAN2	NIBAN2	EXOC6
IRF2BP2	INTS12	DNAJB6	DGAT2	NID1	NID1	EXOC6B
IRF2BPL	INTS13	DNAJC1	ESS2	NIF3L1	NIF3L1	EXOC7
IRF3	INTS14	DNAJC10	DGCR8	NIPSNAP1	NIPSNAP1	EXOC8
IRF4	INTS2	DNAJC11	DGKA	NIPSNAP2	NIPSNAP2	EXOG
IRF9	INTS3	DNAJC13	DGKB	NIPSNAP3A	NIPSNAP3A	EXOSC1
IRGQ	INTS4	DNAJC16	DGKE	NIT1	NIT1	EXOSC10
ISCA2	INTS5	DNAJC17	DGKG	NIT2	NIT2	EXOSC2
ISCU	INTS6	DNAJC19	DGKH	NLE1	NLE1	EXOSC3
ISG15	INTS7	DNAJC2	DGKQ	NLN	NLN	EXOSC4
ISG20	INTS9	DNAJC21	DGKZ	NLRP2	NLRP2	EXOSC5
ISG20L2	IPCEF1	DNAJC3	DGUOK	NMD3	NMD3	EXOSC6
ISOC1	IPO11	DNAJC30	DHCR24	NME1	NME1	EXOSC7
ISOC2	IPO4	DNAJC5	DHCR7	NME2	NME2	EXOSC8
IST1	IPO5	DNAJC7	DHDDS	NME3	NME3	EXOSC9
[truncated: 6,812 more rows]
